# Supplementary material for: Social interaction-induced activation of RNA splicing in the amygdala of microbiome-deficient mice
Source: eLife journal article supplement (doi:10.7554/elife.33070), 2018-05-29
Supplement: supp [file elife-33070-supp-v1.zip]

A

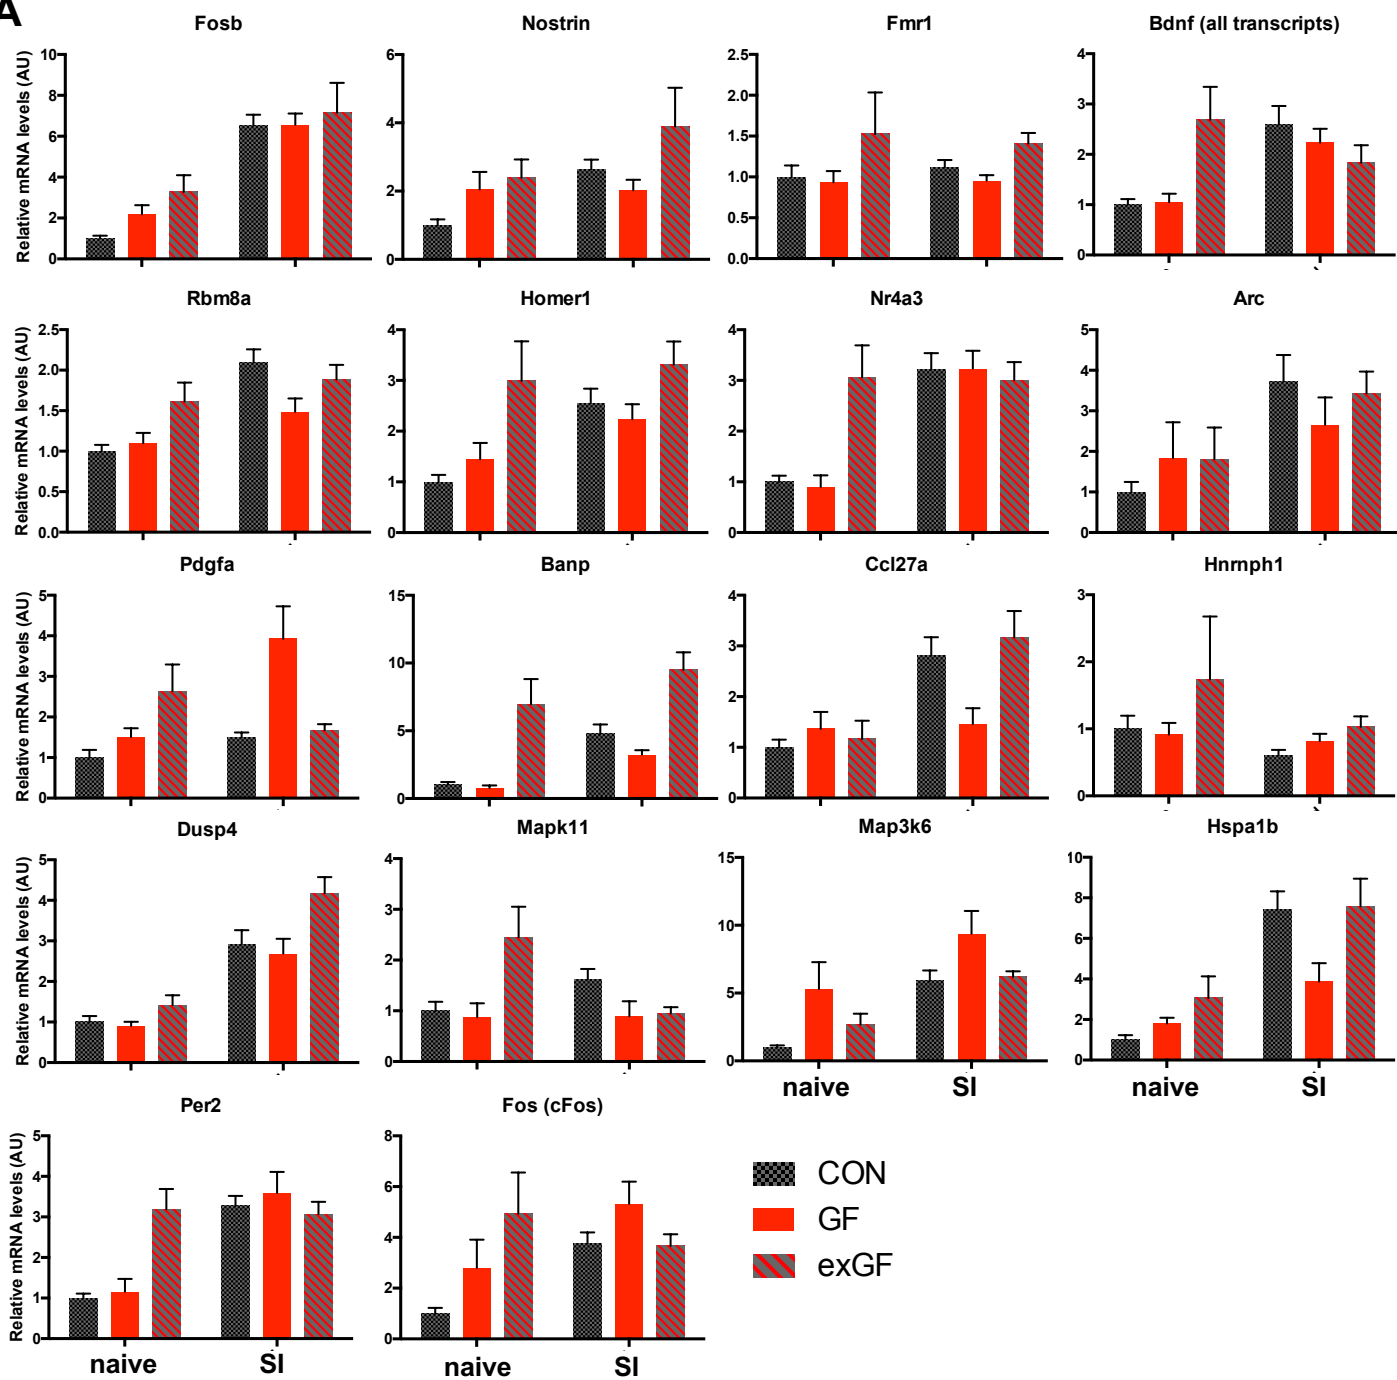

B

|             | Fosb | Nostrin | Fmr1 | Map3k6 | Homer1 | Hspa1b | Pdgfa | Banp | Ccl27a | Dusp4 | Rbm8a | Per2 | Nr4a3 | Fos | Mapk11 | Bdnf_all | Hnmp1 | Arc |
|-------------|------|---------|------|--------|--------|--------|-------|------|--------|-------|-------|------|-------|-----|--------|----------|-------|-----|
| CON-GF      |      |         |      |        |        |        |       |      |        |       |       |      |       |     |        |          |       |     |
| CON-exGF    |      |         |      |        |        |        |       |      |        |       |       |      |       |     |        |          |       |     |
| GF-exGF     |      |         |      |        |        |        |       |      |        |       |       |      |       |     |        |          |       |     |
| CON-CONsi   |      |         |      |        |        |        |       |      |        |       |       |      |       |     |        |          |       |     |
| GF-GFsi     |      |         |      |        |        |        |       |      |        |       |       |      |       |     |        |          |       |     |
| exGF-exGFsi |      |         |      |        |        |        |       |      |        |       |       |      |       |     |        |          |       |     |

|                       |    |     |
|-----------------------|----|-----|
| confirmed results     | 66 | 61% |
| opposite result       | 1  | 1%  |
| results not confirmed | 39 | 36% |

Total

108
