# Supplementary material for: Social interaction-induced activation of RNA splicing in the amygdala of microbiome-deficient mice
Source: eLife journal article supplement (doi:10.7554/elife.33070), 2018-05-29
Supplement: supp [file elife-33070-supp-v1.zip]

**More stringent filter criteria:  $p_{\text{adj}} < 0.1$ ,  $\log_2(\text{FC}) > |\pm 0.5|$**

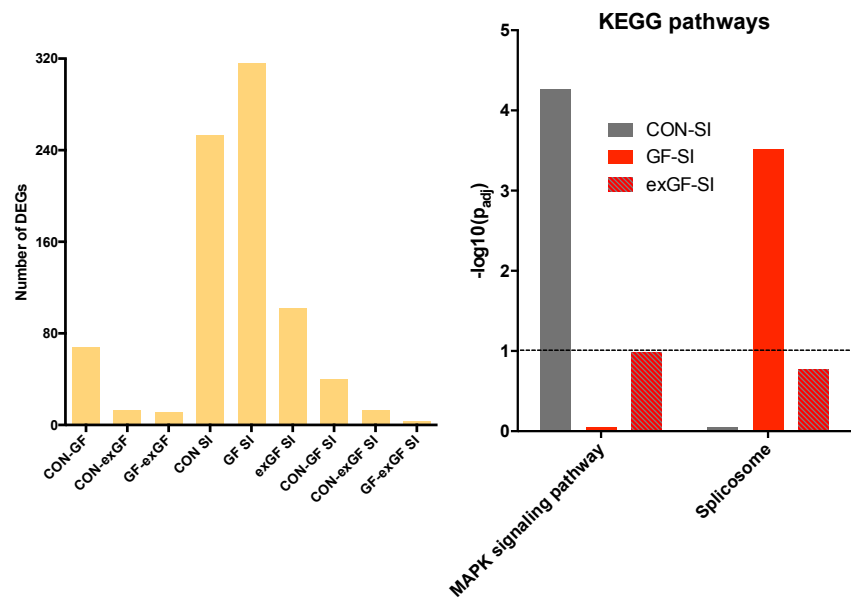

# B

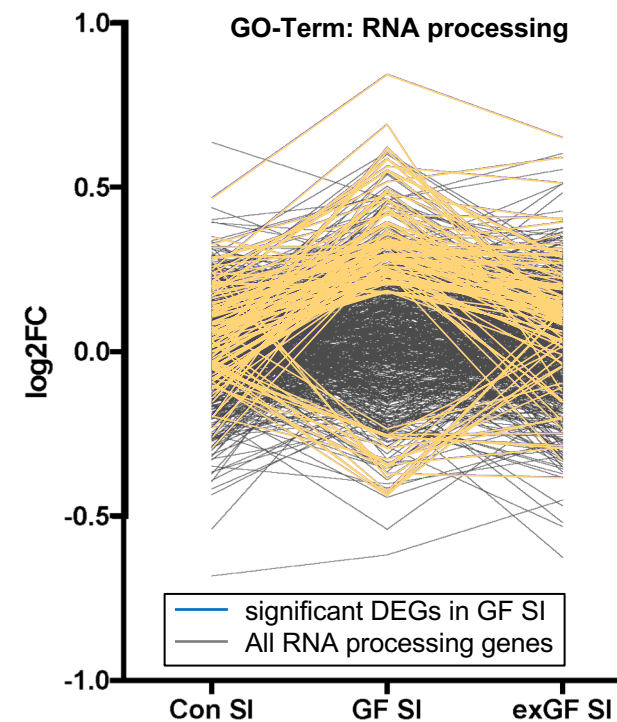

**C**

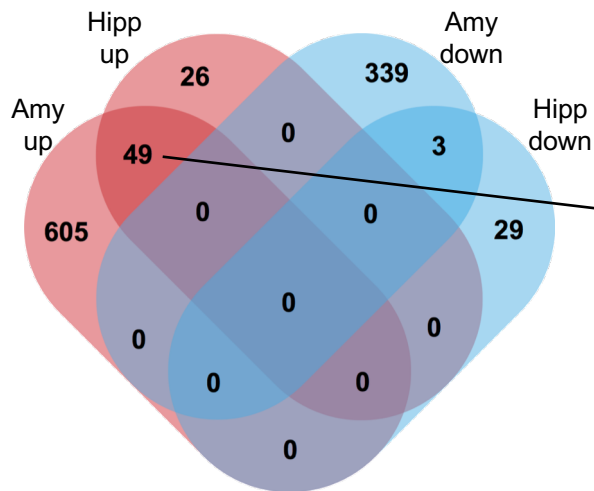

|         |           |
|---------|-----------|
| Adipor2 | Arc       |
|         | Arl4d     |
|         | Arl5b     |
|         | Cdkn1a    |
|         | Coq10b    |
|         | Dio2      |
|         | Dnajb1    |
|         | Dnajb5    |
|         | Dusp4     |
|         | Dusp6     |
|         | Egr1      |
|         | Egr2      |
|         | Egr3      |
|         | Egr4      |
|         | Errf1     |
|         | Fam46a    |
|         | Fos       |
|         | Fosb      |
|         | Fosl2     |
|         | Gadd45b   |
|         | Gpr3      |
|         | Gpt2      |
|         | Homer1    |
|         | Ier5      |
|         | Irs2      |
|         | Kdm7a     |
|         | Lingo3    |
|         | Map3k19   |
|         | Mfsd2a    |
|         | Midn      |
|         | Nfkbia    |
|         | Nostrin   |
|         | Nptx2     |
|         | Nr4a3     |
|         | Pcsk1     |
|         | Per1      |
|         | Per2      |
|         | Plin4     |
|         | Ppp1r3g   |
|         | Prr5      |
|         | Rrp8      |
|         | Sertad1   |
|         | Sik1      |
|         | Slc2a1    |
|         | Smim3     |
|         | Tnfrsf12a |
|         | Tsc2d3    |
|         | Zdbf2     |
