# Supplementary material for: Social interaction-induced activation of RNA splicing in the amygdala of microbiome-deficient mice
Source: eLife. 2018 May 29;7:e33070. doi: 10.7554/eLife.33070 (PMC5995540; doi:10.7554/eLife.33070)
Supplement: Supplementary file 1. [file elife-33070-supp1.xlsx]

## Sheet: CON-GF
Ensembl Gene ID	Associated Gene Name	Gene Start (bp)	Gene End (bp)	% GC content	Gene type	Description	baseMean	log2FoldChange	lfcSE	stat	pvalue	padj	FC	Length
ENSMUSG00000003545	Fosb	19302721	19310045	54.95	protein_coding	FBJ osteosarcoma oncogene B	93.2827	0.86623	0.128838	6.72342	1.77513e-11	5.20469e-08	1.82289	7324
ENSMUSG00000020912	Krt12	99415666	99422259	45.75	protein_coding	keratin 12	50.4148	0.864057	0.151793	5.69234	1.25312e-08	1.86644e-05	1.82015	6593
ENSMUSG00000038560	Sp6	97013394	97024734	52.37	protein_coding	trans-acting transcription factor 6	33.0236	0.825907	0.149611	5.52035	3.38325e-08	3.57793e-05	1.77265	11340
ENSMUSG00000036073	Galt	41755228	41758695	54.56	protein_coding	galactose-1-phosphate uridyl transferase	214.821	0.81502	0.149872	5.4381	5.38512e-08	5.26306e-05	1.75932	3467
ENSMUSG00000041453	Rpl21	146832890	146837032	47.16	protein_coding	ribosomal protein L21	2856.97	0.801838	0.144098	5.56453	2.62867e-08	3.21136e-05	1.74332	4142
ENSMUSG00000036915	Kirrel2	30447534	30457690	51.33	protein_coding	kin of IRRE like 2 (Drosophila)	46.6341	0.69893	0.152101	4.59518	4.32372e-06	0.00226377	1.6233	10156
ENSMUSG00000078490	C030017K20Rik	155409190	155466823	48.14	protein_coding	RIKEN cDNA C030017K20 gene	102.076	0.681998	0.14669	4.64926	3.33128e-06	0.00187833	1.60436	57633
ENSMUSG00000027940	Tpm3	90072649	90100902	46.52	protein_coding	tropomyosin 3, gamma	1062.93	0.638304	0.112765	5.66049	1.50942e-08	2.01164e-05	1.5565	28253
ENSMUSG00000028970	Abcb1b	8798147	8866314	41.37	protein_coding	ATP-binding cassette, sub-family B (MDR/TAP), member 1B	33.7344	0.609701	0.150273	4.05729	4.96446e-05	0.0173382	1.52594	68167
ENSMUSG00000044258	Ctla2a	60934155	60936625	42.78	protein_coding	cytotoxic T lymphocyte-associated protein 2 alpha	108.627	0.608326	0.15073	4.03586	5.44037e-05	0.0173382	1.52449	2470
ENSMUSG00000010021	Kif19a	114765388	114790739	53.4	protein_coding	kinesin family member 19A	30.9695	0.604163	0.152015	3.97437	7.05656e-05	0.0215519	1.5201	25351
ENSMUSG00000029319	Coq2	100654723	100675140	46.08	protein_coding	coenzyme Q2 homolog, prenyltransferase (yeast)	410.432	0.604117	0.120465	5.01489	5.30644e-07	0.000388962	1.52005	20417
ENSMUSG00000056536	Pign	105518422	105663677	38.51	protein_coding	phosphatidylinositol glycan anchor biosynthesis, class N	243.405	0.596843	0.1049	5.68963	1.27315e-08	1.86644e-05	1.5124	145255
ENSMUSG00000067916	Gm13139	147132038	147180579	39.3	protein_coding	predicted gene 13139	43.5704	0.596576	0.151164	3.94654	7.92888e-05	0.0227916	1.51212	48541
ENSMUSG00000076617	Ighm	113418558	113422730	49.92	IG_C_gene	immunoglobulin heavy constant mu	79.4742	0.586606	0.151271	3.87784	0.000105387	0.0275888	1.50171	4172
ENSMUSG00000041801	Phlda3	135766119	135769136	55.77	protein_coding	pleckstrin homology-like domain, family A, member 3	48.9644	0.56761	0.14527	3.90728	9.33428e-05	0.0253408	1.48207	3017
ENSMUSG00000078495	Gm13157	147753974	147809788	38.57	protein_coding	predicted gene 13157	39.7443	0.561209	0.151497	3.70441	0.00021188	0.0450168	1.47551	55814
ENSMUSG00000085609	1700016P03Rik	75172560	75177633	51.42	processed_transcript	RIKEN cDNA 1700016P03 gene	51.6543	0.545257	0.151626	3.59606	0.00032307	0.0568297	1.45928	5073
ENSMUSG00000073888	Ccl27a	41769467	41774247	52.27	protein_coding	chemokine (C-C motif) ligand 27A	386.875	0.53707	0.150303	3.57326	0.00035257	0.0573662	1.45102	4780
ENSMUSG00000028776	Tinagl1	130164454	130175122	54.57	protein_coding	tubulointerstitial nephritis antigen-like 1	38.0411	0.534282	0.15214	3.51177	0.000445137	0.0679761	1.44822	10668
ENSMUSG00000039167	Eltd1	151437887	151545086	38.34	protein_coding	EGF, latrophilin seven transmembrane domain containing 1	215.013	0.53236	0.140113	3.79951	0.000144985	0.0366461	1.44629	107199
ENSMUSG00000039195	1110008P14Rik	32377097	32381938	55.53	protein_coding	RIKEN cDNA 1110008P14 gene	721.998	0.531022	0.130939	4.05549	5.00295e-05	0.0173382	1.44495	4841
ENSMUSG00000034738	Nostrin	69135800	69189330	42.58	protein_coding	nitric oxide synthase trafficker	43.0728	0.528276	0.152217	3.47055	0.000519402	0.0706957	1.4422	53530
ENSMUSG00000021367	Edn1	42301270	42307989	45.8	protein_coding	endothelin 1	37.9296	0.528114	0.152176	3.47043	0.000519629	0.0706957	1.44204	6719
ENSMUSG00000036896	C1qc	136889804	136893065	55.12	protein_coding	complement component 1, q subcomponent, C chain	101.595	0.526311	0.141877	3.70963	0.00020756	0.0447475	1.44024	3261
ENSMUSG00000028645	Slc2a1	119108711	119137330	51.24	protein_coding	solute carrier family 2 (facilitated glucose transporter), member 1	733.975	0.524968	0.128807	4.07561	4.58943e-05	0.0168203	1.4389	28619
ENSMUSG00000036078	Sigmar1	41738493	41756157	47.61	protein_coding	sigma non-opioid intracellular receptor 1	272.415	0.522466	0.140032	3.73103	0.000190697	0.0436815	1.43641	17664
ENSMUSG00000067158	Col4a4	82448423	82586849	43.02	protein_coding	collagen, type IV, alpha 4	12.8827	0.513392	0.140816	3.64583	0.000266535	0.0520987	1.4274	138426
ENSMUSG00000099980	Gm5619	85781868	85782627	55	processed_pseudogene	predicted gene 5619	24.6467	0.511228	0.135824	3.7639	0.000167287	0.0392952	1.42526	759
ENSMUSG00000078794	Dact3	16875317	16887301	54.22	protein_coding	dapper homolog 3, antagonist of beta-catenin (xenopus)	1062.82	0.503095	0.136131	3.69566	0.000219314	0.0459307	1.41725	11984
ENSMUSG00000044716	Dok7	35056813	35087839	55.11	protein_coding	docking protein 7	113.599	0.498972	0.137575	3.62691	0.000286838	0.0546109	1.41321	31026
ENSMUSG00000027435	Cd93	148436640	148443563	47.43	protein_coding	CD93 antigen	161.415	0.497413	0.118314	4.2042	2.62012e-05	0.0106697	1.41168	6923
ENSMUSG00000019970	Sgk1	21882184	21999903	43.78	protein_coding	serum/glucocorticoid regulated kinase 1	780.687	0.495587	0.145396	3.40854	0.000653108	0.0825324	1.40989	117719
ENSMUSG00000070601	Vmn2r84	130385316	130394241	34.33	protein_coding	vomeronasal 2, receptor 84	15.906	0.483728	0.145143	3.33277	0.000859865	0.091224	1.39835	8925
ENSMUSG00000031431	Tsc22d3	140539528	140600659	43.57	protein_coding	TSC22 domain family, member 3	626.259	0.466385	0.125722	3.70966	0.00020754	0.0447475	1.38164	61131
ENSMUSG00000084350	Znf41-ps	145825237	145829942	36.53	unprocessed_pseudogene	ZNF41, pseudogene	19.981	0.459688	0.134993	3.40528	0.000660968	0.0825324	1.37524	4705
ENSMUSG00000103753	RP24-490B17.3	51832819	51834723	55.59	TEC		10.5926	0.458828	0.130344	3.52013	0.000431335	0.0668266	1.37442	1904
ENSMUSG00000000531	Grasp	101224207	101232755	55.66	protein_coding	GRP1 (general receptor for phosphoinositides 1)-associated scaffold protein	389.642	0.456983	0.135561	3.37106	0.000748801	0.0878516	1.37267	8548
ENSMUSG00000090223	Pcp4	96467606	96525793	44.71	protein_coding	Purkinje cell protein 4	2312.07	0.455637	0.122665	3.71449	0.000203614	0.0447475	1.37139	58187
ENSMUSG00000029001	Fbxo44	148152800	148160482	52.83	protein_coding	F-box protein 44	626.24	0.44991	0.105203	4.2766	1.89766e-05	0.00818224	1.36595	7682
ENSMUSG00000098702	1500015A07Rik	61726390	61735917	45.99	antisense	RIKEN cDNA 1500015A07 gene	183.877	0.447674	0.124852	3.58565	0.000336239	0.0568297	1.36384	9527
ENSMUSG00000071076	Jund	70697739	70700616	62.68	protein_coding	jun D proto-oncogene	278.925	0.434299	0.129678	3.34905	0.00081089	0.0897496	1.35125	2877
ENSMUSG00000097023	AI854517	79500026	79534403	51.48	lincRNA	expressed sequence AI854517	173.907	0.432097	0.130337	3.31523	0.000915693	0.0932227	1.34919	34377
ENSMUSG00000030096	Slc6a6	91684067	91759063	50.75	protein_coding	solute carrier family 6 (neurotransmitter transporter, taurine), member 6	1522.84	0.431815	0.0931893	4.63374	3.59121e-06	0.00194989	1.34893	74996
ENSMUSG00000002504	Slc9a3r2	24639282	24650305	56.16	protein_coding	solute carrier family 9 (sodium/hydrogen exchanger), member 3 regulator 2	283.276	0.421913	0.106428	3.96431	7.36092e-05	0.0220227	1.3397	11023
ENSMUSG00000015377	Dennd6b	89182217	89196474	52.95	protein_coding	DENN/MADD domain containing 6B	223.708	0.420803	0.116872	3.60056	0.000317536	0.0567692	1.33867	14257
ENSMUSG00000028703	Lrrc41	116075269	116097043	45.31	protein_coding	leucine rich repeat containing 41	448.666	0.409889	0.109987	3.72672	0.000193992	0.0437525	1.32858	21774
ENSMUSG00000097164	Cep83os	94673493	94688613	40.9	lincRNA	centrosomal protein 83, opposite strand	494.872	0.400285	0.101756	3.93378	8.36219e-05	0.0235749	1.31977	15120
ENSMUSG00000039106	Htr5a	27841947	27855086	45.53	protein_coding	5-hydroxytryptamine (serotonin) receptor 5A	263.83	0.391876	0.101894	3.84591	0.000120106	0.0308903	1.3121	13139
ENSMUSG00000036578	Fxyd7	31042517	31051462	51.32	protein_coding	FXYD domain-containing ion transport regulator 7	485.717	0.375844	0.106042	3.54431	0.000393642	0.0620516	1.2976	8945
ENSMUSG00000032840	2410131K14Rik	118245227	118266093	50.55	protein_coding	RIKEN cDNA 2410131K14 gene	255.443	0.372341	0.106511	3.4958	0.000472644	0.0703281	1.29445	20866
ENSMUSG00000060227	Casc4	121866970	121936220	39.76	protein_coding	cancer susceptibility candidate 4	2279.23	0.367161	0.105278	3.48752	0.000487515	0.0704497	1.28981	69250
ENSMUSG00000070493	Chchd2	129881156	129887470	46.52	protein_coding	coiled-coil-helix-coiled-coil-helix domain containing 2	1097.71	0.363491	0.109315	3.32518	0.000883616	0.091224	1.28654	6314
ENSMUSG00000022634	Yaf2	93284278	93336935	42.85	protein_coding	YY1 associated factor 2	850.385	0.357447	0.107442	3.32687	0.000878267	0.091224	1.28116	52657
ENSMUSG00000035805	Mlc1	88955884	88979007	47.34	protein_coding	megalencephalic leukoencephalopathy with subcortical cysts 1 homolog (human)	1119.72	0.325887	0.0900994	3.61697	0.000298075	0.0553136	1.25343	23123
ENSMUSG00000072235	Tuba1a	98949841	98953551	48.83	protein_coding	tubulin, alpha 1A	5216.01	0.324306	0.0974887	3.32661	0.0008791	0.091224	1.25206	3710
ENSMUSG00000001627	Ifrd1	40201567	40248504	41.54	protein_coding	interferon-related developmental regulator 1	404.519	0.312794	0.0949012	3.296	0.000980711	0.0978043	1.24211	46937
ENSMUSG00000004187	Kifc2	76660641	76668196	53.65	protein_coding	kinesin family member C2	3933.25	0.311679	0.093584	3.33047	0.00086698	0.091224	1.24115	7555
ENSMUSG00000042182	Bend6	33852052	33907816	41.79	protein_coding	BEN domain containing 6	1672.12	0.309073	0.09284	3.3291	0.00087128	0.091224	1.23891	55764
ENSMUSG00000072769	Gm10419	108369858	108378239	43.4	protein_coding	predicted gene 10419	504.867	0.299171	0.0856116	3.49451	0.00047493	0.0703281	1.23044	8381
ENSMUSG00000059974	Ntm	28994750	29963141	42.68	protein_coding	neurotrimin	3920.4	0.298669	0.0817715	3.65248	0.000259715	0.0514516	1.23001	968391
ENSMUSG00000031791	Tmem38a	72572103	72587282	49.37	protein_coding	transmembrane protein 38A	568.854	0.285508	0.0850565	3.35669	0.00078881	0.0896431	1.21884	15179
ENSMUSG00000040652	Oaz2	65668001	65690300	46.75	protein_coding	ornithine decarboxylase antizyme 2	990.84	0.283785	0.0834152	3.40208	0.000668757	0.0825324	1.21738	22299
ENSMUSG00000026473	Glul	153899944	153909723	49.21	protein_coding	glutamate-ammonia ligase (glutamine synthetase)	11202	0.269106	0.0802789	3.35214	0.000801902	0.0897496	1.20506	9779
ENSMUSG00000007415	Gatad1	3632932	3647934	41.7	protein_coding	GATA zinc finger domain containing 1	655.537	0.266704	0.0768639	3.46982	0.000520814	0.0706957	1.20306	15002
ENSMUSG00000040407	Akap9	3928054	4080209	41.18	protein_coding	A kinase (PRKA) anchor protein (yotiao) 9	3592.23	-0.257702	0.0744854	-3.45977	0.000540635	0.0720519	0.836419	152155
ENSMUSG00000030583	Sipa1l3	29320372	29518641	50.4	protein_coding	signal-induced proliferation-associated 1 like 3	446.694	-0.314906	0.0933893	-3.37197	0.000746314	0.0878516	0.803903	198269
ENSMUSG00000063457	Rps15	80292453	80294114	58.9	protein_coding	ribosomal protein S15	1031.41	-0.325929	0.0958167	-3.40159	0.000669942	0.0825324	0.797784	1661
ENSMUSG00000049553	Polr1a	71909053	71979356	46.59	protein_coding	polymerase (RNA) I polypeptide A	396.925	-0.325959	0.0986369	-3.30463	0.000951003	0.0961497	0.797768	70303
ENSMUSG00000025823	Pdia4	47796142	47813512	45.79	protein_coding	protein disulfide isomerase associated 4	702.33	-0.331043	0.0875904	-3.77944	0.00015718	0.0390552	0.794962	17370
ENSMUSG00000063450	Syne2	75818134	76110926	44.56	protein_coding	spectrin repeat containing, nuclear envelope 2	409.907	-0.341152	0.101269	-3.36876	0.000755068	0.0878516	0.789411	292792
ENSMUSG00000060771	Tsga10	37754776	37866429	40.33	protein_coding	testis specific 10	273.059	-0.344053	0.10089	-3.41018	0.000649202	0.0825324	0.787825	111653
ENSMUSG00000037669	1110057K04Rik	8208107	8285758	41.99	protein_coding	RIKEN cDNA 1110057K04 gene	233.85	-0.345472	0.101483	-3.40423	0.000663501	0.0825324	0.787051	77651
ENSMUSG00000041360	D19Bwg1357e	27388702	27429820	42.65	protein_coding	DNA segment, Chr 19, Brigham & Women's Genetics 1357 expressed	423.333	-0.345823	0.0995552	-3.47368	0.000513375	0.0706957	0.786859	41118
ENSMUSG00000027748	Trpc4	54156057	54318470	40.03	protein_coding	transient receptor potential cation channel, subfamily C, member 4	265.967	-0.346386	0.0993627	-3.48607	0.000490169	0.0704497	0.786552	162413
ENSMUSG00000035954	Dock4	40446053	40846486	40.82	protein_coding	dedicator of cytokinesis 4	2150.59	-0.346605	0.0921442	-3.76154	0.000168867	0.0392952	0.786433	400433
ENSMUSG00000053332	Gas5	161034422	161038539	46.21	processed_transcript	growth arrest specific 5	941.077	-0.364214	0.0836432	-4.35437	1.3345e-05	0.0063109	0.776892	4117
ENSMUSG00000036478	Btg1	96617001	96622813	45.54	protein_coding	B cell translocation gene 1, anti-proliferative	244.239	-0.36455	0.109416	-3.33178	0.000862919	0.091224	0.776711	5812
ENSMUSG00000022000	Zc3h13	75284373	75344426	38.92	protein_coding	zinc finger CCCH type containing 13	1389.63	-0.3679	0.102411	-3.59237	0.000327689	0.0568297	0.77491	60053
ENSMUSG00000018661	Cog1	113649169	113667054	49.78	protein_coding	component of oligomeric golgi complex 1	371.197	-0.375456	0.105151	-3.57065	0.000356093	0.0573662	0.770862	17885
ENSMUSG00000033282	Rpgrip1l	91217030	91313262	39.84	protein_coding	Rpgrip1-like	626.621	-0.378593	0.100566	-3.76463	0.000166795	0.0392952	0.769187	96232
ENSMUSG00000034453	Polr3b	84622437	84727177	44.2	protein_coding	polymerase (RNA) III (DNA directed) polypeptide B	286.595	-0.379409	0.105007	-3.61317	0.000302479	0.0554292	0.768752	104740
ENSMUSG00000019505	Ubb	62551171	62553213	52.23	protein_coding	ubiquitin B	1267.65	-0.38057	0.0976233	-3.89835	9.6849e-05	0.0258146	0.768134	2042
ENSMUSG00000058402	Zfp420	29859979	29877292	43.38	protein_coding	zinc finger protein 420	158.632	-0.388816	0.116132	-3.34806	0.000813807	0.0897496	0.763756	17313
ENSMUSG00000031155	Pim2	7878262	7883432	50.34	protein_coding	proviral integration site 2	174.837	-0.389911	0.108766	-3.58486	0.000337257	0.0568297	0.763177	5170
ENSMUSG00000046185	Zfp84	29768552	29779821	45.35	protein_coding	zinc finger protein 84	268.567	-0.390189	0.10587	-3.68557	0.000228195	0.0471173	0.76303	11269
ENSMUSG00000038351	Sgsm2	74849261	74897060	49.77	protein_coding	small G protein signaling modulator 2	570.071	-0.397236	0.0973104	-4.08215	4.4621e-05	0.0168203	0.759312	47799
ENSMUSG00000093483	AA465934	83291699	83294632	42.77	processed_transcript	expressed sequence AA465934	83.9846	-0.404368	0.119072	-3.396	0.000683791	0.0828461	0.755567	2933
ENSMUSG00000035632	Cnot3	3645290	3661108	51.01	protein_coding	CCR4-NOT transcription complex, subunit 3	214.538	-0.414774	0.123094	-3.36956	0.00075288	0.0878516	0.750137	15818
ENSMUSG00000025579	Gaa	119267887	119285454	55.42	protein_coding	glucosidase, alpha, acid	1516.01	-0.415986	0.122726	-3.38956	0.000700062	0.0841222	0.749507	17567
ENSMUSG00000036885	Arhgef26	62338344	62462221	41.76	protein_coding	Rho guanine nucleotide exchange factor (GEF) 26	264.287	-0.431234	0.1264	-3.41165	0.000645717	0.0825324	0.741627	123877
ENSMUSG00000091400	Gm6356	6965449	6973818	41.76	protein_coding	predicted gene 6356	15.1945	-0.43204	0.118806	-3.63651	0.000276355	0.0533074	0.741213	8369
ENSMUSG00000019874	Fabp7	57784881	57788450	38.38	protein_coding	fatty acid binding protein 7, brain	707.491	-0.447757	0.130703	-3.42576	0.000613076	0.0802473	0.733182	3569
ENSMUSG00000020253	Ppm1m	106194172	106199746	54.64	protein_coding	protein phosphatase 1M	90.4571	-0.450574	0.133914	-3.36465	0.000766404	0.0884683	0.731751	5574
ENSMUSG00000038374	Rbm8a	96629928	96633779	43.46	protein_coding	RNA binding motif protein 8a	492.537	-0.450909	0.12504	-3.60612	0.000310814	0.0562535	0.731582	3851
ENSMUSG00000022306	Zfpm2	40655042	41104592	37.29	protein_coding	zinc finger protein, multitype 2	231.648	-0.455766	0.13848	-3.29121	0.000997582	0.0988145	0.729123	449550
ENSMUSG00000023913	Pla2g7	43568098	43612201	43.77	protein_coding	phospholipase A2, group VII (platelet-activating factor acetylhydrolase, plasma)	1139.98	-0.457937	0.137118	-3.33972	0.000838614	0.0910673	0.728027	44103
ENSMUSG00000059775	Rps26-ps1	107439176	107439585	54.15	protein_coding	ribosomal protein S26, pseudogene 1	26.2062	-0.458583	0.130741	-3.50756	0.000452233	0.0683479	0.727701	409
ENSMUSG00000046516	Cox17	38346991	38352763	44.64	protein_coding	cytochrome c oxidase assembly protein 17	330.061	-0.45937	0.131627	-3.48995	0.000483113	0.0704497	0.727304	5772
ENSMUSG00000022247	Brix1	10474779	10485947	40.33	protein_coding	BRX1, biogenesis of ribosomes, homolog (S. cerevisiae)	201.318	-0.466768	0.115417	-4.0442	5.25026e-05	0.0173382	0.723584	11168
ENSMUSG00000058135	Gstm1	108012255	108017973	51.3	protein_coding	glutathione S-transferase, mu 1	674.817	-0.470039	0.128339	-3.66249	0.000249778	0.0501609	0.721945	5718
ENSMUSG00000060093	Hist1h4a	23760692	23761230	56.22	protein_coding	histone cluster 1, H4a	241.763	-0.471553	0.13885	-3.39613	0.000683464	0.0828461	0.721188	538
ENSMUSG00000064346	mt-Tw	4950	5016	40.3	Mt_tRNA	mitochondrially encoded tRNA tryptophan	165.963	-0.480819	0.135194	-3.55651	0.00037581	0.0598846	0.716571	66
ENSMUSG00000023873	1700010I14Rik	8988333	9008319	45.73	protein_coding	RIKEN cDNA 1700010I14 gene	15.6794	-0.48173	0.144216	-3.34034	0.000836748	0.0910673	0.716118	19986
ENSMUSG00000045817	Zfp36l2	84183931	84187947	56.16	protein_coding	zinc finger protein 36, C3H type-like 2	138.332	-0.48416	0.139487	-3.471	0.000518517	0.0706957	0.714913	4016
ENSMUSG00000071658	Gng3	8836929	8839246	51.98	protein_coding	guanine nucleotide binding protein (G protein), gamma 3	514.269	-0.492877	0.147219	-3.34791	0.000814236	0.0897496	0.710607	2317
ENSMUSG00000062960	Kdr	75932827	75978458	44.53	protein_coding	kinase insert domain protein receptor	168.608	-0.496157	0.13705	-3.62025	0.000294318	0.0553136	0.708993	45631
ENSMUSG00000064343	mt-Tq	3772	3842	36.62	Mt_tRNA	mitochondrially encoded tRNA glutamine	71.7995	-0.496306	0.150549	-3.29665	0.000978462	0.0978043	0.70892	70
ENSMUSG00000044726	Erich5	34453312	34473892	42.71	protein_coding	glutamate rich 5	19.5627	-0.496592	0.143974	-3.44917	0.000562306	0.0742649	0.708779	20580
ENSMUSG00000020680	Taf15	83473086	83506743	37.89	protein_coding	TAF15 RNA polymerase II, TATA box binding protein (TBP)-associated factor	263.396	-0.497991	0.149878	-3.32263	0.000891731	0.091418	0.708092	33657
ENSMUSG00000089997	1810020O05Rik	87675593	87690847	43.78	lincRNA	Riken cDNA 1810020O05 gene	12.3915	-0.501392	0.140283	-3.57416	0.000351354	0.0573662	0.706425	15254
ENSMUSG00000043969	Emx2	59458372	59465357	52.05	protein_coding	empty spiracles homeobox 2	72.4966	-0.504216	0.150201	-3.35695	0.000788069	0.0896431	0.705044	6985
ENSMUSG00000039179	Tekt5	10357948	10395490	48.87	protein_coding	tektin 5	58.9936	-0.508295	0.146681	-3.46532	0.000529602	0.071229	0.703053	37542
ENSMUSG00000070532	1700084C01Rik	169928648	169934653	46.6	protein_coding	RIKEN cDNA 1700084C01 gene	124.345	-0.51014	0.119469	-4.27007	1.95411e-05	0.00818495	0.702154	6005
ENSMUSG00000073705	Apitd1	149127121	149137629	50.38	protein_coding	apoptosis-inducing, TAF9-like domain 1	17.4086	-0.514432	0.143411	-3.58713	0.00033434	0.0568297	0.700068	10508
ENSMUSG00000057969	Sema3b	107597674	107609229	55.37	protein_coding	sema domain, immunoglobulin domain (Ig), short basic domain, secreted, (semaphorin) 3B	50.8248	-0.521261	0.14981	-3.47949	0.000502374	0.0706957	0.696763	11555
ENSMUSG00000075391	Gm13443	35340409	35340963	48.65	processed_pseudogene	predicted gene 13443	12.5589	-0.522922	0.142181	-3.67785	0.00023521	0.0478914	0.695961	554
ENSMUSG00000032332	Col12a1	79598991	79718831	39.5	protein_coding	collagen, type XII, alpha 1	189.593	-0.522945	0.119702	-4.36874	1.24968e-05	0.00610676	0.69595	119840
ENSMUSG00000024026	Glo1	30592866	30612659	46.65	protein_coding	glyoxalase 1	745.309	-0.52631	0.0977651	-5.38341	7.30864e-08	6.69654e-05	0.694328	19793
ENSMUSG00000026579	F5	164151838	164220277	41.94	protein_coding	coagulation factor V	47.9542	-0.52694	0.149738	-3.51908	0.000433051	0.0668266	0.694025	68439
ENSMUSG00000043259	Fam13c	70440668	70558731	44.69	protein_coding	family with sequence similarity 13, member C	504.17	-0.531488	0.113995	-4.66236	3.12602e-06	0.0018331	0.691841	118063
ENSMUSG00000039410	Prdm16	154316125	154636873	51.48	protein_coding	PR domain containing 16	65.687	-0.533167	0.149094	-3.57605	0.000348826	0.0573662	0.691036	320748
ENSMUSG00000001506	Col1a1	94936224	94953042	53.92	protein_coding	collagen, type I, alpha 1	102.186	-0.533973	0.132295	-4.03622	5.43187e-05	0.0173382	0.69065	16818
ENSMUSG00000021098	4930447C04Rik	72881109	72940774	37.8	protein_coding	RIKEN cDNA 4930447C04 gene	15.1429	-0.537073	0.134536	-3.99204	6.55082e-05	0.020433	0.689168	59665
ENSMUSG00000058441	Panx2	89059734	89073567	55.46	protein_coding	pannexin 2	365.727	-0.538282	0.142671	-3.77289	0.000161367	0.0392952	0.68859	13833
ENSMUSG00000078870	Gm14410	177183453	177206421	41.77	protein_coding	predicted gene 14410	410.056	-0.541415	0.130747	-4.14093	3.45907e-05	0.0137054	0.687096	22968
ENSMUSG00000023236	Scg5	113776362	113829121	44.43	protein_coding	secretogranin V	2892.92	-0.547286	0.115828	-4.725	2.3011e-06	0.00140559	0.684306	52759
ENSMUSG00000027737	Slc7a11	49892526	50443614	38.81	protein_coding	solute carrier family 7 (cationic amino acid transporter, y+ system), member 11	1041.15	-0.548006	0.135364	-4.04838	5.15744e-05	0.0173382	0.683965	551088
ENSMUSG00000062647	Rpl7a	26910764	26913318	52.99	protein_coding	ribosomal protein L7A	731.65	-0.582391	0.119025	-4.893	9.93091e-07	0.000632988	0.667856	2554
ENSMUSG00000041577	Prelp	133910304	133921414	50.52	protein_coding	proline arginine-rich end leucine-rich repeat	116.943	-0.585221	0.14947	-3.9153	9.02907e-05	0.0249748	0.666547	11110
ENSMUSG00000078875	Gm14419	177000956	177012787	41.73	protein_coding	predicted gene 14419	38.3535	-0.601215	0.1522	-3.95016	7.81004e-05	0.0227916	0.659198	11831
ENSMUSG00000087692	Gm11940	99387340	99387897	40.14	antisense	predicted gene 11940	11.9335	-0.604658	0.139229	-4.3429	1.40612e-05	0.00644179	0.657627	557
ENSMUSG00000055775	Myh8	67277124	67308634	43.37	protein_coding	myosin, heavy polypeptide 8, skeletal muscle, perinatal	34.6037	-0.620217	0.152147	-4.07644	4.57306e-05	0.0168203	0.650573	31510
ENSMUSG00000087881	Gm22442	69350518	69350661	60.42	snoRNA	predicted gene, 22442	288.291	-0.634246	0.12407	-5.11201	3.18752e-07	0.000245942	0.644278	143	scaRNA21
ENSMUSG00000038242	Aox4	58210397	58268597	44.54	protein_coding	aldehyde oxidase 4	108.483	-0.653594	0.151176	-4.32339	1.53647e-05	0.00682565	0.635695	58200
ENSMUSG00000058126	Tpm3-rs7	113314608	113316713	49.34	protein_coding	tropomyosin 3, related sequence 7	449.941	-0.667808	0.101633	-6.57074	5.00644e-11	1.22324e-07	0.629463	2105
ENSMUSG00000070357	Cfap46	139600951	139616329	52.27	protein_coding	cilia and flagella associated protein 46	25.253	-0.69268	0.151847	-4.56169	5.07445e-06	0.00256522	0.618704	15378
ENSMUSG00000070583	Fv1	147868979	147870358	47.1	protein_coding	Friend virus susceptibility 1	73.4588	-0.719899	0.145392	-4.95144	7.36661e-07	0.000490884	0.60714	1379
ENSMUSG00000067017	Gm3608	105455971	105458829	42.25	pseudogene	predicted gene 3608	12.9439	-0.728785	0.138188	-5.27387	1.33578e-07	0.000115191	0.603412	2858
ENSMUSG00000097583	6430590A07Rik	40885897	40894123	41.3	lincRNA	RIKEN cDNA 6430590A07 gene	12.7221	-0.733703	0.1421	-5.16329	2.42651e-07	0.000197626	0.601359	8226
ENSMUSG00000058488	Kl	150952607	150993809	44.38	protein_coding	klotho	90.1933	-0.753194	0.150842	-4.99326	5.9367e-07	0.000414438	0.593289	41202
ENSMUSG00000051497	Kcnj16	110968033	111027968	40.24	protein_coding	potassium inwardly-rectifying channel, subfamily J, member 16	157.138	-0.813448	0.147401	-5.51861	3.41685e-08	3.57793e-05	0.56902	59935
ENSMUSG00000045257	Morn2	80290212	80297473	42.1	protein_coding	MORN repeat containing 2	72.5656	-0.88045	0.145769	-6.04005	1.5407e-09	2.82333e-06	0.543198	7261
ENSMUSG00000091383	Hist1h2al	51202688	51203065	67.2	protein_coding	histone cluster 1, H2al	86.9691	-0.955465	0.151643	-6.30077	2.96173e-10	6.20272e-07	0.515675	377
ENSMUSG00000030048	Gkn3	87383268	87388935	48.75	protein_coding	gastrokine 3	27.0088	-1.04732	0.152169	-6.88264	5.87539e-12	2.15333e-08	0.483865	5667
ENSMUSG00000095041	PISD	52190	59690	52.45	protein_coding	phosphatidylserine decarboxylase	472.162	-1.06629	0.149329	-7.14056	9.29535e-13	4.54233e-09	0.477546	7500
ENSMUSG00000081049	Rps24-ps3	79195047	79195448	45.27	processed_pseudogene	ribosomal protein S24, pseudogene 3	506.383	-1.22672	0.145286	-8.44348	3.08021e-17	2.2578e-13	0.427288	401
ENSMUSG00000043091	Tuba1c	99029891	99038105	49.65	protein_coding	tubulin, alpha 1C	70.177	-1.32512	0.150014	-8.83335	1.01591e-18	1.48932e-14	0.399115	8214

## Sheet: CON-exGF
Ensembl Gene ID	Associated Gene Name	Gene Start (bp)	Gene End (bp)	% GC content	Gene type	Description	baseMean	log2FoldChange	lfcSE	stat	pvalue	padj	FC	Gene length
ENSMUSG00000103378	RP24-490B17.1	51859167	51863217	40.26	TEC		43.6029	0.648807	0.101922	6.3657	1.94395e-10	7.61153e-07	1.56787	4050
ENSMUSG00000038560	Sp6	97013394	97024734	52.37	protein_coding	trans-acting transcription factor 6	25.3038	0.629503	0.109553	5.7461	9.13276e-09	1.5893e-05	1.54703	11340
ENSMUSG00000103358	RP24-490B17.2	51842861	51846114	41.92	TEC		44.0365	0.605096	0.102944	5.87791	4.15489e-09	8.13423e-06	1.52108	3253
ENSMUSG00000025290	Rps24	24490681	24496146	45.43	protein_coding	ribosomal protein S24	1603.34	0.575516	0.0915344	6.28743	3.22756e-10	1.011e-06	1.49021	5465
ENSMUSG00000103753	RP24-490B17.3	51832819	51834723	55.59	TEC		16.2752	0.531152	0.0945242	5.61921	1.91831e-08	2.73132e-05	1.44508	1904
ENSMUSG00000029319	Coq2	100654723	100675140	46.08	protein_coding	coenzyme Q2 homolog, prenyltransferase (yeast)	368.795	0.515031	0.102593	5.02014	5.16329e-07	0.000505421	1.42902	20417
ENSMUSG00000035299	Mid1	169685199	170005736	39.05	protein_coding	midline 1	80.5059	0.510898	0.106824	4.78261	1.7303e-06	0.00139378	1.42494	320537
ENSMUSG00000036073	Galt	41755228	41758695	54.56	protein_coding	galactose-1-phosphate uridyl transferase	158.52	0.497663	0.113687	4.37748	1.20061e-05	0.00752161	1.41192	3467
ENSMUSG00000072812	Ahnak2	112772194	112802657	58.33	protein_coding	AHNAK nucleoprotein 2	17.8499	0.497008	0.104258	4.76712	1.86882e-06	0.00139378	1.41128	30463
ENSMUSG00000056536	Pign	105518422	105663677	38.51	protein_coding	phosphatidylinositol glycan anchor biosynthesis, class N	215.094	0.483916	0.0936697	5.16619	2.38912e-07	0.000263439	1.39853	145255
ENSMUSG00000027940	Tpm3	90072649	90100902	46.52	protein_coding	tropomyosin 3, gamma	945.552	0.46531	0.107839	4.31485	1.59712e-05	0.00962083	1.38061	28253
ENSMUSG00000055866	Per2	91415982	91459324	51.23	protein_coding	period circadian clock 2	355.094	0.438864	0.0910188	4.82169	1.42349e-06	0.0012386	1.35554	43342
ENSMUSG00000078490	C030017K20Rik	155409190	155466823	48.14	protein_coding	RIKEN cDNA C030017K20 gene	83.3524	0.434688	0.113745	3.82159	0.000132595	0.0446822	1.35162	57633
ENSMUSG00000061232	H2-K1	33996017	34000333	53.83	protein_coding	histocompatibility 2, K1, K region	78.2099	0.433667	0.110532	3.92346	8.72859e-05	0.0350531	1.35066	4316
ENSMUSG00000067916	Gm13139	147132038	147180579	39.3	protein_coding	predicted gene 13139	35.4881	0.420849	0.110204	3.81883	0.000134087	0.0446822	1.33871	48541
ENSMUSG00000036915	Kirrel2	30447534	30457690	51.33	protein_coding	kin of IRRE like 2 (Drosophila)	35.241	0.419569	0.110837	3.78545	0.000153433	0.0490422	1.33753	10156
ENSMUSG00000018648	Dusp14	84048041	84069261	47.18	protein_coding	dual specificity phosphatase 14	379.94	0.417289	0.10491	3.97759	6.96171e-05	0.0286932	1.33542	21220
ENSMUSG00000025316	Banp	121949750	122029258	50.13	protein_coding	BTG3 associated nuclear protein	217.081	0.415908	0.100682	4.13091	3.61323e-05	0.0201697	1.33414	79508
ENSMUSG00000030103	Bhlhe40	108660629	108666925	47.28	protein_coding	basic helix-loop-helix family, member e40	669.102	0.407632	0.104714	3.8928	9.90938e-05	0.037655	1.32651	6296
ENSMUSG00000020912	Krt12	99415666	99422259	45.75	protein_coding	keratin 12	38.9367	0.405802	0.1052	3.85743	0.000114586	0.039881	1.32483	6593
ENSMUSG00000027227	Sord	122234749	122265340	45.99	protein_coding	sorbitol dehydrogenase	117.375	0.404498	0.107437	3.76497	0.000166567	0.0505607	1.32363	30591
ENSMUSG00000036052	Dnajb5	42949814	42959425	54.02	protein_coding	DnaJ (Hsp40) homolog, subfamily B, member 5	597.468	0.402076	0.0952855	4.2197	2.44628e-05	0.0141902	1.32141	9611
ENSMUSG00000020022	Ndufa12	94198955	94221443	44.95	protein_coding	NADH dehydrogenase (ubiquinone) 1 alpha subcomplex, 12	1022.96	0.400648	0.0992945	4.03495	5.46147e-05	0.0251581	1.3201	22488
ENSMUSG00000037868	Egr2	67535475	67542188	55.81	protein_coding	early growth response 2	89.8285	0.394447	0.105928	3.72371	0.000196313	0.0569379	1.31444	6713
ENSMUSG00000057143	Trim12c	104338754	104353362	41.48	protein_coding	tripartite motif-containing 12C	14.9581	0.38302	0.0992055	3.86088	0.000112979	0.039881	1.30407	14608
ENSMUSG00000040363	Bcor	12036740	12160355	51.07	protein_coding	BCL6 interacting corepressor	358.879	0.37264	0.0962118	3.87312	0.000107449	0.0391366	1.29472	123615
ENSMUSG00000099980	Gm5619	85781868	85782627	55	processed_pseudogene	predicted gene 5619	22.9301	0.366401	0.0901511	4.0643	4.81775e-05	0.025023	1.28913	759
ENSMUSG00000084350	Znf41-ps	145825237	145829942	36.53	unprocessed_pseudogene	ZNF41, pseudogene	19.5118	0.335166	0.0893235	3.75227	0.000175242	0.0517856	1.26152	4705
ENSMUSG00000024736	Tmem132a	10857822	10869940	54.57	protein_coding	transmembrane protein 132A	1688.09	0.313948	0.0776481	4.04321	5.27238e-05	0.025023	1.2431	12118
ENSMUSG00000067158	Col4a4	82448423	82586849	43.02	protein_coding	collagen, type IV, alpha 4	12.6933	0.310086	0.0873759	3.54887	0.00038689	0.099604	1.23978	138426
ENSMUSG00000059423	Zfp933	147822986	147848366	42.79	protein_coding	zinc finger protein 933	364.108	0.309896	0.087433	3.54438	0.000393535	0.099604	1.23962	25380
ENSMUSG00000033998	Kcnk1	125995102	126030683	47.46	protein_coding	potassium channel, subfamily K, member 1	382.746	0.307749	0.0790736	3.89193	9.94488e-05	0.037655	1.23778	35581
ENSMUSG00000067547	Gm7666	6653923	6654741	56.53	transcribed_processed_pseudogene	predicted pseudogene 7666	14.7182	0.291344	0.0797627	3.65264	0.000259561	0.0739134	1.22378	818
ENSMUSG00000035242	Oaz1	80826656	80829290	55.94	protein_coding	ornithine decarboxylase antizyme 1	1256.65	0.275759	0.0679947	4.0556	5.00065e-05	0.025023	1.21063	2634
ENSMUSG00000089883	Gm3355	13862317	13862803	49.69	processed_pseudogene	predicted gene 3355	11.8024	0.260928	0.073628	3.54387	0.000394295	0.099604	1.19825	486
ENSMUSG00000027273	Snap25	136713453	136782428	40.44	protein_coding	synaptosomal-associated protein 25	22961.2	0.256306	0.0633354	4.0468	5.19222e-05	0.025023	1.19442	68975
ENSMUSG00000042625	Safb2	56560965	56584585	51.23	protein_coding	scaffold attachment factor B2	322.89	-0.315403	0.0880039	-3.58396	0.00033842	0.0929884	0.803627	23620
ENSMUSG00000036862	Dchs1	105752989	105787654	50.44	protein_coding	dachsous 1 (Drosophila)	145.531	-0.362401	0.0997867	-3.63175	0.000281502	0.0787302	0.777869	34665
ENSMUSG00000032911	Cspg4	56865104	56899870	54.83	protein_coding	chondroitin sulfate proteoglycan 4	164.672	-0.371417	0.0984356	-3.7732	0.000161168	0.0504841	0.773023	34766
ENSMUSG00000019874	Fabp7	57784881	57788450	38.38	protein_coding	fatty acid binding protein 7, brain	668.683	-0.373152	0.0904983	-4.12331	3.73466e-05	0.0201697	0.772094	3569
ENSMUSG00000023764	Sfi1	3131850	3193463	46.21	protein_coding	Sfi1 homolog, spindle assembly associated (yeast)	133.681	-0.385939	0.108171	-3.56786	0.000359915	0.0955423	0.765281	61613
ENSMUSG00000100215	Gm8292	55335401	55335796	44.7	processed_pseudogene	predicted gene 8292	57.4849	-0.397138	0.105537	-3.76303	0.000167868	0.0505607	0.759363	395
ENSMUSG00000028140	Mrpl9	94443336	94448708	47.57	protein_coding	mitochondrial ribosomal protein L9	207.337	-0.400396	0.102976	-3.88823	0.000100978	0.037655	0.75765	5372
ENSMUSG00000002835	Chaf1a	56040416	56068026	48.05	protein_coding	chromatin assembly factor 1, subunit A (p150)	31.0801	-0.401621	0.112299	-3.57634	0.000348436	0.0940897	0.757007	27610
ENSMUSG00000097583	6430590A07Rik	40885897	40894123	41.3	lincRNA	RIKEN cDNA 6430590A07 gene	12.0502	-0.403929	0.0917686	-4.4016	1.07454e-05	0.00701229	0.755797	8226
ENSMUSG00000043091	Tuba1c	99029891	99038105	49.65	protein_coding	tubulin, alpha 1C	63.5047	-0.419834	0.0814266	-5.15598	2.52304e-07	0.000263439	0.747511	8214
ENSMUSG00000028364	Tnc	63959785	64047015	43.16	protein_coding	tenascin C	160.29	-0.421653	0.104721	-4.02646	5.66225e-05	0.0253377	0.746568	87230
ENSMUSG00000070583	Fv1	147868979	147870358	47.1	protein_coding	Friend virus susceptibility 1	72.5636	-0.432259	0.113404	-3.81166	0.000138036	0.0450399	0.741101	1379
ENSMUSG00000068855	Hist2h2ac	96220361	96220880	61.15	protein_coding	histone cluster 2, H2ac	37.5699	-0.442648	0.111111	-3.98385	6.78089e-05	0.0286932	0.735783	519
ENSMUSG00000024026	Glo1	30592866	30612659	46.65	protein_coding	glyoxalase 1	691.757	-0.443574	0.0853647	-5.19622	2.03378e-07	0.000245023	0.735311	19793
ENSMUSG00000089997	1810020O05Rik	87675593	87690847	43.78	lincRNA	Riken cDNA 1810020O05 gene	9.44467	-0.452731	0.0864341	-5.23788	1.62433e-07	0.000212002	0.730658	15254
ENSMUSG00000055862	Izumo4	80702693	80705382	56.13	protein_coding	IZUMO family member 4	57.0842	-0.455943	0.113696	-4.01018	6.06722e-05	0.0263958	0.729034	2689
ENSMUSG00000083557	Gm6877	33191196	33192296	43.78	processed_pseudogene	predicted pseudogene 6877	7.51373	-0.464305	0.0822299	-5.64642	1.63821e-08	2.56576e-05	0.72482	1100
ENSMUSG00000062647	Rpl7a	26910764	26913318	52.99	protein_coding	ribosomal protein L7A	671.453	-0.488335	0.104324	-4.68092	2.85587e-06	0.00203312	0.712848	2554
ENSMUSG00000055775	Myh8	67277124	67308634	43.37	protein_coding	myosin, heavy polypeptide 8, skeletal muscle, perinatal	31.6069	-0.492855	0.111741	-4.4107	1.03037e-05	0.00701229	0.710617	31510
ENSMUSG00000023236	Scg5	113776362	113829121	44.43	protein_coding	secretogranin V	2628.09	-0.497915	0.100438	-4.95742	7.14349e-07	0.000658125	0.70813	52759
ENSMUSG00000058126	Tpm3-rs7	113314608	113316713	49.34	protein_coding	tropomyosin 3, related sequence 7	371.694	-0.541903	0.113513	-4.77391	1.8068e-06	0.00139378	0.686864	2105
ENSMUSG00000067017	Gm3608	105455971	105458829	42.25	pseudogene	predicted gene 3608	10.9877	-0.555566	0.0897297	-6.19156	5.95721e-10	1.55503e-06	0.68039	2858
ENSMUSG00000051497	Kcnj16	110968033	111027968	40.24	protein_coding	potassium inwardly-rectifying channel, subfamily J, member 16	143.398	-0.694709	0.113485	-6.12158	9.26513e-10	2.07301e-06	0.617834	59935
ENSMUSG00000078700	D030028A08Rik	96916270	96965060	50.43	processed_transcript	RIKEN cDNA D030028A08 gene	49.4295	-0.942459	0.112939	-8.34483	7.13159e-17	3.72316e-13	0.520345	48790
ENSMUSG00000091383	Hist1h2al	51202688	51203065	67.2	protein_coding	histone cluster 1, H2al	73.1193	-1.06054	0.111386	-9.52136	1.70922e-21	1.33849e-17	0.479452	377
ENSMUSG00000095041	PISD	52190	59690	52.45	protein_coding	phosphatidylserine decarboxylase	412.538	-1.09422	0.113545	-9.63688	5.58579e-22	8.74847e-18	0.46839	7500

## Sheet: GF-exGF
Ensembl Gene ID	Associated Gene Name	Gene Start (bp)	Gene End (bp)	% GC content	Gene type	Description	baseMean	log2FoldChange	lfcSE	stat	pvalue	padj	FC	Length
ENSMUSG00000060981	Hist1h4h	23531050	23531522	57.51	protein_coding	histone cluster 1, H4h	505.012	0.638256	0.108973	5.85701	4.71285e-09	3.7145e-05	1.55645	472
ENSMUSG00000025316	Banp	121949750	122029258	50.13	protein_coding	BTG3 associated nuclear protein	242.384	0.584583	0.103932	5.62469	1.85844e-08	7.52729e-05	1.49961	79508
ENSMUSG00000069274	Hist1h4f	23551258	23551648	60.36	protein_coding	histone cluster 1, H4f	612.283	0.583869	0.119647	4.87994	1.06117e-06	0.00184204	1.49886	390
ENSMUSG00000060093	Hist1h4a	23760692	23761230	56.22	protein_coding	histone cluster 1, H4a	270.383	0.563097	0.117455	4.79414	1.63373e-06	0.00220572	1.47744	538
ENSMUSG00000030103	Bhlhe40	108660629	108666925	47.28	protein_coding	basic helix-loop-helix family, member e40	732.251	0.549222	0.122382	4.48776	7.19771e-06	0.00710758	1.4633	6296
ENSMUSG00000028341	Nr4a3	48045153	48086447	46.08	protein_coding	nuclear receptor subfamily 4, group A, member 3	452.581	0.523817	0.127967	4.09338	4.25122e-05	0.0234802	1.43775	41294
ENSMUSG00000055866	Per2	91415982	91459324	51.23	protein_coding	period circadian clock 2	402.664	0.519611	0.103194	5.03531	4.77083e-07	0.00115941	1.43357	43342
ENSMUSG00000074575	Kcng1	168260117	168281736	52.33	protein_coding	potassium voltage-gated channel, subfamily G, member 1	280.739	0.508552	0.119399	4.25926	2.05106e-05	0.0124612	1.42262	21619
ENSMUSG00000028062	Lamtor2	88549819	88553074	49.57	protein_coding	late endosomal/lysosomal adaptor, MAPK and MTOR activator 2	349.979	0.482373	0.10904	4.42382	9.69712e-06	0.0078864	1.39704	3255
ENSMUSG00000036052	Dnajb5	42949814	42959425	54.02	protein_coding	DnaJ (Hsp40) homolog, subfamily B, member 5	689.073	0.48018	0.0881583	5.44679	5.12867e-08	0.000155796	1.39492	9611
ENSMUSG00000043259	Fam13c	70440668	70558731	44.69	protein_coding	family with sequence similarity 13, member C	528.556	0.477275	0.110446	4.32133	1.55089e-05	0.00991837	1.39211	118063
ENSMUSG00000034892	Rps29	69157722	69159186	49.08	protein_coding	ribosomal protein S29	1648.7	0.476198	0.105124	4.52986	5.90215e-06	0.00651973	1.39107	1464
ENSMUSG00000024847	Aip	4114446	4125858	49.41	protein_coding	aryl-hydrocarbon receptor-interacting protein	148.747	0.47435	0.117534	4.03584	5.44063e-05	0.0287431	1.38929	11412
ENSMUSG00000050608	Minos1	139101814	139131113	46.51	protein_coding	mitochondrial inner membrane organizing system 1	541.295	0.468163	0.105848	4.42297	9.73549e-06	0.0078864	1.38335	29299
ENSMUSG00000046516	Cox17	38346991	38352763	44.64	protein_coding	cytochrome c oxidase assembly protein 17	351.576	0.454727	0.11638	3.90726	9.33489e-05	0.0365898	1.37052	5772
ENSMUSG00000071658	Gng3	8836929	8839246	51.98	protein_coding	guanine nucleotide binding protein (G protein), gamma 3	520.6	0.452406	0.123954	3.64979	0.000262453	0.0625307	1.36832	2317
ENSMUSG00000035621	Midn	80148272	80158368	59.78	protein_coding	midnolin	433.909	0.44639	0.117938	3.78497	0.00015373	0.0518882	1.36263	10096
ENSMUSG00000020032	Nuak1	84370905	84440597	47.97	protein_coding	NUAK family, SNF1-like kinase, 1	1086.61	0.439039	0.117497	3.7366	0.000186523	0.0566611	1.3557	69692
ENSMUSG00000016427	Ndufa1	37187588	37191163	44.55	protein_coding	NADH dehydrogenase (ubiquinone) 1 alpha subcomplex, 1	553.782	0.436743	0.109036	4.00549	6.189e-05	0.0313344	1.35354	3575
ENSMUSG00000021892	Sh3bp5	31359880	31436078	47.26	protein_coding	SH3-domain binding protein 5 (BTK-associated)	493.976	0.434998	0.098731	4.40589	1.05351e-05	0.00800077	1.35191	76198
ENSMUSG00000031608	Galnt7	57523828	57653032	43.56	protein_coding	UDP-N-acetyl-alpha-D-galactosamine: polypeptide N-acetylgalactosaminyltransferase 7	181.546	0.433614	0.111472	3.88989	0.00010029	0.0380819	1.35061	129204
ENSMUSG00000045671	Spred2	19924375	20024026	46.83	protein_coding	sprouty-related, EVH1 domain containing 2	575.959	0.426792	0.108272	3.94184	8.08595e-05	0.0338801	1.34424	99651
ENSMUSG00000021982	Cdadc1	59560896	59597836	42.42	protein_coding	cytidine and dCMP deaminase domain containing 1	396.907	0.4233	0.118927	3.55933	0.000371803	0.0821415	1.34099	36940
ENSMUSG00000019916	P4ha1	59323296	59373304	41.47	protein_coding	procollagen-proline, 2-oxoglutarate 4-dioxygenase (proline 4-hydroxylase), alpha 1 polypeptide	701.343	0.418438	0.0957375	4.37069	1.23857e-05	0.00858352	1.33648	50008
ENSMUSG00000020163	Uqcr11	80402997	80406830	52.35	protein_coding	ubiquinol-cytochrome c reductase, complex III subunit XI	823.564	0.410404	0.104975	3.90954	9.24731e-05	0.0365898	1.32906	3833
ENSMUSG00000020180	Snrpd3	75517551	75537373	44.51	protein_coding	small nuclear ribonucleoprotein D3	528.404	0.410327	0.10894	3.76653	0.000165531	0.0530115	1.32899	19822
ENSMUSG00000022247	Brix1	10474779	10485947	40.33	protein_coding	BRX1, biogenesis of ribosomes, homolog (S. cerevisiae)	209.347	0.402343	0.109004	3.6911	0.00022329	0.0593888	1.32165	11168
ENSMUSG00000042599	Kdm7a	39136623	39206789	39.33	protein_coding	lysine (K)-specific demethylase 7A	1339.9	0.384061	0.108154	3.55105	0.00038369	0.083254	1.30501	70166
ENSMUSG00000036158	Prickle1	93499114	93595891	45.21	protein_coding	prickle homolog 1 (Drosophila)	972.2	0.376309	0.107427	3.50295	0.000460144	0.0901808	1.29802	96777
ENSMUSG00000054034	Tceal5	136200948	136203876	49.4	protein_coding	transcription elongation factor A (SII)-like 5	1295.74	0.367303	0.106692	3.44266	0.000576021	0.0999891	1.28994	2928
ENSMUSG00000038967	Pdk2	95026258	95041354	52.98	protein_coding	pyruvate dehydrogenase kinase, isoenzyme 2	283.352	0.36407	0.10344	3.51964	0.000432141	0.0875292	1.28705	15096
ENSMUSG00000026078	Pdcl3	38985608	38997238	46.92	protein_coding	phosducin-like 3	269.049	0.355963	0.101488	3.50744	0.000452434	0.0901234	1.27984	11630
ENSMUSG00000040363	Bcor	12036740	12160355	51.07	protein_coding	BCL6 interacting corepressor	423.213	0.350491	0.101512	3.45272	0.000554961	0.0983957	1.27499	123615
ENSMUSG00000054302	Eapp	54670340	54695897	42.48	protein_coding	E2F-associated phosphoprotein	687.411	0.344222	0.0926886	3.71375	0.000204212	0.0593888	1.26947	25557
ENSMUSG00000038374	Rbm8a	96629928	96633779	43.46	protein_coding	RNA binding motif protein 8a	488.925	0.34412	0.0995789	3.45575	0.000548755	0.0983957	1.26938	3851
ENSMUSG00000057637	Prdm2	143107391	143212995	44.5	protein_coding	PR domain containing 2, with ZNF domain	954.943	0.342156	0.0951749	3.59502	0.000324363	0.0743649	1.26765	105604
ENSMUSG00000048458	Fam212b	105704599	105720842	49.26	protein_coding	family with sequence similarity 212, member B	762.072	0.334386	0.0904135	3.69841	0.000216957	0.0593888	1.26084	16243
ENSMUSG00000043079	Synpo	60593973	60660142	51.16	protein_coding	synaptopodin	1125.53	0.329725	0.0924684	3.56581	0.000362735	0.0816221	1.25677	66169
ENSMUSG00000048878	Hexim1	103116231	103119725	49.21	protein_coding	hexamethylene bis-acetamide inducible 1	725.477	0.32857	0.0927928	3.54089	0.000398772	0.0850085	1.25577	3494
ENSMUSG00000072872	Rybp	100228566	100287441	40.21	protein_coding	RING1 and YY1 binding protein	452.8	0.322	0.0913377	3.52538	0.000422874	0.0875292	1.25006	58875
ENSMUSG00000056091	St3gal5	72097592	72154571	45.9	protein_coding	ST3 beta-galactoside alpha-2,3-sialyltransferase 5	887.532	0.321802	0.0925069	3.47868	0.000503884	0.0971856	1.24989	56979
ENSMUSG00000033282	Rpgrip1l	91217030	91313262	39.84	protein_coding	Rpgrip1-like	644.469	0.317157	0.0861966	3.67946	0.000233729	0.0593888	1.24587	96232
ENSMUSG00000032458	Copb2	98563721	98588382	41.17	protein_coding	coatomer protein complex, subunit beta 2 (beta prime)	1293.38	0.281171	0.0811583	3.46448	0.000531258	0.0983957	1.21518	24661
ENSMUSG00000022075	Rhobtb2	69784990	69805530	49.92	protein_coding	Rho-related BTB domain containing 2	1074.35	0.280638	0.0813233	3.45089	0.000558744	0.0983957	1.21473	20540
ENSMUSG00000035805	Mlc1	88955884	88979007	47.34	protein_coding	megalencephalic leukoencephalopathy with subcortical cysts 1 homolog (human)	1192.67	-0.294743	0.0852254	-3.45839	0.000543411	0.0983957	0.815218	23123
ENSMUSG00000051451	Crebzf	90442729	90447717	44.64	protein_coding	CREB/ATF bZIP transcription factor	486.433	-0.303464	0.0819218	-3.70432	0.000211962	0.0593888	0.810304	4988
ENSMUSG00000029071	Dvl1	155847402	155859303	56.38	protein_coding	dishevelled, dsh homolog 1 (Drosophila)	579.81	-0.307101	0.088964	-3.45197	0.000556508	0.0983957	0.808264	11901
ENSMUSG00000037395	Rcor3	192098546	192138062	42.21	protein_coding	REST corepressor 3	246.216	-0.352732	0.0957385	-3.68433	0.000229305	0.0593888	0.7831	39516
ENSMUSG00000087620	5330434G04Rik	105348282	105391776	38.66	lincRNA	RIKEN cDNA 5330434G04 gene	411.151	-0.354423	0.0965894	-3.66938	0.000243138	0.0602931	0.782182	43494
ENSMUSG00000089788	Gm16586	178321108	178324171	38.32	antisense	predicted gene 16586	424.07	-0.374999	0.0999009	-3.7537	0.000174241	0.0542872	0.771106	3063
ENSMUSG00000031808	Slc27a1	71568927	71586708	52.77	protein_coding	solute carrier family 27 (fatty acid transporter), member 1	483.287	-0.381903	0.100417	-3.80318	0.000142848	0.0495927	0.767425	17781
ENSMUSG00000035967	Ddx26b	56454857	56507843	41.4	protein_coding	DEAD/H (Asp-Glu-Ala-Asp/His) box polypeptide 26B	463.059	-0.394809	0.0904499	-4.36495	1.27153e-05	0.00858352	0.76059	52986
ENSMUSG00000038181	Chpf2	24586741	24594395	56.72	protein_coding	chondroitin polymerizing factor 2	461.062	-0.396066	0.100302	-3.94872	7.85695e-05	0.0338801	0.759928	7654
ENSMUSG00000075254	Heg1	33684466	33771576	46.67	protein_coding	HEG homolog 1 (zebrafish)	415.276	-0.409351	0.111282	-3.67851	0.000234603	0.0593888	0.752962	87110
ENSMUSG00000032911	Cspg4	56865104	56899870	54.83	protein_coding	chondroitin sulfate proteoglycan 4	193.219	-0.412411	0.103305	-3.99216	6.54737e-05	0.0317928	0.751366	34766
ENSMUSG00000047676	Rpsa-ps10	150072590	150073620	55.29	protein_coding	ribosomal protein SA, pseudogene 10	1085.05	-0.414599	0.108291	-3.82857	0.000128892	0.0460636	0.750228	1030
ENSMUSG00000021268	Meg3	109541001	109571726	50.22	lincRNA	maternally expressed 3	2433.19	-0.418474	0.0934921	-4.47604	7.60419e-06	0.00710758	0.748216	30725
ENSMUSG00000103697	RP23-423B1.6	103576426	103581101	39.48	TEC		153.993	-0.430394	0.108087	-3.98193	6.83579e-05	0.0317928	0.742059	4675
ENSMUSG00000030096	Slc6a6	91684067	91759063	50.75	protein_coding	solute carrier family 6 (neurotransmitter transporter, taurine), member 6	1599.6	-0.440345	0.0885268	-4.97415	6.55359e-07	0.00132721	0.736958	74996
ENSMUSG00000004892	Bcan	87987531	88000230	56.31	protein_coding	brevican	877.444	-0.443539	0.0973057	-4.5582	5.15941e-06	0.0062692	0.735329	12699
ENSMUSG00000097023	AI854517	79500026	79534403	51.48	lincRNA	expressed sequence AI854517	182.419	-0.454952	0.114479	-3.9741	7.06448e-05	0.0317928	0.729534	34377
ENSMUSG00000102729	RP23-14P23.10	118537021	118540531	35.18	TEC		101.573	-0.45927	0.125546	-3.65816	0.000254028	0.0617338	0.727354	3510
ENSMUSG00000098202	B830012L14Rik	109695586	109702587	42.54	lincRNA	RIKEN cDNA B830012L14 gene	39.8735	-0.459314	0.130502	-3.51959	0.000432207	0.0875292	0.727332	7001
ENSMUSG00000098051	Gm27032	180894105	180895220	62.63	lincRNA	predicted gene, 27032	59.0965	-0.460149	0.127116	-3.6199	0.000294719	0.0688679	0.726911	1115
ENSMUSG00000028776	Tinagl1	130164454	130175122	54.57	protein_coding	tubulointerstitial nephritis antigen-like 1	39.7524	-0.481261	0.129684	-3.71104	0.000206408	0.0593888	0.716351	10668
ENSMUSG00000016493	Cd46	195041238	195092249	38.72	protein_coding	CD46 antigen, complement regulatory protein	43.2415	-0.488781	0.129783	-3.76615	0.000165784	0.0530115	0.712627	51011
ENSMUSG00000015647	Lama5	180176373	180225859	55.34	protein_coding	laminin, alpha 5	61.4328	-0.49859	0.129781	-3.84179	0.000122139	0.0449729	0.707798	49486
ENSMUSG00000091509	Gm17066	105109390	105114676	31.98	processed_transcript	predicted gene 17066	95.4148	-0.52532	0.124682	-4.21327	2.51705e-05	0.0145641	0.694805	5286
ENSMUSG00000035545	Leng8	4137039	4148173	53.66	protein_coding	leukocyte receptor cluster (LRC) member 8	785.369	-0.562859	0.0968174	-5.81361	6.11389e-09	3.7145e-05	0.676959	11134
ENSMUSG00000092486	2610524H06Rik	114821935	114823468	48.11	protein_coding	RIKEN cDNA 2610524H06 gene	138.934	-0.582055	0.120339	-4.83678	1.31958e-06	0.00200428	0.668012	1533

## Sheet: CON-CONsi
Ensembl Gene ID	Associated Gene Name	Gene Start (bp)	Gene End (bp)	% GC content	Gene type	Description	baseMean	log2FoldChange	lfcSE	stat	pvalue	padj	FC	Gene length
ENSMUSG00000003545	Fosb	19302721	19310045	54.95	protein_coding	FBJ osteosarcoma oncogene B	283.979	1.85896	0.157152	11.829	2.76334e-32	3.84188e-28	3.62745	7324
ENSMUSG00000023067	Cdkn1a	29090979	29100722	53.89	protein_coding	cyclin-dependent kinase inhibitor 1A (P21)	98.7085	1.18449	0.171292	6.91504	4.67719e-12	4.33513e-09	2.27284	9743
ENSMUSG00000029135	Fosl2	32136472	32157831	50.23	protein_coding	fos-like antigen 2	810.316	1.14009	0.116633	9.77507	1.44052e-22	1.00138e-18	2.20395	21359
ENSMUSG00000037868	Egr2	67535475	67542188	55.81	protein_coding	early growth response 2	196.232	1.08293	0.178221	6.07631	1.22976e-09	6.83896e-07	2.11833	6713
ENSMUSG00000007682	Dio2	90724554	90738438	42.09	protein_coding	deiodinase, iodothyronine, type II	2103.22	1.04653	0.129859	8.05897	7.6942e-16	1.78287e-12	2.06555	13884
ENSMUSG00000055866	Per2	91415982	91459324	51.23	protein_coding	period circadian clock 2	641.417	1.00705	0.117589	8.56414	1.08883e-17	3.0276e-14	2.0098	43342
ENSMUSG00000022769	Sdf2l1	17130138	17132383	55.61	protein_coding	stromal cell-derived factor 2-like 1	60.8219	1.0026	0.167843	5.97345	2.32283e-09	1.15337e-06	2.00361	2245
ENSMUSG00000035021	Baz1a	54892989	55014348	42.12	protein_coding	bromodomain adjacent to zinc finger domain 1A	120.56	0.967032	0.171771	5.62978	1.80435e-08	5.83394e-06	1.95481	121359
ENSMUSG00000049649	Gpr3	133209340	133212536	56.43	protein_coding	G-protein coupled receptor 3	104.441	0.954385	0.168816	5.6534	1.573e-08	5.48771e-06	1.93775	3196
ENSMUSG00000031431	Tsc22d3	140539528	140600659	43.57	protein_coding	TSC22 domain family, member 3	974.828	0.929857	0.122908	7.56548	3.86438e-14	6.71581e-11	1.90509	61131
ENSMUSG00000007617	Homer1	93303757	93404129	37.92	protein_coding	homer homolog 1 (Drosophila)	6875.28	0.929835	0.14451	6.43439	1.23972e-10	9.0715e-08	1.90506	100372
ENSMUSG00000034738	Nostrin	69135800	69189330	42.58	protein_coding	nitric oxide synthase trafficker	63.014	0.923949	0.163694	5.64438	1.6578e-08	5.48771e-06	1.8973	53530
ENSMUSG00000038418	Egr1	34859823	34864984	57.77	protein_coding	early growth response 1	1733.26	0.906466	0.151203	5.99504	2.0344e-09	1.08786e-06	1.87445	5161
ENSMUSG00000067279	Ppp1r3c	36731737	36736653	43.64	protein_coding	protein phosphatase 1, regulatory (inhibitor) subunit 3C	1435.82	0.884364	0.0948802	9.32086	1.15405e-20	5.34826e-17	1.84595	4916
ENSMUSG00000025316	Banp	121949750	122029258	50.13	protein_coding	BTG3 associated nuclear protein	352.198	0.86661	0.110584	7.83669	4.62564e-15	9.18717e-12	1.82337	79508
ENSMUSG00000031530	Dusp4	34807297	34819894	51.87	protein_coding	dual specificity phosphatase 4	216.568	0.863113	0.119653	7.21345	5.4552e-13	7.58436e-10	1.81896	12597
ENSMUSG00000021250	Fos	85473890	85477273	53.13	protein_coding	FBJ osteosarcoma oncogene	281.862	0.861217	0.171814	5.01249	5.37296e-07	0.000106875	1.81657	3383
ENSMUSG00000090877	Hspa1b	34956436	34959238	58.12	protein_coding	heat shock protein 1B	149.729	0.860424	0.178912	4.8092	1.51534e-06	0.000239407	1.81557	2802
ENSMUSG00000028862	Map3k6	133240818	133252929	55.28	protein_coding	mitogen-activated protein kinase kinase kinase 6	26.5415	0.848538	0.176534	4.80666	1.53476e-06	0.00023975	1.80068	12111
ENSMUSG00000024042	Sik1	31844248	31855792	53.92	protein_coding	salt inducible kinase 1	239.96	0.841086	0.134174	6.26861	3.64275e-10	2.30205e-07	1.7914	11544
ENSMUSG00000002831	Plin4	56100591	56109803	55.19	protein_coding	perilipin 4	48.9431	0.838026	0.179803	4.66079	3.14999e-06	0.000428178	1.7876	9212
ENSMUSG00000005483	Dnajb1	83608175	83611902	53.33	protein_coding	DnaJ (Hsp40) homolog, subfamily B, member 1	612.697	0.835893	0.133224	6.27435	3.51095e-10	2.30205e-07	1.78496	3727
ENSMUSG00000091971	Hspa1a	34969190	34972156	58.95	protein_coding	heat shock protein 1A	85.8855	0.835647	0.171061	4.88509	1.03384e-06	0.000177451	1.78466	2966
ENSMUSG00000028341	Nr4a3	48045153	48086447	46.08	protein_coding	nuclear receptor subfamily 4, group A, member 3	746.432	0.824778	0.124483	6.62562	3.45805e-11	2.67096e-08	1.77126	41294
ENSMUSG00000048482	Bdnf	109674700	109727007	40.8	protein_coding	brain derived neurotrophic factor	749.587	0.821164	0.110072	7.46024	8.6363e-14	1.33412e-10	1.76683	52307
ENSMUSG00000024014	Pim1	29490812	29496111	52.74	protein_coding	proviral integration site 1	66.7128	0.817505	0.143053	5.7147	1.09897e-08	4.24415e-06	1.76236	5299
ENSMUSG00000059991	Nptx2	144545887	144557478	51.98	protein_coding	neuronal pentraxin 2	428.796	0.814079	0.153533	5.30232	1.14343e-07	2.59081e-05	1.75818	11591
ENSMUSG00000016624	Phf21b	84785381	84856049	51.24	protein_coding	PHD finger protein 21B	175.162	0.810418	0.163243	4.96448	6.88839e-07	0.000127692	1.75372	70668
ENSMUSG00000008384	Sertad1	27486910	27490316	55.83	protein_coding	SERTA domain containing 1	76.1766	0.809963	0.162262	4.9917	5.9849e-07	0.000117117	1.75317	3406
ENSMUSG00000000531	Grasp	101224207	101232755	55.66	protein_coding	GRP1 (general receptor for phosphoinositides 1)-associated scaffold protein	563.023	0.800508	0.13564	5.90171	3.5976e-09	1.66725e-06	1.74171	8548
ENSMUSG00000023272	Creld2	88819646	88826681	53.75	protein_coding	cysteine-rich with EGF-like domains 2	194.307	0.791946	0.143096	5.53437	3.12345e-08	9.44029e-06	1.73141	7035
ENSMUSG00000004951	Hspb1	135887919	135889563	59.64	protein_coding	heat shock protein 1	39.9055	0.778941	0.175498	4.43845	9.06078e-06	0.000982007	1.71587	1644
ENSMUSG00000021587	Pcsk1	75089826	75132498	38.6	protein_coding	proprotein convertase subtilisin/kexin type 1	920.599	0.760383	0.111456	6.82225	8.96269e-12	7.78802e-09	1.69394	42672
ENSMUSG00000050423	Ppp1r3g	35958839	35970388	46.26	protein_coding	protein phosphatase 1, regulatory (inhibitor) subunit 3G	113.873	0.748496	0.162525	4.60541	4.11653e-06	0.000520291	1.68004	11549
ENSMUSG00000026864	Hspa5	34771970	34777547	44.42	protein_coding	heat shock protein 5	5294.96	0.748251	0.105589	7.08644	1.37602e-12	1.59423e-09	1.67976	5577
ENSMUSG00000023905	Tnfrsf12a	23675447	23677449	57.46	protein_coding	tumor necrosis factor receptor superfamily, member 12a	42.8949	0.745534	0.17538	4.25096	2.12857e-05	0.00179354	1.67659	2002
ENSMUSG00000036052	Dnajb5	42949814	42959425	54.02	protein_coding	DnaJ (Hsp40) homolog, subfamily B, member 5	950.418	0.740904	0.136172	5.44093	5.30034e-08	1.39039e-05	1.67122	9611
ENSMUSG00000045314	Sowahb	93041123	93045022	54.67	protein_coding	sosondowah ankyrin repeat domain family member B	289.817	0.738537	0.159543	4.62909	3.67276e-06	0.0004742	1.66848	3899
ENSMUSG00000022237	Ankrd33b	31291479	31367759	47.65	protein_coding	ankyrin repeat domain 33B	1742.75	0.737736	0.129633	5.69098	1.26316e-08	4.74641e-06	1.66756	76280
ENSMUSG00000020484	Xbp1	5520659	5525893	51.19	protein_coding	X-box binding protein 1	871.444	0.731254	0.123568	5.91781	3.26251e-09	1.56409e-06	1.66008	5234
ENSMUSG00000051703	Tmem198	75479532	75485705	54.31	protein_coding	transmembrane protein 198	413.754	0.726865	0.132959	5.46685	4.58103e-08	1.24882e-05	1.65504	6173
ENSMUSG00000019916	P4ha1	59323296	59373304	41.47	protein_coding	procollagen-proline, 2-oxoglutarate 4-dioxygenase (proline 4-hydroxylase), alpha 1 polypeptide	1087.67	0.715867	0.0995882	7.18827	6.56173e-13	8.29342e-10	1.64247	50008
ENSMUSG00000033730	Egr3	70077445	70080157	64.54	protein_coding	early growth response 3	441.398	0.713172	0.171898	4.1488	3.34224e-05	0.00249823	1.6394	2712
ENSMUSG00000028214	Gem	11704457	11714752	45.46	protein_coding	GTP binding protein (gene overexpressed in skeletal muscle)	41.6672	0.712625	0.178297	3.99685	6.41901e-05	0.00409374	1.63878	10295
ENSMUSG00000075602	Ly6a	74994877	74998031	48.87	protein_coding	lymphocyte antigen 6 complex, locus A	121.202	0.7106	0.163638	4.34252	1.4086e-05	0.00133033	1.63648	3154
ENSMUSG00000103753	RP24-490B17.3	51832819	51834723	55.59	TEC		21.8119	0.710586	0.169576	4.19036	2.7851e-05	0.0021632	1.63647	1904
ENSMUSG00000041324	Inhba	16011851	16027211	45.35	protein_coding	inhibin beta-A	86.2068	0.701479	0.173816	4.03577	5.44247e-05	0.00353582	1.62617	15360
ENSMUSG00000021750	Fam107a	8296274	8318023	48.23	protein_coding	family with sequence similarity 107, member A	4749.87	0.683077	0.151587	4.50616	6.60118e-06	0.000752264	1.60556	21749
ENSMUSG00000037112	Sik2	50892801	51009073	39.99	protein_coding	salt inducible kinase 2	683.726	0.681842	0.120755	5.6465	1.63748e-08	5.48771e-06	1.60419	116272
ENSMUSG00000022602	Arc	74669083	74672570	58.8	protein_coding	activity regulated cytoskeletal-associated protein	2345.33	0.674952	0.176505	3.82398	0.000131314	0.00694166	1.59654	3487
ENSMUSG00000036896	C1qc	136889804	136893065	55.12	protein_coding	complement component 1, q subcomponent, C chain	127.316	0.674789	0.138007	4.88952	1.0108e-06	0.000175664	1.59636	3261
ENSMUSG00000040957	Cables1	11839220	11945627	48.4	protein_coding	CDK5 and Abl enzyme substrate 1	214.854	0.673691	0.115766	5.81944	5.9045e-09	2.48759e-06	1.59515	106407
ENSMUSG00000040363	Bcor	12036740	12160355	51.07	protein_coding	BCL6 interacting corepressor	541.086	0.669777	0.121603	5.5079	3.63138e-08	1.05181e-05	1.59083	123615
ENSMUSG00000034275	Igsf9b	27299228	27334763	51.62	protein_coding	immunoglobulin superfamily, member 9B	392.377	0.668203	0.155056	4.30944	1.63665e-05	0.00148722	1.58909	35535
ENSMUSG00000005124	Wisp1	66891320	66923201	46.87	protein_coding	WNT1 inducible signaling pathway protein 1	37.1557	0.663446	0.179757	3.6908	0.000223548	0.0105295	1.58386	31881
ENSMUSG00000032380	Dapk2	66158223	66272242	47.04	protein_coding	death-associated protein kinase 2	16.2516	0.658732	0.172369	3.82164	0.000132569	0.00698149	1.57869	114019
ENSMUSG00000018648	Dusp14	84048041	84069261	47.18	protein_coding	dual specificity phosphatase 14	583.688	0.655169	0.158915	4.12276	3.74361e-05	0.0027108	1.5748	21220
ENSMUSG00000031770	Herpud1	94386438	94395377	46.98	protein_coding	homocysteine-inducible, endoplasmic reticulum stress-inducible, ubiquitin-like domain member 1	507.577	0.651979	0.139139	4.68582	2.78836e-06	0.000387665	1.57132	8939
ENSMUSG00000015312	Gadd45b	80930091	80932204	57.76	protein_coding	growth arrest and DNA-damage-inducible 45 beta	82.7042	0.649305	0.146574	4.42988	9.42847e-06	0.000997493	1.56841	2113
ENSMUSG00000021765	Fst	114452262	114458730	46.65	protein_coding	follistatin	43.5549	0.646301	0.177047	3.65044	0.000261793	0.0116454	1.56515	6468
ENSMUSG00000089762	Ier5l	30471537	30474219	63.85	protein_coding	immediate early response 5-like	67.5809	0.639294	0.164572	3.88459	0.000102502	0.00584053	1.55757	2682
ENSMUSG00000032846	Zswim6	107724618	107890064	42.78	protein_coding	zinc finger SWIM-type containing 6	598.934	0.639158	0.122641	5.2116	1.87215e-07	4.06695e-05	1.55742	165446
ENSMUSG00000017418	Arl5b	15049395	15082456	39.9	protein_coding	ADP-ribosylation factor-like 5B	556.117	0.638559	0.116146	5.4979	3.84334e-08	1.09049e-05	1.55677	33061
ENSMUSG00000063889	Crem	3266048	3337748	38.63	protein_coding	cAMP responsive element modulator	217.05	0.638288	0.130768	4.88106	1.05518e-06	0.000178905	1.55648	71700
ENSMUSG00000025290	Rps24	24490681	24496146	45.43	protein_coding	ribosomal protein S24	2171.4	0.637411	0.129595	4.9185	8.72119e-07	0.00015545	1.55553	5465
ENSMUSG00000000489	Pdgfb	79995900	80014808	55.41	protein_coding	platelet derived growth factor, B polypeptide	181.917	0.63677	0.114462	5.56317	2.64911e-08	8.18456e-06	1.55484	18908
ENSMUSG00000028655	Mfsd2a	122946850	122961188	51.06	protein_coding	major facilitator superfamily domain containing 2A	174.361	0.633556	0.148866	4.25588	2.08232e-05	0.00176528	1.55138	14338
ENSMUSG00000038894	Irs2	10986980	11008458	49.77	protein_coding	insulin receptor substrate 2	536.248	0.629711	0.140751	4.47394	7.67897e-06	0.000860974	1.54725	21478
ENSMUSG00000019960	Dusp6	99263231	99267488	47.51	protein_coding	dual specificity phosphatase 6	1005.23	0.62641	0.142759	4.3879	1.1445e-05	0.00117443	1.54372	4257
ENSMUSG00000036073	Galt	41755228	41758695	54.56	protein_coding	galactose-1-phosphate uridyl transferase	227.364	0.6248	0.175771	3.55461	0.000378534	0.0153882	1.542	3467
ENSMUSG00000071341	Egr4	85511131	85513589	68.48	protein_coding	early growth response 4	56.3888	0.623036	0.169497	3.6758	0.000237102	0.0109516	1.54011	2458
ENSMUSG00000051590	Map3k19	127815253	127840321	44.19	protein_coding	mitogen-activated protein kinase kinase kinase 19	200.76	0.619865	0.129595	4.7831	1.72613e-06	0.000263718	1.53673	25068
ENSMUSG00000035621	Midn	80148272	80158368	59.78	protein_coding	midnolin	546.809	0.616557	0.135503	4.55012	5.36155e-06	0.0006264	1.53321	10096
ENSMUSG00000051335	Gfod1	43195519	43304172	47.51	protein_coding	glucose-fructose oxidoreductase domain containing 1	1918.83	0.616472	0.105454	5.84588	5.03888e-09	2.18924e-06	1.53312	108653
ENSMUSG00000055044	Pdlim1	40221173	40271842	44.55	protein_coding	PDZ and LIM domain 1 (elfin)	41.2182	0.607779	0.175545	3.46224	0.000535705	0.0197633	1.52391	50669
ENSMUSG00000066687	Zbtb16	48654311	48835945	48.33	protein_coding	zinc finger and BTB domain containing 16	1288.72	0.607322	0.133213	4.55902	5.13935e-06	0.000610704	1.52343	181634
ENSMUSG00000055818	A230083G16Rik	124916863	124925844	50.51	protein_coding	RIKEN cDNA A230083G16 gene	23.1257	0.607013	0.176422	3.44069	0.000580227	0.020953	1.5231	8981
ENSMUSG00000032528	Vipr1	121642716	121672954	52.94	protein_coding	vasoactive intestinal peptide receptor 1	312.992	0.606775	0.107407	5.64928	1.61118e-08	5.48771e-06	1.52285	30238
ENSMUSG00000049225	Pdp1	11958184	11966452	40.05	protein_coding	pyruvate dehyrogenase phosphatase catalytic subunit 1	2349.48	0.606089	0.162314	3.73406	0.000188416	0.00925636	1.52213	8268
ENSMUSG00000031609	Sap30	57482707	57487860	41.19	protein_coding	sin3 associated polypeptide	61.7481	0.600973	0.155194	3.8724	0.000107771	0.00600549	1.51674	5153
ENSMUSG00000039195	1110008P14Rik	32377097	32381938	55.53	protein_coding	RIKEN cDNA 1110008P14 gene	944.487	0.596114	0.163411	3.64795	0.000264343	0.0117043	1.51164	4841
ENSMUSG00000073888	Ccl27a	41769467	41774247	52.27	protein_coding	chemokine (C-C motif) ligand 27A	417.992	0.593315	0.175557	3.37962	0.000725859	0.0244942	1.50871	4780
ENSMUSG00000035226	Rims4	163859751	163918683	50.61	protein_coding	regulating synaptic membrane exocytosis 4	1296.49	0.593249	0.110503	5.36863	7.9339e-08	1.90181e-05	1.50864	58932
ENSMUSG00000001627	Ifrd1	40201567	40248504	41.54	protein_coding	interferon-related developmental regulator 1	550.264	0.589689	0.101699	5.79838	6.69576e-09	2.73798e-06	1.50492	46937
ENSMUSG00000036915	Kirrel2	30447534	30457690	51.33	protein_coding	kin of IRRE like 2 (Drosophila)	45.8254	0.583516	0.176427	3.30741	0.000941615	0.0293403	1.4985	10156
ENSMUSG00000030235	Slco1c1	141524386	141570177	39.57	protein_coding	solute carrier organic anion transporter family, member 1c1	1143.93	0.582182	0.150673	3.86388	0.000111599	0.00608457	1.49711	45791
ENSMUSG00000020601	Trib2	15791727	15816877	46.68	protein_coding	tribbles homolog 2 (Drosophila)	1050.69	0.577313	0.0662556	8.71343	2.94824e-18	1.02473e-14	1.49207	25150
ENSMUSG00000026205	Slc23a3	75125541	75133890	48.66	protein_coding	solute carrier family 23 (nucleobase transporters), member 3	16.3278	0.576055	0.178721	3.2232	0.00126767	0.0350112	1.49077	8349
ENSMUSG00000048458	Fam212b	105704599	105720842	49.26	protein_coding	family with sequence similarity 212, member B	1031.44	0.575397	0.13519	4.25621	2.07924e-05	0.00176528	1.49009	16243
ENSMUSG00000056501	Cebpb	167688915	167690418	67.15	protein_coding	CCAAT/enhancer binding protein (C/EBP), beta	42.0336	0.569755	0.169105	3.36924	0.000753758	0.0251307	1.48427	1503
ENSMUSG00000020893	Per1	69095217	69109960	55.26	protein_coding	period circadian clock 1	627.252	0.569693	0.135581	4.20188	2.64707e-05	0.00210999	1.48421	14743
ENSMUSG00000020482	Ccdc117	5528887	5542187	45.12	protein_coding	coiled-coil domain containing 117	275.216	0.568521	0.122017	4.65935	3.17214e-06	0.000428178	1.483	13300
ENSMUSG00000032575	Manf	106838312	106891979	43.69	protein_coding	mesencephalic astrocyte-derived neurotrophic factor	393.681	0.566723	0.11374	4.98263	6.27251e-07	0.000119461	1.48116	53667
ENSMUSG00000032515	Csrnp1	119971166	119977250	51.55	protein_coding	cysteine-serine-rich nuclear protein 1	53.7648	0.56646	0.173145	3.27159	0.00106944	0.0319752	1.48089	6084
ENSMUSG00000038059	Smim3	60474193	60501983	45.68	protein_coding	small integral membrane protein 3	65.9403	0.56607	0.151819	3.72859	0.000192552	0.00936034	1.48048	27790
ENSMUSG00000050592	Fam78a	32050055	32084857	52.49	protein_coding	family with sequence similarity 78, member A	49.0742	0.566056	0.165799	3.41412	0.000639889	0.022452	1.48047	34802
ENSMUSG00000068114	Ccdc134	82127922	82142200	49.21	protein_coding	coiled-coil domain containing 134	50.638	0.558988	0.16444	3.39934	0.000675496	0.0232461	1.47324	14278
ENSMUSG00000031758	Cdyl2	116568724	116732991	45.37	protein_coding	chromodomain protein, Y chromosome-like 2	418.404	0.557436	0.130374	4.27566	1.9057e-05	0.00167132	1.47165	164267
ENSMUSG00000053137	Mapk11	89142486	89149606	55.99	protein_coding	mitogen-activated protein kinase 11	284.388	0.557073	0.148612	3.74851	0.000177887	0.00880129	1.47128	7120
ENSMUSG00000056749	Nfil3	52967209	52981073	48.93	protein_coding	nuclear factor, interleukin 3, regulated	102.897	0.555139	0.124972	4.44209	8.90888e-06	0.000975276	1.46931	13864
ENSMUSG00000009633	G0s2	193272161	193273217	57.24	protein_coding	G0/G1 switch gene 2	37.7993	0.553059	0.164149	3.36926	0.000753701	0.0251307	1.46719	1056
ENSMUSG00000035711	Dok3	55523235	55528538	53.96	protein_coding	docking protein 3	22.8191	0.551084	0.177418	3.10614	0.0018955	0.0442132	1.46519	5303
ENSMUSG00000062563	Cys1	24665838	24681813	49.04	protein_coding	cystin 1	55.6208	0.549556	0.157572	3.48766	0.000487272	0.018766	1.46364	15975
ENSMUSG00000071516	Hist1h2ai	21716422	21716814	69.97	protein_coding	histone cluster 1, H2ai	17.0005	0.545061	0.17635	3.0908	0.00199621	0.0451999	1.45908	392
ENSMUSG00000037279	Ovol2	144305175	144332146	47.5	protein_coding	ovo-like 2 (Drosophila)	41.8492	0.545058	0.169913	3.20786	0.00133725	0.0356973	1.45908	26971
ENSMUSG00000097785	B230217O12Rik	57323385	57360775	46	lincRNA	RIKEN cDNA B230217O12 gene	65.7966	0.545	0.176538	3.08716	0.00202081	0.0453381	1.45902	37390
ENSMUSG00000016179	Camk1g	193346346	193370298	49.61	protein_coding	calcium/calmodulin-dependent protein kinase I gamma	314.934	0.544345	0.128614	4.23238	2.3123e-05	0.00192503	1.45836	23952
ENSMUSG00000044881	Coa4	100537100	100540369	45.75	protein_coding	cytochrome c oxidase assembly factor 4	35.6024	0.543844	0.163715	3.32189	0.000894108	0.0284457	1.45785	3269
ENSMUSG00000034832	Tet3	83362373	83459084	49.16	protein_coding	tet methylcytosine dioxygenase 3	977.839	0.542618	0.136495	3.97537	7.02706e-05	0.00433325	1.45661	96711
ENSMUSG00000060477	Irak2	113638467	113695009	48.33	protein_coding	interleukin-1 receptor-associated kinase 2	161.675	0.541337	0.109351	4.95043	7.40481e-07	0.0001337	1.45532	56542
ENSMUSG00000030792	Dkkl1	45207525	45211883	50.01	protein_coding	dickkopf-like 1	153.452	0.540761	0.174121	3.10566	0.00189853	0.0442132	1.45474	4358
ENSMUSG00000033863	Klf9	23141226	23166911	47.56	protein_coding	Kruppel-like factor 9	2930.06	0.537544	0.130364	4.12341	3.73308e-05	0.0027108	1.4515	25685
ENSMUSG00000036106	Prr5	84669620	84703673	54.16	protein_coding	proline rich 5 (renal)	24.2611	0.536629	0.172485	3.11116	0.00186352	0.0439127	1.45058	34053
ENSMUSG00000029177	Cenpa	30666777	30674827	46.84	protein_coding	centromere protein A	15.9655	0.536419	0.179951	2.98092	0.00287387	0.0555708	1.45037	8050
ENSMUSG00000025402	Nab2	127660918	127668568	58.23	protein_coding	Ngfi-A binding protein 2	414.188	0.536346	0.14828	3.61711	0.000297908	0.0129029	1.45029	7650
ENSMUSG00000047904	Sstr2	113619342	113626028	50.73	protein_coding	somatostatin receptor 2	278.07	0.533497	0.124795	4.275	1.91139e-05	0.00167132	1.44743	6686
ENSMUSG00000013089	Etv5	22381309	22439719	46.37	protein_coding	ets variant 5	1025.42	0.533003	0.126358	4.21819	2.46274e-05	0.00202601	1.44694	58410
ENSMUSG00000031880	Rrad	104628066	104631321	54.12	protein_coding	Ras-related associated with diabetes	24.203	0.531717	0.178644	2.97641	0.00291642	0.0562372	1.44565	3255
ENSMUSG00000070637	Gm694	141432672	141436105	49.56	protein_coding	predicted gene 694	25.2976	0.531185	0.173894	3.05465	0.00225326	0.0487201	1.44512	3433
ENSMUSG00000025856	Pdgfa	138976014	138997370	54.91	protein_coding	platelet derived growth factor, alpha	521.175	0.528772	0.140986	3.75052	0.000176468	0.00876226	1.4427	21356
ENSMUSG00000069117	Gm10260	97760130	97760588	54.47	protein_coding	predicted gene 10260	131.906	0.526764	0.157878	3.33653	0.000848327	0.0272385	1.44069	458
ENSMUSG00000030103	Bhlhe40	108660629	108666925	47.28	protein_coding	basic helix-loop-helix family, member e40	902.446	0.524241	0.137963	3.79985	0.000144782	0.00742769	1.43818	6296
ENSMUSG00000027351	Spred1	117121374	117182279	37.86	protein_coding	sprouty protein with EVH-1 domain 1, related sequence	4970.21	0.522332	0.0965641	5.40917	6.33166e-08	1.57778e-05	1.43628	60905
ENSMUSG00000030199	Etv6	134035700	134270158	45.58	protein_coding	ets variant 6	403.093	0.519105	0.154798	3.35343	0.000798163	0.0262833	1.43307	234458
ENSMUSG00000028480	Glipr2	43957401	43979118	49.83	protein_coding	GLI pathogenesis-related 2	47.4995	0.518112	0.169875	3.04995	0.00228876	0.0490778	1.43208	21717
ENSMUSG00000032280	Tle3	61372366	61418497	52.22	protein_coding	transducin-like enhancer of split 3, homolog of Drosophila E(spl)	506.256	0.518048	0.113983	4.54496	5.49445e-06	0.000636577	1.43202	46131
ENSMUSG00000017144	Rnd3	51130438	51149111	43.97	protein_coding	Rho family GTPase 3	487.719	0.517636	0.173245	2.98789	0.00280909	0.0546928	1.43161	18673
ENSMUSG00000004661	Arid3b	57790353	57836793	46.71	protein_coding	AT rich interactive domain 3B (BRIGHT-like)	85.4982	0.516323	0.179695	2.87333	0.00406174	0.069204	1.43031	46440
ENSMUSG00000035314	Gdpd5	99381549	99460983	52.62	protein_coding	glycerophosphodiester phosphodiesterase domain containing 5	211.666	0.513605	0.115523	4.4459	8.7524e-06	0.000965751	1.42761	79434
ENSMUSG00000092368	A930015D03Rik	35994453	36038435	46.83	antisense	RIKEN cDNA A930015D03 gene	78.6552	0.513511	0.148123	3.46678	0.000526727	0.0197633	1.42752	43982
ENSMUSG00000030168	Adipor2	119353150	119417704	43.93	protein_coding	adiponectin receptor 2	583.37	0.513357	0.109207	4.70076	2.59199e-06	0.000367719	1.42737	64554
ENSMUSG00000032840	2410131K14Rik	118245227	118266093	50.55	protein_coding	RIKEN cDNA 2410131K14 gene	320.295	0.507226	0.093783	5.40851	6.35514e-08	1.57778e-05	1.42131	20866
ENSMUSG00000042608	Stk40	126103957	126141029	50.77	protein_coding	serine/threonine kinase 40	240.261	0.504902	0.130365	3.87298	0.000107511	0.00600549	1.41903	37072
ENSMUSG00000052305	Hbb-bs	103826534	103828096	46.51	protein_coding	hemoglobin, beta adult s chain	875.05	0.503869	0.132922	3.79072	0.000150211	0.00764977	1.41801	1562
ENSMUSG00000045498	Pcdhb3	37300799	37304585	45.29	protein_coding	protocadherin beta 3	79.8657	0.503827	0.161209	3.1253	0.00177625	0.0427251	1.41797	3786
ENSMUSG00000056708	Ier5	155096361	155099636	52.29	protein_coding	immediate early response 5	467.725	0.503247	0.172225	2.92202	0.00347764	0.0632851	1.4174	3275
ENSMUSG00000025823	Pdia4	47796142	47813512	45.79	protein_coding	protein disulfide isomerase associated 4	1155.15	0.502683	0.0890582	5.64443	1.6573e-08	5.48771e-06	1.41685	17370
ENSMUSG00000023232	Serinc2	130253495	130279205	51.23	protein_coding	serine incorporator 2	23.6198	0.502643	0.179097	2.80655	0.00500753	0.0786664	1.41681	25710
ENSMUSG00000034271	Jdp2	85599105	85639878	50.33	protein_coding	Jun dimerization protein 2	303.811	0.502606	0.154546	3.25215	0.00114536	0.0332583	1.41677	40773
ENSMUSG00000030898	Cckbr	105425817	105470898	43.07	protein_coding	cholecystokinin B receptor	560.399	0.502387	0.143042	3.51216	0.00044448	0.0174074	1.41656	45081
ENSMUSG00000042328	Hps4	112343083	112378414	52.26	protein_coding	Hermansky-Pudlak syndrome 4 homolog (human)	111.235	0.501996	0.136274	3.68373	0.000229844	0.0106575	1.41617	35331
ENSMUSG00000035873	Pawr	108332189	108414391	43.86	protein_coding	PRKC, apoptosis, WT1, regulator	39.503	0.501431	0.167494	2.99373	0.00275592	0.0540779	1.41562	82202
ENSMUSG00000036492	Rnf39	36942918	36947986	53.66	protein_coding	ring finger protein 39	38.8409	0.499941	0.176578	2.83127	0.00463631	0.0746638	1.41416	5068
ENSMUSG00000066042	Med18	132458731	132463921	46.06	protein_coding	mediator complex subunit 18	49.1526	0.4999	0.153381	3.2592	0.00111727	0.0329605	1.41412	5190
ENSMUSG00000029544	Cabp1	115168689	115194381	52.25	protein_coding	calcium binding protein 1	504.912	0.498458	0.168947	2.95038	0.00317385	0.0597104	1.4127	25692
ENSMUSG00000020076	Ddx50	62616023	62651218	38.77	protein_coding	DEAD (Asp-Glu-Ala-Asp) box polypeptide 50	956.528	0.497279	0.0742461	6.69771	2.11707e-11	1.73139e-08	1.41155	35195
ENSMUSG00000028645	Slc2a1	119108711	119137330	51.24	protein_coding	solute carrier family 2 (facilitated glucose transporter), member 1	857.693	0.496191	0.143294	3.46275	0.00053468	0.0197633	1.41049	28619
ENSMUSG00000022136	Dnajc3	118937932	118981702	43.19	protein_coding	DnaJ (Hsp40) homolog, subfamily C, member 3	1313.89	0.493685	0.0809748	6.09677	1.08233e-09	6.26982e-07	1.40804	43770
ENSMUSG00000060862	Zbtb40	136979732	137048801	48.39	protein_coding	zinc finger and BTB domain containing 40	177.243	0.491817	0.11378	4.32253	1.54252e-05	0.00142025	1.40622	69069
ENSMUSG00000034936	Arl4d	101665541	101667832	53.58	protein_coding	ADP-ribosylation factor-like 4D	81.9821	0.491722	0.158951	3.09354	0.00197782	0.0451522	1.40612	2291
ENSMUSG00000096847	Tmem151b	45541940	45549677	57.39	protein_coding	transmembrane protein 151B	2263.8	0.489989	0.110634	4.42892	9.47055e-06	0.000997493	1.40443	7737
ENSMUSG00000024558	Mapk4	73928486	74065359	47.25	protein_coding	mitogen-activated protein kinase 4	1160.89	0.488965	0.103783	4.7114	2.46022e-06	0.000356297	1.40344	136873
ENSMUSG00000024736	Tmem132a	10857822	10869940	54.57	protein_coding	transmembrane protein 132A	2346.31	0.487796	0.0882876	5.52508	3.29332e-08	9.74192e-06	1.4023	12118
ENSMUSG00000042429	Adora1	134199223	134235431	51.17	protein_coding	adenosine A1 receptor	2541.56	0.486093	0.127836	3.80247	0.000143262	0.00737693	1.40065	36208
ENSMUSG00000055805	Fmnl1	103171107	103198901	53.19	protein_coding	formin-like 1	677.783	0.484097	0.137251	3.52709	0.000420159	0.0166423	1.39871	27794
ENSMUSG00000097391	Mirg	109729764	109749460	48.68	lincRNA	miRNA containing gene	493.701	0.484005	0.172623	2.80383	0.00504994	0.0791536	1.39862	19696
ENSMUSG00000020038	Cry1	85131702	85185054	40.79	protein_coding	cryptochrome 1 (photolyase-like)	223.099	0.482112	0.118697	4.06171	4.87152e-05	0.00328781	1.39679	53352
ENSMUSG00000001774	Chordc1	18292267	18314000	38.39	protein_coding	cysteine and histidine-rich domain (CHORD)-containing, zinc-binding protein 1	1150.75	0.482052	0.101579	4.74558	2.07913e-06	0.000307512	1.39673	21733
ENSMUSG00000048285	Frmd6	70825514	70902232	44.67	protein_coding	FERM domain containing 6	544.346	0.481661	0.167734	2.87157	0.00408434	0.069334	1.39635	76718
ENSMUSG00000053470	Kdm3a	71588974	71632905	40.06	protein_coding	lysine (K)-specific demethylase 3A	578.304	0.480179	0.118964	4.03636	5.42877e-05	0.00353582	1.39492	43931
ENSMUSG00000101188	Eif4a-ps4	60703932	60705149	48.6	processed_pseudogene	eukaryotic translation initiation factor 4A, pseudogene 4	200.642	0.477766	0.165717	2.88303	0.00393871	0.0677721	1.39259	1217
ENSMUSG00000039646	Vasn	4639941	4650802	54.8	protein_coding	vasorin	76.0502	0.475892	0.175928	2.70504	0.00682963	0.0965525	1.39078	10861
ENSMUSG00000044317	Gpr4	19212538	19224176	50.39	protein_coding	G protein-coupled receptor 4	26.0073	0.474423	0.17458	2.71751	0.0065775	0.0942752	1.38936	11638
ENSMUSG00000001128	Cfp	20925454	20931555	47.82	protein_coding	complement factor properdin	31.7787	0.474241	0.17596	2.69516	0.00703553	0.0984054	1.38919	6101
ENSMUSG00000018906	P4ha2	54100095	54131665	49.82	protein_coding	procollagen-proline, 2-oxoglutarate 4-dioxygenase (proline 4-hydroxylase), alpha II polypeptide	124.449	0.473164	0.150139	3.15151	0.00162429	0.040398	1.38815	31570
ENSMUSG00000029657	Hsph1	149614287	149636376	45.5	protein_coding	heat shock 105kDa/110kDa protein 1	5842.84	0.473073	0.0937848	5.04424	4.55326e-07	9.3094e-05	1.38806	22089
ENSMUSG00000023019	Gpd1	99717515	99725005	54.69	protein_coding	glycerol-3-phosphate dehydrogenase 1 (soluble)	772.671	0.472286	0.159872	2.95415	0.00313535	0.0592839	1.38731	7490
ENSMUSG00000028060	2810403A07Rik	88685794	88712933	41.5	protein_coding	RIKEN cDNA 2810403A07 gene	658.992	0.469285	0.122499	3.83092	0.000127666	0.00680056	1.38442	27139
ENSMUSG00000029817	Tra2a	49243921	49264052	40.47	protein_coding	transformer 2 alpha homolog (Drosophila)	661.498	0.468785	0.101111	4.63636	3.54604e-06	0.0004651	1.38394	20131
ENSMUSG00000023805	Synj2	5941280	6044290	48.04	protein_coding	synaptojanin 2	1703.73	0.465694	0.102046	4.56356	5.02932e-06	0.000602782	1.38098	103010
ENSMUSG00000052397	Ezr	6738041	6782784	49.01	protein_coding	ezrin	857.974	0.465382	0.118883	3.91461	9.05505e-05	0.00522375	1.38068	44743
ENSMUSG00000042978	Sbk1	126272619	126294999	53.68	protein_coding	SH3-binding kinase 1	631.023	0.464695	0.0968843	4.79639	1.6155e-06	0.000249558	1.38003	22380
ENSMUSG00000036887	C1qa	136895917	136898803	55.35	protein_coding	complement component 1, q subcomponent, alpha polypeptide	250.396	0.463251	0.0996984	4.64652	3.37581e-06	0.000451288	1.37864	2886
ENSMUSG00000067879	3110035E14Rik	9601199	9627143	45.04	protein_coding	RIKEN cDNA 3110035E14 gene	4775.23	0.462812	0.110164	4.20113	2.65588e-05	0.00210999	1.37823	25944
ENSMUSG00000021253	Tgfb3	86056744	86079041	48.98	protein_coding	transforming growth factor, beta 3	159.559	0.462734	0.126009	3.67223	0.000240442	0.0110691	1.37815	22297
ENSMUSG00000029189	Sel1l3	53107084	53213452	45.74	protein_coding	sel-1 suppressor of lin-12-like 3 (C. elegans)	808.934	0.462634	0.159426	2.90187	0.00370946	0.0658654	1.37806	106368
ENSMUSG00000075327	Zbtb2	4367074	4388108	48.59	protein_coding	zinc finger and BTB domain containing 2	182.306	0.462548	0.123991	3.73049	0.000191104	0.00932254	1.37797	21034
ENSMUSG00000102600	RP24-490B17.4	51850239	51852525	42.02	TEC		25.0801	0.462126	0.165608	2.79049	0.00526284	0.0818862	1.37757	2286
ENSMUSG00000038007	Acer2	86874396	86934822	45.39	protein_coding	alkaline ceramidase 2	105.254	0.461763	0.160264	2.88126	0.00396092	0.0679861	1.37722	60426
ENSMUSG00000024256	Adcyap1	93199422	93205485	48.71	protein_coding	adenylate cyclase activating polypeptide 1	191.641	0.461075	0.162512	2.83717	0.00455148	0.0737519	1.37657	6063
ENSMUSG00000033998	Kcnk1	125995102	126030683	47.46	protein_coding	potassium channel, subfamily K, member 1	532.771	0.460913	0.113612	4.05692	4.97234e-05	0.00332358	1.37641	35581
ENSMUSG00000042599	Kdm7a	39136623	39206789	39.33	protein_coding	lysine (K)-specific demethylase 7A	1802.72	0.459855	0.104747	4.39014	1.13279e-05	0.00117443	1.3754	70166
ENSMUSG00000040565	Btaf1	36926079	37012752	38.89	protein_coding	BTAF1 RNA polymerase II, B-TFIID transcription factor-associated, (Mot1 homolog, S. cerevisiae)	1363.03	0.459273	0.091631	5.0122	5.38105e-07	0.000106875	1.37485	86673
ENSMUSG00000037465	Klf10	38294413	38300707	51.25	protein_coding	Kruppel-like factor 10	434.685	0.457526	0.115958	3.94563	7.95919e-05	0.00479033	1.37319	6294
ENSMUSG00000054855	Rnd1	98663421	98677461	48.41	protein_coding	Rho family GTPase 1	205.596	0.457295	0.150771	3.03304	0.00242101	0.0502377	1.37297	14040
ENSMUSG00000024691	Fam111a	12545740	12589768	41.19	protein_coding	family with sequence similarity 111, member A	53.8701	0.45628	0.145448	3.13706	0.0017065	0.0416136	1.372	44028
ENSMUSG00000078317	F8a	73228291	73230795	51.46	protein_coding	factor 8-associated gene A	104.455	0.454968	0.131375	3.46314	0.000533916	0.0197633	1.37075	2504
ENSMUSG00000070493	Chchd2	129881156	129887470	46.52	protein_coding	coiled-coil-helix-coiled-coil-helix domain containing 2	1381.73	0.454322	0.140632	3.23058	0.00123539	0.0346983	1.37014	6314
ENSMUSG00000030357	Fkbp4	128429735	128438677	52.96	protein_coding	FK506 binding protein 4	1183.04	0.452121	0.0642756	7.03411	2.00537e-12	1.99148e-09	1.36805	8942
ENSMUSG00000030849	Fgfr2	130162451	133123350	45.77	protein_coding	fibroblast growth factor receptor 2	658.346	0.451409	0.123671	3.65006	0.000262174	0.0116454	1.36737	2960899
ENSMUSG00000100801	Gm15459	5781615	5783555	48.79	processed_pseudogene	predicted gene 15459	8183.17	0.447549	0.0878418	5.09495	3.48833e-07	7.34823e-05	1.36372	1940
ENSMUSG00000046417	Lrrc75a	62604884	62648523	49.34	protein_coding	leucine rich repeat containing 75A	126.876	0.44737	0.157265	2.84469	0.00444546	0.0722024	1.36355	43639
ENSMUSG00000064065	Ipcef1	6885796	7052478	40.93	protein_coding	interaction protein for cytohesin exchange factors 1	2015.95	0.444785	0.152631	2.91412	0.00356689	0.0644564	1.36111	166682
ENSMUSG00000025417	Pip4k2c	127197067	127211622	49.67	protein_coding	phosphatidylinositol-5-phosphate 4-kinase, type II, gamma	1045.73	0.444648	0.109278	4.06898	4.72188e-05	0.00324992	1.36098	14555
ENSMUSG00000036078	Sigmar1	41738493	41756157	47.61	protein_coding	sigma non-opioid intracellular receptor 1	303.026	0.444512	0.151678	2.93063	0.00338271	0.0623738	1.36085	17664
ENSMUSG00000021895	Arhgef3	27238039	27403904	44.56	protein_coding	Rho guanine nucleotide exchange factor (GEF) 3	1090.3	0.444183	0.109704	4.04893	5.14527e-05	0.00342271	1.36054	165865
ENSMUSG00000022895	Ets2	95702075	95721051	48.3	protein_coding	E26 avian leukemia oncogene 2, 3' domain	950.878	0.444044	0.0932378	4.76249	1.91216e-06	0.000285858	1.36041	18976
ENSMUSG00000026473	Glul	153899944	153909723	49.21	protein_coding	glutamate-ammonia ligase (glutamine synthetase)	14299.9	0.44403	0.0956767	4.64094	3.46823e-06	0.000459227	1.3604	9779
ENSMUSG00000041552	Ptchd1	155573455	155623814	37.79	protein_coding	patched domain containing 1	196.718	0.442234	0.150207	2.94417	0.00323818	0.0605114	1.35871	50359
ENSMUSG00000018736	Ndel1	68821434	68871858	43.7	protein_coding	nuclear distribution gene E-like homolog 1 (A. nidulans)	1463.72	0.441206	0.0968298	4.55651	5.20098e-06	0.00061279	1.35774	50424
ENSMUSG00000001053	N4bp3	51643063	51650842	56.75	protein_coding	NEDD4 binding protein 3	120.578	0.441199	0.127432	3.46223	0.000535719	0.0197633	1.35773	7779
ENSMUSG00000022765	Snap29	17406003	17430826	43.56	protein_coding	synaptosomal-associated protein 29	450.407	0.440199	0.101168	4.35116	1.35417e-05	0.00128952	1.35679	24823
ENSMUSG00000024245	Tmem178	80944632	81001816	44.19	protein_coding	transmembrane protein 178	991.877	0.439742	0.111435	3.94618	7.94065e-05	0.00479033	1.35636	57184
ENSMUSG00000052135	Foxo6	120267079	120287349	56.01	protein_coding	forkhead box O6	66.9362	0.438924	0.151506	2.89707	0.00376663	0.0663719	1.35559	20270
ENSMUSG00000042532	Golga7b	42247574	42270348	48.92	protein_coding	golgi autoantigen, golgin subfamily a, 7B	1185.12	0.438008	0.103366	4.23747	2.26055e-05	0.00189328	1.35473	22774
ENSMUSG00000030888	Rrp8	105732207	105737376	52.11	protein_coding	ribosomal RNA processing 8, methyltransferase, homolog (yeast)	133.892	0.437959	0.149604	2.92746	0.00341739	0.0625981	1.35469	5169
ENSMUSG00000007656	Arpp19	75037614	75060313	39.37	protein_coding	cAMP-regulated phosphoprotein 19	4825.01	0.437943	0.141308	3.09922	0.00194034	0.0447796	1.35467	22699
ENSMUSG00000026796	Fam129b	32876114	32925254	53.18	protein_coding	family with sequence similarity 129, member B	297.442	0.43755	0.13818	3.16653	0.00154272	0.0393548	1.3543	49140
ENSMUSG00000016239	Lonrf3	36328353	36362341	43.18	protein_coding	LON peptidase N-terminal domain and ring finger 3	88.9778	0.437533	0.131008	3.33975	0.000838531	0.0271118	1.35429	33988
ENSMUSG00000035342	Lzts2	45015176	45027104	55.26	protein_coding	leucine zipper, putative tumor suppressor 2	282.725	0.437453	0.10194	4.29129	1.77641e-05	0.00160373	1.35421	11928
ENSMUSG00000021224	Numb	83794034	83921934	40.91	protein_coding	numb gene homolog (Drosophila)	581.762	0.437143	0.136443	3.20384	0.00135607	0.0361177	1.35392	127900
ENSMUSG00000051495	Irf2bp2	126588296	126593986	54.72	protein_coding	interferon regulatory factor 2 binding protein 2	994.347	0.436795	0.0875493	4.98913	6.06519e-07	0.000117117	1.35359	5690
ENSMUSG00000048578	Mlec	115142981	115158179	49.97	protein_coding	malectin	1815.86	0.436576	0.0824117	5.2975	1.174e-07	2.59081e-05	1.35339	15198
ENSMUSG00000028063	Lmna	88481148	88509956	51.63	protein_coding	lamin A	436.737	0.435854	0.120856	3.60638	0.000310499	0.0133237	1.35271	28808
ENSMUSG00000027560	Dok5	170731807	170879769	45.59	protein_coding	docking protein 5	395.09	0.435193	0.0921133	4.72455	2.30629e-06	0.00033752	1.35209	147962
ENSMUSG00000028795	Ccdc28b	129619274	129623947	51.48	protein_coding	coiled coil domain containing 28B	194.372	0.435088	0.144226	3.01671	0.00255536	0.0519795	1.35199	4673
ENSMUSG00000021062	Rab15	76797960	76822908	50.3	protein_coding	RAB15, member RAS oncogene family	3120.07	0.434883	0.0878233	4.95179	7.35327e-07	0.0001337	1.3518	24948
ENSMUSG00000021203	Otub2	103388682	103406350	51.08	protein_coding	OTU domain, ubiquitin aldehyde binding 2	290.908	0.434856	0.0998731	4.35408	1.33624e-05	0.00128123	1.35178	17668
ENSMUSG00000025425	St8sia5	77185853	77255450	48.41	protein_coding	ST8 alpha-N-acetyl-neuraminide alpha-2,8-sialyltransferase 5	514.167	0.434824	0.134216	3.23972	0.00119647	0.0340174	1.35175	69597
ENSMUSG00000036578	Fxyd7	31042517	31051462	51.32	protein_coding	FXYD domain-containing ion transport regulator 7	600.162	0.434049	0.139334	3.11518	0.00183833	0.0436149	1.35102	8945
ENSMUSG00000037703	Lzts3	130632839	130642803	55.1	protein_coding	leucine zipper, putative tumor suppressor family member 3	2332.4	0.432336	0.140205	3.08359	0.00204521	0.0457883	1.34942	9964
ENSMUSG00000054934	Kcnmb4	116417861	116473878	45.65	protein_coding	potassium large conductance calcium-activated channel, subfamily M, beta member 4	505.885	0.431444	0.106821	4.03894	5.36925e-05	0.00352116	1.34858	56017
ENSMUSG00000047415	Gpr68	100876682	100908198	48.97	protein_coding	G protein-coupled receptor 68	156.073	0.427204	0.147082	2.90453	0.00367811	0.0654759	1.34463	31516
ENSMUSG00000049327	Setd8	124439930	124462308	50.11	protein_coding	SET domain containing (lysine methyltransferase) 8	595.972	0.426908	0.102652	4.1588	3.19924e-05	0.00241734	1.34435	22378
ENSMUSG00000051316	Taf7	37640491	37644204	39.55	protein_coding	TAF7 RNA polymerase II, TATA box binding protein (TBP)-associated factor	276.692	0.426299	0.0883096	4.82733	1.38377e-06	0.000223704	1.34378	3713
ENSMUSG00000051067	Lingo3	80832807	80844039	56.89	protein_coding	leucine rich repeat and Ig domain containing 3	198.99	0.423208	0.152583	2.77363	0.00554354	0.0840477	1.34091	11232
ENSMUSG00000050896	Rtn4rl2	84871924	84886710	53.5	protein_coding	reticulon 4 receptor-like 2	162.836	0.423148	0.15407	2.74647	0.00602397	0.0894163	1.34085	14786
ENSMUSG00000021025	Nfkbia	55489411	55492647	54.37	protein_coding	nuclear factor of kappa light polypeptide gene enhancer in B cells inhibitor, alpha	198.129	0.421924	0.143851	2.93306	0.00335642	0.0619711	1.33971	3236
ENSMUSG00000025408	Ddit3	127290774	127296288	48.81	protein_coding	DNA-damage inducible transcript 3	188.529	0.421053	0.101372	4.15356	3.27344e-05	0.00246003	1.3389	5514
ENSMUSG00000027397	Slc20a1	129198764	129211616	45.49	protein_coding	solute carrier family 20, member 1	1364.27	0.419936	0.0913882	4.59507	4.32597e-06	0.000536999	1.33787	12852
ENSMUSG00000004931	Apba3	81268172	81273246	57.2	protein_coding	amyloid beta (A4) precursor protein-binding, family A, member 3	120.851	0.418387	0.135356	3.09101	0.00199474	0.0451999	1.33643	5074
ENSMUSG00000033316	Galnt9	110544345	110621382	49.06	protein_coding	UDP-N-acetyl-alpha-D-galactosamine:polypeptide N-acetylgalactosaminyltransferase 9	774.65	0.416754	0.0961823	4.33296	1.47117e-05	0.00137273	1.33492	77037
ENSMUSG00000026558	Uck2	167222883	167285320	49.63	protein_coding	uridine-cytidine kinase 2	433.3	0.416625	0.0758903	5.48983	4.02325e-08	1.1187e-05	1.3348	62437
ENSMUSG00000048332	Lhfp	53041528	53261679	42.92	protein_coding	lipoma HMGIC fusion partner	242.282	0.41642	0.124744	3.33819	0.000843261	0.0272015	1.33461	220151
ENSMUSG00000014470	Rnf166	122466147	122476064	53.63	protein_coding	ring finger protein 166	240.321	0.415924	0.128745	3.2306	0.00123531	0.0346983	1.33415	9917
ENSMUSG00000024889	Rce1	4622551	4625617	55.85	protein_coding	RCE1 homolog, prenyl protein peptidase (S. cerevisiae)	100.754	0.415862	0.128141	3.24535	0.00117306	0.0338441	1.3341	3066
ENSMUSG00000027540	Ptpn1	167932057	167979385	50.35	protein_coding	protein tyrosine phosphatase, non-receptor type 1	447.893	0.413963	0.110052	3.76151	0.000168892	0.00844644	1.33234	47328
ENSMUSG00000001768	Rin2	145784734	145887616	45.27	protein_coding	Ras and Rab interactor 2	557.7	0.413661	0.105045	3.93795	8.21809e-05	0.00486196	1.33206	102882
ENSMUSG00000038132	Rbm24	46418300	46431090	44.73	protein_coding	RNA binding motif protein 24	301.588	0.41341	0.128801	3.20968	0.00132884	0.0356657	1.33183	12790
ENSMUSG00000015605	Srf	46546839	46556162	55.36	protein_coding	serum response factor	625.389	0.4128	0.10363	3.98342	6.79319e-05	0.00427356	1.33127	9323
ENSMUSG00000036905	C1qb	136880129	136886187	49.25	protein_coding	complement component 1, q subcomponent, beta polypeptide	129.46	0.412511	0.130106	3.17058	0.00152134	0.0390244	1.331	6058
ENSMUSG00000050164	Mchr1	81235499	81238963	54.2	protein_coding	melanin-concentrating hormone receptor 1	170.937	0.411509	0.132502	3.10568	0.00189842	0.0442132	1.33008	3464
ENSMUSG00000021457	Syk	52583173	52648792	47	protein_coding	spleen tyrosine kinase	51.5106	0.411027	0.149418	2.75086	0.00594395	0.0885939	1.32963	65619
ENSMUSG00000044496	2510039O18Rik	147940895	147947314	54.08	protein_coding	RIKEN cDNA 2510039O18 gene	230.814	0.410305	0.132722	3.09146	0.00199172	0.0451999	1.32897	6419
ENSMUSG00000031822	Gse1	120230536	120581390	54.41	protein_coding	genetic suppressor element 1	594.119	0.409708	0.103867	3.94453	7.99557e-05	0.00479148	1.32842	350854
ENSMUSG00000032265	Fam46a	85320439	85327348	44.36	protein_coding	family with sequence similarity 46, member A	92.4457	0.408342	0.1397	2.92299	0.00346684	0.0632716	1.32716	6909
ENSMUSG00000042116	Vwa1	155768149	155774698	55.57	protein_coding	von Willebrand factor A domain containing 1	263.62	0.407786	0.135452	3.01055	0.00260774	0.0524681	1.32665	6549
ENSMUSG00000031485	Prosc	27042555	27056131	46.92	protein_coding	proline synthetase co-transcribed	558.441	0.407669	0.119293	3.41737	0.000632299	0.0222553	1.32654	13576
ENSMUSG00000047428	Dlk2	46297421	46303271	56.18	protein_coding	delta-like 2 homolog (Drosophila)	181.992	0.406235	0.119363	3.40334	0.000665663	0.0230217	1.32522	5850
ENSMUSG00000028527	Ak4	101419277	101466995	46.46	protein_coding	adenylate kinase 4	537.655	0.405295	0.111406	3.63801	0.000274756	0.0120884	1.32436	47718
ENSMUSG00000032532	Cck	121489825	121495689	49.21	protein_coding	cholecystokinin	1380.25	0.403787	0.143593	2.81202	0.00492307	0.077744	1.32298	5864
ENSMUSG00000037253	Mex3c	73573044	73592575	40.69	protein_coding	mex3 homolog C (C. elegans)	729.576	0.403266	0.0965317	4.17754	2.94673e-05	0.00227602	1.3225	19531
ENSMUSG00000031791	Tmem38a	72572103	72587282	49.37	protein_coding	transmembrane protein 38A	703.76	0.403199	0.0958674	4.20579	2.60169e-05	0.00209714	1.32244	15179
ENSMUSG00000039167	Eltd1	151437887	151545086	38.34	protein_coding	EGF, latrophilin seven transmembrane domain containing 1	225.133	0.402554	0.124114	3.24343	0.00118098	0.0338441	1.32185	107199
ENSMUSG00000027660	Skil	31095058	31122577	41.33	protein_coding	SKI-like	1988.63	0.402413	0.0746979	5.3872	7.15631e-08	1.74551e-05	1.32172	27519
ENSMUSG00000087141	Plcxd2	45959263	46010218	42.84	protein_coding	phosphatidylinositol-specific phospholipase C, X domain containing 2	3306.27	0.402283	0.124049	3.24293	0.00118307	0.0338441	1.3216	50955
ENSMUSG00000031700	Gpt2	85492576	85527560	48.52	protein_coding	glutamic pyruvate transaminase (alanine aminotransferase) 2	602.128	0.401888	0.0921536	4.36106	1.29432e-05	0.00125657	1.32124	34984
ENSMUSG00000025049	Taf5	47067748	47083479	42.72	protein_coding	TAF5 RNA polymerase II, TATA box binding protein (TBP)-associated factor	118.582	0.401688	0.13394	2.99902	0.00270852	0.0536419	1.32105	15731
ENSMUSG00000015656	Hspa8	40800984	40805200	49.51	protein_coding	heat shock protein 8	19241.3	0.401648	0.0696881	5.76351	8.23833e-09	3.2725e-06	1.32102	4216
ENSMUSG00000089706	B230216N24Rik	98031116	98057680	40.25	processed_transcript	RIKEN cDNA B230216N24 gene	193.456	0.400727	0.114269	3.50688	0.000453395	0.0177066	1.32017	26564
ENSMUSG00000028634	Hivep3	119733784	120138045	47.59	protein_coding	human immunodeficiency virus type I enhancer binding protein 3	1113.35	0.399871	0.112947	3.54034	0.000399619	0.0160113	1.31939	404261
ENSMUSG00000007944	Ttc9b	27653915	27656208	59.42	protein_coding	tetratricopeptide repeat domain 9B	349.815	0.399607	0.123262	3.24194	0.0011872	0.0338926	1.31915	2293
ENSMUSG00000004451	Ralb	119470305	119504794	48.16	protein_coding	v-ral simian leukemia viral oncogene homolog B (ras related)	201.586	0.399566	0.103968	3.84315	0.000121464	0.00649508	1.31911	34489
ENSMUSG00000033933	Vhl	113623959	113631633	47.32	protein_coding	von Hippel-Lindau tumor suppressor	422.308	0.399207	0.0925742	4.31229	1.61572e-05	0.00147786	1.31878	7674
ENSMUSG00000025981	Coq10b	55052770	55072702	43.11	protein_coding	coenzyme Q10 homolog B (S. cerevisiae)	272.307	0.39886	0.147373	2.70646	0.00680046	0.0964763	1.31847	19932
ENSMUSG00000043079	Synpo	60593973	60660142	51.16	protein_coding	synaptopodin	1414.21	0.398308	0.115679	3.44323	0.000574816	0.020866	1.31796	66169
ENSMUSG00000048163	Selplg	113817798	113830501	50.22	protein_coding	selectin, platelet (p-selectin) ligand	263.074	0.396463	0.133815	2.96277	0.0030488	0.0583046	1.31628	12703
ENSMUSG00000063802	Hspbp1	4660521	4684963	46.85	protein_coding	HSPA (heat shock 70kDa) binding protein, cytoplasmic cochaperone 1	584.544	0.396207	0.13692	2.8937	0.00380726	0.0665815	1.31604	24442
ENSMUSG00000033055	Ankrd54	79053094	79062893	52.04	protein_coding	ankyrin repeat domain 54	65.2071	0.395851	0.144715	2.73539	0.00623065	0.0916664	1.31572	9799
ENSMUSG00000028967	Errfi1	150853919	150868892	43.8	protein_coding	ERBB receptor feedback inhibitor 1	465.888	0.393212	0.111004	3.54232	0.000396631	0.0159375	1.31331	14973
ENSMUSG00000018634	Crhr1	104132855	104175523	51.55	protein_coding	corticotropin releasing hormone receptor 1	153.097	0.392914	0.142966	2.7483	0.00599048	0.089171	1.31304	42668
ENSMUSG00000042500	Ago4	126489541	126533472	42.68	protein_coding	argonaute RISC catalytic subunit 4	205.573	0.392843	0.127102	3.09077	0.00199639	0.0451999	1.31298	43931
ENSMUSG00000019772	Vip	5639218	5647614	37.63	protein_coding	vasoactive intestinal polypeptide	626.204	0.392409	0.135816	2.88928	0.00386127	0.0668534	1.31258	8396
ENSMUSG00000068744	Psrc1	108383839	108388231	50.63	protein_coding	proline/serine-rich coiled-coil 1	112.052	0.392217	0.14356	2.73209	0.00629344	0.0923945	1.31241	4392
ENSMUSG00000066877	Nck2	43444579	43570515	44.34	protein_coding	non-catalytic region of tyrosine kinase adaptor protein 2	522.216	0.390469	0.0960295	4.06613	4.77998e-05	0.0032737	1.31082	125936
ENSMUSG00000027864	Ptgfrn	101040232	101110278	47.61	protein_coding	prostaglandin F2 receptor negative regulator	524.406	0.388417	0.115207	3.37149	0.000747639	0.0251073	1.30896	70046
ENSMUSG00000017376	Nlk	78567168	78697373	40.51	protein_coding	nemo like kinase	2145.74	0.386824	0.109404	3.53574	0.000406629	0.0161987	1.30751	130205
ENSMUSG00000006215	Zbtb17	141444654	141467930	53.48	protein_coding	zinc finger and BTB domain containing 17	464.635	0.386339	0.106804	3.61727	0.000297722	0.0129029	1.30707	23276
ENSMUSG00000030082	Sec61a1	88503601	88518905	48.54	protein_coding	Sec61 alpha 1 subunit (S. cerevisiae)	719.452	0.385949	0.0844422	4.57058	4.86387e-06	0.000593179	1.30672	15304
ENSMUSG00000026740	Dnajc1	18195654	18392830	38.7	protein_coding	DnaJ (Hsp40) homolog, subfamily C, member 1	631.331	0.385915	0.112129	3.44171	0.000578056	0.020929	1.30669	197176
ENSMUSG00000034997	Htr2a	74640840	74706859	42.66	protein_coding	5-hydroxytryptamine (serotonin) receptor 2A	225.684	0.385744	0.121606	3.17209	0.00151348	0.0388946	1.30653	66019
ENSMUSG00000014361	Mertk	128698956	128802894	44.58	protein_coding	c-mer proto-oncogene tyrosine kinase	538.572	0.385279	0.113119	3.40597	0.000659306	0.0228658	1.30611	103938
ENSMUSG00000002028	Kmt2a	44803355	44881296	45.68	protein_coding	lysine (K)-specific methyltransferase 2A	3423.67	0.383878	0.120065	3.19724	0.00138748	0.0366733	1.30484	77941
ENSMUSG00000070284	Gmppb	108049242	108052801	54.8	protein_coding	GDP-mannose pyrophosphorylase B	94.3135	0.381964	0.127091	3.00544	0.00265196	0.053019	1.30311	3559
ENSMUSG00000028896	Rcc1	132331919	132353605	49.42	protein_coding	regulator of chromosome condensation 1	102.92	0.381596	0.118637	3.21651	0.00129759	0.0350981	1.30278	21686
ENSMUSG00000025192	Entpd7	43689672	43733697	45.96	protein_coding	ectonucleoside triphosphate diphosphohydrolase 7	204.872	0.381102	0.136302	2.796	0.00517389	0.0808232	1.30234	44025
ENSMUSG00000048039	Isg20l2	87930314	87940686	46.66	protein_coding	interferon stimulated exonuclease gene 20-like 2	164.842	0.37941	0.128656	2.94903	0.00318778	0.0598914	1.30081	10372
ENSMUSG00000037172	E330009J07Rik	40401375	40436135	45.71	protein_coding	RIKEN cDNA E330009J07 gene	1506.06	0.379122	0.0898658	4.21876	2.45645e-05	0.00202601	1.30055	34760
ENSMUSG00000063239	Grm4	27422387	27513341	54.52	protein_coding	glutamate receptor, metabotropic 4	251.942	0.378963	0.133052	2.84822	0.00439639	0.071825	1.30041	90954
ENSMUSG00000053716	Dusp7	106368632	106375724	56.66	protein_coding	dual specificity phosphatase 7	697.198	0.378926	0.136584	2.77431	0.00553191	0.0840477	1.30037	7092
ENSMUSG00000092558	Med20	47611582	47624418	47.4	protein_coding	mediator complex subunit 20	216.459	0.377542	0.116031	3.25382	0.00113865	0.0332578	1.29913	12836
ENSMUSG00000020053	Igf1	87858265	87937042	41.03	protein_coding	insulin-like growth factor 1	182.171	0.37719	0.103327	3.65046	0.000261771	0.0116454	1.29881	78777
ENSMUSG00000039501	Znfx1	167035793	167063015	48.97	protein_coding	zinc finger, NFX1-type containing 1	820.93	0.376994	0.137471	2.74235	0.00610012	0.0902233	1.29863	27222
ENSMUSG00000042202	Slc35e2	155601416	155623340	45.52	protein_coding	solute carrier family 35, member E2	1206.36	0.376498	0.0694492	5.4212	5.91987e-08	1.52415e-05	1.29819	21924
ENSMUSG00000045349	Sh2d5	138250403	138261332	55.83	protein_coding	SH2 domain containing 5	400.05	0.376362	0.116817	3.22181	0.00127381	0.0350112	1.29806	10929
ENSMUSG00000046062	Ppp1r15b	133131143	133139783	47.19	protein_coding	protein phosphatase 1, regulatory (inhibitor) subunit 15b	1001.13	0.374653	0.0588791	6.36309	1.97732e-10	1.37453e-07	1.29653	8640
ENSMUSG00000053004	Hrh1	114397936	114483296	49.09	protein_coding	histamine receptor H1	205.792	0.374076	0.127709	2.92911	0.00339929	0.0623844	1.29601	85360
ENSMUSG00000006705	Pknox1	31564749	31607684	48.06	protein_coding	Pbx/knotted 1 homeobox	233.381	0.37352	0.130992	2.85148	0.0043516	0.0716127	1.29551	42935
ENSMUSG00000053907	Mat2a	72432799	72439558	43.02	protein_coding	methionine adenosyltransferase II, alpha	401.771	0.372429	0.09661	3.85497	0.000115744	0.00628592	1.29453	6759
ENSMUSG00000049556	Lingo1	56618475	56685253	52.73	protein_coding	leucine rich repeat and Ig domain containing 1	3837.37	0.372165	0.115297	3.22788	0.00124713	0.0348169	1.29429	66778
ENSMUSG00000073468	Sft2d1	8311102	8396852	47.77	protein_coding	SFT2 domain containing 1	164.081	0.372034	0.122498	3.03706	0.00238901	0.0498715	1.29418	85750
ENSMUSG00000016528	Mapkapk2	131053700	131097826	48.69	protein_coding	MAP kinase-activated protein kinase 2	273.286	0.369194	0.11782	3.13354	0.00172714	0.0419394	1.29163	44126
ENSMUSG00000024222	Fkbp5	28399095	28517524	45.28	protein_coding	FK506 binding protein 5	294.132	0.369123	0.115072	3.20776	0.00133772	0.0356973	1.29157	118429
ENSMUSG00000003814	Calr	84841850	84846934	48.79	protein_coding	calreticulin	5779.36	0.368443	0.078307	4.70511	2.53725e-06	0.000363664	1.29096	5084
ENSMUSG00000058709	Egln2	27158658	27166802	56.16	protein_coding	egl-9 family hypoxia-inducible factor 2	657.147	0.367731	0.0758104	4.85067	1.23046e-06	0.00020126	1.29032	8144
ENSMUSG00000043858	Nup62	44816088	44830809	50.09	protein_coding	nucleoporin 62	275.881	0.367569	0.12418	2.95997	0.00307669	0.0586038	1.29018	14721
ENSMUSG00000010154	Spire2	123332713	123369515	50	protein_coding	spire homolog 2 (Drosophila)	153.052	0.366988	0.112424	3.26433	0.00109722	0.0325258	1.28966	36802
ENSMUSG00000017009	Sdc4	164424247	164443887	51.13	protein_coding	syndecan 4	881.68	0.365388	0.107877	3.38708	0.000706408	0.0239643	1.28823	19640
ENSMUSG00000032503	Arpp21	112065091	112235938	42.65	protein_coding	cyclic AMP-regulated phosphoprotein, 21	8247.3	0.364534	0.101534	3.59025	0.000330363	0.0138763	1.28747	170847
ENSMUSG00000033594	Spata2l	123232255	123236209	57.37	protein_coding	spermatogenesis associated 2-like	386.715	0.363285	0.113866	3.19046	0.00142046	0.0371215	1.28635	3954
ENSMUSG00000021701	Plk2	110395044	110400844	46.13	protein_coding	polo-like kinase 2	3943.57	0.360659	0.0768766	4.6914	2.71337e-06	0.00038105	1.28401	5800
ENSMUSG00000031217	Efnb1	99136130	99148991	54.71	protein_coding	ephrin B1	169.428	0.360168	0.115909	3.10733	0.00188788	0.0442132	1.28358	12861
ENSMUSG00000014859	E2f4	105297663	105305369	50.16	protein_coding	E2F transcription factor 4	138.087	0.359786	0.117636	3.05847	0.0022247	0.0481777	1.28324	7706
ENSMUSG00000070867	Trabd2b	114406724	114615098	46.8	protein_coding	TraB domain containing 2B	110.179	0.35942	0.118404	3.03555	0.00240101	0.0500468	1.28291	208374
ENSMUSG00000024486	Hbegf	36504929	36515805	49.6	protein_coding	heparin-binding EGF-like growth factor	106.816	0.359049	0.118164	3.03857	0.00237704	0.0498715	1.28258	10876
ENSMUSG00000089774	Slc5a3	92058322	92087473	42.68	protein_coding	solute carrier family 5 (inositol transporters), member 3	1641.42	0.358502	0.106985	3.35095	0.000805344	0.0262833	1.28209	29151
ENSMUSG00000084845	Tmem240	155734800	155740564	56.58	protein_coding	transmembrane protein 240	230.081	0.358489	0.127847	2.80406	0.00504639	0.0791536	1.28208	5764
ENSMUSG00000023075	Akirin1	123734559	123750345	43.9	protein_coding	akirin 1	845.661	0.356963	0.0702105	5.08418	3.69221e-07	7.66162e-05	1.28073	15786
ENSMUSG00000020571	Pdia6	17266545	17284770	45.33	protein_coding	protein disulfide isomerase associated 6	1747.74	0.356325	0.103325	3.44858	0.00056354	0.020564	1.28016	18225
ENSMUSG00000067928	Zfp760	21707741	21725636	37.65	protein_coding	zinc finger protein 760	213.745	0.354114	0.0914573	3.8719	0.000107989	0.00600549	1.2782	17895
ENSMUSG00000024789	Jak2	29251828	29313080	39.41	protein_coding	Janus kinase 2	1264.92	0.353819	0.0633589	5.58436	2.34567e-08	7.41177e-06	1.27794	61252
ENSMUSG00000050271	D8Ertd82e	36094828	36147787	46.51	protein_coding	DNA segment, Chr 8, ERATO Doi 82, expressed	341.9	0.353495	0.108202	3.26698	0.00108703	0.0323618	1.27765	52959
ENSMUSG00000022200	Golph3	12321496	12351265	41.68	protein_coding	golgi phosphoprotein 3	1312.06	0.353397	0.0785426	4.49943	6.81353e-06	0.000770151	1.27757	29769
ENSMUSG00000038605	Samd10	181595218	181599212	52.97	protein_coding	sterile alpha motif domain containing 10	107.336	0.353237	0.122721	2.87839	0.00399716	0.068355	1.27742	3994
ENSMUSG00000032883	Acsl3	78657825	78707743	42.55	protein_coding	acyl-CoA synthetase long-chain family member 3	3175.79	0.352726	0.0838802	4.20511	2.60955e-05	0.00209714	1.27697	49918
ENSMUSG00000045176	2310047M10Rik	69059717	69061578	63.1	protein_coding	RIKEN cDNA 2310047M10 gene	90.1032	0.350971	0.128868	2.72349	0.00645966	0.0935507	1.27542	1861
ENSMUSG00000019558	Slc6a8	73673150	73682502	54.36	protein_coding	solute carrier family 6 (neurotransmitter transporter, creatine), member 8	701.107	0.350502	0.119453	2.93423	0.00334377	0.0618197	1.275	9352
ENSMUSG00000028907	Utp11l	124678160	124693600	44.25	protein_coding	UTP11-like, U3 small nucleolar ribonucleoprotein, (yeast)	186.242	0.350293	0.0950117	3.68685	0.000227051	0.0106027	1.27482	15440
ENSMUSG00000040010	Slc7a5	121881150	121907694	53.89	protein_coding	solute carrier family 7 (cationic amino acid transporter, y+ system), member 5	263.97	0.349775	0.0877596	3.98561	6.73075e-05	0.00426916	1.27436	26544
ENSMUSG00000038055	Dexi	10502531	10543054	50.61	protein_coding	dexamethasone-induced transcript	161.218	0.348742	0.123882	2.81511	0.0048761	0.0773004	1.27345	40523
ENSMUSG00000047824	Pygo2	89430214	89435128	54.55	protein_coding	pygopus 2	328.345	0.348401	0.108247	3.21856	0.00128836	0.0350112	1.27315	4914
ENSMUSG00000041264	Uspl1	149184350	149215434	43.68	protein_coding	ubiquitin specific peptidase like 1	511.532	0.347203	0.0964204	3.60093	0.000317081	0.0134813	1.27209	31084
ENSMUSG00000042406	Atf4	80255184	80257540	56.47	protein_coding	activating transcription factor 4	1390.36	0.346764	0.092594	3.745	0.000180396	0.0088938	1.27171	2356
ENSMUSG00000018401	Mtmr4	87592162	87616302	48.15	protein_coding	myotubularin related protein 4	1198.29	0.346698	0.0825825	4.1982	2.69044e-05	0.00211328	1.27165	24140
ENSMUSG00000065954	Tacc1	25154552	25201449	47.17	protein_coding	transforming, acidic coiled-coil containing protein 1	4550.19	0.346107	0.0849371	4.07486	4.60415e-05	0.00318465	1.27113	46897
ENSMUSG00000051451	Crebzf	90442729	90447717	44.64	protein_coding	CREB/ATF bZIP transcription factor	575.777	0.34559	0.120984	2.85648	0.00428365	0.0714747	1.27067	4988
ENSMUSG00000038866	Zcchc2	105990406	106034074	44.08	protein_coding	zinc finger, CCHC domain containing 2	546.651	0.344791	0.0960895	3.58823	0.000332931	0.0138836	1.26997	43668
ENSMUSG00000013419	Zfp651	121760033	121771742	58.06	protein_coding	zinc finger protein 651	826.016	0.344728	0.107312	3.21238	0.00131642	0.0354693	1.26991	11709
ENSMUSG00000035629	1700021K19Rik	32821703	32877766	46.03	protein_coding	RIKEN cDNA 1700021K19 gene	1349.6	0.343536	0.0871388	3.9424	8.06711e-05	0.00481361	1.26886	56063
ENSMUSG00000024145	Pigf	86997256	87025406	41.49	protein_coding	phosphatidylinositol glycan anchor biosynthesis, class F	122.284	0.34335	0.114524	2.99807	0.00271699	0.0536566	1.2687	28150
ENSMUSG00000020272	Stk10	32533305	32624587	50.4	protein_coding	serine/threonine kinase 10	169.681	0.343066	0.118042	2.9063	0.00365736	0.0653577	1.26845	91282
ENSMUSG00000026819	Slc25a25	32414487	32451445	47.21	protein_coding	solute carrier family 25 (mitochondrial carrier, phosphate carrier), member 25	656.506	0.342334	0.0853851	4.0093	6.08999e-05	0.00391987	1.26781	36958
ENSMUSG00000039701	Usp53	122933601	122984447	39.26	protein_coding	ubiquitin specific peptidase 53	713.035	0.342064	0.103289	3.3117	0.000927297	0.0291053	1.26757	50846
ENSMUSG00000026238	Ptma	86526726	86530712	57.14	protein_coding	prothymosin alpha	1476.28	0.341278	0.0997477	3.42141	0.000622981	0.0221414	1.26688	3986
ENSMUSG00000031608	Galnt7	57523828	57653032	43.56	protein_coding	UDP-N-acetyl-alpha-D-galactosamine: polypeptide N-acetylgalactosaminyltransferase 7	254.372	0.338654	0.108555	3.11964	0.00181072	0.0431807	1.26458	129204
ENSMUSG00000030718	Ppme1	100326737	100371896	40.74	protein_coding	protein phosphatase methylesterase 1	2080.19	0.337759	0.106231	3.17946	0.00147547	0.0382002	1.26379	45159
ENSMUSG00000038485	Socs7	97362551	97398542	46.74	protein_coding	suppressor of cytokine signaling 7	1711.28	0.336667	0.0789897	4.26216	2.02456e-05	0.00174829	1.26284	35991
ENSMUSG00000045045	Lrfn4	4611785	4615667	64.67	protein_coding	leucine rich repeat and fibronectin type III domain containing 4	349.515	0.336585	0.120223	2.79967	0.00511545	0.08	1.26276	3882
ENSMUSG00000001089	Luzp1	136469761	136554780	40.42	protein_coding	leucine zipper protein 1	2185.67	0.33572	0.116833	2.87352	0.00405931	0.069204	1.26201	85019
ENSMUSG00000024955	Esrra	6910977	6921813	53.15	protein_coding	estrogen related receptor, alpha	246.563	0.335677	0.121668	2.75895	0.00579876	0.0869688	1.26197	10836
ENSMUSG00000031976	Urb2	124021508	124048505	44.44	protein_coding	URB2 ribosome biogenesis 2 homolog (S. cerevisiae)	237.397	0.335177	0.0989518	3.38728	0.00070589	0.0239643	1.26153	26997
ENSMUSG00000025147	Mob2	142008553	142061034	46.52	protein_coding	MOB kinase activator 2	197.398	0.333589	0.114845	2.9047	0.0036761	0.0654759	1.26014	52481
ENSMUSG00000018476	Kdm6b	69398508	69413675	56.8	protein_coding	KDM1 lysine (K)-specific demethylase 6B	223.55	0.333341	0.109407	3.04679	0.00231296	0.0493963	1.25993	15167
ENSMUSG00000034659	Tmem109	10870660	10882001	48.94	protein_coding	transmembrane protein 109	140.202	0.332846	0.120844	2.75435	0.0058808	0.0880094	1.2595	11341
ENSMUSG00000014177	Tvp23b	62879455	62916780	45.05	protein_coding	trans-golgi network vesicle protein 23B	386.602	0.331617	0.0879965	3.76852	0.000164218	0.00830227	1.25842	37325
ENSMUSG00000041609	Ccdc64	115648175	115731621	45.76	protein_coding	coiled-coil domain containing 64	518.864	0.330821	0.0939715	3.52044	0.000430824	0.0169681	1.25773	83446
ENSMUSG00000000740	Rpl13	123102350	123105244	54.34	protein_coding	ribosomal protein L13	889.266	0.330279	0.0970755	3.40229	0.000668246	0.0230536	1.25726	2894
ENSMUSG00000033805	Ephx4	107402736	107430035	42.58	protein_coding	epoxide hydrolase 4	564.649	0.330193	0.121226	2.72377	0.00645409	0.0935507	1.25718	27299
ENSMUSG00000004460	Dnajb11	22857845	22879634	44.76	protein_coding	DnaJ (Hsp40) homolog, subfamily B, member 11	825.75	0.330131	0.0906923	3.64012	0.000272513	0.0120278	1.25713	21789
ENSMUSG00000021431	Snrnp48	38204939	38227663	41.95	protein_coding	small nuclear ribonucleoprotein 48 (U11/U12)	177.817	0.32896	0.108296	3.03761	0.00238463	0.0498715	1.25611	22724
ENSMUSG00000001054	Rmnd5b	51623671	51635896	50.38	protein_coding	required for meiotic nuclear division 5 homolog B (S. cerevisiae)	256.143	0.328564	0.114852	2.86075	0.0042264	0.0708349	1.25576	12225
ENSMUSG00000001525	Tubb5	35833921	35838306	51.62	protein_coding	tubulin, beta 5 class I	6017.94	0.327518	0.0935628	3.50052	0.00046435	0.0180331	1.25485	4385
ENSMUSG00000070576	Mn1	111417362	111457033	53.36	protein_coding	meningioma 1	618.754	0.32704	0.100543	3.25275	0.00114293	0.0332583	1.25444	39671
ENSMUSG00000039789	Zfp597	3858321	3884561	42.04	protein_coding	zinc finger protein 597	445.699	0.326794	0.0928163	3.52087	0.000430132	0.0169681	1.25422	26240
ENSMUSG00000026617	Bpnt1	185332149	185357777	45.24	protein_coding	bisphosphate 3'-nucleotidase 1	638.843	0.325956	0.0823484	3.95826	7.54977e-05	0.0046037	1.2535	25628
ENSMUSG00000025931	Paqr8	20890606	20939650	44.42	protein_coding	progestin and adipoQ receptor family member VIII	1572.21	0.325298	0.10106	3.21886	0.00128702	0.0350112	1.25292	49044
ENSMUSG00000047547	Cltb	54592401	54611344	50.42	protein_coding	clathrin, light polypeptide (Lcb)	1213.88	0.32428	0.106549	3.04347	0.00233864	0.0495641	1.25204	18943
ENSMUSG00000035242	Oaz1	80826656	80829290	55.94	protein_coding	ornithine decarboxylase antizyme 1	1630.13	0.324081	0.0800974	4.04609	5.20804e-05	0.00343163	1.25187	2634
ENSMUSG00000027520	Zdbf2	63273265	63314576	38.27	protein_coding	zinc finger, DBF-type containing 2	1144.88	0.323257	0.0980229	3.29777	0.000974572	0.030177	1.25115	41311
ENSMUSG00000040250	Asun	146549632	146577835	38.35	protein_coding	asunder, spermatogenesis regulator	320.388	0.322268	0.107624	2.99439	0.0027499	0.0540779	1.25029	28203
ENSMUSG00000034006	Pqlc1	80253292	80292725	49.74	protein_coding	PQ loop repeat containing 1	160.77	0.322108	0.105956	3.04001	0.00236567	0.0498332	1.25016	39433
ENSMUSG00000041328	Pcf11	92643712	92669933	37.17	protein_coding	cleavage and polyadenylation factor subunit homolog (S. cerevisiae)	1309.08	0.322028	0.089342	3.60444	0.000312828	0.0133559	1.25009	26221
ENSMUSG00000033257	Ttll4	74661745	74703730	43.92	protein_coding	tubulin tyrosine ligase-like family, member 4	260.687	0.320474	0.10069	3.18278	0.00145867	0.0378355	1.24874	41985
ENSMUSG00000056962	Jmjd6	116837432	116843449	52.06	protein_coding	jumonji domain containing 6	293.319	0.319457	0.104623	3.0534	0.00226262	0.0488465	1.24786	6017
ENSMUSG00000057069	Ero1lb	12565883	12609526	41.33	protein_coding	ERO1-like beta (S. cerevisiae)	345.297	0.319347	0.0780575	4.09118	4.29184e-05	0.00299846	1.24777	43643
ENSMUSG00000043866	Taf10	105739393	105744361	50.92	protein_coding	TAF10 RNA polymerase II, TATA box binding protein (TBP)-associated factor	536.512	0.319209	0.103887	3.07266	0.00212161	0.0466721	1.24765	4968
ENSMUSG00000039879	Heca	17900466	17948067	40.54	protein_coding	headcase homolog (Drosophila)	534.235	0.318887	0.104005	3.06607	0.00216889	0.0474121	1.24737	47601
ENSMUSG00000037788	Vopp1	57727807	57825154	41.32	protein_coding	vesicular, overexpressed in cancer, prosurvival protein 1	1967.17	0.317409	0.0888963	3.57056	0.000356223	0.0145236	1.24609	97347
ENSMUSG00000052748	Swt1	151367699	151428455	38.49	protein_coding	SWT1 RNA endoribonuclease homolog (S. cerevisiae)	239.114	0.316957	0.0995531	3.1838	0.00145357	0.0378188	1.2457	60756
ENSMUSG00000002504	Slc9a3r2	24639282	24650305	56.16	protein_coding	solute carrier family 9 (sodium/hydrogen exchanger), member 3 regulator 2	313.077	0.316456	0.108774	2.90931	0.00362227	0.0650652	1.24527	11023
ENSMUSG00000041220	Elovl6	129532386	129638495	44.39	protein_coding	ELOVL family member 6, elongation of long chain fatty acids (yeast)	989.048	0.316407	0.0721226	4.38708	1.14883e-05	0.00117443	1.24523	106109
ENSMUSG00000032402	Smad3	63646767	63757994	50.14	protein_coding	SMAD family member 3	1011.55	0.31621	0.0855922	3.69438	0.000220428	0.0104594	1.24506	111227
ENSMUSG00000039106	Htr5a	27841947	27855086	45.53	protein_coding	5-hydroxytryptamine (serotonin) receptor 5A	295.916	0.316071	0.101689	3.10822	0.00188216	0.0442132	1.24494	13139
ENSMUSG00000027298	Tyro3	119797733	119818104	52.76	protein_coding	TYRO3 protein tyrosine kinase 3	1244.49	0.315081	0.086277	3.65197	0.000260232	0.0116454	1.24408	20371
ENSMUSG00000039059	Hrh3	180099465	180104488	59.99	protein_coding	histamine receptor H3	284.005	0.314591	0.109108	2.88329	0.00393541	0.0677721	1.24366	5023
ENSMUSG00000027220	Syt13	92915098	92956058	49.03	protein_coding	synaptotagmin XIII	2422.73	0.313915	0.104649	2.99971	0.0027024	0.053597	1.24308	40960
ENSMUSG00000034075	Zdhhc5	84687970	84715180	41.7	protein_coding	zinc finger, DHHC domain containing 5	862.978	0.313581	0.0646321	4.85178	1.22355e-06	0.00020126	1.24279	27210
ENSMUSG00000021276	Cinp	110872610	110889145	47.58	protein_coding	cyclin-dependent kinase 2 interacting protein	470.395	0.313344	0.0746358	4.1983	2.68926e-05	0.00211328	1.24258	16535
ENSMUSG00000002307	Daxx	33909414	33915589	53.63	protein_coding	Fas death domain-associated protein	244.244	0.313262	0.0917688	3.4136	0.000641117	0.022452	1.24251	6175
ENSMUSG00000020440	Arf5	28423560	28426602	56.82	protein_coding	ADP-ribosylation factor 5	768.814	0.311879	0.110834	2.81394	0.00489378	0.0774042	1.24132	3042
ENSMUSG00000006736	Tspan31	127067317	127070261	49.68	protein_coding	tetraspanin 31	513.385	0.311248	0.10342	3.00954	0.00261645	0.0524913	1.24078	2944
ENSMUSG00000021360	Gcnt2	40859768	40960891	45.16	protein_coding	glucosaminyl (N-acetyl) transferase 2, I-branching enzyme	225.609	0.311184	0.112593	2.7638	0.00571324	0.0861509	1.24073	101123
ENSMUSG00000030726	Pold3	100082111	100121565	42.77	protein_coding	polymerase (DNA-directed), delta 3, accessory subunit	322.15	0.311142	0.104617	2.97411	0.00293836	0.0565817	1.24069	39454
ENSMUSG00000066900	Suds3	117091682	117115993	52.36	protein_coding	suppressor of defective silencing 3 homolog (S. cerevisiae)	1088	0.310404	0.079204	3.91904	8.89012e-05	0.00514997	1.24005	24311
ENSMUSG00000030707	Coro1a	126699773	126707787	54.71	protein_coding	coronin, actin binding protein 1A	713.028	0.309478	0.101619	3.04549	0.00232305	0.0494599	1.23926	8014
ENSMUSG00000034613	Ppm1h	122678762	122945795	45.82	protein_coding	protein phosphatase 1H (PP2C domain containing)	1302.04	0.309368	0.112455	2.75103	0.00594083	0.0885939	1.23917	267033
ENSMUSG00000040782	Rfwd2	159232320	159347640	36.66	protein_coding	ring finger and WD repeat domain 2	1229.17	0.307779	0.0833798	3.69129	0.000223119	0.0105295	1.2378	115320
ENSMUSG00000018167	Stard3	98358368	98381112	52.84	protein_coding	START domain containing 3	217.933	0.307581	0.0992904	3.09779	0.00194972	0.0447796	1.23763	22744
ENSMUSG00000037348	Paqr7	134496697	134510235	49.74	protein_coding	progestin and adipoQ receptor family member VII	497.783	0.307384	0.109333	2.81144	0.00493204	0.077744	1.23746	13538
ENSMUSG00000032002	Dcun1d5	7184566	7207031	37.61	protein_coding	DCN1, defective in cullin neddylation 1, domain containing 5 (S. cerevisiae)	329.892	0.307169	0.0893017	3.43968	0.000582402	0.020977	1.23728	22465
ENSMUSG00000032171	Pin1	20652130	20666584	51.26	protein_coding	protein (peptidyl-prolyl cis/trans isomerase) NIMA-interacting 1	618.81	0.306951	0.0946243	3.24389	0.00117909	0.0338441	1.23709	14454
ENSMUSG00000022426	Josd1	79674250	79687872	48.39	protein_coding	Josephin domain containing 1	679.278	0.306673	0.0850211	3.60702	0.000309737	0.0133237	1.23685	13622
ENSMUSG00000022561	Gpaa1	76331231	76334907	58.28	protein_coding	GPI anchor attachment protein 1	139.586	0.306261	0.113357	2.70173	0.00689792	0.0970914	1.2365	3676
ENSMUSG00000013646	Sh3bp5l	58330724	58347728	48.6	protein_coding	SH3 binding domain protein 5 like	516.504	0.305134	0.0874131	3.49071	0.000481742	0.0186046	1.23553	17004
ENSMUSG00000028385	Snx30	59805840	59904737	46.04	protein_coding	sorting nexin family member 30	842.822	0.304711	0.0698581	4.36186	1.28963e-05	0.00125657	1.23517	98897
ENSMUSG00000027613	Eif6	155819832	155826925	48.51	protein_coding	eukaryotic translation initiation factor 6	201.626	0.304274	0.109193	2.78658	0.00532675	0.0825634	1.2348	7093
ENSMUSG00000025372	Baiap2	119942763	120006782	52.41	protein_coding	brain-specific angiogenesis inhibitor 1-associated protein 2	2555.95	0.303515	0.0982148	3.09032	0.00199942	0.0451999	1.23415	64019
ENSMUSG00000039661	Dusp26	31089471	31097047	50.96	protein_coding	dual specificity phosphatase 26 (putative)	790.393	0.30308	0.0822109	3.68661	0.000227261	0.0106027	1.23378	7576
ENSMUSG00000062075	Lmnb2	80901203	80918245	55.65	protein_coding	lamin B2	227.916	0.302987	0.0941419	3.21841	0.00128904	0.0350112	1.2337	17042
ENSMUSG00000066026	Dhrs3	144892827	144928209	48.86	protein_coding	dehydrogenase/reductase (SDR family) member 3	162.767	0.302858	0.109168	2.77425	0.00553298	0.0840477	1.23359	35382
ENSMUSG00000051403	Ppp1r37	19530967	19562398	52.27	protein_coding	protein phosphatase 1, regulatory subunit 37	996.993	0.302511	0.0969203	3.12124	0.00180092	0.043021	1.23329	31431
ENSMUSG00000027582	Zgpat	181364928	181383628	47.12	protein_coding	zinc finger, CCCH-type with G patch domain	401.142	0.301756	0.101045	2.98635	0.00282329	0.0548216	1.23264	18700
ENSMUSG00000018865	Sult4a1	84076097	84105754	52.37	protein_coding	sulfotransferase family 4A, member 1	2765.99	0.301192	0.0690831	4.35985	1.30149e-05	0.00125657	1.23216	29657
ENSMUSG00000027333	Smox	131491496	131525922	50.43	protein_coding	spermine oxidase	253.243	0.2997	0.103335	2.90027	0.0037284	0.065949	1.23089	34426
ENSMUSG00000058070	Eml1	108370957	108539617	47.74	protein_coding	echinoderm microtubule associated protein like 1	885.297	0.299076	0.0957757	3.12267	0.0017922	0.0429602	1.23036	168660
ENSMUSG00000059475	Zfp426	20468549	20492746	42.52	protein_coding	zinc finger protein 426	455.183	0.298348	0.110301	2.70485	0.00683361	0.0965525	1.22974	24197
ENSMUSG00000039671	Zmynd8	165784152	165899016	50.42	protein_coding	zinc finger, MYND-type containing 8	1480.89	0.297921	0.107707	2.76602	0.00567445	0.0856589	1.22937	114864
ENSMUSG00000021133	4933426M11Rik	80790532	80880832	41.94	protein_coding	RIKEN cDNA 4933426M11 gene	372.043	0.297756	0.0927849	3.2091	0.00133151	0.0356686	1.22923	90300
ENSMUSG00000032220	Myo1e	70207350	70400067	45.75	protein_coding	myosin IE	308.003	0.297338	0.103874	2.86248	0.00420342	0.0707221	1.22888	192717
ENSMUSG00000024096	Ralbp1	65848433	65885755	47.06	protein_coding	ralA binding protein 1	1342.75	0.296903	0.0680932	4.36024	1.29917e-05	0.00125657	1.2285	37322
ENSMUSG00000045948	Mrps12	28739641	28741820	52.39	protein_coding	mitochondrial ribosomal protein S12	490.66	0.296539	0.0920123	3.22282	0.00126934	0.0350112	1.22819	2179
ENSMUSG00000048486	Fitm2	163466379	163472629	49.67	protein_coding	fat storage-inducing transmembrane protein 2	317.426	0.296469	0.0870153	3.40709	0.000656584	0.0228658	1.22814	6250
ENSMUSG00000043702	Pde12	26659958	26669883	41.35	protein_coding	phosphodiesterase 12	288.068	0.296265	0.0945534	3.13331	0.00172849	0.0419394	1.22796	9925
ENSMUSG00000040111	Gramd1b	40293233	40531383	45.7	protein_coding	GRAM domain containing 1B	2561.62	0.296	0.0927303	3.19205	0.00141267	0.0370372	1.22774	238150
ENSMUSG00000020032	Nuak1	84370905	84440597	47.97	protein_coding	NUAK family, SNF1-like kinase, 1	1396.41	0.295251	0.0986549	2.99276	0.00276464	0.0540779	1.2271	69692
ENSMUSG00000025724	Sec11a	80904889	80947780	43.77	protein_coding	SEC11 homolog A (S. cerevisiae)	344.468	0.295126	0.0763312	3.86639	0.000110459	0.00607347	1.22699	42891
ENSMUSG00000038780	Smurf1	144876495	144965847	48.85	protein_coding	SMAD specific E3 ubiquitin protein ligase 1	466.127	0.294792	0.0800284	3.68359	0.000229969	0.0106575	1.22671	89352
ENSMUSG00000026313	Hdac4	91928779	92180341	46.43	protein_coding	histone deacetylase 4	1218.05	0.294673	0.103342	2.85145	0.00435205	0.0716127	1.22661	251562
ENSMUSG00000053841	Txlna	129626078	129641065	49.73	protein_coding	taxilin alpha	612.429	0.293254	0.0685224	4.27969	1.87156e-05	0.00165735	1.2254	14987
ENSMUSG00000032977	Fam207a	77486656	77515813	50.91	protein_coding	family with sequence similarity 207, member A	289.676	0.293118	0.0971722	3.01648	0.00255729	0.0519795	1.22529	29157
ENSMUSG00000041241	Mul1	138434671	138442265	52.78	protein_coding	mitochondrial ubiquitin ligase activator of NFKB 1	286.806	0.292738	0.10103	2.89753	0.00376117	0.0663598	1.22496	7594
ENSMUSG00000020261	Slc36a1	55204350	55236330	49.19	protein_coding	solute carrier family 36 (proton/amino acid symporter), member 1	564.533	0.292727	0.108722	2.69243	0.00709324	0.0991129	1.22495	31980
ENSMUSG00000037204	Atg101	101284301	101290934	49.85	protein_coding	autophagy related 101	211.912	0.292617	0.10246	2.8559	0.00429144	0.0714747	1.22486	6633
ENSMUSG00000094626	Cecr6	120488939	120493807	59.33	protein_coding	cat eye syndrome chromosome region, candidate 6	592.808	0.292429	0.0961108	3.04262	0.00234526	0.0496289	1.2247	4868
ENSMUSG00000022185	Acin1	54642161	54686931	45.59	protein_coding	apoptotic chromatin condensation inducer 1	1354.31	0.291402	0.0741589	3.92943	8.51472e-05	0.00498756	1.22383	44770
ENSMUSG00000031788	Kifc3	95099832	95142540	51.51	protein_coding	kinesin family member C3	436.291	0.291361	0.0924091	3.15295	0.00161632	0.0403418	1.22379	42708
ENSMUSG00000024072	Yipf4	74489493	74500277	39.2	protein_coding	Yip1 domain family, member 4	359.064	0.289499	0.0854744	3.38696	0.000706708	0.0239643	1.22222	10784
ENSMUSG00000038205	Prkab2	97658193	97673812	45.74	protein_coding	protein kinase, AMP-activated, beta 2 non-catalytic subunit	433.758	0.289213	0.0814169	3.55225	0.000381954	0.0154564	1.22197	15619
ENSMUSG00000024539	Ptpn2	67665511	67724595	41.08	protein_coding	protein tyrosine phosphatase, non-receptor type 2	307.985	0.288879	0.0974359	2.96481	0.00302866	0.0579993	1.22169	59084
ENSMUSG00000026820	Ptges2	32395896	32405772	53.45	protein_coding	prostaglandin E synthase 2	190.644	0.288803	0.103395	2.7932	0.00521902	0.0813646	1.22163	9876
ENSMUSG00000026457	Adipor1	134415378	134433351	46.2	protein_coding	adiponectin receptor 1	675.583	0.288712	0.0952042	3.03255	0.00242494	0.0502443	1.22155	17973
ENSMUSG00000022951	Rcan1	92391953	92466146	49.85	protein_coding	regulator of calcineurin 1	488.199	0.288346	0.0963533	2.9926	0.00276616	0.0540779	1.22124	74193
ENSMUSG00000030811	Fbxl19	127745201	127769476	51.97	protein_coding	F-box and leucine-rich repeat protein 19	695.523	0.286917	0.0752589	3.8124	0.000137626	0.00713962	1.22003	24275
ENSMUSG00000040325	Vprbp	106821874	106880992	40.84	protein_coding	Vpr (HIV-1) binding protein	775.919	0.286662	0.0896901	3.19614	0.00139282	0.0366749	1.21981	59118
ENSMUSG00000020246	Hcfc2	82696160	82742428	40.78	protein_coding	host cell factor C2	517.28	0.28625	0.0989099	2.89405	0.00380312	0.0665815	1.21947	46268
ENSMUSG00000005069	Pex5	124396816	124415067	47.32	protein_coding	peroxisomal biogenesis factor 5	450.165	0.286015	0.0824629	3.4684	0.000523559	0.0197633	1.21927	18251
ENSMUSG00000024097	Srsf7	80200089	80207305	41.78	protein_coding	serine/arginine-rich splicing factor 7	732.436	0.285923	0.100736	2.83834	0.00453483	0.073568	1.21919	7216
ENSMUSG00000095567	Noc2l	156236010	156247616	51.86	protein_coding	nucleolar complex associated 2 homolog (S. cerevisiae)	851.655	0.285437	0.0752293	3.79423	0.000148105	0.00757024	1.21878	11606
ENSMUSG00000071649	B3gat3	8920374	8927234	48.03	protein_coding	beta-1,3-glucuronyltransferase 3 (glucuronosyltransferase I)	749.743	0.28508	0.0694975	4.10202	4.09553e-05	0.0029318	1.21848	6860
ENSMUSG00000038187	Btbd10	113315626	113369392	36.35	protein_coding	BTB (POZ) domain containing 10	1220.73	0.283586	0.0838598	3.38167	0.00072047	0.0243715	1.21722	53766
ENSMUSG00000041297	Cdk13	17715962	17805097	37.06	protein_coding	cyclin-dependent kinase 13	1597.88	0.283322	0.0736052	3.84922	0.000118497	0.00636085	1.21699	89135
ENSMUSG00000028035	Dnajb4	152178511	152210279	39.92	protein_coding	DnaJ (Hsp40) homolog, subfamily B, member 4	1315.08	0.283141	0.0884107	3.20256	0.00136212	0.0361403	1.21684	31768
ENSMUSG00000059974	Ntm	28994750	29963141	42.68	protein_coding	neurotrimin	4514.29	0.282069	0.0870365	3.24082	0.00119188	0.0339565	1.21594	968391
ENSMUSG00000026127	Imp4	34439851	34449356	46.81	protein_coding	IMP4, U3 small nucleolar ribonucleoprotein, homolog (yeast)	266.982	0.281817	0.0836195	3.37023	0.000751063	0.0251307	1.21572	9505
ENSMUSG00000019907	Ppp1r12a	108162400	108277575	38.74	protein_coding	protein phosphatase 1, regulatory (inhibitor) subunit 12A	3489.97	0.280931	0.0673969	4.16831	3.06873e-05	0.00235716	1.21498	115175
ENSMUSG00000032624	Eml4	83350931	83480361	40.79	protein_coding	echinoderm microtubule associated protein like 4	750.841	0.280749	0.0798623	3.51541	0.000439081	0.0172445	1.21483	129430
ENSMUSG00000004360	9330159F19Rik	29211643	29230779	37.14	protein_coding	RIKEN cDNA 9330159F19 gene	1337.75	0.280464	0.064603	4.34134	1.41616e-05	0.00133033	1.21459	19136
ENSMUSG00000021484	Lman2	55343833	55362783	50.7	protein_coding	lectin, mannose-binding 2	770.371	0.28025	0.0854899	3.27816	0.00104485	0.031745	1.21441	18950
ENSMUSG00000003868	Ruvbl2	45421852	45438096	54.15	protein_coding	RuvB-like protein 2	236.159	0.279773	0.0973118	2.87502	0.00404007	0.0690038	1.214	16244
ENSMUSG00000021518	Ptdss1	66932830	66998401	42.27	protein_coding	phosphatidylserine synthase 1	811.653	0.279708	0.0833545	3.35564	0.000791814	0.0262109	1.21395	65571
ENSMUSG00000040102	Klhl42	147091379	147112778	47.23	protein_coding	kelch-like 42	478.439	0.279297	0.0860568	3.2455	0.00117244	0.0338441	1.2136	21399
ENSMUSG00000029392	Rilpl1	124493082	124531391	50.41	protein_coding	Rab interacting lysosomal protein-like 1	1007.94	0.278194	0.0914766	3.04115	0.00235673	0.0497201	1.21268	38309
ENSMUSG00000000001	Gnai3	108107280	108146146	41.65	protein_coding	guanine nucleotide binding protein (G protein), alpha inhibiting 3	589.856	0.277993	0.0925046	3.00519	0.00265419	0.053019	1.21251	38866
ENSMUSG00000026021	Sumo1	59586558	59670834	42.85	protein_coding	SMT3 suppressor of mif two 3 homolog 1 (yeast)	1025.35	0.276439	0.0765564	3.61092	0.000305112	0.0131738	1.2112	84276
ENSMUSG00000028876	Epha10	124880899	124917800	51.33	protein_coding	Eph receptor A10	368.523	0.275649	0.0977955	2.81863	0.00482288	0.0770034	1.21054	36901
ENSMUSG00000042650	Alkbh5	60536381	60558512	45.23	protein_coding	alkB, alkylation repair homolog 5 (E. coli)	671.02	0.275102	0.0801413	3.43272	0.000597568	0.0214677	1.21008	22131
ENSMUSG00000003226	Ranbp2	58446852	58494155	37.23	protein_coding	RAN binding protein 2	6183.29	0.275051	0.0686829	4.00465	6.2109e-05	0.00397927	1.21004	47303
ENSMUSG00000021037	Ahsa1	87266746	87273997	47.52	protein_coding	AHA1, activator of heat shock protein ATPase 1	1626.42	0.274356	0.0730056	3.75801	0.000171271	0.00853467	1.20945	7251
ENSMUSG00000028086	Fbxw7	84815268	84979198	39.48	protein_coding	F-box and WD-40 domain protein 7	5654.69	0.274318	0.0767556	3.57391	0.000351686	0.01443	1.20942	163930
ENSMUSG00000051726	Kcnf1	17172100	17176888	54.17	protein_coding	potassium voltage-gated channel, subfamily F, member 1	1554.28	0.273525	0.0806555	3.39127	0.000695691	0.0237646	1.20876	4788
ENSMUSG00000017801	Mlx	101087277	101092207	50.7	protein_coding	MAX-like protein X	234.659	0.273124	0.0943275	2.89549	0.00378568	0.0664193	1.20842	4930
ENSMUSG00000035529	Prdm4	85891970	85916945	43.27	protein_coding	PR domain containing 4	426.361	0.273123	0.0899301	3.03706	0.00238901	0.0498715	1.20842	24975
ENSMUSG00000039987	Phtf2	20758663	20882124	39.6	protein_coding	putative homeodomain transcription factor 2	302.325	0.271952	0.0959856	2.83326	0.00460758	0.0743146	1.20744	123461
ENSMUSG00000028890	Mtf1	124802104	124849800	47.6	protein_coding	metal response element binding transcription factor 1	497.183	0.271476	0.0856627	3.16913	0.00152895	0.0391474	1.20704	47696
ENSMUSG00000025234	Arih1	59388258	59486618	37.71	protein_coding	ariadne ubiquitin-conjugating enzyme E2 binding protein homolog 1 (Drosophila)	1579.75	0.271409	0.070022	3.87606	0.000106162	0.00599987	1.20699	98360
ENSMUSG00000024081	Cebpz	78919006	78937070	41.25	protein_coding	CCAAT/enhancer binding protein zeta	820.059	0.271195	0.0654029	4.14652	3.37561e-05	0.00250969	1.20681	18064
ENSMUSG00000019370	Calm3	16915379	16924114	57.38	protein_coding	calmodulin 3	24455.6	0.271107	0.0894768	3.02992	0.00244622	0.0504597	1.20673	8735
ENSMUSG00000028541	B4galt2	117869260	117883487	54.13	protein_coding	UDP-Gal:betaGlcNAc beta 1,4- galactosyltransferase, polypeptide 2	424.841	0.270737	0.0917568	2.95059	0.00317165	0.0597104	1.20642	14227
ENSMUSG00000030870	Ubfd1	122067175	122082194	44.91	protein_coding	ubiquitin family domain containing 1	770.828	0.27068	0.0726885	3.72383	0.000196219	0.00950535	1.20638	15019
ENSMUSG00000005674	Tomm40l	171216011	171222514	52.18	protein_coding	translocase of outer mitochondrial membrane 40 homolog-like (yeast)	502.27	0.269611	0.0752308	3.58379	0.000338643	0.0140124	1.20548	6503
ENSMUSG00000030062	Rpn1	88084473	88105304	46.67	protein_coding	ribophorin I	1398.6	0.26858	0.0987704	2.71923	0.00654336	0.0941447	1.20462	20831
ENSMUSG00000003153	Slc2a3	122727809	122801640	45.39	protein_coding	solute carrier family 2 (facilitated glucose transporter), member 3	1876.69	0.268393	0.0913092	2.93939	0.00328859	0.0612886	1.20447	73831
ENSMUSG00000031781	Ciapin1	94819818	94838358	47.24	protein_coding	cytokine induced apoptosis inhibitor 1	394.446	0.268139	0.0883836	3.03381	0.00241489	0.0501857	1.20425	18540
ENSMUSG00000029635	Cdk8	146231230	146302874	42.81	protein_coding	cyclin-dependent kinase 8	552.603	0.268043	0.0817644	3.27823	0.0010446	0.031745	1.20417	71644
ENSMUSG00000070372	Capza1	104822779	104864505	40.78	protein_coding	capping protein (actin filament) muscle Z-line, alpha 1	401.183	0.267744	0.080965	3.3069	0.00094333	0.0293403	1.20392	41726
ENSMUSG00000028842	Ago3	126331704	126429556	39.14	protein_coding	argonaute RISC catalytic subunit 3	1033.34	0.267633	0.0940765	2.84484	0.00444333	0.0722024	1.20383	97852
ENSMUSG00000027305	Ndufaf1	119655446	119662827	43.58	protein_coding	NADH dehydrogenase (ubiquinone) 1 alpha subcomplex, assembly factor 1	247.238	0.267601	0.0878533	3.04599	0.00231912	0.0494521	1.2038	7381
ENSMUSG00000031068	Glrx3	137437648	137468594	44.26	protein_coding	glutaredoxin 3	884.497	0.266485	0.0683734	3.89749	9.7195e-05	0.00556092	1.20287	30946
ENSMUSG00000063146	Clip2	134489386	134552434	51.51	protein_coding	CAP-GLY domain containing linker protein 2	2003.31	0.266455	0.0859931	3.09856	0.00194461	0.0447796	1.20285	63048
ENSMUSG00000031442	Mcf2l	12873806	13020905	51.79	protein_coding	mcf.2 transforming sequence-like	2487.56	0.266218	0.0823059	3.2345	0.00121856	0.0343644	1.20265	147099
ENSMUSG00000034566	Atp5h	115415689	115419962	48.13	protein_coding	ATP synthase, H+ transporting, mitochondrial F0 complex, subunit D	2061.88	0.265507	0.0776807	3.41792	0.000631018	0.0222553	1.20206	4273
ENSMUSG00000027678	Ncoa3	165992636	166073242	44.41	protein_coding	nuclear receptor coactivator 3	622.851	0.264836	0.0875124	3.02627	0.00247593	0.0509969	1.2015	80606
ENSMUSG00000063663	Brwd3	108737016	108834372	35.86	protein_coding	bromodomain and WD repeat domain containing 3	502.218	0.264263	0.0853725	3.09541	0.00196541	0.0450167	1.20102	97356
ENSMUSG00000025232	Hexa	59539667	59565105	46.98	protein_coding	hexosaminidase A	513.326	0.263447	0.0972542	2.70885	0.00675164	0.0960779	1.20034	25438
ENSMUSG00000050855	Zfp940	29833620	29853669	44.27	protein_coding	zinc finger protein 940	309.151	0.263306	0.0966024	2.72567	0.00641707	0.0935507	1.20023	20049
ENSMUSG00000052214	Opa3	19228334	19256543	49.11	protein_coding	optic atrophy 3	550.166	0.263216	0.0833312	3.15867	0.00158493	0.039919	1.20015	28209
ENSMUSG00000090935	Synj2bp	81497941	81532911	39.2	protein_coding	synaptojanin 2 binding protein	1040.04	0.263199	0.0637045	4.13156	3.60302e-05	0.00263647	1.20014	34970
ENSMUSG00000051469	Zfp191	24009702	24020810	42.24	protein_coding	zinc finger protein 191	731.569	0.262456	0.0815502	3.21834	0.00128934	0.0350112	1.19952	11108
ENSMUSG00000025475	Gpr123	139834174	139878088	49.63	protein_coding	G protein-coupled receptor 123	1204.74	0.262412	0.0905496	2.898	0.00375555	0.0663448	1.19948	43914
ENSMUSG00000036097	Fam178a	44931119	44983787	41.17	protein_coding	family with sequence similarity 178, member A	1066.02	0.262098	0.0914918	2.86472	0.00417379	0.0705939	1.19922	52668
ENSMUSG00000021111	Papola	105784694	105838944	40.64	protein_coding	poly (A) polymerase alpha	1487.23	0.261981	0.0903246	2.90044	0.0037264	0.065949	1.19912	54250
ENSMUSG00000038150	Ormdl3	98581256	98587368	55.34	protein_coding	ORM1-like 3 (S. cerevisiae)	421.531	0.261856	0.095347	2.74635	0.00602626	0.0894163	1.19902	6112
ENSMUSG00000042363	Lgalsl	20823576	20831056	44.34	protein_coding	lectin, galactoside binding-like	1358.35	0.261445	0.0644322	4.05767	4.95652e-05	0.00332358	1.19868	7480
ENSMUSG00000039473	Ubn1	5050068	5086285	42.81	protein_coding	ubinuclein 1	949.051	0.260637	0.0639284	4.07701	4.56178e-05	0.00317112	1.19801	36217
ENSMUSG00000026626	Ppp2r5a	191351975	191403272	42.83	protein_coding	protein phosphatase 2, regulatory subunit B', alpha	1211.99	0.259744	0.0746098	3.48136	0.000498868	0.0190543	1.19727	51297
ENSMUSG00000022601	Zbtb11	55973883	56008913	40.94	protein_coding	zinc finger and BTB domain containing 11	1410.34	0.259671	0.0585663	4.43379	9.25907e-06	0.000990222	1.19721	35030
ENSMUSG00000027722	Spata5	37419896	37579096	37.53	protein_coding	spermatogenesis associated 5	254.589	0.258864	0.0869296	2.97785	0.00290274	0.0560512	1.19654	159200
ENSMUSG00000039804	Ncoa5	165000357	165034867	44.28	protein_coding	nuclear receptor coactivator 5	498.228	0.258736	0.0887244	2.91617	0.00354352	0.0643153	1.19643	34510
ENSMUSG00000022160	Mettl3	52294668	52305128	42.87	protein_coding	methyltransferase like 3	227.76	0.258396	0.0933545	2.7679	0.00564187	0.0853524	1.19615	10460
ENSMUSG00000046691	Chtf8	106883863	106893601	47.33	protein_coding	CTF8, chromosome transmission fidelity factor 8	693.742	0.258053	0.0880702	2.93008	0.00338878	0.0623844	1.19586	9738
ENSMUSG00000022354	Ndufb9	58933810	58939489	47.25	protein_coding	NADH dehydrogenase (ubiquinone) 1 beta subcomplex, 9	1471.08	0.257929	0.0821139	3.14111	0.00168308	0.0412695	1.19576	5679
ENSMUSG00000022538	Lsg1	30560494	30587592	45.58	protein_coding	large subunit GTPase 1 homolog (S. cerevisiae)	268.317	0.257458	0.0944852	2.72485	0.00643308	0.0935507	1.19537	27098
ENSMUSG00000037235	Mxd4	34173887	34187720	52.88	protein_coding	Max dimerization protein 4	650.879	0.257253	0.0819799	3.138	0.00170105	0.0415635	1.1952	13833
ENSMUSG00000048701	Ccdc6	70097121	70193200	47.99	protein_coding	coiled-coil domain containing 6	775.631	0.257031	0.0714681	3.59645	0.000322592	0.0136738	1.19502	96079
ENSMUSG00000074886	Grk6	55445334	55460925	53.57	protein_coding	G protein-coupled receptor kinase 6	447.446	0.256985	0.0726628	3.53669	0.00040518	0.0161874	1.19498	15591
ENSMUSG00000056692	D17Wsu92e	27751232	27820558	47.76	protein_coding	DNA segment, Chr 17, Wayne State University 92, expressed	2692.12	0.256664	0.0886496	2.89526	0.00378843	0.0664193	1.19471	69326
ENSMUSG00000024213	Nudt3	27579382	27623465	49.87	protein_coding	nudix (nucleotide diphosphate linked moiety X)-type motif 3	2438.07	0.256401	0.0741685	3.457	0.000546225	0.0200307	1.19449	44083
ENSMUSG00000032536	Trak1	121366958	121474916	50.18	protein_coding	trafficking protein, kinesin binding 1	1821.72	0.255578	0.078489	3.25623	0.00112902	0.0331343	1.19381	107958
ENSMUSG00000007950	Abhd8	71456700	71463657	54.7	protein_coding	abhydrolase domain containing 8	1076.88	0.254126	0.0879507	2.88941	0.00385964	0.0668534	1.19261	6957
ENSMUSG00000030704	Rab6a	100607410	100641268	38.57	protein_coding	RAB6A, member RAS oncogene family	7116.54	0.253496	0.0823302	3.07902	0.00207682	0.0461985	1.19209	33858
ENSMUSG00000037857	Nufip2	77686155	77741921	41.32	protein_coding	nuclear fragile X mental retardation protein interacting protein 2	1464.28	0.252429	0.0552778	4.56656	4.95798e-06	0.000599398	1.19121	55766
ENSMUSG00000038145	Snrk	122117283	122169702	45.26	protein_coding	SNF related kinase	1267.9	0.252007	0.068898	3.65768	0.000254505	0.0115702	1.19086	52419
ENSMUSG00000026202	Tuba4a	75214228	75219865	53.94	protein_coding	tubulin, alpha 4A	3161.02	0.251924	0.0702231	3.58748	0.000333884	0.0138836	1.19079	5637
ENSMUSG00000056608	Chd9	90828835	91054508	42.15	protein_coding	chromodomain helicase DNA binding protein 9	2269.8	0.251498	0.0878494	2.86283	0.00419878	0.0707221	1.19044	225673
ENSMUSG00000041846	Smek1	101039409	101083702	39.5	protein_coding	SMEK homolog 1, suppressor of mek1 (Dictyostelium)	812.984	0.251264	0.0759224	3.30949	0.000934664	0.0292014	1.19025	44293
ENSMUSG00000074129	Rpl13a	45125558	45136231	52.27	protein_coding	ribosomal protein L13A	1793.57	0.251054	0.0830674	3.0223	0.00250866	0.0515183	1.19008	10673
ENSMUSG00000027088	Phospho2	69789623	69800005	40.64	protein_coding	phosphatase, orphan 2	329.738	0.251016	0.0770919	3.25607	0.00112966	0.0331343	1.19005	10382
ENSMUSG00000024063	Lbh	72918305	72941942	46.96	protein_coding	limb-bud and heart	551.693	0.250179	0.0895697	2.79312	0.00522026	0.0813646	1.18935	23637
ENSMUSG00000029060	Mib2	155654677	155669198	53.07	protein_coding	mindbomb homolog 2 (Drosophila)	864.5	0.248828	0.0856675	2.90458	0.00367742	0.0654759	1.18824	14521
ENSMUSG00000063895	Nupl1	60219204	60251507	37.38	protein_coding	nucleoporin like 1	786.697	0.248739	0.0642203	3.87321	0.000107412	0.00600549	1.18817	32303
ENSMUSG00000004056	Akt2	27591552	27640826	50.71	protein_coding	thymoma viral proto-oncogene 2	644.394	0.248342	0.0902277	2.75239	0.00591615	0.0884433	1.18784	49274
ENSMUSG00000037926	Ssh2	77216287	77460220	39.76	protein_coding	slingshot homolog 2 (Drosophila)	999.076	0.247847	0.0865781	2.8627	0.00420049	0.0707221	1.18743	243933
ENSMUSG00000027581	Stmn3	181306459	181314500	49.63	protein_coding	stathmin-like 3	3358.04	0.247349	0.0828452	2.98568	0.0028295	0.0548656	1.18702	8041
ENSMUSG00000024966	Stip1	7020696	7040026	45.97	protein_coding	stress-induced phosphoprotein 1	2730.08	0.246922	0.073625	3.35378	0.000797168	0.0262833	1.18667	19330
ENSMUSG00000003382	Etv3	87525407	87540156	47.97	protein_coding	ets variant 3	365.104	0.245965	0.0862834	2.85066	0.00436279	0.0716127	1.18589	14749
ENSMUSG00000040009	Gnaz	74967177	75016907	53.46	protein_coding	guanine nucleotide binding protein, alpha z subunit	1842.57	0.245384	0.0752999	3.25876	0.00111899	0.0329605	1.18541	49730
ENSMUSG00000042772	Smg7	152836995	152902646	39	protein_coding	Smg-7 homolog, nonsense mediated mRNA decay factor (C. elegans)	1878.51	0.245	0.0871363	2.81168	0.00492832	0.077744	1.18509	65651
ENSMUSG00000027865	Gdap2	100162381	100206981	42.44	protein_coding	ganglioside-induced differentiation-associated-protein 2	496.673	0.243791	0.0785927	3.10196	0.00192247	0.0445467	1.1841	44600
ENSMUSG00000024754	Tmem2	21778342	21858327	43.91	protein_coding	transmembrane protein 2	412.435	0.243084	0.0891569	2.72647	0.00640152	0.0935507	1.18352	79985
ENSMUSG00000034854	Mfsd12	81357491	81366225	58.19	protein_coding	major facilitator superfamily domain containing 12	367.637	0.242904	0.0872716	2.78331	0.00538076	0.0829364	1.18337	8734
ENSMUSG00000041229	Phf8	151520672	151633859	39.36	protein_coding	PHD finger protein 8	437.496	0.24285	0.0856265	2.83615	0.00456607	0.0738163	1.18333	113187
ENSMUSG00000026203	Dnajb2	75236406	75245692	52.02	protein_coding	DnaJ (Hsp40) homolog, subfamily B, member 2	623.777	0.242633	0.0709806	3.4183	0.000630148	0.0222553	1.18315	9286
ENSMUSG00000044600	Smim7	72565188	72571088	48.16	protein_coding	small integral membrane protein 7	682.367	0.241987	0.0872077	2.77483	0.00552306	0.0840477	1.18262	5900
ENSMUSG00000020496	Rnf187	58932288	58938916	52.83	protein_coding	ring finger protein 187	1927.93	0.241809	0.0846728	2.85581	0.0042927	0.0714747	1.18247	6628
ENSMUSG00000039662	Icmt	152297227	152307121	53.38	protein_coding	isoprenylcysteine carboxyl methyltransferase	681.771	0.241678	0.0705282	3.42668	0.000611014	0.0217819	1.18237	9894
ENSMUSG00000049339	Fam134a	75142778	75147913	52.76	protein_coding	family with sequence similarity 134, member A	1124.2	0.241638	0.088658	2.7255	0.00642036	0.0935507	1.18233	5135
ENSMUSG00000038291	Snx25	46033261	46152159	42.75	protein_coding	sorting nexin 25	745.919	0.240907	0.0657834	3.66212	0.000250135	0.0114396	1.18174	118898
ENSMUSG00000038279	Nop2	125131883	125144753	50.42	protein_coding	NOP2 nucleolar protein	375.875	0.240905	0.0798154	3.01828	0.00254218	0.0518699	1.18173	12870
ENSMUSG00000016831	Tox4	52279146	52296391	43.37	protein_coding	TOX high mobility group box family member 4	988.14	0.240867	0.0748827	3.21659	0.00129725	0.0350981	1.1817	17245
ENSMUSG00000026353	Ubxn4	128243964	128279378	40.77	protein_coding	UBX domain protein 4	1000.82	0.240164	0.0732222	3.27994	0.00103831	0.0317266	1.18113	35414
ENSMUSG00000037343	Taf2	55015129	55072152	41.21	protein_coding	TAF2 RNA polymerase II, TATA box binding protein (TBP)-associated factor	667.356	0.239877	0.0746615	3.21286	0.0013142	0.0354693	1.18089	57023
ENSMUSG00000026360	Rgs2	143999338	144004161	43.62	protein_coding	regulator of G-protein signaling 2	656.69	0.2391	0.0860725	2.77789	0.00547129	0.0836825	1.18026	4823
ENSMUSG00000027680	Fxr1	34020079	34069342	37.55	protein_coding	fragile X mental retardation gene 1, autosomal homolog	1364.71	0.23904	0.0755652	3.16337	0.00155957	0.0395669	1.18021	49263
ENSMUSG00000024248	Cox7a2l	83501919	83514333	45.07	protein_coding	cytochrome c oxidase subunit VIIa polypeptide 2-like	1239.79	0.238468	0.0857136	2.78215	0.00540004	0.0831414	1.17974	12414
ENSMUSG00000027944	Hax1	89995457	89998686	46.53	protein_coding	HCLS1 associated X-1	492.332	0.238093	0.0768553	3.09794	0.00194872	0.0447796	1.17943	3229
ENSMUSG00000037514	Pank2	131262495	131299188	42.4	protein_coding	pantothenate kinase 2	801.176	0.236454	0.062059	3.81014	0.000138888	0.00717829	1.17809	36693
ENSMUSG00000050821	Fam131a	20693282	20703048	51.87	protein_coding	family with sequence similarity 131, member A	2292.23	0.235688	0.0738062	3.19333	0.00140641	0.0369628	1.17747	9766
ENSMUSG00000028132	Tmem56	121201761	121283098	43.86	protein_coding	transmembrane protein 56	1330.42	0.235639	0.0762877	3.08882	0.00200955	0.0452326	1.17743	81337
ENSMUSG00000005936	Kctd20	28951950	28969549	48.64	protein_coding	potassium channel tetramerisation domain containing 20	683.825	0.234965	0.0751335	3.1273	0.00176422	0.0426574	1.17688	17599
ENSMUSG00000042719	Naa25	121397936	121444378	46.72	protein_coding	N(alpha)-acetyltransferase 25, NatB auxiliary subunit	874.677	0.234655	0.0590357	3.9748	7.04391e-05	0.00433325	1.17663	46442
ENSMUSG00000033629	Ptplad1	64986985	65021717	44.74	protein_coding	protein tyrosine phosphatase-like A domain containing 1	2128.34	0.232828	0.0841287	2.76752	0.00564845	0.0853591	1.17514	34732
ENSMUSG00000018572	Phf23	69995777	70000009	58.61	protein_coding	PHD finger protein 23	340.099	0.232296	0.0820928	2.82968	0.00465948	0.0748045	1.1747	4232
ENSMUSG00000032115	Hyou1	44379490	44392369	51.04	protein_coding	hypoxia up-regulated 1	1849.7	0.232145	0.0801443	2.89659	0.00377243	0.06639	1.17458	12879
ENSMUSG00000024528	Srfbp1	52465693	52490738	40.77	protein_coding	serum response factor binding protein 1	335.951	0.23174	0.0846392	2.73798	0.00618181	0.0910442	1.17425	25045
ENSMUSG00000060227	Casc4	121866970	121936220	39.76	protein_coding	cancer susceptibility candidate 4	2454.02	0.231526	0.0838938	2.75975	0.00578451	0.0868488	1.17408	69250
ENSMUSG00000078515	Ddi2	141677549	141723419	45.74	protein_coding	DNA-damage inducible protein 2	845.433	0.230891	0.0713816	3.2346	0.00121811	0.0343644	1.17356	45870
ENSMUSG00000074918	Inafm2	118745758	118748810	55.58	antisense	InaF motif containing 2	416.76	0.230835	0.0706295	3.26825	0.00108213	0.0322852	1.17351	3052
ENSMUSG00000019731	Slc35e1	72480641	72492614	50.63	protein_coding	solute carrier family 35, member E1	799.375	0.230618	0.0704565	3.2732	0.00106339	0.0319316	1.17334	11973
ENSMUSG00000022075	Rhobtb2	69784990	69805530	49.92	protein_coding	Rho-related BTB domain containing 2	1282.66	0.230286	0.0728409	3.1615	0.00156959	0.0396765	1.17307	20540
ENSMUSG00000024780	Cdc37l1	28990494	29017569	40.43	protein_coding	cell division cycle 37-like 1	832.636	0.229537	0.0700778	3.27546	0.00105489	0.031745	1.17246	27075
ENSMUSG00000063317	Usp31	121642021	121707253	41.21	protein_coding	ubiquitin specific peptidase 31	2570.91	0.228825	0.0762091	3.0026	0.00267686	0.0533187	1.17188	65232
ENSMUSG00000033658	Ddx19b	111003188	111031751	44.06	protein_coding	DEAD (Asp-Glu-Ala-Asp) box polypeptide 19b	559.479	0.228729	0.0683953	3.34422	0.000825143	0.0268037	1.1718	28563
ENSMUSG00000032470	Mras	99385420	99437381	48.44	protein_coding	muscle and microspikes RAS	2312.24	0.227999	0.0826033	2.76016	0.00577723	0.0868334	1.17121	51961
ENSMUSG00000071172	Srsf3	29032673	29043366	40.69	protein_coding	serine/arginine-rich splicing factor 3	1496.95	0.227719	0.0687757	3.31104	0.000929493	0.0291053	1.17098	10693
ENSMUSG00000015214	Mtmr1	71364760	71419196	40.02	protein_coding	myotubularin related protein 1	598.288	0.227147	0.0765259	2.96824	0.00299514	0.0575953	1.17052	54436
ENSMUSG00000038619	Ensa	95624980	95632102	46.36	protein_coding	endosulfine alpha	3173.94	0.224947	0.0706614	3.18345	0.0014553	0.0378188	1.16873	7122
ENSMUSG00000035900	Gramd4	86057695	86137634	52.63	protein_coding	GRAM domain containing 4	455.349	0.224506	0.0776175	2.89247	0.00382227	0.0667471	1.16838	79939
ENSMUSG00000039485	Tspyl4	34297442	34301320	49.06	protein_coding	TSPY-like 4	7830.11	0.224003	0.0645612	3.46963	0.000521175	0.0197455	1.16797	3878
ENSMUSG00000026102	Inpp1	52785427	52817688	42.6	protein_coding	inositol polyphosphate-1-phosphatase	464.151	0.22367	0.0822757	2.71855	0.00655693	0.0941447	1.1677	32261
ENSMUSG00000036707	Cab39	85793441	85851576	41.52	protein_coding	calcium binding protein 39	3488.33	0.223416	0.0609325	3.66662	0.000245782	0.0112776	1.16749	58135
ENSMUSG00000007989	Fzd3	65201026	65262463	39.61	protein_coding	frizzled homolog 3 (Drosophila)	2099.12	0.223198	0.0803204	2.77884	0.00545527	0.0835864	1.16732	61437
ENSMUSG00000021573	Tppp	74009407	74035753	49.3	protein_coding	tubulin polymerization promoting protein	11986.4	0.222863	0.0538937	4.13523	3.54596e-05	0.00260844	1.16705	26346
ENSMUSG00000075232	Amd1	40287458	40302188	44.74	protein_coding	S-adenosylmethionine decarboxylase 1	1069.32	0.22281	0.0756142	2.94666	0.00321222	0.0602692	1.167	14730
ENSMUSG00000048874	Phf3	30802339	30873921	39.53	protein_coding	PHD finger protein 3	2556.51	0.221648	0.0728094	3.04422	0.00233282	0.0495641	1.16606	71582
ENSMUSG00000037351	Actr1b	36698114	36714422	49.83	protein_coding	ARP1 actin-related protein 1B, centractin beta	2393.11	0.221273	0.0739416	2.99254	0.0027667	0.0540779	1.16576	16308
ENSMUSG00000042751	Nmnat2	152954993	153119261	45.8	protein_coding	nicotinamide nucleotide adenylyltransferase 2	3031.21	0.220241	0.0525058	4.19461	2.73347e-05	0.00213502	1.16493	164268
ENSMUSG00000074884	Serf2	121449195	121458313	50.42	protein_coding	small EDRK-rich factor 2	577.295	0.220054	0.0788633	2.79033	0.0052655	0.0818862	1.16478	9118
ENSMUSG00000003923	Tfam	71225464	71238280	43.75	protein_coding	transcription factor A, mitochondrial	363.904	0.219871	0.0809643	2.71566	0.00661443	0.0947069	1.16463	12816
ENSMUSG00000037876	Jmjd1c	67096125	67256326	40.41	protein_coding	jumonji domain containing 1C	2231.43	0.219195	0.0758426	2.89013	0.00385083	0.066839	1.16408	160201
ENSMUSG00000002728	Naa20	145902099	145916425	42.17	protein_coding	N(alpha)-acetyltransferase 20, NatB catalytic subunit	323.434	0.219161	0.0798845	2.74347	0.00607937	0.0900122	1.16406	14326
ENSMUSG00000062421	Arf2	103966739	103985337	44.58	protein_coding	ADP-ribosylation factor 2	552.019	0.218898	0.0675972	3.23828	0.00120255	0.0340623	1.16384	18598
ENSMUSG00000022389	Tef	81802421	81826861	48.55	protein_coding	thyrotroph embryonic factor	3548.19	0.21831	0.0711413	3.06868	0.00215009	0.0470752	1.16337	24440
ENSMUSG00000003345	Csnk1g2	80622780	80640771	55.72	protein_coding	casein kinase 1, gamma 2	1634.93	0.218084	0.0789358	2.76281	0.0057307	0.0863205	1.16319	17991
ENSMUSG00000025373	Rnf41	128411616	128441438	46.33	protein_coding	ring finger protein 41	934.799	0.217553	0.0736508	2.95385	0.00313838	0.0592839	1.16276	29822
ENSMUSG00000032294	Pkm	59656368	59679375	48.14	protein_coding	pyruvate kinase, muscle	13372.5	0.217185	0.0546247	3.97594	7.01012e-05	0.00433325	1.16246	23007
ENSMUSG00000024242	Map4k3	80580512	80728093	42.88	protein_coding	mitogen-activated protein kinase kinase kinase kinase 3	1463.47	0.216411	0.0741606	2.91814	0.00352121	0.063994	1.16184	147581
ENSMUSG00000046138	9930021J03Rik	29714402	29805989	36.98	protein_coding	RIKEN cDNA 9930021J03 gene	1734.44	0.215725	0.0794647	2.71473	0.00663301	0.0948753	1.16129	91587
ENSMUSG00000029169	Dhx15	52150209	52190519	36.26	protein_coding	DEAH (Asp-Glu-Ala-His) box polypeptide 15	1336.47	0.215483	0.0525581	4.09991	4.13315e-05	0.0029318	1.16109	40310
ENSMUSG00000026858	Fam73b	30364233	30385521	53.08	protein_coding	family with sequence similarity 73, member B	614.187	0.214893	0.0752103	2.85723	0.00427351	0.0714118	1.16062	21288
ENSMUSG00000032905	Atg12	46732417	46741579	40.72	protein_coding	autophagy related 12	1049.67	0.214792	0.0695224	3.08953	0.00200473	0.0452326	1.16054	9162
ENSMUSG00000030584	Dpf1	29303951	29317588	55.1	protein_coding	D4, zinc and double PHD fingers family 1	403.986	0.214756	0.0797854	2.69167	0.00710957	0.099222	1.16051	13637
ENSMUSG00000039285	Azi2	118040499	118069794	39.78	protein_coding	5-azacytidine induced gene 2	1093.31	0.214638	0.060059	3.57379	0.00035185	0.01443	1.16041	29295
ENSMUSG00000040652	Oaz2	65668001	65690300	46.75	protein_coding	ornithine decarboxylase antizyme 2	1104.46	0.214377	0.0702935	3.04974	0.0022904	0.0490778	1.1602	22299
ENSMUSG00000028389	Zfp37	62189540	62208446	39.78	protein_coding	zinc finger protein 37	624.093	0.213821	0.0750446	2.84925	0.00438226	0.0716782	1.15976	18906
ENSMUSG00000035851	Ythdc1	86804221	86836659	35.68	protein_coding	YTH domain containing 1	1247.23	0.21373	0.0733976	2.91194	0.0035919	0.0646867	1.15968	32438
ENSMUSG00000074102	Rbm15b	106880918	106887428	56.4	protein_coding	RNA binding motif protein 15B	1041.05	0.211517	0.0607381	3.48244	0.000496869	0.0190543	1.1579	6510
ENSMUSG00000038390	Gpr162	124858444	124863917	58.31	protein_coding	G protein-coupled receptor 162	962.731	0.210544	0.0744684	2.82729	0.00469432	0.0752769	1.15712	5473
ENSMUSG00000032116	Stt3a	36729344	36767679	39.86	protein_coding	STT3, subunit of the oligosaccharyltransferase complex, homolog A (S. cerevisiae)	901.264	0.21048	0.0686714	3.06503	0.00217645	0.0474285	1.15707	38335
ENSMUSG00000040451	Sgms1	32122727	32389714	43.86	protein_coding	sphingomyelin synthase 1	585.119	0.210248	0.0734987	2.86057	0.0042288	0.0708349	1.15689	266987
ENSMUSG00000020869	Lrrc59	94629767	94645216	49.37	protein_coding	leucine rich repeat containing 59	1127.55	0.208962	0.0531876	3.92877	8.538e-05	0.00498756	1.15586	15449
ENSMUSG00000029458	Brap	121660563	121687248	46.87	protein_coding	BRCA1 associated protein	993.735	0.208409	0.0677466	3.0763	0.00209586	0.0463992	1.15541	26685
ENSMUSG00000003037	Rab8a	72161200	72183904	49.27	protein_coding	RAB8A, member RAS oncogene family	599.579	0.207738	0.0663627	3.13034	0.00174605	0.0422915	1.15488	22704
ENSMUSG00000031060	Rbm10	20617503	20650901	46	protein_coding	RNA binding motif protein 10	698.017	0.207684	0.0643134	3.22924	0.00124118	0.0347837	1.15483	33398
ENSMUSG00000044216	Kcnj4	79483718	79505241	54.24	protein_coding	potassium inwardly-rectifying channel, subfamily J, member 4	884.186	0.207287	0.0686834	3.01801	0.00254444	0.0518699	1.15452	21523
ENSMUSG00000035898	Uba6	86110720	86172803	34.68	protein_coding	ubiquitin-like modifier activating enzyme 6	601.276	0.206692	0.0640167	3.22872	0.00124344	0.0347837	1.15404	62083
ENSMUSG00000027797	Dclk1	55242526	55539064	42.52	protein_coding	doublecortin-like kinase 1	11482.3	0.205981	0.0650807	3.16501	0.00155077	0.0394156	1.15347	296538
ENSMUSG00000035877	Zhx3	160748708	160872998	42.71	protein_coding	zinc fingers and homeoboxes 3	1160.74	0.204126	0.060637	3.36636	0.000761676	0.0253339	1.15199	124290
ENSMUSG00000047694	Yipf6	98936316	98949017	41.7	protein_coding	Yip1 domain family, member 6	920.996	0.20255	0.0618962	3.27241	0.00106635	0.0319513	1.15073	12701
ENSMUSG00000029190	D5Ertd579e	36584788	36696024	44.59	protein_coding	DNA segment, Chr 5, ERATO Doi 579, expressed	2725.19	0.202462	0.0604906	3.34699	0.000816937	0.0265992	1.15066	111236
ENSMUSG00000018909	Arrb1	99535466	99606771	51.36	protein_coding	arrestin, beta 1	3111.73	0.201114	0.0742753	2.70768	0.00677558	0.09632	1.14959	71305
ENSMUSG00000049680	Urgcp	5713417	5762376	45.8	protein_coding	upregulator of cell proliferation	717.556	0.200178	0.0666621	3.00288	0.00267435	0.0533187	1.14884	48959
ENSMUSG00000044676	Zfp612	110079764	110090181	47.64	protein_coding	zinc finger protein 612	611.706	0.199017	0.0663314	3.00034	0.00269675	0.0535614	1.14792	10417
ENSMUSG00000020755	Sap30bp	115933282	115966725	50.69	protein_coding	SAP30 binding protein	592.408	0.197514	0.0641202	3.08036	0.00206748	0.0460644	1.14672	33443
ENSMUSG00000026110	Mgat4a	37439340	37541016	44.68	protein_coding	mannoside acetylglucosaminyltransferase 4, isoenzyme A	810.214	0.196111	0.0711389	2.75673	0.00583825	0.0874667	1.14561	101676
ENSMUSG00000022403	St13	81363669	81400077	39.97	protein_coding	suppression of tumorigenicity 13	2780.92	0.195456	0.0648329	3.01477	0.00257176	0.0520455	1.14509	36408
ENSMUSG00000039449	Prpf18	4622058	4652113	42.78	protein_coding	PRP18 pre-mRNA processing factor 18 homolog (yeast)	712.966	0.194784	0.0650966	2.99223	0.00276944	0.0540779	1.14455	30055
ENSMUSG00000024935	Slc1a1	28835049	28913960	44.3	protein_coding	solute carrier family 1 (neuronal/epithelial high affinity glutamate transporter, system Xag), member 1	1580.61	0.193539	0.0573408	3.37524	0.000737507	0.024827	1.14357	78911
ENSMUSG00000010453	Kansl3	36335730	36369181	45.65	protein_coding	KAT8 regulatory NSL complex subunit 3	803.328	0.193167	0.0610823	3.1624	0.00156476	0.0396264	1.14327	33451
ENSMUSG00000007415	Gatad1	3632932	3647934	41.7	protein_coding	GATA zinc finger domain containing 1	728.609	0.191155	0.0667266	2.86475	0.00417343	0.0705939	1.14168	15002
ENSMUSG00000060671	Atp8b2	89939481	89963508	51.59	protein_coding	ATPase, class I, type 8B, member 2	928.966	0.19062	0.0704531	2.70563	0.00681757	0.0965221	1.14125	24027
ENSMUSG00000022526	Zfp251	76852148	76871435	44.96	protein_coding	zinc finger protein 251	751.84	0.189629	0.0604004	3.13953	0.00169221	0.0414203	1.14047	19287
ENSMUSG00000055065	Ddx17	79527707	79546741	43.98	protein_coding	DEAD (Asp-Glu-Ala-Asp) box polypeptide 17	3110.85	0.187063	0.0671302	2.78657	0.00532687	0.0825634	1.13844	19034
ENSMUSG00000031824	6430548M08Rik	120114152	120165306	51.04	protein_coding	RIKEN cDNA 6430548M08 gene	3409.06	0.186809	0.0686427	2.72147	0.0064992	0.0939168	1.13824	51154
ENSMUSG00000007659	Bcl2l1	152780668	152831728	46.98	protein_coding	BCL2-like 1	705.413	0.186465	0.0662301	2.81541	0.00487152	0.0773004	1.13797	51060
ENSMUSG00000017707	Serinc3	163623272	163645131	42.47	protein_coding	serine incorporator 3	2703.97	0.186126	0.0573848	3.24347	0.00118084	0.0338441	1.1377	21859
ENSMUSG00000042298	Ttc19	62281473	62328451	42.18	protein_coding	tetratricopeptide repeat domain 19	1681.23	0.185211	0.063952	2.8961	0.00377829	0.0664091	1.13698	46978
ENSMUSG00000038611	Phrf1	141228784	141262750	47.1	protein_coding	PHD and ring finger domains 1	678.916	0.182498	0.0656793	2.77862	0.005459	0.0835864	1.13485	33966
ENSMUSG00000038665	Dgki	36846022	37300184	42.5	protein_coding	diacylglycerol kinase, iota	1487.76	0.179918	0.0595539	3.0211	0.00251859	0.0515699	1.13282	454162
ENSMUSG00000020088	Sar1a	61680310	61693295	44.73	protein_coding	SAR1 gene homolog A (S. cerevisiae)	1431.18	0.177128	0.0596948	2.96722	0.00300505	0.057706	1.13063	12985
ENSMUSG00000026439	Rbbp5	132477365	132505659	41.51	protein_coding	retinoblastoma binding protein 5	658.837	0.176727	0.0646378	2.73412	0.0062548	0.0919244	1.13032	28294
ENSMUSG00000026491	Ahctf1	179744894	179803680	39.69	protein_coding	AT hook containing transcription factor 1	1307.62	0.176157	0.0595963	2.95583	0.00311829	0.0590649	1.12987	58786
ENSMUSG00000029922	Mkrn1	39397804	39420462	45.12	protein_coding	makorin, ring finger protein, 1	1182.05	0.174655	0.057418	3.04181	0.00235158	0.049687	1.12869	22658
ENSMUSG00000024276	Zfp397	23954688	23964671	40.19	protein_coding	zinc finger protein 397	816.349	0.173773	0.0530135	3.2779	0.00104582	0.031745	1.128	9983
ENSMUSG00000037470	Uggt1	36140027	36244720	43.71	protein_coding	UDP-glucose glycoprotein glucosyltransferase 1	1255.47	0.172246	0.0560253	3.07444	0.00210901	0.0466162	1.12681	104693
ENSMUSG00000029053	Prkcz	155260129	155361361	49.61	protein_coding	protein kinase C, zeta	2420.48	0.170716	0.0634436	2.69082	0.00712763	0.099294	1.12562	101232
ENSMUSG00000041769	Ppp2r2d	138846079	138883057	44	protein_coding	protein phosphatase 2, regulatory subunit B, delta	612.009	0.16965	0.0622876	2.72365	0.00645644	0.0935507	1.12479	36978
ENSMUSG00000027646	Src	157418444	157471862	53.49	protein_coding	Rous sarcoma oncogene	1087.89	0.169252	0.062164	2.72266	0.00647581	0.093687	1.12448	53418
ENSMUSG00000021578	Ccdc127	74350309	74365783	42.77	protein_coding	coiled-coil domain containing 127	1085.87	0.168663	0.0615423	2.7406	0.00613266	0.0905121	1.12402	15474
ENSMUSG00000024576	Csnk1a1	61555274	61590061	39.23	protein_coding	casein kinase 1, alpha 1	4336.24	0.164761	0.0607257	2.71321	0.00666352	0.0950184	1.12098	34787
ENSMUSG00000027193	Api5	94411682	94438136	41.55	protein_coding	apoptosis inhibitor 5	1266.75	0.163153	0.0598732	2.72498	0.00643057	0.0935507	1.11973	26454
ENSMUSG00000068739	Sars	108424865	108445209	47.89	protein_coding	seryl-aminoacyl-tRNA synthetase	2954.4	0.158822	0.0578029	2.74765	0.00600246	0.0892536	1.11638	20344
ENSMUSG00000056429	Tgoln1	72608432	72617000	43.96	protein_coding	trans-golgi network protein	2677.85	0.156481	0.0579061	2.70233	0.00688562	0.09709	1.11457	8568
ENSMUSG00000026643	Nmt2	3284212	3328877	40.92	protein_coding	N-myristoyltransferase 2	1684.72	0.153751	0.054047	2.84477	0.00444439	0.0722024	1.11246	44665
ENSMUSG00000037416	Dmxl1	49832670	49965473	35.68	protein_coding	Dmx-like 1	2327.75	0.136152	0.0488842	2.7852	0.00534948	0.0827871	1.09897	132803
ENSMUSG00000027799	Nbea	55625205	56183701	38.97	protein_coding	neurobeachin	6489.36	-0.122902	0.0447742	-2.74492	0.00605252	0.0897103	0.918339	558496
ENSMUSG00000025964	Adam23	63445891	63596276	41.4	protein_coding	a disintegrin and metallopeptidase domain 23	2160.14	-0.156807	0.050596	-3.09919	0.00194049	0.0447796	0.897008	150385
ENSMUSG00000030447	Cyfip1	55841745	55930700	43.37	protein_coding	cytoplasmic FMR1 interacting protein 1	921.883	-0.193461	0.0686527	-2.81797	0.00483281	0.0770534	0.874505	88955
ENSMUSG00000034040	Wbscr17	130872082	131308078	44.22	protein_coding	Williams-Beuren syndrome chromosome region 17 homolog (human)	609.118	-0.19523	0.0702931	-2.77737	0.00547999	0.0837235	0.873433	435996
ENSMUSG00000033569	Bai3	25067476	25829707	37.58	protein_coding	brain-specific angiogenesis inhibitor 3	2371.8	-0.195952	0.0622073	-3.14999	0.00163278	0.0404645	0.872997	762231
ENSMUSG00000037487	Ubr5	37967328	38078853	40.96	protein_coding	ubiquitin protein ligase E3 component n-recognin 5	2459.15	-0.196676	0.0698394	-2.81613	0.00486067	0.0772319	0.872558	111525
ENSMUSG00000019843	Fyn	39368855	39565381	46.37	protein_coding	Fyn proto-oncogene	1140.27	-0.197079	0.0696142	-2.83102	0.00463997	0.0746638	0.872315	196526
ENSMUSG00000029571	Tmem106b	13069759	13089269	39.58	protein_coding	transmembrane protein 106B	2301.52	-0.198235	0.0730333	-2.71431	0.00664147	0.0948986	0.871616	19510
ENSMUSG00000057880	Abat	8513429	8621568	46.4	protein_coding	4-aminobutyrate aminotransferase	2370.35	-0.199168	0.0631349	-3.15464	0.00160697	0.0402553	0.871053	108139
ENSMUSG00000020741	Cluh	74649495	74670847	52.68	protein_coding	clustered mitochondria (cluA/CLU1) homolog	702.217	-0.199424	0.0656378	-3.03826	0.00237952	0.0498715	0.870898	21352
ENSMUSG00000050697	Prkaa1	5143861	5181899	43.67	protein_coding	protein kinase, AMP-activated, alpha 1 catalytic subunit	431.925	-0.201972	0.0742935	-2.71857	0.00655644	0.0941447	0.869361	38038
ENSMUSG00000032356	Rasgrf1	89909908	90026977	45.8	protein_coding	RAS protein-specific guanine nucleotide-releasing factor 1	5646	-0.20354	0.0645659	-3.15244	0.00161913	0.0403418	0.868417	117069
ENSMUSG00000042616	Oscp1	126058565	126092195	47.29	protein_coding	organic solute carrier partner 1	429.474	-0.212835	0.0759605	-2.80191	0.00508009	0.0795365	0.86284	33630
ENSMUSG00000054309	Cpsf3	21286297	21315056	46.35	protein_coding	cleavage and polyadenylation specificity factor 3	436.25	-0.217479	0.0744051	-2.92291	0.00346781	0.0632716	0.860067	28759
ENSMUSG00000019841	Rev3l	39732118	39875211	38.26	protein_coding	REV3-like, catalytic subunit of DNA polymerase zeta RAD54 like (S. cerevisiae)	1130.88	-0.220577	0.0716518	-3.07845	0.00208079	0.0462127	0.858222	143093
ENSMUSG00000022672	Prkdc	15637866	15842235	39.91	protein_coding	protein kinase, DNA activated, catalytic polypeptide	543.886	-0.232972	0.0763415	-3.05171	0.00227544	0.0489712	0.85088	204369
ENSMUSG00000035202	Lars2	123366940	123462664	43.96	protein_coding	leucyl-tRNA synthetase, mitochondrial	34160.7	-0.240777	0.0838484	-2.87158	0.00408431	0.069334	0.846289	95724
ENSMUSG00000030323	Ift122	115853470	115926699	48.65	protein_coding	intraflagellar transport 122	404.909	-0.243072	0.0835116	-2.91064	0.00360688	0.0648725	0.844944	73229
ENSMUSG00000019809	Pex3	13523842	13553142	38.37	protein_coding	peroxisomal biogenesis factor 3	352.256	-0.243824	0.0901027	-2.70607	0.00680855	0.0964926	0.844504	29300
ENSMUSG00000028830	AU040320	126753544	126870070	45.52	protein_coding	expressed sequence AU040320	620.119	-0.24628	0.080485	-3.05994	0.00221379	0.0480911	0.843068	116526
ENSMUSG00000024654	Asrgl1	9109868	9135636	42.67	protein_coding	asparaginase like 1	1423.8	-0.24667	0.087585	-2.81635	0.00485724	0.0772319	0.842839	25768
ENSMUSG00000032410	Xrn1	95954760	96057803	39.82	protein_coding	5'-3' exoribonuclease 1	884.757	-0.247928	0.0796614	-3.11227	0.00185652	0.0438967	0.842105	103043
ENSMUSG00000062825	Actg1	120345690	120348542	55.28	protein_coding	actin, gamma, cytoplasmic 1	2553.91	-0.249493	0.0870044	-2.86759	0.00413614	0.0701278	0.841192	2852
ENSMUSG00000031760	Mt3	94152607	94154148	56.23	protein_coding	metallothionein 3	315.994	-0.250713	0.083903	-2.98813	0.00280691	0.0546928	0.840481	1541
ENSMUSG00000055013	Agap1	89454806	89897617	48.74	protein_coding	ArfGAP with GTPase domain, ankyrin repeat and PH domain 1	1782.21	-0.256311	0.0752554	-3.40588	0.000659511	0.0228658	0.837226	442811
ENSMUSG00000046567	4930430F08Rik	100572274	100589259	41.33	protein_coding	RIKEN cDNA 4930430F08 gene	270.353	-0.256464	0.0895377	-2.86432	0.00417909	0.0705977	0.837137	16985
ENSMUSG00000026163	Sphkap	83254139	83408200	39.74	protein_coding	SPHK1 interactor, AKAP domain containing	3045.62	-0.258724	0.0798978	-3.23818	0.00120295	0.0340623	0.835827	154061
ENSMUSG00000039637	Coro7	4626133	4679777	51.14	protein_coding	coronin 7	272.335	-0.259128	0.0914463	-2.83366	0.00460187	0.0743087	0.835593	53644
ENSMUSG00000037890	Wdr19	65199696	65260415	44.22	protein_coding	WD repeat domain 19	264.709	-0.260062	0.0886122	-2.93483	0.00333728	0.0617818	0.835052	60719
ENSMUSG00000000823	Znf512b	181582103	181592803	53.58	protein_coding	zinc finger protein 512B	539.237	-0.26095	0.0891775	-2.92619	0.00343145	0.0627729	0.834538	10700
ENSMUSG00000032127	Vps11	44348106	44361670	47.93	protein_coding	vacuolar protein sorting 11 (yeast)	515.669	-0.26304	0.0803039	-3.27555	0.00105455	0.031745	0.83333	13564
ENSMUSG00000043061	Tmem18	30584443	30591213	45.43	protein_coding	transmembrane protein 18	355.637	-0.263242	0.0868422	-3.03127	0.00243526	0.0503082	0.833213	6770
ENSMUSG00000034341	Wbp2	116078573	116086995	52.3	protein_coding	WW domain binding protein 2	1233.51	-0.265186	0.0686071	-3.86529	0.000110959	0.00607347	0.832091	8422
ENSMUSG00000070866	Zfp804a	82053222	82259879	35.09	protein_coding	zinc finger protein 804A	522.871	-0.266966	0.0924678	-2.88712	0.00388782	0.0671458	0.831066	206657
ENSMUSG00000052707	Tnrc6a	123123885	123195288	41.85	protein_coding	trinucleotide repeat containing 6a	847.452	-0.268607	0.0838561	-3.20319	0.00135912	0.0361298	0.830121	71403
ENSMUSG00000051351	Zfp46	136284683	136293942	49.59	protein_coding	zinc finger protein 46	417.481	-0.272336	0.097023	-2.80692	0.00500177	0.0786648	0.827978	9259
ENSMUSG00000102918	PCDHGB6	37806364	37841873	49.73	protein_coding	protocadherin gamma subfamily C, 3 precursor	489.843	-0.272943	0.0953629	-2.86215	0.0042078	0.0707221	0.82763	35509
ENSMUSG00000014850	Msh3	92211872	92355003	42.68	protein_coding	mutS homolog 3 (E. coli)	362.723	-0.275653	0.0898032	-3.06953	0.00214399	0.0470155	0.826076	143131
ENSMUSG00000033214	Slitrk5	111675115	111683134	50.75	protein_coding	SLIT and NTRK-like family, member 5	1176.41	-0.276629	0.0825107	-3.35264	0.000800448	0.0262833	0.825518	8019
ENSMUSG00000043183	Simc1	54503779	54551290	42.06	protein_coding	SUMO-interacting motifs containing 1	231.922	-0.279188	0.0917313	-3.04354	0.00233815	0.0495641	0.824055	47511
ENSMUSG00000014496	Ankrd28	31700015	31830415	37.81	protein_coding	ankyrin repeat domain 28	760.914	-0.280957	0.090431	-3.10687	0.00189081	0.0442132	0.823045	130400
ENSMUSG00000055932	Fto	91313532	91668439	45.26	protein_coding	fat mass and obesity associated	921.46	-0.284497	0.0929406	-3.06107	0.0022055	0.0479859	0.821028	354907
ENSMUSG00000042942	Greb1l	10325177	10562934	41.13	protein_coding	growth regulation by estrogen in breast cancer-like	154.028	-0.284937	0.0999128	-2.85186	0.00434649	0.0716127	0.820778	237757
ENSMUSG00000036353	P2ry12	59216271	59262831	39.6	protein_coding	purinergic receptor P2Y, G-protein coupled 12	515.614	-0.285282	0.0981468	-2.90669	0.00365276	0.0653577	0.820581	46560
ENSMUSG00000026109	Tmeff2	50900647	51187270	38.1	protein_coding	transmembrane protein with EGF-like and two follistatin-like domains 2	712.48	-0.286198	0.10291	-2.78107	0.00541803	0.0833262	0.82006	286623
ENSMUSG00000024899	Papss2	32620005	32667187	43.59	protein_coding	3'-phosphoadenosine 5'-phosphosulfate synthase 2	175.379	-0.288937	0.0983399	-2.93815	0.00330182	0.0612887	0.818505	47182
ENSMUSG00000033400	Agl	116739999	116808166	41.88	protein_coding	amylo-1,6-glucosidase, 4-alpha-glucanotransferase	480.559	-0.290916	0.0954686	-3.04725	0.00230949	0.0493963	0.817383	68167
ENSMUSG00000053693	Mast1	84911903	84937359	51.06	protein_coding	microtubule associated serine/threonine kinase 1	704.014	-0.293466	0.0911497	-3.21961	0.00128365	0.0350112	0.815939	25456
ENSMUSG00000024059	Clip4	71781947	71858351	43.47	protein_coding	CAP-GLY domain containing linker protein family, member 4	372.556	-0.294646	0.0814409	-3.61791	0.000296988	0.0129029	0.815272	76404
ENSMUSG00000018287	Spag7	70663771	70669416	50.48	protein_coding	sperm associated antigen 7	421.093	-0.295214	0.106356	-2.77573	0.00550778	0.0839635	0.814951	5645
ENSMUSG00000028960	Ube4b	149328416	149426749	47.25	protein_coding	ubiquitination factor E4B	966.007	-0.297216	0.0889506	-3.34136	0.000833692	0.0270182	0.813821	98333
ENSMUSG00000054920	Klhl5	65107568	65168188	42.81	protein_coding	kelch-like 5	386.297	-0.298239	0.0989006	-3.01554	0.00256524	0.0520349	0.813245	60620
ENSMUSG00000070047	Fat1	44935447	45052257	44.62	protein_coding	FAT tumor suppressor homolog 1 (Drosophila)	1358.29	-0.301136	0.0778415	-3.86858	0.000109471	0.00606364	0.811613	116810
ENSMUSG00000035566	Pcdh17	84443563	84537060	35.4	protein_coding	protocadherin 17	1641.41	-0.304257	0.10259	-2.96574	0.00301954	0.0579043	0.809859	93497
ENSMUSG00000001138	Cnnm3	36511867	36528237	52.74	protein_coding	cyclin M3	147.144	-0.304953	0.101176	-3.01408	0.00257758	0.0520874	0.809469	16370
ENSMUSG00000064363	mt-Nd4	10167	11544	35.63	protein_coding	mitochondrially encoded NADH dehydrogenase 4	48263.5	-0.305352	0.0956719	-3.19166	0.00141457	0.0370372	0.809244	1377
ENSMUSG00000001855	Nup214	31974436	32053975	45.88	protein_coding	nucleoporin 214	445.23	-0.305702	0.0983669	-3.10777	0.00188504	0.0442132	0.809049	79539
ENSMUSG00000042604	Kcna4	107290639	107298502	44.11	protein_coding	potassium voltage-gated channel, shaker-related subfamily, member 4	1027.18	-0.308789	0.105954	-2.91437	0.0035641	0.0644564	0.807319	7863
ENSMUSG00000028653	Trit1	123016597	123054949	44.62	protein_coding	tRNA isopentenyltransferase 1	147.671	-0.312156	0.10228	-3.05197	0.00227347	0.0489712	0.805437	38352
ENSMUSG00000031137	Fgf13	59062145	59568071	37.94	protein_coding	fibroblast growth factor 13	933.421	-0.313569	0.109996	-2.85074	0.00436173	0.0716127	0.804649	505926
ENSMUSG00000036620	Mgat4b	50210890	50235103	51.63	protein_coding	mannoside acetylglucosaminyltransferase 4, isoenzyme B	170.666	-0.314478	0.107363	-2.92912	0.00339921	0.0623844	0.804142	24213
ENSMUSG00000021318	Gli3	15463235	15730026	41.46	protein_coding	GLI-Kruppel family member GLI3	173.11	-0.317029	0.111188	-2.85129	0.00435419	0.0716127	0.802721	266791
ENSMUSG00000081049	Rps24-ps3	79195047	79195448	45.27	processed_pseudogene	ribosomal protein S24, pseudogene 3	409.706	-0.318485	0.117949	-2.70019	0.00692992	0.0973198	0.801911	401
ENSMUSG00000029413	Naaa	92257659	92278170	46.22	protein_coding	N-acylethanolamine acid amidase	211.533	-0.319146	0.105618	-3.02172	0.00251347	0.051541	0.801544	20511
ENSMUSG00000039126	Prune2	16956118	17223932	42.31	protein_coding	prune homolog 2 (Drosophila)	1104.33	-0.320854	0.118528	-2.70699	0.00678972	0.0964224	0.800596	267814
ENSMUSG00000026816	Gtf3c5	28566311	28583751	51.22	protein_coding	general transcription factor IIIC, polypeptide 5	132.552	-0.321022	0.118037	-2.71968	0.00653451	0.0941447	0.800503	17440
ENSMUSG00000053395	Cacng8	3390683	3415648	48.31	protein_coding	calcium channel, voltage-dependent, gamma subunit 8	121.454	-0.321269	0.11913	-2.69679	0.00700112	0.0980227	0.800366	24965
ENSMUSG00000025037	Maoa	16619698	16687818	36.55	protein_coding	monoamine oxidase A	315.63	-0.322784	0.110986	-2.90833	0.00363366	0.0651855	0.799526	68120
ENSMUSG00000040359	Ufl1	25248600	25281821	37.84	protein_coding	UFM1 specific ligase 1	456.141	-0.324996	0.0794104	-4.09262	4.26528e-05	0.00299616	0.7983	33221
ENSMUSG00000024683	Mrpl16	11770415	11774944	43.38	protein_coding	mitochondrial ribosomal protein L16	190.89	-0.326301	0.103275	-3.15954	0.00158017	0.0398713	0.797579	4529
ENSMUSG00000027167	Elp4	105701027	105904564	37.95	protein_coding	elongation protein 4 homolog (S. cerevisiae)	161.2	-0.327742	0.101596	-3.22593	0.00125565	0.0349845	0.796783	203537
ENSMUSG00000011306	Sugp1	70042813	70071953	47.02	protein_coding	SURP and G patch domain containing 1	365.401	-0.329408	0.115438	-2.85355	0.00432332	0.0716127	0.795863	29140
ENSMUSG00000031516	Dctn6	34090420	34108796	47.15	protein_coding	dynactin 6	348.027	-0.332284	0.116472	-2.85291	0.00433208	0.0716127	0.794278	18376
ENSMUSG00000035954	Dock4	40446053	40846486	40.82	protein_coding	dedicator of cytokinesis 4	2322.25	-0.332299	0.11103	-2.99289	0.00276351	0.0540779	0.79427	400433
ENSMUSG00000027550	Lrrcc1	14533788	14572658	37.96	protein_coding	leucine rich repeat and coiled-coil domain containing 1	444.214	-0.332544	0.0926639	-3.58871	0.000332312	0.0138836	0.794135	38870
ENSMUSG00000029098	Acox3	35583040	35613801	51.73	protein_coding	acyl-Coenzyme A oxidase 3, pristanoyl	217.183	-0.332723	0.102312	-3.25203	0.00114585	0.0332583	0.794037	30761
ENSMUSG00000061474	Mrps36	100735955	100744659	44.47	protein_coding	mitochondrial ribosomal protein S36	126.461	-0.332843	0.123282	-2.69985	0.00693706	0.0973219	0.79397	8704
ENSMUSG00000060961	Slc4a4	88886818	89239653	41.55	protein_coding	solute carrier family 4 (anion exchanger), member 4	1842.16	-0.33327	0.0896443	-3.71769	0.000201052	0.00963869	0.793735	352835
ENSMUSG00000024542	Cep192	67800107	67885168	40.81	protein_coding	centrosomal protein 192	104.456	-0.336465	0.123226	-2.73048	0.00632423	0.0927486	0.791979	85061
ENSMUSG00000040940	Arhgef1	24902912	24926592	53.6	protein_coding	Rho guanine nucleotide exchange factor (GEF) 1	77.9201	-0.337097	0.123557	-2.72827	0.00636682	0.0931767	0.791633	23680
ENSMUSG00000053646	Plxnb1	109095436	109119917	55.29	protein_coding	plexin B1	535.264	-0.338251	0.0933288	-3.6243	0.000289745	0.0127077	0.790999	24481
ENSMUSG00000020380	Rad50	53649519	53707319	42.68	protein_coding	RAD50 homolog (S. cerevisiae)	360.765	-0.339191	0.0989229	-3.42884	0.000606167	0.0216646	0.790485	57800
ENSMUSG00000034471	Caskin2	115799183	115813639	57.22	protein_coding	CASK-interacting protein 2	142.672	-0.340332	0.108891	-3.12543	0.00177544	0.0427251	0.78986	14456
ENSMUSG00000021180	Rps6ka5	100549778	100725028	39.68	protein_coding	ribosomal protein S6 kinase, polypeptide 5	310.908	-0.340649	0.102625	-3.31934	0.000902297	0.0286407	0.789686	175250
ENSMUSG00000026657	Frmd4a	4017717	4614043	44.38	protein_coding	FERM domain containing 4A	714.602	-0.342836	0.089581	-3.8271	0.00012966	0.00688039	0.78849	596326
ENSMUSG00000028292	Rars2	34614957	34660167	41.06	protein_coding	arginyl-tRNA synthetase 2, mitochondrial	233.345	-0.344639	0.0944178	-3.65015	0.000262082	0.0116454	0.787505	45210
ENSMUSG00000028007	Snx7	117781497	117868936	40.18	protein_coding	sorting nexin 7	220.374	-0.345055	0.111503	-3.09458	0.0019709	0.045068	0.787278	87439
ENSMUSG00000028433	Ubap2	41194313	41275144	43.06	protein_coding	ubiquitin-associated protein 2	279.918	-0.347338	0.121369	-2.86184	0.00421189	0.0707221	0.786033	80831
ENSMUSG00000032417	Rwdd2a	86571991	86574899	49.6	protein_coding	RWD domain containing 2A	164.307	-0.347448	0.112717	-3.08248	0.00205284	0.0458187	0.785973	2908
ENSMUSG00000025170	Rab40b	121356125	121388251	45.27	protein_coding	Rab40B, member RAS oncogene family	197.706	-0.349629	0.118799	-2.94302	0.00325024	0.0606552	0.784786	32126
ENSMUSG00000062861	Zfp28	6383318	6396633	46.08	protein_coding	zinc finger protein 28	97.9444	-0.351164	0.126318	-2.77999	0.00543602	0.0835104	0.783951	13315
ENSMUSG00000030757	Zkscan2	123479516	123500449	42.55	protein_coding	zinc finger with KRAB and SCAN domains 2	131.679	-0.351376	0.123096	-2.85449	0.00431061	0.0716127	0.783836	20933
ENSMUSG00000020538	Srebf1	60199089	60222581	54.22	protein_coding	sterol regulatory element binding transcription factor 1	301.13	-0.353777	0.0915196	-3.86558	0.000110824	0.00607347	0.782533	23492
ENSMUSG00000064337	mt-Rnr1	70	1024	35.81	Mt_rRNA	mitochondrially encoded 12S rRNA	195638	-0.35426	0.106148	-3.33741	0.000845634	0.0272149	0.782271	954
ENSMUSG00000023048	Prr13	102459028	102462806	49.51	protein_coding	proline rich 13	249.088	-0.356506	0.112313	-3.17423	0.00150234	0.0386797	0.781054	3778
ENSMUSG00000073792	Alg6	99715664	99763460	41.21	protein_coding	asparagine-linked glycosylation 6 (alpha-1,3,-glucosyltransferase)	100.368	-0.358348	0.11375	-3.15033	0.00163088	0.0404645	0.780057	47796
ENSMUSG00000039741	Bahcc1	120232947	120292296	56	protein_coding	BAH domain and coiled-coil containing 1	235.901	-0.359275	0.115305	-3.11586	0.00183408	0.0435885	0.779556	59349
ENSMUSG00000026687	Aldh9a1	167349991	167368532	45.92	protein_coding	aldehyde dehydrogenase 9, subfamily A1	95.6092	-0.35944	0.133045	-2.70165	0.00689968	0.0970914	0.779467	18541
ENSMUSG00000052125	F730043M19Rik	33111711	33147597	46.11	processed_transcript	RIKEN cDNA F730043M19 gene	301.909	-0.364198	0.134349	-2.71082	0.00671161	0.0956061	0.776901	35886
ENSMUSG00000006019	Dhx34	16197147	16222037	54	protein_coding	DEAH (Asp-Glu-Ala-His) box polypeptide 34	75.3077	-0.365032	0.131129	-2.78377	0.00537313	0.0829107	0.776452	24890
ENSMUSG00000046079	Lrrc8d	105699969	105832436	46.76	protein_coding	leucine rich repeat containing 8D	356.506	-0.365515	0.133342	-2.7412	0.00612161	0.090445	0.776192	132467
ENSMUSG00000036782	Klhl13	23219271	23365082	36.4	protein_coding	kelch-like 13	402.37	-0.366426	0.133754	-2.73956	0.00615213	0.0907032	0.775702	145811
ENSMUSG00000048355	Arxes1	136033367	136034946	45.38	protein_coding	adipocyte-related X-chromosome expressed sequence 1	96.5738	-0.367948	0.129029	-2.85167	0.004349	0.0716127	0.774884	1579
ENSMUSG00000055963	Triqk	12906838	12983553	37.55	protein_coding	triple QxxK/R motif containing	147.516	-0.36887	0.132861	-2.77636	0.00549718	0.0838939	0.774389	76715
ENSMUSG00000029049	Morn1	155086577	155145505	51.67	protein_coding	MORN repeat containing 1	70.9118	-0.36908	0.128517	-2.87184	0.00408095	0.069334	0.774276	58928
ENSMUSG00000030592	Ryr1	29003340	29125151	50.71	protein_coding	ryanodine receptor 1, skeletal muscle	108.145	-0.37191	0.132344	-2.81018	0.00495136	0.07796	0.772759	121811
ENSMUSG00000037787	Apopt1	111713261	111754980	48.73	protein_coding	apoptogenic, mitochondrial 1	136.191	-0.37232	0.113609	-3.27722	0.00104834	0.031745	0.772539	41719
ENSMUSG00000022864	D16Ertd472e	78544012	78576657	43.26	protein_coding	DNA segment, Chr 16, ERATO Doi 472, expressed	95.2438	-0.372753	0.126847	-2.93859	0.00329708	0.0612887	0.772307	32645
ENSMUSG00000020524	Gria1	57011387	57330244	44.69	protein_coding	glutamate receptor, ionotropic, AMPA1 (alpha 1)	4348.36	-0.373269	0.126067	-2.96088	0.00306759	0.0585835	0.772031	318857
ENSMUSG00000022685	Parn	13537964	13668170	43.21	protein_coding	poly(A)-specific ribonuclease (deadenylation nuclease)	200.082	-0.37455	0.119982	-3.12173	0.00179793	0.043021	0.771346	130206
ENSMUSG00000068748	Ptprz1	22875502	23052916	38.62	protein_coding	protein tyrosine phosphatase, receptor type Z, polypeptide 1	2814.69	-0.374931	0.12732	-2.94479	0.00323177	0.0604727	0.771142	177414
ENSMUSG00000022442	Ttll1	83483772	83510893	49.51	protein_coding	tubulin tyrosine ligase-like 1	209.173	-0.37607	0.131796	-2.85342	0.00432518	0.0716127	0.770534	27121
ENSMUSG00000036334	Igsf10	59316735	59344394	40.6	protein_coding	immunoglobulin superfamily, member 10	76.8285	-0.377407	0.128494	-2.93716	0.00331238	0.0614026	0.76982	27659
ENSMUSG00000031246	Sh3bgrl	109095365	109197873	37.5	protein_coding	SH3-binding domain glutamic acid-rich protein like	710.338	-0.378286	0.130807	-2.89193	0.00382883	0.0667471	0.769351	102508
ENSMUSG00000030307	Slc6a11	114131241	114249886	47.39	protein_coding	solute carrier family 6 (neurotransmitter transporter, GABA), member 11	685.232	-0.381184	0.104219	-3.65753	0.000254655	0.0115702	0.767807	118645
ENSMUSG00000028864	Hgf	16553550	16619439	35.36	protein_coding	hepatocyte growth factor	150.962	-0.381589	0.131994	-2.89096	0.00384073	0.0667471	0.767591	65889
ENSMUSG00000044475	Ascc1	60002805	60099990	46.37	protein_coding	activating signal cointegrator 1 complex subunit 1	99.9858	-0.381637	0.122067	-3.12645	0.00176931	0.0427061	0.767566	97185
ENSMUSG00000015305	Sash1	8722219	8886070	45.66	protein_coding	SAM and SH3 domain containing 1	894.575	-0.381716	0.121204	-3.14936	0.00163626	0.0404786	0.767524	163851
ENSMUSG00000043635	Adamts3	89673841	89883334	40.39	protein_coding	a disintegrin-like and metallopeptidase (reprolysin type) with thrombospondin type 1 motif, 3	250.662	-0.3823	0.107016	-3.57238	0.000353749	0.0144652	0.767213	209493
ENSMUSG00000041000	Trim62	128883580	128911328	52.94	protein_coding	tripartite motif-containing 62	97.7234	-0.384907	0.132706	-2.90045	0.00372632	0.065949	0.765828	27748
ENSMUSG00000048240	Gng7	80948624	81014945	51.33	protein_coding	guanine nucleotide binding protein (G protein), gamma 7	410.181	-0.385817	0.124363	-3.10234	0.00192	0.0445467	0.765345	66321
ENSMUSG00000034532	Fbxo16	65266701	65321501	44.69	protein_coding	F-box protein 16	69.0452	-0.386358	0.132593	-2.91387	0.00356984	0.0644564	0.765059	54800
ENSMUSG00000071226	Cecr2	120666369	120771190	41.41	protein_coding	cat eye syndrome chromosome region, candidate 2	91.5083	-0.386375	0.128139	-3.01527	0.0025675	0.0520349	0.765049	104821
ENSMUSG00000056459	Zbtb25	76347782	76369602	43.08	protein_coding	zinc finger and BTB domain containing 25	79.1405	-0.388756	0.136539	-2.84721	0.00441039	0.0719556	0.763788	21820
ENSMUSG00000066829	Zfp810	22276748	22307638	42.66	protein_coding	zinc finger protein 810	223.62	-0.389399	0.12336	-3.1566	0.00159619	0.0400575	0.763447	30890
ENSMUSG00000041617	Ccdc74a	17646470	17650738	56.83	protein_coding	coiled-coil domain containing 74A	175.606	-0.390786	0.1231	-3.17453	0.00150077	0.0386797	0.762714	4268
ENSMUSG00000054939	Zfp174	3847268	3858880	45.45	protein_coding	zinc finger protein 174	106.058	-0.391156	0.124288	-3.14718	0.00164856	0.0406382	0.762518	11612
ENSMUSG00000057572	Zbtb8os	129335695	129354547	45.05	protein_coding	zinc finger and BTB domain containing 8 opposite strand	71.437	-0.394745	0.131821	-2.99456	0.00274844	0.0540779	0.760624	18852
ENSMUSG00000037573	Tob1	94211454	94215495	47.7	protein_coding	transducer of ErbB-2.1	261.672	-0.395322	0.11021	-3.58698	0.000334531	0.0138836	0.76032	4041
ENSMUSG00000026017	Carf	60098247	60153953	39.03	protein_coding	calcium response factor	321.889	-0.395934	0.0924878	-4.28094	1.8611e-05	0.00165735	0.759997	55706
ENSMUSG00000021003	Galc	98202304	98259459	41.97	protein_coding	galactosylceramidase	186.696	-0.396363	0.134579	-2.9452	0.00322742	0.0604727	0.759771	57155
ENSMUSG00000043496	Tril	53815466	53820830	55.43	protein_coding	TLR4 interactor with leucine-rich repeats	387.137	-0.398373	0.0921318	-4.32395	1.5326e-05	0.00142025	0.758713	5364
ENSMUSG00000062151	Unc13c	73479422	73968966	40.41	protein_coding	unc-13 homolog C (C. elegans)	1068.84	-0.398638	0.137353	-2.90229	0.0037044	0.0658597	0.758574	489544
ENSMUSG00000041608	Entpd3	120539818	120568318	48.01	protein_coding	ectonucleoside triphosphate diphosphohydrolase 3	56.0654	-0.399305	0.143409	-2.78438	0.00536299	0.0828463	0.758223	28500
ENSMUSG00000008129	4930432K21Rik	84148025	84172590	47.28	protein_coding	RIKEN cDNA 4930432K21 gene	40.4551	-0.39982	0.147077	-2.71845	0.0065589	0.0941447	0.757953	24565
ENSMUSG00000041329	Atp1b2	69599736	69605942	53.41	protein_coding	ATPase, Na+/K+ transporting, beta 2 polypeptide	1527.44	-0.401915	0.130126	-3.08866	0.00201062	0.0452326	0.756853	6206
ENSMUSG00000052676	Zmat1	134971372	135009209	36.81	protein_coding	zinc finger, matrin type 1	221.802	-0.403405	0.121813	-3.31167	0.000927422	0.0291053	0.756072	37837
ENSMUSG00000010505	Myt1	181763332	181827797	43.92	protein_coding	myelin transcription factor 1	151.294	-0.404511	0.147053	-2.75078	0.00594534	0.0885939	0.755492	64465
ENSMUSG00000050721	Plekho2	65554386	65580040	49.65	protein_coding	pleckstrin homology domain containing, family O member 2	82.5437	-0.404758	0.131311	-3.08243	0.00205316	0.0458187	0.755363	25654
ENSMUSG00000056854	Pou3f4	110814280	110817207	51.84	protein_coding	POU domain, class 3, transcription factor 4	62.1529	-0.405848	0.150348	-2.69938	0.00694689	0.0973616	0.754793	2927
ENSMUSG00000037846	Rtkn2	67979570	68059740	44.44	protein_coding	rhotekin 2	59.367	-0.405865	0.137268	-2.95672	0.00310927	0.0590549	0.754784	80170
ENSMUSG00000015243	Abca1	53030787	53159895	44.25	protein_coding	ATP-binding cassette, sub-family A (ABC1), member 1	602.794	-0.405944	0.103254	-3.93151	8.44157e-05	0.00497301	0.754742	129108
ENSMUSG00000032558	Nphp3	104002544	104153483	43.95	protein_coding	nephronophthisis 3 (adolescent)	97.9202	-0.406243	0.136273	-2.98109	0.00287226	0.0555708	0.754586	150939
ENSMUSG00000051817	Sox12	152393611	152398063	59.94	protein_coding	SRY (sex determining region Y)-box 12	70.1253	-0.406974	0.135226	-3.00958	0.00261608	0.0524913	0.754204	4452
ENSMUSG00000048905	4930539E08Rik	28896397	28915324	50.23	protein_coding	RIKEN cDNA 4930539E08 gene	99.6488	-0.406984	0.146136	-2.78497	0.0053532	0.0827871	0.754199	18927
ENSMUSG00000038156	Spon1	113765998	114043370	44.26	protein_coding	spondin 1, (f-spondin) extracellular matrix protein	953.437	-0.40713	0.140008	-2.9079	0.00363869	0.0651916	0.754122	277372
ENSMUSG00000048581	E130311K13Rik	63914684	63929472	40.72	protein_coding	RIKEN cDNA E130311K13 gene	122.214	-0.407753	0.146313	-2.78685	0.00532229	0.0825634	0.753797	14788
ENSMUSG00000030316	Tamm41	115004381	115037876	48.2	protein_coding	TAM41, mitochondrial translocator assembly and maintenance protein, homolog (S. cerevisiae)	48.8551	-0.411182	0.144264	-2.85021	0.00436899	0.0716298	0.752007	33495
ENSMUSG00000026556	Vangl2	172000960	172028444	51.43	protein_coding	vang-like 2 (van gogh, Drosophila)	114.834	-0.411596	0.128776	-3.19622	0.00139242	0.0366749	0.751791	27484
ENSMUSG00000025579	Gaa	119267887	119285454	55.42	protein_coding	glucosidase, alpha, acid	1637.07	-0.411981	0.116551	-3.53478	0.000408108	0.0162112	0.75159	17567
ENSMUSG00000031224	Magee2	104854952	104857267	47.8	protein_coding	melanoma antigen, family E, 2	100.764	-0.412624	0.146629	-2.81407	0.00489181	0.0774042	0.751256	2315
ENSMUSG00000096014	Sox1	12395295	12400126	56.89	protein_coding	SRY (sex determining region Y)-box 1	133.934	-0.412918	0.101653	-4.06204	4.8645e-05	0.00328781	0.751103	4831
ENSMUSG00000041378	Cldn5	18776847	18778260	60.54	protein_coding	claudin 5	204.04	-0.413637	0.103911	-3.98069	6.87156e-05	0.00428409	0.750728	1413
ENSMUSG00000063253	Scoc	83434493	83458391	41.73	protein_coding	short coiled-coil protein	463.144	-0.413641	0.0945893	-4.37302	1.2254e-05	0.00123743	0.750726	23898
ENSMUSG00000059588	Calcrl	84330626	84425411	36.88	protein_coding	calcitonin receptor-like	106.441	-0.413659	0.131509	-3.14549	0.00165808	0.0408005	0.750717	94785
ENSMUSG00000104346	PCDHGB6	37674307	37841873	45.21	protein_coding	protocadherin gamma-A3 precursor	113.034	-0.413803	0.134647	-3.07324	0.00211746	0.0466547	0.750642	167566
ENSMUSG00000050875	A730017C20Rik	59062248	59076962	39.46	protein_coding	RIKEN cDNA A730017C20 gene	185.681	-0.414124	0.102345	-4.04634	5.20256e-05	0.00343163	0.750475	14714
ENSMUSG00000020154	Ptprb	116301374	116389538	43.48	protein_coding	protein tyrosine phosphatase, receptor type, B	510.587	-0.414347	0.135866	-3.04966	0.00229098	0.0490778	0.750359	88164
ENSMUSG00000025885	Myo5b	74440936	74771493	46.3	protein_coding	myosin VB	754.344	-0.41632	0.152519	-2.72963	0.00634049	0.0928892	0.749334	330557
ENSMUSG00000021418	Rpp40	35893472	35906359	43.41	protein_coding	ribonuclease P 40 subunit	63.9952	-0.417214	0.131677	-3.16847	0.00153245	0.0391648	0.748869	12887
ENSMUSG00000053414	Hunk	90386397	90499553	47.46	protein_coding	hormonally upregulated Neu-associated kinase	201.884	-0.419467	0.12646	-3.31699	0.00090992	0.0287514	0.747701	113156
ENSMUSG00000046743	Fat4	38886940	39011985	41.27	protein_coding	FAT tumor suppressor homolog 4 (Drosophila)	1054.02	-0.42076	0.12931	-3.25389	0.00113834	0.0332578	0.747031	125045
ENSMUSG00000074637	Sox2	34650005	34652461	52.06	protein_coding	SRY (sex determining region Y)-box 2	510.316	-0.421564	0.0990459	-4.25625	2.07883e-05	0.00176528	0.746615	2456
ENSMUSG00000059013	Sh2d3c	32721055	32755512	51.65	protein_coding	SH2 domain containing 3C	109.552	-0.423484	0.115921	-3.65322	0.000258975	0.0116454	0.745622	34457
ENSMUSG00000031665	Sall1	89027248	89044162	48.87	protein_coding	sal-like 1 (Drosophila)	121.277	-0.423823	0.133881	-3.16567	0.00154725	0.0393983	0.745447	16914
ENSMUSG00000025321	Itgb8	119158022	119238802	37.52	protein_coding	integrin beta 8	1140.86	-0.425669	0.0679815	-6.26154	3.81196e-10	2.30425e-07	0.744494	80780
ENSMUSG00000045817	Zfp36l2	84183931	84187947	56.16	protein_coding	zinc finger protein 36, C3H type-like 2	150.737	-0.426822	0.153881	-2.77372	0.00554186	0.0840477	0.743899	4016
ENSMUSG00000028517	Ppap2b	105157347	105232764	46.41	protein_coding	phosphatidic acid phosphatase type 2B	1453.35	-0.427068	0.107986	-3.95484	7.65849e-05	0.0046496	0.743772	75417
ENSMUSG00000068391	Chrac1	73090392	73097554	46.88	protein_coding	chromatin accessibility complex 1	111.153	-0.42843	0.123272	-3.47548	0.000509949	0.0194242	0.74307	7162
ENSMUSG00000028099	Polr3c	96711490	96727628	45.51	protein_coding	polymerase (RNA) III (DNA directed) polypeptide C	119.359	-0.430017	0.131906	-3.26002	0.00111403	0.032954	0.742253	16138
ENSMUSG00000020423	Btg2	134075170	134079120	50.29	protein_coding	B cell translocation gene 2, anti-proliferative	165.991	-0.433882	0.113582	-3.82	0.00013345	0.00700137	0.740267	3950
ENSMUSG00000052713	Zfp608	54888045	54990180	43.13	protein_coding	zinc finger protein 608	418.92	-0.434269	0.137941	-3.14822	0.00164268	0.0405652	0.740069	102135
ENSMUSG00000022272	Myo10	25622525	25813673	46.9	protein_coding	myosin X	542.676	-0.436623	0.149935	-2.91208	0.00359036	0.0646867	0.738862	191148
ENSMUSG00000049038	Mterf2	85119435	85128027	41.95	protein_coding	mitochondrial transcription termination factor 2	88.8989	-0.437971	0.141876	-3.08701	0.00202184	0.0453381	0.738172	8592
ENSMUSG00000039934	Gsap	21186267	21291701	43.52	protein_coding	gamma-secretase activating protein	64.2576	-0.440919	0.133889	-3.29316	0.000990683	0.0304723	0.736665	105434
ENSMUSG00000030259	Rassf8	145746748	145821079	45.76	protein_coding	Ras association (RalGDS/AF-6) domain family (N-terminal) member 8	228.411	-0.440979	0.100999	-4.36615	1.26454e-05	0.00125578	0.736635	74331
ENSMUSG00000042476	Abcb4	8893721	8959225	40.96	protein_coding	ATP-binding cassette, sub-family B (MDR/TAP), member 4	75.3284	-0.4411	0.143523	-3.07338	0.0021165	0.0466547	0.736573	65504
ENSMUSG00000021646	Mccc2	99948533	100015639	44.16	protein_coding	methylcrotonoyl-Coenzyme A carboxylase 2 (beta)	226.33	-0.44197	0.123098	-3.5904	0.000330173	0.0138763	0.736129	67106
ENSMUSG00000062470	Fbxl12os	20607481	20617271	40.69	antisense	F-box and leucine-rich repeat protein 12, opposite strand	45.9355	-0.442925	0.14964	-2.95993	0.00307709	0.0586038	0.735642	9790
ENSMUSG00000040624	Plekhg1	3740364	3967303	42.64	protein_coding	pleckstrin homology domain containing, family G (with RhoGef domain) member 1	203.098	-0.443865	0.147001	-3.01948	0.00253209	0.05177	0.735162	226939
ENSMUSG00000058135	Gstm1	108012255	108017973	51.3	protein_coding	glutathione S-transferase, mu 1	732.993	-0.444411	0.12372	-3.59208	0.000328045	0.0138626	0.734884	5718
ENSMUSG00000044566	Cage1	38006052	38037069	42.22	protein_coding	cancer antigen 1	85.1736	-0.445224	0.118244	-3.76528	0.000166361	0.00838014	0.73447	31017
ENSMUSG00000038967	Pdk2	95026258	95041354	52.98	protein_coding	pyruvate dehydrogenase kinase, isoenzyme 2	284.68	-0.445367	0.12357	-3.60415	0.000313172	0.0133559	0.734397	15096
ENSMUSG00000022671	Mzt2	15848441	15863369	44.72	protein_coding	mitotic spindle organizing protein 2	92.5453	-0.445391	0.133671	-3.332	0.000862232	0.0276212	0.734385	14928
ENSMUSG00000025521	Tmem192	64947185	64969034	45.23	protein_coding	transmembrane protein 192	38.9489	-0.446947	0.158573	-2.81855	0.00482413	0.0770034	0.733594	21849
ENSMUSG00000024292	Cyp4f14	32905071	32917342	47.18	protein_coding	cytochrome P450, family 4, subfamily f, polypeptide 14	26.9041	-0.449096	0.166257	-2.70122	0.00690861	0.0971187	0.732502	12271
ENSMUSG00000029003	Mad2l2	148130384	148145699	50.36	protein_coding	MAD2 mitotic arrest deficient-like 2	54.5792	-0.449659	0.142603	-3.15322	0.00161482	0.0403418	0.732216	15315
ENSMUSG00000050505	Pcdh20	88464743	88471396	42.85	protein_coding	protocadherin 20	667.918	-0.450005	0.144381	-3.11679	0.00182834	0.0435263	0.73204	6653
ENSMUSG00000073423	Zfp414	33629090	33631779	55.17	protein_coding	zinc finger protein 414	49.2105	-0.450127	0.148109	-3.03916	0.00237236	0.0498715	0.731979	2689
ENSMUSG00000024617	Camk2a	60925618	60988152	50.93	protein_coding	calcium/calmodulin-dependent protein kinase II alpha	14029.9	-0.450689	0.121331	-3.71454	0.000203574	0.00972607	0.731693	62534
ENSMUSG00000025993	Slc40a1	45908068	45926523	40.07	protein_coding	solute carrier family 40 (iron-regulated transporter), member 1	37.7044	-0.452141	0.165971	-2.72421	0.0064455	0.0935507	0.730957	18455
ENSMUSG00000039835	Nhsl1	18390322	18533892	43.73	protein_coding	NHS-like 1	339.958	-0.455017	0.164816	-2.76075	0.00576682	0.0867707	0.729501	143570
ENSMUSG00000039410	Prdm16	154316125	154636873	51.48	protein_coding	PR domain containing 16	74.6023	-0.456613	0.147415	-3.09746	0.00195184	0.0447796	0.728695	320748
ENSMUSG00000026923	Notch1	26457903	26516663	53.72	protein_coding	notch 1	243.248	-0.457357	0.137453	-3.32737	0.000876712	0.0280205	0.728319	58760
ENSMUSG00000097649	Gm10561	55226251	55235622	42.86	antisense	predicted gene 10561	60.765	-0.458067	0.145103	-3.15684	0.0015949	0.0400575	0.727961	9371
ENSMUSG00000020359	Phykpl	51584757	51604489	47.34	protein_coding	5-phosphohydroxy-L-lysine phospholyase	52.9784	-0.458603	0.14248	-3.21873	0.0012876	0.0350112	0.72769	19732
ENSMUSG00000031618	Nr3c2	76899442	77245012	41.62	protein_coding	nuclear receptor subfamily 3, group C, member 2	773.446	-0.458838	0.146863	-3.12426	0.00178252	0.042802	0.727572	345570
ENSMUSG00000036885	Arhgef26	62338344	62462221	41.76	protein_coding	Rho guanine nucleotide exchange factor (GEF) 26	276.371	-0.463172	0.140357	-3.29997	0.000966961	0.0300082	0.725389	123877
ENSMUSG00000028927	Padi2	140906344	140952586	51.66	protein_coding	peptidyl arginine deiminase, type II	265.309	-0.464781	0.130001	-3.57522	0.000349929	0.01443	0.724581	46242
ENSMUSG00000027684	Mecom	29951296	30548008	41.5	protein_coding	MDS1 and EVI1 complex locus	39.4489	-0.464832	0.171	-2.71831	0.00656162	0.0941447	0.724555	596712
ENSMUSG00000022091	Sorbs3	70180468	70207637	51.61	protein_coding	sorbin and SH3 domain containing 3	73.0435	-0.465907	0.157619	-2.9559	0.00311754	0.0590649	0.724016	27169
ENSMUSG00000064346	mt-Tw	4950	5016	40.3	Mt_tRNA	mitochondrially encoded tRNA tryptophan	178.136	-0.467777	0.137776	-3.39521	0.00068577	0.0235414	0.723078	66
ENSMUSG00000038351	Sgsm2	74849261	74897060	49.77	protein_coding	small G protein signaling modulator 2	592.402	-0.468718	0.096598	-4.85225	1.22071e-06	0.00020126	0.722607	47799
ENSMUSG00000039179	Tekt5	10357948	10395490	48.87	protein_coding	tektin 5	64.8638	-0.469135	0.153379	-3.05866	0.00222326	0.0481777	0.722398	37542
ENSMUSG00000000957	Mmp14	54431604	54441258	53.74	protein_coding	matrix metallopeptidase 14 (membrane-inserted)	107.394	-0.469393	0.144645	-3.24513	0.00117395	0.0338441	0.722268	9654
ENSMUSG00000041147	Brca2	150522630	150569746	41.72	protein_coding	breast cancer 2	103.914	-0.469893	0.135674	-3.46341	0.000533379	0.0197633	0.722018	47116
ENSMUSG00000104026	RP24-546N2.5	160570161	160573810	35.23	TEC		17.8693	-0.472185	0.174656	-2.70352	0.00686101	0.0968412	0.720872	3649
ENSMUSG00000033855	Ston1	88597684	88662586	45.01	protein_coding	stonin 1	25.4621	-0.475943	0.174617	-2.72565	0.00641755	0.0935507	0.718997	64902
ENSMUSG00000097745	AI115009	152666913	152681432	45.59	lincRNA	expressed sequence AI115009	19.8847	-0.477574	0.176009	-2.71336	0.00666052	0.0950184	0.718184	14519
ENSMUSG00000026994	Galnt3	66082766	66124994	41.53	protein_coding	UDP-N-acetyl-alpha-D-galactosamine:polypeptide N-acetylgalactosaminyltransferase 3	26.7114	-0.478403	0.169721	-2.81876	0.004821	0.0770034	0.717772	42228
ENSMUSG00000025076	Casp7	56397129	56442344	47.56	protein_coding	caspase 7	26.6998	-0.479883	0.166604	-2.88037	0.00397203	0.0680926	0.717036	45215
ENSMUSG00000034858	Fam214a	74953053	75032468	43.41	protein_coding	family with sequence similarity 214, member A	340.118	-0.480558	0.114203	-4.20793	2.57716e-05	0.00209534	0.7167	79415
ENSMUSG00000042010	Acacb	114146535	114250761	50.07	protein_coding	acetyl-Coenzyme A carboxylase beta	33.2322	-0.481716	0.168946	-2.85129	0.00435416	0.0716127	0.716125	104226
ENSMUSG00000031853	BC021891	125910450	125947439	48.03	protein_coding	cDNA sequence BC021891	34.2761	-0.483437	0.163418	-2.95828	0.00309366	0.0588388	0.715272	36989
ENSMUSG00000067872	Ccdc87	4839366	4842528	50.93	protein_coding	coiled-coil domain containing 87	16.4064	-0.484102	0.17987	-2.6914	0.00711532	0.099222	0.714942	3162
ENSMUSG00000033209	Ttc28	110879803	111289780	46.78	protein_coding	tetratricopeptide repeat domain 28	190.443	-0.4859	0.117375	-4.13972	3.4773e-05	0.00257154	0.714052	409977
ENSMUSG00000087968	Gm25395	87776938	87777209	48.53	snoRNA	predicted gene, 25395	217.815	-0.486092	0.178634	-2.72117	0.00650521	0.0939168	0.713956	271
ENSMUSG00000018740	Slc25a35	68968131	68974365	52.32	protein_coding	solute carrier family 25, member 35	33.9423	-0.487549	0.157634	-3.09293	0.00198191	0.0451713	0.713236	6234
ENSMUSG00000044827	Tlr1	64924811	64932761	43.55	protein_coding	toll-like receptor 1	26.3379	-0.487837	0.168722	-2.89136	0.00383584	0.0667471	0.713094	7950
ENSMUSG00000074922	Fam122a	24476502	24477356	59.42	protein_coding	family with sequence similarity 122, member A	49.7711	-0.488384	0.151709	-3.21922	0.0012854	0.0350112	0.712823	854
ENSMUSG00000055639	Dach1	97786853	98169765	35.24	protein_coding	dachshund 1 (Drosophila)	61.9048	-0.488709	0.169033	-2.89121	0.00383759	0.0667471	0.712662	382912
ENSMUSG00000041703	Zic5	122456795	122465677	48.53	protein_coding	zinc finger protein of the cerebellum 5	45.0875	-0.488739	0.17266	-2.83065	0.00464535	0.0746639	0.712648	8882
ENSMUSG00000058488	Kl	150952607	150993809	44.38	protein_coding	klotho	103.511	-0.490888	0.176631	-2.77918	0.00544966	0.0835864	0.711587	41202
ENSMUSG00000040280	Ndufa4l2	127514939	127517152	56.64	protein_coding	NADH dehydrogenase (ubiquinone) 1 alpha subcomplex, 4-like 2	19.5106	-0.491442	0.17434	-2.81886	0.00481938	0.0770034	0.711314	2213
ENSMUSG00000024036	Slc37a1	31295483	31350696	50.28	protein_coding	solute carrier family 37 (glycerol-3-phosphate transporter), member 1	36.0725	-0.494391	0.158759	-3.11411	0.00184503	0.0436993	0.709861	55213
ENSMUSG00000024026	Glo1	30592866	30612659	46.65	protein_coding	glyoxalase 1	788.424	-0.494846	0.121784	-4.06331	4.83808e-05	0.00328781	0.709638	19793
ENSMUSG00000064339	mt-Rnr2	1094	2675	35.4	Mt_rRNA	mitochondrially encoded 16S rRNA	780382	-0.495792	0.164559	-3.01285	0.00258804	0.0522228	0.709172	1581
ENSMUSG00000040272	Accs	93833467	93849943	49.63	protein_coding	1-aminocyclopropane-1-carboxylate synthase (non-functional)	22.2914	-0.497443	0.174732	-2.8469	0.00441474	0.0719556	0.708361	16476
ENSMUSG00000021943	Gdf10	33923587	33935280	50.17	protein_coding	growth differentiation factor 10	31.2607	-0.497556	0.172802	-2.87933	0.00398517	0.0682338	0.708306	11693
ENSMUSG00000026354	Lct	128284756	128328318	48.32	protein_coding	lactase	27.3455	-0.497961	0.143831	-3.46213	0.00053591	0.0197633	0.708107	43562
ENSMUSG00000032744	Heyl	123233556	123249875	51.44	protein_coding	hairy/enhancer-of-split related with YRPW motif-like	18.4211	-0.499005	0.175107	-2.84972	0.00437582	0.0716573	0.707595	16319
ENSMUSG00000025815	Dhtkd1	5896115	5942792	44.95	protein_coding	dehydrogenase E1 and transketolase domain containing 1	53.4125	-0.502096	0.14981	-3.35156	0.000803578	0.0262833	0.70608	46677
ENSMUSG00000041440	Gk5	96119362	96184608	44.29	protein_coding	glycerol kinase 5 (putative)	54.9743	-0.502537	0.146905	-3.42084	0.000624285	0.0221414	0.705865	65246
ENSMUSG00000085389	1700003M07Rik	129960374	129963657	50.49	lincRNA	RIKEN cDNA 1700003M07 gene	22.6997	-0.502943	0.171171	-2.93824	0.0033008	0.0612887	0.705666	3283
ENSMUSG00000078202	Nrarp	25180758	25183339	54.53	protein_coding	Notch-regulated ankyrin repeat protein	114.857	-0.502995	0.134809	-3.73117	0.000190596	0.00932254	0.70564	2581
ENSMUSG00000036169	Sostdc1	36314169	36318452	40.99	protein_coding	sclerostin domain containing 1	15.5788	-0.503161	0.178645	-2.81654	0.00485436	0.0772319	0.705559	4283
ENSMUSG00000037355	Uvssa	33378549	33419754	47.39	protein_coding	UV stimulated scaffold protein A	149.284	-0.503488	0.097685	-5.1542	2.54719e-07	5.44824e-05	0.705399	41205
ENSMUSG00000025938	Slco5a1	12866549	12992650	42	protein_coding	solute carrier organic anion transporter family, member 5A1	31.4864	-0.507059	0.165074	-3.07171	0.00212839	0.0467472	0.703655	126101
ENSMUSG00000038225	Primpol	46575579	46617212	41.18	protein_coding	primase and polymerase (DNA-directed)	42.7991	-0.507346	0.152877	-3.31866	0.0009045	0.0286453	0.703516	41633
ENSMUSG00000067081	Asb18	89950220	90014666	47.42	protein_coding	ankyrin repeat and SOCS box-containing 18	22.9964	-0.507777	0.169351	-2.99837	0.00271427	0.0536566	0.703305	64446
ENSMUSG00000043943	Naalad2	18321951	18402995	37.61	protein_coding	N-acetylated alpha-linked acidic dipeptidase 2	19.0562	-0.507901	0.179077	-2.83622	0.00456511	0.0738163	0.703245	81044
ENSMUSG00000019027	Dnah1	31260375	31323896	51.82	protein_coding	dynein, axonemal, heavy chain 1	83.5072	-0.509345	0.135387	-3.76213	0.000168471	0.00844644	0.702541	63521
ENSMUSG00000015879	Fam184b	45529706	45639501	42.46	protein_coding	family with sequence similarity 184, member B	118.531	-0.511147	0.141266	-3.61834	0.000296501	0.0129029	0.701665	109795
ENSMUSG00000030226	Lmo3	138362918	138581968	38.47	protein_coding	LIM domain only 3	1184	-0.511178	0.151883	-3.3656	0.000763774	0.0253431	0.701649	219050
ENSMUSG00000039552	Rsph4a	33905111	33916021	38.2	protein_coding	radial spoke head 4 homolog A (Chlamydomonas)	67.9583	-0.511366	0.169818	-3.01127	0.0026016	0.0524203	0.701558	10910
ENSMUSG00000010175	Prox1	190118035	190170714	45.14	protein_coding	prospero homeobox 1	224.379	-0.512018	0.154045	-3.32383	0.000887902	0.0283131	0.701241	52679
ENSMUSG00000068551	Zfp467	48427697	48445825	51.66	protein_coding	zinc finger protein 467	136.996	-0.512048	0.122897	-4.16648	3.09339e-05	0.00236304	0.701227	18128
ENSMUSG00000031303	Map3k15	159988433	160123351	39.81	protein_coding	mitogen-activated protein kinase kinase kinase 15	22.6418	-0.512064	0.177353	-2.88726	0.00388613	0.0671458	0.701218	134918
ENSMUSG00000064370	mt-Cytb	14145	15288	39.07	protein_coding	mitochondrially encoded cytochrome b	55331	-0.512272	0.117157	-4.37251	1.22826e-05	0.00123743	0.701117	1143
ENSMUSG00000052415	Tchh	93442330	93449077	52.53	protein_coding	trichohyalin	56.7346	-0.512413	0.175362	-2.92202	0.00347765	0.0632851	0.701049	6747
ENSMUSG00000029206	Nsun7	66259912	66298016	42.68	protein_coding	NOL1/NOP2/Sun domain family, member 7	36.8447	-0.513848	0.166968	-3.07752	0.00208733	0.0462841	0.700352	38104
ENSMUSG00000037143	Cfap61	145934784	146215039	43.95	protein_coding	cilia and flagella associated protein 61	58.0704	-0.514361	0.14513	-3.54413	0.000393904	0.0158737	0.700103	280255
ENSMUSG00000021257	Angel1	86700502	86726460	46.66	protein_coding	angel homolog 1 (Drosophila)	31.9454	-0.514403	0.159498	-3.22513	0.00125914	0.0350112	0.700083	25958
ENSMUSG00000092448	Gm20387	110639753	110645916	42.57	processed_transcript	predicted gene 20387	23.9866	-0.514688	0.179954	-2.8601	0.00423503	0.0708539	0.699944	6163
ENSMUSG00000031925	Maml2	13619990	13709533	43.18	protein_coding	mastermind like 2 (Drosophila)	116.546	-0.51469	0.116872	-4.40387	1.06336e-05	0.00111157	0.699943	89543
ENSMUSG00000053684	BC048403	121739937	121752878	46.72	protein_coding	cDNA sequence BC048403	59.4626	-0.515187	0.145045	-3.55192	0.000382435	0.0154564	0.699702	12941
ENSMUSG00000066113	Adamtsl1	86053915	86428385	40.92	protein_coding	ADAMTS-like 1	61.9234	-0.516263	0.176263	-2.92894	0.00340124	0.0623844	0.699181	374470
ENSMUSG00000021541	Trpc7	56773113	56895789	47.58	protein_coding	transient receptor potential cation channel, subfamily C, member 7	41.7747	-0.517877	0.179424	-2.88633	0.00389759	0.0672311	0.698399	122676
ENSMUSG00000041482	Piezo2	63010213	63387183	42.52	protein_coding	piezo-type mechanosensitive ion channel component 2	18.4571	-0.518412	0.179864	-2.88225	0.00394847	0.0678561	0.69814	376970
ENSMUSG00000087535	Zmiz1os1	25455737	25461128	59.66	processed_transcript	Zmiz1 opposite strand 1	22.4751	-0.519683	0.169552	-3.06503	0.00217646	0.0474285	0.697525	5391
ENSMUSG00000022150	Dab2	6299788	6440712	41.15	protein_coding	disabled 2, mitogen-responsive phosphoprotein	110.293	-0.519762	0.17319	-3.00111	0.00268994	0.0535026	0.697487	140924
ENSMUSG00000071658	Gng3	8836929	8839246	51.98	protein_coding	guanine nucleotide binding protein (G protein), gamma 3	542.694	-0.520789	0.158657	-3.28249	0.00102896	0.0315101	0.696991	2317
ENSMUSG00000043850	Clrn1	58844028	58885340	42.27	protein_coding	clarin 1	26.6984	-0.524451	0.179962	-2.91422	0.00356576	0.0644564	0.695224	41312
ENSMUSG00000048001	Hes5	154960923	154962371	63.98	protein_coding	hairy and enhancer of split 5 (Drosophila)	49.1472	-0.524667	0.172924	-3.03409	0.00241262	0.0501857	0.69512	1448
ENSMUSG00000071550	Cfap44	44394796	44482428	42.23	protein_coding	cilia and flagella associated protein 44	61.2141	-0.527431	0.173979	-3.03157	0.00243283	0.0503082	0.693789	87632
ENSMUSG00000030795	Fus	127967457	127982368	43.31	protein_coding	fused in sarcoma	865.244	-0.527671	0.168229	-3.13662	0.00170908	0.0416136	0.693674	14911
ENSMUSG00000084915	C230037L18Rik	89476236	89484847	45.84	antisense	RIKEN cDNA C230037L18 gene	18.6275	-0.527824	0.176678	-2.9875	0.00281273	0.0546928	0.6936	8611
ENSMUSG00000059854	Hydin	110266977	110610253	44.69	protein_coding	HYDIN, axonemal central pair apparatus protein	38.9387	-0.528612	0.178985	-2.95338	0.0031431	0.0592924	0.693222	343276
ENSMUSG00000096141	Dnah7a	53397006	53706784	39.94	protein_coding	dynein, axonemal, heavy chain 7A	47.5689	-0.529133	0.170067	-3.11133	0.00186249	0.0439127	0.692971	309778
ENSMUSG00000071984	Fndc1	7738569	7827302	44.97	protein_coding	fibronectin type III domain containing 1	57.0981	-0.529684	0.164328	-3.22334	0.00126706	0.0350112	0.692706	88733
ENSMUSG00000024620	Pdgfrb	61045150	61085061	51.52	protein_coding	platelet derived growth factor receptor, beta polypeptide	222.846	-0.531569	0.133485	-3.98225	6.82666e-05	0.00427527	0.691802	39911
ENSMUSG00000037016	Frem2	53513939	53657355	43.86	protein_coding	Fras1 related extracellular matrix protein 2	58.1934	-0.534102	0.165714	-3.22303	0.00126843	0.0350112	0.690588	143416
ENSMUSG00000040138	Ndp	16885521	16911774	41.48	protein_coding	Norrie disease (pseudoglioma) (human)	50.2589	-0.534561	0.143635	-3.72167	0.000197906	0.00952985	0.690369	26253
ENSMUSG00000058897	Col25a1	130180891	130599877	41.11	protein_coding	collagen, type XXV, alpha 1	1044.33	-0.536912	0.154747	-3.4696	0.000521225	0.0197455	0.689244	418986
ENSMUSG00000019768	Esr1	4611593	5005614	41.08	protein_coding	estrogen receptor 1 (alpha)	58.7067	-0.539288	0.179356	-3.0068	0.0026401	0.0528895	0.688111	394021
ENSMUSG00000033949	Trim36	46165302	46212607	42.12	protein_coding	tripartite motif-containing 36	53.7524	-0.543177	0.169876	-3.19748	0.00138632	0.0366733	0.686258	47305
ENSMUSG00000057604	Lmcd1	112273758	112330425	44.59	protein_coding	LIM and cysteine-rich domains 1	33.4183	-0.543276	0.164861	-3.29536	0.000982945	0.0303013	0.686211	56667
ENSMUSG00000075511	1700001L05Rik	83357526	83367282	45.49	lincRNA	RIKEN cDNA 1700001L05 gene	33.6224	-0.543458	0.156094	-3.4816	0.000498428	0.0190543	0.686124	9756
ENSMUSG00000038112	AW551984	39587396	39604403	40.75	protein_coding	expressed sequence AW551984	94.4284	-0.544026	0.179902	-3.02402	0.00249444	0.051302	0.685854	17007
ENSMUSG00000045259	Klhdc9	171358446	171360798	50.7	protein_coding	kelch domain containing 9	30.8257	-0.544895	0.166355	-3.27551	0.00105473	0.031745	0.685441	2352
ENSMUSG00000044167	Foxo1	52268336	52353221	44.28	protein_coding	forkhead box O1	172.421	-0.545023	0.171523	-3.17754	0.0014853	0.0383831	0.685381	84885
ENSMUSG00000035944	Ttc38	85832306	85858822	50.87	protein_coding	tetratricopeptide repeat domain 38	32.2788	-0.545567	0.157417	-3.46574	0.000528776	0.0197633	0.685122	26516
ENSMUSG00000032489	Kif9	110476958	110525174	45.75	protein_coding	kinesin family member 9	47.1437	-0.547729	0.147182	-3.72143	0.000198096	0.00952985	0.684096	48216
ENSMUSG00000054509	Parp4	56575619	56659794	44.37	protein_coding	poly (ADP-ribose) polymerase family, member 4	55.1006	-0.548646	0.143818	-3.81487	0.000136257	0.00712172	0.683661	84175
ENSMUSG00000070713	Gm10282	72304118	72305276	45.04	protein_coding	predicted pseudogene 10282	22.5271	-0.553675	0.176207	-3.14218	0.00167694	0.0411916	0.681283	1158
ENSMUSG00000060579	Fhit	9550092	11162035	40.06	protein_coding	fragile histidine triad gene	27.0033	-0.554241	0.174072	-3.18398	0.00145267	0.0378188	0.681015	1611943
ENSMUSG00000025911	Adhfe1	9547948	9580673	43.16	protein_coding	alcohol dehydrogenase, iron containing, 1	63.3098	-0.560881	0.14135	-3.96802	7.24729e-05	0.00443873	0.677888	32725
ENSMUSG00000041144	Dnah7b	46066315	46373546	39.6	protein_coding	dynein, axonemal, heavy chain 7B	42.9142	-0.562294	0.160668	-3.49973	0.000465728	0.0180363	0.677225	307231
ENSMUSG00000056752	Dnah9	65831282	66168551	42.23	protein_coding	dynein, axonemal, heavy chain 9	75.2758	-0.565926	0.166147	-3.40617	0.000658801	0.0228658	0.675522	337269
ENSMUSG00000042851	Zc3h6	128967402	129018563	38.72	protein_coding	zinc finger CCCH type containing 6	332.466	-0.565953	0.0966846	-5.8536	4.81038e-09	2.15738e-06	0.675509	51161
ENSMUSG00000020653	Klf11	24651371	24662774	47.84	protein_coding	Kruppel-like factor 11	67.3615	-0.574072	0.139419	-4.11759	3.82847e-05	0.00275789	0.671718	11403
ENSMUSG00000087881	Gm22442	69350518	69350661	60.42	snoRNA	predicted gene, 22442	306.637	-0.575795	0.135067	-4.26304	2.01661e-05	0.00174829	0.670916	143	scaRNA21
ENSMUSG00000005268	Prlr	10177238	10349180	40.18	protein_coding	prolactin receptor	62.0117	-0.577216	0.179765	-3.21096	0.00132294	0.035576	0.670256	171942
ENSMUSG00000097462	9530026P05Rik	92940369	93272889	41.55	lincRNA	RIKEN cDNA 9530026P05 gene	38.4268	-0.579459	0.176277	-3.2872	0.00101188	0.0310557	0.669214	332520
ENSMUSG00000097825	9630001P10Rik	45638705	45645469	40.92	lincRNA	RIKEN cDNA 9630001P10 gene	21.1459	-0.583171	0.169971	-3.431	0.000601367	0.0215485	0.667495	6764
ENSMUSG00000052374	Actn2	12269426	12340760	45.36	protein_coding	actinin alpha 2	84.8129	-0.583276	0.171919	-3.39273	0.000691993	0.0236965	0.667446	71334
ENSMUSG00000026650	Meig1	3409043	3422648	41.06	protein_coding	meiosis expressed gene 1	20.6378	-0.583875	0.178829	-3.265	0.00109464	0.0325187	0.667169	13605
ENSMUSG00000031786	Drc7	95055103	95078141	49.79	protein_coding	dynein regulatory complex subunit 7	19.5205	-0.58413	0.174258	-3.35211	0.000801987	0.0262833	0.667051	23038
ENSMUSG00000074227	Spint2	29256331	29281977	47.98	protein_coding	serine protease inhibitor, Kunitz type 2	56.999	-0.588922	0.169944	-3.46539	0.000529465	0.0197633	0.664839	25646
ENSMUSG00000047161	Chst9	15451924	15760157	40.05	protein_coding	carbohydrate (N-acetylgalactosamine 4-0) sulfotransferase 9	38.3627	-0.589972	0.168356	-3.50431	0.000457795	0.0178283	0.664356	308233
ENSMUSG00000037681	Esyt3	99309963	99358557	49.26	protein_coding	extended synaptotagmin-like protein 3	20.0446	-0.59048	0.178285	-3.31201	0.000926297	0.0291053	0.664122	48594
ENSMUSG00000041577	Prelp	133910304	133921414	50.52	protein_coding	proline arginine-rich end leucine-rich repeat	120.72	-0.591408	0.171106	-3.45638	0.000547484	0.0200307	0.663695	11110
ENSMUSG00000075316	Scn9a	66480080	66634962	37.48	protein_coding	sodium channel, voltage-gated, type IX, alpha	35.3164	-0.592834	0.17986	-3.2961	0.000980388	0.0302896	0.663039	154882
ENSMUSG00000000567	Sox9	112782224	112787760	50.95	protein_coding	SRY (sex determining region Y)-box 9	184.959	-0.59391	0.172285	-3.44725	0.000566317	0.0206113	0.662545	5536
ENSMUSG00000039087	Rreb1	37778400	37952002	45.46	protein_coding	ras responsive element binding protein 1	158.337	-0.601221	0.140302	-4.28519	1.82583e-05	0.00163771	0.659196	173602
ENSMUSG00000020961	Ston2	91638542	91788387	45.51	protein_coding	stonin 2	73.2179	-0.605742	0.157323	-3.8503	0.000117973	0.0063573	0.657133	149845
ENSMUSG00000028004	Npy2r	82538383	82548084	43.02	protein_coding	neuropeptide Y receptor Y2	139.894	-0.613245	0.177329	-3.45823	0.000543745	0.0199992	0.653725	9701
ENSMUSG00000045328	Cenpe	135212563	135273540	41.67	protein_coding	centromere protein E	35.7618	-0.618755	0.155281	-3.98474	6.75549e-05	0.00426916	0.651233	60977
ENSMUSG00000036030	Prtg	72806874	72917291	43.88	protein_coding	protogenin homolog (Gallus gallus)	39.0456	-0.61998	0.160899	-3.85323	0.000116569	0.00630608	0.65068	110417
ENSMUSG00000025370	Cdh9	16778101	16857094	35.59	protein_coding	cadherin 9	402.47	-0.622882	0.151897	-4.10067	4.11947e-05	0.0029318	0.649373	78993
ENSMUSG00000038630	Zkscan16	58943628	58958355	43.54	protein_coding	zinc finger with KRAB and SCAN domains 16	534.532	-0.623028	0.142662	-4.36715	1.25877e-05	0.00125578	0.649306	14727
ENSMUSG00000030043	Tacr1	82402475	82560103	43.43	protein_coding	tachykinin receptor 1	25.8938	-0.64007	0.172617	-3.70803	0.000208878	0.00994532	0.641682	157628
ENSMUSG00000039239	Tgfb2	186622792	186705989	45.37	protein_coding	transforming growth factor, beta 2	148.978	-0.641446	0.121049	-5.29904	1.1641e-07	2.59081e-05	0.64107	83197
ENSMUSG00000062960	Kdr	75932827	75978458	44.53	protein_coding	kinase insert domain protein receptor	168.577	-0.64268	0.138925	-4.6261	3.7262e-06	0.000475279	0.640522	45631
ENSMUSG00000020799	Tekt1	72344722	72362442	47.49	protein_coding	tektin 1	21.8715	-0.649294	0.17775	-3.65286	0.000259338	0.0116454	0.637592	17720
ENSMUSG00000075270	Pde11a	75989141	76338774	42.45	protein_coding	phosphodiesterase 11A	54.208	-0.651538	0.168074	-3.8765	0.000105972	0.00599987	0.636601	349633
ENSMUSG00000026247	Ecel1	87147655	87156521	58.33	protein_coding	endothelin converting enzyme-like 1	49.892	-0.652962	0.17695	-3.69009	0.000224178	0.0105295	0.635973	8866
ENSMUSG00000016028	Celsr1	85898758	86033777	51.05	protein_coding	cadherin, EGF LAG seven-pass G-type receptor 1 (flamingo homolog, Drosophila)	82.0019	-0.658132	0.147907	-4.44963	8.60173e-06	0.000956719	0.633698	135019
ENSMUSG00000038872	Zfhx3	108703100	108961630	49.04	protein_coding	zinc finger homeobox 3	72.9015	-0.659311	0.168165	-3.92063	8.83192e-05	0.00513766	0.633181	258530
ENSMUSG00000039963	Ccdc40	119228572	119265236	51.67	protein_coding	coiled-coil domain containing 40	20.3405	-0.674686	0.172679	-3.90717	9.33834e-05	0.00536492	0.626469	36664
ENSMUSG00000051354	Samd3	26229707	26272172	41.11	protein_coding	sterile alpha motif domain containing 3	15.4026	-0.677096	0.179312	-3.77609	0.000159312	0.00808364	0.625423	42465
ENSMUSG00000032940	Rbm11	75592844	75602829	39.75	protein_coding	RNA binding motif protein 11	83.7928	-0.681709	0.13705	-4.97416	6.55296e-07	0.000123116	0.623426	9985
ENSMUSG00000027217	Tspan18	93201760	93334505	50.74	protein_coding	tetraspanin 18	20.1909	-0.6837	0.179317	-3.8128	0.000137401	0.00713962	0.622567	132745
ENSMUSG00000019230	Lhx9	138825186	138848577	43.97	protein_coding	LIM homeobox protein 9	26.862	-0.69222	0.171793	-4.02938	5.59232e-05	0.00361628	0.618901	23391
ENSMUSG00000060735	Rxfp3	11033717	11037991	52.3	protein_coding	relaxin family peptide receptor 3	52.0401	-0.694189	0.164801	-4.21229	2.52796e-05	0.00206742	0.618057	4274
ENSMUSG00000047507	Baiap3	25242659	25256364	57.19	protein_coding	BAI1-associated protein 3	100.731	-0.701969	0.178181	-3.93965	8.16022e-05	0.00484836	0.614733	13705
ENSMUSG00000102692	Dchs2	83127948	83357209	41.93	protein_coding	dachsous 2 (Drosophila)	106.548	-0.704668	0.172184	-4.09253	4.267e-05	0.00299616	0.613584	229261
ENSMUSG00000022708	Zbtb20	42875881	43642602	38.62	protein_coding	zinc finger and BTB domain containing 20	1408.82	-0.71827	0.120168	-5.97723	2.26966e-09	1.15337e-06	0.607826	766721
ENSMUSG00000054889	Dsp	38151328	38198577	45.28	protein_coding	desmoplakin	44.9709	-0.727922	0.158978	-4.57877	4.67727e-06	0.000575469	0.603773	47249
ENSMUSG00000045333	Zfp423	87661810	87959595	49.76	protein_coding	zinc finger protein 423	194.369	-0.741198	0.161043	-4.60249	4.17477e-06	0.0005229	0.598242	297785
ENSMUSG00000045257	Morn2	80290212	80297473	42.1	protein_coding	MORN repeat containing 2	77.7055	-0.745758	0.161124	-4.62848	3.68363e-06	0.0004742	0.596354	7261
ENSMUSG00000049154	Fam183b	58792797	58801960	47.23	protein_coding	family with sequence similarity 183, member B	22.565	-0.747296	0.179422	-4.16503	3.11313e-05	0.00236513	0.595719	9163
ENSMUSG00000020788	Atp2a3	72961169	72993044	51.79	protein_coding	ATPase, Ca++ transporting, ubiquitous	48.5148	-0.772577	0.165097	-4.67955	2.87511e-06	0.000395769	0.585371	31875
ENSMUSG00000045930	Clec14a	58264720	58269258	44.53	protein_coding	C-type lectin domain family 14, member a	66.59	-0.775584	0.145396	-5.33427	9.59273e-08	2.26047e-05	0.584152	4538
ENSMUSG00000021136	Smoc1	81026808	81186414	45.42	protein_coding	SPARC related modular calcium binding 1	76.7439	-0.797634	0.179759	-4.43725	9.11163e-06	0.000982007	0.575292	159606
ENSMUSG00000026579	F5	164151838	164220277	41.94	protein_coding	coagulation factor V	44.8281	-0.808226	0.178657	-4.5239	6.07099e-06	0.000697561	0.571083	68439
ENSMUSG00000002835	Chaf1a	56040416	56068026	48.05	protein_coding	chromatin assembly factor 1, subunit A (p150)	32.7685	-0.83243	0.156518	-5.31843	1.04664e-07	2.42524e-05	0.561583	27610
ENSMUSG00000054667	Irs4	141710998	141725263	42.43	protein_coding	insulin receptor substrate 4	15.3483	-0.841187	0.176158	-4.77517	1.79556e-06	0.000271344	0.558184	14265
ENSMUSG00000030048	Gkn3	87383268	87388935	48.75	protein_coding	gastrokine 3	30.0303	-0.85363	0.173668	-4.9153	8.86478e-07	0.000156009	0.55339	5667
ENSMUSG00000070357	Cfap46	139600951	139616329	52.27	protein_coding	cilia and flagella associated protein 46	24.1744	-0.855017	0.17746	-4.81808	1.44948e-06	0.000231634	0.552859	15378
ENSMUSG00000099384	1700110C19Rik	10324602	10329307	48.02	lincRNA	RIKEN cDNA 1700110C19 gene	39.0947	-0.909957	0.16719	-5.44264	5.24955e-08	1.39039e-05	0.532201	4705
ENSMUSG00000051497	Kcnj16	110968033	111027968	40.24	protein_coding	potassium inwardly-rectifying channel, subfamily J, member 16	146.12	-1.08774	0.154427	-7.04369	1.87218e-12	1.99148e-09	0.470499	59935

## Sheet: GF-GFsi
Ensembl Gene ID	Associated Gene Name	Gene Start (bp)	Gene End (bp)	% GC content	Gene type	Description	baseMean	log2FoldChange	lfcSE	stat	pvalue	padj		FC	Gene length
ENSMUSG00000028341	Nr4a3	48045153	48086447	46.08	protein_coding	nuclear receptor subfamily 4, group A, member 3	893.414	1.43626	0.105365	13.6312	2.61222e-42	4.03223e-38		2.70618	41294
ENSMUSG00000029135	Fosl2	32136472	32157831	50.23	protein_coding	fos-like antigen 2	853.346	1.19094	0.116241	10.2454	1.24056e-24	6.38307e-21		2.28301	21359
ENSMUSG00000003545	Fosb	19302721	19310045	54.95	protein_coding	FBJ osteosarcoma oncogene B	367.131	1.18081	0.148082	7.97405	1.53561e-15	1.68233e-12		2.26705	7324
ENSMUSG00000089417	Gm22009	69085105	69085447	39.36	snoRNA	predicted gene, 22009	831.551	1.1201	0.153553	7.29454	2.99678e-13	1.77916e-10	ScaRNA7	2.17362	342
ENSMUSG00000025316	Banp	121949750	122029258	50.13	protein_coding	BTG3 associated nuclear protein	380.478	1.02984	0.0948582	10.8566	1.8543e-27	1.43115e-23		2.0418	79508
ENSMUSG00000048482	Bdnf	109674700	109727007	40.8	protein_coding	brain derived neurotrophic factor	929.55	1.02977	0.112158	9.18142	4.25439e-20	8.20884e-17		2.0417	52307
ENSMUSG00000035021	Baz1a	54892989	55014348	42.12	protein_coding	bromodomain adjacent to zinc finger domain 1A	132.78	0.987802	0.166311	5.93949	2.85909e-09	5.74842e-07		1.98316	121359
ENSMUSG00000007682	Dio2	90724554	90738438	42.09	protein_coding	deiodinase, iodothyronine, type II	2604.01	0.971828	0.159124	6.10735	1.013e-09	2.44322e-07		1.96132	13884
ENSMUSG00000055866	Per2	91415982	91459324	51.23	protein_coding	period circadian clock 2	662.852	0.966745	0.125598	7.69711	1.39176e-14	1.13069e-11		1.95443	43342
ENSMUSG00000019916	P4ha1	59323296	59373304	41.47	protein_coding	procollagen-proline, 2-oxoglutarate 4-dioxygenase (proline 4-hydroxylase), alpha 1 polypeptide	1123.81	0.905889	0.0988645	9.16293	5.05064e-20	8.66241e-17		1.8737	50008
ENSMUSG00000031530	Dusp4	34807297	34819894	51.87	protein_coding	dual specificity phosphatase 4	280.615	0.896147	0.142101	6.30642	2.85572e-10	8.31716e-08		1.86109	12597
ENSMUSG00000026864	Hspa5	34771970	34777547	44.42	protein_coding	heat shock protein 5	5505.38	0.888508	0.101421	8.76061	1.94192e-18	2.99755e-15		1.85126	5577
ENSMUSG00000001774	Chordc1	18292267	18314000	38.39	protein_coding	cysteine and histidine-rich domain (CHORD)-containing, zinc-binding protein 1	1276.17	0.84404	0.0850561	9.92333	3.29573e-23	8.47881e-20		1.79507	21733
ENSMUSG00000029817	Tra2a	49243921	49264052	40.47	protein_coding	transformer 2 alpha homolog (Drosophila)	688.905	0.843048	0.109772	7.67998	1.59114e-14	1.22804e-11		1.79384	20131
ENSMUSG00000038418	Egr1	34859823	34864984	57.77	protein_coding	early growth response 1	1926.61	0.839008	0.159471	5.26121	1.4311e-07	1.62429e-05		1.78882	5161
ENSMUSG00000031245	Hmgn5	109004534	109013404	38.85	protein_coding	high-mobility group nucleosome binding domain 5	56.1024	0.827568	0.167371	4.94451	7.63356e-07	6.43889e-05		1.77469	8870
ENSMUSG00000091971	Hspa1a	34969190	34972156	58.95	protein_coding	heat shock protein 1A	76.0522	0.810104	0.167692	4.83091	1.35912e-06	0.00010284		1.75334	2966
ENSMUSG00000041324	Inhba	16011851	16027211	45.35	protein_coding	inhibin beta-A	167.727	0.808378	0.178057	4.53999	5.62567e-06	0.00033921		1.75124	15360
ENSMUSG00000077394	Gm24339	15326464	15326539	44.74	snoRNA	predicted gene, 24339	18.7608	0.808371	0.178279	4.53432	5.77905e-06	0.000345757	snoU2_19	1.75123	75
ENSMUSG00000007617	Homer1	93303757	93404129	37.92	protein_coding	homer homolog 1 (Drosophila)	7465.16	0.806447	0.140433	5.74256	9.32559e-09	1.56467e-06		1.7489	100372
ENSMUSG00000032265	Fam46a	85320439	85327348	44.36	protein_coding	family with sequence similarity 46, member A	111.524	0.801183	0.132347	6.05365	1.41599e-09	3.36264e-07		1.74253	6909
ENSMUSG00000023067	Cdkn1a	29090979	29100722	53.89	protein_coding	cyclin-dependent kinase inhibitor 1A (P21)	121.58	0.791872	0.171592	4.61485	3.93387e-06	0.000246842		1.73132	9743
ENSMUSG00000042599	Kdm7a	39136623	39206789	39.33	protein_coding	lysine (K)-specific demethylase 7A	1963.08	0.789567	0.0779114	10.1342	3.89696e-24	1.20307e-20		1.72856	70166
ENSMUSG00000036052	Dnajb5	42949814	42959425	54.02	protein_coding	DnaJ (Hsp40) homolog, subfamily B, member 5	1035.82	0.788402	0.123461	6.38581	1.70488e-10	5.20688e-08		1.72716	9611
ENSMUSG00000018476	Kdm6b	69398508	69413675	56.8	protein_coding	KDM1 lysine (K)-specific demethylase 6B	254.958	0.783691	0.132493	5.91496	3.31955e-09	6.40506e-07		1.72153	15167
ENSMUSG00000051590	Map3k19	127815253	127840321	44.19	protein_coding	mitogen-activated protein kinase kinase kinase 19	227.619	0.782666	0.123755	6.32432	2.54355e-10	7.55043e-08		1.72031	25068
ENSMUSG00000000184	Ccnd2	127125779	127151048	49.3	protein_coding	cyclin D2	1050.69	0.770709	0.107286	7.1837	6.78509e-13	3.49116e-10		1.70611	25269
ENSMUSG00000029657	Hsph1	149614287	149636376	45.5	protein_coding	heat shock 105kDa/110kDa protein 1	6612.6	0.770133	0.0786758	9.7887	1.25902e-22	2.77632e-19		1.70543	22089
ENSMUSG00000063632	Sox11	27334264	27342574	46.48	protein_coding	SRY (sex determining region Y)-box 11	730.859	0.766083	0.135788	5.64176	1.68321e-08	2.67857e-06		1.70065	8310
ENSMUSG00000024066	Xdh	73883908	73950182	44.57	protein_coding	xanthine dehydrogenase	54.6057	0.746387	0.173367	4.30524	1.66808e-05	0.00072942		1.67759	66274
ENSMUSG00000081788	Gm5898	63542479	63544549	50.8	processed_pseudogene	predicted gene 5898	47.7487	0.738303	0.141449	5.21955	1.79359e-07	1.94753e-05		1.66821	2070
ENSMUSG00000056749	Nfil3	52967209	52981073	48.93	protein_coding	nuclear factor, interleukin 3, regulated	120.913	0.730998	0.134935	5.4174	6.04704e-08	7.84387e-06		1.65979	13864
ENSMUSG00000030235	Slco1c1	141524386	141570177	39.57	protein_coding	solute carrier organic anion transporter family, member 1c1	1270.65	0.727089	0.101801	7.14228	9.17965e-13	4.57088e-10		1.6553	45791
ENSMUSG00000049892	Rasd1	59963181	59964944	53.8	protein_coding	RAS, dexamethasone-induced 1	48.2952	0.717182	0.164675	4.35514	1.32984e-05	0.000627332		1.64397	1763
ENSMUSG00000006362	Cbfa2t3	122628739	122699109	53.73	protein_coding	core-binding factor, runt domain, alpha subunit 2, translocated to, 3 (human)	190.108	0.717176	0.142377	5.03715	4.72517e-07	4.19182e-05		1.64396	70370
ENSMUSG00000031608	Galnt7	57523828	57653032	43.56	protein_coding	UDP-N-acetyl-alpha-D-galactosamine: polypeptide N-acetylgalactosaminyltransferase 7	250.225	0.709579	0.108678	6.5292	6.61224e-11	2.43015e-08		1.63533	129204
ENSMUSG00000030103	Bhlhe40	108660629	108666925	47.28	protein_coding	basic helix-loop-helix family, member e40	981.571	0.704312	0.148381	4.74665	2.06814e-06	0.000145108		1.62937	6296
ENSMUSG00000023272	Creld2	88819646	88826681	53.75	protein_coding	cysteine-rich with EGF-like domains 2	171.218	0.695762	0.119543	5.82018	5.87859e-09	1.05514e-06		1.61974	7035
ENSMUSG00000025823	Pdia4	47796142	47813512	45.79	protein_coding	protein disulfide isomerase associated 4	1091.68	0.693512	0.0918776	7.54822	4.41236e-14	3.09587e-11		1.61722	17370
ENSMUSG00000059659	Gm10069	128438757	128475617	46.39	lincRNA	predicted gene 10069	11.467	0.691293	0.177593	3.89257	9.91869e-05	0.00288877		1.61473	36860
ENSMUSG00000040363	Bcor	12036740	12160355	51.07	protein_coding	BCL6 interacting corepressor	615.441	0.681357	0.117369	5.80528	6.42581e-09	1.11448e-06		1.60365	123615
ENSMUSG00000049230	Gm9833	10088110	10092565	41.85	protein_coding	predicted gene 9833	45.1272	0.676924	0.171145	3.95527	7.64491e-05	0.0023888		1.59873	4455
ENSMUSG00000026605	Cenpf	189640606	189688086	41.15	protein_coding	centromere protein F	53.209	0.676885	0.157612	4.29462	1.74989e-05	0.000752406		1.59868	47480
ENSMUSG00000024042	Sik1	31844248	31855792	53.92	protein_coding	salt inducible kinase 1	309.66	0.674733	0.131439	5.13342	2.84529e-07	2.77974e-05		1.5963	11544
ENSMUSG00000037112	Sik2	50892801	51009073	39.99	protein_coding	salt inducible kinase 2	681.96	0.673552	0.11131	6.05113	1.43833e-09	3.36395e-07		1.59499	116272
ENSMUSG00000051335	Gfod1	43195519	43304172	47.51	protein_coding	glucose-fructose oxidoreductase domain containing 1	2040.82	0.665539	0.123169	5.40344	6.53732e-08	8.40917e-06		1.58616	108653
ENSMUSG00000022769	Sdf2l1	17130138	17132383	55.61	protein_coding	stromal cell-derived factor 2-like 1	51.3965	0.652919	0.158199	4.12721	3.67186e-05	0.00133676		1.57235	2245
ENSMUSG00000089774	Slc5a3	92058322	92087473	42.68	protein_coding	solute carrier family 5 (inositol transporters), member 3	1913.88	0.651798	0.0871664	7.47762	7.56783e-14	5.079e-11		1.57112	29151
ENSMUSG00000032846	Zswim6	107724618	107890064	42.78	protein_coding	zinc finger SWIM-type containing 6	660.968	0.647541	0.0836681	7.7394	9.98894e-15	8.56607e-12		1.5665	165446
ENSMUSG00000104394	RP23-306B14.3	187236457	187238718	41.16	TEC		38.8779	0.642486	0.157253	4.08568	4.39475e-05	0.00152162		1.56102	2261
ENSMUSG00000025351	Cd63	128908919	128912816	58.18	protein_coding	CD63 antigen	148.332	0.638382	0.13024	4.9016	9.50607e-07	7.60289e-05		1.55658	3897
ENSMUSG00000079139	Gm4204	135231995	135233225	43.87	processed_pseudogene	predicted gene 4204	124.907	0.636745	0.165593	3.84525	0.00012043	0.00330918		1.55482	1230
ENSMUSG00000032501	Trib1	59648350	59656550	52.63	protein_coding	tribbles homolog 1 (Drosophila)	122.958	0.627458	0.168893	3.71513	0.000203096	0.0048305		1.54484	8200
ENSMUSG00000031609	Sap30	57482707	57487860	41.19	protein_coding	sin3 associated polypeptide	81.6988	0.626095	0.151599	4.12993	3.62867e-05	0.00132417		1.54338	5153
ENSMUSG00000024014	Pim1	29490812	29496111	52.74	protein_coding	proviral integration site 1	86.8406	0.625003	0.163715	3.81764	0.000134736	0.00358958		1.54221	5299
ENSMUSG00000038374	Rbm8a	96629928	96633779	43.46	protein_coding	RNA binding motif protein 8a	691.332	0.62198	0.121859	5.1041	3.32377e-07	3.1284e-05		1.53899	3851
ENSMUSG00000067279	Ppp1r3c	36731737	36736653	43.64	protein_coding	protein phosphatase 1, regulatory (inhibitor) subunit 3C	1682.35	0.620693	0.120368	5.15661	2.51464e-07	2.50426e-05		1.53761	4916
ENSMUSG00000020513	Tubd1	86544991	86567360	45.42	protein_coding	tubulin, delta 1	70.7096	0.617363	0.134578	4.58741	4.48775e-06	0.000277091		1.53407	22369
ENSMUSG00000001768	Rin2	145784734	145887616	45.27	protein_coding	Ras and Rab interactor 2	682.576	0.617129	0.0940765	6.55986	5.38576e-11	2.13166e-08		1.53382	102882
ENSMUSG00000048878	Hexim1	103116231	103119725	49.21	protein_coding	hexamethylene bis-acetamide inducible 1	1009.08	0.61674	0.0944237	6.53162	6.50617e-11	2.43015e-08		1.53341	3494
ENSMUSG00000024222	Fkbp5	28399095	28517524	45.28	protein_coding	FK506 binding protein 5	406.146	0.616665	0.15505	3.97721	6.97272e-05	0.00221804		1.53333	118429
ENSMUSG00000021892	Sh3bp5	31359880	31436078	47.26	protein_coding	SH3-domain binding protein 5 (BTK-associated)	651.986	0.614354	0.102471	5.99537	2.03022e-09	4.60861e-07		1.53087	76198
ENSMUSG00000026628	Atf3	191170296	191218039	46.24	protein_coding	activating transcription factor 3	7.97468	0.612957	0.17472	3.50823	0.000451103	0.00859657		1.52939	47743
ENSMUSG00000099583	Hist1h3d	23575763	23576322	60.71	protein_coding	histone cluster 1, H3d	20.5067	0.612087	0.176063	3.47652	0.000507971	0.00941302		1.52847	559
ENSMUSG00000007850	Hnrnph1	50376990	50386528	39.93	protein_coding	heterogeneous nuclear ribonucleoprotein H1	2223.33	0.611978	0.159156	3.84514	0.000120482	0.00330918		1.52835	9538
ENSMUSG00000028214	Gem	11704457	11714752	45.46	protein_coding	GTP binding protein (gene overexpressed in skeletal muscle)	49.0584	0.610159	0.178314	3.42182	0.000622041	0.0108251		1.52643	10295
ENSMUSG00000035621	Midn	80148272	80158368	59.78	protein_coding	midnolin	556.652	0.609616	0.119011	5.12235	3.01759e-07	2.91122e-05		1.52585	10096
ENSMUSG00000002017	Fam98a	75537086	75551946	42.35	protein_coding	family with sequence similarity 98, member A	615.703	0.609234	0.161948	3.76192	0.000168613	0.0042179		1.52545	14860
ENSMUSG00000022185	Acin1	54642161	54686931	45.59	protein_coding	apoptotic chromatin condensation inducer 1	1437	0.606383	0.0988675	6.13329	8.60821e-10	2.21461e-07		1.52244	44770
ENSMUSG00000032487	Ptgs2	150100031	150108227	38.16	protein_coding	prostaglandin-endoperoxide synthase 2	151.406	0.604775	0.176579	3.42496	0.00061488	0.0107368		1.52074	8196
ENSMUSG00000045671	Spred2	19924375	20024026	46.83	protein_coding	sprouty-related, EVH1 domain containing 2	758.365	0.604321	0.116523	5.1863	2.14512e-07	2.2373e-05		1.52026	99651
ENSMUSG00000033792	Atp7a	106027276	106124926	39.8	protein_coding	ATPase, Cu++ transporting, alpha polypeptide	213.278	0.601849	0.101081	5.95414	2.6145e-09	5.4537e-07		1.51766	97650
ENSMUSG00000010554	Mettl16	74770830	74828525	42.72	protein_coding	methyltransferase like 16	739.942	0.600678	0.0588106	10.2138	1.72033e-24	6.63874e-21		1.51643	57695
ENSMUSG00000023232	Serinc2	130253495	130279205	51.23	protein_coding	serine incorporator 2	17.2164	0.60021	0.176264	3.40517	0.000661234	0.0112286		1.51594	25710
ENSMUSG00000071757	Zhx2	57694665	57839832	47.54	protein_coding	zinc fingers and homeoboxes 2	238.577	0.599957	0.10167	5.90102	3.61256e-09	6.80042e-07		1.51567	145167
ENSMUSG00000027520	Zdbf2	63273265	63314576	38.27	protein_coding	zinc finger, DBF-type containing 2	1389.37	0.599295	0.12058	4.97009	6.69211e-07	5.67579e-05		1.51498	41311
ENSMUSG00000004460	Dnajb11	22857845	22879634	44.76	protein_coding	DnaJ (Hsp40) homolog, subfamily B, member 11	859.114	0.5989	0.091922	6.51531	7.25418e-11	2.60408e-08		1.51456	21789
ENSMUSG00000071341	Egr4	85511131	85513589	68.48	protein_coding	early growth response 4	64.7448	0.598163	0.159657	3.74655	0.000179282	0.00438574		1.51379	2458
ENSMUSG00000059991	Nptx2	144545887	144557478	51.98	protein_coding	neuronal pentraxin 2	596.386	0.597654	0.157829	3.78671	0.000152652	0.00394697		1.51325	11591
ENSMUSG00000055491	Pprc1	46044886	46072915	49.08	protein_coding	peroxisome proliferative activated receptor, gamma, coactivator-related 1	161.255	0.596752	0.110805	5.38559	7.22078e-08	9.06179e-06		1.51231	28029
ENSMUSG00000048701	Ccdc6	70097121	70193200	47.99	protein_coding	coiled-coil domain containing 6	876.272	0.593466	0.0733521	8.09065	5.93469e-16	7.04676e-13		1.50887	96079
ENSMUSG00000055805	Fmnl1	103171107	103198901	53.19	protein_coding	formin-like 1	619.503	0.592679	0.144333	4.10633	4.02002e-05	0.00141674		1.50804	27794
ENSMUSG00000031880	Rrad	104628066	104631321	54.12	protein_coding	Ras-related associated with diabetes	36.4865	0.592475	0.173969	3.40564	0.000660089	0.0112215		1.50783	3255
ENSMUSG00000070544	Top1	160645888	160722764	38.7	protein_coding	topoisomerase (DNA) I	1624.35	0.590593	0.0819892	7.2033	5.87709e-13	3.23996e-10		1.50587	76876
ENSMUSG00000043079	Synpo	60593973	60660142	51.16	protein_coding	synaptopodin	1572.81	0.588145	0.119389	4.92629	8.38054e-07	6.91776e-05		1.50331	66169
ENSMUSG00000015748	Prpf3	95830124	95855885	41.12	protein_coding	PRP3 pre-mRNA processing factor 3 homolog (yeast)	306.862	0.588052	0.12703	4.62923	3.67027e-06	0.000234533		1.50322	25761
ENSMUSG00000020048	Hsp90b1	86690209	86705509	42.75	protein_coding	heat shock protein 90, beta (Grp94), member 1	7950.54	0.587738	0.0919138	6.39444	1.61133e-10	5.07601e-08		1.50289	15300
ENSMUSG00000048100	Taf13	108571698	108583222	42.31	protein_coding	TAF13 RNA polymerase II, TATA box binding protein (TBP)-associated factor	241.014	0.587719	0.161987	3.62819	0.000285415	0.00612749		1.50287	11524
ENSMUSG00000020032	Nuak1	84370905	84440597	47.97	protein_coding	NUAK family, SNF1-like kinase, 1	1393.97	0.587662	0.124228	4.73052	2.23948e-06	0.000156419		1.50281	69692
ENSMUSG00000020069	Hnrnph3	63014664	63024217	42.58	protein_coding	heterogeneous nuclear ribonucleoprotein H3	276.901	0.5876	0.170876	3.43875	0.000584413	0.0104048		1.50274	9553
ENSMUSG00000097967	Gm27002	115200398	115203875	49.65	sense_intronic	predicted gene, 27002	13.8947	0.587093	0.178259	3.29348	0.000989566	0.0147584		1.50222	3477
ENSMUSG00000079419	Ms4a6c	11469366	11482192	40.02	protein_coding	membrane-spanning 4-domains, subfamily A, member 6C	13.4489	0.58678	0.17718	3.31177	0.000927094	0.0141889		1.50189	12826
ENSMUSG00000031700	Gpt2	85492576	85527560	48.52	protein_coding	glutamic pyruvate transaminase (alanine aminotransferase) 2	720.286	0.586765	0.0737152	7.9599	1.72181e-15	1.68233e-12		1.50188	34984
ENSMUSG00000027350	Chgb	132781278	132795079	44.61	protein_coding	chromogranin B	9083.62	0.586608	0.145172	4.04078	5.32739e-05	0.00177995		1.50171	13801
ENSMUSG00000059208	Hnrnpm	33646233	33686860	41.01	protein_coding	heterogeneous nuclear ribonucleoprotein M	876.498	0.58628	0.159912	3.66627	0.000246113	0.00546618		1.50137	40627
ENSMUSG00000043259	Fam13c	70440668	70558731	44.69	protein_coding	family with sequence similarity 13, member C	651.615	0.5861	0.087546	6.69477	2.16013e-11	9.26214e-09		1.50118	118063
ENSMUSG00000005483	Dnajb1	83608175	83611902	53.33	protein_coding	DnaJ (Hsp40) homolog, subfamily B, member 1	619.59	0.583057	0.138797	4.2008	2.65972e-05	0.00101875		1.49802	3727
ENSMUSG00000048458	Fam212b	105704599	105720842	49.26	protein_coding	family with sequence similarity 212, member B	1076.47	0.579195	0.133108	4.35131	1.35328e-05	0.00063493		1.49402	16243
ENSMUSG00000043969	Emx2	59458372	59465357	52.05	protein_coding	empty spiracles homeobox 2	90.5607	0.578462	0.151785	3.81106	0.00013837	0.00365732		1.49326	6985
ENSMUSG00000022114	Spry2	105891949	105896819	48.53	protein_coding	sprouty homolog 2 (Drosophila)	354.665	0.577652	0.134352	4.29956	1.71138e-05	0.000742045		1.49242	4870
ENSMUSG00000049327	Setd8	124439930	124462308	50.11	protein_coding	SET domain containing (lysine methyltransferase) 8	670.362	0.574824	0.110779	5.18894	2.11491e-07	2.2208e-05		1.4895	22378
ENSMUSG00000049649	Gpr3	133209340	133212536	56.43	protein_coding	G-protein coupled receptor 3	108.678	0.571894	0.151399	3.7774	0.000158473	0.00404998		1.48647	3196
ENSMUSG00000060862	Zbtb40	136979732	137048801	48.39	protein_coding	zinc finger and BTB domain containing 40	151.37	0.567648	0.140706	4.03429	5.47673e-05	0.00181942		1.48211	69069
ENSMUSG00000018906	P4ha2	54100095	54131665	49.82	protein_coding	procollagen-proline, 2-oxoglutarate 4-dioxygenase (proline 4-hydroxylase), alpha II polypeptide	143.282	0.565167	0.145136	3.89406	9.85799e-05	0.00287652		1.47956	31570
ENSMUSG00000020680	Taf15	83473086	83506743	37.89	protein_coding	TAF15 RNA polymerase II, TATA box binding protein (TBP)-associated factor	341.574	0.564894	0.160456	3.52055	0.000430656	0.00829914		1.47928	33657
ENSMUSG00000028820	Sfpq	127021324	127037013	41.15	protein_coding	splicing factor proline/glutamine rich (polypyrimidine tract binding protein associated)	2498.41	0.564232	0.106704	5.28783	1.23778e-07	1.46972e-05		1.4786	15689
ENSMUSG00000032575	Manf	106838312	106891979	43.69	protein_coding	mesencephalic astrocyte-derived neurotrophic factor	374.996	0.563801	0.0945337	5.96402	2.46108e-09	5.20401e-07		1.47816	53667
ENSMUSG00000031431	Tsc22d3	140539528	140600659	43.57	protein_coding	TSC22 domain family, member 3	1286.38	0.563673	0.131515	4.28601	1.81914e-05	0.00076386		1.47803	61131
ENSMUSG00000022678	Nde1	14163275	14192928	45.8	protein_coding	nuclear distribution gene E homolog 1 (A nidulans)	132.814	0.561345	0.126185	4.44858	8.6438e-06	0.000456937		1.47564	29653
ENSMUSG00000034832	Tet3	83362373	83459084	49.16	protein_coding	tet methylcytosine dioxygenase 3	1043.39	0.560443	0.135862	4.12508	3.70601e-05	0.00134286		1.47472	96711
ENSMUSG00000035007	Rundc1	101425085	101435673	47.57	protein_coding	RUN domain containing 1	237.23	0.558197	0.146092	3.82085	0.000132991	0.00356397		1.47243	10588
ENSMUSG00000038894	Irs2	10986980	11008458	49.77	protein_coding	insulin receptor substrate 2	560.38	0.55803	0.123878	4.50469	6.64694e-06	0.000381468		1.47226	21478
ENSMUSG00000074575	Kcng1	168260117	168281736	52.33	protein_coding	potassium voltage-gated channel, subfamily G, member 1	366.776	0.556453	0.162671	3.42072	0.000624557	0.0108566		1.47065	21619
ENSMUSG00000090877	Hspa1b	34956436	34959238	58.12	protein_coding	heat shock protein 1B	174.685	0.555584	0.169615	3.27556	0.00105453	0.0154438		1.46976	2802
ENSMUSG00000020571	Pdia6	17266545	17284770	45.33	protein_coding	protein disulfide isomerase associated 6	1791.51	0.555532	0.0751659	7.39075	1.46005e-13	9.39058e-11		1.46971	18225
ENSMUSG00000021277	Traf3	111166370	111267153	46.16	protein_coding	TNF receptor-associated factor 3	768.14	0.55515	0.0869536	6.38443	1.72033e-10	5.20688e-08		1.46932	100783
ENSMUSG00000022054	Nefm	68082590	68124846	43.31	protein_coding	neurofilament, medium polypeptide	1672.13	0.555024	0.168348	3.29688	0.000977645	0.0146464		1.46919	42256
ENSMUSG00000025408	Ddit3	127290774	127296288	48.81	protein_coding	DNA-damage inducible transcript 3	199.934	0.554412	0.113448	4.8869	1.02434e-06	8.06719e-05		1.46857	5514
ENSMUSG00000004980	Hnrnpa2b1	51460434	51469894	38.25	protein_coding	heterogeneous nuclear ribonucleoprotein A2/B1	2924.88	0.554195	0.150855	3.6737	0.000239067	0.00539508		1.46835	9460
ENSMUSG00000027881	Prpf38b	108902667	108911727	41.71	protein_coding	PRP38 pre-mRNA processing factor 38 (yeast) domain containing B	592.529	0.552854	0.149669	3.69385	0.000220888	0.00513498		1.46698	9060
ENSMUSG00000014164	Klhl3	58004221	58113592	48	protein_coding	kelch-like 3	576.179	0.550987	0.0842489	6.53999	6.15237e-11	2.3742e-08		1.46509	109371
ENSMUSG00000028676	Srsf10	135855747	135869908	39.08	protein_coding	serine/arginine-rich splicing factor 10	966.508	0.550449	0.0847642	6.49388	8.3652e-11	2.93466e-08		1.46454	14161
ENSMUSG00000070436	Serpinh1	99345375	99353230	53.79	protein_coding	serine (or cysteine) peptidase inhibitor, clade H, member 1	227.235	0.548277	0.12585	4.35658	1.32111e-05	0.000627332		1.46234	7855
ENSMUSG00000078235	Fam43b	138394092	138396528	64.3	protein_coding	family with sequence similarity 43, member B	125.671	0.545539	0.121252	4.49923	6.81991e-06	0.00038703		1.45957	2436
ENSMUSG00000020288	Ahsa2	23487882	23498030	44.53	protein_coding	AHA1, activator of heat shock protein ATPase 2	411.021	0.545481	0.0889965	6.12924	8.82972e-10	2.23435e-07		1.45951	10148
ENSMUSG00000030138	Bms1	118383383	118419417	42.95	protein_coding	BMS1 homolog, ribosome assembly protein (yeast)	740.99	0.542701	0.122107	4.44446	8.8111e-06	0.000464191		1.4567	36034
ENSMUSG00000040599	Mis12	71019611	71027371	41.79	protein_coding	MIS12 homolog (yeast)	347.39	0.54234	0.115397	4.69976	2.60469e-06	0.000177903		1.45633	7760
ENSMUSG00000020053	Igf1	87858265	87937042	41.03	protein_coding	insulin-like growth factor 1	186.509	0.541876	0.102602	5.28134	1.28241e-07	1.48836e-05		1.45586	78777
ENSMUSG00000071054	Safb	56584825	56606294	50.8	protein_coding	scaffold attachment factor B	1462.31	0.53956	0.147053	3.66915	0.000243358	0.00545005		1.45353	21469
ENSMUSG00000040565	Btaf1	36926079	37012752	38.89	protein_coding	BTAF1 RNA polymerase II, B-TFIID transcription factor-associated, (Mot1 homolog, S. cerevisiae)	1383.32	0.538303	0.0924869	5.82032	5.87362e-09	1.05514e-06		1.45226	86673
ENSMUSG00000052397	Ezr	6738041	6782784	49.01	protein_coding	ezrin	953.727	0.537269	0.117712	4.56427	5.01241e-06	0.00030703		1.45122	44743
ENSMUSG00000084616	Gm25047	36363899	36364002	35.58	snRNA	predicted gene, 25047	28.5275	0.535896	0.171519	3.12441	0.0017816	0.0224864		1.44984	103
ENSMUSG00000034459	Ifit1	34640871	34650009	42.91	protein_coding	interferon-induced protein with tetratricopeptide repeats 1	49.8833	0.533562	0.161633	3.30108	0.000963141	0.014506		1.4475	9138
ENSMUSG00000016624	Phf21b	84785381	84856049	51.24	protein_coding	PHD finger protein 21B	155.002	0.533176	0.159744	3.33769	0.00084478	0.0132655		1.44711	70668
ENSMUSG00000007721	Ccdc124	70868227	70873490	55.41	protein_coding	coiled-coil domain containing 124	423.891	0.531494	0.107601	4.93951	7.83175e-07	6.53464e-05		1.44543	5263
ENSMUSG00000022443	Myh9	77760587	77842175	52.06	protein_coding	myosin, heavy polypeptide 9, non-muscle	1818.55	0.530253	0.119499	4.43729	9.10991e-06	0.000473434		1.44418	81588
ENSMUSG00000000489	Pdgfb	79995900	80014808	55.41	protein_coding	platelet derived growth factor, B polypeptide	214.075	0.529898	0.125291	4.22934	2.34382e-05	0.000918386		1.44383	18908
ENSMUSG00000095217	Hist1h2bn	21754123	21754503	62.73	protein_coding	histone cluster 1, H2bn	30.1226	0.529	0.167137	3.16506	0.00155052	0.0203346		1.44293	380
ENSMUSG00000030983	Bccip	133709333	133721145	47.74	protein_coding	BRCA2 and CDKN1A interacting protein	392.62	0.528953	0.13691	3.8635	0.000111773	0.00316575		1.44288	11812
ENSMUSG00000078427	Sarnp	128821771	128877638	40.44	protein_coding	SAP domain containing ribonucleoprotein	521.171	0.525064	0.122344	4.29169	1.77317e-05	0.00075813		1.439	55867
ENSMUSG00000028410	Dnaja1	40722150	40737149	41.72	protein_coding	DnaJ (Hsp40) homolog, subfamily A, member 1	2518.51	0.524659	0.0965197	5.43577	5.45602e-08	7.32341e-06		1.43859	14999
ENSMUSG00000064141	Zfp69	120930137	120951699	45.57	protein_coding	zinc finger protein 69	20.2075	0.521049	0.17466	2.98322	0.00285228	0.0307887		1.435	21562
ENSMUSG00000057637	Prdm2	143107391	143212995	44.5	protein_coding	PR domain containing 2, with ZNF domain	1228.46	0.517966	0.0767619	6.74769	1.50221e-11	6.62518e-09		1.43193	105604
ENSMUSG00000079470	Utp14b	78658038	78671512	43.61	protein_coding	UTP14, U3 small nucleolar ribonucleoprotein, homolog B (yeast)	650.427	0.517252	0.126044	4.10373	4.06549e-05	0.0014295		1.43123	13474
ENSMUSG00000040055	Gjb6	57123303	57133611	45.69	protein_coding	gap junction protein, beta 6	624.23	0.516637	0.0983673	5.25212	1.50355e-07	1.69407e-05		1.43062	10308
ENSMUSG00000008845	Cd163	124304651	124330527	41.48	protein_coding	CD163 antigen	50.4751	0.516331	0.171629	3.00842	0.00262612	0.0292685		1.43031	25876
ENSMUSG00000082908	Gm13736	87526145	87526397	49.01	processed_pseudogene	predicted gene 13736	368.83	0.516103	0.123871	4.16647	3.09353e-05	0.00115342		1.43009	252
ENSMUSG00000024427	Spry4	38586268	38601268	49.7	protein_coding	sprouty homolog 4 (Drosophila)	124.849	0.515436	0.145308	3.5472	0.000389346	0.00769518		1.42943	15000
ENSMUSG00000020387	Jade2	51813455	51857653	52.19	protein_coding	jade family PHD finger 2	770.349	0.514376	0.111976	4.59364	4.35576e-06	0.000271111		1.42838	44198
ENSMUSG00000072082	Ccnf	24223232	24251409	48.42	protein_coding	cyclin F	50.8351	0.513931	0.134274	3.82748	0.000129463	0.0035098		1.42794	28177
ENSMUSG00000035095	Fam167a	63436394	63465498	49.9	protein_coding	family with sequence similarity 167, member A	15.9047	0.513915	0.17529	2.93179	0.00337009	0.0349602		1.42792	29104
ENSMUSG00000031822	Gse1	120230536	120581390	54.41	protein_coding	genetic suppressor element 1	659.623	0.513844	0.123525	4.15984	3.18475e-05	0.00118457		1.42785	350854
ENSMUSG00000032285	Dnaja4	54698873	54716315	48.97	protein_coding	DnaJ (Hsp40) homolog, subfamily A, member 4	803.255	0.509316	0.0853801	5.96527	2.44225e-09	5.20401e-07		1.42337	17442
ENSMUSG00000036450	Hif1an	44562850	44576274	48.31	protein_coding	hypoxia-inducible factor 1, alpha subunit inhibitor	289.779	0.508616	0.116787	4.35506	1.33029e-05	0.000627332		1.42269	13424
ENSMUSG00000087298	Gm9392	46820864	46821417	39.71	processed_pseudogene	predicted pseudogene 9392	15.1732	0.50799	0.177222	2.86641	0.00415157	0.0404783		1.42207	553
ENSMUSG00000060733	Ipmk	71347763	71433327	45.31	protein_coding	inositol polyphosphate multikinase	681.751	0.506684	0.0612838	8.26782	1.36426e-16	1.75489e-13		1.42078	85564
ENSMUSG00000022247	Brix1	10474779	10485947	40.33	protein_coding	BRX1, biogenesis of ribosomes, homolog (S. cerevisiae)	268.159	0.503804	0.139878	3.60175	0.000316083	0.00660224		1.41795	11168
ENSMUSG00000040761	Spen	141467890	141538597	48.61	protein_coding	SPEN homolog, transcriptional regulator (Drosophila)	1722.28	0.502892	0.104327	4.82036	1.43301e-06	0.000105837		1.41705	70707
ENSMUSG00000044583	Tlr7	167304929	167330558	39.78	protein_coding	toll-like receptor 7	42.9069	0.502233	0.151892	3.30651	0.00094467	0.0143382		1.4164	25629
ENSMUSG00000033316	Galnt9	110544345	110621382	49.06	protein_coding	UDP-N-acetyl-alpha-D-galactosamine:polypeptide N-acetylgalactosaminyltransferase 9	764.817	0.501431	0.132504	3.78429	0.00015415	0.00397238		1.41562	77037
ENSMUSG00000027248	Pdia3	121413775	121438687	41.69	protein_coding	protein disulfide isomerase associated 3	2204.11	0.501424	0.089602	5.59613	2.19192e-08	3.38344e-06		1.41561	24912
ENSMUSG00000071659	Hnrnpul2	8819401	8834142	44.64	protein_coding	heterogeneous nuclear ribonucleoprotein U-like 2	3740.12	0.500376	0.129603	3.86083	0.000113002	0.00317147		1.41458	14741
ENSMUSG00000021587	Pcsk1	75089826	75132498	38.6	protein_coding	proprotein convertase subtilisin/kexin type 1	1025.82	0.500269	0.127035	3.93803	8.21537e-05	0.00251612		1.41448	42672
ENSMUSG00000043241	Upf2	5951469	6056703	39.1	protein_coding	UPF2 regulator of nonsense transcripts homolog (yeast)	1186.62	0.499648	0.115538	4.32455	1.52843e-05	0.000692168		1.41387	105234
ENSMUSG00000039633	Lonrf1	36216064	36249516	45.98	protein_coding	LON peptidase N-terminal domain and ring finger 1	249.163	0.497123	0.110157	4.51286	6.39595e-06	0.000371158		1.4114	33452
ENSMUSG00000017418	Arl5b	15049395	15082456	39.9	protein_coding	ADP-ribosylation factor-like 5B	597.613	0.496896	0.0982289	5.05856	4.22439e-07	3.79115e-05		1.41117	33061
ENSMUSG00000072872	Rybp	100228566	100287441	40.21	protein_coding	RING1 and YY1 binding protein	581.679	0.496739	0.0691197	7.18664	6.64037e-13	3.49116e-10		1.41102	58875
ENSMUSG00000079184	Mphosph8	56668248	56697430	40.64	protein_coding	M-phase phosphoprotein 8	965.302	0.496019	0.0957292	5.18148	2.20131e-07	2.25053e-05		1.41032	29182
ENSMUSG00000003032	Klf4	55527143	55532466	52.76	protein_coding	Kruppel-like factor 4 (gut)	58.6464	0.495511	0.146753	3.37651	0.000734126	0.0121388		1.40982	5323
ENSMUSG00000079259	Trim71	114507133	114564369	49.42	protein_coding	tripartite motif-containing 71	23.1659	0.49518	0.178085	2.78057	0.00542628	0.0487544		1.4095	57236
ENSMUSG00000089857	Zfp882	71908608	71916354	39.6	protein_coding	zinc finger protein 882	129.011	0.494492	0.128981	3.83383	0.000126163	0.00344072		1.40882	7746
ENSMUSG00000020994	Pnn	59066919	59074017	43.33	protein_coding	pinin	1027.46	0.493907	0.160048	3.08599	0.00202877	0.0244737		1.40825	7098
ENSMUSG00000087622	Gm12290	64164573	64182171	44.48	lincRNA	predicted gene 12290	20.1919	0.493627	0.169985	2.90394	0.00368498	0.0372017		1.40798	17598
ENSMUSG00000020076	Ddx50	62616023	62651218	38.77	protein_coding	DEAD (Asp-Glu-Ala-Asp) box polypeptide 50	1011.61	0.49335	0.083246	5.92641	3.0963e-09	6.1275e-07		1.40771	35195
ENSMUSG00000032280	Tle3	61372366	61418497	52.22	protein_coding	transducin-like enhancer of split 3, homolog of Drosophila E(spl)	555.212	0.49318	0.124637	3.95694	7.59165e-05	0.00237697		1.40754	46131
ENSMUSG00000022210	Dhrs4	55478758	55490338	47.73	protein_coding	dehydrogenase/reductase (SDR family) member 4	101.429	0.492908	0.133104	3.70319	0.000212904	0.00500839		1.40728	11580
ENSMUSG00000027007	Ssfa2	79635352	79672966	41.24	protein_coding	sperm specific antigen 2	449.806	0.492688	0.126076	3.90786	9.31164e-05	0.00276889		1.40706	37614
ENSMUSG00000020483	Dynll2	87979525	87987533	50.42	protein_coding	dynein light chain LC8-type 2	2437.48	0.492638	0.139222	3.53851	0.000402398	0.00789252		1.40702	8008
ENSMUSG00000050017	Pitpnb	111330763	111388359	45.33	protein_coding	phosphatidylinositol transfer protein, beta	371.415	0.492559	0.111378	4.4224	9.76119e-06	0.000497273		1.40694	57596
ENSMUSG00000039680	Mrps6	92058270	92112227	43.77	protein_coding	mitochondrial ribosomal protein S6	168.498	0.491357	0.113788	4.31818	1.57322e-05	0.0007045		1.40577	53957
ENSMUSG00000026796	Fam129b	32876114	32925254	53.18	protein_coding	family with sequence similarity 129, member B	322.074	0.490835	0.131103	3.7439	0.000181185	0.00442528		1.40526	49140
ENSMUSG00000052229	Gpr17	31942997	31949636	52.88	protein_coding	G protein-coupled receptor 17	671.164	0.490484	0.107014	4.58338	4.57522e-06	0.000281367		1.40492	6639
ENSMUSG00000027424	Mgme1	144270663	144281227	45.13	protein_coding	mitochondrial genome maintainance exonuclease 1	71.6611	0.489929	0.131854	3.71568	0.000202654	0.00482742		1.40438	10564
ENSMUSG00000023905	Tnfrsf12a	23675447	23677449	57.46	protein_coding	tumor necrosis factor receptor superfamily, member 12a	44.5984	0.489373	0.164938	2.96702	0.00300704	0.0319894		1.40383	2002
ENSMUSG00000067367	Lyar	38220470	38234306	46.98	protein_coding	Ly1 antibody reactive clone	171.425	0.488695	0.138379	3.53156	0.000413117	0.00802123		1.40317	13836
ENSMUSG00000001249	Hpn	31098725	31115290	51.94	protein_coding	hepsin	8.15875	0.488082	0.177189	2.75458	0.0058768	0.0513381		1.40258	16565
ENSMUSG00000060373	Hnrnpc	52073380	52104028	38.92	protein_coding	heterogeneous nuclear ribonucleoprotein C	2165.51	0.48749	0.0676267	7.20855	5.65512e-13	3.23305e-10		1.402	30648
ENSMUSG00000042473	Tbc1d8b	139684996	139753405	37.05	protein_coding	TBC1 domain family, member 8B	96.3277	0.484303	0.141594	3.42036	0.000625381	0.0108587		1.39891	68409
ENSMUSG00000021982	Cdadc1	59560896	59597836	42.42	protein_coding	cytidine and dCMP deaminase domain containing 1	491.301	0.484043	0.146301	3.30855	0.000937813	0.014268		1.39866	36940
ENSMUSG00000028069	Gpatch4	88043108	88055993	45.95	protein_coding	G patch domain containing 4	225.1	0.48294	0.149558	3.22911	0.00124176	0.0172217		1.39759	12885
ENSMUSG00000029290	Zfp326	105876565	105915818	38.97	protein_coding	zinc finger protein 326	374.194	0.482675	0.133774	3.60814	0.000308403	0.00650343		1.39733	39253
ENSMUSG00000062563	Cys1	24665838	24681813	49.04	protein_coding	cystin 1	47.8269	0.481837	0.148394	3.24701	0.00116624	0.0164855		1.39652	15975
ENSMUSG00000019794	Katna1	7726000	7763150	42.67	protein_coding	katanin p60 (ATPase-containing) subunit A1	130.988	0.481732	0.10971	4.39097	1.12845e-05	0.000553598		1.39642	37150
ENSMUSG00000023072	Cep89	35397035	35438689	47.3	protein_coding	centrosomal protein 89	111.072	0.481442	0.108917	4.42026	9.85831e-06	0.000500569		1.39614	41654
ENSMUSG00000042978	Sbk1	126272619	126294999	53.68	protein_coding	SH3-binding kinase 1	648.406	0.480883	0.0977431	4.91987	8.66038e-07	7.03588e-05		1.3956	22380
ENSMUSG00000079043	Fastkd5	130613840	130630027	43.5	protein_coding	FAST kinase domains 5	46.804	0.480648	0.143167	3.35725	0.000787214	0.0127507		1.39537	16187
ENSMUSG00000045427	Hnrnph2	134601179	134607060	40.58	protein_coding	heterogeneous nuclear ribonucleoprotein H2	1586.38	0.478982	0.140443	3.4105	0.000648429	0.0110598		1.39376	5881
ENSMUSG00000029648	Flt1	147561604	147726011	46.17	protein_coding	FMS-like tyrosine kinase 1	637.67	0.478895	0.106731	4.48695	7.22503e-06	0.000399733		1.39368	164407
ENSMUSG00000020184	Mdm2	117688888	117710758	42.59	protein_coding	transformed mouse 3T3 cell double minute 2	650.161	0.478886	0.0995206	4.81193	1.49481e-06	0.000109876		1.39367	21870
ENSMUSG00000083899	Gm12346	77293444	77295898	43.42	transcribed_processed_pseudogene	predicted gene 12346	30.4337	0.478853	0.173791	2.75534	0.00586306	0.051276		1.39364	2454
ENSMUSG00000021431	Snrnp48	38204939	38227663	41.95	protein_coding	small nuclear ribonucleoprotein 48 (U11/U12)	196.496	0.478782	0.112139	4.26954	1.95878e-05	0.000804141		1.39357	22724
ENSMUSG00000020641	Rsad2	26442753	26456452	43.51	protein_coding	radical S-adenosyl methionine domain containing 2	13.0489	0.478687	0.176338	2.7146	0.00663568	0.0553069		1.39348	13699
ENSMUSG00000040078	Gm9769	85843980	85844459	38.75	processed_pseudogene	predicted pseudogene 9769	22.6474	0.477329	0.163031	2.92784	0.0034133	0.0352662		1.39216	479
ENSMUSG00000064343	mt-Tq	3772	3842	36.62	Mt_tRNA	mitochondrially encoded tRNA glutamine	88.7784	0.477312	0.168782	2.82798	0.00468427	0.0439819		1.39215	70
ENSMUSG00000024817	Uhrf2	30030513	30093722	39.14	protein_coding	ubiquitin-like, containing PHD and RING finger domains 2	880.559	0.475379	0.0646321	7.35515	1.9071e-13	1.17752e-10		1.39028	63209
ENSMUSG00000014039	Prdm15	97791467	97851850	47.08	protein_coding	PR domain containing 15	299.898	0.474156	0.0867546	5.46548	4.61646e-08	6.47816e-06		1.3891	60383
ENSMUSG00000024793	Tnfrsf25	152115934	152120119	57.26	protein_coding	tumor necrosis factor receptor superfamily, member 25	26.7844	0.473912	0.178311	2.65779	0.00786558	0.062119		1.38887	4185
ENSMUSG00000054302	Eapp	54670340	54695897	42.48	protein_coding	E2F-associated phosphoprotein	879.831	0.472515	0.114987	4.10928	3.96894e-05	0.00140515		1.38753	25557
ENSMUSG00000033955	Tnks1bp1	85048022	85073048	53.22	protein_coding	tankyrase 1 binding protein 1	1063.66	0.471767	0.100368	4.70036	2.59708e-06	0.000177903		1.38681	25026
ENSMUSG00000034271	Jdp2	85599105	85639878	50.33	protein_coding	Jun dimerization protein 2	295.076	0.471373	0.15385	3.06385	0.00218512	0.0258266		1.38643	40773
ENSMUSG00000032475	Nck1	100492293	100546134	38.26	protein_coding	non-catalytic region of tyrosine kinase adaptor protein 1	297.885	0.470935	0.104998	4.48517	7.28562e-06	0.000401646		1.38601	53841
ENSMUSG00000102796	RP23-335B9.5	132104830	132109363	48.13	TEC		88.0612	0.469971	0.150551	3.12167	0.00179826	0.0226595		1.38508	4533
ENSMUSG00000022237	Ankrd33b	31291479	31367759	47.65	protein_coding	ankyrin repeat domain 33B	1686.7	0.468561	0.131665	3.55874	0.000372641	0.00752067		1.38373	76280
ENSMUSG00000055044	Pdlim1	40221173	40271842	44.55	protein_coding	PDZ and LIM domain 1 (elfin)	51.6374	0.468031	0.156393	2.99266	0.00276557	0.0302793		1.38322	50669
ENSMUSG00000028771	Ptpn12	20986645	21055911	39.77	protein_coding	protein tyrosine phosphatase, non-receptor type 12	382.535	0.46743	0.107726	4.33905	1.43101e-05	0.00066135		1.38264	69266
ENSMUSG00000040738	Ints8	11199158	11254258	39.66	protein_coding	integrator complex subunit 8	445.149	0.466864	0.0856298	5.45212	4.9774e-08	6.85992e-06		1.3821	55100
ENSMUSG00000026127	Imp4	34439851	34449356	46.81	protein_coding	IMP4, U3 small nucleolar ribonucleoprotein, homolog (yeast)	263.45	0.465071	0.0785723	5.91902	3.23861e-09	6.328e-07		1.38039	9505
ENSMUSG00000025980	Hspd1	55077835	55088243	43.88	protein_coding	heat shock protein 1 (chaperonin)	2565.08	0.464575	0.0975961	4.76018	1.93424e-06	0.000136958		1.37991	10408
ENSMUSG00000025290	Rps24	24490681	24496146	45.43	protein_coding	ribosomal protein S24	2786.77	0.463706	0.124921	3.712	0.000205629	0.00487625		1.37908	5465
ENSMUSG00000040170	Fmo2	162874317	162898726	41.56	protein_coding	flavin containing monooxygenase 2	20.0997	0.463482	0.177034	2.61805	0.00884351	0.067545		1.37887	24409
ENSMUSG00000024726	2410127L17Rik	18670780	18704788	39.71	protein_coding	RIKEN cDNA 2410127L17 gene	64.2004	0.463209	0.128726	3.59842	0.000320156	0.00666028		1.3786	34008
ENSMUSG00000023805	Synj2	5941280	6044290	48.04	protein_coding	synaptojanin 2	1656.43	0.46301	0.118374	3.91143	9.17529e-05	0.00275009		1.37841	103010
ENSMUSG00000071072	Ptges3	128058954	128077272	42.5	protein_coding	prostaglandin E synthase 3 (cytosolic)	1712.16	0.462581	0.0790288	5.85332	4.81855e-09	8.96134e-07		1.378	18318
ENSMUSG00000039067	Psmd7	107580381	107588482	48.58	protein_coding	proteasome (prosome, macropain) 26S subunit, non-ATPase, 7	789.718	0.462432	0.135478	3.41333	0.000641753	0.0109789		1.37786	8101
ENSMUSG00000030717	Nupr1	126623249	126630861	47.46	protein_coding	nuclear protein transcription regulator 1	115.963	0.462367	0.161316	2.86623	0.00415399	0.0404783		1.3778	7612
ENSMUSG00000015656	Hspa8	40800984	40805200	49.51	protein_coding	heat shock protein 8	21703.2	0.462346	0.0580958	7.95833	1.7438e-15	1.68233e-12		1.37778	4216
ENSMUSG00000027091	Zc3h15	83644435	83664622	39.19	protein_coding	zinc finger CCCH-type containing 15	1740.01	0.458836	0.0879256	5.21846	1.8042e-07	1.94753e-05		1.37443	20187
ENSMUSG00000037958	Ccdc55	77044292	77078435	39.41	protein_coding	coiled-coil domain containing 55	430.142	0.458159	0.148305	3.0893	0.00200632	0.0242898		1.37379	34143
ENSMUSG00000046434	Hnrnpa1	103240432	103244955	42.9	protein_coding	heterogeneous nuclear ribonucleoprotein A1	1207.84	0.45799	0.148134	3.09172	0.00199001	0.0241873		1.37363	4523
ENSMUSG00000045404	Kcnk13	99964499	100062682	44.47	protein_coding	potassium channel, subfamily K, member 13	62.5206	0.457518	0.150777	3.0344	0.00241017	0.0275785		1.37318	98183
ENSMUSG00000020993	Trappc6b	59043093	59061461	43.13	protein_coding	trafficking protein particle complex 6B	454.642	0.457247	0.149881	3.05073	0.00228287	0.026595		1.37292	18368
ENSMUSG00000014195	Dnajc7	100582818	100620168	45.63	protein_coding	DnaJ (Hsp40) homolog, subfamily C, member 7	1354.79	0.456443	0.135686	3.36397	0.000768303	0.0125235		1.37216	37350
ENSMUSG00000030247	Kcnj8	142564939	142571356	44.89	protein_coding	potassium inwardly-rectifying channel, subfamily J, member 8	23.5109	0.456098	0.163394	2.7914	0.00524813	0.0477502		1.37183	6417
ENSMUSG00000057329	Bcl2	106538178	106714274	42.96	protein_coding	B cell leukemia/lymphoma 2	454.156	0.45596	0.0938919	4.85623	1.19643e-06	9.23408e-05		1.3717	176096
ENSMUSG00000050714	Zbtb26	37432168	37443121	38.86	protein_coding	zinc finger and BTB domain containing 26	222.254	0.455289	0.0973644	4.67614	2.92329e-06	0.000195342		1.37106	10953
ENSMUSG00000039634	Zfp189	49521176	49531517	41.24	protein_coding	zinc finger protein 189	287.365	0.454292	0.151199	3.0046	0.00265933	0.0295532		1.37011	10341
ENSMUSG00000050619	Zscan29	121158273	121171125	43.3	protein_coding	zinc finger SCAN domains 29	94.7374	0.453642	0.110214	4.11602	3.8547e-05	0.00137734		1.36949	12852
ENSMUSG00000020923	Ubtf	102304560	102319742	57.78	protein_coding	upstream binding transcription factor, RNA polymerase I	1960.77	0.453507	0.0950132	4.77309	1.81418e-06	0.000130858		1.36936	15182
ENSMUSG00000083674	Zfp133-ps	144459280	144500267	43.92	unitary_pseudogene	zinc finger protein 133, pseudogene	19.3193	0.453405	0.170397	2.66087	0.00779379	0.0617265		1.36927	40987
ENSMUSG00000034165	Ccnd3	47505051	47599691	48.05	protein_coding	cyclin D3	136.688	0.453115	0.105112	4.31079	1.62672e-05	0.000725722		1.36899	94640
ENSMUSG00000024966	Stip1	7020696	7040026	45.97	protein_coding	stress-induced phosphoprotein 1	2836.5	0.452489	0.0730564	6.19369	5.87715e-10	1.53762e-07		1.3684	19330
ENSMUSG00000044933	Sstr3	78537015	78544345	55.63	protein_coding	somatostatin receptor 3	373.68	0.451054	0.109499	4.11924	3.80127e-05	0.00136774		1.36704	7330
ENSMUSG00000029062	Cdk11b	155624854	155649938	44.18	protein_coding	cyclin-dependent kinase 11B	807.496	0.451037	0.107441	4.198	2.69281e-05	0.00102887		1.36702	25084
ENSMUSG00000054893	Zfp667	6286579	6307883	44.67	protein_coding	zinc finger protein 667	328.752	0.450269	0.122296	3.68181	0.000231581	0.0053037		1.3663	21304
ENSMUSG00000020441	2310033P09Rik	59208321	59210738	56.33	protein_coding	RIKEN cDNA 2310033P09 gene	84.1999	0.450028	0.15595	2.88571	0.00390527	0.0387166		1.36607	2417
ENSMUSG00000039671	Zmynd8	165784152	165899016	50.42	protein_coding	zinc finger, MYND-type containing 8	1431.14	0.449778	0.10647	4.22445	2.39522e-05	0.000933652		1.36583	114864
ENSMUSG00000039804	Ncoa5	165000357	165034867	44.28	protein_coding	nuclear receptor coactivator 5	498.871	0.449244	0.0789614	5.68941	1.27477e-08	2.10333e-06		1.36532	34510
ENSMUSG00000037868	Egr2	67535475	67542188	55.81	protein_coding	early growth response 2	239.889	0.449149	0.176714	2.54168	0.0110322	0.0777449		1.36524	6713
ENSMUSG00000073705	Apitd1	149127121	149137629	50.38	protein_coding	apoptosis-inducing, TAF9-like domain 1	15.1591	0.448768	0.177227	2.53216	0.0113361	0.0789284		1.36487	10508
ENSMUSG00000030357	Fkbp4	128429735	128438677	52.96	protein_coding	FK506 binding protein 4	1226.12	0.447453	0.101909	4.39073	1.12972e-05	0.000553598		1.36363	8942
ENSMUSG00000029306	Ibsp	104299171	104311469	40.65	protein_coding	integrin binding sialoprotein	10.7368	0.447403	0.175366	2.55124	0.0107339	0.0763764		1.36358	12298
ENSMUSG00000034292	Traf3ip1	91494647	91529307	47.88	protein_coding	TRAF3 interacting protein 1	281.379	0.447361	0.124751	3.58603	0.000335751	0.00693796		1.36354	34660
ENSMUSG00000035048	Anapc13	102626296	102634425	47.61	protein_coding	anaphase promoting complex subunit 13	246.119	0.446575	0.155548	2.87098	0.00409201	0.0399774		1.3628	8129
ENSMUSG00000026773	Pfkfb3	11471433	11554077	47.33	protein_coding	6-phosphofructo-2-kinase/fructose-2,6-biphosphatase 3	222.685	0.446455	0.146518	3.04709	0.00231069	0.0267977		1.36269	82644
ENSMUSG00000019774	Mtrf1l	5811887	5823910	42.89	protein_coding	mitochondrial translational release factor 1-like	77.7311	0.443039	0.124704	3.55274	0.000381246	0.00763582		1.35946	12023
ENSMUSG00000042608	Stk40	126103957	126141029	50.77	protein_coding	serine/threonine kinase 40	263.037	0.442806	0.130144	3.40244	0.00066786	0.0113026		1.35925	37072
ENSMUSG00000052684	Jun	95049034	95052222	55.53	protein_coding	jun proto-oncogene	947.384	0.442258	0.138339	3.19691	0.00138907	0.018825		1.35873	3188
ENSMUSG00000046865	Fbl	28169748	28179269	49.97	protein_coding	fibrillarin	113.97	0.441944	0.149645	2.95328	0.00314414	0.0331283	Cajal-Body enriched gene	1.35843	9521
ENSMUSG00000019814	Ltv1	13178640	13193137	43.83	protein_coding	LTV1 homolog (S. cerevisiae)	165.394	0.441923	0.0981916	4.50062	6.77546e-06	0.000385926		1.35841	14497
ENSMUSG00000015176	Nolc1	46075863	46085528	48.92	protein_coding	nucleolar and coiled-body phosphoprotein 1	780.803	0.441662	0.0921679	4.79193	1.65185e-06	0.000120273		1.35817	9665
ENSMUSG00000028062	Lamtor2	88549819	88553074	49.57	protein_coding	late endosomal/lysosomal adaptor, MAPK and MTOR activator 2	409.105	0.441177	0.135955	3.24502	0.00117443	0.0165708		1.35771	3255
ENSMUSG00000016239	Lonrf3	36328353	36362341	43.18	protein_coding	LON peptidase N-terminal domain and ring finger 3	109.659	0.440655	0.118176	3.72881	0.000192389	0.00464744		1.35722	33988
ENSMUSG00000032611	1700102P08Rik	108392805	108410934	45.86	protein_coding	RIKEN cDNA 1700102P08 gene	17.7367	0.440372	0.169672	2.59543	0.00944718	0.0707382		1.35695	18129
ENSMUSG00000050668	Gpatch11	78835516	78848299	44.29	protein_coding	G patch domain containing 11	604.075	0.44009	0.109321	4.02566	5.68157e-05	0.00187395		1.35669	12783
ENSMUSG00000022136	Dnajc3	118937932	118981702	43.19	protein_coding	DnaJ (Hsp40) homolog, subfamily C, member 3	1374.54	0.439906	0.0718406	6.12337	9.16195e-10	2.24482e-07		1.35652	43770
ENSMUSG00000006412	Pfdn2	171345670	171359254	44.92	protein_coding	prefoldin 2	527.115	0.439756	0.155005	2.83705	0.00455331	0.043014		1.35638	13584
ENSMUSG00000036160	Surf6	26888628	26902879	47.81	protein_coding	surfeit gene 6	317.59	0.439683	0.0840896	5.22875	1.70659e-07	1.88002e-05		1.35631	14251
ENSMUSG00000022160	Mettl3	52294668	52305128	42.87	protein_coding	methyltransferase like 3	223.739	0.439086	0.0920673	4.76918	1.84974e-06	0.000132803		1.35575	10460
ENSMUSG00000022774	Ncbp2	31948513	31961781	44.55	protein_coding	nuclear cap binding protein subunit 2	623.871	0.438939	0.123465	3.55518	0.000377725	0.00759189		1.35561	13268
ENSMUSG00000064856	Gm23444	83271498	83271688	45.55	snRNA	predicted gene, 23444	8.38	0.43855	0.176781	2.48075	0.0131107	0.087243		1.35524	190
ENSMUSG00000074482	Gm16589	4087658	4088572	42.51	processed_pseudogene	predicted gene 16589	45.079	0.437331	0.177067	2.46987	0.0135162	0.0888039		1.3541	914
ENSMUSG00000022332	Khdrbs3	68928420	69093512	43.01	protein_coding	KH domain containing, RNA binding, signal transduction associated 3	2039.38	0.436445	0.122431	3.56481	0.000364118	0.0073826		1.35327	165092
ENSMUSG00000046667	Rbm12b1	12140264	12146731	40.26	protein_coding	RNA binding motif protein 12 B1	93.4747	0.436144	0.130515	3.34171	0.00083263	0.0131233		1.35298	6467
ENSMUSG00000060477	Irak2	113638467	113695009	48.33	protein_coding	interleukin-1 receptor-associated kinase 2	198.065	0.435218	0.108848	3.99841	6.37698e-05	0.00205931		1.35211	56542
ENSMUSG00000028035	Dnajb4	152178511	152210279	39.92	protein_coding	DnaJ (Hsp40) homolog, subfamily B, member 4	1431.23	0.435024	0.0899539	4.83608	1.32424e-06	0.000101193		1.35193	31768
ENSMUSG00000088185	Scarna2	108554338	108554751	64.01	snoRNA	small Cajal body-specific RNA 2	543.016	0.434484	0.128529	3.38044	0.000723703	0.0120248	ScaRNA2	1.35143	413
ENSMUSG00000057469	E2f6	16810965	16826743	47.06	protein_coding	E2F transcription factor 6	157.097	0.433014	0.123407	3.50882	0.000450092	0.00858791		1.35005	15778
ENSMUSG00000046516	Cox17	38346991	38352763	44.64	protein_coding	cytochrome c oxidase assembly protein 17	421.641	0.432888	0.154924	2.7942	0.00520288	0.0474375		1.34993	5772
ENSMUSG00000006205	Htra1	130936111	130985660	48.47	protein_coding	HtrA serine peptidase 1	1049.47	0.432124	0.114528	3.77309	0.000161239	0.00408014		1.34922	49549
ENSMUSG00000035898	Uba6	86110720	86172803	34.68	protein_coding	ubiquitin-like modifier activating enzyme 6	613.796	0.432107	0.0622404	6.94254	3.85114e-12	1.85769e-09		1.3492	62083
ENSMUSG00000002900	Lamb1	31265234	31329644	45.81	protein_coding	laminin B1	474.232	0.432086	0.133231	3.24313	0.00118223	0.016605		1.34918	64410
ENSMUSG00000022141	Nipbl	8291225	8444463	37	protein_coding	Nipped-B homolog (Drosophila)	1858.47	0.431954	0.0740857	5.83046	5.52738e-09	1.01572e-06		1.34906	153238
ENSMUSG00000040681	Hmgn1	96120618	96127729	46.23	protein_coding	high mobility group nucleosomal binding domain 1	493.403	0.431436	0.0816673	5.28285	1.27188e-07	1.48836e-05		1.34858	7111
ENSMUSG00000024276	Zfp397	23954688	23964671	40.19	protein_coding	zinc finger protein 397	837.699	0.430778	0.067148	6.41536	1.4049e-10	4.71435e-08		1.34796	9983
ENSMUSG00000029307	Dmp1	104202617	104214102	41.92	protein_coding	dentin matrix protein 1	63.052	0.430583	0.174341	2.46978	0.0135196	0.0888039		1.34778	11485
ENSMUSG00000063889	Crem	3266048	3337748	38.63	protein_coding	cAMP responsive element modulator	220.493	0.430543	0.129152	3.33361	0.000857276	0.0134208		1.34774	71700
ENSMUSG00000090256	Alms1-ps1	85721925	85756526	40.89	unprocessed_pseudogene	Alstrom syndrome 1, pseudogene 1	9.23106	0.430208	0.178008	2.41679	0.0156581	0.0973808		1.34743	34601
ENSMUSG00000021895	Arhgef3	27238039	27403904	44.56	protein_coding	Rho guanine nucleotide exchange factor (GEF) 3	1087.76	0.430093	0.107975	3.98326	6.79768e-05	0.00217244		1.34732	165865
ENSMUSG00000041229	Phf8	151520672	151633859	39.36	protein_coding	PHD finger protein 8	480.749	0.429926	0.0671609	6.40143	1.53928e-10	4.95007e-08		1.34716	113187
ENSMUSG00000088025	Rprl3	3803069	3803358	57.24	misc_RNA	ribonuclease P RNA-like 3	31.0657	0.429015	0.152917	2.80555	0.00502314	0.0461531		1.34631	289
ENSMUSG00000037465	Klf10	38294413	38300707	51.25	protein_coding	Kruppel-like factor 10	544.798	0.428737	0.130613	3.28249	0.00102896	0.01517		1.34605	6294
ENSMUSG00000028480	Glipr2	43957401	43979118	49.83	protein_coding	GLI pathogenesis-related 2	67.5381	0.427846	0.147025	2.91002	0.00361403	0.0367498		1.34522	21717
ENSMUSG00000019505	Ubb	62551171	62553213	52.23	protein_coding	ubiquitin B	1676.37	0.427736	0.131619	3.24981	0.0011548	0.0163838		1.34512	2042
ENSMUSG00000000805	Car4	84957786	84966044	52.03	protein_coding	carbonic anhydrase 4	142.081	0.427542	0.164219	2.60349	0.00922808	0.0696551		1.34494	8258
ENSMUSG00000028578	Caap1	94500081	94556796	38.19	protein_coding	caspase activity and apoptosis inhibitor 1	118.622	0.427359	0.118008	3.62145	0.000292956	0.00623734		1.34477	56715
ENSMUSG00000024991	Eif3a	60761116	60790693	38.29	protein_coding	eukaryotic translation initiation factor 3, subunit A	3585.4	0.42733	0.128902	3.31515	0.000915929	0.014082		1.34474	29577
ENSMUSG00000020018	Snrpf	93583029	93589706	42.02	protein_coding	small nuclear ribonucleoprotein polypeptide F	103.087	0.426639	0.166791	2.55793	0.0105296	0.0755977		1.3441	6677
ENSMUSG00000025958	Creb1	64532645	64604548	38.54	protein_coding	cAMP responsive element binding protein 1	1485.38	0.42653	0.0676655	6.30351	2.90981e-10	8.31773e-08		1.344	71903
ENSMUSG00000011427	Zfp790	29816072	29832042	46.1	protein_coding	zinc finger protein 790	354.442	0.426348	0.112301	3.79648	0.000146764	0.00383475		1.34383	15970
ENSMUSG00000050953	Gja1	56377300	56390419	43.98	protein_coding	gap junction protein, alpha 1	2508.64	0.426053	0.156977	2.71411	0.00664543	0.0553583		1.34355	13119
ENSMUSG00000031568	Rwdd4a	47533664	47552955	43.45	protein_coding	RWD domain containing 4A	304.519	0.425601	0.116288	3.65988	0.000252335	0.00556882		1.34313	19291
ENSMUSG00000003814	Calr	84841850	84846934	48.79	protein_coding	calreticulin	6141.18	0.425266	0.0806415	5.27355	1.33813e-07	1.53003e-05		1.34282	5084
ENSMUSG00000079480	Pin4	102119447	102127669	44.22	protein_coding	protein (peptidyl-prolyl cis/trans isomerase) NIMA-interacting, 4 (parvulin)	272.92	0.42452	0.109721	3.8691	0.000109237	0.00311447		1.34213	8222
ENSMUSG00000053907	Mat2a	72432799	72439558	43.02	protein_coding	methionine adenosyltransferase II, alpha	441.869	0.42398	0.102957	4.11803	3.82123e-05	0.00136855		1.34162	6759
ENSMUSG00000021743	Fezf2	12341892	12345865	54.35	protein_coding	Fez family zinc finger 2	292.349	0.423821	0.161748	2.62025	0.00878656	0.0672891		1.34148	3973
ENSMUSG00000035851	Ythdc1	86804221	86836659	35.68	protein_coding	YTH domain containing 1	1314.89	0.423799	0.0943824	4.49024	7.11435e-06	0.000398093		1.34146	32438
ENSMUSG00000050919	Zfp366	99184823	99247037	45.27	protein_coding	zinc finger protein 366	27.1778	0.422392	0.173503	2.43449	0.014913	0.0945365		1.34015	62214
ENSMUSG00000036501	Fam13b	34442352	34506823	40.64	protein_coding	family with sequence similarity 13, member B	1055.45	0.422379	0.0778316	5.42683	5.73625e-08	7.63317e-06		1.34014	64471
ENSMUSG00000016559	H3f3b	116021912	116027962	44.24	protein_coding	H3 histone, family 3B	1561.95	0.42127	0.134173	3.13975	0.00169091	0.0217326		1.33911	6050
ENSMUSG00000026740	Dnajc1	18195654	18392830	38.7	protein_coding	DnaJ (Hsp40) homolog, subfamily C, member 1	683.407	0.421233	0.0911191	4.62289	3.78435e-06	0.000238429		1.33907	197176
ENSMUSG00000050271	D8Ertd82e	36094828	36147787	46.51	protein_coding	DNA segment, Chr 8, ERATO Doi 82, expressed	338.988	0.421086	0.100963	4.17068	3.03686e-05	0.00113503		1.33894	52959
ENSMUSG00000078671	Chd2	73426691	73541746	41.84	protein_coding	chromodomain helicase DNA binding protein 2	1561.86	0.421083	0.11827	3.56035	0.000370361	0.00749265		1.33893	115055
ENSMUSG00000020075	Ddx21	62580248	62602298	45.35	protein_coding	DEAD (Asp-Glu-Ala-Asp) box polypeptide 21	443.969	0.420795	0.124839	3.3707	0.000749772	0.0123122		1.33867	22050
ENSMUSG00000041180	Hectd2	36554639	36621135	37.97	protein_coding	HECT domain containing 2	330.092	0.420772	0.0970175	4.33707	1.44395e-05	0.000663357		1.33864	66496
ENSMUSG00000037035	Inhbb	119415465	119422248	58.15	protein_coding	inhibin beta-B	76.6703	0.420725	0.152277	2.7629	0.00572903	0.0507207		1.3386	6783
ENSMUSG00000033594	Spata2l	123232255	123236209	57.37	protein_coding	spermatogenesis associated 2-like	407.03	0.419944	0.111366	3.77086	0.000162685	0.00410999		1.33788	3954
ENSMUSG00000020038	Cry1	85131702	85185054	40.79	protein_coding	cryptochrome 1 (photolyase-like)	238.248	0.419049	0.128061	3.27226	0.00106691	0.0155366		1.33705	53352
ENSMUSG00000025209	Peo1	45006558	45012762	50.62	protein_coding	progressive external ophthalmoplegia 1 (human)	131.237	0.418978	0.105139	3.98499	6.74843e-05	0.00216118		1.33698	6204
ENSMUSG00000014226	Cacybp	160202367	160212875	40.82	protein_coding	calcyclin binding protein	1642.1	0.418763	0.0922588	4.539	5.6521e-06	0.000339478		1.33678	10508
ENSMUSG00000026360	Rgs2	143999338	144004161	43.62	protein_coding	regulator of G-protein signaling 2	792.779	0.418298	0.10812	3.86883	0.000109357	0.00311447		1.33635	4823
ENSMUSG00000024097	Srsf7	80200089	80207305	41.78	protein_coding	serine/arginine-rich splicing factor 7	793.575	0.41815	0.0922664	4.53199	5.84308e-06	0.000348239		1.33621	7216
ENSMUSG00000042541	Shfm1	6557294	6578658	37.61	protein_coding	split hand/foot malformation (ectrodactyly) type 1	1208.46	0.41776	0.118359	3.52961	0.000416176	0.00805025		1.33585	21364
ENSMUSG00000038762	Abcf1	35956819	35969761	50.96	protein_coding	ATP-binding cassette, sub-family F (GCN20), member 1	1217.67	0.41764	0.119632	3.49104	0.000481147	0.00896978		1.33574	12942
ENSMUSG00000031217	Efnb1	99136130	99148991	54.71	protein_coding	ephrin B1	184.412	0.417636	0.133486	3.12869	0.00175587	0.0222525		1.33574	12861
ENSMUSG00000030521	Mphosph10	64376576	64392268	41.91	protein_coding	M-phase phosphoprotein 10 (U3 small nucleolar ribonucleoprotein)	418.738	0.417619	0.0974458	4.28565	1.82208e-05	0.00076386		1.33572	15692
ENSMUSG00000022602	Arc	74669083	74672570	58.8	protein_coding	activity regulated cytoskeletal-associated protein	2813.5	0.417341	0.172299	2.42219	0.0154274	0.0965684		1.33546	3487
ENSMUSG00000020849	Ywhae	75732869	75765845	41.65	protein_coding	tyrosine 3-monooxygenase/tryptophan 5-monooxygenase activation protein, epsilon polypeptide	6803.55	0.417112	0.12833	3.25031	0.00115281	0.0163838		1.33525	32976
ENSMUSG00000050534	Htr5b	121509842	121528465	45.04	protein_coding	5-hydroxytryptamine (serotonin) receptor 5B	23.7143	0.416976	0.169296	2.46301	0.0137777	0.0900515		1.33513	18623
ENSMUSG00000041846	Smek1	101039409	101083702	39.5	protein_coding	SMEK homolog 1, suppressor of mek1 (Dictyostelium)	868.514	0.416442	0.0717345	5.80532	6.42423e-09	1.11448e-06		1.33463	44293
ENSMUSG00000037214	Thap1	26158212	26162940	47.54	protein_coding	THAP domain containing, apoptosis associated protein 1	61.0374	0.415673	0.132617	3.13437	0.00172221	0.0220066		1.33392	4728
ENSMUSG00000034453	Polr3b	84622437	84727177	44.2	protein_coding	polymerase (RNA) III (DNA directed) polypeptide B	362.996	0.415505	0.0860058	4.83113	1.35757e-06	0.00010284		1.33377	104740
ENSMUSG00000029392	Rilpl1	124493082	124531391	50.41	protein_coding	Rab interacting lysosomal protein-like 1	1076.37	0.414827	0.132519	3.13031	0.0017462	0.0221592		1.33314	38309
ENSMUSG00000034485	Uaca	60794548	60880370	45.32	protein_coding	uveal autoantigen with coiled-coil domains and ankyrin repeats	212.804	0.414801	0.164636	2.51951	0.0117519	0.0810192		1.33312	85822
ENSMUSG00000078515	Ddi2	141677549	141723419	45.74	protein_coding	DNA-damage inducible protein 2	912.126	0.414271	0.0815787	5.07817	3.81083e-07	3.48071e-05		1.33263	45870
ENSMUSG00000020601	Trib2	15791727	15816877	46.68	protein_coding	tribbles homolog 2 (Drosophila)	1049.26	0.413749	0.128603	3.21727	0.00129416	0.0178682		1.33214	25150
ENSMUSG00000040270	Bach2	32238804	32586108	44.15	protein_coding	BTB and CNC homology 2	141.363	0.413706	0.146203	2.82967	0.0046596	0.0438304		1.3321	347304
ENSMUSG00000037857	Nufip2	77686155	77741921	41.32	protein_coding	nuclear fragile X mental retardation protein interacting protein 2	1655.01	0.413345	0.0695983	5.93901	2.86751e-09	5.74842e-07		1.33177	55766
ENSMUSG00000044211	Gm7887	48524372	48525105	46.73	processed_pseudogene	predicted gene 7887	233.784	0.412632	0.124257	3.3208	0.000897599	0.013911		1.33111	733
ENSMUSG00000090093	Gm14399	175129493	175142012	41.36	protein_coding	predicted gene 14399	235.075	0.412593	0.164563	2.5072	0.012169	0.0831524		1.33108	12519
ENSMUSG00000062075	Lmnb2	80901203	80918245	55.65	protein_coding	lamin B2	242.481	0.412498	0.102988	4.00532	6.19346e-05	0.00201693		1.33099	17042
ENSMUSG00000037992	Rara	98927818	98974942	55.57	protein_coding	retinoic acid receptor, alpha	110.939	0.41193	0.106673	3.86161	0.000112641	0.00317147		1.33046	47124
ENSMUSG00000038095	Sbno1	124368702	124425914	41.41	protein_coding	sno, strawberry notch homolog 1 (Drosophila)	3737.02	0.411539	0.0731063	5.62932	1.8092e-08	2.82089e-06		1.3301	57212
ENSMUSG00000031585	Gtf2e2	33731833	33777173	40.61	protein_coding	general transcription factor II E, polypeptide 2 (beta subunit)	195.53	0.411536	0.0961728	4.27913	1.87625e-05	0.000777712		1.3301	45340
ENSMUSG00000046185	Zfp84	29768552	29779821	45.35	protein_coding	zinc finger protein 84	336.285	0.411074	0.0885705	4.6412	3.46388e-06	0.000225952		1.32967	11269
ENSMUSG00000020627	Klhl29	5077472	5375682	47.6	protein_coding	kelch-like 29	410.292	0.410607	0.117289	3.50082	0.000463824	0.00874547		1.32925	298210
ENSMUSG00000019960	Dusp6	99263231	99267488	47.51	protein_coding	dual specificity phosphatase 6	1098.46	0.409574	0.140394	2.91732	0.00353052	0.0361387		1.32829	4257
ENSMUSG00000017144	Rnd3	51130438	51149111	43.97	protein_coding	Rho family GTPase 3	441.713	0.409046	0.169465	2.41374	0.0157896	0.0980006		1.32781	18673
ENSMUSG00000024789	Jak2	29251828	29313080	39.41	protein_coding	Janus kinase 2	1427.29	0.408282	0.102252	3.9929	6.52704e-05	0.00209899		1.3271	61252
ENSMUSG00000029313	Aff1	103692374	103855322	45.55	protein_coding	AF4/FMR2 family, member 1	173.45	0.408203	0.09984	4.08857	4.34032e-05	0.00150895		1.32703	162948
ENSMUSG00000021037	Ahsa1	87266746	87273997	47.52	protein_coding	AHA1, activator of heat shock protein ATPase 1	1755.36	0.40794	0.065062	6.27002	3.61005e-10	9.95085e-08		1.32679	7251
ENSMUSG00000025477	Inpp5a	139389109	139579652	48.79	protein_coding	inositol polyphosphate-5-phosphatase A	286.611	0.407912	0.140722	2.89872	0.00374694	0.0375569		1.32676	190543
ENSMUSG00000014361	Mertk	128698956	128802894	44.58	protein_coding	c-mer proto-oncogene tyrosine kinase	615.158	0.407641	0.119341	3.41576	0.00063605	0.0109577		1.32652	103938
ENSMUSG00000012296	Tjap1	46257851	46283026	52.05	protein_coding	tight junction associated protein 1	65.5883	0.406646	0.143077	2.84215	0.00448103	0.0425668		1.3256	25175
ENSMUSG00000056629	Fkbp2	6977741	6980461	60.01	protein_coding	FK506 binding protein 2	731.798	0.405857	0.121118	3.35092	0.000805424	0.0128701		1.32488	2720
ENSMUSG00000015839	Nfe2l2	75675513	75704641	44.8	protein_coding	nuclear factor, erythroid derived 2, like 2	162.434	0.405577	0.107718	3.76518	0.000166431	0.00418409		1.32462	29128
ENSMUSG00000078622	Ccdc47	106197408	106216344	42.91	protein_coding	coiled-coil domain containing 47	2126.55	0.405339	0.107304	3.77747	0.000158428	0.00404998		1.3244	18936
ENSMUSG00000068184	Ndufaf2	108052590	108158625	42.21	protein_coding	NADH dehydrogenase (ubiquinone) 1 alpha subcomplex, assembly factor 2	278.182	0.404984	0.126894	3.19151	0.00141531	0.0190468		1.32407	106035
ENSMUSG00000038708	Golga4	118506318	118582522	44.28	protein_coding	golgi autoantigen, golgin subfamily a, 4	2691.84	0.404844	0.107273	3.77397	0.00016067	0.0040791		1.32395	76204
ENSMUSG00000028655	Mfsd2a	122946850	122961188	51.06	protein_coding	major facilitator superfamily domain containing 2A	257.261	0.404338	0.155712	2.59671	0.00941227	0.0705987		1.32348	14338
ENSMUSG00000066687	Zbtb16	48654311	48835945	48.33	protein_coding	zinc finger and BTB domain containing 16	1253.17	0.404068	0.146792	2.75266	0.00591133	0.0514876		1.32323	181634
ENSMUSG00000033454	Zbtb1	76370266	76396950	43.01	protein_coding	zinc finger and BTB domain containing 1	387.753	0.403531	0.0908722	4.44064	8.96918e-06	0.000469316		1.32274	26684
ENSMUSG00000026083	Eif5b	37998010	38055579	41.45	protein_coding	eukaryotic translation initiation factor 5B	1343.13	0.403237	0.121363	3.32257	0.000891917	0.0138647		1.32247	57569
ENSMUSG00000041773	Enc1	97241105	97253039	48.96	protein_coding	ectodermal-neural cortex 1	9938.06	0.402988	0.0800387	5.03492	4.78056e-07	4.21487e-05		1.32224	11934
ENSMUSG00000034275	Igsf9b	27299228	27334763	51.62	protein_coding	immunoglobulin superfamily, member 9B	368.077	0.402966	0.158811	2.53739	0.0111682	0.0782337		1.32222	35535
ENSMUSG00000030516	Tjp1	65296165	65371239	40.37	protein_coding	tight junction protein 1	2336.08	0.40277	0.0922623	4.36548	1.26842e-05	0.000609948		1.32204	75074
ENSMUSG00000024974	Smc3	53600398	53645833	41.19	protein_coding	structural maintenance of chromosomes 3	1833.77	0.402768	0.123478	3.26186	0.00110683	0.0159524		1.32204	45435
ENSMUSG00000024847	Aip	4114446	4125858	49.41	protein_coding	aryl-hydrocarbon receptor-interacting protein	162.297	0.402746	0.107961	3.73046	0.000191128	0.00462421		1.32202	11412
ENSMUSG00000023089	Ndufa5	24518666	24528013	41.04	protein_coding	NADH dehydrogenase (ubiquinone) 1 alpha subcomplex, 5	629.465	0.402703	0.123289	3.26633	0.0010895	0.0158042		1.32198	9347
ENSMUSG00000033487	Fndc3a	72537946	72710003	39.12	protein_coding	fibronectin type III domain containing 3A	1313.01	0.402203	0.0774808	5.191	2.09166e-07	2.21143e-05		1.32152	172057
ENSMUSG00000021203	Otub2	103388682	103406350	51.08	protein_coding	OTU domain, ubiquitin aldehyde binding 2	295.579	0.401532	0.126238	3.18076	0.00146891	0.0195548		1.32091	17668
ENSMUSG00000052105	Mtcl1	66336982	66449750	47.49	protein_coding	microtubule crosslinking factor 1	1147.56	0.401489	0.156833	2.55998	0.0104677	0.0754249		1.32087	112768
ENSMUSG00000008976	Gabpa	84834925	84863779	40.67	protein_coding	GA repeat binding protein, alpha	528.335	0.400804	0.0892633	4.49013	7.11801e-06	0.000398093		1.32024	28854
ENSMUSG00000025782	Taf3	9914552	10048596	42.7	protein_coding	TAF3 RNA polymerase II, TATA box binding protein (TBP)-associated factor	285.749	0.400606	0.115514	3.46803	0.000524287	0.00964587		1.32006	134044
ENSMUSG00000045498	Pcdhb3	37300799	37304585	45.29	protein_coding	protocadherin beta 3	70.0872	0.400474	0.148933	2.68895	0.00716767	0.0585088		1.31994	3786
ENSMUSG00000020074	Ccar1	62743928	62792368	40.08	protein_coding	cell division cycle and apoptosis regulator 1	1052.02	0.400348	0.0935802	4.27812	1.88476e-05	0.000777712		1.31983	48440
ENSMUSG00000000531	Grasp	101224207	101232755	55.66	protein_coding	GRP1 (general receptor for phosphoinositides 1)-associated scaffold protein	746.845	0.399872	0.153965	2.59716	0.00939984	0.070572		1.31939	8548
ENSMUSG00000060206	Zfp462	54945048	55083563	44.14	protein_coding	zinc finger protein 462	1166.03	0.399779	0.078949	5.06376	4.11057e-07	3.7324e-05		1.31931	138515
ENSMUSG00000020361	Hspa4	53259814	53300457	42.23	protein_coding	heat shock protein 4	4357.3	0.399621	0.0505992	7.89777	2.83927e-15	2.57806e-12		1.31916	40643
ENSMUSG00000048285	Frmd6	70825514	70902232	44.67	protein_coding	FERM domain containing 6	534.121	0.39959	0.157444	2.53799	0.0111492	0.078156		1.31913	76718
ENSMUSG00000051705	Senp8	59734259	59750649	38.88	protein_coding	SUMO/sentrin specific peptidase 8	98.5027	0.39935	0.125326	3.18648	0.00144016	0.0192972		1.31891	16390
ENSMUSG00000035173	Ccdc186	56787481	56822190	43.66	protein_coding	coiled-coil domain containing 186	1219.12	0.398876	0.109003	3.65931	0.000252899	0.00556882		1.31848	34709
ENSMUSG00000033107	Rnf125	20944625	20983848	43.97	protein_coding	ring finger protein 125	32.2253	0.398606	0.165465	2.40901	0.0159959	0.0988444		1.31823	39223
ENSMUSG00000037447	Arid5a	36307733	36324029	53.91	protein_coding	AT rich interactive domain 5A (MRF1-like)	122.517	0.39812	0.130061	3.06103	0.00220579	0.0259121		1.31779	16296
ENSMUSG00000003039	Fam32a	72219730	72223764	49.91	protein_coding	family with sequence similarity 32, member A	1344.47	0.397874	0.0987337	4.02977	5.58312e-05	0.00184938		1.31757	4034
ENSMUSG00000050608	Minos1	139101814	139131113	46.51	protein_coding	mitochondrial inner membrane organizing system 1	614.744	0.397651	0.121567	3.27104	0.00107155	0.0155747		1.31736	29299
ENSMUSG00000028613	Lrp8	107802261	107876840	51.32	protein_coding	low density lipoprotein receptor-related protein 8, apolipoprotein e receptor	894.627	0.397087	0.0775601	5.11973	3.05966e-07	2.93347e-05		1.31685	74579
ENSMUSG00000073676	Hspe1	55088132	55091307	45.69	protein_coding	heat shock protein 1 (chaperonin 10)	900.051	0.39661	0.119828	3.30983	0.000933519	0.0142559		1.31641	3175
ENSMUSG00000025810	Nrp1	128359073	128505462	41.75	protein_coding	neuropilin 1	831.879	0.396376	0.143701	2.75834	0.00580965	0.0510791		1.3162	146389
ENSMUSG00000096592	Gm15801	40560537	40561058	42.91	processed_pseudogene	predicted gene 15801	53.4995	0.396331	0.148627	2.66662	0.00766192	0.0610984		1.31616	521
ENSMUSG00000058392	Rrp1b	32036100	32062865	48.58	protein_coding	ribosomal RNA processing 1 homolog B (S. cerevisiae)	152.058	0.396329	0.110473	3.58758	0.000333763	0.00692469		1.31616	26765
ENSMUSG00000016427	Ndufa1	37187588	37191163	44.55	protein_coding	NADH dehydrogenase (ubiquinone) 1 alpha subcomplex, 1	635.125	0.396158	0.118172	3.35237	0.000801225	0.0128163		1.316	3575
ENSMUSG00000020664	Dld	31331564	31351437	39.59	protein_coding	dihydrolipoamide dehydrogenase	1436.52	0.395995	0.140594	2.81658	0.00485377	0.0450799		1.31585	19873
ENSMUSG00000050315	Synpo2	123076519	123236149	43.06	protein_coding	synaptopodin 2	73.7344	0.395777	0.159805	2.47662	0.0132633	0.0877549		1.31565	159630
ENSMUSG00000079737	3110001I22Rik	13671929	13678405	43.94	protein_coding	RIKEN cDNA 3110001I22 gene	28.9007	0.395461	0.153749	2.57211	0.0101079	0.0736319		1.31536	6476
ENSMUSG00000029634	Rnf6	146209192	146221555	43.02	protein_coding	ring finger protein (C3H2C3 type) 6	981.919	0.395419	0.0746498	5.29698	1.17732e-07	1.41977e-05		1.31532	12363
ENSMUSG00000037172	E330009J07Rik	40401375	40436135	45.71	protein_coding	RIKEN cDNA E330009J07 gene	1520.3	0.395258	0.114841	3.44178	0.000577896	0.0103726		1.31518	34760
ENSMUSG00000028911	Srsf4	131873617	131901706	45.07	protein_coding	serine/arginine-rich splicing factor 4	666.648	0.395239	0.129119	3.06105	0.00220562	0.0259121		1.31516	28089
ENSMUSG00000015749	Anp32e	95929246	95947390	46.55	protein_coding	acidic (leucine-rich) nuclear phosphoprotein 32 family, member E	1169.7	0.394965	0.134201	2.94309	0.00324953	0.0340297		1.31491	18144
ENSMUSG00000054720	Lrrc8c	105519388	105613018	44.59	protein_coding	leucine rich repeat containing 8 family, member C	471.1	0.394569	0.0840308	4.69552	2.65927e-06	0.00018083		1.31455	93630
ENSMUSG00000018648	Dusp14	84048041	84069261	47.18	protein_coding	dual specificity phosphatase 14	581.623	0.393743	0.140787	2.79672	0.00516241	0.0472079		1.3138	21220
ENSMUSG00000027351	Spred1	117121374	117182279	37.86	protein_coding	sprouty protein with EVH-1 domain 1, related sequence	5127.24	0.393044	0.104818	3.74977	0.000176999	0.00433677		1.31316	60905
ENSMUSG00000026173	Plcd4	74542888	74567794	46.08	protein_coding	phospholipase C, delta 4	193.224	0.39268	0.0902927	4.34897	1.36777e-05	0.000639787		1.31283	24906
ENSMUSG00000032249	Anp32a	62341293	62378812	51.08	protein_coding	acidic (leucine-rich) nuclear phosphoprotein 32 family, member A	2286.78	0.392141	0.0964961	4.0638	4.82793e-05	0.0016343		1.31234	37519
ENSMUSG00000078684	5830417I10Rik	88775216	88825587	44.29	unprocessed_pseudogene	RIKEN cDNA 5830417I10 gene	68.8778	0.392113	0.125633	3.1211	0.00180179	0.0226855		1.31231	50371
ENSMUSG00000013089	Etv5	22381309	22439719	46.37	protein_coding	ets variant 5	941.856	0.391794	0.132965	2.94659	0.003213	0.0337847		1.31202	58410
ENSMUSG00000003382	Etv3	87525407	87540156	47.97	protein_coding	ets variant 3	411.726	0.391749	0.0904638	4.33045	1.48803e-05	0.000678561		1.31198	14749
ENSMUSG00000020482	Ccdc117	5528887	5542187	45.12	protein_coding	coiled-coil domain containing 117	296.864	0.391625	0.12255	3.19564	0.00139519	0.0188686		1.31187	13300
ENSMUSG00000042903	Foxo4	101254528	101260873	52.33	protein_coding	forkhead box O4	168.905	0.391515	0.161741	2.42063	0.0154938	0.0968052		1.31177	6345
ENSMUSG00000031347	Cetn2	72913532	72918411	39.49	protein_coding	centrin 2	457.206	0.391362	0.117088	3.34246	0.000830386	0.0131196		1.31163	4879
ENSMUSG00000040451	Sgms1	32122727	32389714	43.86	protein_coding	sphingomyelin synthase 1	712.517	0.390987	0.0626858	6.23725	4.45336e-10	1.206e-07		1.31129	266987
ENSMUSG00000028634	Hivep3	119733784	120138045	47.59	protein_coding	human immunodeficiency virus type I enhancer binding protein 3	1124.67	0.390206	0.129596	3.01094	0.0026044	0.0291315		1.31058	404261
ENSMUSG00000018401	Mtmr4	87592162	87616302	48.15	protein_coding	myotubularin related protein 4	1277.29	0.390136	0.0652361	5.98037	2.22627e-09	4.84009e-07		1.31052	24140
ENSMUSG00000026078	Pdcl3	38985608	38997238	46.92	protein_coding	phosducin-like 3	323.094	0.389676	0.119546	3.25962	0.00111561	0.0160361		1.3101	11630
ENSMUSG00000033377	Palmd	116918256	116968987	41.86	protein_coding	palmdelphin	326.075	0.389565	0.138816	2.80634	0.00501081	0.0460946		1.31	50731
ENSMUSG00000051341	Zfp52	21555046	21562066	39.2	protein_coding	zinc finger protein 52	125.221	0.389493	0.108708	3.58293	0.000339756	0.00699263		1.30993	7020
ENSMUSG00000056608	Chd9	90828835	91054508	42.15	protein_coding	chromodomain helicase DNA binding protein 9	2413.47	0.389124	0.0813252	4.78479	1.71163e-06	0.000124041		1.3096	225673
ENSMUSG00000037197	Rbm17	11585437	11604153	44.84	protein_coding	RNA binding motif protein 17	708.382	0.388809	0.116072	3.34971	0.000808965	0.0129133		1.30931	18716
ENSMUSG00000032360	Hcrtr2	76225880	76323856	37.71	protein_coding	hypocretin (orexin) receptor 2	66.0963	0.388751	0.151865	2.55985	0.0104718	0.0754249		1.30926	97976
ENSMUSG00000031060	Rbm10	20617503	20650901	46	protein_coding	RNA binding motif protein 10	674.672	0.388613	0.0714419	5.43957	5.34082e-08	7.23166e-06		1.30913	33398
ENSMUSG00000029359	Tesc	118027743	118061878	52.87	protein_coding	tescalcin	149.948	0.388594	0.14323	2.71308	0.00666618	0.0554335		1.30912	34135
ENSMUSG00000041360	D19Bwg1357e	27388702	27429820	42.65	protein_coding	DNA segment, Chr 19, Brigham & Women's Genetics 1357 expressed	543.36	0.387844	0.113644	3.41281	0.000642972	0.0109789		1.30844	41118
ENSMUSG00000037013	Ss18	14624198	14682914	43.15	protein_coding	synovial sarcoma translocation, Chromosome 18	473.395	0.387815	0.0947405	4.09345	4.25008e-05	0.00148091		1.30841	58716
ENSMUSG00000009293	Ube2g2	77622275	77645993	48.59	protein_coding	ubiquitin-conjugating enzyme E2G 2	304.642	0.387679	0.0803961	4.82211	1.42046e-06	0.000105586		1.30829	23718
ENSMUSG00000098239	Pclo	14861407	14863459	32.44	lincRNA	piccolo (presynaptic cytomatrix protein)	193.615	0.387306	0.124827	3.10274	0.0019174	0.023602		1.30795	2052
ENSMUSG00000029623	Pdap1	145128769	145140238	50.36	protein_coding	PDGFA associated protein 1	1315.29	0.386797	0.120618	3.20678	0.00134228	0.018399		1.30749	11469
ENSMUSG00000059291	Rpl11	136028265	136053428	47.24	protein_coding	ribosomal protein L11	1143.55	0.386712	0.114535	3.37637	0.000734496	0.0121388		1.30741	25163
ENSMUSG00000022000	Zc3h13	75284373	75344426	38.92	protein_coding	zinc finger CCCH type containing 13	1745.31	0.386604	0.0903791	4.27758	1.88936e-05	0.000777712		1.30731	60053
ENSMUSG00000047230	Cldn2	139800828	139811386	46.05	protein_coding	claudin 2	13.2037	0.386197	0.150365	2.56839	0.0102172	0.0743229		1.30694	10558
ENSMUSG00000003360	Ddx23	98645134	98662889	50.34	protein_coding	DEAD (Asp-Glu-Ala-Asp) box polypeptide 23	981.845	0.385906	0.127889	3.01751	0.00254865	0.028695		1.30668	17755
ENSMUSG00000001089	Luzp1	136469761	136554780	40.42	protein_coding	leucine zipper protein 1	2184.56	0.385869	0.118381	3.25954	0.00111593	0.0160361		1.30665	85019
ENSMUSG00000058402	Zfp420	29859979	29877292	43.38	protein_coding	zinc finger protein 420	194.118	0.385536	0.0875818	4.40201	1.07253e-05	0.000532335		1.30634	17313
ENSMUSG00000061032	Rrp1	78400362	78413043	53.11	protein_coding	ribosomal RNA processing 1 homolog (S. cerevisiae)	3311.27	0.384269	0.111898	3.43411	0.000594506	0.0105118		1.3052	12681
ENSMUSG00000021606	Ndufs6	73319874	73328542	47.33	protein_coding	NADH dehydrogenase (ubiquinone) Fe-S protein 6	816.097	0.384155	0.129518	2.96602	0.00301677	0.0320488		1.30509	8668
ENSMUSG00000019471	Cdc37	21138541	21149906	51.62	protein_coding	cell division cycle 37	1077.71	0.383831	0.120677	3.18064	0.00146952	0.0195548		1.3048	11365
ENSMUSG00000002748	Baz1b	135187264	135246129	43.16	protein_coding	bromodomain adjacent to zinc finger domain, 1B	2263.49	0.382907	0.0857228	4.4668	7.93971e-06	0.000428522		1.30397	58865
ENSMUSG00000017776	Crk	75679259	75706908	43.52	protein_coding	v-crk sarcoma virus CT10 oncogene homolog (avian)	1751.6	0.382764	0.0859471	4.45348	8.44882e-06	0.000451266		1.30384	27649
ENSMUSG00000026608	Kctd3	188971095	189007841	46.21	protein_coding	potassium channel tetramerisation domain containing 3	1003.93	0.381425	0.121122	3.1491	0.00163774	0.021226		1.30263	36746
ENSMUSG00000044550	Tceal3	136590842	136668378	40.29	protein_coding	transcription elongation factor A (SII)-like 3	1394.24	0.381228	0.133935	2.84636	0.00442215	0.0422403		1.30245	77536
ENSMUSG00000031715	Smarca5	80698507	80739497	37.47	protein_coding	SWI/SNF related, matrix associated, actin dependent regulator of chromatin, subfamily a, member 5	2179.2	0.381083	0.0762392	4.99852	5.77731e-07	4.98204e-05		1.30232	40990
ENSMUSG00000021681	Aggf1	95350683	95375352	43.49	protein_coding	angiogenic factor with G patch and FHA domains 1	802.278	0.380727	0.0988462	3.85171	0.000117296	0.00325789		1.302	24669
ENSMUSG00000031511	Arhgef7	11728105	11835219	48.81	protein_coding	Rho guanine nucleotide exchange factor (GEF7)	1804.61	0.379892	0.0841545	4.51422	6.35491e-06	0.000370168		1.30124	107114
ENSMUSG00000031701	Dnaja2	85537640	85555271	40.73	protein_coding	DnaJ (Hsp40) homolog, subfamily A, member 2	2578.38	0.379595	0.11543	3.28852	0.00100714	0.0149483		1.30098	17631
ENSMUSG00000036097	Fam178a	44931119	44983787	41.17	protein_coding	family with sequence similarity 178, member A	1090.29	0.379462	0.0745678	5.08882	3.60294e-07	3.3503e-05		1.30086	52668
ENSMUSG00000040957	Cables1	11839220	11945627	48.4	protein_coding	CDK5 and Abl enzyme substrate 1	236.04	0.379243	0.110476	3.43282	0.000597348	0.0105259		1.30066	106407
ENSMUSG00000041220	Elovl6	129532386	129638495	44.39	protein_coding	ELOVL family member 6, elongation of long chain fatty acids (yeast)	1003.98	0.378901	0.0923725	4.10188	4.09808e-05	0.00143442		1.30035	106109
ENSMUSG00000042215	Bag2	33745484	33757795	47.61	protein_coding	BCL2-associated athanogene 2	120.066	0.378524	0.111599	3.39181	0.00069432	0.0116116		1.30001	12311
ENSMUSG00000036371	Serbp1	67266979	67289302	37.1	protein_coding	serpine1 mRNA binding protein 1	4142.4	0.378239	0.129989	2.90977	0.00361698	0.0367556		1.29975	22323
ENSMUSG00000020708	Psmc5	106256154	106263120	48.37	protein_coding	protease (prosome, macropain) 26S subunit, ATPase 5	1639.57	0.378227	0.138783	2.72531	0.00642408	0.0540688		1.29974	6966
ENSMUSG00000033282	Rpgrip1l	91217030	91313262	39.84	protein_coding	Rpgrip1-like	774.046	0.378117	0.068167	5.54693	2.90725e-08	4.31503e-06		1.29964	96232
ENSMUSG00000026577	Blzf1	164289800	164307489	41.23	protein_coding	basic leucine zipper nuclear factor 1	367.76	0.377119	0.0915626	4.1187	3.81011e-05	0.00136774		1.29875	17689
ENSMUSG00000040183	Ankrd6	32804035	32950841	46.56	protein_coding	ankyrin repeat domain 6	721.679	0.3771	0.0990021	3.80901	0.000139524	0.00368152		1.29873	146806
ENSMUSG00000024477	Pggt1b	46239949	46280850	41.48	protein_coding	protein geranylgeranyltransferase type I, beta subunit	244.249	0.376875	0.0968739	3.89037	0.000100093	0.0029012		1.29853	40901
ENSMUSG00000080268	Brms1	5041404	5049917	52.34	protein_coding	breast cancer metastasis-suppressor 1	114.013	0.376616	0.133232	2.82676	0.0047021	0.044069		1.29829	8513
ENSMUSG00000040836	Gpr161	165295789	165326745	48.25	protein_coding	G protein-coupled receptor 161	431.663	0.376514	0.148877	2.52903	0.011438	0.0794941		1.2982	30956
ENSMUSG00000038539	Atf5	44812257	44816658	56.25	protein_coding	activating transcription factor 5	60.9232	0.37651	0.132643	2.83853	0.00453213	0.0428927		1.2982	4401
ENSMUSG00000031627	Irf2	46739745	46847458	44.21	protein_coding	interferon regulatory factor 2	149.509	0.376155	0.143436	2.62245	0.00872994	0.0671427		1.29788	107713
ENSMUSG00000037926	Ssh2	77216287	77460220	39.76	protein_coding	slingshot homolog 2 (Drosophila)	1083.26	0.375468	0.0801449	4.68486	2.8015e-06	0.000188838		1.29726	243933
ENSMUSG00000052681	Rap1b	117814471	117845935	42.21	protein_coding	RAS related protein 1b	635.702	0.375	0.0706164	5.31038	1.09397e-07	1.35092e-05		1.29684	31464
ENSMUSG00000021613	Hapln1	89540636	89611832	38.14	protein_coding	hyaluronan and proteoglycan link protein 1	378.492	0.374888	0.109827	3.41343	0.000641503	0.0109789		1.29674	71196
ENSMUSG00000039117	Taf4a	179912146	179976646	48.99	protein_coding	TAF4A RNA polymerase II, TATA box binding protein (TBP)-associated factor	181.476	0.374756	0.107301	3.49256	0.000478413	0.00895125		1.29662	64500
ENSMUSG00000030619	Eed	89954656	89980983	40.87	protein_coding	embryonic ectoderm development	190.646	0.374716	0.124909	2.99992	0.00270055	0.029818		1.29658	26327
ENSMUSG00000023068	Nus1	52417547	52440192	41.31	protein_coding	nuclear undecaprenyl pyrophosphate synthase 1 homolog (S. cerevisiae)	897.034	0.374615	0.0883819	4.2386	2.24921e-05	0.000897126		1.29649	22645
ENSMUSG00000021270	Hsp90aa1	110690605	110702728	47.9	protein_coding	heat shock protein 90, alpha (cytosolic), class A member 1	22636.4	0.374422	0.0794214	4.71436	2.42466e-06	0.000167998		1.29632	12123
ENSMUSG00000052353	Cemip	83932857	84086502	45.96	protein_coding	cell migration inducing protein, hyaluronan binding	395.51	0.374177	0.144415	2.59099	0.00957	0.0712603		1.2961	153645
ENSMUSG00000021457	Syk	52583173	52648792	47	protein_coding	spleen tyrosine kinase	46.8615	0.373832	0.145004	2.57808	0.00993522	0.072717		1.29579	65619
ENSMUSG00000021782	Dlg5	24133953	24245920	49.81	protein_coding	discs, large homolog 5 (Drosophila)	481.04	0.373744	0.110665	3.37726	0.00073213	0.0121387		1.29571	111967
ENSMUSG00000036112	Metap2	93858489	93897093	41.99	protein_coding	methionine aminopeptidase 2	906.912	0.373414	0.123976	3.01198	0.0025955	0.0290904		1.29541	38604
ENSMUSG00000020484	Xbp1	5520659	5525893	51.19	protein_coding	X-box binding protein 1	765.323	0.373308	0.100028	3.73205	0.000189926	0.00460234		1.29532	5234
ENSMUSG00000034209	Rasl10a	5058128	5060385	57.35	protein_coding	RAS-like, family 10, member A	85.6946	0.37324	0.13997	2.66657	0.00766303	0.0610984		1.29526	2257
ENSMUSG00000034575	Papd7	69497959	69533839	48.58	protein_coding	PAP associated domain containing 7	529.408	0.373161	0.0909542	4.10273	4.08303e-05	0.0014324		1.29519	35880
ENSMUSG00000059005	Hnrnpa3	75659261	75669407	40.65	protein_coding	heterogeneous nuclear ribonucleoprotein A3	1602.22	0.372959	0.121976	3.05764	0.0022309	0.0261078		1.29501	10146
ENSMUSG00000001143	Lman2l	36419871	36445271	47.29	protein_coding	lectin, mannose-binding 2-like	272.969	0.372594	0.102055	3.6509	0.000261324	0.00572983		1.29468	25400
ENSMUSG00000054034	Tceal5	136200948	136203876	49.4	protein_coding	transcription elongation factor A (SII)-like 5	1556.44	0.372592	0.141547	2.63228	0.00848139	0.0657223		1.29468	2928
ENSMUSG00000061458	Nol10	17348458	17430094	43.65	protein_coding	nucleolar protein 10	346.69	0.371945	0.085226	4.36422	1.27575e-05	0.000611568		1.2941	81636
ENSMUSG00000052632	Asap2	21111748	21270171	47.25	protein_coding	ArfGAP with SH3 domain, ankyrin repeat and PH domain 2	409.451	0.371462	0.135134	2.74883	0.00598077	0.0518647		1.29366	158423
ENSMUSG00000048799	Cep120	53681724	53744547	42.99	protein_coding	centrosomal protein 120	555.125	0.371296	0.0861775	4.30851	1.64358e-05	0.000726458		1.29351	62823
ENSMUSG00000003402	Prkcsh	22003035	22014219	53.88	protein_coding	protein kinase C substrate 80K-H	669.108	0.371102	0.0688642	5.3889	7.08919e-08	8.96957e-06		1.29334	11184
ENSMUSG00000053841	Txlna	129626078	129641065	49.73	protein_coding	taxilin alpha	631.884	0.371078	0.0719932	5.15435	2.5451e-07	2.51834e-05		1.29332	14987
ENSMUSG00000029992	Gfpt1	87042846	87092197	42.76	protein_coding	glutamine fructose-6-phosphate transaminase 1	1315.42	0.371066	0.0742255	4.99916	5.75799e-07	4.98204e-05		1.29331	49351
ENSMUSG00000037852	Cpe	64592558	64693040	42.69	protein_coding	carboxypeptidase E	10110	0.370974	0.11937	3.10775	0.00188515	0.0234128		1.29323	100482
ENSMUSG00000056501	Cebpb	167688915	167690418	67.15	protein_coding	CCAAT/enhancer binding protein (C/EBP), beta	54.8199	0.370824	0.152108	2.4379	0.014773	0.094074		1.29309	1503
ENSMUSG00000048874	Phf3	30802339	30873921	39.53	protein_coding	PHD finger protein 3	2754.57	0.369532	0.0670151	5.51415	3.5046e-08	5.10349e-06		1.29193	71582
ENSMUSG00000060771	Tsga10	37754776	37866429	40.33	protein_coding	testis specific 10	345.37	0.369218	0.0977122	3.77862	0.000157698	0.00404356		1.29165	111653
ENSMUSG00000030805	Stx4a	127824294	127849019	48.04	protein_coding	syntaxin 4A (placental)	295.42	0.369053	0.149741	2.46461	0.0137163	0.0897899		1.2915	24725
ENSMUSG00000002250	Ppard	28232754	28301469	52.87	protein_coding	peroxisome proliferator activator receptor delta	95.346	0.368802	0.144809	2.54681	0.0108711	0.0770462		1.29128	68715
ENSMUSG00000022698	Naa50	44139830	44163366	38.28	protein_coding	N(alpha)-acetyltransferase 50, NatE catalytic subunit	923.2	0.368668	0.083588	4.41054	1.03113e-05	0.000518035		1.29116	23536
ENSMUSG00000019861	Gopc	52337024	52382124	40.17	protein_coding	golgi associated PDZ and coiled-coil motif containing	804.826	0.368213	0.135603	2.71537	0.00662008	0.0552067		1.29075	45100
ENSMUSG00000032702	Kank1	25236975	25434496	45.81	protein_coding	KN motif and ankyrin repeat domains 1	278.344	0.36744	0.09843	3.733	0.000189209	0.0045993		1.29006	197521
ENSMUSG00000048118	Arid4a	71015990	71098592	42.99	protein_coding	AT rich interactive domain 4A (RBP1-like)	1432.89	0.367388	0.112152	3.2758	0.00105362	0.0154438		1.29001	82602
ENSMUSG00000026031	Cflar	58711508	58758884	44.88	protein_coding	CASP8 and FADD-like apoptosis regulator	341.446	0.36735	0.106957	3.43456	0.000593506	0.0105062		1.28998	47376
ENSMUSG00000044795	Cyb5d1	69391925	69395631	47.42	protein_coding	cytochrome b5 domain containing 1	308.509	0.366713	0.0971041	3.77649	0.000159055	0.00405145		1.28941	3706
ENSMUSG00000029014	Dnajc2	21757267	21785251	43.45	protein_coding	DnaJ (Hsp40) homolog, subfamily C, member 2	523.668	0.366476	0.101518	3.60996	0.000306242	0.00646668		1.2892	27984
ENSMUSG00000025889	Snca	60731573	60829855	37.81	protein_coding	synuclein, alpha	3208.69	0.366464	0.138821	2.63984	0.00829458	0.0646969		1.28919	98282
ENSMUSG00000027804	Ppid	79591342	79603650	41.12	protein_coding	peptidylprolyl isomerase D (cyclophilin D)	1468.92	0.366292	0.0911143	4.02014	5.81646e-05	0.00191028		1.28904	12308
ENSMUSG00000034336	Ina	47014698	47025327	48.3	protein_coding	internexin neuronal intermediate filament protein, alpha	1343.4	0.366291	0.117865	3.10771	0.00188545	0.0234128		1.28903	10629
ENSMUSG00000041133	Smc1a	152016428	152062694	41.88	protein_coding	structural maintenance of chromosomes 1A	1866.73	0.365525	0.12584	2.90468	0.00367623	0.0371376		1.28835	46266
ENSMUSG00000020719	Ddx5	106780355	106789185	43.97	protein_coding	DEAD (Asp-Glu-Ala-Asp) box polypeptide 5	10347.7	0.364427	0.112429	3.24139	0.00118947	0.0166915		1.28737	8830
ENSMUSG00000022807	Osbpl11	33185071	33243311	43.23	protein_coding	oxysterol binding protein-like 11	315.607	0.36374	0.0892117	4.07727	4.55682e-05	0.00156657		1.28676	58240
ENSMUSG00000022849	Hspbap1	35770386	35828446	44.24	protein_coding	Hspb associated protein 1	70.1597	0.363202	0.131489	2.76222	0.00574097	0.0507837		1.28628	58060
ENSMUSG00000020256	Aldh1l2	83487450	83534140	45.88	protein_coding	aldehyde dehydrogenase 1 family, member L2	77.5167	0.363052	0.131872	2.75307	0.00590396	0.0514588		1.28614	46690
ENSMUSG00000042133	Ppig	69722545	69754012	37.73	protein_coding	peptidyl-prolyl isomerase G (cyclophilin G)	1242.42	0.36301	0.107792	3.36768	0.000758044	0.0124084		1.28611	31467
ENSMUSG00000028343	Erp44	48193323	48279558	39.2	protein_coding	endoplasmic reticulum protein 44	506.153	0.362637	0.0718415	5.04774	4.47062e-07	3.98893e-05		1.28577	86235
ENSMUSG00000038170	Pde4dip	97689824	97888707	44.36	protein_coding	phosphodiesterase 4D interacting protein (myomegalin)	5022.03	0.362306	0.0649701	5.57651	2.45393e-08	3.75039e-06		1.28548	198883
ENSMUSG00000028322	Exosc3	45316613	45342732	44.24	protein_coding	exosome component 3	94.3303	0.362179	0.128632	2.81562	0.00486832	0.0451878		1.28537	26119
ENSMUSG00000027422	Rrbp1	143947395	144011263	47.04	protein_coding	ribosome binding protein 1	800.053	0.36206	0.119805	3.02208	0.00251045	0.0283893		1.28526	63868
ENSMUSG00000022601	Zbtb11	55973883	56008913	40.94	protein_coding	zinc finger and BTB domain containing 11	1476.52	0.361637	0.0524925	6.88931	5.60626e-12	2.62237e-09		1.28488	35030
ENSMUSG00000002028	Kmt2a	44803355	44881296	45.68	protein_coding	lysine (K)-specific methyltransferase 2A	3279.43	0.361421	0.0992736	3.64066	0.000271938	0.00590386		1.28469	77941
ENSMUSG00000004535	Tax1bp1	52713729	52766780	38.65	protein_coding	Tax1 (human T cell leukemia virus type I) binding protein 1	2656.78	0.361229	0.105214	3.43328	0.000596333	0.01052		1.28452	53051
ENSMUSG00000040584	Abcb1a	8660077	8748575	39.91	protein_coding	ATP-binding cassette, sub-family B (MDR/TAP), member 1A	349.999	0.361003	0.131092	2.75382	0.0058905	0.0513996		1.28432	88498
ENSMUSG00000039219	Arid4b	14063232	14199603	38.56	protein_coding	AT rich interactive domain 4B (RBP1-like)	1485.77	0.360742	0.103801	3.47532	0.000510252	0.00943264		1.28409	136371
ENSMUSG00000021224	Numb	83794034	83921934	40.91	protein_coding	numb gene homolog (Drosophila)	542.626	0.360489	0.130741	2.75727	0.00582861	0.0510953		1.28386	127900
ENSMUSG00000018666	Cbx1	96789127	96808640	42.97	protein_coding	chromobox 1	495.68	0.360465	0.0867568	4.15489	3.25438e-05	0.00120179		1.28384	19513
ENSMUSG00000025813	Homer2	81600481	81706925	46.45	protein_coding	homer homolog 2 (Drosophila)	1407.59	0.360077	0.11193	3.21699	0.00129545	0.0178701		1.28349	106444
ENSMUSG00000040524	Zfp609	65692391	65827564	42.61	protein_coding	zinc finger protein 609	636.959	0.360071	0.117203	3.0722	0.00212485	0.025308		1.28349	135173
ENSMUSG00000000838	Fmr1	68678541	68717963	35.06	protein_coding	fragile X mental retardation syndrome 1	1513.38	0.360033	0.108597	3.31532	0.000915385	0.014082		1.28346	39422
ENSMUSG00000020580	Rock2	16894978	16988274	37.14	protein_coding	Rho-associated coiled-coil containing protein kinase 2	8040.81	0.359984	0.0635019	5.66888	1.43738e-08	2.31119e-06		1.28341	93296
ENSMUSG00000041688	Amot	145446425	145505181	41.52	protein_coding	angiomotin	440.791	0.359303	0.0990479	3.62757	0.000286097	0.0061336		1.28281	58756
ENSMUSG00000057069	Ero1lb	12565883	12609526	41.33	protein_coding	ERO1-like beta (S. cerevisiae)	358.448	0.359165	0.0847254	4.23916	2.24358e-05	0.000897126		1.28268	43643
ENSMUSG00000019659	Ccdc12	110656503	110711590	49.64	protein_coding	coiled-coil domain containing 12	196.671	0.358902	0.111049	3.23192	0.0012296	0.0171009		1.28245	55087
ENSMUSG00000042487	Leo1	75441524	75466432	46.14	protein_coding	Leo1, Paf1/RNA polymerase II complex component, homolog (S. cerevisiae)	627.022	0.358641	0.0945326	3.79384	0.000148337	0.00385886		1.28222	24908
ENSMUSG00000028967	Errfi1	150853919	150868892	43.8	protein_coding	ERBB receptor feedback inhibitor 1	542.115	0.358548	0.1066	3.36349	0.000769627	0.0125316		1.28213	14973
ENSMUSG00000042079	Hnrnpf	117900324	117925622	44.9	protein_coding	heterogeneous nuclear ribonucleoprotein F	822.055	0.358106	0.095286	3.75822	0.000171126	0.00425362		1.28174	25298
ENSMUSG00000032058	Ppp2r1b	50845301	50894229	46.9	protein_coding	protein phosphatase 2, regulatory subunit A, beta	105.295	0.358004	0.131371	2.72513	0.0064276	0.0540689		1.28165	48928
ENSMUSG00000053004	Hrh1	114397936	114483296	49.09	protein_coding	histamine receptor H1	180.788	0.358003	0.138	2.59422	0.00948044	0.0708669		1.28165	85360
ENSMUSG00000027184	Caprin1	103762941	103797649	38.77	protein_coding	cell cycle associated protein 1	4403.08	0.356468	0.0468363	7.61093	2.72132e-14	2.0003e-11		1.28029	34708
ENSMUSG00000020134	Peli1	21091291	21150323	38.66	protein_coding	pellino 1	488.679	0.356438	0.107698	3.30959	0.000934312	0.0142559		1.28026	59032
ENSMUSG00000024921	Smarca2	26605115	26778321	44.65	protein_coding	SWI/SNF related, matrix associated, actin dependent regulator of chromatin, subfamily a, member 2	5729.78	0.355662	0.112156	3.17114	0.00151842	0.0199815		1.27957	173206
ENSMUSG00000020272	Stk10	32533305	32624587	50.4	protein_coding	serine/threonine kinase 10	163.539	0.355143	0.135171	2.62736	0.00860493	0.0664129		1.27911	91282
ENSMUSG00000030232	Aebp2	140622449	140678472	44.46	protein_coding	AE binding protein 2	899.12	0.354894	0.102225	3.4717	0.00051717	0.00953768		1.27889	56023
ENSMUSG00000026698	Pigc	161969186	161973435	43.6	protein_coding	phosphatidylinositol glycan anchor biosynthesis, class C	126.164	0.354838	0.132158	2.68496	0.00725394	0.0589523		1.27884	4249
ENSMUSG00000060032	H2afj	136808244	136810070	54.57	protein_coding	H2A histone family, member J	83.6796	0.354774	0.132834	2.6708	0.00756707	0.0606465		1.27879	1826
ENSMUSG00000044150	A830080D01Rik	159526688	159593081	39.35	protein_coding	RIKEN cDNA A830080D01 gene	204.713	0.354729	0.100717	3.52205	0.000428228	0.00826265		1.27875	66393
ENSMUSG00000021024	Psma6	55384222	55418454	43.65	protein_coding	proteasome (prosome, macropain) subunit, alpha type 6	453.549	0.354719	0.121243	2.92569	0.00343691	0.0354432		1.27874	34232
ENSMUSG00000032849	Abcc4	118482692	118706219	46.56	protein_coding	ATP-binding cassette, sub-family C (CFTR/MRP), member 4	113.692	0.354717	0.133085	2.66534	0.00769103	0.0612879		1.27873	223527
ENSMUSG00000025337	Sbds	130245731	130255530	47.21	protein_coding	Shwachman-Bodian-Diamond syndrome homolog (human)	806.895	0.354196	0.0995628	3.55751	0.000374383	0.00754436		1.27827	9799
ENSMUSG00000025198	Erlin1	44034944	44069785	40.75	protein_coding	ER lipid raft associated 1	316.822	0.354149	0.115254	3.07277	0.00212085	0.0252799		1.27823	34841
ENSMUSG00000039990	Edrf1	133637543	133672971	42.61	protein_coding	erythroid differentiation regulatory factor 1	531.42	0.35413	0.088352	4.00818	6.11896e-05	0.00200111		1.27821	35428
ENSMUSG00000028832	Stmn1	134468320	134473843	47.19	protein_coding	stathmin 1	3065.87	0.35391	0.133679	2.64746	0.00810979	0.0635768		1.27802	5523
ENSMUSG00000074305	Peak1	56201126	56418067	40.28	protein_coding	pseudopodium-enriched atypical kinase 1	1774	0.35385	0.105294	3.36058	0.000777785	0.0126245		1.27797	216941
ENSMUSG00000002881	Nab1	52457294	52500679	41.06	protein_coding	Ngfi-A binding protein 1	586.824	0.353818	0.0837354	4.22543	2.38488e-05	0.000931973		1.27794	43385
ENSMUSG00000026819	Slc25a25	32414487	32451445	47.21	protein_coding	solute carrier family 25 (mitochondrial carrier, phosphate carrier), member 25	710.492	0.353563	0.0814527	4.34071	1.42021e-05	0.00065917		1.27771	36958
ENSMUSG00000024081	Cebpz	78919006	78937070	41.25	protein_coding	CCAAT/enhancer binding protein zeta	856.304	0.353388	0.0638919	5.53104	3.18341e-08	4.67992e-06		1.27756	18064
ENSMUSG00000033099	Nol12	78934933	78943634	52.51	protein_coding	nucleolar protein 12	136.707	0.353295	0.143625	2.45984	0.0138999	0.0904086		1.27748	8701
ENSMUSG00000032262	Elovl4	83778692	83806277	42.65	protein_coding	elongation of very long chain fatty acids (FEN1/Elo2, SUR4/Elo3, yeast)-like 4	816.212	0.353182	0.0940405	3.75564	0.0001729	0.00428394		1.27737	27585
ENSMUSG00000055065	Ddx17	79527707	79546741	43.98	protein_coding	DEAD (Asp-Glu-Ala-Asp) box polypeptide 17	3109.72	0.353176	0.0633936	5.57117	2.53035e-08	3.82926e-06		1.27737	19034
ENSMUSG00000054766	Set	30057378	30072577	48.87	protein_coding	SET nuclear oncogene	2903.27	0.353114	0.089809	3.93183	8.43009e-05	0.0025666		1.27731	15199
ENSMUSG00000022012	Enox1	77156763	77721760	43.16	protein_coding	ecto-NOX disulfide-thiol exchanger 1	603.211	0.352975	0.102179	3.45447	0.000551367	0.0100011		1.27719	564997
ENSMUSG00000082145	Gm12312	70358138	70358781	44.72	processed_pseudogene	predicted gene 12312	126.757	0.352876	0.11519	3.06343	0.00218816	0.0258427		1.2771	643
ENSMUSG00000042500	Ago4	126489541	126533472	42.68	protein_coding	argonaute RISC catalytic subunit 4	187.02	0.352696	0.107496	3.281	0.00103441	0.0152358		1.27694	43931
ENSMUSG00000071415	Rpl23	97777527	97782437	46.87	protein_coding	ribosomal protein L23	2146.78	0.352471	0.126096	2.79526	0.00518581	0.0473378		1.27675	4910
ENSMUSG00000070814	6330408A02Rik	13258967	13278721	45.53	protein_coding	RIKEN cDNA 6330408A02 gene	264.68	0.351949	0.132336	2.6595	0.00782558	0.0618559		1.27628	19754
ENSMUSG00000074656	Eif2s2	154871410	154892935	38.63	protein_coding	eukaryotic translation initiation factor 2, subunit 2 (beta)	801.454	0.351826	0.105733	3.32751	0.00087626	0.0136626		1.27618	21525
ENSMUSG00000022663	Atg3	45158785	45188538	36.76	protein_coding	autophagy related 3	650.116	0.351623	0.134778	2.60891	0.00908323	0.0689664		1.276	29753
ENSMUSG00000021311	Mtr	12186542	12258113	43.64	protein_coding	5-methyltetrahydrofolate-homocysteine methyltransferase	210.437	0.351528	0.0877426	4.00636	6.16628e-05	0.00201232		1.27591	71571
ENSMUSG00000036197	Gxylt1	93239742	93275161	44.08	protein_coding	glucoside xylosyltransferase 1	335.213	0.35143	0.11391	3.08517	0.00203438	0.0245142		1.27582	35419
ENSMUSG00000026596	Abl2	156558786	156649568	43.06	protein_coding	v-abl Abelson murine leukemia viral oncogene 2 (arg, Abelson-related gene)	1514.03	0.351073	0.0546809	6.4204	1.35916e-10	4.66222e-08		1.27551	90782
ENSMUSG00000048000	Gigyf2	87326998	87450796	39.42	protein_coding	GRB10 interacting GYF protein 2	1745.88	0.350597	0.092746	3.78018	0.000156713	0.0040317		1.27509	123798
ENSMUSG00000052419	2610001J05Rik	13867735	13871518	40.38	protein_coding	RIKEN cDNA 2610001J05 gene	174.64	0.350313	0.124954	2.80354	0.00505457	0.0463591		1.27484	3783
ENSMUSG00000062270	Morf4l1	90091665	90114774	40.53	protein_coding	mortality factor 4 like 1	4297.52	0.350241	0.141834	2.46938	0.0135348	0.0888658		1.27477	23109
ENSMUSG00000053470	Kdm3a	71588974	71632905	40.06	protein_coding	lysine (K)-specific demethylase 3A	616.842	0.35022	0.0817116	4.28605	1.81882e-05	0.00076386		1.27475	43931
ENSMUSG00000026499	Acbd3	180726043	180754204	42.05	protein_coding	acyl-Coenzyme A binding domain containing 3	625.436	0.350199	0.0991754	3.53111	0.00041382	0.00802478		1.27474	28161
ENSMUSG00000021188	Trip11	101834043	101913267	41.14	protein_coding	thyroid hormone receptor interactor 11	2028.44	0.349855	0.081593	4.28781	1.80443e-05	0.000763102		1.27443	79224
ENSMUSG00000026478	Lamc1	153218922	153332786	44.38	protein_coding	laminin, gamma 1	542.692	0.349802	0.0932122	3.75275	0.000174903	0.00430067		1.27439	113864
ENSMUSG00000049792	Bag5	111709488	111713257	53.13	protein_coding	BCL2-associated athanogene 5	564.774	0.349578	0.116043	3.01248	0.00259124	0.0290686		1.27419	3769
ENSMUSG00000056820	Tsnax	125012997	125034192	47.54	protein_coding	translin-associated factor X	1681.58	0.349023	0.119028	2.93227	0.00336496	0.0349304		1.2737	21195
ENSMUSG00000028330	Ncbp1	46138613	46172403	43.4	protein_coding	nuclear cap binding protein subunit 1	749.861	0.348793	0.0774401	4.50403	6.6676e-06	0.000381468		1.27349	33790
ENSMUSG00000028127	Abcd3	121758910	121815215	39.76	protein_coding	ATP-binding cassette, sub-family D (ALD), member 3	718.69	0.348597	0.0989274	3.52376	0.000425467	0.00821965		1.27332	56305
ENSMUSG00000027236	Eif3j1	122028546	122056598	40.38	protein_coding	eukaryotic translation initiation factor 3, subunit J1	179.738	0.348397	0.120369	2.8944	0.00379884	0.037954		1.27315	28052
ENSMUSG00000028527	Ak4	101419277	101466995	46.46	protein_coding	adenylate kinase 4	584.85	0.3482	0.115955	3.00288	0.00267439	0.0296353		1.27297	47718
ENSMUSG00000057421	Las1l	95935335	95956962	44.78	protein_coding	LAS1-like (S. cerevisiae)	453.061	0.34755	0.104918	3.3126	0.000924338	0.0141689		1.2724	21627
ENSMUSG00000028945	Rheb	24802823	24842624	43.12	protein_coding	Ras homolog enriched in brain	1078.07	0.347471	0.107769	3.22423	0.00126312	0.0174866		1.27233	39801
ENSMUSG00000026021	Sumo1	59586558	59670834	42.85	protein_coding	SMT3 suppressor of mif two 3 homolog 1 (yeast)	1301.28	0.347452	0.0691809	5.02238	5.10361e-07	4.45081e-05		1.27231	84276
ENSMUSG00000034243	Golgb1	36875140	36933085	43.81	protein_coding	golgi autoantigen, golgin subfamily b, macrogolgin 1	4646.65	0.347292	0.108616	3.19742	0.00138663	0.0188231		1.27217	57945
ENSMUSG00000044952	Kctd21	97332327	97350213	47.68	protein_coding	potassium channel tetramerisation domain containing 21	99.6279	0.347225	0.107405	3.23287	0.00122553	0.0170734		1.27211	17886
ENSMUSG00000034617	Mtrr	68560780	68582121	45.9	protein_coding	5-methyltetrahydrofolate-homocysteine methyltransferase reductase	262.604	0.347101	0.0831968	4.17205	3.01878e-05	0.00113377		1.272	21341
ENSMUSG00000026339	Ccdc93	121431049	121506460	47.89	protein_coding	coiled-coil domain containing 93	544.635	0.347087	0.0681492	5.09304	3.52362e-07	3.2964e-05		1.27199	75411
ENSMUSG00000022972	1110004E09Rik	90925809	90934927	52.15	protein_coding	RIKEN cDNA 1110004E09 gene	244.297	0.346499	0.13001	2.66518	0.00769474	0.0612879		1.27147	9118
ENSMUSG00000019487	Trip10	57249451	57263697	51.7	protein_coding	thyroid hormone receptor interactor 10	75.4798	0.346375	0.135409	2.55799	0.010528	0.0755977		1.27136	14246
ENSMUSG00000032633	Flcn	59791408	59810016	52.17	protein_coding	folliculin	258.052	0.346118	0.0772697	4.47935	7.48717e-06	0.000408045		1.27114	18608
ENSMUSG00000020397	Med7	46436925	46442721	41.66	protein_coding	mediator complex subunit 7	165.48	0.345923	0.094668	3.65407	0.000258119	0.00566841		1.27096	5796
ENSMUSG00000071369	Map3k5	19934472	20142753	43.75	protein_coding	mitogen-activated protein kinase kinase kinase 5	921.875	0.345866	0.0921221	3.75443	0.000173737	0.00429509		1.27091	208281
ENSMUSG00000036932	Aifm1	48474944	48513563	41.68	protein_coding	apoptosis-inducing factor, mitochondrion-associated 1	258.528	0.345768	0.119125	2.90256	0.00370128	0.0372832		1.27083	38619
ENSMUSG00000052253	Zfp622	25984366	25998482	41.8	protein_coding	zinc finger protein 622	344.581	0.345747	0.0822899	4.20157	2.65075e-05	0.00101783		1.27081	14116
ENSMUSG00000032244	Fem1b	62791832	62811648	42.32	protein_coding	feminization 1 homolog b (C. elegans)	3436.46	0.345726	0.0627479	5.50975	3.59339e-08	5.18388e-06		1.27079	19816
ENSMUSG00000040550	Otud6b	14809498	14826587	39.87	protein_coding	OTU domain containing 6B	1634.18	0.345402	0.0780513	4.42532	9.62989e-06	0.000492208		1.27051	17089
ENSMUSG00000049957	Ccdc137	120458115	120464358	51.73	protein_coding	coiled-coil domain containing 137	338.435	0.344838	0.10995	3.13631	0.00171088	0.0219163		1.27001	6243
ENSMUSG00000019883	Echdc1	29313166	29346661	38.11	protein_coding	enoyl Coenzyme A hydratase domain containing 1	329.002	0.344695	0.0914596	3.76882	0.000164019	0.00413693		1.26988	33495
ENSMUSG00000020124	Usp15	123113244	123196935	39.87	protein_coding	ubiquitin specific peptidase 15	1718.78	0.344471	0.0674445	5.10747	3.26493e-07	3.09187e-05		1.26969	83691
ENSMUSG00000021149	Gtpbp4	8972071	8996017	41.07	protein_coding	GTP binding protein 4	583.709	0.344355	0.0788617	4.36657	1.26213e-05	0.000609948		1.26958	23946
ENSMUSG00000055435	Maf	115682942	115707794	44.55	protein_coding	avian musculoaponeurotic fibrosarcoma (v-maf) AS42 oncogene homolog	313.104	0.343958	0.0960319	3.58171	0.000341355	0.00700686		1.26923	24852
ENSMUSG00000020661	Dnmt3a	3806007	3914443	51.22	protein_coding	DNA methyltransferase 3A	1523.95	0.342191	0.111443	3.07054	0.0021367	0.0253717		1.26768	108436
ENSMUSG00000037253	Mex3c	73573044	73592575	40.69	protein_coding	mex3 homolog C (C. elegans)	750.328	0.341945	0.0726627	4.70592	2.52728e-06	0.000174157		1.26746	19531
ENSMUSG00000023723	Mrps23	88204388	88211507	46.98	protein_coding	mitochondrial ribosomal protein S23	85.2156	0.341708	0.131999	2.58872	0.00963329	0.0716969		1.26726	7119
ENSMUSG00000000340	Dbt	116513070	116549976	44.05	protein_coding	dihydrolipoamide branched chain transacylase E2	214.958	0.341586	0.122949	2.77829	0.00546466	0.0489568		1.26715	36906
ENSMUSG00000001383	Zmat2	36793923	36799660	45.54	protein_coding	zinc finger, matrin type 2	1875.17	0.341379	0.0717717	4.75647	1.97011e-06	0.000138862		1.26697	5737
ENSMUSG00000016018	Skiv2l2	112867780	112927380	39.85	protein_coding	superkiller viralicidic activity 2-like 2 (S. cerevisiae)	1119.49	0.341358	0.108688	3.14072	0.00168533	0.0216789		1.26695	59600
ENSMUSG00000028609	Magoh	107879755	107887424	43.21	protein_coding	mago-nashi homolog, proliferation-associated (Drosophila)	252.841	0.341221	0.105298	3.24051	0.00119317	0.0167282		1.26683	7669
ENSMUSG00000031758	Cdyl2	116568724	116732991	45.37	protein_coding	chromodomain protein, Y chromosome-like 2	390.882	0.340801	0.133269	2.55725	0.0105504	0.0756733		1.26646	164267
ENSMUSG00000024188	Luc7l	26252910	26285504	42.57	protein_coding	Luc7 homolog (S. cerevisiae)-like	1321.31	0.340579	0.0649499	5.24372	1.57369e-07	1.76025e-05		1.26626	32594
ENSMUSG00000018209	Stk4	164070322	164155524	44.86	protein_coding	serine/threonine kinase 4	1067.24	0.340572	0.0586517	5.80669	6.37204e-09	1.11448e-06		1.26626	85202
ENSMUSG00000041629	Fam104a	113661319	113684155	45.8	protein_coding	family with sequence similarity 104, member A	331.886	0.340217	0.0804427	4.2293	2.34416e-05	0.000918386		1.26595	22836
ENSMUSG00000028896	Rcc1	132331919	132353605	49.42	protein_coding	regulator of chromosome condensation 1	113.721	0.33996	0.111183	3.05768	0.00223059	0.0261078		1.26572	21686
ENSMUSG00000039701	Usp53	122933601	122984447	39.26	protein_coding	ubiquitin specific peptidase 53	840.247	0.339956	0.0939705	3.61768	0.00029725	0.00630249		1.26572	50846
ENSMUSG00000063281	Zfp35	23989632	24005376	43.05	protein_coding	zinc finger protein 35	230.917	0.339927	0.0995547	3.41448	0.000639049	0.0109726		1.26569	15744
ENSMUSG00000032965	Ift57	49699233	49765126	39.29	protein_coding	intraflagellar transport 57	750.444	0.339771	0.133123	2.55232	0.0107009	0.0763277		1.26556	65893
ENSMUSG00000020780	Srp68	116245166	116274217	49.26	protein_coding	signal recognition particle 68	672.831	0.339739	0.083737	4.05721	4.96629e-05	0.00167014		1.26553	29051
ENSMUSG00000058799	Nap1l1	111473192	111498142	41.35	protein_coding	nucleosome assembly protein 1-like 1	3461.34	0.339517	0.0989564	3.43098	0.000601407	0.0105733		1.26533	24950
ENSMUSG00000039449	Prpf18	4622058	4652113	42.78	protein_coding	PRP18 pre-mRNA processing factor 18 homolog (yeast)	763.638	0.339441	0.0629381	5.39326	6.91905e-08	8.82665e-06		1.26527	30055
ENSMUSG00000021374	Nup153	46679905	46727940	37.87	protein_coding	nucleoporin 153	760.923	0.339151	0.0620228	5.46816	4.54726e-08	6.43959e-06		1.26501	48035
ENSMUSG00000027695	Pld1	27938695	28133362	43.59	protein_coding	phospholipase D1	133.99	0.338938	0.102751	3.29864	0.000971531	0.0146023		1.26483	194667
ENSMUSG00000073639	Rab18	6765205	6790231	38.92	protein_coding	RAB18, member RAS oncogene family	1285.65	0.338925	0.114146	2.96922	0.0029856	0.0318491		1.26481	25026
ENSMUSG00000071172	Srsf3	29032673	29043366	40.69	protein_coding	serine/arginine-rich splicing factor 3	1659.82	0.33847	0.0764056	4.42992	9.42702e-06	0.00048344		1.26442	10693
ENSMUSG00000032290	Ptpn9	56994968	57062805	41.69	protein_coding	protein tyrosine phosphatase, non-receptor type 9	293.397	0.33837	0.0787264	4.29804	1.72311e-05	0.00074354		1.26433	67837
ENSMUSG00000025981	Coq10b	55052770	55072702	43.11	protein_coding	coenzyme Q10 homolog B (S. cerevisiae)	288.253	0.338287	0.127017	2.66333	0.00773724	0.0614995		1.26425	19932
ENSMUSG00000073102	Drc1	30281388	30366708	47.98	protein_coding	dynein regulatory complex subunit 1	325.7	0.338107	0.130068	2.59947	0.00933678	0.0703037		1.2641	85320
ENSMUSG00000057060	Slc35f3	126298558	126395482	47.76	protein_coding	solute carrier family 35, member F3	233.383	0.337897	0.114985	2.93862	0.00329679	0.0343965		1.26391	96924
ENSMUSG00000005045	Chd5	152338651	152390194	55.65	protein_coding	chromodomain helicase DNA binding protein 5	4618.82	0.337891	0.102538	3.29526	0.000983302	0.0146934		1.26391	51543
ENSMUSG00000045969	Ing1	11556066	11563250	53.26	protein_coding	inhibitor of growth family, member 1	470.487	0.337756	0.110621	3.05326	0.00226367	0.0264112		1.26379	7184
ENSMUSG00000028842	Ago3	126331704	126429556	39.14	protein_coding	argonaute RISC catalytic subunit 3	1077.81	0.33707	0.0918727	3.66887	0.000243621	0.00545005		1.26319	97852
ENSMUSG00000035378	Shq1	100573081	100671157	43.34	protein_coding	SHQ1 homolog (S. cerevisiae)	54.8395	0.336751	0.134914	2.49604	0.012559	0.0848404		1.26291	98076
ENSMUSG00000026234	Ncl	86344719	86359400	42.35	protein_coding	nucleolin	3441.98	0.336727	0.126218	2.66782	0.00763461	0.0609978		1.26289	14681
ENSMUSG00000033618	Map3k13	21891969	21931877	46.29	protein_coding	mitogen-activated protein kinase kinase kinase 13	445.551	0.336518	0.1101	3.05647	0.00223962	0.0261701		1.26271	39908
ENSMUSG00000019789	Hey2	30832359	30842801	42.03	protein_coding	hairy/enhancer-of-split related with YRPW motif 2	81.9716	0.336364	0.133703	2.51575	0.011878	0.0815973		1.26257	10442
ENSMUSG00000049047	Armcx3	134756595	134761455	45.85	protein_coding	armadillo repeat containing, X-linked 3	999.192	0.336285	0.074345	4.5233	6.08819e-06	0.000355975		1.2625	4860
ENSMUSG00000021361	Tmem14c	41016250	41022575	50.28	protein_coding	transmembrane protein 14C	180.301	0.335909	0.10509	3.1964	0.00139154	0.0188419		1.26217	6325
ENSMUSG00000028274	Rngtt	33310311	33502614	39.17	protein_coding	RNA guanylyltransferase and 5'-phosphatase	607.051	0.335741	0.0564634	5.94617	2.74493e-09	5.64944e-07		1.26203	192303
ENSMUSG00000070697	Utp3	88554483	88556083	50.28	protein_coding	UTP3, small subunit (SSU) processome component, homolog (S. cerevisiae)	374.854	0.335613	0.108498	3.09325	0.00197975	0.0241386		1.26191	1600
ENSMUSG00000031684	Slc10a7	78509335	78734005	43.95	protein_coding	solute carrier family 10 (sodium/bile acid cotransporter family), member 7	53.8712	0.335484	0.137579	2.43848	0.0147494	0.0940325		1.2618	224670
ENSMUSG00000075327	Zbtb2	4367074	4388108	48.59	protein_coding	zinc finger and BTB domain containing 2	202.961	0.335349	0.0909718	3.68629	0.000227545	0.00523455		1.26168	21034
ENSMUSG00000032528	Vipr1	121642716	121672954	52.94	protein_coding	vasoactive intestinal peptide receptor 1	347.82	0.33533	0.122227	2.74351	0.00607867	0.0523545		1.26167	30238
ENSMUSG00000068394	Cep152	125563088	125625113	44.2	protein_coding	centrosomal protein 152	67.4821	0.335219	0.135202	2.4794	0.0131603	0.0873654		1.26157	62025
ENSMUSG00000052915	Msl1	98795516	98807859	48.22	protein_coding	male-specific lethal 1 homolog (Drosophila)	1802.62	0.335167	0.0644863	5.19749	2.02e-07	2.1504e-05		1.26152	12343
ENSMUSG00000021577	Sdha	74322254	74350280	40.58	protein_coding	succinate dehydrogenase complex, subunit A, flavoprotein (Fp)	3181.22	0.334639	0.121901	2.74517	0.00604795	0.0521834		1.26106	28026
ENSMUSG00000033285	Wdr3	100138180	100162407	42.31	protein_coding	WD repeat domain 3	348.32	0.334614	0.0784973	4.26274	2.01934e-05	0.000824616		1.26104	24227
ENSMUSG00000025277	Abhd6	8002902	8056555	45.19	protein_coding	abhydrolase domain containing 6	835.252	0.334334	0.0683374	4.89241	9.96108e-07	7.88509e-05		1.2608	53653
ENSMUSG00000070802	Pnmal2	16944682	16948828	57.37	protein_coding	PNMA-like 2	4200.63	0.334129	0.0940643	3.55214	0.000382118	0.00763582		1.26062	4146
ENSMUSG00000028010	Gar1	129824912	129831396	45.95	protein_coding	GAR1 ribonucleoprotein homolog (yeast)	128.164	0.333816	0.137863	2.42137	0.0154623	0.096708		1.26034	6484
ENSMUSG00000022462	Slc38a2	96687394	96699698	45.78	protein_coding	solute carrier family 38, member 2	1475.99	0.333175	0.131484	2.53396	0.0112781	0.0786663		1.25978	12304
ENSMUSG00000031433	Rbm41	139889511	139998595	38.82	protein_coding	RNA binding motif protein 41	180.304	0.333113	0.102475	3.25068	0.00115128	0.0163823		1.25973	109084
ENSMUSG00000029502	Golga3	110176701	110226470	43.05	protein_coding	golgi autoantigen, golgin subfamily a, 3	1586.3	0.332785	0.0947135	3.51359	0.00044209	0.00848552		1.25944	49769
ENSMUSG00000052783	Grk4	34660379	34755305	40.24	protein_coding	G protein-coupled receptor kinase 4	76.597	0.332753	0.131458	2.53125	0.0113657	0.0790987		1.25941	94926
ENSMUSG00000027893	Ahcyl1	107663118	107696560	40.92	protein_coding	S-adenosylhomocysteine hydrolase-like 1	2328.61	0.332482	0.138342	2.40334	0.016246	0.0999349		1.25918	33442
ENSMUSG00000040463	Mybbp1a	72441355	72451768	52.92	protein_coding	MYB binding protein (P160) 1a	438.468	0.332373	0.0760499	4.37046	1.23985e-05	0.000601835		1.25908	10413
ENSMUSG00000038866	Zcchc2	105990406	106034074	44.08	protein_coding	zinc finger, CCHC domain containing 2	597.85	0.332338	0.113485	2.92848	0.00340622	0.0352166		1.25905	43668
ENSMUSG00000021750	Fam107a	8296274	8318023	48.23	protein_coding	family with sequence similarity 107, member A	4926.61	0.332207	0.133659	2.48548	0.0129378	0.0865284		1.25894	21749
ENSMUSG00000027722	Spata5	37419896	37579096	37.53	protein_coding	spermatogenesis associated 5	276.148	0.331802	0.0939744	3.53077	0.000414347	0.00802493		1.25858	159200
ENSMUSG00000032423	Syncrip	88449731	88482574	37.58	protein_coding	synaptotagmin binding, cytoplasmic RNA interacting protein	2270.84	0.331633	0.0989031	3.35311	0.000799078	0.0128163		1.25844	32843
ENSMUSG00000039987	Phtf2	20758663	20882124	39.6	protein_coding	putative homeodomain transcription factor 2	319.841	0.331541	0.110844	2.99106	0.00278013	0.0302953		1.25836	123461
ENSMUSG00000033960	9430020K01Rik	4634929	4682868	45.68	protein_coding	RIKEN cDNA 9430020K01 gene	2162.52	0.331402	0.102278	3.2402	0.00119446	0.0167312		1.25824	47939
ENSMUSG00000037022	Mmaa	79266424	79294956	43.57	protein_coding	methylmalonic aciduria (cobalamin deficiency) type A	238.338	0.331158	0.0851788	3.8878	0.000101157	0.00291863		1.25802	28532
ENSMUSG00000026436	Elk4	132007607	132032612	45.02	protein_coding	ELK4, member of ETS oncogene family	509.899	0.331106	0.0956614	3.46123	0.000537719	0.00985775		1.25798	25005
ENSMUSG00000090659	Zfp493	67779754	67792512	41.57	protein_coding	zinc finger protein 493	57.821	0.330959	0.129296	2.5597	0.0104762	0.0754249		1.25785	12758
ENSMUSG00000022801	Lrch3	32914100	33015647	41.72	protein_coding	leucine-rich repeats and calponin homology (CH) domain containing 3	485.177	0.330732	0.07581	4.36264	1.28503e-05	0.000614109		1.25765	101547
ENSMUSG00000031819	Emc8	120653914	120668573	51.43	protein_coding	ER membrane protein complex subunit 8	449.615	0.330623	0.105586	3.1313	0.00174036	0.0221104		1.25756	14659
ENSMUSG00000054619	Mettl7a1	100304817	100314348	44.93	protein_coding	methyltransferase like 7A1	239.708	0.330273	0.096015	3.43981	0.000582121	0.0103987		1.25725	9531
ENSMUSG00000025047	Pdcd11	47090766	47131143	47.4	protein_coding	programmed cell death 11	314.945	0.330207	0.0960456	3.43803	0.000585972	0.0104206		1.25719	40377
ENSMUSG00000032458	Copb2	98563721	98588382	41.17	protein_coding	coatomer protein complex, subunit beta 2 (beta prime)	1552.14	0.33018	0.0945755	3.49118	0.000480887	0.00896978		1.25717	24661
ENSMUSG00000031353	Rbbp7	162760402	162779092	40.14	protein_coding	retinoblastoma binding protein 7	2133.44	0.329979	0.121609	2.71345	0.00665861	0.055415		1.257	18690
ENSMUSG00000032601	Prkar2a	108689314	108750436	43.17	protein_coding	protein kinase, cAMP dependent regulatory, type II alpha	1107.45	0.329853	0.06861	4.80765	1.52712e-06	0.000111719		1.25689	61122
ENSMUSG00000073805	Fam196a	134881926	134938430	45.84	protein_coding	family with sequence similarity 196, member A	172.322	0.329212	0.106972	3.07756	0.00208702	0.0250313		1.25633	56504
ENSMUSG00000009630	Ppp2cb	33599621	33619794	44.82	protein_coding	protein phosphatase 2 (formerly 2A), catalytic subunit, beta isoform	820.892	0.329162	0.133461	2.46636	0.0136493	0.0895032		1.25628	20173
ENSMUSG00000027668	Mfn1	32529465	32579239	42.41	protein_coding	mitofusin 1	760.225	0.328523	0.101598	3.23357	0.00122255	0.0170473		1.25573	49774
ENSMUSG00000020246	Hcfc2	82696160	82742428	40.78	protein_coding	host cell factor C2	513.473	0.328397	0.088763	3.69971	0.000215848	0.00504823		1.25562	46268
ENSMUSG00000041912	Tdrkh	94413296	94432633	40.69	protein_coding	tudor and KH domain containing protein	431.182	0.328325	0.100622	3.26296	0.00110256	0.0159206		1.25556	19337
ENSMUSG00000005299	Letm1	33739673	33782817	46.98	protein_coding	leucine zipper-EF-hand containing transmembrane protein 1	1157.07	0.328051	0.0880331	3.72645	0.000194192	0.00467636		1.25532	43144
ENSMUSG00000021111	Papola	105784694	105838944	40.64	protein_coding	poly (A) polymerase alpha	1530.51	0.327944	0.0570634	5.74702	9.08298e-09	1.54071e-06		1.25522	54250
ENSMUSG00000027177	Hipk3	104426481	104494446	40.52	protein_coding	homeodomain interacting protein kinase 3	2657.99	0.327865	0.0856337	3.82869	0.000128827	0.00350102		1.25515	67965
ENSMUSG00000078970	Wdr92	17182107	17233796	41.55	protein_coding	WD repeat domain 92	114.369	0.327538	0.120172	2.72557	0.00641904	0.0540558		1.25487	51689
ENSMUSG00000040852	Plekhh2	84511895	84622142	42.93	protein_coding	pleckstrin homology domain containing, family H (with MyTH4 domain) member 2	152.225	0.327372	0.130603	2.50662	0.0121893	0.0831774		1.25473	110247
ENSMUSG00000036339	Tmem260	48446128	48515135	42.64	protein_coding	transmembrane protein 260	110.819	0.327362	0.112829	2.9014	0.00371498	0.0373545		1.25472	69007
ENSMUSG00000020358	Hnrnpab	51600100	51606847	50.22	protein_coding	heterogeneous nuclear ribonucleoprotein A/B	1466.57	0.327091	0.119244	2.74304	0.00608736	0.0523545		1.25448	6747
ENSMUSG00000016526	Dyrk3	131127455	131138340	46.45	protein_coding	dual-specificity tyrosine-(Y)-phosphorylation regulated kinase 3	110.168	0.326807	0.135305	2.41534	0.0157206	0.0976905		1.25423	10885
ENSMUSG00000047904	Sstr2	113619342	113626028	50.73	protein_coding	somatostatin receptor 2	293.645	0.326714	0.121404	2.69113	0.00712095	0.0582507		1.25415	6686
ENSMUSG00000032649	Colgalt2	152399830	152510695	42.95	protein_coding	collagen beta(1-O)galactosyltransferase 2	177.909	0.326479	0.12082	2.70221	0.0068881	0.0566762		1.25395	110865
ENSMUSG00000027540	Ptpn1	167932057	167979385	50.35	protein_coding	protein tyrosine phosphatase, non-receptor type 1	467.421	0.326205	0.0988074	3.30143	0.000961947	0.014506		1.25371	47328
ENSMUSG00000082229	Nap1l2	103184176	103186640	42.47	protein_coding	nucleosome assembly protein 1-like 2	1276.99	0.325854	0.131216	2.48335	0.0130155	0.0868317		1.25341	2464
ENSMUSG00000025324	Atp10a	58658202	58829426	42.59	protein_coding	ATPase, class V, type 10A	185.795	0.325826	0.120281	2.70888	0.00675103	0.0559361		1.25338	171224
ENSMUSG00000061755	Bod1l	41787542	41844168	41.17	protein_coding	biorientation of chromosomes in cell division 1-like	3707.62	0.325546	0.0765718	4.25152	2.12328e-05	0.000855742		1.25314	56626
ENSMUSG00000032621	Srek1	103741615	103764504	40.12	protein_coding	splicing regulatory glutamine/lysine-rich protein 1	841.869	0.325498	0.0957497	3.39947	0.00067517	0.0113776		1.2531	22889
ENSMUSG00000005370	Msh6	87975050	87990883	45.16	protein_coding	mutS homolog 6 (E. coli)	402.649	0.325332	0.105953	3.07053	0.00213677	0.0253717		1.25295	15833
ENSMUSG00000035047	Kri1	21273457	21287969	50.4	protein_coding	KRI1 homolog (S. cerevisiae)	448.453	0.324909	0.113387	2.86549	0.0041637	0.0404783		1.25259	14512
ENSMUSG00000051469	Zfp191	24009702	24020810	42.24	protein_coding	zinc finger protein 191	804.222	0.324724	0.0756401	4.29301	1.76267e-05	0.000755794		1.25242	11108
ENSMUSG00000037720	Tmem33	67260565	67291461	41.26	protein_coding	transmembrane protein 33	1795.32	0.32456	0.0751533	4.31864	1.56993e-05	0.0007045		1.25228	30896
ENSMUSG00000022372	Sla	66780819	66831829	44.94	protein_coding	src-like adaptor	141.066	0.324553	0.108265	2.99775	0.00271976	0.029914		1.25228	51010
ENSMUSG00000006527	Sfmbt1	30714849	30822713	40.39	protein_coding	Scm-like with four mbt domains 1	787.145	0.323965	0.119101	2.72008	0.00652664	0.054592		1.25177	107864
ENSMUSG00000051495	Irf2bp2	126588296	126593986	54.72	protein_coding	interferon regulatory factor 2 binding protein 2	1061.7	0.323853	0.108597	2.98215	0.00286231	0.0308754		1.25167	5690
ENSMUSG00000060152	Pop5	115235836	115245351	49.08	protein_coding	processing of precursor 5, ribonuclease P/MRP family (S. cerevisiae)	183.099	0.323719	0.117933	2.74494	0.00605228	0.0521916		1.25155	9515
ENSMUSG00000044149	Nkrf	36887540	36902899	39.93	protein_coding	NF-kappaB repressing factor	669.912	0.323424	0.0873441	3.70287	0.000213171	0.00500839		1.2513	15359
ENSMUSG00000028696	Ipp	116507549	116538243	40.32	protein_coding	IAP promoted placental gene	142.126	0.323387	0.11591	2.78999	0.00527104	0.047887		1.25126	30694
ENSMUSG00000079435	Rpl36a	134585654	134588062	44.83	protein_coding	ribosomal protein L36A	728.927	0.322977	0.111603	2.89397	0.00380401	0.0379811		1.25091	2408
ENSMUSG00000022799	Arhgap31	38598340	38713274	45.37	protein_coding	Rho GTPase activating protein 31	321.84	0.322801	0.126638	2.549	0.0108031	0.0767757		1.25076	114934
ENSMUSG00000027189	Trim44	102300119	102407828	39.62	protein_coding	tripartite motif-containing 44	3829.71	0.322325	0.071242	4.52436	6.05779e-06	0.000355544		1.25034	107709
ENSMUSG00000048234	Rnf149	39551296	39577405	41.49	protein_coding	ring finger protein 149	229.026	0.322212	0.126783	2.54146	0.0110391	0.0777449		1.25025	26109
ENSMUSG00000038305	Spats2l	57774162	57948394	43.36	protein_coding	spermatogenesis associated, serine-rich 2-like	287.428	0.321972	0.13291	2.42248	0.0154151	0.0965305		1.25004	174232
ENSMUSG00000027680	Fxr1	34020079	34069342	37.55	protein_coding	fragile X mental retardation gene 1, autosomal homolog	1548.7	0.321834	0.0697761	4.61239	3.98071e-06	0.00024877		1.24992	49263
ENSMUSG00000044098	Rsbn1	103914120	103966636	38.27	protein_coding	rosbin, round spermatid basic protein 1	555.608	0.321653	0.0794146	4.05031	5.11507e-05	0.00171644		1.24976	52516
ENSMUSG00000032115	Hyou1	44379490	44392369	51.04	protein_coding	hypoxia up-regulated 1	1925.17	0.321645	0.0731975	4.39421	1.11178e-05	0.000548287		1.24975	12879
ENSMUSG00000058006	Mdn1	32657119	32775217	41.78	protein_coding	midasin homolog (yeast)	1528.92	0.321213	0.0844565	3.8033	0.000142784	0.0037547		1.24938	118098
ENSMUSG00000063760	Rnf217	31493193	31609184	39.58	protein_coding	ring finger protein 217	830.293	0.321165	0.0908692	3.53437	0.000408752	0.0079766		1.24934	115991
ENSMUSG00000001300	Efnb2	8617434	8660773	44.89	protein_coding	ephrin B2	900.472	0.321155	0.0831352	3.86305	0.00011198	0.00316578		1.24933	43339
ENSMUSG00000029670	Ing3	21949571	21976038	40.69	protein_coding	inhibitor of growth family, member 3	186.592	0.320946	0.105809	3.03325	0.00241939	0.0276635		1.24915	26467
ENSMUSG00000029265	Dr1	108268897	108280526	39.13	protein_coding	down-regulator of transcription 1	554.761	0.320717	0.0644411	4.9769	6.46104e-07	5.5407e-05		1.24895	11629
ENSMUSG00000033623	Pcgf3	108461232	108506976	43.89	protein_coding	polycomb group ring finger 3	1036.59	0.320713	0.0655327	4.89395	9.88338e-07	7.86391e-05		1.24895	45744
ENSMUSG00000056962	Jmjd6	116837432	116843449	52.06	protein_coding	jumonji domain containing 6	308.353	0.320568	0.0920677	3.48188	0.000497912	0.00925996		1.24882	6017
ENSMUSG00000045996	Polr2k	36174010	36177010	38.69	protein_coding	polymerase (RNA) II (DNA directed) polypeptide K	182.176	0.32036	0.118491	2.70366	0.00685811	0.0565199		1.24864	3000
ENSMUSG00000002580	Mien1	98437708	98438991	54.21	protein_coding	migration and invasion enhancer 1	241.035	0.320151	0.099076	3.23137	0.00123198	0.0171169		1.24846	1283
ENSMUSG00000075232	Amd1	40287458	40302188	44.74	protein_coding	S-adenosylmethionine decarboxylase 1	1135.01	0.319759	0.0817999	3.90904	9.26623e-05	0.00276889		1.24812	14730
ENSMUSG00000055204	Ankrd17	90227190	90366185	37.5	protein_coding	ankyrin repeat domain 17	4380.89	0.319541	0.0611103	5.22892	1.70506e-07	1.88002e-05		1.24793	138995
ENSMUSG00000022285	Ywhaz	36770770	36794547	43.65	protein_coding	tyrosine 3-monooxygenase/tryptophan 5-monooxygenase activation protein, zeta polypeptide	7329.19	0.31941	0.0795472	4.01535	5.93577e-05	0.00194532		1.24782	23777
ENSMUSG00000007827	Ankrd26	118501308	118562226	40.87	protein_coding	ankyrin repeat domain 26	708.865	0.319385	0.0984399	3.24447	0.00117671	0.0165708		1.2478	60918
ENSMUSG00000051537	Gm5124	21360865	21364622	50.03	transcribed_processed_pseudogene	predicted pseudogene 5124	474.028	0.319354	0.0712871	4.47982	7.47047e-06	0.000408045		1.24777	3757
ENSMUSG00000003848	Nob1	107412486	107425051	48.72	protein_coding	NIN1/RPN12 binding protein 1 homolog (S. cerevisiae)	107.307	0.319261	0.114199	2.79565	0.00517962	0.0473092		1.24769	12565
ENSMUSG00000025967	Eef1b2	63176825	63180486	45.88	protein_coding	eukaryotic translation elongation factor 1 beta 2	1168.03	0.319192	0.10666	2.99263	0.00276586	0.0302793		1.24763	3661
ENSMUSG00000024975	Pdcd4	53892231	53929861	42.86	protein_coding	programmed cell death 4	1269.03	0.319171	0.129013	2.47395	0.013363	0.0881502		1.24761	37630
ENSMUSG00000039531	Zufsp	33926936	33951212	37.18	protein_coding	zinc finger with UFM1-specific peptidase domain	158.9	0.318993	0.121281	2.63021	0.00853326	0.0659256		1.24746	24276
ENSMUSG00000051721	BC068281	4843303	4856925	45.44	protein_coding	cDNA sequence BC068281	83.7992	0.318717	0.106391	2.99571	0.00273805	0.0300388		1.24722	13622
ENSMUSG00000039988	Ankrd13c	157947414	158006833	39.68	protein_coding	ankyrin repeat domain 13c	946.767	0.318632	0.0795677	4.00453	6.21399e-05	0.00201935		1.24715	59419
ENSMUSG00000049658	Bdp1	100017994	100104070	39.43	protein_coding	B double prime 1, subunit of RNA polymerase III transcription initiation factor IIIB	1846.54	0.318619	0.0825879	3.85794	0.000114348	0.0031976		1.24714	86076
ENSMUSG00000018442	Derl2	71007164	71019841	42.9	protein_coding	Der1-like domain family, member 2	342.89	0.318401	0.081537	3.90499	9.42277e-05	0.00279174		1.24695	12677
ENSMUSG00000035726	Supt16	52160419	52197239	40.95	protein_coding	suppressor of Ty 16	1439.84	0.317438	0.116685	2.72046	0.00651909	0.0545709		1.24612	36820
ENSMUSG00000020720	Psmd12	107479484	107504362	44.34	protein_coding	proteasome (prosome, macropain) 26S subunit, non-ATPase, 12	1001.07	0.317092	0.116171	2.72954	0.00634226	0.0535846		1.24582	24878
ENSMUSG00000020290	Xpo1	23256041	23298249	39.66	protein_coding	exportin 1, CRM1 homolog (yeast)	1979.92	0.317031	0.0733376	4.3229	1.53994e-05	0.000695045		1.24576	42208
ENSMUSG00000031226	Pbdc1	105079756	105117090	39.47	protein_coding	polysaccharide biosynthesis domain containing 1	290.663	0.316212	0.0966242	3.2726	0.00106565	0.0155329		1.24506	37334
ENSMUSG00000046062	Ppp1r15b	133131143	133139783	47.19	protein_coding	protein phosphatase 1, regulatory (inhibitor) subunit 15b	1102.37	0.316189	0.0640512	4.9365	7.95373e-07	6.60074e-05		1.24504	8640
ENSMUSG00000052144	Ppp4r2	100833638	100868717	40.5	protein_coding	protein phosphatase 4, regulatory subunit 2	1144.87	0.31599	0.0693176	4.55859	5.14992e-06	0.000314206		1.24487	35079
ENSMUSG00000020621	Rdh14	10390780	10395562	41	protein_coding	retinol dehydrogenase 14 (all-trans and 9-cis)	262.88	0.315796	0.0824449	3.83039	0.000127939	0.003483		1.2447	4782
ENSMUSG00000090000	Ier3ip1	76930017	76941605	43.82	protein_coding	immediate early response 3 interacting protein 1	520.087	0.315746	0.100665	3.13659	0.00170924	0.0219135		1.24466	11588
ENSMUSG00000044068	Zrsr1	22973215	22976496	42.2	protein_coding	zinc finger (CCCH type), RNA binding motif and serine/arginine rich 1	889.536	0.315453	0.102006	3.0925	0.00198478	0.0241617		1.2444	3281
ENSMUSG00000090935	Synj2bp	81497941	81532911	39.2	protein_coding	synaptojanin 2 binding protein	1122.19	0.31484	0.0580655	5.42215	5.8885e-08	7.74608e-06		1.24387	34970
ENSMUSG00000037712	Fermt2	45458792	45530118	43.57	protein_coding	fermitin family homolog 2 (Drosophila)	782.584	0.314826	0.0960943	3.27622	0.00105206	0.0154408		1.24386	71326
ENSMUSG00000028944	Prkag2	24862744	25100642	49.1	protein_coding	protein kinase, AMP-activated, gamma 2 non-catalytic subunit	516.966	0.314444	0.0877842	3.58201	0.000340966	0.00700686		1.24353	237898
ENSMUSG00000035877	Zhx3	160748708	160872998	42.71	protein_coding	zinc fingers and homeoboxes 3	1348.65	0.314209	0.0617789	5.08602	3.6565e-07	3.37974e-05		1.24333	124290
ENSMUSG00000035623	Rsf1	97579896	97692782	39.57	protein_coding	remodeling and spacing factor 1	2209.37	0.31386	0.0921864	3.40463	0.000662548	0.0112386		1.24303	112886
ENSMUSG00000036572	Upf3b	37091678	37110322	41.08	protein_coding	UPF3 regulator of nonsense transcripts homolog B (yeast)	380.407	0.313847	0.121517	2.58273	0.00980223	0.072223		1.24302	18644
ENSMUSG00000029478	Ncor2	125017153	125179219	55.08	protein_coding	nuclear receptor co-repressor 2	1234.88	0.31325	0.112904	2.77449	0.00552883	0.0493313		1.2425	162066
ENSMUSG00000048787	Dcun1d3	119853163	119896291	42.64	protein_coding	DCN1, defective in cullin neddylation 1, domain containing 3 (S. cerevisiae)	504.129	0.31317	0.0647233	4.8386	1.30759e-06	0.000100418		1.24243	43128
ENSMUSG00000028995	Fam126a	23915276	24030690	41.42	protein_coding	family with sequence similarity 126, member A	329.43	0.312771	0.128511	2.4338	0.0149412	0.0945795		1.24209	115414
ENSMUSG00000052593	Adam17	21323509	21373632	42.5	protein_coding	a disintegrin and metallopeptidase domain 17	283.623	0.312702	0.105287	2.96999	0.00297807	0.0318128		1.24203	50123
ENSMUSG00000024474	Ik	36744656	36757639	42.53	protein_coding	IK cytokine	1395.36	0.312651	0.124887	2.50347	0.0122981	0.083664		1.24199	12983
ENSMUSG00000035109	Shc4	125627447	125724148	44.48	protein_coding	SHC (Src homology 2 domain containing) family, member 4	92.2227	0.312497	0.128328	2.43515	0.0148856	0.0944793		1.24186	96701
ENSMUSG00000029190	D5Ertd579e	36584788	36696024	44.59	protein_coding	DNA segment, Chr 5, ERATO Doi 579, expressed	2973.23	0.311757	0.0726521	4.29109	1.77794e-05	0.00075813		1.24122	111236
ENSMUSG00000026238	Ptma	86526726	86530712	57.14	protein_coding	prothymosin alpha	1696.92	0.31171	0.106644	2.9229	0.00346782	0.0356387		1.24118	3986
ENSMUSG00000020659	Cbll1	31484829	31499616	38.96	protein_coding	Casitas B-lineage lymphoma-like 1	350.304	0.311502	0.0793699	3.92469	8.68416e-05	0.00263357		1.241	14787
ENSMUSG00000087881	Gm22442	69350518	69350661	60.42	snoRNA	predicted gene, 22442	297.724	0.311182	0.118979	2.61544	0.00891125	0.0679951	ScaRNA21	1.24072	143
ENSMUSG00000031078	Cttn	144435733	144471009	51.21	protein_coding	cortactin	1248.64	0.31087	0.0611779	5.0814	3.74658e-07	3.44239e-05		1.24046	35276
ENSMUSG00000027777	Schip1	68064802	68626481	41.69	protein_coding	schwannomin interacting protein 1	794.673	0.310426	0.103158	3.00921	0.00261924	0.0292128		1.24007	561679
ENSMUSG00000031605	Klhl2	64739863	64849818	43.93	protein_coding	kelch-like 2, Mayven	2059.82	0.310011	0.0932505	3.32449	0.000885789	0.0137833		1.23972	109955
ENSMUSG00000040481	Bptf	107033081	107132127	44.84	protein_coding	bromodomain PHD finger transcription factor	3153.76	0.309808	0.0719335	4.30687	1.65584e-05	0.000726458		1.23954	99046
ENSMUSG00000003226	Ranbp2	58446852	58494155	37.23	protein_coding	RAN binding protein 2	6512.93	0.30962	0.0568446	5.44678	5.12902e-08	7.00634e-06		1.23938	47303
ENSMUSG00000031072	Oraov1	144915100	144930748	50.3	protein_coding	oral cancer overexpressed 1	185.875	0.309588	0.110063	2.81283	0.00491078	0.0454726		1.23935	15648
ENSMUSG00000020021	Fgd6	94036001	94145339	44.29	protein_coding	FYVE, RhoGEF and PH domain containing 6	177.586	0.309508	0.104619	2.95841	0.00309226	0.0326485		1.23928	109338
ENSMUSG00000026074	Map4k4	39900913	40026310	45.68	protein_coding	mitogen-activated protein kinase kinase kinase kinase 4	2283.52	0.309351	0.124159	2.49156	0.0127184	0.0855428		1.23915	125397
ENSMUSG00000028282	Casp8ap2	32615451	32653265	39.85	protein_coding	caspase 8 associated protein 2	626.172	0.309306	0.0951526	3.25063	0.00115151	0.0163823		1.23911	37814
ENSMUSG00000045624	Esf1	140119883	140170564	37.59	protein_coding	ESF1, nucleolar pre-rRNA processing protein, homolog (S. cerevisiae)	599.028	0.308777	0.0997588	3.09524	0.00196657	0.0240158		1.23866	50681
ENSMUSG00000014668	Chfr	110135840	110171972	42.91	protein_coding	checkpoint with forkhead and ring finger domains	304.57	0.308506	0.0960382	3.21233	0.00131663	0.0180975		1.23842	36132
ENSMUSG00000027660	Skil	31095058	31122577	41.33	protein_coding	SKI-like	2362.6	0.308362	0.0633145	4.87033	1.11415e-06	8.64219e-05		1.2383	27519
ENSMUSG00000073563	Csnk1g3	53862113	53955684	38.59	protein_coding	casein kinase 1, gamma 3	789.113	0.308145	0.107017	2.87941	0.0039842	0.039172		1.23811	93571
ENSMUSG00000072964	Bhlhb9	135885851	135891081	44.29	protein_coding	basic helix-loop-helix domain containing, class B9	871.826	0.307885	0.094761	3.24907	0.00115785	0.0164119		1.23789	5230
ENSMUSG00000018474	Chd3	69343273	69369406	53.17	protein_coding	chromodomain helicase DNA binding protein 3	10270	0.307724	0.089547	3.43645	0.000589394	0.0104573		1.23775	26133
ENSMUSG00000037935	Smarce1	99209047	99231017	42.47	protein_coding	SWI/SNF related, matrix associated, actin dependent regulator of chromatin, subfamily e, member 1	740.631	0.307632	0.101494	3.03103	0.00243725	0.0277853		1.23767	21970
ENSMUSG00000016619	Nup50	84923428	84942955	46.68	protein_coding	nucleoporin 50	564.725	0.307134	0.0683917	4.49082	7.09501e-06	0.000398093		1.23725	19527
ENSMUSG00000018446	C1qbp	70977836	70983026	49.8	protein_coding	complement component 1, q subcomponent binding protein	148.098	0.306867	0.122927	2.49634	0.0125483	0.0848053		1.23702	5190
ENSMUSG00000020893	Per1	69095217	69109960	55.26	protein_coding	period circadian clock 1	644.482	0.306676	0.119742	2.56113	0.0104332	0.0754249		1.23685	14743
ENSMUSG00000025103	Btbd1	81792075	81829431	39.87	protein_coding	BTB (POZ) domain containing 1	1559.02	0.306096	0.0903398	3.38827	0.00070334	0.0117244		1.23636	37356
ENSMUSG00000036377	C530008M17Rik	76656512	76873554	45.25	protein_coding	RIKEN cDNA C530008M17 gene	1340.9	0.30604	0.117176	2.61179	0.00900698	0.0685223		1.23631	217042
ENSMUSG00000015092	Edf1	25557847	25562082	52.48	protein_coding	endothelial differentiation-related factor 1	720.072	0.305734	0.105572	2.89598	0.00377978	0.0378125		1.23605	4235
ENSMUSG00000025240	Sacm1l	123529882	123592598	39.36	protein_coding	SAC1 (suppressor of actin mutations 1, homolog)-like (S. cerevisiae)	1444.92	0.305643	0.0958017	3.19037	0.00142089	0.0190886		1.23597	62716
ENSMUSG00000051989	Smim11	92301286	92313041	47.84	protein_coding	small integral membrane protein 11	95.8546	0.305616	0.120321	2.54001	0.011085	0.077989		1.23595	11755
ENSMUSG00000043207	Zmpste24	121059237	121098241	42.2	protein_coding	zinc metallopeptidase, STE24	565.405	0.305598	0.0705749	4.33013	1.49023e-05	0.000678561		1.23593	39004
ENSMUSG00000058013	Sep11	93093457	93174958	45.57	protein_coding	septin 11	1704.35	0.305338	0.103017	2.96397	0.00303696	0.0322411		1.23571	81501
ENSMUSG00000022629	Kif21a	90933276	91049948	41.04	protein_coding	kinesin family member 21A	4922.67	0.305287	0.0951232	3.20938	0.00133021	0.0182679		1.23566	116672
ENSMUSG00000041124	Msantd4	4383535	4386861	41.96	protein_coding	Myb/SANT-like DNA-binding domain containing 4 with coiled-coils	1000.59	0.305215	0.0829893	3.67777	0.000235285	0.00533824		1.2356	3326
ENSMUSG00000029145	Eif2b4	31187558	31193430	50.43	protein_coding	eukaryotic translation initiation factor 2B, subunit 4 delta	293.26	0.305164	0.0836293	3.64901	0.00026325	0.00576387		1.23556	5872
ENSMUSG00000055319	Sec23ip	128744870	128784836	43.13	protein_coding	Sec23 interacting protein	698.433	0.305158	0.0723145	4.21987	2.44441e-05	0.000948038		1.23555	39966
ENSMUSG00000020152	Actr2	20062304	20112913	41.05	protein_coding	ARP2 actin-related protein 2	4005.91	0.304649	0.0712126	4.27802	1.88566e-05	0.000777712		1.23512	50609
ENSMUSG00000023967	Mrps18a	46110986	46128910	49.22	protein_coding	mitochondrial ribosomal protein S18A	233.124	0.304585	0.0922386	3.30214	0.000959506	0.0144992		1.23506	17924
ENSMUSG00000023944	Hsp90ab1	45567775	45573271	50.25	protein_coding	heat shock protein 90 alpha (cytosolic), class B member 1	21868.2	0.304492	0.0780374	3.90188	9.54485e-05	0.00282102		1.23498	5496
ENSMUSG00000051391	Ywhag	135908409	135934616	47.89	protein_coding	tyrosine 3-monooxygenase/tryptophan 5-monooxygenase activation protein, gamma polypeptide	8334.06	0.304336	0.0832877	3.65403	0.000258156	0.00566841		1.23485	26207
ENSMUSG00000030614	Tmem126b	90468194	90476001	40.39	protein_coding	transmembrane protein 126B	244.655	0.304102	0.0735616	4.13398	3.56533e-05	0.00130723		1.23465	7807
ENSMUSG00000041328	Pcf11	92643712	92669933	37.17	protein_coding	cleavage and polyadenylation factor subunit homolog (S. cerevisiae)	1352.11	0.303992	0.0867901	3.5026	0.000460732	0.00871552		1.23456	26221
ENSMUSG00000023150	Ivns1abp	151344477	151364422	41.02	protein_coding	influenza virus NS1A binding protein	1211.21	0.303777	0.113323	2.68064	0.00734818	0.0594167		1.23437	19945
ENSMUSG00000013973	Dedd	171329145	171342331	47	protein_coding	death effector domain-containing	165.808	0.303724	0.126345	2.40393	0.0162201	0.0998296		1.23433	13186
ENSMUSG00000040325	Vprbp	106821874	106880992	40.84	protein_coding	Vpr (HIV-1) binding protein	825.441	0.303684	0.0628867	4.82907	1.37174e-06	0.000103289		1.23429	59118
ENSMUSG00000056216	Cebpg	35046422	35056503	43.44	protein_coding	CCAAT/enhancer binding protein (C/EBP), gamma	530.133	0.303617	0.0911157	3.33221	0.00086158	0.0134745		1.23424	10081
ENSMUSG00000067873	Htatsf1	57053583	57067183	41.09	protein_coding	HIV TAT specific factor 1	885.509	0.303587	0.107622	2.82088	0.00478926	0.044773		1.23421	13600
ENSMUSG00000042508	Dmtf1	9118801	9161776	39.18	protein_coding	cyclin D binding myb-like transcription factor 1	1361.39	0.303428	0.0613881	4.94278	7.70174e-07	6.46109e-05		1.23407	42975
ENSMUSG00000037119	D15Ertd621e	58415468	58457801	40.84	protein_coding	DNA segment, Chr 15, ERATO Doi 621, expressed	992.629	0.302832	0.0825761	3.66731	0.000245114	0.00545202		1.23356	42333
ENSMUSG00000027395	Polr1b	129100995	129126594	46.2	protein_coding	polymerase (RNA) I polypeptide B	134.762	0.302688	0.0996892	3.03632	0.00239486	0.0274551		1.23344	25599
ENSMUSG00000034252	Senp6	80066903	80144953	39.18	protein_coding	SUMO/sentrin specific peptidase 6	2385.13	0.302635	0.0757086	3.99737	6.40511e-05	0.00206408		1.2334	78050
ENSMUSG00000032872	Cyb5r4	87022014	87077774	40.35	protein_coding	cytochrome b5 reductase 4	329.875	0.302461	0.095785	3.15771	0.00159014	0.0207485		1.23325	55760
ENSMUSG00000027378	Nphp1	127740732	127788897	44.75	protein_coding	nephronophthisis 1 (juvenile) homolog (human)	151.559	0.302459	0.0992701	3.04683	0.00231268	0.0268007		1.23324	48165
ENSMUSG00000063663	Brwd3	108737016	108834372	35.86	protein_coding	bromodomain and WD repeat domain containing 3	552.996	0.302068	0.091273	3.3095	0.000934634	0.0142559		1.23291	97356
ENSMUSG00000037111	Setd7	51515319	51560879	46.85	protein_coding	SET domain containing (lysine methyltransferase) 7	3824.69	0.301916	0.0941885	3.20544	0.00134856	0.0184284		1.23278	45560
ENSMUSG00000041035	Dpcd	45560615	45579763	50.66	protein_coding	deleted in primary ciliary dyskinesia	283.039	0.301045	0.102503	2.93693	0.00331477	0.034544		1.23204	19148
ENSMUSG00000034931	Dhx8	101732919	101767358	45.25	protein_coding	DEAH (Asp-Glu-Ala-His) box polypeptide 8	685.72	0.3006	0.0696158	4.31799	1.57458e-05	0.0007045		1.23166	34439
ENSMUSG00000006169	Clint1	45852051	45910625	42.84	protein_coding	clathrin interactor 1	863.492	0.300355	0.0709028	4.23615	2.27389e-05	0.000904634		1.23145	58574
ENSMUSG00000053286	Trmt1l	151428542	151458161	40.77	protein_coding	tRNA methyltransferase 1 like	432.212	0.300206	0.0813567	3.69	0.000224258	0.00517757		1.23132	29619
ENSMUSG00000052812	Atad2b	4917404	5044047	39.03	protein_coding	ATPase family, AAA domain containing 2B	354.767	0.300191	0.117271	2.5598	0.0104733	0.0754249		1.23131	126643
ENSMUSG00000028309	Rnf20	49632006	49656887	41.5	protein_coding	ring finger protein 20	1262.41	0.300156	0.0856251	3.50546	0.000455811	0.00863301		1.23128	24881
ENSMUSG00000004360	9330159F19Rik	29211643	29230779	37.14	protein_coding	RIKEN cDNA 9330159F19 gene	1443.1	0.300115	0.080755	3.71636	0.00020211	0.00482189		1.23124	19136
ENSMUSG00000027706	Sec62	30792875	30821263	37.63	protein_coding	SEC62 homolog (S. cerevisiae)	3674.48	0.299827	0.105705	2.83645	0.00456182	0.043068		1.231	28388
ENSMUSG00000022957	Itsn1	91729281	91920597	46.29	protein_coding	intersectin 1 (SH3 domain protein 1A)	2919.66	0.299538	0.0795788	3.76404	0.00016719	0.00418951		1.23075	191316
ENSMUSG00000042650	Alkbh5	60536381	60558512	45.23	protein_coding	alkB, alkylation repair homolog 5 (E. coli)	734.028	0.29943	0.0736513	4.06551	4.79267e-05	0.00162593		1.23066	22131
ENSMUSG00000030733	Sh2b1	126466994	126475130	55.03	protein_coding	SH2B adaptor protein 1	335.664	0.299372	0.0963691	3.10651	0.00189309	0.0234713		1.23061	8136
ENSMUSG00000001150	Mcm3ap	76468971	76515856	45.96	protein_coding	minichromosome maintenance deficient 3 (S. cerevisiae) associated protein	706.903	0.299336	0.0639293	4.68229	2.83692e-06	0.000190395		1.23058	46885
ENSMUSG00000066568	Lsm14a	34344646	34389540	40.39	protein_coding	LSM14 homolog A (SCD6, S. cerevisiae)	752.514	0.299241	0.0796148	3.75861	0.000170858	0.00425362		1.2305	44894
ENSMUSG00000005698	Ctcf	105636568	105682922	41.42	protein_coding	CCCTC-binding factor	1110.49	0.29921	0.0908807	3.29234	0.000993568	0.0148038		1.23047	46354
ENSMUSG00000074884	Serf2	121449195	121458313	50.42	protein_coding	small EDRK-rich factor 2	635.631	0.298911	0.0776568	3.84913	0.000118539	0.00327486		1.23022	9118
ENSMUSG00000029701	Rbm28	29123573	29165006	44.61	protein_coding	RNA binding motif protein 28	601.132	0.298663	0.0985828	3.02957	0.00244905	0.0278992		1.23	41433
ENSMUSG00000046269	Usp27x	7371276	7375830	50.32	protein_coding	ubiquitin specific peptidase 27, X chromosome	293.045	0.298654	0.103386	2.88873	0.00386798	0.0384705		1.23	4554
ENSMUSG00000021520	Uqcrb	66900617	66905378	40.15	protein_coding	ubiquinol-cytochrome c reductase binding protein	808.588	0.298574	0.0987498	3.02354	0.00249833	0.0283144		1.22993	4761
ENSMUSG00000036894	Rap2b	61361638	61368430	49.21	protein_coding	RAP2B, member of RAS oncogene family	860.063	0.298497	0.0978768	3.04973	0.00229049	0.0266636		1.22986	6792
ENSMUSG00000027472	Pdrg1	153008890	153015427	50.37	protein_coding	p53 and DNA damage regulated 1	315.82	0.298423	0.109068	2.73611	0.00621704	0.053108		1.2298	6537
ENSMUSG00000014177	Tvp23b	62879455	62916780	45.05	protein_coding	trans-golgi network vesicle protein 23B	432.79	0.298235	0.0763247	3.90745	9.32768e-05	0.00276889		1.22964	37325
ENSMUSG00000024539	Ptpn2	67665511	67724595	41.08	protein_coding	protein tyrosine phosphatase, non-receptor type 2	297.207	0.298229	0.0857078	3.4796	0.000502164	0.0093278		1.22963	59084
ENSMUSG00000031403	Dkc1	75095854	75109777	41.89	protein_coding	dyskeratosis congenita 1, dyskerin	303.538	0.297687	0.0763298	3.9	9.61908e-05	0.00282819		1.22917	13923
ENSMUSG00000031527	Eri1	35465265	35495533	41.29	protein_coding	exoribonuclease 1	226.433	0.297431	0.0808361	3.67944	0.00023375	0.0053246		1.22895	30268
ENSMUSG00000020783	1200014J11Rik	73047783	73080217	43.58	protein_coding	RIKEN cDNA 1200014J11 gene	349.77	0.297367	0.0808441	3.67827	0.000234821	0.00533824		1.2289	32434
ENSMUSG00000025613	Cct8	87483326	87495873	42.32	protein_coding	chaperonin containing Tcp1, subunit 8 (theta)	2019.31	0.297273	0.0947488	3.13749	0.00170403	0.0218649		1.22882	12547
ENSMUSG00000053510	Nrd1	109000655	109061777	40.55	protein_coding	nardilysin, N-arginine dibasic convertase, NRD convertase 1	1453.89	0.297145	0.0956741	3.1058	0.00189764	0.0234899		1.22871	61122
ENSMUSG00000049804	Armcx4	134686519	134696757	49.5	protein_coding	armadillo repeat containing, X-linked 4	1837.14	0.296938	0.0919544	3.22918	0.00124144	0.0172217		1.22853	10238
ENSMUSG00000039982	Dtx4	12466341	12501996	47.25	protein_coding	deltex 4 homolog (Drosophila)	428.773	0.296905	0.111447	2.66408	0.00771983	0.061433		1.22851	35655
ENSMUSG00000024780	Cdc37l1	28990494	29017569	40.43	protein_coding	cell division cycle 37-like 1	928.001	0.296723	0.089349	3.32094	0.000897143	0.013911		1.22835	27075
ENSMUSG00000058709	Egln2	27158658	27166802	56.16	protein_coding	egl-9 family hypoxia-inducible factor 2	719.625	0.296451	0.0837904	3.538	0.00040317	0.00789763		1.22812	8144
ENSMUSG00000021253	Tgfb3	86056744	86079041	48.98	protein_coding	transforming growth factor, beta 3	167.395	0.296177	0.103162	2.87099	0.00409193	0.0399774		1.22789	22297
ENSMUSG00000026781	Acbd5	23068168	23114510	39.57	protein_coding	acyl-Coenzyme A binding domain containing 5	1385.63	0.296042	0.106536	2.7788	0.005456	0.0489152		1.22777	46342
ENSMUSG00000000001	Gnai3	108107280	108146146	41.65	protein_coding	guanine nucleotide binding protein (G protein), alpha inhibiting 3	651.202	0.295972	0.103657	2.8553	0.00429967	0.0413518		1.22771	38866
ENSMUSG00000037234	Hook3	26021421	26119224	40.12	protein_coding	hook homolog 3 (Drosophila)	2693.77	0.295484	0.0853968	3.46013	0.000539907	0.00987779		1.2273	97803
ENSMUSG00000020409	Slu7	43433744	43447981	44.93	protein_coding	SLU7 splicing factor homolog (S. cerevisiae)	1552.09	0.295432	0.0981078	3.0113	0.0026013	0.029118		1.22725	14237
ENSMUSG00000031153	Gripap1	7789765	7820567	46.37	protein_coding	GRIP1 associated protein 1	1615.4	0.295374	0.0816701	3.61667	0.000298412	0.00630998		1.2272	30802
ENSMUSG00000021113	Snapc1	73964530	73984820	42.78	protein_coding	small nuclear RNA activating complex, polypeptide 1	372.321	0.29518	0.0979144	3.01468	0.00257251	0.0289216		1.22704	20290
ENSMUSG00000035900	Gramd4	86057695	86137634	52.63	protein_coding	GRAM domain containing 4	448.517	0.294758	0.0743392	3.96504	7.33851e-05	0.00231178		1.22668	79939
ENSMUSG00000035569	Ankrd11	122883337	122974793	45.75	protein_coding	ankyrin repeat domain 11	5306.22	0.294755	0.0771193	3.82207	0.000132338	0.00355263		1.22668	91456
ENSMUSG00000032536	Trak1	121366958	121474916	50.18	protein_coding	trafficking protein, kinesin binding 1	1892.84	0.294707	0.0833947	3.53388	0.000409513	0.00798138		1.22664	107958
ENSMUSG00000053931	Cnn3	121426541	121458205	47.63	protein_coding	calponin 3, acidic	706.911	0.294683	0.0993055	2.96743	0.00300297	0.0319682		1.22662	31664
ENSMUSG00000021670	Hmgcr	96648967	96670936	44.12	protein_coding	3-hydroxy-3-methylglutaryl-Coenzyme A reductase	1925.51	0.29452	0.087438	3.36833	0.000756254	0.0123923		1.22648	21969
ENSMUSG00000032264	Zw10	49055581	49078772	43.56	protein_coding	zw10 kinetochore protein	149.08	0.294464	0.114312	2.57597	0.00999594	0.073092		1.22643	23191
ENSMUSG00000032402	Smad3	63646767	63757994	50.14	protein_coding	SMAD family member 3	994.32	0.294275	0.0795951	3.69715	0.000218037	0.00507636		1.22627	111227
ENSMUSG00000031847	1700030J22Rik	116969599	116978943	49.38	protein_coding	RIKEN cDNA 1700030J22 gene	124.691	0.294041	0.0976813	3.01021	0.0026107	0.0291809		1.22607	9344
ENSMUSG00000039536	Stau1	166947549	166996299	45.63	protein_coding	staufen (RNA binding protein) homolog 1 (Drosophila)	604.816	0.294003	0.0866364	3.39352	0.000690002	0.0115645		1.22604	48750
ENSMUSG00000021890	Eaf1	31495079	31509858	44.86	protein_coding	ELL associated factor 1	165.243	0.293956	0.0955582	3.0762	0.00209654	0.0251064		1.226	14779
ENSMUSG00000048578	Mlec	115142981	115158179	49.97	protein_coding	malectin	1929.76	0.293772	0.0903004	3.25328	0.00114081	0.0163018		1.22584	15198
ENSMUSG00000047466	8030462N17Rik	77633281	77714010	39.9	protein_coding	RIKEN cDNA 8030462N17 gene	684.411	0.293713	0.0875732	3.35392	0.000796768	0.0128114		1.22579	80729
ENSMUSG00000029920	Smarcad1	65042667	65116050	38.58	protein_coding	SWI/SNF-related, matrix-associated actin-dependent regulator of chromatin, subfamily a, containing DEAD/H box 1	658.181	0.293056	0.0712394	4.11368	3.89399e-05	0.00138817		1.22523	73383
ENSMUSG00000039148	Sart1	5377523	5388703	53.61	protein_coding	squamous cell carcinoma antigen recognized by T cells 1	711.312	0.29303	0.087521	3.34812	0.000813624	0.0129609		1.22521	11180
ENSMUSG00000036959	Bcorl1	48341358	48408049	47.42	protein_coding	BCL6 co-repressor-like 1	344.948	0.29274	0.0945327	3.09671	0.00195682	0.0239535		1.22496	66691
ENSMUSG00000027508	Pag1	9687479	9833679	44.66	protein_coding	phosphoprotein associated with glycosphingolipid microdomains 1	335.538	0.292716	0.0847574	3.45357	0.000553221	0.0100112		1.22494	146200
ENSMUSG00000035575	Utp6	79932321	79962390	43.67	protein_coding	UTP6, small subunit (SSU) processome component, homolog (yeast)	743.961	0.292686	0.0797339	3.67078	0.000241807	0.00543309		1.22492	30069
ENSMUSG00000038393	Txnip	96557957	96561883	46.65	protein_coding	thioredoxin interacting protein	364.172	0.292582	0.113241	2.5837	0.00977467	0.0721232		1.22483	3926
ENSMUSG00000035049	Rrp12	41862852	41896153	49.39	protein_coding	ribosomal RNA processing 12 homolog (S. cerevisiae)	447.749	0.292563	0.0852817	3.43054	0.000602372	0.0105782		1.22481	33301
ENSMUSG00000024999	Noc3l	38788128	38819237	42.89	protein_coding	nucleolar complex associated 3 homolog (S. cerevisiae)	312.384	0.292443	0.0688082	4.25012	2.1366e-05	0.000856636		1.22471	31109
ENSMUSG00000010095	Slc3a2	8706882	8723369	46.65	protein_coding	solute carrier family 3 (activators of dibasic and neutral amino acid transport), member 2	1132.46	0.292429	0.10233	2.85772	0.00426697	0.0410885		1.2247	16487
ENSMUSG00000090862	Rps13	116331507	116334190	46.91	protein_coding	ribosomal protein S13	306.434	0.292009	0.112	2.60723	0.0091279	0.0692375		1.22434	2683
ENSMUSG00000028902	Sf3a3	124714776	124732460	47.07	protein_coding	splicing factor 3a, subunit 3	392.942	0.291936	0.0882398	3.30843	0.000938198	0.014268		1.22428	17684
ENSMUSG00000035529	Prdm4	85891970	85916945	43.27	protein_coding	PR domain containing 4	462.63	0.29175	0.0792133	3.68309	0.000230426	0.00529294		1.22412	24975
ENSMUSG00000029147	Ppm1g	31202668	31220545	42.92	protein_coding	protein phosphatase 1G (formerly 2C), magnesium-dependent, gamma isoform	727.031	0.291336	0.0979135	2.97544	0.0029257	0.0314147		1.22377	17877
ENSMUSG00000063888	Rpl7l1	46773907	46782656	47.51	protein_coding	ribosomal protein L7-like 1	392.057	0.291302	0.0745422	3.90787	9.31122e-05	0.00276889		1.22374	8749
ENSMUSG00000029672	Fam3c	22306520	22356243	42.23	protein_coding	family with sequence similarity 3, member C	1039.1	0.291291	0.119884	2.42978	0.0151081	0.0953036		1.22373	49723
ENSMUSG00000053289	Ddx10	53098454	53248112	37.52	protein_coding	DEAD (Asp-Glu-Ala-Asp) box polypeptide 10	546.19	0.291267	0.0925991	3.14546	0.00165825	0.0214199		1.22371	149658
ENSMUSG00000039473	Ubn1	5050068	5086285	42.81	protein_coding	ubinuclein 1	1048.45	0.291246	0.0533769	5.45641	4.85855e-08	6.75644e-06		1.2237	36217
ENSMUSG00000042426	Dhx29	112927730	112969431	43.79	protein_coding	DEAH (Asp-Glu-Ala-His) box polypeptide 29	475.914	0.291025	0.0649327	4.48195	7.39624e-06	0.000406293		1.22351	41701
ENSMUSG00000078676	Casc3	98804905	98833814	44.7	protein_coding	cancer susceptibility candidate 3	427.791	0.290974	0.104966	2.77207	0.00557004	0.0496128		1.22347	28909
ENSMUSG00000020607	Fam84a	14147599	14152038	52.16	protein_coding	family with sequence similarity 84, member A	988.433	0.290897	0.0957056	3.0395	0.00236973	0.0273183		1.2234	4439
ENSMUSG00000008859	Rala	17880575	17944239	40.9	protein_coding	v-ral simian leukemia viral oncogene homolog A (ras related)	1028.76	0.290644	0.0772673	3.76154	0.000168869	0.0042179		1.22319	63664
ENSMUSG00000060181	Slc35e3	117733679	117746358	48.38	protein_coding	solute carrier family 35, member E3	217.843	0.290636	0.112289	2.58828	0.00964573	0.0717549		1.22318	12679
ENSMUSG00000049717	Lig4	9970020	9977686	42.22	protein_coding	ligase IV, DNA, ATP-dependent	185.93	0.290633	0.0999515	2.90775	0.00364045	0.0369454		1.22318	7666
ENSMUSG00000022718	Dgcr8	18253948	18289249	43.76	protein_coding	DiGeorge syndrome critical region gene 8	213.098	0.29053	0.104639	2.77649	0.00549486	0.0491988		1.22309	35301
ENSMUSG00000020368	Canx	50293961	50325673	39.86	protein_coding	calnexin	7856.15	0.29051	0.0550618	5.27608	1.31977e-07	1.52029e-05		1.22307	31712
ENSMUSG00000029403	Cdkl2	92006074	92043042	40.52	protein_coding	cyclin-dependent kinase-like 2 (CDC2-related kinase)	575.364	0.290429	0.10066	2.88524	0.00391114	0.0387499		1.223	36968
ENSMUSG00000036053	Fmnl2	52857860	53134202	42.79	protein_coding	formin-like 2	896.842	0.29029	0.0760442	3.81738	0.000134877	0.00358958		1.22289	276342
ENSMUSG00000024528	Srfbp1	52465693	52490738	40.77	protein_coding	serum response factor binding protein 1	356.973	0.290277	0.0865484	3.35393	0.000796739	0.0128114		1.22287	25045
ENSMUSG00000028899	Taf12	132274375	132295766	45.19	protein_coding	TAF12 RNA polymerase II, TATA box binding protein (TBP)-associated factor	190.328	0.29021	0.0827863	3.50553	0.0004557	0.00863301		1.22282	21391
ENSMUSG00000005533	Igf1r	67952859	68226780	46.28	protein_coding	insulin-like growth factor I receptor	716.294	0.289442	0.0948291	3.05224	0.00227137	0.026481		1.22217	273921
ENSMUSG00000020163	Uqcr11	80402997	80406830	52.35	protein_coding	ubiquinol-cytochrome c reductase, complex III subunit XI	893.669	0.288992	0.106142	2.72269	0.00647521	0.0542753		1.22179	3833
ENSMUSG00000022892	App	84954440	85173707	42.79	protein_coding	amyloid beta (A4) precursor protein	11700.6	0.288729	0.119381	2.41856	0.015582	0.0970635		1.22156	219267
ENSMUSG00000031333	Abcb7	104280657	104413856	37.64	protein_coding	ATP-binding cassette, sub-family B (MDR/TAP), member 7	709.206	0.288544	0.0960656	3.00361	0.00266799	0.0295855		1.22141	133199
ENSMUSG00000022283	Pabpc1	36595661	36608973	41.34	protein_coding	poly(A) binding protein, cytoplasmic 1	1531.1	0.288496	0.0832532	3.46529	0.000529662	0.00972159		1.22137	13312
ENSMUSG00000039738	Slx4	3979105	4003770	48.54	protein_coding	SLX4 structure-specific endonuclease subunit homolog (S. cerevisiae)	430.568	0.288398	0.102617	2.81042	0.00494763	0.0457315		1.22128	24665
ENSMUSG00000011960	Ccnt1	98538689	98570923	42.91	protein_coding	cyclin T1	848.005	0.288397	0.0544246	5.29902	1.16424e-07	1.41977e-05		1.22128	32234
ENSMUSG00000027195	Hsd17b12	94032689	94157964	40.67	protein_coding	hydroxysteroid (17-beta) dehydrogenase 12	568.274	0.288298	0.0953042	3.02503	0.00248612	0.0282175		1.2212	125275
ENSMUSG00000040407	Akap9	3928054	4080209	41.18	protein_coding	A kinase (PRKA) anchor protein (yotiao) 9	4529.23	0.287877	0.101175	2.84535	0.00443628	0.0423491		1.22084	152155
ENSMUSG00000039523	Cep104	153975194	154008732	51.65	protein_coding	centrosomal protein 104	274.249	0.2878	0.103871	2.77073	0.00559306	0.0497605		1.22078	33538
ENSMUSG00000029640	Usp12	146734809	146795006	46.94	protein_coding	ubiquitin specific peptidase 12	996.727	0.287136	0.0996514	2.8814	0.00395908	0.0390076		1.22022	60197
ENSMUSG00000020807	4933427D14Rik	72153929	72207459	44.11	protein_coding	RIKEN cDNA 4933427D14 gene	535.557	0.287034	0.0771272	3.72157	0.000197991	0.00476043		1.22013	53530
ENSMUSG00000004865	Srpk1	28587648	28622521	46.47	protein_coding	serine/arginine-rich protein specific kinase 1	974.951	0.286702	0.0849666	3.37429	0.000740054	0.0121855		1.21985	34873
ENSMUSG00000001627	Ifrd1	40201567	40248504	41.54	protein_coding	interferon-related developmental regulator 1	628.813	0.286622	0.0836248	3.42748	0.000609219	0.0106499		1.21978	46937
ENSMUSG00000079215	Zfp664	124862691	124902693	47.81	protein_coding	zinc finger protein 664	1165.31	0.286567	0.0751909	3.81119	0.000138299	0.00365732		1.21973	40002
ENSMUSG00000037364	Srrt	137295704	137307674	51.37	protein_coding	serrate RNA effector molecule homolog (Arabidopsis)	1130.48	0.286484	0.08065	3.55219	0.000382034	0.00763582		1.21966	11970
ENSMUSG00000028851	Nudc	133532542	133545996	51.83	protein_coding	nuclear distribution gene C homolog (Aspergillus)	1690.55	0.286388	0.109602	2.61297	0.00897586	0.0683866		1.21958	13454
ENSMUSG00000027439	Gzf1	148681023	148692949	45.43	protein_coding	GDNF-inducible zinc finger protein 1	791.094	0.286325	0.0638111	4.48707	7.22097e-06	0.000399733		1.21953	11926
ENSMUSG00000009549	Srp14	118475850	118479711	49.69	protein_coding	signal recognition particle 14	966.382	0.286083	0.104661	2.73342	0.00626807	0.0532493		1.21933	3861
ENSMUSG00000025931	Paqr8	20890606	20939650	44.42	protein_coding	progestin and adipoQ receptor family member VIII	1807.14	0.286073	0.0834578	3.42775	0.000608602	0.0106499		1.21932	49044
ENSMUSG00000030554	Synm	67730161	67759742	48.25	protein_coding	synemin, intermediate filament protein	1108.39	0.285661	0.104472	2.73433	0.00625076	0.0532458		1.21897	29581
ENSMUSG00000026024	Als2	59162926	59237231	42.87	protein_coding	amyotrophic lateral sclerosis 2 (juvenile)	800.612	0.285653	0.0574583	4.97148	6.64435e-07	5.66642e-05		1.21896	74305
ENSMUSG00000036779	Papd5	88199213	88259722	43.81	protein_coding	PAP associated domain containing 5	1016.93	0.285101	0.0867566	3.28622	0.00101542	0.0150134		1.2185	60509
ENSMUSG00000059486	Kbtbd2	56777524	56797813	41.21	protein_coding	kelch repeat and BTB (POZ) domain containing 2	1044.01	0.285101	0.0706725	4.03411	5.48088e-05	0.00181942		1.2185	20289
ENSMUSG00000030870	Ubfd1	122067175	122082194	44.91	protein_coding	ubiquitin family domain containing 1	825.697	0.284405	0.0613997	4.63204	3.62086e-06	0.000233856		1.21791	15019
ENSMUSG00000037896	Rcor1	111039351	111115901	44.19	protein_coding	REST corepressor 1	295.119	0.284299	0.0828068	3.43328	0.000596328	0.01052		1.21782	76550
ENSMUSG00000051166	Eml5	98786604	98901484	38.93	protein_coding	echinoderm microtubule associated protein like 5	1203.35	0.284052	0.118085	2.40549	0.0161508	0.0995224		1.21761	114880
ENSMUSG00000020130	Tbc1d15	115197877	115251493	41.8	protein_coding	TBC1 domain family, member 15	352.319	0.283825	0.117583	2.41382	0.0157863	0.0980006		1.21742	53616
ENSMUSG00000041168	Lonp1	56614301	56626903	52.41	protein_coding	lon peptidase 1, mitochondrial	762.833	0.283659	0.064971	4.36594	1.26577e-05	0.000609948		1.21728	12602
ENSMUSG00000024067	Dpy30	74299474	74323944	44.55	protein_coding	dpy-30 homolog (C. elegans)	164.183	0.28351	0.115477	2.45513	0.0140832	0.0913391		1.21715	24470
ENSMUSG00000024290	Rock1	10064401	10181792	36.62	protein_coding	Rho-associated coiled-coil containing protein kinase 1	813.473	0.283465	0.108751	2.60655	0.00914597	0.0692724		1.21711	117391
ENSMUSG00000030007	Cct7	85451505	85468477	45.97	protein_coding	chaperonin containing Tcp1, subunit 7 (eta)	1629.43	0.283219	0.0759689	3.7281	0.000192932	0.00465328		1.21691	16972
ENSMUSG00000028436	Dcaf12	41291300	41314889	45.68	protein_coding	DDB1 and CUL4 associated factor 12	370.847	0.282991	0.0715662	3.95426	7.67725e-05	0.00239406		1.21671	23589
ENSMUSG00000090053	Palm2	57434247	57712016	44.37	protein_coding	paralemmin 2	243.824	0.282862	0.105722	2.67553	0.00746112	0.0600205		1.21661	277769
ENSMUSG00000021057	Akap5	76324891	76334153	44.78	protein_coding	A kinase (PRKA) anchor protein 5	3964.76	0.282798	0.0854754	3.30853	0.00093787	0.014268		1.21655	9262
ENSMUSG00000027088	Phospho2	69789623	69800005	40.64	protein_coding	phosphatase, orphan 2	369.017	0.282362	0.07885	3.581	0.000342285	0.00701202		1.21618	10382
ENSMUSG00000001630	Stk38l	146724995	146778812	42.34	protein_coding	serine/threonine kinase 38 like	393.926	0.282216	0.0993898	2.83948	0.00451864	0.0428175		1.21606	53817
ENSMUSG00000019802	Sec63	42761496	42832514	39.23	protein_coding	SEC63-like (S. cerevisiae)	1296.48	0.281911	0.10654	2.64605	0.00814377	0.0638108		1.2158	71018
ENSMUSG00000054051	Ercc6	32513521	32580989	43.47	protein_coding	excision repair cross-complementing rodent repair deficiency, complementation group 6	796.534	0.281884	0.0691977	4.07361	4.62907e-05	0.00158435		1.21578	67468
ENSMUSG00000028060	2810403A07Rik	88685794	88712933	41.5	protein_coding	RIKEN cDNA 2810403A07 gene	681.341	0.281846	0.0774247	3.64026	0.000272367	0.00590487		1.21575	27139
ENSMUSG00000038564	Ift172	31253280	31291114	47.68	protein_coding	intraflagellar transport 172	721.936	0.281732	0.0726207	3.8795	0.000104672	0.0030032		1.21565	37834
ENSMUSG00000025272	Tro	150645304	150657583	49.19	protein_coding	trophinin	4516.1	0.281559	0.106306	2.64858	0.00808309	0.0634319		1.21551	12279
ENSMUSG00000049076	Acap2	31092413	31201238	43.18	protein_coding	ArfGAP with coiled-coil, ankyrin repeat and PH domains 2	2286.99	0.28121	0.0765634	3.6729	0.000239818	0.00540413		1.21521	108825
ENSMUSG00000068882	Ssb	69861562	69871846	37.88	protein_coding	Sjogren syndrome antigen B	2033.14	0.281208	0.102519	2.74298	0.00608844	0.0523545		1.21521	10284
ENSMUSG00000020400	Tnip1	54910785	54962917	50.44	protein_coding	TNFAIP3 interacting protein 1	234.975	0.281137	0.105293	2.67004	0.00758423	0.0607211		1.21515	52132
ENSMUSG00000102976	Zc3h11a	133619862	133661380	41.85	protein_coding	zinc finger CCCH type containing 11A	167.133	0.280538	0.105369	2.66244	0.00775767	0.0615667		1.21465	41518
ENSMUSG00000022280	Rnf19a	36239934	36283147	40.33	protein_coding	ring finger protein 19A	656.493	0.280427	0.0847706	3.30807	0.000939426	0.0142726		1.21455	43213
ENSMUSG00000038611	Phrf1	141228784	141262750	47.1	protein_coding	PHD and ring finger domains 1	717.256	0.280412	0.0652444	4.29787	1.72446e-05	0.00074354		1.21454	33966
ENSMUSG00000020982	Nemf	69311544	69357176	39.55	protein_coding	nuclear export mediator factor	1254.08	0.280049	0.0727099	3.8516	0.000117348	0.00325789		1.21424	45632
ENSMUSG00000042331	Specc1	61956779	62223013	43.36	protein_coding	sperm antigen with calponin homology and coiled-coil domains 1	1386	0.279822	0.0875211	3.19719	0.00138771	0.0188231		1.21405	266234
ENSMUSG00000102252	Snrpn	59982495	60140219	37.11	protein_coding	small nuclear ribonucleoprotein N	8109.12	0.279742	0.11172	2.50395	0.0122814	0.083624		1.21398	157724
ENSMUSG00000040389	Wdr47	108591279	108645719	40.17	protein_coding	WD repeat domain 47	1389.07	0.279729	0.0936426	2.9872	0.00281543	0.0304976		1.21397	54440
ENSMUSG00000034801	Sos2	69583762	69681852	40.65	protein_coding	son of sevenless homolog 2 (Drosophila)	841.761	0.279115	0.0828962	3.36704	0.000759801	0.012424		1.21345	98090
ENSMUSG00000025582	Nptx1	119538719	119547753	55.63	protein_coding	neuronal pentraxin 1	4600.74	0.279038	0.0966424	2.88732	0.00388535	0.0385935		1.21339	9034
ENSMUSG00000024613	Tcof1	60813755	60848971	52.3	protein_coding	Treacher Collins Franceschetti syndrome 1, homolog	270.732	0.278903	0.114392	2.43814	0.0147631	0.0940501		1.21327	35216
ENSMUSG00000046675	Tmem251	102743760	102747561	42.82	protein_coding	transmembrane protein 251	101.196	0.278595	0.108304	2.57234	0.0101014	0.0736319		1.21301	3801
ENSMUSG00000056076	Eif3b	140419305	140443358	50.31	protein_coding	eukaryotic translation initiation factor 3, subunit B	656.586	0.278429	0.0990118	2.81208	0.00492217	0.0455508		1.21287	24053
ENSMUSG00000031668	Eif2ak3	70844515	70905245	44.04	protein_coding	eukaryotic translation initiation factor 2 alpha kinase 3	441.245	0.278307	0.0645939	4.30857	1.64312e-05	0.000726458		1.21277	60730
ENSMUSG00000060126	Tpt1	75845093	75848525	49.96	protein_coding	tumor protein, translationally-controlled 1	1492.06	0.278238	0.0946243	2.94045	0.0032774	0.0342518		1.21271	3432
ENSMUSG00000023827	Agpat4	12118704	12219645	47.1	protein_coding	1-acylglycerol-3-phosphate O-acyltransferase 4 (lysophosphatidic acid acyltransferase, delta)	459.782	0.278094	0.08595	3.23553	0.00121418	0.0169838		1.21259	100941
ENSMUSG00000038546	Ranbp9	43402673	43480973	39.92	protein_coding	RAN binding protein 9	1074.22	0.277986	0.0646245	4.30156	1.696e-05	0.000737448		1.2125	78300
ENSMUSG00000027952	Pmvk	89459118	89469013	49.06	protein_coding	phosphomevalonate kinase	540.146	0.277702	0.0910742	3.04919	0.0022946	0.0266748		1.21226	9895
ENSMUSG00000026617	Bpnt1	185332149	185357777	45.24	protein_coding	bisphosphate 3'-nucleotidase 1	685.106	0.277684	0.0664659	4.17783	2.94299e-05	0.001108		1.21225	25628
ENSMUSG00000008435	Rdh13	4424770	4445649	46.95	protein_coding	retinol dehydrogenase 13 (all-trans and 9-cis)	328.965	0.27743	0.0769643	3.60465	0.000312572	0.00656444		1.21203	20879
ENSMUSG00000038845	Phb	95666957	95680773	50.03	protein_coding	prohibitin	448.548	0.277141	0.0948971	2.92043	0.00349543	0.035827		1.21179	13816
ENSMUSG00000026918	Brd3	27445579	27507662	50.08	protein_coding	bromodomain containing 3	720.522	0.276732	0.0833619	3.31965	0.000901306	0.0139463		1.21145	62083
ENSMUSG00000058569	Tmed9	55593135	55597663	49.33	protein_coding	transmembrane emp24 protein transport domain containing 9	922.463	0.276684	0.0763133	3.62563	0.000288257	0.00617135		1.21141	4528
ENSMUSG00000040225	Prrc2c	162670725	162740556	38.89	protein_coding	proline-rich coiled-coil 2C	6374.95	0.276665	0.0672906	4.11149	3.9311e-05	0.00139662		1.21139	69831
ENSMUSG00000040111	Gramd1b	40293233	40531383	45.7	protein_coding	GRAM domain containing 1B	2647.82	0.276627	0.0760638	3.63678	0.000276068	0.00595998		1.21136	238150
ENSMUSG00000048332	Lhfp	53041528	53261679	42.92	protein_coding	lipoma HMGIC fusion partner	287.917	0.276625	0.111575	2.47928	0.0131648	0.0873654		1.21136	220151
ENSMUSG00000070284	Gmppb	108049242	108052801	54.8	protein_coding	GDP-mannose pyrophosphorylase B	108.876	0.276541	0.112561	2.45682	0.0140172	0.0909879		1.21129	3559
ENSMUSG00000060935	Tmem263	85102627	85117747	38.49	protein_coding	transmembrane protein 263	595.64	0.276452	0.0846809	3.26463	0.00109608	0.0158566		1.21121	15120
ENSMUSG00000018363	Smurf2	106820066	106920715	39.84	protein_coding	SMAD specific E3 ubiquitin protein ligase 2	600.825	0.276413	0.0752684	3.67237	0.000240313	0.00540738		1.21118	100649
ENSMUSG00000035632	Cnot3	3645290	3661108	51.01	protein_coding	CCR4-NOT transcription complex, subunit 3	243.626	0.276402	0.100212	2.75818	0.00581237	0.0510791		1.21117	15818
ENSMUSG00000004768	Rab23	33719887	33742564	46	protein_coding	RAB23, member RAS oncogene family	298.928	0.276301	0.0740235	3.73262	0.000189502	0.0045993		1.21109	22677
ENSMUSG00000031343	Gabra3	72432681	72656848	37.94	protein_coding	gamma-aminobutyric acid (GABA) A receptor, subunit alpha 3	1655.08	0.275902	0.104428	2.64204	0.0082408	0.0644076		1.21075	224167
ENSMUSG00000021451	Sema4d	51701246	51793747	50.35	protein_coding	sema domain, immunoglobulin domain (Ig), transmembrane domain (TM) and short cytoplasmic domain, (semaphorin) 4D	364.642	0.275824	0.103703	2.65974	0.00782016	0.0618559		1.21069	92501
ENSMUSG00000024827	Gldc	30098449	30175418	44.72	protein_coding	glycine decarboxylase	268.629	0.275075	0.102676	2.67907	0.00738279	0.0596341		1.21006	76969
ENSMUSG00000066232	Ipo7	110018425	110055114	38.31	protein_coding	importin 7	2023.19	0.275011	0.0634809	4.33218	1.47638e-05	0.000676245		1.21	36689
ENSMUSG00000021244	Ylpm1	84996321	85070515	40.18	protein_coding	YLP motif containing 1	2813.86	0.274985	0.0775459	3.54609	0.000390987	0.00770789		1.20998	74194
ENSMUSG00000015143	Actn1	80167542	80260371	49.36	protein_coding	actinin, alpha 1	708.474	0.274934	0.0996489	2.75902	0.00579743	0.0510791		1.20994	92829
ENSMUSG00000042359	Osbpl6	76406508	76600647	42.48	protein_coding	oxysterol binding protein-like 6	757.165	0.274857	0.0979291	2.80669	0.00500529	0.0460946		1.20987	194139
ENSMUSG00000062203	Gspt1	11219292	11254270	40.72	protein_coding	G1 to S phase transition 1	1078.67	0.27454	0.0797606	3.44206	0.000577312	0.0103726		1.20961	34978
ENSMUSG00000040276	Pacsin1	27655509	27711106	51.66	protein_coding	protein kinase C and casein kinase substrate in neurons 1	4102.83	0.274385	0.0816297	3.36134	0.000775645	0.0126156		1.20948	55597
ENSMUSG00000090112	Shprh	11149427	11217595	38.08	protein_coding	SNF2 histone linker PHD RING helicase	1091.67	0.273971	0.0640037	4.28054	1.86441e-05	0.000775717		1.20913	68168
ENSMUSG00000031357	Syap1	162857057	162888447	42.57	protein_coding	synapse associated protein 1	306.357	0.273782	0.0977316	2.80137	0.00508863	0.0465884		1.20897	31390
ENSMUSG00000046378	Asphd1	126945567	126949582	52.12	protein_coding	aspartate beta-hydroxylase domain containing 1	158.012	0.273595	0.1137	2.40629	0.0161156	0.0993847		1.20882	4015
ENSMUSG00000026430	Rassf5	131176410	131245258	49.55	protein_coding	Ras association (RalGDS/AF-6) domain family member 5	143.877	0.273378	0.0981618	2.78498	0.00535315	0.0483224		1.20863	68848
ENSMUSG00000081272	Gm13509	49308155	49309462	51.99	processed_pseudogene	predicted gene 13509	195.874	0.273305	0.100383	2.72262	0.00647675	0.0542753		1.20857	1307
ENSMUSG00000030201	Lrp6	134446476	134566965	40.84	protein_coding	low density lipoprotein receptor-related protein 6	1388.71	0.273006	0.0867179	3.14821	0.00164276	0.0212732		1.20832	120489
ENSMUSG00000061983	Rps12	23785211	23787195	46.95	protein_coding	ribosomal protein S12	956.321	0.272928	0.111224	2.45386	0.0141332	0.0915872		1.20826	1984
ENSMUSG00000054611	Kdm2a	4314419	4398285	40.63	protein_coding	lysine (K)-specific demethylase 2A	1498.65	0.272586	0.055398	4.92051	8.63204e-07	7.03588e-05		1.20797	83866
ENSMUSG00000026836	Acvr1	58388644	58567157	42.6	protein_coding	activin A receptor, type 1	310.243	0.272274	0.0853027	3.19185	0.00141364	0.019041		1.20771	178513
ENSMUSG00000032570	Atp2c1	105403539	105527319	41.01	protein_coding	ATPase, Ca++-sequestering	2893.71	0.272246	0.0614265	4.43206	9.33381e-06	0.000480256		1.20769	123780
ENSMUSG00000029125	Stx18	38038742	38137765	44.59	protein_coding	syntaxin 18	292.988	0.271931	0.0782318	3.47597	0.000509008	0.00942093		1.20742	99023
ENSMUSG00000052748	Swt1	151367699	151428455	38.49	protein_coding	SWT1 RNA endoribonuclease homolog (S. cerevisiae)	255.836	0.271832	0.102932	2.64088	0.00826906	0.0645305		1.20734	60756
ENSMUSG00000036934	4921524J17Rik	85408759	85432841	40.34	protein_coding	RIKEN cDNA 4921524J17 gene	167.121	0.271624	0.111889	2.42762	0.0151981	0.0957936		1.20717	24082
ENSMUSG00000028577	Plaa	94567514	94603244	38.84	protein_coding	phospholipase A2, activating protein	934.204	0.270944	0.0983734	2.75424	0.00588283	0.0513616		1.2066	35730
ENSMUSG00000020900	Myh10	68691559	68816632	45.72	protein_coding	myosin, heavy polypeptide 10, non-muscle	6392.08	0.270864	0.0911311	2.97225	0.00295627	0.0316018		1.20653	125073
ENSMUSG00000028165	Cisd2	135406412	135423925	42.49	protein_coding	CDGSH iron sulfur domain 2	413.909	0.270832	0.0905387	2.99134	0.0027776	0.0302953		1.2065	17513
ENSMUSG00000017667	Zfp334	165374264	165388259	49.45	protein_coding	zinc finger protein 334	603.945	0.270826	0.0628455	4.30939	1.63704e-05	0.000726458		1.2065	13995
ENSMUSG00000056919	Cep162	87189577	87255536	41.36	protein_coding	centrosomal protein 162	377.642	0.27075	0.0812802	3.33107	0.000865116	0.0135161		1.20644	65959
ENSMUSG00000031229	Atrx	105797615	105929397	38.38	protein_coding	alpha thalassemia/mental retardation syndrome X-linked homolog (human)	7412	0.270734	0.0973506	2.78102	0.00541883	0.0487158		1.20642	131782
ENSMUSG00000006740	Kif5b	6201002	6242174	38.71	protein_coding	kinesin family member 5B	5540.4	0.269642	0.096186	2.80334	0.00505767	0.04636		1.20551	41172
ENSMUSG00000052137	Rbm12b2	12089439	12096243	39.57	protein_coding	RNA binding motif protein 12 B2	172.309	0.269594	0.104254	2.58593	0.00971161	0.0718291		1.20547	6804
ENSMUSG00000027067	Ssrp1	85037234	85047109	48.87	protein_coding	structure specific recognition protein 1	1213.28	0.269559	0.110402	2.44161	0.014622	0.0934982		1.20544	9875
ENSMUSG00000031429	Psmd10	140948429	140956728	39.55	protein_coding	proteasome (prosome, macropain) 26S subunit, non-ATPase, 10	144.543	0.269418	0.111472	2.41692	0.0156523	0.0973808		1.20532	8299
ENSMUSG00000021638	Ocln	100496507	100552718	43.3	protein_coding	occludin	167.213	0.268914	0.111185	2.41862	0.0155794	0.0970635		1.2049	56211
ENSMUSG00000029227	Fip1l1	74535449	74598790	38.87	protein_coding	FIP1 like 1 (S. cerevisiae)	2011.74	0.268833	0.0781398	3.44041	0.000580838	0.0103922		1.20483	63341
ENSMUSG00000027274	Mkks	136873780	136891389	39.75	protein_coding	McKusick-Kaufman syndrome	317.752	0.268802	0.0852209	3.15418	0.00160949	0.0209478		1.20481	17609
ENSMUSG00000005225	Plekha8	54595111	54645839	42.8	protein_coding	pleckstrin homology domain containing, family A (phosphoinositide binding specific) member 8	317.452	0.268641	0.0801227	3.35287	0.000799792	0.0128163		1.20467	50728
ENSMUSG00000071074	Yipf3	46248080	46252537	55.25	protein_coding	Yip1 domain family, member 3	161.462	0.268611	0.0864128	3.10847	0.0018806	0.0234128		1.20465	4457
ENSMUSG00000037029	Zfp146	30161274	30169727	44.62	protein_coding	zinc finger protein 146	660.589	0.268562	0.0856401	3.13594	0.00171306	0.021926		1.20461	8453
ENSMUSG00000031555	Adam9	24949611	25016922	42.77	protein_coding	a disintegrin and metallopeptidase domain 9 (meltrin gamma)	900.844	0.268372	0.0826739	3.24614	0.00116979	0.0165205		1.20445	67311
ENSMUSG00000030020	Prickle2	92370892	92706145	42.95	protein_coding	prickle homolog 2 (Drosophila)	4250.63	0.268019	0.0734775	3.64763	0.000264667	0.0057779		1.20415	335253
ENSMUSG00000027534	Snx16	10417817	10440102	39.41	protein_coding	sorting nexin 16	464.002	0.267527	0.0738874	3.62074	0.000293757	0.00624578		1.20374	22285
ENSMUSG00000063646	Jakmip1	37028335	37148001	49.24	protein_coding	janus kinase and microtubule interacting protein 1	1583.3	0.26748	0.104758	2.5533	0.0106707	0.0762557		1.2037	119666
ENSMUSG00000074519	Etohi1	178023284	178034022	40.99	protein_coding	ethanol induced 1	261.769	0.267349	0.103718	2.57764	0.00994765	0.0727734		1.20359	10738
ENSMUSG00000029279	Brdt	107331159	107387058	41.93	protein_coding	bromodomain, testis-specific	176.033	0.267266	0.106921	2.49966	0.0124312	0.0842354		1.20353	55899
ENSMUSG00000037257	Aagab	63602655	63641889	46.53	protein_coding	alpha- and gamma-adaptin binding protein	525.347	0.266968	0.0623119	4.28438	1.83253e-05	0.00076451		1.20328	39234
ENSMUSG00000025427	Rnf165	77456110	77565147	48.81	protein_coding	ring finger protein 165	621.728	0.266892	0.107607	2.48024	0.0131294	0.087243		1.20321	109037
ENSMUSG00000026496	Parp1	180568924	180601254	49.59	protein_coding	poly (ADP-ribose) polymerase family, member 1	1087	0.266735	0.0789168	3.37995	0.000724981	0.0120331		1.20308	32330
ENSMUSG00000063808	Gpatch1	35276536	35318440	46.76	protein_coding	G patch domain containing 1	379.316	0.26654	0.0950028	2.80561	0.00502221	0.0461531		1.20292	41904
ENSMUSG00000020721	Helz	107547930	107693826	44.14	protein_coding	helicase with zinc finger domain	1510.31	0.266038	0.0761169	3.49513	0.00047384	0.00888723		1.2025	145896
ENSMUSG00000037876	Jmjd1c	67096125	67256326	40.41	protein_coding	jumonji domain containing 1C	2377.54	0.266026	0.0635772	4.18429	2.86057e-05	0.00108225		1.20249	160201
ENSMUSG00000027303	Ptpra	130450278	130554026	43.51	protein_coding	protein tyrosine phosphatase, receptor type, A	2418.18	0.266006	0.0726874	3.65959	0.000252617	0.00556882		1.20247	103748
ENSMUSG00000032042	Srpr	35200175	35247973	43.13	protein_coding	signal recognition particle receptor ('docking protein')	604.692	0.265959	0.0835323	3.18391	0.00145298	0.0194016		1.20244	47798
ENSMUSG00000022765	Snap29	17406003	17430826	43.56	protein_coding	synaptosomal-associated protein 29	488.885	0.265547	0.0965616	2.75002	0.00595911	0.051735		1.20209	24823
ENSMUSG00000058558	Rpl5	107900502	107909005	43.58	protein_coding	ribosomal protein L5	1557.8	0.264924	0.0953394	2.77875	0.00545685	0.0489152		1.20157	8503
ENSMUSG00000025025	Mxi1	53310506	53375810	46.73	protein_coding	Max interacting protein 1	1022.35	0.264834	0.106944	2.47638	0.0132723	0.0877602		1.2015	65304
ENSMUSG00000039763	Dnajc28	91614257	91619026	45.74	protein_coding	DnaJ (Hsp40) homolog, subfamily C, member 28	226.18	0.26479	0.0959615	2.75934	0.00579181	0.0510791		1.20146	4769
ENSMUSG00000063902	Gm7964	83755904	83757356	45.77	protein_coding	predicted gene 7964	307.296	0.264693	0.0926023	2.85838	0.00425809	0.0410542		1.20138	1452
ENSMUSG00000037526	Atg14	47540894	47568434	45.17	protein_coding	autophagy related 14	222.914	0.264481	0.0935827	2.82618	0.00471068	0.0440958		1.2012	27540
ENSMUSG00000021408	Ripk1	34002363	34035170	41.5	protein_coding	receptor (TNFRSF)-interacting serine-threonine kinase 1	99.7897	0.264402	0.106046	2.49329	0.0126567	0.0852768		1.20114	32807
ENSMUSG00000022437	Samm50	84192233	84214303	52.07	protein_coding	sorting and assembly machinery component 50 homolog (S. cerevisiae)	578.109	0.264136	0.107266	2.46244	0.0137995	0.090137		1.20092	22070
ENSMUSG00000026764	Kif5c	49619298	49774778	45.46	protein_coding	kinesin family member 5C	25157.3	0.263638	0.0776627	3.39465	0.00068716	0.0115293		1.2005	155480
ENSMUSG00000015605	Srf	46546839	46556162	55.36	protein_coding	serum response factor	680.348	0.263636	0.0879092	2.99895	0.00270909	0.0298696		1.2005	9323
ENSMUSG00000057101	Zfp180	24081924	24107698	45.59	protein_coding	zinc finger protein 180	776.099	0.263416	0.108266	2.43305	0.0149724	0.0946025		1.20032	25774
ENSMUSG00000040242	Fgfr1op2	146577203	146599198	40.08	protein_coding	FGFR1 oncogene partner 2	1282.29	0.263393	0.0713602	3.69104	0.00022334	0.00517639		1.2003	21995
ENSMUSG00000041870	Ankrd13a	114774677	114806200	50.69	protein_coding	ankyrin repeat domain 13a	390.006	0.263114	0.0953868	2.75839	0.00580869	0.0510791		1.20007	31523
ENSMUSG00000006998	Psmd2	20651652	20663414	45.42	protein_coding	proteasome (prosome, macropain) 26S subunit, non-ATPase, 2	2314.02	0.262758	0.0684817	3.83691	0.000124593	0.00340394		1.19977	11762
ENSMUSG00000019947	Arid5b	68095593	68278726	43.18	protein_coding	AT rich interactive domain 5B (MRF1-like)	606.237	0.26267	0.100158	2.62256	0.00872708	0.0671427		1.1997	183133
ENSMUSG00000087260	Lamtor5	107278858	107284079	42.95	protein_coding	late endosomal/lysosomal adaptor, MAPK and MTOR activator 5	234.765	0.262587	0.10195	2.57564	0.0100054	0.0731267		1.19963	5221
ENSMUSG00000049470	Aff4	53350833	53421830	39.7	protein_coding	AF4/FMR2 family, member 4	6053.88	0.262575	0.0503547	5.21451	1.84305e-07	1.97564e-05		1.19962	70997
ENSMUSG00000025417	Pip4k2c	127197067	127211622	49.67	protein_coding	phosphatidylinositol-5-phosphate 4-kinase, type II, gamma	1114.97	0.262276	0.0853021	3.07468	0.0021073	0.0251962		1.19937	14555
ENSMUSG00000054477	Kcnn2	45268860	45686024	39.39	protein_coding	potassium intermediate/small conductance calcium-activated channel, subfamily N, member 2	515.441	0.262276	0.0915263	2.86558	0.00416241	0.0404783		1.19937	417164
ENSMUSG00000028890	Mtf1	124802104	124849800	47.6	protein_coding	metal response element binding transcription factor 1	521.876	0.262273	0.0779654	3.36396	0.000768316	0.0125235		1.19937	47696
ENSMUSG00000052738	Suclg1	73248382	73276911	45.4	protein_coding	succinate-CoA ligase, GDP-forming, alpha subunit	633.169	0.262255	0.0886345	2.95883	0.00308808	0.0326267		1.19935	28529
ENSMUSG00000029203	Ube2k	65537233	65598988	39.86	protein_coding	ubiquitin-conjugating enzyme E2K	2019.81	0.262191	0.0675809	3.87967	0.000104599	0.0030032		1.1993	61755
[truncated: 1,489 more rows]

## Sheet: GFsi_high vs GFsi_low
Gene ID	baseMean	log2FoldChange	lfcSE	stat	pvalue	padj	Symbol	Description	Notes
[truncated: 4 more rows]

[truncated: 4 more sheets: exGF-exGFsi, CONsi-GFsi, CONsi-exGFsi, GFsi-exGFsi]
