# Supplementary material for: Social interaction-induced activation of RNA splicing in the amygdala of microbiome-deficient mice
Source: eLife. 2018 May 29;7:e33070. doi: 10.7554/eLife.33070 (PMC5995540; doi:10.7554/eLife.33070)
Supplement: Supplementary file 2. [file elife-33070-supp2.xlsx]

## Sheet: CON SI
Functional annotation and enrichment analysis using DAVID v6.7 (http://david.abcc.ncifcrf.gov/)
shown are only results with a false discovery rate (FDR) <25%; values with FDR<10% were considered significant; enriched terms with 10%>FDR<25% are shown in grey
FDR/100 is called p-adjusted (padj) in manuscript and figures
For the combined lists, only biological processes and pathways are reported
UP
Category	Term	Count	un-adjusted p-value	Genes	Fold Enrichment	FDR [%]	-log10 (FDR/100)
GOTERM_BP_5	GO:0006464~protein modification process	79	6.64627e-08	ENSMUSG00000033933, ENSMUSG00000020032, ENSMUSG00000053137, ENSMUSG00000018476, ENSMUSG00000021457, ENSMUSG00000015312, ENSMUSG00000037470, ENSMUSG00000024014, ENSMUSG00000031608, ENSMUSG00000020038, ENSMUSG00000030062, ENSMUSG00000027298, ENSMUSG00000038145, ENSMUSG00000032116, ENSMUSG00000049225, ENSMUSG00000060477, ENSMUSG00000034613, ENSMUSG00000027540, ENSMUSG00000056962, ENSMUSG00000024789,…	1.85406	0.000105444	5.97698
GOTERM_BP_5	GO:0044267~cellular protein metabolic process	113	1.2711e-07	ENSMUSG00000053137, ENSMUSG00000000740, ENSMUSG00000015656, ENSMUSG00000021457, ENSMUSG00000032905, ENSMUSG00000037470, ENSMUSG00000041264, ENSMUSG00000030062, ENSMUSG00000049225, ENSMUSG00000025290, ENSMUSG00000034613, ENSMUSG00000024789, ENSMUSG00000030849, ENSMUSG00000045948, ENSMUSG00000018648, ENSMUSG00000027646, ENSMUSG00000020601, ENSMUSG00000051590, ENSMUSG00000026740, ENSMUSG00000053716,…	1.60035	0.000201661	5.69538
GOTERM_BP_5	GO:0031326~regulation of cellular biosynthetic process	121	7.15493e-06	ENSMUSG00000055044, ENSMUSG00000071341, ENSMUSG00000050855, ENSMUSG00000038418, ENSMUSG00000025402, ENSMUSG00000021457, ENSMUSG00000028842, ENSMUSG00000028389, ENSMUSG00000037868, ENSMUSG00000025408, ENSMUSG00000059475, ENSMUSG00000027582, ENSMUSG00000025316, ENSMUSG00000024256, ENSMUSG00000024955, ENSMUSG00000020484, ENSMUSG00000013089, ENSMUSG00000043858, ENSMUSG00000037876, ENSMUSG00000024063,…	1.45039	0.0113507	3.94498
GOTERM_BP_5	GO:0010468~regulation of gene expression	118	1.57674e-05	ENSMUSG00000055044, ENSMUSG00000071341, ENSMUSG00000050855, ENSMUSG00000038418, ENSMUSG00000025402, ENSMUSG00000028842, ENSMUSG00000028389, ENSMUSG00000037868, ENSMUSG00000025408, ENSMUSG00000059475, ENSMUSG00000027582, ENSMUSG00000025316, ENSMUSG00000024955, ENSMUSG00000020484, ENSMUSG00000013089, ENSMUSG00000043858, ENSMUSG00000037876, ENSMUSG00000024063, ENSMUSG00000026313, ENSMUSG00000026740,…	1.43655	0.0250122	3.60185
GOTERM_BP_5	GO:0019219~regulation of nucleobase, nucleoside, nucleotide and nucleic acid metabolic process	115	1.6334e-05	ENSMUSG00000055044, ENSMUSG00000071341, ENSMUSG00000050855, ENSMUSG00000038418, ENSMUSG00000025402, ENSMUSG00000028389, ENSMUSG00000037868, ENSMUSG00000025408, ENSMUSG00000059475, ENSMUSG00000027582, ENSMUSG00000025316, ENSMUSG00000024256, ENSMUSG00000024955, ENSMUSG00000020484, ENSMUSG00000013089, ENSMUSG00000043858, ENSMUSG00000037876, ENSMUSG00000024063, ENSMUSG00000026313, ENSMUSG00000037279,…	1.44525	0.0259109	3.58652
GOTERM_BP_5	GO:0010556~regulation of macromolecule biosynthetic process	116	1.7021e-05	ENSMUSG00000055044, ENSMUSG00000071341, ENSMUSG00000050855, ENSMUSG00000038418, ENSMUSG00000025402, ENSMUSG00000021457, ENSMUSG00000028842, ENSMUSG00000028389, ENSMUSG00000037868, ENSMUSG00000025408, ENSMUSG00000059475, ENSMUSG00000027582, ENSMUSG00000025316, ENSMUSG00000024955, ENSMUSG00000020484, ENSMUSG00000013089, ENSMUSG00000043858, ENSMUSG00000037876, ENSMUSG00000024063, ENSMUSG00000026313,…	1.44067	0.0270005	3.56863
GOTERM_BP_5	GO:0045449~regulation of transcription	110	1.72994e-05	ENSMUSG00000055044, ENSMUSG00000071341, ENSMUSG00000050855, ENSMUSG00000038418, ENSMUSG00000025402, ENSMUSG00000028389, ENSMUSG00000037868, ENSMUSG00000025408, ENSMUSG00000059475, ENSMUSG00000027582, ENSMUSG00000025316, ENSMUSG00000024955, ENSMUSG00000020484, ENSMUSG00000013089, ENSMUSG00000043858, ENSMUSG00000037876, ENSMUSG00000024063, ENSMUSG00000026313, ENSMUSG00000037279, ENSMUSG00000028634,…	1.46063	0.0274422	3.56158
GOTERM_BP_5	GO:0007242~intracellular signaling cascade	54	6.99427e-05	ENSMUSG00000031442, ENSMUSG00000030357, ENSMUSG00000053137, ENSMUSG00000022951, ENSMUSG00000003037, ENSMUSG00000021457, ENSMUSG00000017144, ENSMUSG00000004451, ENSMUSG00000034936, ENSMUSG00000015312, ENSMUSG00000017418, ENSMUSG00000047904, ENSMUSG00000002307, ENSMUSG00000027581, ENSMUSG00000038611, ENSMUSG00000060477, ENSMUSG00000033863, ENSMUSG00000021062, ENSMUSG00000035711, ENSMUSG00000024789,…	1.74518	0.110907	2.95504
GOTERM_BP_5	GO:0006457~protein folding	15	9.53842e-05	ENSMUSG00000032171, ENSMUSG00000021037, ENSMUSG00000003226, ENSMUSG00000026740, ENSMUSG00000028035, ENSMUSG00000030357, ENSMUSG00000057069, ENSMUSG00000036052, ENSMUSG00000007944, ENSMUSG00000015656, ENSMUSG00000003814, ENSMUSG00000024222, ENSMUSG00000029657, ENSMUSG00000004460, ENSMUSG00000005483	3.49265	0.151221	2.82039
GOTERM_BP_5	GO:0007167~enzyme linked receptor protein signaling pathway	23	0.000143762	ENSMUSG00000037112, ENSMUSG00000017376, ENSMUSG00000027540, ENSMUSG00000024789, ENSMUSG00000027560, ENSMUSG00000028876, ENSMUSG00000020053, ENSMUSG00000027660, ENSMUSG00000032220, ENSMUSG00000030849, ENSMUSG00000038485, ENSMUSG00000032515, ENSMUSG00000021457, ENSMUSG00000028907, ENSMUSG00000027646, ENSMUSG00000000489, ENSMUSG00000021253, ENSMUSG00000032402, ENSMUSG00000024486, ENSMUSG00000038894,…	2.49134	0.227835	2.64238
GOTERM_BP_5	GO:0016311~dephosphorylation	14	0.000957802	ENSMUSG00000034613, ENSMUSG00000037926, ENSMUSG00000027540, ENSMUSG00000015214, ENSMUSG00000018648, ENSMUSG00000039661, ENSMUSG00000031530, ENSMUSG00000053716, ENSMUSG00000024539, ENSMUSG00000018401, ENSMUSG00000019907, ENSMUSG00000019960, ENSMUSG00000049225, ENSMUSG00000023805	2.93614	1.50879	1.82137
GOTERM_BP_5	GO:0007243~protein kinase cascade	19	0.00107769	ENSMUSG00000039285, ENSMUSG00000037112, ENSMUSG00000024242, ENSMUSG00000017376, ENSMUSG00000024789, ENSMUSG00000027560, ENSMUSG00000029458, ENSMUSG00000053137, ENSMUSG00000033629, ENSMUSG00000021457, ENSMUSG00000027351, ENSMUSG00000032380, ENSMUSG00000041241, ENSMUSG00000021253, ENSMUSG00000042429, ENSMUSG00000015312, ENSMUSG00000024042, ENSMUSG00000060477, ENSMUSG00000049556	2.38072	1.69614	1.77054
GOTERM_BP_5	GO:0016310~phosphorylation	41	0.00119176	ENSMUSG00000016179, ENSMUSG00000024242, ENSMUSG00000037112, ENSMUSG00000020032, ENSMUSG00000050271, ENSMUSG00000029635, ENSMUSG00000053137, ENSMUSG00000028862, ENSMUSG00000021701, ENSMUSG00000021457, ENSMUSG00000041241, ENSMUSG00000042429, ENSMUSG00000015312, ENSMUSG00000024014, ENSMUSG00000027298, ENSMUSG00000038145, ENSMUSG00000004056, ENSMUSG00000042608, ENSMUSG00000060477, ENSMUSG00000024576,…	1.6886	1.87409	1.72721
GOTERM_BP_5	GO:0007264~small GTPase mediated signal transduction	20	0.00119661	ENSMUSG00000031442, ENSMUSG00000021062, ENSMUSG00000035711, ENSMUSG00000029458, ENSMUSG00000033629, ENSMUSG00000054855, ENSMUSG00000003037, ENSMUSG00000017144, ENSMUSG00000024096, ENSMUSG00000020440, ENSMUSG00000030704, ENSMUSG00000028214, ENSMUSG00000004451, ENSMUSG00000034936, ENSMUSG00000017418, ENSMUSG00000022075, ENSMUSG00000062421, ENSMUSG00000031880, ENSMUSG00000032470, ENSMUSG00000025372	2.29233	1.88165	1.72546
GOTERM_BP_5	GO:0010558~negative regulation of macromolecule biosynthetic process	27	0.00201304	ENSMUSG00000040363, ENSMUSG00000018476, ENSMUSG00000036052, ENSMUSG00000035877, ENSMUSG00000037235, ENSMUSG00000028842, ENSMUSG00000025402, ENSMUSG00000038418, ENSMUSG00000003382, ENSMUSG00000032402, ENSMUSG00000031609, ENSMUSG00000002307, ENSMUSG00000027582, ENSMUSG00000042500, ENSMUSG00000027660, ENSMUSG00000027680, ENSMUSG00000030103, ENSMUSG00000034271, ENSMUSG00000066900, ENSMUSG00000020893,…	1.91009	3.14637	1.50219
GOTERM_BP_5	GO:0031327~negative regulation of cellular biosynthetic process	27	0.00296404	ENSMUSG00000040363, ENSMUSG00000018476, ENSMUSG00000036052, ENSMUSG00000035877, ENSMUSG00000037235, ENSMUSG00000028842, ENSMUSG00000025402, ENSMUSG00000038418, ENSMUSG00000003382, ENSMUSG00000032402, ENSMUSG00000031609, ENSMUSG00000002307, ENSMUSG00000027582, ENSMUSG00000042500, ENSMUSG00000027660, ENSMUSG00000027680, ENSMUSG00000030103, ENSMUSG00000034271, ENSMUSG00000066900, ENSMUSG00000020893,…	1.85679	4.60029	1.33722
GOTERM_BP_5	GO:0010629~negative regulation of gene expression	26	0.00315321	ENSMUSG00000040363, ENSMUSG00000018476, ENSMUSG00000036052, ENSMUSG00000035877, ENSMUSG00000037235, ENSMUSG00000028842, ENSMUSG00000025402, ENSMUSG00000038418, ENSMUSG00000003382, ENSMUSG00000032402, ENSMUSG00000031609, ENSMUSG00000002307, ENSMUSG00000027582, ENSMUSG00000042500, ENSMUSG00000027660, ENSMUSG00000030103, ENSMUSG00000034271, ENSMUSG00000066900, ENSMUSG00000020893, ENSMUSG00000066687,…	1.87524	4.88704	1.31095
GOTERM_BP_5	GO:0009890~negative regulation of biosynthetic process	27	0.00327447	ENSMUSG00000040363, ENSMUSG00000018476, ENSMUSG00000036052, ENSMUSG00000035877, ENSMUSG00000037235, ENSMUSG00000028842, ENSMUSG00000025402, ENSMUSG00000038418, ENSMUSG00000003382, ENSMUSG00000032402, ENSMUSG00000031609, ENSMUSG00000002307, ENSMUSG00000027582, ENSMUSG00000042500, ENSMUSG00000027660, ENSMUSG00000027680, ENSMUSG00000030103, ENSMUSG00000034271, ENSMUSG00000066900, ENSMUSG00000020893,…	1.83968	5.07044	1.29495
GOTERM_BP_5	GO:0016481~negative regulation of transcription	24	0.00392178	ENSMUSG00000040363, ENSMUSG00000018476, ENSMUSG00000027660, ENSMUSG00000036052, ENSMUSG00000035877, ENSMUSG00000037235, ENSMUSG00000030103, ENSMUSG00000038418, ENSMUSG00000025402, ENSMUSG00000034271, ENSMUSG00000066900, ENSMUSG00000003382, ENSMUSG00000066687, ENSMUSG00000020893, ENSMUSG00000055866, ENSMUSG00000026313, ENSMUSG00000032402, ENSMUSG00000051495, ENSMUSG00000037279, ENSMUSG00000031609,…	1.90781	6.04382	1.21869
GOTERM_BP_5	GO:0016477~cell migration	17	0.00743154	ENSMUSG00000033933, ENSMUSG00000066877, ENSMUSG00000031217, ENSMUSG00000032532, ENSMUSG00000015605, ENSMUSG00000030707, ENSMUSG00000027646, ENSMUSG00000000489, ENSMUSG00000043858, ENSMUSG00000027797, ENSMUSG00000048163, ENSMUSG00000023905, ENSMUSG00000024486, ENSMUSG00000037279, ENSMUSG00000055805, ENSMUSG00000005069, ENSMUSG00000018736	2.09462	11.1608
GOTERM_BP_5	GO:0045934~negative regulation of nucleobase, nucleoside, nucleotide and nucleic acid metabolic process	24	0.00828969	ENSMUSG00000040363, ENSMUSG00000018476, ENSMUSG00000027660, ENSMUSG00000036052, ENSMUSG00000035877, ENSMUSG00000037235, ENSMUSG00000030103, ENSMUSG00000038418, ENSMUSG00000025402, ENSMUSG00000034271, ENSMUSG00000066900, ENSMUSG00000003382, ENSMUSG00000066687, ENSMUSG00000020893, ENSMUSG00000055866, ENSMUSG00000026313, ENSMUSG00000032402, ENSMUSG00000051495, ENSMUSG00000037279, ENSMUSG00000031609,…	1.78767	12.3716
GOTERM_BP_5	GO:0045892~negative regulation of transcription, DNA-dependent	20	0.00839352	ENSMUSG00000040363, ENSMUSG00000018476, ENSMUSG00000027660, ENSMUSG00000036052, ENSMUSG00000035877, ENSMUSG00000030103, ENSMUSG00000038418, ENSMUSG00000034271, ENSMUSG00000003382, ENSMUSG00000066687, ENSMUSG00000020893, ENSMUSG00000055866, ENSMUSG00000026313, ENSMUSG00000032402, ENSMUSG00000051495, ENSMUSG00000037279, ENSMUSG00000031609, ENSMUSG00000002307, ENSMUSG00000034738, ENSMUSG00000027582	1.9202	12.517
GOTERM_BP_5	GO:0051253~negative regulation of RNA metabolic process	20	0.00896792	ENSMUSG00000040363, ENSMUSG00000018476, ENSMUSG00000027660, ENSMUSG00000036052, ENSMUSG00000035877, ENSMUSG00000030103, ENSMUSG00000038418, ENSMUSG00000034271, ENSMUSG00000003382, ENSMUSG00000066687, ENSMUSG00000020893, ENSMUSG00000055866, ENSMUSG00000026313, ENSMUSG00000032402, ENSMUSG00000051495, ENSMUSG00000037279, ENSMUSG00000031609, ENSMUSG00000002307, ENSMUSG00000034738, ENSMUSG00000027582	1.90781	13.3175
GOTERM_BP_5	GO:0051172~negative regulation of nitrogen compound metabolic process	24	0.0092398	ENSMUSG00000040363, ENSMUSG00000018476, ENSMUSG00000027660, ENSMUSG00000036052, ENSMUSG00000035877, ENSMUSG00000037235, ENSMUSG00000030103, ENSMUSG00000038418, ENSMUSG00000025402, ENSMUSG00000034271, ENSMUSG00000066900, ENSMUSG00000003382, ENSMUSG00000066687, ENSMUSG00000020893, ENSMUSG00000055866, ENSMUSG00000026313, ENSMUSG00000032402, ENSMUSG00000051495, ENSMUSG00000037279, ENSMUSG00000031609,…	1.76984	13.6941
GOTERM_BP_5	GO:0010648~negative regulation of cell communication	14	0.010402	ENSMUSG00000017376, ENSMUSG00000021025, ENSMUSG00000034997, ENSMUSG00000020053, ENSMUSG00000027660, ENSMUSG00000038485, ENSMUSG00000043858, ENSMUSG00000026864, ENSMUSG00000021253, ENSMUSG00000042429, ENSMUSG00000026360, ENSMUSG00000035873, ENSMUSG00000027581, ENSMUSG00000027582	2.22578	15.2863
GOTERM_BP_5	GO:0045941~positive regulation of transcription	27	0.0104718	ENSMUSG00000002028, ENSMUSG00000006215, ENSMUSG00000020053, ENSMUSG00000028341, ENSMUSG00000038418, ENSMUSG00000008384, ENSMUSG00000037868, ENSMUSG00000025408, ENSMUSG00000032402, ENSMUSG00000022389, ENSMUSG00000056501, ENSMUSG00000041324, ENSMUSG00000042406, ENSMUSG00000024955, ENSMUSG00000013089, ENSMUSG00000028890, ENSMUSG00000068744, ENSMUSG00000032515, ENSMUSG00000015605, ENSMUSG00000006705,…	1.68088	15.381
GOTERM_BP_5	GO:0051252~regulation of RNA metabolic process	67	0.01174	ENSMUSG00000006215, ENSMUSG00000018476, ENSMUSG00000050855, ENSMUSG00000028341, ENSMUSG00000029135, ENSMUSG00000038418, ENSMUSG00000028389, ENSMUSG00000037868, ENSMUSG00000025408, ENSMUSG00000032402, ENSMUSG00000031609, ENSMUSG00000002307, ENSMUSG00000059475, ENSMUSG00000041324, ENSMUSG00000042406, ENSMUSG00000027582, ENSMUSG00000024955, ENSMUSG00000020484, ENSMUSG00000013089, ENSMUSG00000068744,…	1.33149	17.0853
GOTERM_BP_5	GO:0031328~positive regulation of cellular biosynthetic process	30	0.0118178	ENSMUSG00000002028, ENSMUSG00000006215, ENSMUSG00000020053, ENSMUSG00000028341, ENSMUSG00000021457, ENSMUSG00000038418, ENSMUSG00000008384, ENSMUSG00000037868, ENSMUSG00000025408, ENSMUSG00000032402, ENSMUSG00000022389, ENSMUSG00000035873, ENSMUSG00000056501, ENSMUSG00000041324, ENSMUSG00000042406, ENSMUSG00000024955, ENSMUSG00000013089, ENSMUSG00000028890, ENSMUSG00000053004, ENSMUSG00000068744,…	1.60712	17.1888
GOTERM_BP_5	GO:0010557~positive regulation of macromolecule biosynthetic process	29	0.012555	ENSMUSG00000002028, ENSMUSG00000006215, ENSMUSG00000020053, ENSMUSG00000028341, ENSMUSG00000021457, ENSMUSG00000038418, ENSMUSG00000008384, ENSMUSG00000037868, ENSMUSG00000025408, ENSMUSG00000032402, ENSMUSG00000022389, ENSMUSG00000035873, ENSMUSG00000056501, ENSMUSG00000041324, ENSMUSG00000042406, ENSMUSG00000024955, ENSMUSG00000013089, ENSMUSG00000028890, ENSMUSG00000068744, ENSMUSG00000032515,…	1.61804	18.1635
GOTERM_BP_5	GO:0043549~regulation of kinase activity	14	0.013312	ENSMUSG00000034997, ENSMUSG00000022136, ENSMUSG00000021457, ENSMUSG00000027351, ENSMUSG00000043858, ENSMUSG00000041241, ENSMUSG00000021253, ENSMUSG00000042429, ENSMUSG00000020601, ENSMUSG00000015312, ENSMUSG00000033055, ENSMUSG00000023067, ENSMUSG00000027582, ENSMUSG00000060477	2.15622	19.1532
GOTERM_BP_5	GO:0009891~positive regulation of biosynthetic process	30	0.0135602	ENSMUSG00000002028, ENSMUSG00000006215, ENSMUSG00000020053, ENSMUSG00000028341, ENSMUSG00000021457, ENSMUSG00000038418, ENSMUSG00000008384, ENSMUSG00000037868, ENSMUSG00000025408, ENSMUSG00000032402, ENSMUSG00000022389, ENSMUSG00000035873, ENSMUSG00000056501, ENSMUSG00000041324, ENSMUSG00000042406, ENSMUSG00000024955, ENSMUSG00000013089, ENSMUSG00000028890, ENSMUSG00000053004, ENSMUSG00000068744,…	1.5927	19.4753
GOTERM_BP_5	GO:0051174~regulation of phosphorus metabolic process	19	0.0136389	ENSMUSG00000034997, ENSMUSG00000024789, ENSMUSG00000022136, ENSMUSG00000052305, ENSMUSG00000022951, ENSMUSG00000021457, ENSMUSG00000027351, ENSMUSG00000000489, ENSMUSG00000043858, ENSMUSG00000041241, ENSMUSG00000021253, ENSMUSG00000042429, ENSMUSG00000015312, ENSMUSG00000020601, ENSMUSG00000033055, ENSMUSG00000025856, ENSMUSG00000023067, ENSMUSG00000027582, ENSMUSG00000060477	1.86661	19.5772
GOTERM_BP_5	GO:0019220~regulation of phosphate metabolic process	19	0.0136389	ENSMUSG00000034997, ENSMUSG00000024789, ENSMUSG00000022136, ENSMUSG00000052305, ENSMUSG00000022951, ENSMUSG00000021457, ENSMUSG00000027351, ENSMUSG00000000489, ENSMUSG00000043858, ENSMUSG00000041241, ENSMUSG00000021253, ENSMUSG00000042429, ENSMUSG00000015312, ENSMUSG00000020601, ENSMUSG00000033055, ENSMUSG00000025856, ENSMUSG00000023067, ENSMUSG00000027582, ENSMUSG00000060477	1.86661	19.5772
GOTERM_BP_5	GO:0008286~insulin receptor signaling pathway	5	0.0137631	ENSMUSG00000037112, ENSMUSG00000027540, ENSMUSG00000038894, ENSMUSG00000024539, ENSMUSG00000038485	5.28055	19.7377
GOTERM_BP_5	GO:0032868~response to insulin stimulus	7	0.014185	ENSMUSG00000037868, ENSMUSG00000037112, ENSMUSG00000027540, ENSMUSG00000038894, ENSMUSG00000024539, ENSMUSG00000004056, ENSMUSG00000038485	3.50843	20.2806
GOTERM_BP_5	GO:0032869~cellular response to insulin stimulus	6	0.0143128	ENSMUSG00000037112, ENSMUSG00000027540, ENSMUSG00000038894, ENSMUSG00000024539, ENSMUSG00000004056, ENSMUSG00000038485	4.1262	20.4444
GOTERM_BP_5	GO:0010628~positive regulation of gene expression	27	0.0144569	ENSMUSG00000002028, ENSMUSG00000006215, ENSMUSG00000020053, ENSMUSG00000028341, ENSMUSG00000038418, ENSMUSG00000008384, ENSMUSG00000037868, ENSMUSG00000025408, ENSMUSG00000032402, ENSMUSG00000022389, ENSMUSG00000056501, ENSMUSG00000041324, ENSMUSG00000042406, ENSMUSG00000024955, ENSMUSG00000013089, ENSMUSG00000028890, ENSMUSG00000068744, ENSMUSG00000032515, ENSMUSG00000015605, ENSMUSG00000006705,…	1.63611	20.6288
GOTERM_BP_5	GO:0031324~negative regulation of cellular metabolic process	27	0.0146978	ENSMUSG00000040363, ENSMUSG00000018476, ENSMUSG00000036052, ENSMUSG00000035877, ENSMUSG00000037235, ENSMUSG00000028842, ENSMUSG00000025402, ENSMUSG00000038418, ENSMUSG00000003382, ENSMUSG00000032402, ENSMUSG00000031609, ENSMUSG00000002307, ENSMUSG00000027582, ENSMUSG00000042500, ENSMUSG00000027660, ENSMUSG00000027680, ENSMUSG00000030103, ENSMUSG00000034271, ENSMUSG00000066900, ENSMUSG00000020893,…	1.63276	20.936
GOTERM_BP_5	GO:0006595~polyamine metabolic process	4	0.0153891	ENSMUSG00000035242, ENSMUSG00000040652, ENSMUSG00000027333, ENSMUSG00000075232	7.39277	21.8114
GOTERM_BP_5	GO:0006929~substrate-bound cell migration	3	0.0155627	ENSMUSG00000023905, ENSMUSG00000055805, ENSMUSG00000000489	14.7855	22.0299
GOTERM_BP_5	GO:0006355~regulation of transcription, DNA-dependent	65	0.0169628	ENSMUSG00000006215, ENSMUSG00000018476, ENSMUSG00000050855, ENSMUSG00000028341, ENSMUSG00000029135, ENSMUSG00000038418, ENSMUSG00000028389, ENSMUSG00000037868, ENSMUSG00000025408, ENSMUSG00000032402, ENSMUSG00000031609, ENSMUSG00000002307, ENSMUSG00000059475, ENSMUSG00000041324, ENSMUSG00000042406, ENSMUSG00000027582, ENSMUSG00000024955, ENSMUSG00000020484, ENSMUSG00000013089, ENSMUSG00000068744,…	1.31203	23.7708
GOTERM_CC_5	GO:0005634~nucleus	204	5.3391e-09	ENSMUSG00000029177, ENSMUSG00000050855, ENSMUSG00000022951, ENSMUSG00000038418, ENSMUSG00000028907, ENSMUSG00000059475, ENSMUSG00000031791, ENSMUSG00000029169, ENSMUSG00000013089, ENSMUSG00000043858, ENSMUSG00000048039, ENSMUSG00000021276, ENSMUSG00000026740, ENSMUSG00000037279, ENSMUSG00000051451, ENSMUSG00000021111, ENSMUSG00000051469, ENSMUSG00000022526, ENSMUSG00000039485, ENSMUSG00000047824,…	1.40931	6.97037e-06	7.15674
GOTERM_CC_5	GO:0043231~intracellular membrane-bounded organelle	300	9.33443e-08	ENSMUSG00000029177, ENSMUSG00000022951, ENSMUSG00000050855, ENSMUSG00000038418, ENSMUSG00000028907, ENSMUSG00000027864, ENSMUSG00000020261, ENSMUSG00000059475, ENSMUSG00000031788, ENSMUSG00000049225, ENSMUSG00000031791, ENSMUSG00000029169, ENSMUSG00000000001, ENSMUSG00000013089, ENSMUSG00000048578, ENSMUSG00000045948, ENSMUSG00000043858, ENSMUSG00000048039, ENSMUSG00000026740, ENSMUSG00000021276,…	1.23265	0.000121864	5.91412
GOTERM_CC_5	GO:0043229~intracellular organelle	328	2.64523e-07	ENSMUSG00000058070, ENSMUSG00000029177, ENSMUSG00000022951, ENSMUSG00000050855, ENSMUSG00000038418, ENSMUSG00000019370, ENSMUSG00000028907, ENSMUSG00000027864, ENSMUSG00000020261, ENSMUSG00000059475, ENSMUSG00000031788, ENSMUSG00000049225, ENSMUSG00000031791, ENSMUSG00000001525, ENSMUSG00000029169, ENSMUSG00000024789, ENSMUSG00000000001, ENSMUSG00000054855, ENSMUSG00000013089, ENSMUSG00000048578,…	1.19442	0.000345343	5.46175
GOTERM_CC_5	GO:0005737~cytoplasm	268	1.55758e-06	ENSMUSG00000058070, ENSMUSG00000031781, ENSMUSG00000022951, ENSMUSG00000028907, ENSMUSG00000019370, ENSMUSG00000032503, ENSMUSG00000027864, ENSMUSG00000032905, ENSMUSG00000020261, ENSMUSG00000031788, ENSMUSG00000049225, ENSMUSG00000031791, ENSMUSG00000001525, ENSMUSG00000024789, ENSMUSG00000042719, ENSMUSG00000000001, ENSMUSG00000054855, ENSMUSG00000048578, ENSMUSG00000045948, ENSMUSG00000043858,…	1.23515	0.00203345	4.69177
GOTERM_CC_5	GO:0005788~endoplasmic reticulum lumen	12	2.51698e-05	ENSMUSG00000018906, ENSMUSG00000037470, ENSMUSG00000026740, ENSMUSG00000048482, ENSMUSG00000020571, ENSMUSG00000019916, ENSMUSG00000003814, ENSMUSG00000025823, ENSMUSG00000022769, ENSMUSG00000032115, ENSMUSG00000004460, ENSMUSG00000026864	4.96827	0.032855	3.4834
GOTERM_CC_5	GO:0044432~endoplasmic reticulum part	22	3.3316e-05	ENSMUSG00000018906, ENSMUSG00000036078, ENSMUSG00000031770, ENSMUSG00000048482, ENSMUSG00000022136, ENSMUSG00000003814, ENSMUSG00000025823, ENSMUSG00000041220, ENSMUSG00000004460, ENSMUSG00000026864, ENSMUSG00000037470, ENSMUSG00000026740, ENSMUSG00000057069, ENSMUSG00000020571, ENSMUSG00000019916, ENSMUSG00000030062, ENSMUSG00000022561, ENSMUSG00000032116, ENSMUSG00000022769, ENSMUSG00000038007,…	2.83901	0.0434864	3.36165
GOTERM_CC_5	GO:0070013~intracellular organelle lumen	58	0.0012401	ENSMUSG00000055044, ENSMUSG00000048482, ENSMUSG00000022160, ENSMUSG00000020076, ENSMUSG00000025823, ENSMUSG00000028907, ENSMUSG00000026127, ENSMUSG00000026439, ENSMUSG00000034936, ENSMUSG00000037470, ENSMUSG00000032402, ENSMUSG00000027613, ENSMUSG00000031609, ENSMUSG00000020571, ENSMUSG00000002307, ENSMUSG00000030888, ENSMUSG00000049225, ENSMUSG00000042406, ENSMUSG00000032115, ENSMUSG00000022538,…	1.526	1.60694	1.794
GOTERM_CC_5	GO:0031965~nuclear membrane	7	0.00151432	ENSMUSG00000031791, ENSMUSG00000036078, ENSMUSG00000062075, ENSMUSG00000027613, ENSMUSG00000026021, ENSMUSG00000028063, ENSMUSG00000027944	5.49125	1.95905	1.70795
GOTERM_CC_5	GO:0005635~nuclear envelope	14	0.00190419	ENSMUSG00000031791, ENSMUSG00000036078, ENSMUSG00000003226, ENSMUSG00000062075, ENSMUSG00000027613, ENSMUSG00000026021, ENSMUSG00000028063, ENSMUSG00000027944, ENSMUSG00000026353, ENSMUSG00000063895, ENSMUSG00000018736, ENSMUSG00000043858, ENSMUSG00000026491, ENSMUSG00000000531	2.72768	2.45764	1.60948
GOTERM_CC_5	GO:0005783~endoplasmic reticulum	45	0.00203246	ENSMUSG00000036078, ENSMUSG00000021037, ENSMUSG00000020869, ENSMUSG00000048482, ENSMUSG00000048486, ENSMUSG00000003814, ENSMUSG00000025823, ENSMUSG00000041220, ENSMUSG00000026864, ENSMUSG00000027864, ENSMUSG00000042429, ENSMUSG00000037470, ENSMUSG00000030082, ENSMUSG00000057069, ENSMUSG00000027944, ENSMUSG00000020571, ENSMUSG00000030062, ENSMUSG00000022561, ENSMUSG00000032116, ENSMUSG00000032115,…	1.60076	2.62118	1.5815
GOTERM_CC_5	GO:0005638~lamin filament	3	0.00641567	ENSMUSG00000062075, ENSMUSG00000027613, ENSMUSG00000028063	22.3572	8.05949	1.09369
GOTERM_CC_5	GO:0031981~nuclear lumen	44	0.00862553	ENSMUSG00000002028, ENSMUSG00000062075, ENSMUSG00000055044, ENSMUSG00000043866, ENSMUSG00000035621, ENSMUSG00000029635, ENSMUSG00000022160, ENSMUSG00000020076, ENSMUSG00000028907, ENSMUSG00000039449, ENSMUSG00000026127, ENSMUSG00000003382, ENSMUSG00000026439, ENSMUSG00000025049, ENSMUSG00000034936, ENSMUSG00000003868, ENSMUSG00000032402, ENSMUSG00000027613, ENSMUSG00000031609, ENSMUSG00000002307,…	1.48542	10.6936
GOTERM_CC_5	GO:0044428~nuclear part	58	0.00872433	ENSMUSG00000036078, ENSMUSG00000003226, ENSMUSG00000055044, ENSMUSG00000022160, ENSMUSG00000027193, ENSMUSG00000020076, ENSMUSG00000028907, ENSMUSG00000026127, ENSMUSG00000026439, ENSMUSG00000034936, ENSMUSG00000031060, ENSMUSG00000032402, ENSMUSG00000027613, ENSMUSG00000031609, ENSMUSG00000002307, ENSMUSG00000030888, ENSMUSG00000042406, ENSMUSG00000031791, ENSMUSG00000022538, ENSMUSG00000003923,…	1.3932	10.8098
GOTERM_CC_5	GO:0005637~nuclear inner membrane	4	0.0125633	ENSMUSG00000036078, ENSMUSG00000062075, ENSMUSG00000027613, ENSMUSG00000028063	7.94923	15.2154
GOTERM_CC_5	GO:0044451~nucleoplasm part	28	0.0137726	ENSMUSG00000002028, ENSMUSG00000055044, ENSMUSG00000043866, ENSMUSG00000029635, ENSMUSG00000022160, ENSMUSG00000039449, ENSMUSG00000026439, ENSMUSG00000003382, ENSMUSG00000025049, ENSMUSG00000003868, ENSMUSG00000032402, ENSMUSG00000031609, ENSMUSG00000002307, ENSMUSG00000063889, ENSMUSG00000042406, ENSMUSG00000040782, ENSMUSG00000003923, ENSMUSG00000022538, ENSMUSG00000066042, ENSMUSG00000066900,…	1.62704	16.5611
Category	Term	Count	PValue	Genes	Fold Enrichment	FDR
GOTERM_MF_5	GO:0004672~protein kinase activity	37	3.28513e-05	ENSMUSG00000016179, ENSMUSG00000024242, ENSMUSG00000037112, ENSMUSG00000020032, ENSMUSG00000050271, ENSMUSG00000029635, ENSMUSG00000053137, ENSMUSG00000028862, ENSMUSG00000021701, ENSMUSG00000021457, ENSMUSG00000024014, ENSMUSG00000027298, ENSMUSG00000038145, ENSMUSG00000004056, ENSMUSG00000042608, ENSMUSG00000060477, ENSMUSG00000024576, ENSMUSG00000042978, ENSMUSG00000017376, ENSMUSG00000024789,…	2.0927	0.0383542	3.41619
GOTERM_MF_5	GO:0032559~adenyl ribonucleotide binding	67	0.000398131	ENSMUSG00000027722, ENSMUSG00000032294, ENSMUSG00000020032, ENSMUSG00000060671, ENSMUSG00000030357, ENSMUSG00000053137, ENSMUSG00000015656, ENSMUSG00000053907, ENSMUSG00000020076, ENSMUSG00000042751, ENSMUSG00000021457, ENSMUSG00000026473, ENSMUSG00000039804, ENSMUSG00000068739, ENSMUSG00000024014, ENSMUSG00000027298, ENSMUSG00000038145, ENSMUSG00000031788, ENSMUSG00000032115, ENSMUSG00000060477,…	1.5132	0.463917	2.33356
GOTERM_MF_5	GO:0032561~guanyl ribonucleotide binding	24	0.000645407	ENSMUSG00000001525, ENSMUSG00000022538, ENSMUSG00000021062, ENSMUSG00000030357, ENSMUSG00000000001, ENSMUSG00000028527, ENSMUSG00000054855, ENSMUSG00000003037, ENSMUSG00000017144, ENSMUSG00000020440, ENSMUSG00000004451, ENSMUSG00000028214, ENSMUSG00000020088, ENSMUSG00000030704, ENSMUSG00000034936, ENSMUSG00000049680, ENSMUSG00000040009, ENSMUSG00000017418, ENSMUSG00000022075, ENSMUSG00000026202,…	2.18011	0.751059	2.12433
GOTERM_MF_5	GO:0016791~phosphatase activity	18	0.000892562	ENSMUSG00000034613, ENSMUSG00000037926, ENSMUSG00000026617, ENSMUSG00000027540, ENSMUSG00000015214, ENSMUSG00000046062, ENSMUSG00000018648, ENSMUSG00000039661, ENSMUSG00000026102, ENSMUSG00000027088, ENSMUSG00000031530, ENSMUSG00000053716, ENSMUSG00000024539, ENSMUSG00000019907, ENSMUSG00000018401, ENSMUSG00000019960, ENSMUSG00000049225, ENSMUSG00000023805	2.49385	1.0373	1.98409
PANTHER_BP_ALL	BP00062:Protein folding	23	1.42207e-09	ENSMUSG00000021037, ENSMUSG00000028035, ENSMUSG00000030357, ENSMUSG00000005936, ENSMUSG00000036052, ENSMUSG00000015656, ENSMUSG00000007944, ENSMUSG00000063802, ENSMUSG00000003814, ENSMUSG00000005483, ENSMUSG00000004460, ENSMUSG00000026864, ENSMUSG00000032171, ENSMUSG00000038187, ENSMUSG00000022403, ENSMUSG00000026740, ENSMUSG00000024780, ENSMUSG00000057069, ENSMUSG00000026203, ENSMUSG00000027305,…	4.90965	1.74002e-06	7.75945
PANTHER_BP_ALL	BP00063:Protein modification	72	1.84248e-08	ENSMUSG00000020032, ENSMUSG00000053137, ENSMUSG00000021360, ENSMUSG00000025823, ENSMUSG00000021457, ENSMUSG00000037470, ENSMUSG00000030584, ENSMUSG00000020571, ENSMUSG00000031608, ENSMUSG00000030062, ENSMUSG00000027298, ENSMUSG00000038145, ENSMUSG00000060477, ENSMUSG00000034613, ENSMUSG00000027540, ENSMUSG00000028541, ENSMUSG00000024789, ENSMUSG00000028876, ENSMUSG00000042719, ENSMUSG00000026110,…	2.00058	2.25443e-05	6.64696
PANTHER_BP_ALL	BP00064:Protein phosphorylation	45	2.03092e-06	ENSMUSG00000016179, ENSMUSG00000024242, ENSMUSG00000037112, ENSMUSG00000020032, ENSMUSG00000029635, ENSMUSG00000053137, ENSMUSG00000028862, ENSMUSG00000021701, ENSMUSG00000021457, ENSMUSG00000019907, ENSMUSG00000027298, ENSMUSG00000038145, ENSMUSG00000004056, ENSMUSG00000042608, ENSMUSG00000060477, ENSMUSG00000037926, ENSMUSG00000034613, ENSMUSG00000024576, ENSMUSG00000042978, ENSMUSG00000017376,…	2.16387	0.00248498	4.60468
PANTHER_BP_ALL	BP00060:Protein metabolism and modification	125	0.000181884	ENSMUSG00000053137, ENSMUSG00000000740, ENSMUSG00000015656, ENSMUSG00000025823, ENSMUSG00000021457, ENSMUSG00000028842, ENSMUSG00000042599, ENSMUSG00000038187, ENSMUSG00000037470, ENSMUSG00000020571, ENSMUSG00000030062, ENSMUSG00000025290, ENSMUSG00000034613, ENSMUSG00000063317, ENSMUSG00000024789, ENSMUSG00000026110, ENSMUSG00000042719, ENSMUSG00000033316, ENSMUSG00000030849, ENSMUSG00000045948,…	1.34918	0.222324	2.65301
PANTHER_BP_ALL	BP00224:Cell proliferation and differentiation	47	0.000536823	ENSMUSG00000028967, ENSMUSG00000052135, ENSMUSG00000071341, ENSMUSG00000020053, ENSMUSG00000037235, ENSMUSG00000021701, ENSMUSG00000025402, ENSMUSG00000028389, ENSMUSG00000021457, ENSMUSG00000019370, ENSMUSG00000000489, ENSMUSG00000020246, ENSMUSG00000003382, ENSMUSG00000029544, ENSMUSG00000015312, ENSMUSG00000024486, ENSMUSG00000030584, ENSMUSG00000047904, ENSMUSG00000027298, ENSMUSG00000025856,…	1.68541	0.654871	2.18384
PANTHER_BP_ALL	BP00111:Intracellular signaling cascade	44	0.00105786	ENSMUSG00000016179, ENSMUSG00000031442, ENSMUSG00000030357, ENSMUSG00000053137, ENSMUSG00000013646, ENSMUSG00000022951, ENSMUSG00000038485, ENSMUSG00000021701, ENSMUSG00000021457, ENSMUSG00000019370, ENSMUSG00000000489, ENSMUSG00000029544, ENSMUSG00000015312, ENSMUSG00000032402, ENSMUSG00000038291, ENSMUSG00000027581, ENSMUSG00000025856, ENSMUSG00000024222, ENSMUSG00000000531, ENSMUSG00000037926,…	1.66675	1.28672	1.89052
PANTHER_BP_ALL	BP00178:Stress response	16	0.00149523	ENSMUSG00000021037, ENSMUSG00000021025, ENSMUSG00000024966, ENSMUSG00000015656, ENSMUSG00000028341, ENSMUSG00000053004, ENSMUSG00000026864, ENSMUSG00000041769, ENSMUSG00000015312, ENSMUSG00000038205, ENSMUSG00000016528, ENSMUSG00000056501, ENSMUSG00000031068, ENSMUSG00000004951, ENSMUSG00000059991, ENSMUSG00000032115	2.56589	1.81425	1.7413
PANTHER_BP_ALL	BP00125:Intracellular protein traffic	46	0.0014991	ENSMUSG00000028385, ENSMUSG00000005674, ENSMUSG00000053841, ENSMUSG00000021484, ENSMUSG00000063146, ENSMUSG00000037416, ENSMUSG00000003037, ENSMUSG00000047547, ENSMUSG00000034936, ENSMUSG00000056429, ENSMUSG00000042429, ENSMUSG00000017418, ENSMUSG00000030082, ENSMUSG00000038291, ENSMUSG00000057069, ENSMUSG00000026202, ENSMUSG00000022765, ENSMUSG00000035226, ENSMUSG00000031788, ENSMUSG00000005069,…	1.61473	1.8189	1.74019
PANTHER_BP_ALL	BP00276:General vesicle transport	18	0.0016985	ENSMUSG00000021062, ENSMUSG00000047694, ENSMUSG00000053841, ENSMUSG00000063146, ENSMUSG00000015214, ENSMUSG00000032220, ENSMUSG00000003037, ENSMUSG00000020440, ENSMUSG00000020088, ENSMUSG00000030704, ENSMUSG00000024072, ENSMUSG00000034936, ENSMUSG00000017418, ENSMUSG00000057069, ENSMUSG00000022765, ENSMUSG00000018401, ENSMUSG00000062421, ENSMUSG00000035226	2.35961	2.05854	1.68644
PANTHER_BP_ALL	BP00114:MAPKKK cascade	14	0.00495794	ENSMUSG00000034613, ENSMUSG00000031530, ENSMUSG00000017376, ENSMUSG00000015312, ENSMUSG00000020601, ENSMUSG00000038894, ENSMUSG00000053716, ENSMUSG00000021224, ENSMUSG00000030199, ENSMUSG00000053137, ENSMUSG00000016528, ENSMUSG00000024558, ENSMUSG00000018648, ENSMUSG00000019960	2.44362	5.90032	1.22912
PANTHER_BP_ALL	BP00207:Cell cycle control	23	0.0064267	ENSMUSG00000003545, ENSMUSG00000037112, ENSMUSG00000052135, ENSMUSG00000024789, ENSMUSG00000030357, ENSMUSG00000029635, ENSMUSG00000027660, ENSMUSG00000028086, ENSMUSG00000027646, ENSMUSG00000031530, ENSMUSG00000026313, ENSMUSG00000015312, ENSMUSG00000021250, ENSMUSG00000024780, ENSMUSG00000030584, ENSMUSG00000014361, ENSMUSG00000027298, ENSMUSG00000004056, ENSMUSG00000025856, ENSMUSG00000041297,…	1.86315	7.58584	1.12
PANTHER_BP_ALL	BP00108:Receptor protein tyrosine kinase signaling pathway	14	0.0111515	ENSMUSG00000027540, ENSMUSG00000048482, ENSMUSG00000027560, ENSMUSG00000066877, ENSMUSG00000024789, ENSMUSG00000028876, ENSMUSG00000031217, ENSMUSG00000030849, ENSMUSG00000000489, ENSMUSG00000074129, ENSMUSG00000024539, ENSMUSG00000014361, ENSMUSG00000027298, ENSMUSG00000025856	2.21148	12.8217
PANTHER_BP_ALL	BP00203:Cell cycle	41	0.0122429	ENSMUSG00000037112, ENSMUSG00000052135, ENSMUSG00000063146, ENSMUSG00000025147, ENSMUSG00000030357, ENSMUSG00000029635, ENSMUSG00000039485, ENSMUSG00000019370, ENSMUSG00000008384, ENSMUSG00000029544, ENSMUSG00000015312, ENSMUSG00000030584, ENSMUSG00000026202, ENSMUSG00000027298, ENSMUSG00000025856, ENSMUSG00000004056, ENSMUSG00000023067, ENSMUSG00000024222, ENSMUSG00000037351, ENSMUSG00000028896,…	1.47696	13.9918
PANTHER_BP_ALL	BP00044:mRNA transcription regulation	58	0.0203915	ENSMUSG00000071341, ENSMUSG00000033730, ENSMUSG00000018476, ENSMUSG00000028341, ENSMUSG00000039987, ENSMUSG00000029135, ENSMUSG00000037235, ENSMUSG00000038418, ENSMUSG00000028389, ENSMUSG00000025402, ENSMUSG00000039671, ENSMUSG00000024528, ENSMUSG00000037868, ENSMUSG00000032402, ENSMUSG00000030584, ENSMUSG00000031609, ENSMUSG00000059475, ENSMUSG00000042406, ENSMUSG00000033863, ENSMUSG00000021025,…	1.33069	22.2822
PANTHER_BP_ALL	BP00269:Glucose homeostasis	4	0.0208167	ENSMUSG00000027540, ENSMUSG00000038894, ENSMUSG00000024539, ENSMUSG00000038485	6.65105	22.694
PANTHER_MF_ALL	MF00107:Kinase	43	9.63911e-06	ENSMUSG00000016179, ENSMUSG00000024242, ENSMUSG00000037112, ENSMUSG00000032294, ENSMUSG00000020032, ENSMUSG00000050271, ENSMUSG00000029635, ENSMUSG00000053137, ENSMUSG00000013646, ENSMUSG00000028862, ENSMUSG00000021701, ENSMUSG00000021457, ENSMUSG00000024014, ENSMUSG00000026558, ENSMUSG00000027298, ENSMUSG00000038145, ENSMUSG00000004056, ENSMUSG00000042608, ENSMUSG00000060477, ENSMUSG00000024576,…	2.07951	0.0116754	3.93273
PANTHER_MF_ALL	MF00108:Protein kinase	36	1.6042e-05	ENSMUSG00000016179, ENSMUSG00000024242, ENSMUSG00000037112, ENSMUSG00000020032, ENSMUSG00000050271, ENSMUSG00000029635, ENSMUSG00000053137, ENSMUSG00000028862, ENSMUSG00000021701, ENSMUSG00000021457, ENSMUSG00000024014, ENSMUSG00000027298, ENSMUSG00000038145, ENSMUSG00000004056, ENSMUSG00000042608, ENSMUSG00000060477, ENSMUSG00000024576, ENSMUSG00000042978, ENSMUSG00000017376, ENSMUSG00000024789,…	2.21639	0.0194302	3.71152
PANTHER_MF_ALL	MF00077:Chaperone	17	3.3842e-05	ENSMUSG00000021037, ENSMUSG00000028035, ENSMUSG00000030357, ENSMUSG00000036052, ENSMUSG00000015656, ENSMUSG00000039485, ENSMUSG00000004460, ENSMUSG00000005483, ENSMUSG00000026864, ENSMUSG00000022403, ENSMUSG00000024780, ENSMUSG00000026740, ENSMUSG00000026203, ENSMUSG00000024222, ENSMUSG00000004951, ENSMUSG00000029657, ENSMUSG00000032115	3.45193	0.0409857	3.38737
PANTHER_MF_ALL	MF00113:Phosphatase	19	0.000863764	ENSMUSG00000034613, ENSMUSG00000037926, ENSMUSG00000026617, ENSMUSG00000026626, ENSMUSG00000027540, ENSMUSG00000015214, ENSMUSG00000018648, ENSMUSG00000039661, ENSMUSG00000026102, ENSMUSG00000041769, ENSMUSG00000031530, ENSMUSG00000025192, ENSMUSG00000053716, ENSMUSG00000024539, ENSMUSG00000024213, ENSMUSG00000018401, ENSMUSG00000019960, ENSMUSG00000049225, ENSMUSG00000023805	2.43586	1.04129	1.98243
PANTHER_MF_ALL	MF00079:Other chaperones	10	0.00121856	ENSMUSG00000021037, ENSMUSG00000026740, ENSMUSG00000024780, ENSMUSG00000028035, ENSMUSG00000030357, ENSMUSG00000036052, ENSMUSG00000024222, ENSMUSG00000004951, ENSMUSG00000004460, ENSMUSG00000005483	3.80137	1.46611	1.83383
PANTHER_MF_ALL	MF00039:Other transcription factor	22	0.00275542	ENSMUSG00000003545, ENSMUSG00000022895, ENSMUSG00000052135, ENSMUSG00000027660, ENSMUSG00000029135, ENSMUSG00000013089, ENSMUSG00000034271, ENSMUSG00000015605, ENSMUSG00000003382, ENSMUSG00000024081, ENSMUSG00000008384, ENSMUSG00000056749, ENSMUSG00000024528, ENSMUSG00000021250, ENSMUSG00000032402, ENSMUSG00000022389, ENSMUSG00000004661, ENSMUSG00000030199, ENSMUSG00000038132, ENSMUSG00000056501,…	2.04324	3.28706	1.48319
PANTHER_MF_ALL	MF00099:Small GTPase	15	0.00293853	ENSMUSG00000021062, ENSMUSG00000054855, ENSMUSG00000003037, ENSMUSG00000017144, ENSMUSG00000020440, ENSMUSG00000028214, ENSMUSG00000030704, ENSMUSG00000004451, ENSMUSG00000020088, ENSMUSG00000034936, ENSMUSG00000017418, ENSMUSG00000022075, ENSMUSG00000031880, ENSMUSG00000062421, ENSMUSG00000032470	2.48922	3.50195	1.45569
PANTHER_MF_ALL	MF00114:Protein phosphatase	12	0.00356366	ENSMUSG00000034613, ENSMUSG00000037926, ENSMUSG00000041769, ENSMUSG00000031530, ENSMUSG00000027540, ENSMUSG00000026626, ENSMUSG00000053716, ENSMUSG00000024539, ENSMUSG00000018648, ENSMUSG00000019960, ENSMUSG00000049225, ENSMUSG00000039661	2.82231	4.23226	1.37343
PANTHER_MF_ALL	MF00036:Transcription factor	78	0.00696288	ENSMUSG00000006215, ENSMUSG00000071341, ENSMUSG00000033730, ENSMUSG00000018476, ENSMUSG00000050855, ENSMUSG00000028341, ENSMUSG00000029135, ENSMUSG00000039987, ENSMUSG00000037235, ENSMUSG00000038418, ENSMUSG00000025402, ENSMUSG00000028389, ENSMUSG00000039671, ENSMUSG00000026439, ENSMUSG00000039789, ENSMUSG00000024528, ENSMUSG00000037868, ENSMUSG00000032402, ENSMUSG00000014470, ENSMUSG00000004661,…	1.32672	8.11549	1.09069
PANTHER_MF_ALL	MF00209:Hsp 70 family chaperone	4	0.00799881	ENSMUSG00000015656, ENSMUSG00000029657, ENSMUSG00000032115, ENSMUSG00000026864	9.34051	9.26986	1.03293
PANTHER_MF_ALL	MF00097:G-protein	17	0.00808748	ENSMUSG00000021062, ENSMUSG00000000001, ENSMUSG00000054855, ENSMUSG00000003037, ENSMUSG00000017144, ENSMUSG00000020440, ENSMUSG00000028214, ENSMUSG00000030704, ENSMUSG00000004451, ENSMUSG00000020088, ENSMUSG00000034936, ENSMUSG00000040009, ENSMUSG00000017418, ENSMUSG00000022075, ENSMUSG00000031880, ENSMUSG00000062421, ENSMUSG00000032470	2.0815	9.36806	1.02835
PANTHER_MF_ALL	MF00213:Non-receptor serine/threonine protein kinase	19	0.00853763	ENSMUSG00000016179, ENSMUSG00000024576, ENSMUSG00000037112, ENSMUSG00000017376, ENSMUSG00000020032, ENSMUSG00000029635, ENSMUSG00000053137, ENSMUSG00000021701, ENSMUSG00000032380, ENSMUSG00000027797, ENSMUSG00000024042, ENSMUSG00000016528, ENSMUSG00000024558, ENSMUSG00000004056, ENSMUSG00000038145, ENSMUSG00000041297, ENSMUSG00000074886, ENSMUSG00000003345, ENSMUSG00000029053	1.96565	9.86502	1.0059
PANTHER_MF_ALL	MF00122:Other synthase/synthetase	3	0.0176303	ENSMUSG00000040451, ENSMUSG00000031485, ENSMUSG00000025981	14.0108	19.3833
KEGG_PATHWAY	mmu04010:MAPK signaling pathway	25	3.42074e-06	ENSMUSG00000024242, ENSMUSG00000048482, ENSMUSG00000053137, ENSMUSG00000015656, ENSMUSG00000028862, ENSMUSG00000000489, ENSMUSG00000015312, ENSMUSG00000025408, ENSMUSG00000002307, ENSMUSG00000004056, ENSMUSG00000025856, ENSMUSG00000042406, ENSMUSG00000017376, ENSMUSG00000018909, ENSMUSG00000030849, ENSMUSG00000018648, ENSMUSG00000015605, ENSMUSG00000021253, ENSMUSG00000031530, ENSMUSG00000021250,…	2.91033	0.00403098	4.39459
KEGG_PATHWAY	mmu04920:Adipocytokine signaling pathway	9	0.00128437	ENSMUSG00000038205, ENSMUSG00000021025, ENSMUSG00000038894, ENSMUSG00000028645, ENSMUSG00000024789, ENSMUSG00000004056, ENSMUSG00000032883, ENSMUSG00000030168, ENSMUSG00000026457	4.14396	1.50308	1.82302
KEGG_PATHWAY	mmu05200:Pathways in cancer	21	0.00351512	ENSMUSG00000033933, ENSMUSG00000021025, ENSMUSG00000020053, ENSMUSG00000030849, ENSMUSG00000032380, ENSMUSG00000024096, ENSMUSG00000000489, ENSMUSG00000004451, ENSMUSG00000066687, ENSMUSG00000021253, ENSMUSG00000058709, ENSMUSG00000021250, ENSMUSG00000032402, ENSMUSG00000028645, ENSMUSG00000074129, ENSMUSG00000007989, ENSMUSG00000007659, ENSMUSG00000004056, ENSMUSG00000025856, ENSMUSG00000023067,…	2.00569	4.06466	1.39098
KEGG_PATHWAY	mmu05020:Prion diseases	6	0.00488063	ENSMUSG00000036887, ENSMUSG00000024966, ENSMUSG00000036905, ENSMUSG00000038418, ENSMUSG00000026864, ENSMUSG00000036896	5.28848	5.60244	1.25162
KEGG_PATHWAY	mmu04710:Circadian rhythm	4	0.00742772	ENSMUSG00000020893, ENSMUSG00000055866, ENSMUSG00000020038, ENSMUSG00000030103	9.49214	8.41075	1.07517
KEGG_PATHWAY	mmu04722:Neurotrophin signaling pathway	10	0.0239589	ENSMUSG00000021025, ENSMUSG00000048482, ENSMUSG00000038894, ENSMUSG00000035529, ENSMUSG00000053137, ENSMUSG00000016528, ENSMUSG00000004056, ENSMUSG00000019370, ENSMUSG00000042406, ENSMUSG00000060477	2.37304	24.8567
DOWN
Category	Term	Count	un-adjusted p-value	Genes	Fold Enrichment	FDR [%]	-log10 (FDR/100)
GOTERM_BP_5	GO:0045596~negative regulation of cell differentiation	10	0.00168719	ENSMUSG00000032558, ENSMUSG00000026923, ENSMUSG00000031760, ENSMUSG00000000567, ENSMUSG00000037573, ENSMUSG00000048001, ENSMUSG00000039410, ENSMUSG00000074637, ENSMUSG00000039239, ENSMUSG00000021318	3.64479	2.56489	1.59093
GOTERM_BP_5	GO:0007507~heart development	11	0.00198709	ENSMUSG00000022672, ENSMUSG00000010175, ENSMUSG00000059588, ENSMUSG00000026923, ENSMUSG00000000567, ENSMUSG00000025076, ENSMUSG00000026556, ENSMUSG00000039239, ENSMUSG00000021318, ENSMUSG00000027684, ENSMUSG00000025579	3.27214	3.01431	1.52081
GOTERM_BP_5	GO:0060429~epithelium development	12	0.0025853	ENSMUSG00000010175, ENSMUSG00000026923, ENSMUSG00000037016, ENSMUSG00000000567, ENSMUSG00000016028, ENSMUSG00000041703, ENSMUSG00000062960, ENSMUSG00000005268, ENSMUSG00000019768, ENSMUSG00000026556, ENSMUSG00000021318, ENSMUSG00000027684	2.93735	3.90499	1.40838
GOTERM_BP_5	GO:0002009~morphogenesis of an epithelium	9	0.00453992	ENSMUSG00000010175, ENSMUSG00000026923, ENSMUSG00000037016, ENSMUSG00000000567, ENSMUSG00000016028, ENSMUSG00000041703, ENSMUSG00000019768, ENSMUSG00000026556, ENSMUSG00000021318	3.45096	6.76221	1.16991
GOTERM_BP_5	GO:0045137~development of primary sexual characteristics	7	0.00472229	ENSMUSG00000000567, ENSMUSG00000019230, ENSMUSG00000041147, ENSMUSG00000062960, ENSMUSG00000000957, ENSMUSG00000019768, ENSMUSG00000074637	4.46486	7.0247	1.15337
GOTERM_BP_5	GO:0048663~neuron fate commitment	5	0.00527793	ENSMUSG00000026923, ENSMUSG00000048001, ENSMUSG00000074637, ENSMUSG00000039239, ENSMUSG00000021318	7.05693	7.82021	1.10678
GOTERM_BP_5	GO:0045839~negative regulation of mitosis	3	0.00589948	ENSMUSG00000019768, ENSMUSG00000024542, ENSMUSG00000045328	24.8757	8.70252	1.06035
GOTERM_BP_5	GO:0051784~negative regulation of nuclear division	3	0.00589948	ENSMUSG00000019768, ENSMUSG00000024542, ENSMUSG00000045328	24.8757	8.70252	1.06035
GOTERM_BP_5	GO:0000902~cell morphogenesis	12	0.00681835	ENSMUSG00000010175, ENSMUSG00000026923, ENSMUSG00000068748, ENSMUSG00000030447, ENSMUSG00000000567, ENSMUSG00000070047, ENSMUSG00000028864, ENSMUSG00000033214, ENSMUSG00000022150, ENSMUSG00000026556, ENSMUSG00000039239, ENSMUSG00000021318	2.57612	9.99245	1.00033
GOTERM_BP_5	GO:0042135~neurotransmitter catabolic process	3	0.00751057	ENSMUSG00000025037, ENSMUSG00000043943, ENSMUSG00000057880	22.1117	10.9529
GOTERM_BP_5	GO:0008585~female gonad development	5	0.0080843	ENSMUSG00000019230, ENSMUSG00000041147, ENSMUSG00000062960, ENSMUSG00000000957, ENSMUSG00000019768	6.25803	11.7417
GOTERM_BP_5	GO:0048729~tissue morphogenesis	10	0.00971945	ENSMUSG00000010175, ENSMUSG00000026923, ENSMUSG00000037016, ENSMUSG00000000567, ENSMUSG00000016028, ENSMUSG00000041703, ENSMUSG00000019768, ENSMUSG00000026556, ENSMUSG00000039239, ENSMUSG00000021318	2.78719	13.9541
GOTERM_BP_5	GO:0008406~gonad development	6	0.0103207	ENSMUSG00000000567, ENSMUSG00000019230, ENSMUSG00000041147, ENSMUSG00000062960, ENSMUSG00000000957, ENSMUSG00000019768	4.52285	14.7545
GOTERM_BP_5	GO:0046545~development of primary female sexual characteristics	5	0.0104139	ENSMUSG00000019230, ENSMUSG00000041147, ENSMUSG00000062960, ENSMUSG00000000957, ENSMUSG00000019768	5.81887	14.878
GOTERM_BP_5	GO:0001708~cell fate specification	5	0.0117257	ENSMUSG00000026923, ENSMUSG00000031665, ENSMUSG00000000567, ENSMUSG00000074637, ENSMUSG00000021318	5.62162	16.5978
GOTERM_BP_5	GO:0045787~positive regulation of cell cycle	4	0.0141086	ENSMUSG00000010175, ENSMUSG00000041147, ENSMUSG00000039239, ENSMUSG00000045328	7.80413	19.639
GOTERM_BP_5	GO:0000904~cell morphogenesis involved in differentiation	9	0.014622	ENSMUSG00000010175, ENSMUSG00000026923, ENSMUSG00000068748, ENSMUSG00000030447, ENSMUSG00000000567, ENSMUSG00000033214, ENSMUSG00000022150, ENSMUSG00000039239, ENSMUSG00000021318	2.81611	20.2806
GOTERM_BP_5	GO:0022008~neurogenesis	16	0.0151695	ENSMUSG00000031760, ENSMUSG00000026923, ENSMUSG00000048001, ENSMUSG00000053646, ENSMUSG00000000957, ENSMUSG00000019843, ENSMUSG00000074637, ENSMUSG00000020423, ENSMUSG00000068748, ENSMUSG00000030447, ENSMUSG00000032356, ENSMUSG00000033214, ENSMUSG00000039410, ENSMUSG00000039239, ENSMUSG00000021318, ENSMUSG00000056854	1.97647	20.9595
GOTERM_BP_5	GO:0046660~female sex differentiation	5	0.0154556	ENSMUSG00000019230, ENSMUSG00000041147, ENSMUSG00000062960, ENSMUSG00000000957, ENSMUSG00000019768	5.18243	21.3121
GOTERM_BP_5	GO:0060736~prostate gland growth	3	0.0156451	ENSMUSG00000000567, ENSMUSG00000005268, ENSMUSG00000019768	15.3081	21.5448
GOTERM_CC_5	GO:0044459~plasma membrane part	38	0.00992857	ENSMUSG00000054889, ENSMUSG00000075316, ENSMUSG00000036334, ENSMUSG00000042616, ENSMUSG00000019809, ENSMUSG00000024617, ENSMUSG00000036353, ENSMUSG00000026247, ENSMUSG00000042604, ENSMUSG00000025037, ENSMUSG00000054667, ENSMUSG00000048240, ENSMUSG00000025170, ENSMUSG00000071658, ENSMUSG00000053693, ENSMUSG00000026556, ENSMUSG00000025321, ENSMUSG00000060961, ENSMUSG00000026923, ENSMUSG00000041378,…	1.50716	11.6823
GOTERM_CC_5	GO:0005887~integral to plasma membrane	16	0.0171813	ENSMUSG00000026923, ENSMUSG00000075316, ENSMUSG00000036334, ENSMUSG00000058897, ENSMUSG00000019809, ENSMUSG00000036353, ENSMUSG00000026247, ENSMUSG00000042604, ENSMUSG00000016028, ENSMUSG00000020524, ENSMUSG00000030307, ENSMUSG00000024620, ENSMUSG00000062960, ENSMUSG00000015243, ENSMUSG00000025321, ENSMUSG00000060961	1.95158	19.4078
GOTERM_MF_5	GO:0046914~transition metal ion binding	60	0.00335079	ENSMUSG00000045817, ENSMUSG00000068551, ENSMUSG00000043943, ENSMUSG00000060579, ENSMUSG00000006019, ENSMUSG00000022708, ENSMUSG00000043635, ENSMUSG00000070866, ENSMUSG00000026579, ENSMUSG00000025964, ENSMUSG00000021318, ENSMUSG00000034040, ENSMUSG00000042851, ENSMUSG00000073423, ENSMUSG00000020380, ENSMUSG00000030226, ENSMUSG00000066829, ENSMUSG00000041000, ENSMUSG00000024292, ENSMUSG00000019768,…	1.39153	3.6962	1.43224
GOTERM_MF_5	GO:0032559~adenyl ribonucleotide binding	35	0.0207162	ENSMUSG00000032489, ENSMUSG00000062825, ENSMUSG00000020788, ENSMUSG00000038967, ENSMUSG00000036334, ENSMUSG00000000823, ENSMUSG00000006019, ENSMUSG00000028292, ENSMUSG00000056752, ENSMUSG00000031853, ENSMUSG00000024617, ENSMUSG00000050697, ENSMUSG00000021646, ENSMUSG00000021180, ENSMUSG00000041440, ENSMUSG00000053693, ENSMUSG00000042010, ENSMUSG00000035202, ENSMUSG00000024899, ENSMUSG00000020380,…	1.44999	20.9349
PANTHER_BP_ALL	BP00199:Neurogenesis	17	0.00625039	ENSMUSG00000010175, ENSMUSG00000026923, ENSMUSG00000041703, ENSMUSG00000019230, ENSMUSG00000055639, ENSMUSG00000048001, ENSMUSG00000019843, ENSMUSG00000038872, ENSMUSG00000031925, ENSMUSG00000016028, ENSMUSG00000070047, ENSMUSG00000025370, ENSMUSG00000044167, ENSMUSG00000052713, ENSMUSG00000050505, ENSMUSG00000021318, ENSMUSG00000032744	2.12689	7.05997	1.1512
PANTHER_BP_ALL	BP00246:Ectoderm development	18	0.00942709	ENSMUSG00000010175, ENSMUSG00000026923, ENSMUSG00000041703, ENSMUSG00000019230, ENSMUSG00000055639, ENSMUSG00000048001, ENSMUSG00000019843, ENSMUSG00000038872, ENSMUSG00000031925, ENSMUSG00000016028, ENSMUSG00000038156, ENSMUSG00000070047, ENSMUSG00000025370, ENSMUSG00000044167, ENSMUSG00000052713, ENSMUSG00000050505, ENSMUSG00000021318, ENSMUSG00000032744	1.97862	10.4706
PANTHER_BP_ALL	BP00120:Cell adhesion-mediated signaling	12	0.0132116	ENSMUSG00000026923, ENSMUSG00000016028, ENSMUSG00000043635, ENSMUSG00000070047, ENSMUSG00000046743, ENSMUSG00000035566, ENSMUSG00000036334, ENSMUSG00000025370, ENSMUSG00000025321, ENSMUSG00000025964, ENSMUSG00000050505, ENSMUSG00000041577	2.35575	14.3844
PANTHER_BP_ALL	BP00193:Developmental processes	41	0.0190931	ENSMUSG00000032489, ENSMUSG00000041703, ENSMUSG00000019230, ENSMUSG00000056752, ENSMUSG00000024617, ENSMUSG00000031665, ENSMUSG00000031925, ENSMUSG00000021180, ENSMUSG00000044167, ENSMUSG00000039239, ENSMUSG00000051351, ENSMUSG00000021318, ENSMUSG00000056854, ENSMUSG00000033569, ENSMUSG00000010175, ENSMUSG00000026923, ENSMUSG00000014850, ENSMUSG00000055639, ENSMUSG00000033949, ENSMUSG00000048001,…	1.41026	20.1571
PANTHER_BP_ALL	BP00285:Cell structure and motility	23	0.0223431	ENSMUSG00000026923, ENSMUSG00000040940, ENSMUSG00000062825, ENSMUSG00000041378, ENSMUSG00000039552, ENSMUSG00000058897, ENSMUSG00000019768, ENSMUSG00000035954, ENSMUSG00000052374, ENSMUSG00000031853, ENSMUSG00000039637, ENSMUSG00000056752, ENSMUSG00000039179, ENSMUSG00000055013, ENSMUSG00000022091, ENSMUSG00000016028, ENSMUSG00000022272, ENSMUSG00000024620, ENSMUSG00000038156, ENSMUSG00000070047,…	1.64148	23.192
PANTHER_MF_ALL	MF00264:Microtubule family cytoskeletal protein	12	0.000293695	ENSMUSG00000032558, ENSMUSG00000032489, ENSMUSG00000022442, ENSMUSG00000031516, ENSMUSG00000039552, ENSMUSG00000020799, ENSMUSG00000024059, ENSMUSG00000041144, ENSMUSG00000056752, ENSMUSG00000039179, ENSMUSG00000019027, ENSMUSG00000045328	3.8471	0.343778	2.46372
PANTHER_MF_ALL	MF00231:Microtubule binding motor protein	6	0.00293955	ENSMUSG00000032489, ENSMUSG00000031516, ENSMUSG00000041144, ENSMUSG00000056752, ENSMUSG00000019027, ENSMUSG00000045328	6.10518	3.39244	1.46949
PANTHER_MF_ALL	MF00222:Zinc finger transcription factor	21	0.0125208	ENSMUSG00000066829, ENSMUSG00000041703, ENSMUSG00000068551, ENSMUSG00000019230, ENSMUSG00000054939, ENSMUSG00000000823, ENSMUSG00000027684, ENSMUSG00000022708, ENSMUSG00000030757, ENSMUSG00000038872, ENSMUSG00000056459, ENSMUSG00000031665, ENSMUSG00000010505, ENSMUSG00000062861, ENSMUSG00000045333, ENSMUSG00000062470, ENSMUSG00000039087, ENSMUSG00000039410, ENSMUSG00000051351, ENSMUSG00000021318,…	1.80024	13.7324
PANTHER_MF_ALL	MF00259:Cadherin	6	0.0144259	ENSMUSG00000016028, ENSMUSG00000070047, ENSMUSG00000046743, ENSMUSG00000035566, ENSMUSG00000025370, ENSMUSG00000050505	4.17086	15.6636
PANTHER_MF_ALL	MF00107:Kinase	18	0.0159528	ENSMUSG00000045257, ENSMUSG00000038967, ENSMUSG00000053646, ENSMUSG00000019843, ENSMUSG00000031853, ENSMUSG00000050697, ENSMUSG00000024617, ENSMUSG00000022672, ENSMUSG00000024620, ENSMUSG00000029049, ENSMUSG00000062960, ENSMUSG00000039934, ENSMUSG00000021180, ENSMUSG00000041440, ENSMUSG00000053693, ENSMUSG00000031303, ENSMUSG00000053414, ENSMUSG00000024899	1.86948	17.1827
KEGG_PATHWAY	--
COMBINED
Category	Term	Count	un-adjusted p-value	Genes	Fold Enrichment	FDR [%]	-log10 (FDR/100)
GOTERM_BP_5	GO:0006464~protein modification process	104	7.11767e-08	ENSMUSG00000053137, ENSMUSG00000036334, ENSMUSG00000021457, ENSMUSG00000037470, ENSMUSG00000030062, ENSMUSG00000053693, ENSMUSG00000039239, ENSMUSG00000049225, ENSMUSG00000034613, ENSMUSG00000022442, ENSMUSG00000024789, ENSMUSG00000030849, ENSMUSG00000018648, ENSMUSG00000027646, ENSMUSG00000051590, ENSMUSG00000020601, ENSMUSG00000053716, ENSMUSG00000015243, ENSMUSG00000024558, ENSMUSG00000031303,…	1.68821	0.000116755	5.93272
GOTERM_BP_5	GO:0031326~regulation of cellular biosynthetic process	170	6.676e-07	ENSMUSG00000055044, ENSMUSG00000068551, ENSMUSG00000071341, ENSMUSG00000050855, ENSMUSG00000038418, ENSMUSG00000025402, ENSMUSG00000021457, ENSMUSG00000028389, ENSMUSG00000028842, ENSMUSG00000022708, ENSMUSG00000052707, ENSMUSG00000037868, ENSMUSG00000025408, ENSMUSG00000048240, ENSMUSG00000059475, ENSMUSG00000021318, ENSMUSG00000027582, ENSMUSG00000073423, ENSMUSG00000025316, ENSMUSG00000066829,…	1.40943	0.0010951	4.96055
GOTERM_BP_5	GO:0019219~regulation of nucleobase, nucleoside, nucleotide and nucleic acid metabolic process	163	9.31614e-07	ENSMUSG00000055044, ENSMUSG00000068551, ENSMUSG00000045817, ENSMUSG00000071341, ENSMUSG00000050855, ENSMUSG00000038418, ENSMUSG00000025402, ENSMUSG00000028389, ENSMUSG00000022708, ENSMUSG00000037868, ENSMUSG00000025408, ENSMUSG00000048240, ENSMUSG00000059475, ENSMUSG00000021318, ENSMUSG00000027582, ENSMUSG00000073423, ENSMUSG00000025316, ENSMUSG00000066829, ENSMUSG00000024256, ENSMUSG00000024955,…	1.41687	0.00152817	4.81583
GOTERM_BP_5	GO:0044267~cellular protein metabolic process	147	1.67109e-06	ENSMUSG00000053137, ENSMUSG00000000740, ENSMUSG00000036334, ENSMUSG00000015656, ENSMUSG00000021457, ENSMUSG00000032905, ENSMUSG00000037470, ENSMUSG00000041264, ENSMUSG00000030062, ENSMUSG00000053693, ENSMUSG00000039239, ENSMUSG00000035202, ENSMUSG00000049225, ENSMUSG00000025290, ENSMUSG00000034613, ENSMUSG00000022442, ENSMUSG00000024789, ENSMUSG00000030849, ENSMUSG00000045948, ENSMUSG00000018648,…	1.43996	0.00274114	4.56207
GOTERM_BP_5	GO:0010556~regulation of macromolecule biosynthetic process	163	1.96226e-06	ENSMUSG00000055044, ENSMUSG00000068551, ENSMUSG00000071341, ENSMUSG00000050855, ENSMUSG00000038418, ENSMUSG00000025402, ENSMUSG00000021457, ENSMUSG00000028389, ENSMUSG00000028842, ENSMUSG00000022708, ENSMUSG00000052707, ENSMUSG00000037868, ENSMUSG00000025408, ENSMUSG00000059475, ENSMUSG00000021318, ENSMUSG00000027582, ENSMUSG00000073423, ENSMUSG00000025316, ENSMUSG00000066829, ENSMUSG00000024955,…	1.40021	0.00321877	4.49231
GOTERM_BP_5	GO:0045449~regulation of transcription	154	2.41867e-06	ENSMUSG00000055044, ENSMUSG00000068551, ENSMUSG00000071341, ENSMUSG00000050855, ENSMUSG00000038418, ENSMUSG00000025402, ENSMUSG00000028389, ENSMUSG00000022708, ENSMUSG00000037868, ENSMUSG00000025408, ENSMUSG00000059475, ENSMUSG00000021318, ENSMUSG00000027582, ENSMUSG00000073423, ENSMUSG00000025316, ENSMUSG00000066829, ENSMUSG00000024955, ENSMUSG00000020484, ENSMUSG00000013089, ENSMUSG00000019768,…	1.41438	0.00396742	4.40149
GOTERM_BP_5	GO:0010468~regulation of gene expression	165	2.67208e-06	ENSMUSG00000055044, ENSMUSG00000068551, ENSMUSG00000045817, ENSMUSG00000071341, ENSMUSG00000050855, ENSMUSG00000038418, ENSMUSG00000025402, ENSMUSG00000028389, ENSMUSG00000028842, ENSMUSG00000022708, ENSMUSG00000052707, ENSMUSG00000037868, ENSMUSG00000025408, ENSMUSG00000059475, ENSMUSG00000021318, ENSMUSG00000027582, ENSMUSG00000073423, ENSMUSG00000025316, ENSMUSG00000066829, ENSMUSG00000024955,…	1.38938	0.00438308	4.35822
GOTERM_BP_5	GO:0007167~enzyme linked receptor protein signaling pathway	32	1.0207e-05	ENSMUSG00000037112, ENSMUSG00000020053, ENSMUSG00000028864, ENSMUSG00000036334, ENSMUSG00000038485, ENSMUSG00000021457, ENSMUSG00000028907, ENSMUSG00000000489, ENSMUSG00000024486, ENSMUSG00000032402, ENSMUSG00000048240, ENSMUSG00000021765, ENSMUSG00000025856, ENSMUSG00000044167, ENSMUSG00000039239, ENSMUSG00000017376, ENSMUSG00000037573, ENSMUSG00000027540, ENSMUSG00000024789, ENSMUSG00000027560,…	2.39746	0.0167419	3.7762
GOTERM_BP_5	GO:0007242~intracellular signaling cascade	72	5.70154e-05	ENSMUSG00000031442, ENSMUSG00000030357, ENSMUSG00000053137, ENSMUSG00000022951, ENSMUSG00000003037, ENSMUSG00000017144, ENSMUSG00000021457, ENSMUSG00000004451, ENSMUSG00000034936, ENSMUSG00000015312, ENSMUSG00000017418, ENSMUSG00000047904, ENSMUSG00000002307, ENSMUSG00000027581, ENSMUSG00000053693, ENSMUSG00000038611, ENSMUSG00000060477, ENSMUSG00000033863, ENSMUSG00000021062, ENSMUSG00000035711,…	1.60944	0.0934845	3.02926
GOTERM_BP_5	GO:0016310~phosphorylation	57	0.000316758	ENSMUSG00000020032, ENSMUSG00000038967, ENSMUSG00000053137, ENSMUSG00000036334, ENSMUSG00000021457, ENSMUSG00000050697, ENSMUSG00000015312, ENSMUSG00000024014, ENSMUSG00000027298, ENSMUSG00000038145, ENSMUSG00000053693, ENSMUSG00000039239, ENSMUSG00000060477, ENSMUSG00000024789, ENSMUSG00000028876, ENSMUSG00000030849, ENSMUSG00000027646, ENSMUSG00000022672, ENSMUSG00000051590, ENSMUSG00000020601,…	1.62373	0.51833	2.28539
GOTERM_BP_5	GO:0010558~negative regulation of macromolecule biosynthetic process	38	0.000330193	ENSMUSG00000040363, ENSMUSG00000018476, ENSMUSG00000036052, ENSMUSG00000035877, ENSMUSG00000037235, ENSMUSG00000074637, ENSMUSG00000028842, ENSMUSG00000038418, ENSMUSG00000025402, ENSMUSG00000003382, ENSMUSG00000052707, ENSMUSG00000000567, ENSMUSG00000032402, ENSMUSG00000031609, ENSMUSG00000002307, ENSMUSG00000039410, ENSMUSG00000021318, ENSMUSG00000020653, ENSMUSG00000027582, ENSMUSG00000042500,…	1.85939	0.54026	2.2674
GOTERM_BP_5	GO:0007243~protein kinase cascade	25	0.000533853	ENSMUSG00000024242, ENSMUSG00000037112, ENSMUSG00000029458, ENSMUSG00000053137, ENSMUSG00000028864, ENSMUSG00000021457, ENSMUSG00000041241, ENSMUSG00000042429, ENSMUSG00000015312, ENSMUSG00000021180, ENSMUSG00000053693, ENSMUSG00000031137, ENSMUSG00000049556, ENSMUSG00000060477, ENSMUSG00000039285, ENSMUSG00000017376, ENSMUSG00000024789, ENSMUSG00000027560, ENSMUSG00000033629, ENSMUSG00000032380,…	2.16667	0.872118	2.05942
GOTERM_BP_5	GO:0031327~negative regulation of cellular biosynthetic process	38	0.000571993	ENSMUSG00000040363, ENSMUSG00000018476, ENSMUSG00000036052, ENSMUSG00000035877, ENSMUSG00000037235, ENSMUSG00000074637, ENSMUSG00000028842, ENSMUSG00000038418, ENSMUSG00000025402, ENSMUSG00000003382, ENSMUSG00000052707, ENSMUSG00000000567, ENSMUSG00000032402, ENSMUSG00000031609, ENSMUSG00000002307, ENSMUSG00000039410, ENSMUSG00000021318, ENSMUSG00000020653, ENSMUSG00000027582, ENSMUSG00000042500,…	1.8075	0.934151	2.02958
GOTERM_BP_5	GO:0009890~negative regulation of biosynthetic process	38	0.000672975	ENSMUSG00000040363, ENSMUSG00000018476, ENSMUSG00000036052, ENSMUSG00000035877, ENSMUSG00000037235, ENSMUSG00000074637, ENSMUSG00000028842, ENSMUSG00000038418, ENSMUSG00000025402, ENSMUSG00000003382, ENSMUSG00000052707, ENSMUSG00000000567, ENSMUSG00000032402, ENSMUSG00000031609, ENSMUSG00000002307, ENSMUSG00000039410, ENSMUSG00000021318, ENSMUSG00000020653, ENSMUSG00000027582, ENSMUSG00000042500,…	1.79084	1.09822	1.95931
GOTERM_BP_5	GO:0010629~negative regulation of gene expression	36	0.000913573	ENSMUSG00000040363, ENSMUSG00000018476, ENSMUSG00000036052, ENSMUSG00000035877, ENSMUSG00000037235, ENSMUSG00000074637, ENSMUSG00000028842, ENSMUSG00000038418, ENSMUSG00000025402, ENSMUSG00000003382, ENSMUSG00000052707, ENSMUSG00000000567, ENSMUSG00000032402, ENSMUSG00000031609, ENSMUSG00000002307, ENSMUSG00000039410, ENSMUSG00000021318, ENSMUSG00000020653, ENSMUSG00000027582, ENSMUSG00000042500,…	1.7959	1.48809	1.82737
GOTERM_BP_5	GO:0006457~protein folding	16	0.00131143	ENSMUSG00000032171, ENSMUSG00000021037, ENSMUSG00000003226, ENSMUSG00000026740, ENSMUSG00000028035, ENSMUSG00000030357, ENSMUSG00000057069, ENSMUSG00000036052, ENSMUSG00000028960, ENSMUSG00000007944, ENSMUSG00000015656, ENSMUSG00000003814, ENSMUSG00000024222, ENSMUSG00000029657, ENSMUSG00000005483, ENSMUSG00000004460	2.5768	2.12962	1.6717
GOTERM_BP_5	GO:0016481~negative regulation of transcription	33	0.00131883	ENSMUSG00000040363, ENSMUSG00000018476, ENSMUSG00000036052, ENSMUSG00000035877, ENSMUSG00000037235, ENSMUSG00000074637, ENSMUSG00000038418, ENSMUSG00000025402, ENSMUSG00000003382, ENSMUSG00000000567, ENSMUSG00000032402, ENSMUSG00000031609, ENSMUSG00000002307, ENSMUSG00000039410, ENSMUSG00000021318, ENSMUSG00000020653, ENSMUSG00000027582, ENSMUSG00000048001, ENSMUSG00000027660, ENSMUSG00000030103,…	1.81441	2.14152	1.66928
GOTERM_BP_5	GO:0045934~negative regulation of nucleobase, nucleoside, nucleotide and nucleic acid metabolic process	34	0.00194808	ENSMUSG00000040363, ENSMUSG00000018476, ENSMUSG00000036052, ENSMUSG00000035877, ENSMUSG00000037235, ENSMUSG00000074637, ENSMUSG00000038418, ENSMUSG00000025402, ENSMUSG00000003382, ENSMUSG00000000567, ENSMUSG00000032402, ENSMUSG00000031609, ENSMUSG00000002307, ENSMUSG00000039410, ENSMUSG00000021318, ENSMUSG00000020653, ENSMUSG00000027582, ENSMUSG00000048001, ENSMUSG00000027660, ENSMUSG00000030103,…	1.75167	3.14805	1.50196
GOTERM_BP_5	GO:0051252~regulation of RNA metabolic process	97	0.00226958	ENSMUSG00000006215, ENSMUSG00000045817, ENSMUSG00000018476, ENSMUSG00000050855, ENSMUSG00000028341, ENSMUSG00000029135, ENSMUSG00000038418, ENSMUSG00000028389, ENSMUSG00000020538, ENSMUSG00000031925, ENSMUSG00000037868, ENSMUSG00000025408, ENSMUSG00000032402, ENSMUSG00000031609, ENSMUSG00000002307, ENSMUSG00000059475, ENSMUSG00000044167, ENSMUSG00000041324, ENSMUSG00000042406, ENSMUSG00000056854,…	1.33332	3.65855	1.43669
GOTERM_BP_5	GO:0051172~negative regulation of nitrogen compound metabolic process	34	0.00229679	ENSMUSG00000040363, ENSMUSG00000018476, ENSMUSG00000036052, ENSMUSG00000035877, ENSMUSG00000037235, ENSMUSG00000074637, ENSMUSG00000038418, ENSMUSG00000025402, ENSMUSG00000003382, ENSMUSG00000000567, ENSMUSG00000032402, ENSMUSG00000031609, ENSMUSG00000002307, ENSMUSG00000039410, ENSMUSG00000021318, ENSMUSG00000020653, ENSMUSG00000027582, ENSMUSG00000048001, ENSMUSG00000027660, ENSMUSG00000030103,…	1.7342	3.70164	1.43161
GOTERM_BP_5	GO:0045892~negative regulation of transcription, DNA-dependent	28	0.00235291	ENSMUSG00000040363, ENSMUSG00000018476, ENSMUSG00000036052, ENSMUSG00000035877, ENSMUSG00000074637, ENSMUSG00000038418, ENSMUSG00000003382, ENSMUSG00000000567, ENSMUSG00000032402, ENSMUSG00000031609, ENSMUSG00000002307, ENSMUSG00000039410, ENSMUSG00000027582, ENSMUSG00000020653, ENSMUSG00000048001, ENSMUSG00000027660, ENSMUSG00000030103, ENSMUSG00000034271, ENSMUSG00000022091, ENSMUSG00000066687,…	1.85939	3.79045	1.42131
GOTERM_BP_5	GO:0051253~negative regulation of RNA metabolic process	28	0.00256666	ENSMUSG00000040363, ENSMUSG00000018476, ENSMUSG00000036052, ENSMUSG00000035877, ENSMUSG00000074637, ENSMUSG00000038418, ENSMUSG00000003382, ENSMUSG00000000567, ENSMUSG00000032402, ENSMUSG00000031609, ENSMUSG00000002307, ENSMUSG00000039410, ENSMUSG00000027582, ENSMUSG00000020653, ENSMUSG00000048001, ENSMUSG00000027660, ENSMUSG00000030103, ENSMUSG00000034271, ENSMUSG00000022091, ENSMUSG00000066687,…	1.8474	4.12803	1.38426
GOTERM_BP_5	GO:0060736~prostate gland growth	5	0.00282208	ENSMUSG00000000567, ENSMUSG00000020053, ENSMUSG00000005268, ENSMUSG00000030849, ENSMUSG00000019768	7.86667	4.52996	1.34391
GOTERM_BP_5	GO:0010628~positive regulation of gene expression	39	0.00295165	ENSMUSG00000002028, ENSMUSG00000006215, ENSMUSG00000020053, ENSMUSG00000028341, ENSMUSG00000074637, ENSMUSG00000038418, ENSMUSG00000020538, ENSMUSG00000008384, ENSMUSG00000037868, ENSMUSG00000031925, ENSMUSG00000000567, ENSMUSG00000032402, ENSMUSG00000025408, ENSMUSG00000022389, ENSMUSG00000044167, ENSMUSG00000039410, ENSMUSG00000056501, ENSMUSG00000041324, ENSMUSG00000021318, ENSMUSG00000042406,…	1.63459	4.73324	1.32484
GOTERM_BP_5	GO:0045941~positive regulation of transcription	38	0.00330422	ENSMUSG00000002028, ENSMUSG00000006215, ENSMUSG00000020053, ENSMUSG00000028341, ENSMUSG00000074637, ENSMUSG00000038418, ENSMUSG00000020538, ENSMUSG00000008384, ENSMUSG00000037868, ENSMUSG00000031925, ENSMUSG00000000567, ENSMUSG00000032402, ENSMUSG00000025408, ENSMUSG00000022389, ENSMUSG00000044167, ENSMUSG00000039410, ENSMUSG00000056501, ENSMUSG00000041324, ENSMUSG00000021318, ENSMUSG00000042406,…	1.63627	5.28432	1.27701
GOTERM_BP_5	GO:0045596~negative regulation of cell differentiation	19	0.00344288	ENSMUSG00000026923, ENSMUSG00000031760, ENSMUSG00000021025, ENSMUSG00000037573, ENSMUSG00000048482, ENSMUSG00000048001, ENSMUSG00000027660, ENSMUSG00000022951, ENSMUSG00000074637, ENSMUSG00000032558, ENSMUSG00000066687, ENSMUSG00000026313, ENSMUSG00000000567, ENSMUSG00000032402, ENSMUSG00000021765, ENSMUSG00000039410, ENSMUSG00000039239, ENSMUSG00000021318, ENSMUSG00000049556	2.13524	5.50025	1.25962
GOTERM_BP_5	GO:0016311~dephosphorylation	16	0.0036787	ENSMUSG00000034613, ENSMUSG00000037926, ENSMUSG00000027540, ENSMUSG00000015214, ENSMUSG00000018648, ENSMUSG00000020154, ENSMUSG00000039661, ENSMUSG00000068748, ENSMUSG00000031530, ENSMUSG00000053716, ENSMUSG00000024539, ENSMUSG00000018401, ENSMUSG00000019907, ENSMUSG00000019960, ENSMUSG00000049225, ENSMUSG00000023805	2.32095	5.8664	1.23163
GOTERM_BP_5	GO:0007264~small GTPase mediated signal transduction	24	0.00388738	ENSMUSG00000031442, ENSMUSG00000021062, ENSMUSG00000035711, ENSMUSG00000029458, ENSMUSG00000033629, ENSMUSG00000054855, ENSMUSG00000003037, ENSMUSG00000017144, ENSMUSG00000024096, ENSMUSG00000020440, ENSMUSG00000030704, ENSMUSG00000028214, ENSMUSG00000004451, ENSMUSG00000055013, ENSMUSG00000034936, ENSMUSG00000032356, ENSMUSG00000017418, ENSMUSG00000059013, ENSMUSG00000025170, ENSMUSG00000022075,…	1.90264	6.1893	1.20836
GOTERM_BP_5	GO:0010557~positive regulation of macromolecule biosynthetic process	41	0.00403778	ENSMUSG00000002028, ENSMUSG00000006215, ENSMUSG00000020053, ENSMUSG00000028341, ENSMUSG00000074637, ENSMUSG00000038418, ENSMUSG00000021457, ENSMUSG00000020538, ENSMUSG00000008384, ENSMUSG00000037868, ENSMUSG00000031925, ENSMUSG00000000567, ENSMUSG00000032402, ENSMUSG00000025408, ENSMUSG00000022389, ENSMUSG00000035873, ENSMUSG00000044167, ENSMUSG00000039410, ENSMUSG00000056501, ENSMUSG00000041324,…	1.58224	6.42136	1.19237
GOTERM_BP_5	GO:0006355~regulation of transcription, DNA-dependent	94	0.00422677	ENSMUSG00000006215, ENSMUSG00000018476, ENSMUSG00000050855, ENSMUSG00000028341, ENSMUSG00000029135, ENSMUSG00000038418, ENSMUSG00000028389, ENSMUSG00000020538, ENSMUSG00000031925, ENSMUSG00000037868, ENSMUSG00000025408, ENSMUSG00000032402, ENSMUSG00000031609, ENSMUSG00000002307, ENSMUSG00000059475, ENSMUSG00000044167, ENSMUSG00000041324, ENSMUSG00000042406, ENSMUSG00000056854, ENSMUSG00000027582,…	1.31236	6.71221	1.17313
GOTERM_BP_5	GO:0031328~positive regulation of cellular biosynthetic process	42	0.0047428	ENSMUSG00000002028, ENSMUSG00000006215, ENSMUSG00000020053, ENSMUSG00000028341, ENSMUSG00000074637, ENSMUSG00000038418, ENSMUSG00000021457, ENSMUSG00000020538, ENSMUSG00000008384, ENSMUSG00000037868, ENSMUSG00000031925, ENSMUSG00000000567, ENSMUSG00000032402, ENSMUSG00000025408, ENSMUSG00000022389, ENSMUSG00000035873, ENSMUSG00000044167, ENSMUSG00000039410, ENSMUSG00000056501, ENSMUSG00000041324,…	1.55623	7.50207	1.12482
GOTERM_BP_5	GO:0031324~negative regulation of cellular metabolic process	38	0.00531966	ENSMUSG00000040363, ENSMUSG00000018476, ENSMUSG00000036052, ENSMUSG00000035877, ENSMUSG00000037235, ENSMUSG00000074637, ENSMUSG00000028842, ENSMUSG00000038418, ENSMUSG00000025402, ENSMUSG00000003382, ENSMUSG00000052707, ENSMUSG00000000567, ENSMUSG00000032402, ENSMUSG00000031609, ENSMUSG00000002307, ENSMUSG00000039410, ENSMUSG00000021318, ENSMUSG00000020653, ENSMUSG00000027582, ENSMUSG00000042500,…	1.58942	8.3776	1.07688
GOTERM_BP_5	GO:0009891~positive regulation of biosynthetic process	42	0.00553723	ENSMUSG00000002028, ENSMUSG00000006215, ENSMUSG00000020053, ENSMUSG00000028341, ENSMUSG00000074637, ENSMUSG00000038418, ENSMUSG00000021457, ENSMUSG00000020538, ENSMUSG00000008384, ENSMUSG00000037868, ENSMUSG00000031925, ENSMUSG00000000567, ENSMUSG00000032402, ENSMUSG00000025408, ENSMUSG00000022389, ENSMUSG00000035873, ENSMUSG00000044167, ENSMUSG00000039410, ENSMUSG00000056501, ENSMUSG00000041324,…	1.54226	8.70579	1.06019
GOTERM_BP_5	GO:0016477~cell migration	22	0.00696488	ENSMUSG00000033933, ENSMUSG00000066877, ENSMUSG00000031217, ENSMUSG00000000957, ENSMUSG00000032532, ENSMUSG00000019843, ENSMUSG00000000489, ENSMUSG00000015605, ENSMUSG00000030707, ENSMUSG00000027646, ENSMUSG00000043858, ENSMUSG00000022672, ENSMUSG00000027797, ENSMUSG00000048163, ENSMUSG00000023905, ENSMUSG00000024486, ENSMUSG00000037279, ENSMUSG00000062960, ENSMUSG00000055805, ENSMUSG00000039239,…	1.87489	10.8321
GOTERM_BP_5	GO:0030879~mammary gland development	11	0.00892658	ENSMUSG00000021253, ENSMUSG00000041147, ENSMUSG00000027678, ENSMUSG00000038894, ENSMUSG00000020053, ENSMUSG00000005268, ENSMUSG00000030849, ENSMUSG00000019768, ENSMUSG00000056501, ENSMUSG00000027646, ENSMUSG00000021318	2.61612	13.678
GOTERM_BP_5	GO:0010605~negative regulation of macromolecule metabolic process	38	0.00905743	ENSMUSG00000040363, ENSMUSG00000018476, ENSMUSG00000036052, ENSMUSG00000035877, ENSMUSG00000037235, ENSMUSG00000074637, ENSMUSG00000028842, ENSMUSG00000038418, ENSMUSG00000025402, ENSMUSG00000003382, ENSMUSG00000052707, ENSMUSG00000000567, ENSMUSG00000032402, ENSMUSG00000031609, ENSMUSG00000002307, ENSMUSG00000039410, ENSMUSG00000021318, ENSMUSG00000020653, ENSMUSG00000027582, ENSMUSG00000042500,…	1.53602	13.8647
GOTERM_BP_5	GO:0009966~regulation of signal transduction	47	0.00911544	ENSMUSG00000031442, ENSMUSG00000040940, ENSMUSG00000037112, ENSMUSG00000034997, ENSMUSG00000020053, ENSMUSG00000028864, ENSMUSG00000038485, ENSMUSG00000074637, ENSMUSG00000028517, ENSMUSG00000021457, ENSMUSG00000000489, ENSMUSG00000026864, ENSMUSG00000041241, ENSMUSG00000026360, ENSMUSG00000032402, ENSMUSG00000036169, ENSMUSG00000035873, ENSMUSG00000027581, ENSMUSG00000004056, ENSMUSG00000039410,…	1.45432	13.9474
GOTERM_BP_5	GO:0010648~negative regulation of cell communication	18	0.00954604	ENSMUSG00000017376, ENSMUSG00000021025, ENSMUSG00000037573, ENSMUSG00000034997, ENSMUSG00000020053, ENSMUSG00000027660, ENSMUSG00000038485, ENSMUSG00000074637, ENSMUSG00000043858, ENSMUSG00000026864, ENSMUSG00000021253, ENSMUSG00000026360, ENSMUSG00000042429, ENSMUSG00000036169, ENSMUSG00000035873, ENSMUSG00000027581, ENSMUSG00000039410, ENSMUSG00000027582	1.97935	14.5588
GOTERM_BP_5	GO:0051173~positive regulation of nitrogen compound metabolic process	39	0.00996791	ENSMUSG00000002028, ENSMUSG00000006215, ENSMUSG00000020053, ENSMUSG00000028341, ENSMUSG00000074637, ENSMUSG00000038418, ENSMUSG00000020538, ENSMUSG00000008384, ENSMUSG00000037868, ENSMUSG00000031925, ENSMUSG00000000567, ENSMUSG00000032402, ENSMUSG00000025408, ENSMUSG00000022389, ENSMUSG00000044167, ENSMUSG00000039410, ENSMUSG00000056501, ENSMUSG00000041324, ENSMUSG00000021318, ENSMUSG00000042406,…	1.5165	15.1538
GOTERM_BP_5	GO:0045935~positive regulation of nucleobase, nucleoside, nucleotide and nucleic acid metabolic process	38	0.0101877	ENSMUSG00000002028, ENSMUSG00000006215, ENSMUSG00000020053, ENSMUSG00000028341, ENSMUSG00000074637, ENSMUSG00000038418, ENSMUSG00000020538, ENSMUSG00000008384, ENSMUSG00000037868, ENSMUSG00000031925, ENSMUSG00000000567, ENSMUSG00000032402, ENSMUSG00000025408, ENSMUSG00000022389, ENSMUSG00000044167, ENSMUSG00000039410, ENSMUSG00000056501, ENSMUSG00000041324, ENSMUSG00000021318, ENSMUSG00000042406,…	1.52397	15.4622
GOTERM_BP_5	GO:0006916~anti-apoptosis	11	0.0104376	ENSMUSG00000024026, ENSMUSG00000048482, ENSMUSG00000031781, ENSMUSG00000020053, ENSMUSG00000007659, ENSMUSG00000028864, ENSMUSG00000044167, ENSMUSG00000019768, ENSMUSG00000027193, ENSMUSG00000056501, ENSMUSG00000031431	2.55667	15.8117
GOTERM_BP_5	GO:0008286~insulin receptor signaling pathway	6	0.0105259	ENSMUSG00000037112, ENSMUSG00000027540, ENSMUSG00000038894, ENSMUSG00000024539, ENSMUSG00000044167, ENSMUSG00000038485	4.38286	15.9348
GOTERM_BP_5	GO:0030850~prostate gland development	7	0.010883	ENSMUSG00000026923, ENSMUSG00000000567, ENSMUSG00000030357, ENSMUSG00000020053, ENSMUSG00000005268, ENSMUSG00000030849, ENSMUSG00000019768	3.67111	16.4311
GOTERM_BP_5	GO:0010604~positive regulation of macromolecule metabolic process	45	0.0112758	ENSMUSG00000002028, ENSMUSG00000006215, ENSMUSG00000020053, ENSMUSG00000028341, ENSMUSG00000074637, ENSMUSG00000038418, ENSMUSG00000021457, ENSMUSG00000020538, ENSMUSG00000008384, ENSMUSG00000042429, ENSMUSG00000037868, ENSMUSG00000031925, ENSMUSG00000000567, ENSMUSG00000058709, ENSMUSG00000032402, ENSMUSG00000025408, ENSMUSG00000022389, ENSMUSG00000035873, ENSMUSG00000044167, ENSMUSG00000039410,…	1.45403	16.9738
GOTERM_BP_5	GO:0008284~positive regulation of cell proliferation	24	0.0118667	ENSMUSG00000026923, ENSMUSG00000059588, ENSMUSG00000010175, ENSMUSG00000034997, ENSMUSG00000020053, ENSMUSG00000031217, ENSMUSG00000029135, ENSMUSG00000030849, ENSMUSG00000019768, ENSMUSG00000074637, ENSMUSG00000021457, ENSMUSG00000000489, ENSMUSG00000030707, ENSMUSG00000039662, ENSMUSG00000024486, ENSMUSG00000038894, ENSMUSG00000074129, ENSMUSG00000062960, ENSMUSG00000007659, ENSMUSG00000025856,…	1.72845	17.784
GOTERM_BP_5	GO:0060737~prostate gland morphogenetic growth	3	0.013363	ENSMUSG00000000567, ENSMUSG00000030849, ENSMUSG00000019768	15.34	19.8025
GOTERM_BP_5	GO:0060429~epithelium development	23	0.0134315	ENSMUSG00000026923, ENSMUSG00000010175, ENSMUSG00000039473, ENSMUSG00000041703, ENSMUSG00000027678, ENSMUSG00000020053, ENSMUSG00000020484, ENSMUSG00000030849, ENSMUSG00000019768, ENSMUSG00000027646, ENSMUSG00000027684, ENSMUSG00000037016, ENSMUSG00000016028, ENSMUSG00000000567, ENSMUSG00000032402, ENSMUSG00000037279, ENSMUSG00000062960, ENSMUSG00000005268, ENSMUSG00000007989, ENSMUSG00000026556,…	1.73589	19.8938
GOTERM_BP_5	GO:0048732~gland development	18	0.0162102	ENSMUSG00000026923, ENSMUSG00000027678, ENSMUSG00000030357, ENSMUSG00000020053, ENSMUSG00000020484, ENSMUSG00000030849, ENSMUSG00000019768, ENSMUSG00000074637, ENSMUSG00000027646, ENSMUSG00000000489, ENSMUSG00000021253, ENSMUSG00000000567, ENSMUSG00000032402, ENSMUSG00000041147, ENSMUSG00000038894, ENSMUSG00000005268, ENSMUSG00000056501, ENSMUSG00000021318	1.86883	23.5157
GOTERM_BP_5	GO:0032869~cellular response to insulin stimulus	7	0.017268	ENSMUSG00000037112, ENSMUSG00000027540, ENSMUSG00000038894, ENSMUSG00000024539, ENSMUSG00000044167, ENSMUSG00000004056, ENSMUSG00000038485	3.32961	24.8535
PANTHER_BP_ALL	BP00063:Protein modification	91	1.10551e-07	ENSMUSG00000020032, ENSMUSG00000038967, ENSMUSG00000053137, ENSMUSG00000021360, ENSMUSG00000025823, ENSMUSG00000021457, ENSMUSG00000050697, ENSMUSG00000037470, ENSMUSG00000036620, ENSMUSG00000030584, ENSMUSG00000031608, ENSMUSG00000020571, ENSMUSG00000030062, ENSMUSG00000027298, ENSMUSG00000073792, ENSMUSG00000038145, ENSMUSG00000053693, ENSMUSG00000060477, ENSMUSG00000034040, ENSMUSG00000034613,…	1.76065	0.000136793	5.86394
PANTHER_BP_ALL	BP00064:Protein phosphorylation	59	8.39689e-07	ENSMUSG00000020032, ENSMUSG00000038967, ENSMUSG00000053137, ENSMUSG00000021457, ENSMUSG00000050697, ENSMUSG00000027298, ENSMUSG00000038145, ENSMUSG00000053693, ENSMUSG00000060477, ENSMUSG00000034613, ENSMUSG00000027540, ENSMUSG00000024789, ENSMUSG00000028876, ENSMUSG00000053646, ENSMUSG00000030849, ENSMUSG00000027646, ENSMUSG00000022672, ENSMUSG00000068748, ENSMUSG00000041769, ENSMUSG00000051590,…	1.97551	0.00103901	4.98338
PANTHER_BP_ALL	BP00062:Protein folding	23	8.74151e-07	ENSMUSG00000021037, ENSMUSG00000028035, ENSMUSG00000030357, ENSMUSG00000005936, ENSMUSG00000036052, ENSMUSG00000015656, ENSMUSG00000007944, ENSMUSG00000063802, ENSMUSG00000003814, ENSMUSG00000005483, ENSMUSG00000004460, ENSMUSG00000026864, ENSMUSG00000032171, ENSMUSG00000038187, ENSMUSG00000022403, ENSMUSG00000026740, ENSMUSG00000024780, ENSMUSG00000057069, ENSMUSG00000026203, ENSMUSG00000027305,…	3.41868	0.00108165	4.96591
PANTHER_BP_ALL	BP00224:Cell proliferation and differentiation	64	0.000213727	ENSMUSG00000071341, ENSMUSG00000037235, ENSMUSG00000025402, ENSMUSG00000028389, ENSMUSG00000021457, ENSMUSG00000019370, ENSMUSG00000000489, ENSMUSG00000039637, ENSMUSG00000029544, ENSMUSG00000015312, ENSMUSG00000030584, ENSMUSG00000047904, ENSMUSG00000027298, ENSMUSG00000025856, ENSMUSG00000044167, ENSMUSG00000039239, ENSMUSG00000023067, ENSMUSG00000041324, ENSMUSG00000010175, ENSMUSG00000026923,…	1.59807	0.264141	2.57816
PANTHER_BP_ALL	BP00114:MAPKKK cascade	20	0.000579736	ENSMUSG00000034613, ENSMUSG00000017376, ENSMUSG00000037573, ENSMUSG00000021224, ENSMUSG00000053137, ENSMUSG00000022150, ENSMUSG00000018648, ENSMUSG00000020423, ENSMUSG00000031853, ENSMUSG00000031530, ENSMUSG00000020601, ENSMUSG00000015312, ENSMUSG00000054667, ENSMUSG00000038894, ENSMUSG00000053716, ENSMUSG00000030199, ENSMUSG00000021180, ENSMUSG00000016528, ENSMUSG00000024558, ENSMUSG00000019960	2.43077	0.714995	2.1457
PANTHER_BP_ALL	BP00111:Intracellular signaling cascade	59	0.000760787	ENSMUSG00000031442, ENSMUSG00000045817, ENSMUSG00000030357, ENSMUSG00000053137, ENSMUSG00000022951, ENSMUSG00000035954, ENSMUSG00000021457, ENSMUSG00000019370, ENSMUSG00000000489, ENSMUSG00000029544, ENSMUSG00000015312, ENSMUSG00000054667, ENSMUSG00000032402, ENSMUSG00000038291, ENSMUSG00000027581, ENSMUSG00000025856, ENSMUSG00000024222, ENSMUSG00000034613, ENSMUSG00000021025, ENSMUSG00000037573,…	1.55625	0.937323	2.02811
PANTHER_BP_ALL	BP00178:Stress response	20	0.00160425	ENSMUSG00000021037, ENSMUSG00000021025, ENSMUSG00000024966, ENSMUSG00000015656, ENSMUSG00000028341, ENSMUSG00000053004, ENSMUSG00000031853, ENSMUSG00000026864, ENSMUSG00000050697, ENSMUSG00000041769, ENSMUSG00000015312, ENSMUSG00000038205, ENSMUSG00000024620, ENSMUSG00000030043, ENSMUSG00000016528, ENSMUSG00000031068, ENSMUSG00000056501, ENSMUSG00000004951, ENSMUSG00000059991, ENSMUSG00000032115	2.23335	1.96707	1.70618
PANTHER_BP_ALL	BP00108:Receptor protein tyrosine kinase signaling pathway	20	0.00191095	ENSMUSG00000027540, ENSMUSG00000048482, ENSMUSG00000024789, ENSMUSG00000066877, ENSMUSG00000027560, ENSMUSG00000028876, ENSMUSG00000031217, ENSMUSG00000053646, ENSMUSG00000030849, ENSMUSG00000000489, ENSMUSG00000054667, ENSMUSG00000074129, ENSMUSG00000024620, ENSMUSG00000032356, ENSMUSG00000062960, ENSMUSG00000014361, ENSMUSG00000024539, ENSMUSG00000027298, ENSMUSG00000025856, ENSMUSG00000031137	2.19985	2.33904	1.63096
PANTHER_BP_ALL	BP00060:Protein metabolism and modification	164	0.00197897	ENSMUSG00000043943, ENSMUSG00000053137, ENSMUSG00000000740, ENSMUSG00000015656, ENSMUSG00000025823, ENSMUSG00000021457, ENSMUSG00000028842, ENSMUSG00000042599, ENSMUSG00000038187, ENSMUSG00000037470, ENSMUSG00000036620, ENSMUSG00000043635, ENSMUSG00000020571, ENSMUSG00000030062, ENSMUSG00000053693, ENSMUSG00000025964, ENSMUSG00000035202, ENSMUSG00000025290, ENSMUSG00000034040, ENSMUSG00000034613,…	1.23258	2.42137	1.61594
PANTHER_BP_ALL	BP00287:Cell motility	27	0.00255701	ENSMUSG00000031442, ENSMUSG00000055044, ENSMUSG00000066877, ENSMUSG00000039552, ENSMUSG00000035954, ENSMUSG00000000489, ENSMUSG00000039637, ENSMUSG00000004451, ENSMUSG00000056752, ENSMUSG00000043079, ENSMUSG00000026202, ENSMUSG00000027298, ENSMUSG00000025856, ENSMUSG00000025321, ENSMUSG00000036106, ENSMUSG00000026923, ENSMUSG00000001525, ENSMUSG00000035711, ENSMUSG00000024789, ENSMUSG00000019768,…	1.87962	3.1184	1.50607
PANTHER_BP_ALL	BP00281:Oncogenesis	32	0.00473381	ENSMUSG00000031442, ENSMUSG00000033933, ENSMUSG00000035242, ENSMUSG00000028864, ENSMUSG00000030811, ENSMUSG00000026796, ENSMUSG00000032402, ENSMUSG00000040652, ENSMUSG00000026109, ENSMUSG00000027298, ENSMUSG00000023067, ENSMUSG00000010175, ENSMUSG00000022895, ENSMUSG00000030226, ENSMUSG00000027660, ENSMUSG00000065954, ENSMUSG00000019843, ENSMUSG00000030849, ENSMUSG00000013089, ENSMUSG00000059854,…	1.69219	5.7024	1.24394
PANTHER_BP_ALL	BP00044:mRNA transcription regulation	83	0.00606089	ENSMUSG00000071341, ENSMUSG00000033730, ENSMUSG00000018476, ENSMUSG00000028341, ENSMUSG00000029135, ENSMUSG00000039987, ENSMUSG00000037235, ENSMUSG00000038418, ENSMUSG00000025402, ENSMUSG00000028389, ENSMUSG00000039671, ENSMUSG00000022708, ENSMUSG00000037868, ENSMUSG00000024528, ENSMUSG00000032402, ENSMUSG00000030584, ENSMUSG00000031609, ENSMUSG00000059475, ENSMUSG00000044167, ENSMUSG00000042406,…	1.32598	7.24649	1.13987
PANTHER_BP_ALL	BP00125:Intracellular protein traffic	58	0.0062401	ENSMUSG00000028385, ENSMUSG00000053841, ENSMUSG00000063146, ENSMUSG00000003037, ENSMUSG00000035954, ENSMUSG00000039637, ENSMUSG00000056429, ENSMUSG00000034936, ENSMUSG00000017418, ENSMUSG00000030082, ENSMUSG00000038291, ENSMUSG00000031788, ENSMUSG00000005069, ENSMUSG00000001525, ENSMUSG00000021062, ENSMUSG00000021025, ENSMUSG00000015214, ENSMUSG00000032220, ENSMUSG00000001855, ENSMUSG00000030707,…	1.41768	7.45321	1.12766
PANTHER_BP_ALL	BP00203:Cell cycle	56	0.00857685	ENSMUSG00000032489, ENSMUSG00000063146, ENSMUSG00000025147, ENSMUSG00000030357, ENSMUSG00000019370, ENSMUSG00000039637, ENSMUSG00000029544, ENSMUSG00000015312, ENSMUSG00000030584, ENSMUSG00000027298, ENSMUSG00000025856, ENSMUSG00000044167, ENSMUSG00000023067, ENSMUSG00000024222, ENSMUSG00000001525, ENSMUSG00000037573, ENSMUSG00000024789, ENSMUSG00000070713, ENSMUSG00000019768, ENSMUSG00000030707,…	1.40469	10.1102
PANTHER_BP_ALL	BP00269:Glucose homeostasis	5	0.00945102	ENSMUSG00000027540, ENSMUSG00000054667, ENSMUSG00000038894, ENSMUSG00000024539, ENSMUSG00000038485	5.78907	11.0861
PANTHER_BP_ALL	BP00285:Cell structure and motility	63	0.00987332	ENSMUSG00000031442, ENSMUSG00000055044, ENSMUSG00000063146, ENSMUSG00000035954, ENSMUSG00000017144, ENSMUSG00000000489, ENSMUSG00000056752, ENSMUSG00000039179, ENSMUSG00000004451, ENSMUSG00000039637, ENSMUSG00000027298, ENSMUSG00000025856, ENSMUSG00000044167, ENSMUSG00000031788, ENSMUSG00000036106, ENSMUSG00000026923, ENSMUSG00000001525, ENSMUSG00000035711, ENSMUSG00000024789, ENSMUSG00000028063,…	1.36542	11.554
PANTHER_BP_ALL	BP00207:Cell cycle control	29	0.0113975	ENSMUSG00000037112, ENSMUSG00000052135, ENSMUSG00000030357, ENSMUSG00000029635, ENSMUSG00000015312, ENSMUSG00000030584, ENSMUSG00000027298, ENSMUSG00000044167, ENSMUSG00000004056, ENSMUSG00000025856, ENSMUSG00000023067, ENSMUSG00000024222, ENSMUSG00000003545, ENSMUSG00000037573, ENSMUSG00000024789, ENSMUSG00000027660, ENSMUSG00000019843, ENSMUSG00000019768, ENSMUSG00000028086, ENSMUSG00000027646,…	1.63578	13.224
PANTHER_BP_ALL	BP00193:Developmental processes	117	0.0134929	ENSMUSG00000010453, ENSMUSG00000022951, ENSMUSG00000047428, ENSMUSG00000025402, ENSMUSG00000045045, ENSMUSG00000028389, ENSMUSG00000021457, ENSMUSG00000037868, ENSMUSG00000059475, ENSMUSG00000027581, ENSMUSG00000039239, ENSMUSG00000021318, ENSMUSG00000033594, ENSMUSG00000024789, ENSMUSG00000030849, ENSMUSG00000019768, ENSMUSG00000013089, ENSMUSG00000027646, ENSMUSG00000039167, ENSMUSG00000032265,…	1.22214	15.4727
PANTHER_BP_ALL	BP00276:General vesicle transport	20	0.0139292	ENSMUSG00000021062, ENSMUSG00000047694, ENSMUSG00000053841, ENSMUSG00000063146, ENSMUSG00000015214, ENSMUSG00000032220, ENSMUSG00000003037, ENSMUSG00000020440, ENSMUSG00000020088, ENSMUSG00000030704, ENSMUSG00000024072, ENSMUSG00000034936, ENSMUSG00000032558, ENSMUSG00000017418, ENSMUSG00000057069, ENSMUSG00000025170, ENSMUSG00000022765, ENSMUSG00000018401, ENSMUSG00000062421, ENSMUSG00000035226	1.8256	15.9341
KEGG_PATHWAY	mmu04010:MAPK signaling pathway	32	2.45276e-06	ENSMUSG00000024242, ENSMUSG00000048482, ENSMUSG00000053137, ENSMUSG00000015656, ENSMUSG00000028862, ENSMUSG00000000489, ENSMUSG00000015312, ENSMUSG00000025408, ENSMUSG00000002307, ENSMUSG00000021180, ENSMUSG00000025856, ENSMUSG00000004056, ENSMUSG00000039239, ENSMUSG00000031137, ENSMUSG00000042406, ENSMUSG00000017376, ENSMUSG00000053395, ENSMUSG00000018909, ENSMUSG00000030849, ENSMUSG00000018648,…	2.5196	0.00295846	4.52893
KEGG_PATHWAY	mmu04920:Adipocytokine signaling pathway	12	0.000283908	ENSMUSG00000038205, ENSMUSG00000021025, ENSMUSG00000054667, ENSMUSG00000038894, ENSMUSG00000028645, ENSMUSG00000024789, ENSMUSG00000004056, ENSMUSG00000032883, ENSMUSG00000030168, ENSMUSG00000042010, ENSMUSG00000026457, ENSMUSG00000050697	3.7371	0.341911	2.46609
KEGG_PATHWAY	mmu05200:Pathways in cancer	30	0.000659536	ENSMUSG00000033933, ENSMUSG00000020053, ENSMUSG00000028864, ENSMUSG00000000489, ENSMUSG00000004451, ENSMUSG00000058709, ENSMUSG00000032402, ENSMUSG00000028645, ENSMUSG00000025856, ENSMUSG00000044167, ENSMUSG00000004056, ENSMUSG00000023067, ENSMUSG00000039239, ENSMUSG00000031137, ENSMUSG00000021318, ENSMUSG00000048701, ENSMUSG00000021025, ENSMUSG00000014850, ENSMUSG00000030849, ENSMUSG00000032380,…	1.93797	0.792634	2.10093
KEGG_PATHWAY	mmu05020:Prion diseases	8	0.00111302	ENSMUSG00000026923, ENSMUSG00000036887, ENSMUSG00000024966, ENSMUSG00000019843, ENSMUSG00000036905, ENSMUSG00000038418, ENSMUSG00000026864, ENSMUSG00000036896	4.76925	1.33428	1.87475
KEGG_PATHWAY	mmu05211:Renal cell carcinoma	9	0.0176328	ENSMUSG00000021253, ENSMUSG00000033933, ENSMUSG00000058709, ENSMUSG00000028645, ENSMUSG00000028864, ENSMUSG00000004056, ENSMUSG00000025856, ENSMUSG00000039239, ENSMUSG00000000489	2.6827	19.3122
KEGG_PATHWAY	mmu04722:Neurotrophin signaling pathway	13	0.020825	ENSMUSG00000021025, ENSMUSG00000054667, ENSMUSG00000048482, ENSMUSG00000038894, ENSMUSG00000035529, ENSMUSG00000053137, ENSMUSG00000016528, ENSMUSG00000021180, ENSMUSG00000004056, ENSMUSG00000019370, ENSMUSG00000042406, ENSMUSG00000060477, ENSMUSG00000024617	2.08655	22.4186
KEGG_PATHWAY	mmu04710:Circadian rhythm	4	0.0215668	ENSMUSG00000020893, ENSMUSG00000055866, ENSMUSG00000020038, ENSMUSG00000030103	6.42014	23.1245

## Sheet: CON SI (GSEA)
UP
Function	Normalized enrichment score (NES)	FDR q-value
GO_cc
CONTRACTILE_FIBER	1.82	0.078
CONTRACTILE_FIBER_PART	1.75	0.085
MYOFIBRIL	1.73	0.077
KEGG
KEGG_MAPK_SIGNALING_PATHWAY	1.81	0.095
KEGG_PRION_DISEASES	1.78	0.072
DOWN
Function	Normalized enrichment score (NES)	FDR q-value
KEGG
KEGG_VALINE_LEUCINE_AND_ISOLEUCINE_DEGRADATION	-2.07	0.003
KEGG_PROPANOATE_METABOLISM	-1.94	0.017
KEGG_ABC_TRANSPORTERS	-1.81	0.056

## Sheet: GF SI
Functional annotation and enrichment analysis using DAVID v6.7 (http://david.abcc.ncifcrf.gov/)
shown are only results with a false discovery rate (FDR) <25%; values with FDR<10% were considered significant; enriched terms with 10%>FDR<25% are shown in grey
FDR/100 is called p-adjusted (padj) in manuscript and figures
For the combined lists, only biological processes and pathways are reported
UP
Category	Term	Count	un-adjusted p-value	Genes	Fold Enrichment	FDR [%]	-log10 (FDR/100)
GOTERM_BP_5	GO:0016070~RNA metabolic process	128	8.35071e-21	ENSMUSG00000029817, ENSMUSG00000032580, ENSMUSG00000053286, ENSMUSG00000028842, ENSMUSG00000031585, ENSMUSG00000028907, ENSMUSG00000026127, ENSMUSG00000040824, ENSMUSG00000025408, ENSMUSG00000035575, ENSMUSG00000034931, ENSMUSG00000028902, ENSMUSG00000002455, ENSMUSG00000071757, ENSMUSG00000021595, ENSMUSG00000038611, ENSMUSG00000003848, ENSMUSG00000020409, ENSMUSG00000029169, ENSMUSG00000048100,…	2.36103	1.39526e-17	18.8553
GOTERM_BP_5	GO:0006396~RNA processing	94	1.81461e-18	ENSMUSG00000029817, ENSMUSG00000060152, ENSMUSG00000079470, ENSMUSG00000040383, ENSMUSG00000028609, ENSMUSG00000032580, ENSMUSG00000031403, ENSMUSG00000060373, ENSMUSG00000053286, ENSMUSG00000028676, ENSMUSG00000028907, ENSMUSG00000026127, ENSMUSG00000040720, ENSMUSG00000040824, ENSMUSG00000035575, ENSMUSG00000023932, ENSMUSG00000004865, ENSMUSG00000059208, ENSMUSG00000034931, ENSMUSG00000059005,…	2.62661	3.03191e-15	16.5183
GOTERM_BP_5	GO:0016071~mRNA metabolic process	74	7.18835e-18	ENSMUSG00000029817, ENSMUSG00000028609, ENSMUSG00000040383, ENSMUSG00000032580, ENSMUSG00000060373, ENSMUSG00000022160, ENSMUSG00000028676, ENSMUSG00000028842, ENSMUSG00000040720, ENSMUSG00000040824, ENSMUSG00000023932, ENSMUSG00000004865, ENSMUSG00000034931, ENSMUSG00000059208, ENSMUSG00000059005, ENSMUSG00000016018, ENSMUSG00000002455, ENSMUSG00000028902, ENSMUSG00000060475, ENSMUSG00000033732,…	2.99209	1.20105e-14	15.9204
GOTERM_BP_5	GO:0008380~RNA splicing	58	1.42497e-17	ENSMUSG00000029817, ENSMUSG00000028609, ENSMUSG00000040383, ENSMUSG00000032580, ENSMUSG00000060373, ENSMUSG00000028676, ENSMUSG00000040720, ENSMUSG00000040824, ENSMUSG00000023932, ENSMUSG00000004865, ENSMUSG00000034931, ENSMUSG00000059208, ENSMUSG00000059005, ENSMUSG00000016018, ENSMUSG00000002455, ENSMUSG00000028902, ENSMUSG00000060475, ENSMUSG00000033732, ENSMUSG00000020409, ENSMUSG00000020180,…	3.52356	2.38088e-14	15.6233
GOTERM_BP_5	GO:0044267~cellular protein metabolic process	272	3.599e-17	ENSMUSG00000024360, ENSMUSG00000026254, ENSMUSG00000019774, ENSMUSG00000025103, ENSMUSG00000032501, ENSMUSG00000032905, ENSMUSG00000073563, ENSMUSG00000046378, ENSMUSG00000025613, ENSMUSG00000020124, ENSMUSG00000022263, ENSMUSG00000021116, ENSMUSG00000028309, ENSMUSG00000024789, ENSMUSG00000024359, ENSMUSG00000041180, ENSMUSG00000052833, ENSMUSG00000033364, ENSMUSG00000051590, ENSMUSG00000020601,…	1.5907	6.01331e-14	15.2209
GOTERM_BP_5	GO:0006397~mRNA processing	66	1.20993e-16	ENSMUSG00000029817, ENSMUSG00000028609, ENSMUSG00000040383, ENSMUSG00000032580, ENSMUSG00000060373, ENSMUSG00000028676, ENSMUSG00000040720, ENSMUSG00000040824, ENSMUSG00000023932, ENSMUSG00000004865, ENSMUSG00000034931, ENSMUSG00000059208, ENSMUSG00000059005, ENSMUSG00000016018, ENSMUSG00000002455, ENSMUSG00000028902, ENSMUSG00000060475, ENSMUSG00000033732, ENSMUSG00000038611, ENSMUSG00000020409,…	3.07604	1.88738e-13	14.7241
GOTERM_BP_5	GO:0010468~regulation of gene expression	296	1.90138e-14	ENSMUSG00000026254, ENSMUSG00000063281, ENSMUSG00000063632, ENSMUSG00000018501, ENSMUSG00000038418, ENSMUSG00000021514, ENSMUSG00000061911, ENSMUSG00000021264, ENSMUSG00000029684, ENSMUSG00000021116, ENSMUSG00000046185, ENSMUSG00000025782, ENSMUSG00000072872, ENSMUSG00000022774, ENSMUSG00000013089, ENSMUSG00000033623, ENSMUSG00000009575, ENSMUSG00000027104, ENSMUSG00000026740, ENSMUSG00000037174,…	1.48804	3.17191e-11	12.4987
GOTERM_BP_5	GO:0006457~protein folding	41	2.61002e-14	ENSMUSG00000021037, ENSMUSG00000003226, ENSMUSG00000028035, ENSMUSG00000030357, ENSMUSG00000030007, ENSMUSG00000036052, ENSMUSG00000015656, ENSMUSG00000028343, ENSMUSG00000003814, ENSMUSG00000056629, ENSMUSG00000073676, ENSMUSG00000059659, ENSMUSG00000028410, ENSMUSG00000019802, ENSMUSG00000025613, ENSMUSG00000025757, ENSMUSG00000057069, ENSMUSG00000024222, ENSMUSG00000027804, ENSMUSG00000024847,…	3.94212	4.35874e-11	12.3606
GOTERM_BP_5	GO:0010556~regulation of macromolecule biosynthetic process	286	4.3762e-13	ENSMUSG00000026254, ENSMUSG00000063281, ENSMUSG00000063632, ENSMUSG00000018501, ENSMUSG00000038418, ENSMUSG00000021514, ENSMUSG00000061911, ENSMUSG00000021264, ENSMUSG00000029684, ENSMUSG00000021116, ENSMUSG00000046185, ENSMUSG00000025782, ENSMUSG00000072872, ENSMUSG00000022774, ENSMUSG00000013089, ENSMUSG00000033623, ENSMUSG00000009575, ENSMUSG00000027104, ENSMUSG00000026740, ENSMUSG00000037174,…	1.46675	7.31237e-10	11.1359
GOTERM_BP_5	GO:0031326~regulation of cellular biosynthetic process	293	7.81516e-13	ENSMUSG00000026254, ENSMUSG00000063281, ENSMUSG00000063632, ENSMUSG00000018501, ENSMUSG00000038418, ENSMUSG00000021514, ENSMUSG00000061911, ENSMUSG00000021264, ENSMUSG00000029684, ENSMUSG00000021116, ENSMUSG00000046185, ENSMUSG00000025782, ENSMUSG00000072872, ENSMUSG00000022774, ENSMUSG00000013089, ENSMUSG00000033623, ENSMUSG00000009575, ENSMUSG00000027104, ENSMUSG00000025889, ENSMUSG00000026740,…	1.45027	1.30573e-09	10.8841
GOTERM_BP_5	GO:0045449~regulation of transcription	262	7.02363e-11	ENSMUSG00000063281, ENSMUSG00000063632, ENSMUSG00000018501, ENSMUSG00000038418, ENSMUSG00000021514, ENSMUSG00000061911, ENSMUSG00000021264, ENSMUSG00000029684, ENSMUSG00000046185, ENSMUSG00000025782, ENSMUSG00000072872, ENSMUSG00000013089, ENSMUSG00000033623, ENSMUSG00000009575, ENSMUSG00000027104, ENSMUSG00000037174, ENSMUSG00000020708, ENSMUSG00000015839, ENSMUSG00000031245, ENSMUSG00000078427,…	1.43658	1.17353e-07	8.93051
GOTERM_BP_5	GO:0019219~regulation of nucleobase, nucleoside, nucleotide and nucleic acid metabolic process	270	4.75312e-10	ENSMUSG00000063281, ENSMUSG00000063632, ENSMUSG00000018501, ENSMUSG00000038418, ENSMUSG00000021514, ENSMUSG00000061911, ENSMUSG00000021264, ENSMUSG00000029684, ENSMUSG00000046185, ENSMUSG00000025782, ENSMUSG00000072872, ENSMUSG00000013089, ENSMUSG00000033623, ENSMUSG00000009575, ENSMUSG00000027104, ENSMUSG00000037174, ENSMUSG00000020708, ENSMUSG00000015839, ENSMUSG00000031245, ENSMUSG00000078427,…	1.40117	7.94166e-07	8.10009
GOTERM_BP_5	GO:0016568~chromatin modification	48	7.54837e-09	ENSMUSG00000037935, ENSMUSG00000004099, ENSMUSG00000002028, ENSMUSG00000030232, ENSMUSG00000056216, ENSMUSG00000040363, ENSMUSG00000036959, ENSMUSG00000029279, ENSMUSG00000030816, ENSMUSG00000021488, ENSMUSG00000049327, ENSMUSG00000057406, ENSMUSG00000015697, ENSMUSG00000042207, ENSMUSG00000018476, ENSMUSG00000031715, ENSMUSG00000018501, ENSMUSG00000037111, ENSMUSG00000040481, ENSMUSG00000070697,…	2.48358	1.2612e-05	6.89921
GOTERM_BP_5	GO:0044257~cellular protein catabolic process	79	3.40272e-07	ENSMUSG00000032307, ENSMUSG00000003226, ENSMUSG00000039701, ENSMUSG00000005371, ENSMUSG00000035247, ENSMUSG00000030451, ENSMUSG00000025103, ENSMUSG00000045210, ENSMUSG00000004364, ENSMUSG00000031010, ENSMUSG00000032905, ENSMUSG00000025340, ENSMUSG00000029640, ENSMUSG00000009293, ENSMUSG00000041773, ENSMUSG00000020124, ENSMUSG00000035048, ENSMUSG00000052593, ENSMUSG00000021024, ENSMUSG00000028309,…	1.7964	0.000568535	5.24524
GOTERM_BP_5	GO:0010605~negative regulation of macromolecule metabolic process	75	5.27904e-07	ENSMUSG00000029478, ENSMUSG00000005370, ENSMUSG00000040761, ENSMUSG00000003032, ENSMUSG00000018476, ENSMUSG00000020849, ENSMUSG00000008730, ENSMUSG00000037235, ENSMUSG00000028676, ENSMUSG00000018501, ENSMUSG00000031715, ENSMUSG00000028842, ENSMUSG00000038418, ENSMUSG00000040481, ENSMUSG00000037992, ENSMUSG00000004768, ENSMUSG00000032402, ENSMUSG00000008976, ENSMUSG00000031609, ENSMUSG00000071757,…	1.80992	0.000882035	5.05451
GOTERM_BP_5	GO:0043632~modification-dependent macromolecule catabolic process	75	6.17278e-07	ENSMUSG00000032307, ENSMUSG00000003226, ENSMUSG00000039701, ENSMUSG00000005371, ENSMUSG00000035247, ENSMUSG00000030451, ENSMUSG00000025103, ENSMUSG00000045210, ENSMUSG00000004364, ENSMUSG00000031010, ENSMUSG00000032905, ENSMUSG00000025340, ENSMUSG00000029640, ENSMUSG00000009293, ENSMUSG00000041773, ENSMUSG00000020124, ENSMUSG00000035048, ENSMUSG00000021024, ENSMUSG00000028309, ENSMUSG00000024294,…	1.8028	0.00103136	4.98659
GOTERM_BP_5	GO:0010629~negative regulation of gene expression	64	6.85851e-07	ENSMUSG00000029478, ENSMUSG00000040761, ENSMUSG00000003032, ENSMUSG00000018476, ENSMUSG00000008730, ENSMUSG00000037235, ENSMUSG00000031715, ENSMUSG00000018501, ENSMUSG00000028842, ENSMUSG00000038418, ENSMUSG00000040481, ENSMUSG00000037992, ENSMUSG00000032402, ENSMUSG00000008976, ENSMUSG00000031609, ENSMUSG00000071757, ENSMUSG00000031353, ENSMUSG00000022361, ENSMUSG00000054387, ENSMUSG00000072872,…	1.9061	0.00114593	4.94084
GOTERM_BP_5	GO:0030163~protein catabolic process	79	1.38184e-06	ENSMUSG00000032307, ENSMUSG00000003226, ENSMUSG00000039701, ENSMUSG00000005371, ENSMUSG00000035247, ENSMUSG00000030451, ENSMUSG00000025103, ENSMUSG00000045210, ENSMUSG00000004364, ENSMUSG00000031010, ENSMUSG00000032905, ENSMUSG00000025340, ENSMUSG00000029640, ENSMUSG00000009293, ENSMUSG00000041773, ENSMUSG00000020124, ENSMUSG00000035048, ENSMUSG00000052593, ENSMUSG00000021024, ENSMUSG00000028309,…	1.73501	0.0023088	4.63661
GOTERM_BP_5	GO:0010558~negative regulation of macromolecule biosynthetic process	61	1.15614e-05	ENSMUSG00000029478, ENSMUSG00000040761, ENSMUSG00000003032, ENSMUSG00000018476, ENSMUSG00000008730, ENSMUSG00000037235, ENSMUSG00000031715, ENSMUSG00000018501, ENSMUSG00000028842, ENSMUSG00000038418, ENSMUSG00000040481, ENSMUSG00000037992, ENSMUSG00000032402, ENSMUSG00000008976, ENSMUSG00000031609, ENSMUSG00000071757, ENSMUSG00000031353, ENSMUSG00000022361, ENSMUSG00000054387, ENSMUSG00000072872,…	1.78198	0.0193154	3.7141
GOTERM_BP_5	GO:0006464~protein modification process	145	1.33425e-05	ENSMUSG00000032307, ENSMUSG00000009828, ENSMUSG00000024360, ENSMUSG00000025060, ENSMUSG00000034761, ENSMUSG00000021457, ENSMUSG00000030451, ENSMUSG00000032501, ENSMUSG00000073563, ENSMUSG00000046378, ENSMUSG00000030062, ENSMUSG00000022263, ENSMUSG00000021116, ENSMUSG00000028062, ENSMUSG00000024789, ENSMUSG00000032437, ENSMUSG00000020387, ENSMUSG00000018648, ENSMUSG00000041180, ENSMUSG00000052833,…	1.40523	0.0222908	3.65188
GOTERM_BP_5	GO:0031327~negative regulation of cellular biosynthetic process	62	1.41706e-05	ENSMUSG00000029478, ENSMUSG00000040761, ENSMUSG00000003032, ENSMUSG00000018476, ENSMUSG00000008730, ENSMUSG00000037235, ENSMUSG00000031715, ENSMUSG00000018501, ENSMUSG00000028842, ENSMUSG00000038418, ENSMUSG00000040481, ENSMUSG00000037992, ENSMUSG00000032402, ENSMUSG00000008976, ENSMUSG00000031609, ENSMUSG00000071757, ENSMUSG00000031353, ENSMUSG00000022361, ENSMUSG00000054387, ENSMUSG00000072872,…	1.76065	0.023674	3.62573
GOTERM_BP_5	GO:0031324~negative regulation of cellular metabolic process	68	1.72241e-05	ENSMUSG00000029478, ENSMUSG00000005370, ENSMUSG00000040761, ENSMUSG00000003032, ENSMUSG00000018476, ENSMUSG00000020849, ENSMUSG00000008730, ENSMUSG00000037235, ENSMUSG00000031715, ENSMUSG00000028676, ENSMUSG00000018501, ENSMUSG00000028842, ENSMUSG00000038418, ENSMUSG00000040481, ENSMUSG00000037992, ENSMUSG00000004768, ENSMUSG00000032402, ENSMUSG00000008976, ENSMUSG00000031609, ENSMUSG00000071757,…	1.69805	0.0287746	3.54099
GOTERM_BP_5	GO:0009890~negative regulation of biosynthetic process	62	1.88432e-05	ENSMUSG00000029478, ENSMUSG00000040761, ENSMUSG00000003032, ENSMUSG00000018476, ENSMUSG00000008730, ENSMUSG00000037235, ENSMUSG00000031715, ENSMUSG00000018501, ENSMUSG00000028842, ENSMUSG00000038418, ENSMUSG00000040481, ENSMUSG00000037992, ENSMUSG00000032402, ENSMUSG00000008976, ENSMUSG00000031609, ENSMUSG00000071757, ENSMUSG00000031353, ENSMUSG00000022361, ENSMUSG00000054387, ENSMUSG00000072872,…	1.74442	0.0314792	3.50198
GOTERM_BP_5	GO:0006913~nucleocytoplasmic transport	22	2.48879e-05	ENSMUSG00000038393, ENSMUSG00000022538, ENSMUSG00000016619, ENSMUSG00000024789, ENSMUSG00000040463, ENSMUSG00000055116, ENSMUSG00000022774, ENSMUSG00000009470, ENSMUSG00000028676, ENSMUSG00000028330, ENSMUSG00000024359, ENSMUSG00000010097, ENSMUSG00000021253, ENSMUSG00000021974, ENSMUSG00000054693, ENSMUSG00000006005, ENSMUSG00000020315, ENSMUSG00000066232, ENSMUSG00000027782, ENSMUSG00000034544,…	2.79834	0.0415754	3.38116
GOTERM_BP_5	GO:0051169~nuclear transport	22	3.45375e-05	ENSMUSG00000038393, ENSMUSG00000022538, ENSMUSG00000016619, ENSMUSG00000024789, ENSMUSG00000040463, ENSMUSG00000055116, ENSMUSG00000022774, ENSMUSG00000009470, ENSMUSG00000028676, ENSMUSG00000028330, ENSMUSG00000024359, ENSMUSG00000010097, ENSMUSG00000021253, ENSMUSG00000021974, ENSMUSG00000054693, ENSMUSG00000006005, ENSMUSG00000020315, ENSMUSG00000066232, ENSMUSG00000027782, ENSMUSG00000034544,…	2.74123	0.0576906	3.23889
GOTERM_BP_5	GO:0045934~negative regulation of nucleobase, nucleoside, nucleotide and nucleic acid metabolic process	57	3.71811e-05	ENSMUSG00000029478, ENSMUSG00000005370, ENSMUSG00000040761, ENSMUSG00000003032, ENSMUSG00000018476, ENSMUSG00000008730, ENSMUSG00000037235, ENSMUSG00000031715, ENSMUSG00000028676, ENSMUSG00000018501, ENSMUSG00000038418, ENSMUSG00000040481, ENSMUSG00000037992, ENSMUSG00000032402, ENSMUSG00000008976, ENSMUSG00000031609, ENSMUSG00000071757, ENSMUSG00000031353, ENSMUSG00000022361, ENSMUSG00000054387,…	1.75321	0.0621051	3.20687
GOTERM_BP_5	GO:0016481~negative regulation of transcription	54	4.56281e-05	ENSMUSG00000029478, ENSMUSG00000040761, ENSMUSG00000003032, ENSMUSG00000018476, ENSMUSG00000008730, ENSMUSG00000037235, ENSMUSG00000031715, ENSMUSG00000018501, ENSMUSG00000038418, ENSMUSG00000040481, ENSMUSG00000037992, ENSMUSG00000032402, ENSMUSG00000008976, ENSMUSG00000031609, ENSMUSG00000071757, ENSMUSG00000031353, ENSMUSG00000022361, ENSMUSG00000054387, ENSMUSG00000072872, ENSMUSG00000034271,…	1.77256	0.0762094	3.11799
GOTERM_BP_5	GO:0051172~negative regulation of nitrogen compound metabolic process	57	4.9416e-05	ENSMUSG00000029478, ENSMUSG00000005370, ENSMUSG00000040761, ENSMUSG00000003032, ENSMUSG00000018476, ENSMUSG00000008730, ENSMUSG00000037235, ENSMUSG00000031715, ENSMUSG00000028676, ENSMUSG00000018501, ENSMUSG00000038418, ENSMUSG00000040481, ENSMUSG00000037992, ENSMUSG00000032402, ENSMUSG00000008976, ENSMUSG00000031609, ENSMUSG00000071757, ENSMUSG00000031353, ENSMUSG00000022361, ENSMUSG00000054387,…	1.73572	0.0825337	3.08337
GOTERM_BP_5	GO:0010608~posttranscriptional regulation of gene expression	28	5.97343e-05	ENSMUSG00000028609, ENSMUSG00000026254, ENSMUSG00000021149, ENSMUSG00000028842, ENSMUSG00000005610, ENSMUSG00000009549, ENSMUSG00000023951, ENSMUSG00000031668, ENSMUSG00000020594, ENSMUSG00000027002, ENSMUSG00000021116, ENSMUSG00000022892, ENSMUSG00000034617, ENSMUSG00000042500, ENSMUSG00000022718, ENSMUSG00000046062, ENSMUSG00000022774, ENSMUSG00000038374, ENSMUSG00000027680, ENSMUSG00000039456,…	2.31018	0.099759	3.00105
GOTERM_BP_5	GO:0051246~regulation of protein metabolic process	51	7.4699e-05	ENSMUSG00000032307, ENSMUSG00000028609, ENSMUSG00000026254, ENSMUSG00000032601, ENSMUSG00000020849, ENSMUSG00000018501, ENSMUSG00000028842, ENSMUSG00000021457, ENSMUSG00000000489, ENSMUSG00000005610, ENSMUSG00000004768, ENSMUSG00000009293, ENSMUSG00000021116, ENSMUSG00000054051, ENSMUSG00000054387, ENSMUSG00000024789, ENSMUSG00000022774, ENSMUSG00000027680, ENSMUSG00000038374, ENSMUSG00000028330,…	1.77424	0.124736	2.90401
GOTERM_BP_5	GO:0051253~negative regulation of RNA metabolic process	45	0.000215281	ENSMUSG00000004099, ENSMUSG00000029478, ENSMUSG00000040363, ENSMUSG00000040761, ENSMUSG00000021488, ENSMUSG00000003032, ENSMUSG00000018476, ENSMUSG00000036052, ENSMUSG00000008730, ENSMUSG00000035877, ENSMUSG00000031715, ENSMUSG00000018501, ENSMUSG00000028676, ENSMUSG00000038418, ENSMUSG00000003382, ENSMUSG00000040481, ENSMUSG00000027439, ENSMUSG00000037992, ENSMUSG00000025019, ENSMUSG00000027177,…	1.77256	0.35909	2.4448
GOTERM_BP_5	GO:0050658~RNA transport	16	0.000224051	ENSMUSG00000003226, ENSMUSG00000028609, ENSMUSG00000016619, ENSMUSG00000022774, ENSMUSG00000038374, ENSMUSG00000029405, ENSMUSG00000028676, ENSMUSG00000028330, ENSMUSG00000026491, ENSMUSG00000010097, ENSMUSG00000000838, ENSMUSG00000004980, ENSMUSG00000078676, ENSMUSG00000063895, ENSMUSG00000046434, ENSMUSG00000020290	2.96023	0.373694	2.42748
GOTERM_BP_5	GO:0050657~nucleic acid transport	16	0.000224051	ENSMUSG00000003226, ENSMUSG00000028609, ENSMUSG00000016619, ENSMUSG00000022774, ENSMUSG00000038374, ENSMUSG00000029405, ENSMUSG00000028676, ENSMUSG00000028330, ENSMUSG00000026491, ENSMUSG00000010097, ENSMUSG00000000838, ENSMUSG00000004980, ENSMUSG00000078676, ENSMUSG00000063895, ENSMUSG00000046434, ENSMUSG00000020290	2.96023	0.373694	2.42748
GOTERM_BP_5	GO:0051348~negative regulation of transferase activity	14	0.000260565	ENSMUSG00000009073, ENSMUSG00000022136, ENSMUSG00000022114, ENSMUSG00000021670, ENSMUSG00000027351, ENSMUSG00000027177, ENSMUSG00000021959, ENSMUSG00000019969, ENSMUSG00000045671, ENSMUSG00000023067, ENSMUSG00000048878, ENSMUSG00000021892, ENSMUSG00000024975, ENSMUSG00000024427	3.22553	0.434469	2.36204
GOTERM_BP_5	GO:0015031~protein transport	79	0.000354552	ENSMUSG00000003226, ENSMUSG00000041670, ENSMUSG00000037234, ENSMUSG00000020849, ENSMUSG00000039367, ENSMUSG00000032504, ENSMUSG00000025340, ENSMUSG00000026577, ENSMUSG00000004768, ENSMUSG00000027828, ENSMUSG00000030082, ENSMUSG00000032042, ENSMUSG00000044465, ENSMUSG00000021124, ENSMUSG00000030805, ENSMUSG00000019861, ENSMUSG00000021062, ENSMUSG00000022538, ENSMUSG00000022443, ENSMUSG00000024789,…	1.48182	0.590749	2.2286
GOTERM_BP_5	GO:0032268~regulation of cellular protein metabolic process	41	0.000358521	ENSMUSG00000052684, ENSMUSG00000002028, ENSMUSG00000028609, ENSMUSG00000026254, ENSMUSG00000021149, ENSMUSG00000032601, ENSMUSG00000020849, ENSMUSG00000018501, ENSMUSG00000028842, ENSMUSG00000021457, ENSMUSG00000000489, ENSMUSG00000005610, ENSMUSG00000009549, ENSMUSG00000004768, ENSMUSG00000027177, ENSMUSG00000020612, ENSMUSG00000031668, ENSMUSG00000020594, ENSMUSG00000021116, ENSMUSG00000054051,…	1.78803	0.597344	2.22378
GOTERM_BP_5	GO:0045892~negative regulation of transcription, DNA-dependent	44	0.000362914	ENSMUSG00000004099, ENSMUSG00000029478, ENSMUSG00000040363, ENSMUSG00000040761, ENSMUSG00000021488, ENSMUSG00000003032, ENSMUSG00000018476, ENSMUSG00000036052, ENSMUSG00000008730, ENSMUSG00000035877, ENSMUSG00000031715, ENSMUSG00000018501, ENSMUSG00000038418, ENSMUSG00000003382, ENSMUSG00000040481, ENSMUSG00000027439, ENSMUSG00000025019, ENSMUSG00000037992, ENSMUSG00000027177, ENSMUSG00000020358,…	1.74442	0.604642	2.2185
GOTERM_BP_5	GO:0051028~mRNA transport	15	0.000386216	ENSMUSG00000003226, ENSMUSG00000028609, ENSMUSG00000016619, ENSMUSG00000022774, ENSMUSG00000038374, ENSMUSG00000029405, ENSMUSG00000028676, ENSMUSG00000028330, ENSMUSG00000026491, ENSMUSG00000010097, ENSMUSG00000000838, ENSMUSG00000078676, ENSMUSG00000063895, ENSMUSG00000046434, ENSMUSG00000020290	2.95426	0.643347	2.19155
GOTERM_BP_5	GO:0006417~regulation of translation	20	0.000419958	ENSMUSG00000021116, ENSMUSG00000028609, ENSMUSG00000026254, ENSMUSG00000022892, ENSMUSG00000042500, ENSMUSG00000046062, ENSMUSG00000022774, ENSMUSG00000027680, ENSMUSG00000038374, ENSMUSG00000028330, ENSMUSG00000028842, ENSMUSG00000045983, ENSMUSG00000005610, ENSMUSG00000009549, ENSMUSG00000026740, ENSMUSG00000031668, ENSMUSG00000078676, ENSMUSG00000078427, ENSMUSG00000020594, ENSMUSG00000047888	2.44219	0.699369	2.15529
GOTERM_BP_5	GO:0006333~chromatin assembly or disassembly	21	0.000481882	ENSMUSG00000002748, ENSMUSG00000056216, ENSMUSG00000062270, ENSMUSG00000082229, ENSMUSG00000048118, ENSMUSG00000018474, ENSMUSG00000063870, ENSMUSG00000079184, ENSMUSG00000031715, ENSMUSG00000018666, ENSMUSG00000016559, ENSMUSG00000009575, ENSMUSG00000024921, ENSMUSG00000054766, ENSMUSG00000056608, ENSMUSG00000031758, ENSMUSG00000005045, ENSMUSG00000060032, ENSMUSG00000032481, ENSMUSG00000058799,…	2.35257	0.802103	2.09577
GOTERM_BP_5	GO:0043549~regulation of kinase activity	30	0.000921356	ENSMUSG00000021149, ENSMUSG00000009073, ENSMUSG00000021457, ENSMUSG00000025422, ENSMUSG00000071369, ENSMUSG00000040687, ENSMUSG00000032501, ENSMUSG00000027177, ENSMUSG00000045671, ENSMUSG00000023067, ENSMUSG00000048878, ENSMUSG00000060477, ENSMUSG00000024427, ENSMUSG00000030983, ENSMUSG00000054051, ENSMUSG00000028062, ENSMUSG00000022892, ENSMUSG00000022136, ENSMUSG00000022114, ENSMUSG00000027351,…	1.90796	1.52834	1.81578
GOTERM_BP_5	GO:0006605~protein targeting	23	0.00111598	ENSMUSG00000038393, ENSMUSG00000024789, ENSMUSG00000026280, ENSMUSG00000021686, ENSMUSG00000055116, ENSMUSG00000020849, ENSMUSG00000009470, ENSMUSG00000024359, ENSMUSG00000009549, ENSMUSG00000021253, ENSMUSG00000021974, ENSMUSG00000027828, ENSMUSG00000067279, ENSMUSG00000006005, ENSMUSG00000032536, ENSMUSG00000051391, ENSMUSG00000032042, ENSMUSG00000020315, ENSMUSG00000027782, ENSMUSG00000066232,…	2.11167	1.84836	1.73321
GOTERM_BP_5	GO:0008286~insulin receptor signaling pathway	9	0.00137833	ENSMUSG00000037112, ENSMUSG00000027540, ENSMUSG00000038894, ENSMUSG00000024539, ENSMUSG00000027288, ENSMUSG00000038485, ENSMUSG00000042903, ENSMUSG00000032253, ENSMUSG00000027303	3.92495	2.27819	1.64241
GOTERM_BP_5	GO:0007167~enzyme linked receptor protein signaling pathway	38	0.00157257	ENSMUSG00000037112, ENSMUSG00000020053, ENSMUSG00000032253, ENSMUSG00000038485, ENSMUSG00000021457, ENSMUSG00000028907, ENSMUSG00000019947, ENSMUSG00000000489, ENSMUSG00000024241, ENSMUSG00000031010, ENSMUSG00000005533, ENSMUSG00000023951, ENSMUSG00000032402, ENSMUSG00000028289, ENSMUSG00000031668, ENSMUSG00000029648, ENSMUSG00000020315, ENSMUSG00000038393, ENSMUSG00000040268, ENSMUSG00000027540,…	1.69969	2.59529	1.58581
GOTERM_BP_5	GO:0051329~interphase of mitotic cell cycle	12	0.00167622	ENSMUSG00000029014, ENSMUSG00000057469, ENSMUSG00000000184, ENSMUSG00000022892, ENSMUSG00000021959, ENSMUSG00000040957, ENSMUSG00000025809, ENSMUSG00000057329, ENSMUSG00000042903, ENSMUSG00000006678, ENSMUSG00000020184, ENSMUSG00000026605	2.99044	2.76411	1.55844
GOTERM_BP_5	GO:0016310~phosphorylation	82	0.001678	ENSMUSG00000009828, ENSMUSG00000020032, ENSMUSG00000025060, ENSMUSG00000018209, ENSMUSG00000008730, ENSMUSG00000034761, ENSMUSG00000021457, ENSMUSG00000032501, ENSMUSG00000040687, ENSMUSG00000073563, ENSMUSG00000028289, ENSMUSG00000004865, ENSMUSG00000024014, ENSMUSG00000032547, ENSMUSG00000000416, ENSMUSG00000029648, ENSMUSG00000038145, ENSMUSG00000017291, ENSMUSG00000022263, ENSMUSG00000060477,…	1.39456	2.767	1.55799
GOTERM_BP_5	GO:0006886~intracellular protein transport	38	0.00191158	ENSMUSG00000041670, ENSMUSG00000021686, ENSMUSG00000055116, ENSMUSG00000039367, ENSMUSG00000020849, ENSMUSG00000009549, ENSMUSG00000026577, ENSMUSG00000027828, ENSMUSG00000067279, ENSMUSG00000030082, ENSMUSG00000051391, ENSMUSG00000032042, ENSMUSG00000020315, ENSMUSG00000027782, ENSMUSG00000024480, ENSMUSG00000024847, ENSMUSG00000021124, ENSMUSG00000000531, ENSMUSG00000022285, ENSMUSG00000038393,…	1.68122	3.14641	1.50218
GOTERM_BP_5	GO:0034470~ncRNA processing	25	0.00226801	ENSMUSG00000060152, ENSMUSG00000079470, ENSMUSG00000030521, ENSMUSG00000031403, ENSMUSG00000025047, ENSMUSG00000031527, ENSMUSG00000053286, ENSMUSG00000028907, ENSMUSG00000028729, ENSMUSG00000028322, ENSMUSG00000026127, ENSMUSG00000035575, ENSMUSG00000021595, ENSMUSG00000026019, ENSMUSG00000028010, ENSMUSG00000003848, ENSMUSG00000061032, ENSMUSG00000040738, ENSMUSG00000038279, ENSMUSG00000033285,…	1.93211	3.7227	1.42914
GOTERM_BP_5	GO:0051325~interphase	12	0.00235723	ENSMUSG00000029014, ENSMUSG00000057469, ENSMUSG00000000184, ENSMUSG00000022892, ENSMUSG00000021959, ENSMUSG00000040957, ENSMUSG00000025809, ENSMUSG00000057329, ENSMUSG00000042903, ENSMUSG00000006678, ENSMUSG00000020184, ENSMUSG00000026605	2.87316	3.86645	1.41269
GOTERM_BP_5	GO:0006983~ER overload response	5	0.00238431	ENSMUSG00000025408, ENSMUSG00000031668, ENSMUSG00000046062, ENSMUSG00000078622, ENSMUSG00000026864	7.63184	3.91004	1.40782
GOTERM_BP_5	GO:0007219~Notch signaling pathway	12	0.00378236	ENSMUSG00000052593, ENSMUSG00000039982, ENSMUSG00000054693, ENSMUSG00000024294, ENSMUSG00000022892, ENSMUSG00000040761, ENSMUSG00000019969, ENSMUSG00000001300, ENSMUSG00000020964, ENSMUSG00000028086, ENSMUSG00000026019, ENSMUSG00000019789	2.71354	6.13538	1.21216
GOTERM_BP_5	GO:0050684~regulation of mRNA processing	5	0.00401514	ENSMUSG00000004865, ENSMUSG00000032580, ENSMUSG00000028330, ENSMUSG00000028676, ENSMUSG00000074102	6.78386	6.50117	1.18701
GOTERM_BP_5	GO:0034660~ncRNA metabolic process	29	0.00402794	ENSMUSG00000026615, ENSMUSG00000060152, ENSMUSG00000024587, ENSMUSG00000079470, ENSMUSG00000030521, ENSMUSG00000031403, ENSMUSG00000025047, ENSMUSG00000031527, ENSMUSG00000053286, ENSMUSG00000028907, ENSMUSG00000028729, ENSMUSG00000026127, ENSMUSG00000028322, ENSMUSG00000035575, ENSMUSG00000022241, ENSMUSG00000021595, ENSMUSG00000026019, ENSMUSG00000028010, ENSMUSG00000003848, ENSMUSG00000061032,…	1.75306	6.52125	1.18567
GOTERM_BP_5	GO:0051252~regulation of RNA metabolic process	150	0.00415534	ENSMUSG00000040761, ENSMUSG00000032580, ENSMUSG00000063632, ENSMUSG00000018501, ENSMUSG00000031715, ENSMUSG00000039634, ENSMUSG00000038418, ENSMUSG00000021514, ENSMUSG00000061911, ENSMUSG00000037868, ENSMUSG00000029238, ENSMUSG00000026436, ENSMUSG00000025408, ENSMUSG00000008976, ENSMUSG00000021264, ENSMUSG00000002455, ENSMUSG00000038615, ENSMUSG00000071757, ENSMUSG00000051510, ENSMUSG00000046185,…	1.23094	6.72083	1.17258
GOTERM_BP_5	GO:0007242~intracellular signaling cascade	98	0.00419209	ENSMUSG00000031442, ENSMUSG00000009828, ENSMUSG00000030733, ENSMUSG00000034761, ENSMUSG00000021457, ENSMUSG00000035109, ENSMUSG00000022957, ENSMUSG00000026430, ENSMUSG00000022263, ENSMUSG00000038611, ENSMUSG00000021062, ENSMUSG00000031511, ENSMUSG00000028062, ENSMUSG00000024789, ENSMUSG00000027500, ENSMUSG00000030265, ENSMUSG00000036894, ENSMUSG00000062232, ENSMUSG00000018965, ENSMUSG00000028832,…	1.30784	6.77832	1.16888
GOTERM_BP_5	GO:0043414~biopolymer methylation	14	0.00456305	ENSMUSG00000002028, ENSMUSG00000020661, ENSMUSG00000004099, ENSMUSG00000024360, ENSMUSG00000021488, ENSMUSG00000079184, ENSMUSG00000022160, ENSMUSG00000062203, ENSMUSG00000028233, ENSMUSG00000005698, ENSMUSG00000038056, ENSMUSG00000020706, ENSMUSG00000030350, ENSMUSG00000030619	2.40779	7.35686	1.13331
GOTERM_BP_5	GO:0051174~regulation of phosphorus metabolic process	39	0.00473566	ENSMUSG00000052684, ENSMUSG00000021149, ENSMUSG00000009073, ENSMUSG00000032601, ENSMUSG00000020849, ENSMUSG00000021457, ENSMUSG00000000489, ENSMUSG00000025422, ENSMUSG00000071369, ENSMUSG00000040687, ENSMUSG00000032501, ENSMUSG00000027177, ENSMUSG00000020612, ENSMUSG00000033792, ENSMUSG00000045671, ENSMUSG00000023067, ENSMUSG00000048878, ENSMUSG00000060477, ENSMUSG00000030983, ENSMUSG00000024427,…	1.58215	7.6249	1.11777
GOTERM_BP_5	GO:0019220~regulation of phosphate metabolic process	39	0.00473566	ENSMUSG00000052684, ENSMUSG00000021149, ENSMUSG00000009073, ENSMUSG00000032601, ENSMUSG00000020849, ENSMUSG00000021457, ENSMUSG00000000489, ENSMUSG00000025422, ENSMUSG00000071369, ENSMUSG00000040687, ENSMUSG00000032501, ENSMUSG00000027177, ENSMUSG00000020612, ENSMUSG00000033792, ENSMUSG00000045671, ENSMUSG00000023067, ENSMUSG00000048878, ENSMUSG00000060477, ENSMUSG00000030983, ENSMUSG00000024427,…	1.58215	7.6249	1.11777
GOTERM_BP_5	GO:0009452~RNA capping	4	0.00481436	ENSMUSG00000028274, ENSMUSG00000022774, ENSMUSG00000028330, ENSMUSG00000028233	9.76876	7.74687	1.11087
GOTERM_BP_5	GO:0033365~protein localization in organelle	17	0.00517714	ENSMUSG00000038393, ENSMUSG00000078970, ENSMUSG00000024789, ENSMUSG00000055116, ENSMUSG00000009470, ENSMUSG00000039456, ENSMUSG00000033953, ENSMUSG00000009549, ENSMUSG00000021253, ENSMUSG00000021974, ENSMUSG00000006005, ENSMUSG00000032042, ENSMUSG00000020315, ENSMUSG00000066232, ENSMUSG00000027782, ENSMUSG00000024847, ENSMUSG00000020290	2.14006	8.30716	1.08055
GOTERM_BP_5	GO:0016458~gene silencing	12	0.00582385	ENSMUSG00000004099, ENSMUSG00000020661, ENSMUSG00000042500, ENSMUSG00000070697, ENSMUSG00000022718, ENSMUSG00000037364, ENSMUSG00000022774, ENSMUSG00000031527, ENSMUSG00000028330, ENSMUSG00000031715, ENSMUSG00000028842, ENSMUSG00000047888	2.57073	9.29803	1.03161
GOTERM_BP_5	GO:0009966~regulation of signal transduction	73	0.00692908	ENSMUSG00000023353, ENSMUSG00000031442, ENSMUSG00000020021, ENSMUSG00000018501, ENSMUSG00000021457, ENSMUSG00000000489, ENSMUSG00000032501, ENSMUSG00000040687, ENSMUSG00000026360, ENSMUSG00000004768, ENSMUSG00000022957, ENSMUSG00000032402, ENSMUSG00000022263, ENSMUSG00000001707, ENSMUSG00000032186, ENSMUSG00000060477, ENSMUSG00000024427, ENSMUSG00000052593, ENSMUSG00000031511, ENSMUSG00000054051,…	1.34856	10.9682
GOTERM_BP_5	GO:0032869~cellular response to insulin stimulus	10	0.00705633	ENSMUSG00000037112, ENSMUSG00000027540, ENSMUSG00000038894, ENSMUSG00000024539, ENSMUSG00000027288, ENSMUSG00000019699, ENSMUSG00000038485, ENSMUSG00000042903, ENSMUSG00000032253, ENSMUSG00000027303	2.83975	11.1586
GOTERM_BP_5	GO:0006412~translation	40	0.00727156	ENSMUSG00000026615, ENSMUSG00000025967, ENSMUSG00000024587, ENSMUSG00000026254, ENSMUSG00000030738, ENSMUSG00000024360, ENSMUSG00000019774, ENSMUSG00000061983, ENSMUSG00000006941, ENSMUSG00000071415, ENSMUSG00000058558, ENSMUSG00000024991, ENSMUSG00000074656, ENSMUSG00000005610, ENSMUSG00000059291, ENSMUSG00000019505, ENSMUSG00000039680, ENSMUSG00000042426, ENSMUSG00000039804, ENSMUSG00000057561,…	1.53115	11.4798
GOTERM_BP_5	GO:0006929~substrate-bound cell migration	4	0.00904461	ENSMUSG00000023905, ENSMUSG00000055805, ENSMUSG00000000489, ENSMUSG00000020900	8.14063	14.0846
GOTERM_BP_5	GO:0006355~regulation of transcription, DNA-dependent	145	0.00911883	ENSMUSG00000040761, ENSMUSG00000063632, ENSMUSG00000018501, ENSMUSG00000031715, ENSMUSG00000039634, ENSMUSG00000038418, ENSMUSG00000021514, ENSMUSG00000037868, ENSMUSG00000061911, ENSMUSG00000029238, ENSMUSG00000026436, ENSMUSG00000025408, ENSMUSG00000008976, ENSMUSG00000021264, ENSMUSG00000002455, ENSMUSG00000038615, ENSMUSG00000071757, ENSMUSG00000051510, ENSMUSG00000046185, ENSMUSG00000072872,…	1.20859	14.1921
GOTERM_BP_5	GO:0006351~transcription, DNA-dependent	19	0.0101941	ENSMUSG00000043962, ENSMUSG00000048100, ENSMUSG00000025782, ENSMUSG00000028899, ENSMUSG00000027395, ENSMUSG00000024613, ENSMUSG00000031585, ENSMUSG00000078941, ENSMUSG00000000776, ENSMUSG00000025019, ENSMUSG00000047649, ENSMUSG00000025408, ENSMUSG00000032402, ENSMUSG00000039117, ENSMUSG00000004040, ENSMUSG00000038611, ENSMUSG00000018160, ENSMUSG00000040354, ENSMUSG00000006599	1.9017	15.7347
GOTERM_BP_5	GO:0016311~dephosphorylation	21	0.0107419	ENSMUSG00000037926, ENSMUSG00000027531, ENSMUSG00000027540, ENSMUSG00000018648, ENSMUSG00000026309, ENSMUSG00000032290, ENSMUSG00000029147, ENSMUSG00000031530, ENSMUSG00000028274, ENSMUSG00000014956, ENSMUSG00000028771, ENSMUSG00000021987, ENSMUSG00000024539, ENSMUSG00000025477, ENSMUSG00000057329, ENSMUSG00000019907, ENSMUSG00000018401, ENSMUSG00000026064, ENSMUSG00000019960, ENSMUSG00000023805,…	1.81865	16.5106
GOTERM_BP_5	GO:0007264~small GTPase mediated signal transduction	33	0.0116416	ENSMUSG00000023353, ENSMUSG00000031442, ENSMUSG00000052681, ENSMUSG00000050029, ENSMUSG00000027363, ENSMUSG00000017144, ENSMUSG00000034209, ENSMUSG00000025733, ENSMUSG00000024241, ENSMUSG00000025422, ENSMUSG00000034801, ENSMUSG00000073639, ENSMUSG00000049892, ENSMUSG00000004768, ENSMUSG00000022957, ENSMUSG00000017418, ENSMUSG00000008859, ENSMUSG00000028945, ENSMUSG00000021062, ENSMUSG00000030265,…	1.56187	17.7702
GOTERM_BP_5	GO:0010970~microtubule-based transport	6	0.0126316	ENSMUSG00000006740, ENSMUSG00000022054, ENSMUSG00000022892, ENSMUSG00000022678, ENSMUSG00000025733, ENSMUSG00000021288	4.07032	19.1356
GOTERM_BP_5	GO:0006984~ER-nuclear signaling pathway	7	0.0135415	ENSMUSG00000025408, ENSMUSG00000031668, ENSMUSG00000015839, ENSMUSG00000046062, ENSMUSG00000018442, ENSMUSG00000078622, ENSMUSG00000026864	3.41906	20.3718
GOTERM_BP_5	GO:0042981~regulation of apoptosis	61	0.0138991	ENSMUSG00000005370, ENSMUSG00000048482, ENSMUSG00000032580, ENSMUSG00000060126, ENSMUSG00000020074, ENSMUSG00000008730, ENSMUSG00000027193, ENSMUSG00000028907, ENSMUSG00000040687, ENSMUSG00000022957, ENSMUSG00000028282, ENSMUSG00000025408, ENSMUSG00000028289, ENSMUSG00000024014, ENSMUSG00000023067, ENSMUSG00000001707, ENSMUSG00000060477, ENSMUSG00000052593, ENSMUSG00000031511, ENSMUSG00000054051,…	1.34696	20.8527
GOTERM_BP_5	GO:0032774~RNA biosynthetic process	19	0.0140056	ENSMUSG00000043962, ENSMUSG00000048100, ENSMUSG00000025782, ENSMUSG00000028899, ENSMUSG00000027395, ENSMUSG00000024613, ENSMUSG00000031585, ENSMUSG00000078941, ENSMUSG00000000776, ENSMUSG00000025019, ENSMUSG00000047649, ENSMUSG00000025408, ENSMUSG00000032402, ENSMUSG00000039117, ENSMUSG00000004040, ENSMUSG00000038611, ENSMUSG00000018160, ENSMUSG00000040354, ENSMUSG00000006599	1.84133	20.9954
GOTERM_BP_5	GO:0006606~protein import into nucleus	11	0.0143907	ENSMUSG00000021253, ENSMUSG00000038393, ENSMUSG00000021974, ENSMUSG00000006005, ENSMUSG00000024789, ENSMUSG00000055116, ENSMUSG00000020315, ENSMUSG00000009470, ENSMUSG00000066232, ENSMUSG00000027782, ENSMUSG00000020290	2.39858	21.5093
GOTERM_BP_5	GO:0030705~cytoskeleton-dependent intracellular transport	8	0.0155859	ENSMUSG00000006740, ENSMUSG00000022054, ENSMUSG00000022892, ENSMUSG00000022443, ENSMUSG00000022678, ENSMUSG00000025733, ENSMUSG00000021288, ENSMUSG00000020900	2.96023	23.0847
GOTERM_CC_5	GO:0005634~nucleus	589	6.27472e-50	ENSMUSG00000063281, ENSMUSG00000018501, ENSMUSG00000038418, ENSMUSG00000028907, ENSMUSG00000021514, ENSMUSG00000061911, ENSMUSG00000027455, ENSMUSG00000040824, ENSMUSG00000028902, ENSMUSG00000029684, ENSMUSG00000021116, ENSMUSG00000046185, ENSMUSG00000028309, ENSMUSG00000072872, ENSMUSG00000025782, ENSMUSG00000013089, ENSMUSG00000020257, ENSMUSG00000052833, ENSMUSG00000027649, ENSMUSG00000037174,…	1.65391	8.72953e-47	48.059
GOTERM_CC_5	GO:0043229~intracellular organelle	908	1.09677e-49	ENSMUSG00000019774, ENSMUSG00000063281, ENSMUSG00000039367, ENSMUSG00000032504, ENSMUSG00000018501, ENSMUSG00000018707, ENSMUSG00000046378, ENSMUSG00000029684, ENSMUSG00000025209, ENSMUSG00000046185, ENSMUSG00000035199, ENSMUSG00000024359, ENSMUSG00000025889, ENSMUSG00000037174, ENSMUSG00000041570, ENSMUSG00000019969, ENSMUSG00000025499, ENSMUSG00000030530, ENSMUSG00000026064, ENSMUSG00000019794,…	1.34397	1.52585e-46	47.8165
GOTERM_CC_5	GO:0043231~intracellular membrane-bounded organelle	828	1.02655e-45	ENSMUSG00000019774, ENSMUSG00000063281, ENSMUSG00000039367, ENSMUSG00000032504, ENSMUSG00000018501, ENSMUSG00000046378, ENSMUSG00000029684, ENSMUSG00000025209, ENSMUSG00000046185, ENSMUSG00000035199, ENSMUSG00000024359, ENSMUSG00000019969, ENSMUSG00000037174, ENSMUSG00000025499, ENSMUSG00000030530, ENSMUSG00000026064, ENSMUSG00000019794, ENSMUSG00000038539, ENSMUSG00000030521, ENSMUSG00000040463,…	1.38283	1.42815e-42	43.8452
GOTERM_CC_5	GO:0044446~intracellular organelle part	448	3.68283e-37	ENSMUSG00000032649, ENSMUSG00000039367, ENSMUSG00000032504, ENSMUSG00000018707, ENSMUSG00000018501, ENSMUSG00000028907, ENSMUSG00000027455, ENSMUSG00000040824, ENSMUSG00000046378, ENSMUSG00000028902, ENSMUSG00000025209, ENSMUSG00000025782, ENSMUSG00000072872, ENSMUSG00000022114, ENSMUSG00000020900, ENSMUSG00000019969, ENSMUSG00000041570, ENSMUSG00000020708, ENSMUSG00000022391, ENSMUSG00000033760,…	1.6995	5.12363e-34	35.2904
GOTERM_CC_5	GO:0044428~nuclear part	234	4.93513e-36	ENSMUSG00000018501, ENSMUSG00000028907, ENSMUSG00000040824, ENSMUSG00000035575, ENSMUSG00000021264, ENSMUSG00000028902, ENSMUSG00000042699, ENSMUSG00000020409, ENSMUSG00000029169, ENSMUSG00000025782, ENSMUSG00000072872, ENSMUSG00000022774, ENSMUSG00000009575, ENSMUSG00000003360, ENSMUSG00000019969, ENSMUSG00000020708, ENSMUSG00000031245, ENSMUSG00000033760, ENSMUSG00000020706, ENSMUSG00000007850,…	2.28466	6.86586e-33	34.1633
GOTERM_CC_5	GO:0070013~intracellular organelle lumen	205	8.92362e-29	ENSMUSG00000032649, ENSMUSG00000028907, ENSMUSG00000035575, ENSMUSG00000021264, ENSMUSG00000025209, ENSMUSG00000042699, ENSMUSG00000020409, ENSMUSG00000025782, ENSMUSG00000072872, ENSMUSG00000022774, ENSMUSG00000009575, ENSMUSG00000026740, ENSMUSG00000020708, ENSMUSG00000031245, ENSMUSG00000033760, ENSMUSG00000020706, ENSMUSG00000027248, ENSMUSG00000024782, ENSMUSG00000007850, ENSMUSG00000006599,…	2.19231	1.24147e-25	26.9061
GOTERM_CC_5	GO:0031981~nuclear lumen	172	9.498e-28	ENSMUSG00000055044, ENSMUSG00000071415, ENSMUSG00000020075, ENSMUSG00000020076, ENSMUSG00000031585, ENSMUSG00000028907, ENSMUSG00000026127, ENSMUSG00000029238, ENSMUSG00000035575, ENSMUSG00000021264, ENSMUSG00000061458, ENSMUSG00000021595, ENSMUSG00000041360, ENSMUSG00000042699, ENSMUSG00000020780, ENSMUSG00000003848, ENSMUSG00000020409, ENSMUSG00000048100, ENSMUSG00000072872, ENSMUSG00000025782,…	2.36018	1.32138e-24	25.879
GOTERM_CC_5	GO:0005730~nucleolus	76	4.50637e-18	ENSMUSG00000060152, ENSMUSG00000079470, ENSMUSG00000031403, ENSMUSG00000071415, ENSMUSG00000020075, ENSMUSG00000020076, ENSMUSG00000028907, ENSMUSG00000026127, ENSMUSG00000035575, ENSMUSG00000016018, ENSMUSG00000041923, ENSMUSG00000060475, ENSMUSG00000021595, ENSMUSG00000061458, ENSMUSG00000026019, ENSMUSG00000028010, ENSMUSG00000042699, ENSMUSG00000035049, ENSMUSG00000041360, ENSMUSG00000020780,…	2.9705	6.26936e-15	16.2028
GOTERM_CC_5	GO:0005737~cytoplasm	670	3.25793e-17	ENSMUSG00000018199, ENSMUSG00000032649, ENSMUSG00000026254, ENSMUSG00000024360, ENSMUSG00000019774, ENSMUSG00000024261, ENSMUSG00000039367, ENSMUSG00000032504, ENSMUSG00000018501, ENSMUSG00000018707, ENSMUSG00000025103, ENSMUSG00000028907, ENSMUSG00000073563, ENSMUSG00000027455, ENSMUSG00000022957, ENSMUSG00000046378, ENSMUSG00000033377, ENSMUSG00000025613, ENSMUSG00000026192, ENSMUSG00000029684,…	1.25511	4.53251e-14	15.3437
GOTERM_CC_5	GO:0030529~ribonucleoprotein complex	94	2.80047e-16	ENSMUSG00000060152, ENSMUSG00000018199, ENSMUSG00000079470, ENSMUSG00000028609, ENSMUSG00000040383, ENSMUSG00000032580, ENSMUSG00000031403, ENSMUSG00000060373, ENSMUSG00000071415, ENSMUSG00000039536, ENSMUSG00000027193, ENSMUSG00000028842, ENSMUSG00000025103, ENSMUSG00000028907, ENSMUSG00000026127, ENSMUSG00000059291, ENSMUSG00000040824, ENSMUSG00000023932, ENSMUSG00000045427, ENSMUSG00000034931,…	2.46526	4.66294e-13	14.3313
GOTERM_CC_5	GO:0005681~spliceosome	42	2.60544e-15	ENSMUSG00000040383, ENSMUSG00000028609, ENSMUSG00000032580, ENSMUSG00000024283, ENSMUSG00000032621, ENSMUSG00000060373, ENSMUSG00000063800, ENSMUSG00000027193, ENSMUSG00000039449, ENSMUSG00000032423, ENSMUSG00000059659, ENSMUSG00000022283, ENSMUSG00000040824, ENSMUSG00000023932, ENSMUSG00000059208, ENSMUSG00000034931, ENSMUSG00000059005, ENSMUSG00000004980, ENSMUSG00000016018, ENSMUSG00000002455,…	4.10397	3.55271e-12	13.4494
GOTERM_CC_5	GO:0005654~nucleoplasm	106	5.06515e-14	ENSMUSG00000055044, ENSMUSG00000031585, ENSMUSG00000029238, ENSMUSG00000021264, ENSMUSG00000020409, ENSMUSG00000048100, ENSMUSG00000072872, ENSMUSG00000025782, ENSMUSG00000022774, ENSMUSG00000038374, ENSMUSG00000028233, ENSMUSG00000009575, ENSMUSG00000070544, ENSMUSG00000037364, ENSMUSG00000020708, ENSMUSG00000031245, ENSMUSG00000078676, ENSMUSG00000024067, ENSMUSG00000007850, ENSMUSG00000006599,…	2.14415	7.04325e-11	12.1522
GOTERM_CC_5	GO:0043232~intracellular non-membrane-bounded organelle	248	5.52646e-14	ENSMUSG00000032504, ENSMUSG00000035954, ENSMUSG00000018707, ENSMUSG00000028907, ENSMUSG00000035575, ENSMUSG00000029684, ENSMUSG00000025209, ENSMUSG00000042699, ENSMUSG00000028309, ENSMUSG00000035199, ENSMUSG00000024789, ENSMUSG00000032264, ENSMUSG00000022114, ENSMUSG00000020900, ENSMUSG00000009575, ENSMUSG00000025889, ENSMUSG00000020601, ENSMUSG00000041570, ENSMUSG00000019969, ENSMUSG00000022391,…	1.56586	7.69163e-11	12.114
GOTERM_CC_5	GO:0016604~nuclear body	39	4.06637e-11	ENSMUSG00000029478, ENSMUSG00000028609, ENSMUSG00000024283, ENSMUSG00000029634, ENSMUSG00000031403, ENSMUSG00000008730, ENSMUSG00000018974, ENSMUSG00000022160, ENSMUSG00000028676, ENSMUSG00000039449, ENSMUSG00000059659, ENSMUSG00000027177, ENSMUSG00000024999, ENSMUSG00000023932, ENSMUSG00000015176, ENSMUSG00000021244, ENSMUSG00000034544, ENSMUSG00000015748, ENSMUSG00000028010, ENSMUSG00000020409,…	3.32777	5.65722e-08	9.2474
GOTERM_CC_5	GO:0044451~nucleoplasm part	82	7.74472e-09	ENSMUSG00000029478, ENSMUSG00000055044, ENSMUSG00000028609, ENSMUSG00000018474, ENSMUSG00000031403, ENSMUSG00000008730, ENSMUSG00000022160, ENSMUSG00000028676, ENSMUSG00000031585, ENSMUSG00000029238, ENSMUSG00000023932, ENSMUSG00000032402, ENSMUSG00000033237, ENSMUSG00000031609, ENSMUSG00000021264, ENSMUSG00000031353, ENSMUSG00000028010, ENSMUSG00000020409, ENSMUSG00000042133, ENSMUSG00000022538,…	1.93675	1.07746e-05	6.9676
GOTERM_CC_5	GO:0015630~microtubule cytoskeleton	69	6.70463e-07	ENSMUSG00000037234, ENSMUSG00000032504, ENSMUSG00000018707, ENSMUSG00000026430, ENSMUSG00000056919, ENSMUSG00000048799, ENSMUSG00000022604, ENSMUSG00000031347, ENSMUSG00000020483, ENSMUSG00000021870, ENSMUSG00000022443, ENSMUSG00000024290, ENSMUSG00000035770, ENSMUSG00000021068, ENSMUSG00000031865, ENSMUSG00000052397, ENSMUSG00000032264, ENSMUSG00000047193, ENSMUSG00000040407, ENSMUSG00000022678,…	1.85786	0.000932758	5.03023
GOTERM_CC_5	GO:0044432~endoplasmic reticulum part	42	2.14569e-06	ENSMUSG00000032649, ENSMUSG00000048482, ENSMUSG00000025240, ENSMUSG00000029767, ENSMUSG00000040170, ENSMUSG00000031545, ENSMUSG00000028343, ENSMUSG00000003814, ENSMUSG00000001467, ENSMUSG00000025823, ENSMUSG00000005615, ENSMUSG00000041220, ENSMUSG00000001143, ENSMUSG00000026864, ENSMUSG00000027828, ENSMUSG00000046378, ENSMUSG00000031668, ENSMUSG00000025198, ENSMUSG00000020458, ENSMUSG00000057069,…	2.203	0.00298508	4.52504
GOTERM_CC_5	GO:0005788~endoplasmic reticulum lumen	19	1.54347e-05	ENSMUSG00000018906, ENSMUSG00000048482, ENSMUSG00000032649, ENSMUSG00000029767, ENSMUSG00000028343, ENSMUSG00000003814, ENSMUSG00000070436, ENSMUSG00000025823, ENSMUSG00000025130, ENSMUSG00000004460, ENSMUSG00000026864, ENSMUSG00000043019, ENSMUSG00000026740, ENSMUSG00000020571, ENSMUSG00000019916, ENSMUSG00000020048, ENSMUSG00000027248, ENSMUSG00000022769, ENSMUSG00000032115	3.19741	0.021471	3.66815
GOTERM_CC_5	GO:0048770~pigment granule	20	4.91398e-05	ENSMUSG00000007739, ENSMUSG00000029767, ENSMUSG00000025809, ENSMUSG00000015656, ENSMUSG00000020849, ENSMUSG00000032504, ENSMUSG00000025823, ENSMUSG00000025130, ENSMUSG00000023944, ENSMUSG00000037720, ENSMUSG00000026864, ENSMUSG00000020368, ENSMUSG00000020571, ENSMUSG00000021270, ENSMUSG00000030062, ENSMUSG00000020048, ENSMUSG00000058799, ENSMUSG00000027248, ENSMUSG00000010095, ENSMUSG00000022285	2.85094	0.0683426	3.16531
GOTERM_CC_5	GO:0044430~cytoskeletal part	94	0.000126645	ENSMUSG00000007617, ENSMUSG00000037234, ENSMUSG00000032504, ENSMUSG00000018707, ENSMUSG00000026430, ENSMUSG00000022602, ENSMUSG00000056919, ENSMUSG00000031605, ENSMUSG00000048799, ENSMUSG00000022604, ENSMUSG00000020483, ENSMUSG00000031347, ENSMUSG00000019861, ENSMUSG00000021870, ENSMUSG00000028402, ENSMUSG00000022443, ENSMUSG00000024290, ENSMUSG00000035770, ENSMUSG00000021068, ENSMUSG00000031865,…	1.47151	0.176047	2.75437
GOTERM_CC_5	GO:0044444~cytoplasmic part	401	0.000159314	ENSMUSG00000032649, ENSMUSG00000019774, ENSMUSG00000024261, ENSMUSG00000039367, ENSMUSG00000032504, ENSMUSG00000025103, ENSMUSG00000022957, ENSMUSG00000027455, ENSMUSG00000046378, ENSMUSG00000026192, ENSMUSG00000025209, ENSMUSG00000021116, ENSMUSG00000035199, ENSMUSG00000027500, ENSMUSG00000024359, ENSMUSG00000020900, ENSMUSG00000025889, ENSMUSG00000020256, ENSMUSG00000019969, ENSMUSG00000022391,…	1.16126	0.221414	2.6548
GOTERM_CC_5	GO:0048471~perinuclear region of cytoplasm	32	0.000166201	ENSMUSG00000021681, ENSMUSG00000036769, ENSMUSG00000021149, ENSMUSG00000024261, ENSMUSG00000020074, ENSMUSG00000027695, ENSMUSG00000036371, ENSMUSG00000049892, ENSMUSG00000059981, ENSMUSG00000042605, ENSMUSG00000026754, ENSMUSG00000024528, ENSMUSG00000037992, ENSMUSG00000019996, ENSMUSG00000043241, ENSMUSG00000030805, ENSMUSG00000048787, ENSMUSG00000063273, ENSMUSG00000022892, ENSMUSG00000027500,…	2.05147	0.230975	2.63644
GOTERM_CC_5	GO:0005635~nuclear envelope	27	0.000307463	ENSMUSG00000003226, ENSMUSG00000062075, ENSMUSG00000020074, ENSMUSG00000030020, ENSMUSG00000021987, ENSMUSG00000020458, ENSMUSG00000027944, ENSMUSG00000027782, ENSMUSG00000000531, ENSMUSG00000016619, ENSMUSG00000060771, ENSMUSG00000009470, ENSMUSG00000034485, ENSMUSG00000006678, ENSMUSG00000026605, ENSMUSG00000026491, ENSMUSG00000010097, ENSMUSG00000063550, ENSMUSG00000006005, ENSMUSG00000026021,…	2.13821	0.426901	2.36967
GOTERM_CC_5	GO:0005783~endoplasmic reticulum	97	0.000524905	ENSMUSG00000032649, ENSMUSG00000027195, ENSMUSG00000056629, ENSMUSG00000025823, ENSMUSG00000001467, ENSMUSG00000028243, ENSMUSG00000046378, ENSMUSG00000025198, ENSMUSG00000030082, ENSMUSG00000020571, ENSMUSG00000032042, ENSMUSG00000030062, ENSMUSG00000035199, ENSMUSG00000032437, ENSMUSG00000032264, ENSMUSG00000048578, ENSMUSG00000032262, ENSMUSG00000028165, ENSMUSG00000026740, ENSMUSG00000019969,…	1.40251	0.72779	2.13799
GOTERM_CC_5	GO:0005874~microtubule	36	0.000658812	ENSMUSG00000022629, ENSMUSG00000019794, ENSMUSG00000032624, ENSMUSG00000037234, ENSMUSG00000018707, ENSMUSG00000049550, ENSMUSG00000020513, ENSMUSG00000019996, ENSMUSG00000052727, ENSMUSG00000026430, ENSMUSG00000021288, ENSMUSG00000019487, ENSMUSG00000021693, ENSMUSG00000020483, ENSMUSG00000070730, ENSMUSG00000027475, ENSMUSG00000035770, ENSMUSG00000021068, ENSMUSG00000028851, ENSMUSG00000031865,…	1.81747	0.912665	2.03969
GOTERM_CC_5	GO:0005815~microtubule organizing center	30	0.000819273	ENSMUSG00000019794, ENSMUSG00000062563, ENSMUSG00000032504, ENSMUSG00000024991, ENSMUSG00000038170, ENSMUSG00000020513, ENSMUSG00000022280, ENSMUSG00000041846, ENSMUSG00000056919, ENSMUSG00000048799, ENSMUSG00000022604, ENSMUSG00000021693, ENSMUSG00000031347, ENSMUSG00000021870, ENSMUSG00000032965, ENSMUSG00000024290, ENSMUSG00000021068, ENSMUSG00000052397, ENSMUSG00000040407, ENSMUSG00000022678,…	1.92325	1.13378	1.94547
GOTERM_CC_5	GO:0000785~chromatin	27	0.00100082	ENSMUSG00000004099, ENSMUSG00000005370, ENSMUSG00000048118, ENSMUSG00000018474, ENSMUSG00000079184, ENSMUSG00000016559, ENSMUSG00000024054, ENSMUSG00000040681, ENSMUSG00000056608, ENSMUSG00000031609, ENSMUSG00000005045, ENSMUSG00000060032, ENSMUSG00000032481, ENSMUSG00000039219, ENSMUSG00000030619, ENSMUSG00000020661, ENSMUSG00000002748, ENSMUSG00000062270, ENSMUSG00000063870, ENSMUSG00000018666,…	1.9827	1.3834	1.85905
GOTERM_CC_5	GO:0005813~centrosome	26	0.00140049	ENSMUSG00000019794, ENSMUSG00000032504, ENSMUSG00000024991, ENSMUSG00000038170, ENSMUSG00000020513, ENSMUSG00000022280, ENSMUSG00000041846, ENSMUSG00000056919, ENSMUSG00000048799, ENSMUSG00000022604, ENSMUSG00000031347, ENSMUSG00000021693, ENSMUSG00000021870, ENSMUSG00000024290, ENSMUSG00000021068, ENSMUSG00000040407, ENSMUSG00000022678, ENSMUSG00000027479, ENSMUSG00000033282, ENSMUSG00000026605,…	1.96893	1.93087	1.71425
GOTERM_CC_5	GO:0005856~cytoskeleton	121	0.00155261	ENSMUSG00000022451, ENSMUSG00000055044, ENSMUSG00000032504, ENSMUSG00000018707, ENSMUSG00000041773, ENSMUSG00000029684, ENSMUSG00000026430, ENSMUSG00000056919, ENSMUSG00000020483, ENSMUSG00000035199, ENSMUSG00000022443, ENSMUSG00000024789, ENSMUSG00000035770, ENSMUSG00000021068, ENSMUSG00000024456, ENSMUSG00000031865, ENSMUSG00000032264, ENSMUSG00000047193, ENSMUSG00000022114, ENSMUSG00000020900,…	1.30668	2.1385	1.66989
GOTERM_CC_5	GO:0005694~chromosome	49	0.00174546	ENSMUSG00000005370, ENSMUSG00000018474, ENSMUSG00000049327, ENSMUSG00000015697, ENSMUSG00000024054, ENSMUSG00000040681, ENSMUSG00000031609, ENSMUSG00000032481, ENSMUSG00000028309, ENSMUSG00000062270, ENSMUSG00000063870, ENSMUSG00000032264, ENSMUSG00000022678, ENSMUSG00000024513, ENSMUSG00000026605, ENSMUSG00000009575, ENSMUSG00000009630, ENSMUSG00000031758, ENSMUSG00000070544, ENSMUSG00000022391,…	1.57066	2.40114	1.61958
GOTERM_CC_5	GO:0005829~cytosol	66	0.00190055	ENSMUSG00000009828, ENSMUSG00000021037, ENSMUSG00000036769, ENSMUSG00000015656, ENSMUSG00000032504, ENSMUSG00000005615, ENSMUSG00000028243, ENSMUSG00000054766, ENSMUSG00000009293, ENSMUSG00000022789, ENSMUSG00000000416, ENSMUSG00000036932, ENSMUSG00000022601, ENSMUSG00000023067, ENSMUSG00000025290, ENSMUSG00000021870, ENSMUSG00000022443, ENSMUSG00000021638, ENSMUSG00000027184, ENSMUSG00000034485,…	1.45663	2.61189	1.58305
GOTERM_CC_5	GO:0016585~chromatin remodeling complex	12	0.00212975	ENSMUSG00000029478, ENSMUSG00000002748, ENSMUSG00000062270, ENSMUSG00000031060, ENSMUSG00000018474, ENSMUSG00000031609, ENSMUSG00000032481, ENSMUSG00000031715, ENSMUSG00000031353, ENSMUSG00000024513, ENSMUSG00000009575, ENSMUSG00000024921	2.90796	2.92255	1.53424
GOTERM_CC_5	GO:0014069~postsynaptic density	12	0.002517	ENSMUSG00000019861, ENSMUSG00000030465, ENSMUSG00000054693, ENSMUSG00000028402, ENSMUSG00000007617, ENSMUSG00000043079, ENSMUSG00000055254, ENSMUSG00000022602, ENSMUSG00000026024, ENSMUSG00000025813, ENSMUSG00000024083, ENSMUSG00000024241	2.85094	3.44537	1.46276
GOTERM_CC_5	GO:0030684~preribosome	6	0.00277318	ENSMUSG00000033285, ENSMUSG00000079470, ENSMUSG00000058392, ENSMUSG00000028907, ENSMUSG00000026019, ENSMUSG00000061032	5.59223	3.78979	1.42139
GOTERM_CC_5	GO:0016023~cytoplasmic membrane-bounded vesicle	51	0.00399977	ENSMUSG00000040276, ENSMUSG00000048482, ENSMUSG00000024261, ENSMUSG00000015656, ENSMUSG00000039367, ENSMUSG00000020530, ENSMUSG00000020849, ENSMUSG00000032504, ENSMUSG00000025823, ENSMUSG00000037720, ENSMUSG00000056429, ENSMUSG00000022957, ENSMUSG00000020571, ENSMUSG00000000416, ENSMUSG00000022602, ENSMUSG00000030062, ENSMUSG00000019861, ENSMUSG00000025582, ENSMUSG00000006169, ENSMUSG00000054693,…	1.49261	5.42313	1.26575
GOTERM_CC_5	GO:0005802~trans-Golgi network	11	0.00432317	ENSMUSG00000056429, ENSMUSG00000030805, ENSMUSG00000026754, ENSMUSG00000040276, ENSMUSG00000032570, ENSMUSG00000021686, ENSMUSG00000033792, ENSMUSG00000024480, ENSMUSG00000030872, ENSMUSG00000004771, ENSMUSG00000026605	2.83578	5.84947	1.23288
GOTERM_CC_5	GO:0034399~nuclear periphery	11	0.00590566	ENSMUSG00000020661, ENSMUSG00000029290, ENSMUSG00000042133, ENSMUSG00000062075, ENSMUSG00000028820, ENSMUSG00000032249, ENSMUSG00000021264, ENSMUSG00000006678, ENSMUSG00000024974, ENSMUSG00000026491, ENSMUSG00000026605	2.72003	7.91005	1.10182
GOTERM_CC_5	GO:0042175~nuclear envelope-endoplasmic reticulum network	24	0.00615573	ENSMUSG00000025240, ENSMUSG00000022136, ENSMUSG00000040170, ENSMUSG00000032437, ENSMUSG00000031545, ENSMUSG00000028343, ENSMUSG00000005615, ENSMUSG00000001467, ENSMUSG00000021670, ENSMUSG00000041220, ENSMUSG00000001143, ENSMUSG00000056050, ENSMUSG00000027828, ENSMUSG00000046378, ENSMUSG00000031668, ENSMUSG00000027422, ENSMUSG00000025198, ENSMUSG00000057069, ENSMUSG00000019969, ENSMUSG00000020458,…	1.81747	8.23182	1.0845
GOTERM_CC_5	GO:0016363~nuclear matrix	10	0.00633407	ENSMUSG00000020661, ENSMUSG00000029290, ENSMUSG00000042133, ENSMUSG00000028820, ENSMUSG00000032249, ENSMUSG00000021264, ENSMUSG00000006678, ENSMUSG00000024974, ENSMUSG00000026491, ENSMUSG00000026605	2.88488	8.46065	1.0726
GOTERM_CC_5	GO:0035253~ciliary rootlet	5	0.00644589	ENSMUSG00000006740, ENSMUSG00000022892, ENSMUSG00000026764, ENSMUSG00000019969, ENSMUSG00000021288	6.05825	8.60385	1.06531
GOTERM_CC_5	GO:0005789~endoplasmic reticulum membrane	23	0.00671351	ENSMUSG00000025240, ENSMUSG00000022136, ENSMUSG00000040170, ENSMUSG00000032437, ENSMUSG00000031545, ENSMUSG00000028343, ENSMUSG00000005615, ENSMUSG00000001467, ENSMUSG00000021670, ENSMUSG00000041220, ENSMUSG00000001143, ENSMUSG00000056050, ENSMUSG00000027828, ENSMUSG00000046378, ENSMUSG00000031668, ENSMUSG00000027422, ENSMUSG00000025198, ENSMUSG00000057069, ENSMUSG00000020458, ENSMUSG00000057329,…	1.83342	8.94575	1.04838
GOTERM_CC_5	GO:0031410~cytoplasmic vesicle	59	0.00691633	ENSMUSG00000040276, ENSMUSG00000048482, ENSMUSG00000024261, ENSMUSG00000015656, ENSMUSG00000039367, ENSMUSG00000020530, ENSMUSG00000020849, ENSMUSG00000032504, ENSMUSG00000025823, ENSMUSG00000037720, ENSMUSG00000056429, ENSMUSG00000022957, ENSMUSG00000020571, ENSMUSG00000000416, ENSMUSG00000022602, ENSMUSG00000030062, ENSMUSG00000025582, ENSMUSG00000019861, ENSMUSG00000024294, ENSMUSG00000006169,…	1.40723	9.20407	1.03602
GOTERM_CC_5	GO:0005819~spindle	18	0.00776559	ENSMUSG00000019794, ENSMUSG00000022892, ENSMUSG00000022443, ENSMUSG00000032264, ENSMUSG00000031536, ENSMUSG00000022678, ENSMUSG00000027479, ENSMUSG00000079480, ENSMUSG00000026605, ENSMUSG00000020900, ENSMUSG00000053436, ENSMUSG00000009630, ENSMUSG00000021959, ENSMUSG00000020580, ENSMUSG00000056919, ENSMUSG00000026064, ENSMUSG00000024974, ENSMUSG00000024068	2.00089	10.2784
GOTERM_CC_5	GO:0000792~heterochromatin	11	0.00790637	ENSMUSG00000004099, ENSMUSG00000024054, ENSMUSG00000020661, ENSMUSG00000002748, ENSMUSG00000032481, ENSMUSG00000018666, ENSMUSG00000016559, ENSMUSG00000030619, ENSMUSG00000024513, ENSMUSG00000009575, ENSMUSG00000031229	2.61336	10.4553
GOTERM_CC_5	GO:0000922~spindle pole	7	0.00923076	ENSMUSG00000053436, ENSMUSG00000021959, ENSMUSG00000020580, ENSMUSG00000032264, ENSMUSG00000022678, ENSMUSG00000024974, ENSMUSG00000026605	3.68763	12.1041
GOTERM_CC_5	GO:0044452~nucleolar part	7	0.00923076	ENSMUSG00000060152, ENSMUSG00000047649, ENSMUSG00000027395, ENSMUSG00000026019, ENSMUSG00000046865, ENSMUSG00000028010, ENSMUSG00000036160	3.68763	12.1041
GOTERM_CC_5	GO:0009898~internal side of plasma membrane	36	0.012507	ENSMUSG00000031442, ENSMUSG00000021686, ENSMUSG00000009073, ENSMUSG00000050029, ENSMUSG00000038485, ENSMUSG00000027695, ENSMUSG00000034209, ENSMUSG00000049892, ENSMUSG00000004768, ENSMUSG00000055319, ENSMUSG00000008859, ENSMUSG00000020315, ENSMUSG00000045671, ENSMUSG00000030350, ENSMUSG00000024480, ENSMUSG00000028945, ENSMUSG00000027002, ENSMUSG00000030516, ENSMUSG00000021062, ENSMUSG00000027540,…	1.51984	16.0624
GOTERM_CC_5	GO:0044427~chromosomal part	39	0.0130378	ENSMUSG00000004099, ENSMUSG00000005370, ENSMUSG00000048118, ENSMUSG00000018474, ENSMUSG00000079184, ENSMUSG00000041133, ENSMUSG00000016559, ENSMUSG00000040681, ENSMUSG00000024054, ENSMUSG00000056608, ENSMUSG00000031609, ENSMUSG00000005045, ENSMUSG00000060032, ENSMUSG00000032481, ENSMUSG00000039219, ENSMUSG00000030619, ENSMUSG00000020661, ENSMUSG00000002748, ENSMUSG00000057469, ENSMUSG00000062270,…	1.48599	16.688
GOTERM_MF_5	GO:0032559~adenyl ribonucleotide binding	182	2.01453e-16	ENSMUSG00000032307, ENSMUSG00000009828, ENSMUSG00000025060, ENSMUSG00000053289, ENSMUSG00000015656, ENSMUSG00000020075, ENSMUSG00000053907, ENSMUSG00000020076, ENSMUSG00000031715, ENSMUSG00000018707, ENSMUSG00000034761, ENSMUSG00000021457, ENSMUSG00000032501, ENSMUSG00000024054, ENSMUSG00000073563, ENSMUSG00000001674, ENSMUSG00000025613, ENSMUSG00000034931, ENSMUSG00000058006, ENSMUSG00000025209,…	1.79472	2.77556e-13	14.5566
GOTERM_MF_5	GO:0046914~transition metal ion binding	259	1.96638e-11	ENSMUSG00000063281, ENSMUSG00000039367, ENSMUSG00000053286, ENSMUSG00000050714, ENSMUSG00000038418, ENSMUSG00000021514, ENSMUSG00000061911, ENSMUSG00000042599, ENSMUSG00000021264, ENSMUSG00000028902, ENSMUSG00000020409, ENSMUSG00000046185, ENSMUSG00000028309, ENSMUSG00000025782, ENSMUSG00000072872, ENSMUSG00000033623, ENSMUSG00000027104, ENSMUSG00000021277, ENSMUSG00000033760, ENSMUSG00000048234,…	1.42978	2.48241e-08	9.60513
GOTERM_MF_5	GO:0016462~pyrophosphatase activity	78	9.51834e-07	ENSMUSG00000027722, ENSMUSG00000060671, ENSMUSG00000053289, ENSMUSG00000015656, ENSMUSG00000020075, ENSMUSG00000031715, ENSMUSG00000018707, ENSMUSG00000020076, ENSMUSG00000024921, ENSMUSG00000040481, ENSMUSG00000037993, ENSMUSG00000001674, ENSMUSG00000034931, ENSMUSG00000022789, ENSMUSG00000016018, ENSMUSG00000058006, ENSMUSG00000032042, ENSMUSG00000025209, ENSMUSG00000040584, ENSMUSG00000042699,…	1.75466	0.00120161	4.92024
GOTERM_MF_5	GO:0008757~S-adenosylmethionine-dependent methyltransferase activity	17	5.15434e-05	ENSMUSG00000002028, ENSMUSG00000020661, ENSMUSG00000004099, ENSMUSG00000038279, ENSMUSG00000049327, ENSMUSG00000021488, ENSMUSG00000015697, ENSMUSG00000057406, ENSMUSG00000021311, ENSMUSG00000021638, ENSMUSG00000022160, ENSMUSG00000053286, ENSMUSG00000037111, ENSMUSG00000054823, ENSMUSG00000038056, ENSMUSG00000021595, ENSMUSG00000030350	3.22042	0.0650503	3.18675
GOTERM_MF_5	GO:0004672~protein kinase activity	65	0.00013998	ENSMUSG00000009828, ENSMUSG00000022451, ENSMUSG00000020032, ENSMUSG00000025060, ENSMUSG00000018209, ENSMUSG00000008730, ENSMUSG00000034761, ENSMUSG00000021457, ENSMUSG00000032501, ENSMUSG00000073563, ENSMUSG00000028289, ENSMUSG00000004865, ENSMUSG00000024014, ENSMUSG00000032547, ENSMUSG00000000416, ENSMUSG00000029648, ENSMUSG00000017291, ENSMUSG00000038145, ENSMUSG00000022263, ENSMUSG00000028944,…	1.60517	0.176571	2.75308
GOTERM_MF_5	GO:0003756~protein disulfide isomerase activity	5	0.00128186	ENSMUSG00000020571, ENSMUSG00000028343, ENSMUSG00000025823, ENSMUSG00000027248, ENSMUSG00000025130	8.99824	1.60625	1.79419
GOTERM_MF_5	GO:0005088~Ras guanyl-nucleotide exchange factor activity	15	0.00157501	ENSMUSG00000028896, ENSMUSG00000031442, ENSMUSG00000009681, ENSMUSG00000031511, ENSMUSG00000020021, ENSMUSG00000020640, ENSMUSG00000062232, ENSMUSG00000024241, ENSMUSG00000034801, ENSMUSG00000040687, ENSMUSG00000022957, ENSMUSG00000048960, ENSMUSG00000026024, ENSMUSG00000022263, ENSMUSG00000021895	2.6019	1.97023	1.70548
GOTERM_MF_5	GO:0008170~N-methyltransferase activity	10	0.00277541	ENSMUSG00000002028, ENSMUSG00000054823, ENSMUSG00000049327, ENSMUSG00000021488, ENSMUSG00000057406, ENSMUSG00000015697, ENSMUSG00000038056, ENSMUSG00000053286, ENSMUSG00000030350, ENSMUSG00000037111	3.27209	3.44778	1.46246
GOTERM_MF_5	GO:0008276~protein methyltransferase activity	10	0.00326054	ENSMUSG00000002028, ENSMUSG00000054823, ENSMUSG00000049327, ENSMUSG00000021488, ENSMUSG00000057406, ENSMUSG00000015697, ENSMUSG00000038056, ENSMUSG00000030350, ENSMUSG00000030619, ENSMUSG00000037111	3.19937	4.03908	1.39372
GOTERM_MF_5	GO:0019787~small conjugating protein ligase activity	18	0.00562172	ENSMUSG00000032307, ENSMUSG00000005371, ENSMUSG00000024294, ENSMUSG00000035247, ENSMUSG00000029634, ENSMUSG00000030451, ENSMUSG00000020184, ENSMUSG00000022663, ENSMUSG00000009293, ENSMUSG00000030779, ENSMUSG00000026021, ENSMUSG00000029203, ENSMUSG00000024817, ENSMUSG00000020659, ENSMUSG00000014668, ENSMUSG00000025326, ENSMUSG00000034403, ENSMUSG00000039159	2.07319	6.86968	1.16306
GOTERM_MF_5	GO:0032561~guanyl ribonucleotide binding	39	0.00687963	ENSMUSG00000023353, ENSMUSG00000052681, ENSMUSG00000021149, ENSMUSG00000030357, ENSMUSG00000050029, ENSMUSG00000034209, ENSMUSG00000017144, ENSMUSG00000025733, ENSMUSG00000073639, ENSMUSG00000025422, ENSMUSG00000049892, ENSMUSG00000020513, ENSMUSG00000004768, ENSMUSG00000017418, ENSMUSG00000022789, ENSMUSG00000032042, ENSMUSG00000008859, ENSMUSG00000070284, ENSMUSG00000028945, ENSMUSG00000059811,…	1.5468	8.34608	1.07852
GOTERM_MF_5	GO:0016791~phosphatase activity	28	0.0077072	ENSMUSG00000027531, ENSMUSG00000026617, ENSMUSG00000025240, ENSMUSG00000026773, ENSMUSG00000026309, ENSMUSG00000032290, ENSMUSG00000024052, ENSMUSG00000021987, ENSMUSG00000019907, ENSMUSG00000037926, ENSMUSG00000027540, ENSMUSG00000046062, ENSMUSG00000018648, ENSMUSG00000029147, ENSMUSG00000027088, ENSMUSG00000009630, ENSMUSG00000031530, ENSMUSG00000028274, ENSMUSG00000014956, ENSMUSG00000028771,…	1.69379	9.3056	1.03126
GOTERM_MF_5	GO:0035257~nuclear hormone receptor binding	8	0.0077513	ENSMUSG00000027678, ENSMUSG00000030357, ENSMUSG00000021488, ENSMUSG00000002455, ENSMUSG00000002250, ENSMUSG00000018501, ENSMUSG00000018965, ENSMUSG00000018160	3.38757	9.35647	1.02889
GOTERM_MF_5	GO:0003714~transcription corepressor activity	12	0.0102804	ENSMUSG00000029478, ENSMUSG00000030232, ENSMUSG00000027177, ENSMUSG00000033565, ENSMUSG00000040363, ENSMUSG00000051495, ENSMUSG00000028282, ENSMUSG00000072872, ENSMUSG00000040761, ENSMUSG00000021488, ENSMUSG00000008730, ENSMUSG00000018501	2.39953	12.2303
PANTHER_BP_ALL	BP00031:Nucleoside, nucleotide and nucleic acid metabolism	343	3.52217e-18	ENSMUSG00000018199, ENSMUSG00000063281, ENSMUSG00000053289, ENSMUSG00000034575, ENSMUSG00000063632, ENSMUSG00000053286, ENSMUSG00000018501, ENSMUSG00000050714, ENSMUSG00000038418, ENSMUSG00000028907, ENSMUSG00000073563, ENSMUSG00000021514, ENSMUSG00000061911, ENSMUSG00000040824, ENSMUSG00000035575, ENSMUSG00000001674, ENSMUSG00000021264, ENSMUSG00000026192, ENSMUSG00000028902, ENSMUSG00000025209,…	1.51006	4.40375e-15	16.3562
PANTHER_BP_ALL	BP00062:Protein folding	45	2.40065e-16	ENSMUSG00000049792, ENSMUSG00000021037, ENSMUSG00000028035, ENSMUSG00000030357, ENSMUSG00000030007, ENSMUSG00000036052, ENSMUSG00000015656, ENSMUSG00000003814, ENSMUSG00000056629, ENSMUSG00000059659, ENSMUSG00000026864, ENSMUSG00000028410, ENSMUSG00000020288, ENSMUSG00000025613, ENSMUSG00000025757, ENSMUSG00000057069, ENSMUSG00000024222, ENSMUSG00000027274, ENSMUSG00000027804, ENSMUSG00000025980,…	4.13762	2.77556e-13	14.5566
PANTHER_BP_ALL	BP00047:Pre-mRNA processing	55	1.40929e-11	ENSMUSG00000029817, ENSMUSG00000060373, ENSMUSG00000028676, ENSMUSG00000022160, ENSMUSG00000037993, ENSMUSG00000031822, ENSMUSG00000040824, ENSMUSG00000034931, ENSMUSG00000059208, ENSMUSG00000045427, ENSMUSG00000059005, ENSMUSG00000044068, ENSMUSG00000002455, ENSMUSG00000028902, ENSMUSG00000033732, ENSMUSG00000038611, ENSMUSG00000042699, ENSMUSG00000020409, ENSMUSG00000020180, ENSMUSG00000029169,…	2.74157	1.76202e-08	9.75399
PANTHER_BP_ALL	BP00048:mRNA splicing	41	4.57457e-09	ENSMUSG00000029817, ENSMUSG00000052137, ENSMUSG00000028034, ENSMUSG00000060373, ENSMUSG00000046667, ENSMUSG00000028676, ENSMUSG00000038774, ENSMUSG00000039449, ENSMUSG00000032423, ENSMUSG00000037993, ENSMUSG00000031822, ENSMUSG00000020358, ENSMUSG00000042426, ENSMUSG00000028820, ENSMUSG00000045427, ENSMUSG00000034931, ENSMUSG00000044068, ENSMUSG00000059005, ENSMUSG00000004980, ENSMUSG00000002455,…	2.78967	5.71955e-06	7.24264
PANTHER_BP_ALL	BP00060:Protein metabolism and modification	278	9.65049e-07	ENSMUSG00000018199, ENSMUSG00000024360, ENSMUSG00000026254, ENSMUSG00000019774, ENSMUSG00000032501, ENSMUSG00000073563, ENSMUSG00000042599, ENSMUSG00000046378, ENSMUSG00000025613, ENSMUSG00000020124, ENSMUSG00000021116, ENSMUSG00000024789, ENSMUSG00000042719, ENSMUSG00000024359, ENSMUSG00000041180, ENSMUSG00000052833, ENSMUSG00000033364, ENSMUSG00000051590, ENSMUSG00000020601, ENSMUSG00000026740,…	1.29247	0.00120659	4.91844
PANTHER_BP_ALL	BP00273:Chromatin packaging and remodeling	32	2.28301e-06	ENSMUSG00000037935, ENSMUSG00000002028, ENSMUSG00000049516, ENSMUSG00000029920, ENSMUSG00000022141, ENSMUSG00000029279, ENSMUSG00000026918, ENSMUSG00000049327, ENSMUSG00000021488, ENSMUSG00000015697, ENSMUSG00000057406, ENSMUSG00000016559, ENSMUSG00000054766, ENSMUSG00000040481, ENSMUSG00000071054, ENSMUSG00000002052, ENSMUSG00000060032, ENSMUSG00000035021, ENSMUSG00000058799, ENSMUSG00000031353,…	2.54656	0.00285439	4.54449
PANTHER_BP_ALL	BP00203:Cell cycle	94	0.000175037	ENSMUSG00000030357, ENSMUSG00000031403, ENSMUSG00000020849, ENSMUSG00000034575, ENSMUSG00000018707, ENSMUSG00000005610, ENSMUSG00000004364, ENSMUSG00000054766, ENSMUSG00000040681, ENSMUSG00000073563, ENSMUSG00000027455, ENSMUSG00000023932, ENSMUSG00000025209, ENSMUSG00000023067, ENSMUSG00000024222, ENSMUSG00000030983, ENSMUSG00000031347, ENSMUSG00000036990, ENSMUSG00000024293, ENSMUSG00000060771,…	1.45857	0.218628	2.66029
PANTHER_BP_ALL	BP00125:Intracellular protein traffic	95	0.000279623	ENSMUSG00000053841, ENSMUSG00000030738, ENSMUSG00000041670, ENSMUSG00000024261, ENSMUSG00000037234, ENSMUSG00000039367, ENSMUSG00000018707, ENSMUSG00000035954, ENSMUSG00000032290, ENSMUSG00000073563, ENSMUSG00000025340, ENSMUSG00000056429, ENSMUSG00000004768, ENSMUSG00000022957, ENSMUSG00000027828, ENSMUSG00000030082, ENSMUSG00000017418, ENSMUSG00000022789, ENSMUSG00000034243, ENSMUSG00000021124,…	1.43642	0.34905	2.45711
PANTHER_BP_ALL	BP00072:Protein complex assembly	14	0.000336226	ENSMUSG00000007739, ENSMUSG00000030007, ENSMUSG00000015656, ENSMUSG00000026696, ENSMUSG00000024359, ENSMUSG00000026864, ENSMUSG00000025613, ENSMUSG00000031578, ENSMUSG00000022437, ENSMUSG00000001416, ENSMUSG00000027274, ENSMUSG00000025980, ENSMUSG00000018160, ENSMUSG00000003848	3.17524	0.419569	2.3772
PANTHER_BP_ALL	BP00064:Protein phosphorylation	73	0.00037436	ENSMUSG00000009828, ENSMUSG00000020032, ENSMUSG00000040276, ENSMUSG00000025060, ENSMUSG00000018209, ENSMUSG00000032601, ENSMUSG00000008730, ENSMUSG00000034761, ENSMUSG00000021457, ENSMUSG00000019254, ENSMUSG00000032290, ENSMUSG00000032501, ENSMUSG00000073563, ENSMUSG00000028289, ENSMUSG00000004865, ENSMUSG00000032547, ENSMUSG00000029648, ENSMUSG00000017291, ENSMUSG00000038145, ENSMUSG00000028944,…	1.51202	0.467054	2.33063
PANTHER_BP_ALL	BP00040:mRNA transcription	168	0.000875268	ENSMUSG00000071341, ENSMUSG00000040761, ENSMUSG00000063281, ENSMUSG00000063632, ENSMUSG00000031715, ENSMUSG00000050714, ENSMUSG00000018501, ENSMUSG00000039634, ENSMUSG00000038418, ENSMUSG00000031585, ENSMUSG00000021514, ENSMUSG00000061911, ENSMUSG00000037868, ENSMUSG00000029238, ENSMUSG00000026436, ENSMUSG00000035575, ENSMUSG00000008976, ENSMUSG00000021264, ENSMUSG00000051510, ENSMUSG00000048100,…	1.26099	1.08885	1.96303
PANTHER_BP_ALL	BP00063:Protein modification	112	0.00100464	ENSMUSG00000032307, ENSMUSG00000009828, ENSMUSG00000025060, ENSMUSG00000025823, ENSMUSG00000034761, ENSMUSG00000019254, ENSMUSG00000021457, ENSMUSG00000032501, ENSMUSG00000073563, ENSMUSG00000046378, ENSMUSG00000020571, ENSMUSG00000030062, ENSMUSG00000024789, ENSMUSG00000042719, ENSMUSG00000033316, ENSMUSG00000018648, ENSMUSG00000052833, ENSMUSG00000024811, ENSMUSG00000020601, ENSMUSG00000051590,…	1.34047	1.24886	1.90348
PANTHER_BP_ALL	BP00178:Stress response	28	0.00122041	ENSMUSG00000009828, ENSMUSG00000021037, ENSMUSG00000024966, ENSMUSG00000015656, ENSMUSG00000028341, ENSMUSG00000028410, ENSMUSG00000026864, ENSMUSG00000020288, ENSMUSG00000023951, ENSMUSG00000031668, ENSMUSG00000038615, ENSMUSG00000031068, ENSMUSG00000056501, ENSMUSG00000028944, ENSMUSG00000032115, ENSMUSG00000025582, ENSMUSG00000031701, ENSMUSG00000026496, ENSMUSG00000053004, ENSMUSG00000024359,…	1.93415	1.51521	1.81953
PANTHER_BP_ALL	BP00136:Other intracellular protein traffic	12	0.00442627	ENSMUSG00000025340, ENSMUSG00000022663, ENSMUSG00000001150, ENSMUSG00000027828, ENSMUSG00000001768, ENSMUSG00000022892, ENSMUSG00000032536, ENSMUSG00000027475, ENSMUSG00000037234, ENSMUSG00000026028, ENSMUSG00000030872, ENSMUSG00000023805	2.67701	5.39541	1.26798
PANTHER_BP_ALL	BP00137:Protein targeting and localization	25	0.00636035	ENSMUSG00000053825, ENSMUSG00000027534, ENSMUSG00000022629, ENSMUSG00000019794, ENSMUSG00000020849, ENSMUSG00000038170, ENSMUSG00000009549, ENSMUSG00000001143, ENSMUSG00000049550, ENSMUSG00000051391, ENSMUSG00000032042, ENSMUSG00000027782, ENSMUSG00000022285, ENSMUSG00000020780, ENSMUSG00000030805, ENSMUSG00000032965, ENSMUSG00000028402, ENSMUSG00000040407, ENSMUSG00000009470, ENSMUSG00000018965,…	1.79055	7.66778	1.11533
PANTHER_BP_ALL	BP00133:Nuclear transport	14	0.00720296	ENSMUSG00000042133, ENSMUSG00000015757, ENSMUSG00000030738, ENSMUSG00000016619, ENSMUSG00000021374, ENSMUSG00000009470, ENSMUSG00000059659, ENSMUSG00000052833, ENSMUSG00000063550, ENSMUSG00000006005, ENSMUSG00000038546, ENSMUSG00000066232, ENSMUSG00000027782, ENSMUSG00000027804	2.29535	8.64198	1.06339
PANTHER_BP_ALL	BP00055:rRNA metabolism	12	0.00911343	ENSMUSG00000022247, ENSMUSG00000026234, ENSMUSG00000038279, ENSMUSG00000050244, ENSMUSG00000030521, ENSMUSG00000031403, ENSMUSG00000025047, ENSMUSG00000020706, ENSMUSG00000021595, ENSMUSG00000046865, ENSMUSG00000026127, ENSMUSG00000028010	2.43728	10.8159
PANTHER_BP_ALL	BP00114:MAPKKK cascade	23	0.0133973	ENSMUSG00000009828, ENSMUSG00000052681, ENSMUSG00000021224, ENSMUSG00000030265, ENSMUSG00000050029, ENSMUSG00000036894, ENSMUSG00000030733, ENSMUSG00000022114, ENSMUSG00000018648, ENSMUSG00000026309, ENSMUSG00000062232, ENSMUSG00000029147, ENSMUSG00000031530, ENSMUSG00000027104, ENSMUSG00000053436, ENSMUSG00000024793, ENSMUSG00000023951, ENSMUSG00000020601, ENSMUSG00000038894, ENSMUSG00000033618,…	1.72921	15.5185
PANTHER_BP_ALL	BP00224:Cell proliferation and differentiation	83	0.014588	ENSMUSG00000009828, ENSMUSG00000071341, ENSMUSG00000063281, ENSMUSG00000032504, ENSMUSG00000037235, ENSMUSG00000039634, ENSMUSG00000018707, ENSMUSG00000021457, ENSMUSG00000000489, ENSMUSG00000073563, ENSMUSG00000009293, ENSMUSG00000028289, ENSMUSG00000051375, ENSMUSG00000047904, ENSMUSG00000029648, ENSMUSG00000023067, ENSMUSG00000041324, ENSMUSG00000051510, ENSMUSG00000032487, ENSMUSG00000028945,…	1.28204	16.7844
PANTHER_BP_ALL	BP00073:Translational regulation	13	0.0176494	ENSMUSG00000026740, ENSMUSG00000031668, ENSMUSG00000030738, ENSMUSG00000028034, ENSMUSG00000049658, ENSMUSG00000039536, ENSMUSG00000056076, ENSMUSG00000063888, ENSMUSG00000024991, ENSMUSG00000029145, ENSMUSG00000045983, ENSMUSG00000005610, ENSMUSG00000022323	2.1314	19.9597
PANTHER_BP_ALL	BP00108:Receptor protein tyrosine kinase signaling pathway	24	0.0213133	ENSMUSG00000027540, ENSMUSG00000048482, ENSMUSG00000024789, ENSMUSG00000031217, ENSMUSG00000001300, ENSMUSG00000059923, ENSMUSG00000022114, ENSMUSG00000000489, ENSMUSG00000024241, ENSMUSG00000034801, ENSMUSG00000005533, ENSMUSG00000022372, ENSMUSG00000021974, ENSMUSG00000023951, ENSMUSG00000006005, ENSMUSG00000028289, ENSMUSG00000032547, ENSMUSG00000014361, ENSMUSG00000024539, ENSMUSG00000055254,…	1.63298	23.6131
PANTHER_MF_ALL	MF00042:Nucleic acid binding	321	1.25825e-23	ENSMUSG00000018199, ENSMUSG00000024360, ENSMUSG00000026254, ENSMUSG00000019774, ENSMUSG00000053289, ENSMUSG00000034575, ENSMUSG00000063632, ENSMUSG00000053286, ENSMUSG00000018501, ENSMUSG00000038418, ENSMUSG00000028907, ENSMUSG00000025103, ENSMUSG00000040824, ENSMUSG00000035575, ENSMUSG00000001674, ENSMUSG00000028902, ENSMUSG00000025209, ENSMUSG00000042699, ENSMUSG00000020409, ENSMUSG00000021116,…	1.6691	1.58093e-20	21.8011
PANTHER_MF_ALL	MF00077:Chaperone	49	1.03397e-17	ENSMUSG00000049792, ENSMUSG00000021037, ENSMUSG00000028035, ENSMUSG00000030357, ENSMUSG00000030007, ENSMUSG00000036052, ENSMUSG00000020849, ENSMUSG00000015656, ENSMUSG00000073676, ENSMUSG00000026864, ENSMUSG00000028410, ENSMUSG00000020288, ENSMUSG00000019802, ENSMUSG00000025613, ENSMUSG00000025757, ENSMUSG00000051391, ENSMUSG00000058006, ENSMUSG00000027274, ENSMUSG00000024222, ENSMUSG00000032115,…	4.13196	1.29913e-14	15.8863
PANTHER_MF_ALL	MF00053:Other RNA-binding protein	41	1.58489e-08	ENSMUSG00000024587, ENSMUSG00000018199, ENSMUSG00000033565, ENSMUSG00000037253, ENSMUSG00000040761, ENSMUSG00000032580, ENSMUSG00000028034, ENSMUSG00000039536, ENSMUSG00000036371, ENSMUSG00000009549, ENSMUSG00000039763, ENSMUSG00000042605, ENSMUSG00000022283, ENSMUSG00000031822, ENSMUSG00000071054, ENSMUSG00000031060, ENSMUSG00000070697, ENSMUSG00000052253, ENSMUSG00000032042, ENSMUSG00000071659,…	2.67612	1.99134e-05	6.70085
PANTHER_MF_ALL	MF00051:Helicase	32	1.20445e-07	ENSMUSG00000029920, ENSMUSG00000018474, ENSMUSG00000055065, ENSMUSG00000040565, ENSMUSG00000053289, ENSMUSG00000033658, ENSMUSG00000020721, ENSMUSG00000020075, ENSMUSG00000020076, ENSMUSG00000031715, ENSMUSG00000038774, ENSMUSG00000024921, ENSMUSG00000037993, ENSMUSG00000042426, ENSMUSG00000001674, ENSMUSG00000034931, ENSMUSG00000056608, ENSMUSG00000005045, ENSMUSG00000016018, ENSMUSG00000025209,…	2.8963	0.000151333	5.82007
PANTHER_MF_ALL	MF00065:mRNA processing factor	29	1.66601e-07	ENSMUSG00000029817, ENSMUSG00000060373, ENSMUSG00000039652, ENSMUSG00000028676, ENSMUSG00000038774, ENSMUSG00000039449, ENSMUSG00000032423, ENSMUSG00000040824, ENSMUSG00000028820, ENSMUSG00000002455, ENSMUSG00000028902, ENSMUSG00000041328, ENSMUSG00000071172, ENSMUSG00000033732, ENSMUSG00000020594, ENSMUSG00000015748, ENSMUSG00000020409, ENSMUSG00000020180, ENSMUSG00000029345, ENSMUSG00000046201,…	3.05207	0.000209325	5.67918
PANTHER_MF_ALL	MF00079:Other chaperones	23	1.7013e-07	ENSMUSG00000021037, ENSMUSG00000028035, ENSMUSG00000030357, ENSMUSG00000036052, ENSMUSG00000020849, ENSMUSG00000031701, ENSMUSG00000032285, ENSMUSG00000018965, ENSMUSG00000005483, ENSMUSG00000004460, ENSMUSG00000028410, ENSMUSG00000029014, ENSMUSG00000025889, ENSMUSG00000014195, ENSMUSG00000020288, ENSMUSG00000026740, ENSMUSG00000024780, ENSMUSG00000019802, ENSMUSG00000019471, ENSMUSG00000051391,…	3.6309	0.00021376	5.67007
PANTHER_MF_ALL	MF00070:Chromatin/chromatin-binding protein	27	9.25252e-07	ENSMUSG00000037935, ENSMUSG00000049516, ENSMUSG00000022141, ENSMUSG00000029279, ENSMUSG00000026918, ENSMUSG00000035623, ENSMUSG00000041133, ENSMUSG00000040681, ENSMUSG00000071054, ENSMUSG00000031609, ENSMUSG00000002052, ENSMUSG00000032481, ENSMUSG00000022185, ENSMUSG00000028896, ENSMUSG00000020923, ENSMUSG00000062270, ENSMUSG00000018666, ENSMUSG00000006527, ENSMUSG00000009575, ENSMUSG00000029670,…	2.95616	0.00116253	4.9346
PANTHER_MF_ALL	MF00071:Translation factor	22	1.16025e-05	ENSMUSG00000021116, ENSMUSG00000025967, ENSMUSG00000030738, ENSMUSG00000024360, ENSMUSG00000026254, ENSMUSG00000019774, ENSMUSG00000042500, ENSMUSG00000024991, ENSMUSG00000028842, ENSMUSG00000029145, ENSMUSG00000062203, ENSMUSG00000074656, ENSMUSG00000045983, ENSMUSG00000005610, ENSMUSG00000057561, ENSMUSG00000049658, ENSMUSG00000056076, ENSMUSG00000027236, ENSMUSG00000026083, ENSMUSG00000020594,…	2.95724	0.0145771	3.83633
PANTHER_MF_ALL	MF00068:mRNA splicing factor	21	1.29986e-05	ENSMUSG00000029817, ENSMUSG00000020409, ENSMUSG00000020180, ENSMUSG00000029345, ENSMUSG00000028676, ENSMUSG00000028330, ENSMUSG00000038774, ENSMUSG00000039449, ENSMUSG00000024097, ENSMUSG00000001767, ENSMUSG00000028820, ENSMUSG00000067873, ENSMUSG00000002455, ENSMUSG00000028902, ENSMUSG00000020680, ENSMUSG00000020018, ENSMUSG00000071172, ENSMUSG00000037197, ENSMUSG00000028911, ENSMUSG00000033732,…	3.03303	0.0163309	3.78699
PANTHER_MF_ALL	MF00133:Methyltransferase	25	1.57442e-05	ENSMUSG00000004099, ENSMUSG00000020661, ENSMUSG00000002028, ENSMUSG00000038279, ENSMUSG00000049327, ENSMUSG00000021488, ENSMUSG00000057406, ENSMUSG00000015697, ENSMUSG00000021311, ENSMUSG00000036779, ENSMUSG00000034575, ENSMUSG00000022160, ENSMUSG00000001467, ENSMUSG00000020257, ENSMUSG00000053286, ENSMUSG00000028233, ENSMUSG00000054823, ENSMUSG00000054619, ENSMUSG00000026192, ENSMUSG00000038056,…	2.67253	0.01978	3.70377
PANTHER_MF_ALL	MF00242:RNA helicase	16	0.000166767	ENSMUSG00000020719, ENSMUSG00000029169, ENSMUSG00000055065, ENSMUSG00000053289, ENSMUSG00000020075, ENSMUSG00000020721, ENSMUSG00000033658, ENSMUSG00000020076, ENSMUSG00000032097, ENSMUSG00000038774, ENSMUSG00000037993, ENSMUSG00000042426, ENSMUSG00000001674, ENSMUSG00000034931, ENSMUSG00000003360, ENSMUSG00000042699	3.05948	0.209332	2.67916
PANTHER_MF_ALL	MF00209:Hsp 70 family chaperone	7	0.000281072	ENSMUSG00000025757, ENSMUSG00000020361, ENSMUSG00000015656, ENSMUSG00000024359, ENSMUSG00000029657, ENSMUSG00000032115, ENSMUSG00000026864	6.78821	0.35258	2.45274
PANTHER_MF_ALL	MF00243:DNA helicase	15	0.00036177	ENSMUSG00000029920, ENSMUSG00000054051, ENSMUSG00000018474, ENSMUSG00000040565, ENSMUSG00000063870, ENSMUSG00000031715, ENSMUSG00000024921, ENSMUSG00000031229, ENSMUSG00000002428, ENSMUSG00000056608, ENSMUSG00000005045, ENSMUSG00000016018, ENSMUSG00000025209, ENSMUSG00000078671, ENSMUSG00000030079	2.9948	0.453597	2.34333
PANTHER_MF_ALL	MF00072:Translation initiation factor	15	0.000423636	ENSMUSG00000021116, ENSMUSG00000030738, ENSMUSG00000026254, ENSMUSG00000042500, ENSMUSG00000024991, ENSMUSG00000028842, ENSMUSG00000029145, ENSMUSG00000074656, ENSMUSG00000045983, ENSMUSG00000005610, ENSMUSG00000057561, ENSMUSG00000049658, ENSMUSG00000056076, ENSMUSG00000027236, ENSMUSG00000026083	2.9514	0.530976	2.27492
PANTHER_MF_ALL	MF00039:Other transcription factor	44	0.000702894	ENSMUSG00000052684, ENSMUSG00000029313, ENSMUSG00000056216, ENSMUSG00000043962, ENSMUSG00000038539, ENSMUSG00000029135, ENSMUSG00000003382, ENSMUSG00000024081, ENSMUSG00000024528, ENSMUSG00000026436, ENSMUSG00000028282, ENSMUSG00000035575, ENSMUSG00000032402, ENSMUSG00000023932, ENSMUSG00000008976, ENSMUSG00000038615, ENSMUSG00000056501, ENSMUSG00000051510, ENSMUSG00000031627, ENSMUSG00000024427,…	1.69705	0.879572	2.05573
PANTHER_MF_ALL	MF00069:Ribonucleoprotein	16	0.00124579	ENSMUSG00000020180, ENSMUSG00000030521, ENSMUSG00000060373, ENSMUSG00000008489, ENSMUSG00000068882, ENSMUSG00000026127, ENSMUSG00000020358, ENSMUSG00000050244, ENSMUSG00000059208, ENSMUSG00000004980, ENSMUSG00000059005, ENSMUSG00000044068, ENSMUSG00000033760, ENSMUSG00000061613, ENSMUSG00000046434, ENSMUSG00000046865	2.55556	1.55404	1.80854
PANTHER_MF_ALL	MF00169:Other isomerase	13	0.00142307	ENSMUSG00000042133, ENSMUSG00000015757, ENSMUSG00000030357, ENSMUSG00000056629, ENSMUSG00000025823, ENSMUSG00000028343, ENSMUSG00000025130, ENSMUSG00000079480, ENSMUSG00000059659, ENSMUSG00000020571, ENSMUSG00000027248, ENSMUSG00000024222, ENSMUSG00000027804	2.89334	1.77338	1.7512
PANTHER_MF_ALL	MF00275:Transcription cofactor	24	0.00207248	ENSMUSG00000029478, ENSMUSG00000039982, ENSMUSG00000032280, ENSMUSG00000072872, ENSMUSG00000055491, ENSMUSG00000040209, ENSMUSG00000048118, ENSMUSG00000032386, ENSMUSG00000006362, ENSMUSG00000002881, ENSMUSG00000018501, ENSMUSG00000015092, ENSMUSG00000039671, ENSMUSG00000019947, ENSMUSG00000045969, ENSMUSG00000020893, ENSMUSG00000055866, ENSMUSG00000071054, ENSMUSG00000011960, ENSMUSG00000035726,…	1.98679	2.57299	1.58956
PANTHER_MF_ALL	MF00036:Transcription factor	174	0.00219451	ENSMUSG00000071341, ENSMUSG00000063281, ENSMUSG00000063632, ENSMUSG00000050714, ENSMUSG00000018501, ENSMUSG00000039634, ENSMUSG00000038418, ENSMUSG00000031585, ENSMUSG00000021514, ENSMUSG00000061911, ENSMUSG00000037868, ENSMUSG00000029238, ENSMUSG00000026436, ENSMUSG00000035575, ENSMUSG00000008976, ENSMUSG00000021264, ENSMUSG00000038615, ENSMUSG00000071757, ENSMUSG00000051510, ENSMUSG00000046185,…	1.22908	2.72258	1.56502
PANTHER_MF_ALL	MF00078:Chaperonin	7	0.00325052	ENSMUSG00000007739, ENSMUSG00000025613, ENSMUSG00000030007, ENSMUSG00000001416, ENSMUSG00000027274, ENSMUSG00000025980, ENSMUSG00000073676	4.52548	4.00823	1.39705
PANTHER_MF_ALL	MF00108:Protein kinase	55	0.00969104	ENSMUSG00000009828, ENSMUSG00000020032, ENSMUSG00000025060, ENSMUSG00000018209, ENSMUSG00000008730, ENSMUSG00000034761, ENSMUSG00000021457, ENSMUSG00000032501, ENSMUSG00000073563, ENSMUSG00000028289, ENSMUSG00000004865, ENSMUSG00000024014, ENSMUSG00000032547, ENSMUSG00000029648, ENSMUSG00000017291, ENSMUSG00000038145, ENSMUSG00000060477, ENSMUSG00000061288, ENSMUSG00000021408, ENSMUSG00000024789,…	1.40622	11.5168
PANTHER_MF_ALL	MF00114:Protein phosphatase	19	0.0134079	ENSMUSG00000037926, ENSMUSG00000027540, ENSMUSG00000021051, ENSMUSG00000018648, ENSMUSG00000026309, ENSMUSG00000032290, ENSMUSG00000029147, ENSMUSG00000033953, ENSMUSG00000029120, ENSMUSG00000032058, ENSMUSG00000031530, ENSMUSG00000009630, ENSMUSG00000014956, ENSMUSG00000028771, ENSMUSG00000024539, ENSMUSG00000038582, ENSMUSG00000026064, ENSMUSG00000019960, ENSMUSG00000027303	1.85577	15.6001
PANTHER_MF_ALL	MF00170:Ligase	43	0.0168747	ENSMUSG00000032307, ENSMUSG00000039701, ENSMUSG00000005371, ENSMUSG00000037253, ENSMUSG00000061666, ENSMUSG00000049717, ENSMUSG00000029922, ENSMUSG00000035247, ENSMUSG00000030451, ENSMUSG00000022663, ENSMUSG00000009293, ENSMUSG00000022241, ENSMUSG00000020659, ENSMUSG00000016624, ENSMUSG00000018363, ENSMUSG00000025326, ENSMUSG00000031278, ENSMUSG00000039159, ENSMUSG00000024294, ENSMUSG00000040351,…	1.43085	19.2515
PANTHER_MF_ALL	MF00101:Guanyl-nucleotide exchange factor	18	0.0192075	ENSMUSG00000031442, ENSMUSG00000009681, ENSMUSG00000031511, ENSMUSG00000020021, ENSMUSG00000034602, ENSMUSG00000035954, ENSMUSG00000029145, ENSMUSG00000062232, ENSMUSG00000024241, ENSMUSG00000034801, ENSMUSG00000040687, ENSMUSG00000025340, ENSMUSG00000001768, ENSMUSG00000030465, ENSMUSG00000064181, ENSMUSG00000026024, ENSMUSG00000022263, ENSMUSG00000021895	1.8237	21.6262
PANTHER_MF_ALL	MF00107:Kinase	65	0.0216521	ENSMUSG00000009828, ENSMUSG00000020032, ENSMUSG00000025060, ENSMUSG00000018209, ENSMUSG00000008730, ENSMUSG00000034761, ENSMUSG00000021457, ENSMUSG00000032501, ENSMUSG00000073563, ENSMUSG00000028289, ENSMUSG00000004865, ENSMUSG00000024014, ENSMUSG00000032547, ENSMUSG00000029648, ENSMUSG00000038145, ENSMUSG00000017291, ENSMUSG00000060477, ENSMUSG00000061288, ENSMUSG00000021408, ENSMUSG00000024789,…	1.30543	24.0456
PANTHER_MF_ALL	MF00113:Phosphatase	29	0.0217246	ENSMUSG00000027531, ENSMUSG00000026617, ENSMUSG00000021051, ENSMUSG00000025240, ENSMUSG00000026773, ENSMUSG00000026309, ENSMUSG00000032290, ENSMUSG00000033953, ENSMUSG00000021987, ENSMUSG00000037926, ENSMUSG00000027668, ENSMUSG00000027540, ENSMUSG00000018648, ENSMUSG00000029147, ENSMUSG00000029120, ENSMUSG00000032058, ENSMUSG00000009630, ENSMUSG00000031530, ENSMUSG00000028274, ENSMUSG00000014956,…	1.54399	24.1162
KEGG_PATHWAY	mmu03040:Spliceosome	42	6.3658e-18	ENSMUSG00000029817, ENSMUSG00000040383, ENSMUSG00000028609, ENSMUSG00000060373, ENSMUSG00000063800, ENSMUSG00000015656, ENSMUSG00000028676, ENSMUSG00000039449, ENSMUSG00000059659, ENSMUSG00000037993, ENSMUSG00000001383, ENSMUSG00000040824, ENSMUSG00000023932, ENSMUSG00000059208, ENSMUSG00000034931, ENSMUSG00000059005, ENSMUSG00000002455, ENSMUSG00000028902, ENSMUSG00000071172, ENSMUSG00000027881,…	4.72875	7.59303e-15	16.1196
KEGG_PATHWAY	mmu04722:Neurotrophin signaling pathway	27	1.09248e-06	ENSMUSG00000052684, ENSMUSG00000052681, ENSMUSG00000048482, ENSMUSG00000036333, ENSMUSG00000020849, ENSMUSG00000030733, ENSMUSG00000024241, ENSMUSG00000034801, ENSMUSG00000035109, ENSMUSG00000071369, ENSMUSG00000021514, ENSMUSG00000051391, ENSMUSG00000060477, ENSMUSG00000022285, ENSMUSG00000030265, ENSMUSG00000035529, ENSMUSG00000019699, ENSMUSG00000059923, ENSMUSG00000018965, ENSMUSG00000053436,…	2.89961	0.00130309	4.88503
KEGG_PATHWAY	mmu04010:MAPK signaling pathway	34	0.00106737	ENSMUSG00000052684, ENSMUSG00000024242, ENSMUSG00000052681, ENSMUSG00000048482, ENSMUSG00000018209, ENSMUSG00000015656, ENSMUSG00000000489, ENSMUSG00000024241, ENSMUSG00000034801, ENSMUSG00000071369, ENSMUSG00000033953, ENSMUSG00000026436, ENSMUSG00000025408, ENSMUSG00000033618, ENSMUSG00000017291, ENSMUSG00000026074, ENSMUSG00000061288, ENSMUSG00000030265, ENSMUSG00000019699, ENSMUSG00000059923,…	1.79123	1.26574	1.89766
KEGG_PATHWAY	mmu05211:Renal cell carcinoma	14	0.00116332	ENSMUSG00000052684, ENSMUSG00000032633, ENSMUSG00000052681, ENSMUSG00000030265, ENSMUSG00000019699, ENSMUSG00000059923, ENSMUSG00000000489, ENSMUSG00000024241, ENSMUSG00000034801, ENSMUSG00000021253, ENSMUSG00000058709, ENSMUSG00000023951, ENSMUSG00000025499, ENSMUSG00000017776	2.79221	1.37881	1.8605
KEGG_PATHWAY	mmu04710:Circadian rhythm	6	0.00144644	ENSMUSG00000020893, ENSMUSG00000055866, ENSMUSG00000029238, ENSMUSG00000020038, ENSMUSG00000055116, ENSMUSG00000030103	6.44357	1.71172	1.76657
KEGG_PATHWAY	mmu05215:Prostate cancer	16	0.00159197	ENSMUSG00000025958, ENSMUSG00000030265, ENSMUSG00000020053, ENSMUSG00000019699, ENSMUSG00000059923, ENSMUSG00000023944, ENSMUSG00000000489, ENSMUSG00000024241, ENSMUSG00000020184, ENSMUSG00000034801, ENSMUSG00000005533, ENSMUSG00000057329, ENSMUSG00000021270, ENSMUSG00000025499, ENSMUSG00000020048, ENSMUSG00000023067	2.48197	1.88245	1.72528
KEGG_PATHWAY	mmu04510:Focal adhesion	27	0.00167962	ENSMUSG00000052684, ENSMUSG00000052681, ENSMUSG00000025809, ENSMUSG00000020053, ENSMUSG00000000489, ENSMUSG00000024241, ENSMUSG00000034801, ENSMUSG00000035109, ENSMUSG00000005533, ENSMUSG00000023951, ENSMUSG00000029648, ENSMUSG00000019907, ENSMUSG00000034165, ENSMUSG00000026478, ENSMUSG00000024290, ENSMUSG00000029306, ENSMUSG00000024456, ENSMUSG00000019699, ENSMUSG00000059923, ENSMUSG00000002900,…	1.90378	1.98514	1.70221
KEGG_PATHWAY	mmu05200:Pathways in cancer	38	0.0025035	ENSMUSG00000052684, ENSMUSG00000009681, ENSMUSG00000005370, ENSMUSG00000018209, ENSMUSG00000025809, ENSMUSG00000020053, ENSMUSG00000000489, ENSMUSG00000024241, ENSMUSG00000034801, ENSMUSG00000005533, ENSMUSG00000037992, ENSMUSG00000058709, ENSMUSG00000023951, ENSMUSG00000032402, ENSMUSG00000026430, ENSMUSG00000008859, ENSMUSG00000023067, ENSMUSG00000026478, ENSMUSG00000048701, ENSMUSG00000032487,…	1.64248	2.94562	1.53082
KEGG_PATHWAY	mmu05214:Glioma	12	0.00511188	ENSMUSG00000030265, ENSMUSG00000020053, ENSMUSG00000019699, ENSMUSG00000025499, ENSMUSG00000059923, ENSMUSG00000023067, ENSMUSG00000000489, ENSMUSG00000034801, ENSMUSG00000024241, ENSMUSG00000035109, ENSMUSG00000020184, ENSMUSG00000005533	2.6177	5.92992	1.22695
KEGG_PATHWAY	mmu05221:Acute myeloid leukemia	11	0.00642929	ENSMUSG00000066687, ENSMUSG00000037992, ENSMUSG00000024014, ENSMUSG00000030265, ENSMUSG00000004040, ENSMUSG00000019699, ENSMUSG00000002250, ENSMUSG00000025499, ENSMUSG00000059923, ENSMUSG00000034801, ENSMUSG00000024241	2.69424	7.40501	1.13047
KEGG_PATHWAY	mmu05220:Chronic myeloid leukemia	13	0.00710544	ENSMUSG00000021253, ENSMUSG00000009681, ENSMUSG00000032402, ENSMUSG00000030265, ENSMUSG00000019699, ENSMUSG00000025499, ENSMUSG00000059923, ENSMUSG00000017776, ENSMUSG00000023067, ENSMUSG00000034801, ENSMUSG00000024241, ENSMUSG00000035109, ENSMUSG00000020184	2.38808	8.15383	1.08864
KEGG_PATHWAY	mmu04910:Insulin signaling pathway	19	0.00892467	ENSMUSG00000027540, ENSMUSG00000026254, ENSMUSG00000030265, ENSMUSG00000032601, ENSMUSG00000019699, ENSMUSG00000059923, ENSMUSG00000024241, ENSMUSG00000035109, ENSMUSG00000034801, ENSMUSG00000014956, ENSMUSG00000067279, ENSMUSG00000038894, ENSMUSG00000020612, ENSMUSG00000025499, ENSMUSG00000017776, ENSMUSG00000028944, ENSMUSG00000037012, ENSMUSG00000028945, ENSMUSG00000019487	1.92218	10.1411
KEGG_PATHWAY	mmu04114:Oocyte meiosis	16	0.0162108	ENSMUSG00000021051, ENSMUSG00000025060, ENSMUSG00000020053, ENSMUSG00000020849, ENSMUSG00000041133, ENSMUSG00000018965, ENSMUSG00000033953, ENSMUSG00000005533, ENSMUSG00000032058, ENSMUSG00000009630, ENSMUSG00000014956, ENSMUSG00000022994, ENSMUSG00000051391, ENSMUSG00000024974, ENSMUSG00000035048, ENSMUSG00000022285	1.94241	17.712
DOWN
Category	Term	Count	un-adjusted p-value	Genes	Fold Enrichment	FDR [%]	-log10 (FDR/100)
GOTERM_BP_5	GO:0044267~cellular protein metabolic process	119	1.65664e-05	ENSMUSG00000019428, ENSMUSG00000069631, ENSMUSG00000009563, ENSMUSG00000043572, ENSMUSG00000062997, ENSMUSG00000028703, ENSMUSG00000039233, ENSMUSG00000046947, ENSMUSG00000050796, ENSMUSG00000028708, ENSMUSG00000030319, ENSMUSG00000025486, ENSMUSG00000030083, ENSMUSG00000030314, ENSMUSG00000020905, ENSMUSG00000037805, ENSMUSG00000020258, ENSMUSG00000005469, ENSMUSG00000035299, ENSMUSG00000028234,…	1.44208	0.026353	3.57917
GOTERM_BP_5	GO:0006412~translation	26	0.000855729	ENSMUSG00000060143, ENSMUSG00000031167, ENSMUSG00000062997, ENSMUSG00000043572, ENSMUSG00000070343, ENSMUSG00000027613, ENSMUSG00000021967, ENSMUSG00000066809, ENSMUSG00000030083, ENSMUSG00000069117, ENSMUSG00000053565, ENSMUSG00000057322, ENSMUSG00000024831, ENSMUSG00000027810, ENSMUSG00000062456, ENSMUSG00000037805, ENSMUSG00000080921, ENSMUSG00000004233, ENSMUSG00000028234, ENSMUSG00000039221,…	2.06232	1.35276	1.86878
GOTERM_BP_5	GO:0015031~protein transport	41	0.00355842	ENSMUSG00000029198, ENSMUSG00000032952, ENSMUSG00000027679, ENSMUSG00000024870, ENSMUSG00000000131, ENSMUSG00000069631, ENSMUSG00000041073, ENSMUSG00000022808, ENSMUSG00000025142, ENSMUSG00000027575, ENSMUSG00000002984, ENSMUSG00000021357, ENSMUSG00000060279, ENSMUSG00000056185, ENSMUSG00000061455, ENSMUSG00000002059, ENSMUSG00000030314, ENSMUSG00000057322, ENSMUSG00000031889, ENSMUSG00000028975,…	1.59359	5.51352	1.25857
GOTERM_BP_5	GO:0046942~carboxylic acid transport	11	0.00559265	ENSMUSG00000020829, ENSMUSG00000046959, ENSMUSG00000022464, ENSMUSG00000020805, ENSMUSG00000010064, ENSMUSG00000022756, ENSMUSG00000049624, ENSMUSG00000063652, ENSMUSG00000031808, ENSMUSG00000030096, ENSMUSG00000001436	2.81145	8.53608	1.06874
GOTERM_BP_5	GO:0042158~lipoprotein biosynthetic process	8	0.00560204	ENSMUSG00000028454, ENSMUSG00000039199, ENSMUSG00000022561, ENSMUSG00000040472, ENSMUSG00000022940, ENSMUSG00000043257, ENSMUSG00000041958, ENSMUSG00000030314	3.68045	8.54981	1.06804
GOTERM_BP_5	GO:0045017~glycerolipid biosynthetic process	8	0.00750413	ENSMUSG00000028454, ENSMUSG00000022617, ENSMUSG00000022561, ENSMUSG00000022555, ENSMUSG00000000301, ENSMUSG00000022940, ENSMUSG00000043257, ENSMUSG00000041958	3.49008	11.2935
GOTERM_BP_5	GO:0006650~glycerophospholipid metabolic process	10	0.00773828	ENSMUSG00000028454, ENSMUSG00000022617, ENSMUSG00000026925, ENSMUSG00000022561, ENSMUSG00000009995, ENSMUSG00000046854, ENSMUSG00000000301, ENSMUSG00000022940, ENSMUSG00000043257, ENSMUSG00000041958	2.87535	11.6258
GOTERM_BP_5	GO:0006259~DNA metabolic process	28	0.00895031	ENSMUSG00000052139, ENSMUSG00000003812, ENSMUSG00000040174, ENSMUSG00000030528, ENSMUSG00000022248, ENSMUSG00000079109, ENSMUSG00000031583, ENSMUSG00000024019, ENSMUSG00000055401, ENSMUSG00000023104, ENSMUSG00000006585, ENSMUSG00000033970, ENSMUSG00000031820, ENSMUSG00000041346, ENSMUSG00000002109, ENSMUSG00000021287, ENSMUSG00000028212, ENSMUSG00000038685, ENSMUSG00000020167, ENSMUSG00000038225,…	1.68287	13.3277
GOTERM_BP_5	GO:0046474~glycerophospholipid biosynthetic process	7	0.00896139	ENSMUSG00000028454, ENSMUSG00000022617, ENSMUSG00000022561, ENSMUSG00000000301, ENSMUSG00000022940, ENSMUSG00000043257, ENSMUSG00000041958	3.85047	13.3431
GOTERM_BP_5	GO:0010565~regulation of cellular ketone metabolic process	5	0.0116551	ENSMUSG00000020538, ENSMUSG00000074064, ENSMUSG00000041798, ENSMUSG00000045294, ENSMUSG00000032485	5.50067	17.0153
GOTERM_BP_5	GO:0006783~heme biosynthetic process	4	0.0129758	ENSMUSG00000032786, ENSMUSG00000062729, ENSMUSG00000028393, ENSMUSG00000023030	7.78557	18.7621
GOTERM_BP_5	GO:0046486~glycerolipid metabolic process	12	0.0130012	ENSMUSG00000028454, ENSMUSG00000022617, ENSMUSG00000026925, ENSMUSG00000045294, ENSMUSG00000022561, ENSMUSG00000022555, ENSMUSG00000009995, ENSMUSG00000046854, ENSMUSG00000000301, ENSMUSG00000022940, ENSMUSG00000043257, ENSMUSG00000041958	2.35378	18.7953
GOTERM_CC_5	GO:0043231~intracellular membrane-bounded organelle	381	3.5133e-10	ENSMUSG00000000131, ENSMUSG00000048755, ENSMUSG00000058076, ENSMUSG00000064030, ENSMUSG00000025792, ENSMUSG00000009563, ENSMUSG00000030647, ENSMUSG00000043572, ENSMUSG00000030641, ENSMUSG00000070420, ENSMUSG00000009566, ENSMUSG00000046947, ENSMUSG00000033379, ENSMUSG00000042308, ENSMUSG00000042032, ENSMUSG00000025486, ENSMUSG00000025512, ENSMUSG00000037260, ENSMUSG00000026632, ENSMUSG00000059734,…	1.24301	4.64541e-07	8.33298
GOTERM_CC_5	GO:0043229~intracellular organelle	418	5.19048e-10	ENSMUSG00000048755, ENSMUSG00000025792, ENSMUSG00000030647, ENSMUSG00000043572, ENSMUSG00000030641, ENSMUSG00000046947, ENSMUSG00000033379, ENSMUSG00000042308, ENSMUSG00000042032, ENSMUSG00000025512, ENSMUSG00000025486, ENSMUSG00000037260, ENSMUSG00000059734, ENSMUSG00000041477, ENSMUSG00000032786, ENSMUSG00000037805, ENSMUSG00000020258, ENSMUSG00000035299, ENSMUSG00000068706, ENSMUSG00000012848,…	1.20863	6.86304e-07	8.16348
GOTERM_CC_5	GO:0044444~cytoplasmic part	245	1.23367e-09	ENSMUSG00000048755, ENSMUSG00000058076, ENSMUSG00000025792, ENSMUSG00000030647, ENSMUSG00000009563, ENSMUSG00000043572, ENSMUSG00000009566, ENSMUSG00000046947, ENSMUSG00000033379, ENSMUSG00000042032, ENSMUSG00000025486, ENSMUSG00000025512, ENSMUSG00000037260, ENSMUSG00000026632, ENSMUSG00000059734, ENSMUSG00000032786, ENSMUSG00000037805, ENSMUSG00000049624, ENSMUSG00000020258, ENSMUSG00000068706,…	1.386	1.63121e-06	7.78749
GOTERM_CC_5	GO:0005737~cytoplasm	330	1.65933e-06	ENSMUSG00000000131, ENSMUSG00000036533, ENSMUSG00000048755, ENSMUSG00000054723, ENSMUSG00000058076, ENSMUSG00000064030, ENSMUSG00000025792, ENSMUSG00000009563, ENSMUSG00000030647, ENSMUSG00000043572, ENSMUSG00000030641, ENSMUSG00000009566, ENSMUSG00000046947, ENSMUSG00000033379, ENSMUSG00000042032, ENSMUSG00000025486, ENSMUSG00000025512, ENSMUSG00000037260, ENSMUSG00000026632, ENSMUSG00000059734,…	1.20762	0.00219401	4.65876
GOTERM_CC_5	GO:0005739~mitochondrion	86	4.96172e-05	ENSMUSG00000019428, ENSMUSG00000028247, ENSMUSG00000005510, ENSMUSG00000026096, ENSMUSG00000024870, ENSMUSG00000034285, ENSMUSG00000035505, ENSMUSG00000021033, ENSMUSG00000048755, ENSMUSG00000058076, ENSMUSG00000025792, ENSMUSG00000030647, ENSMUSG00000018042, ENSMUSG00000048489, ENSMUSG00000043572, ENSMUSG00000047363, ENSMUSG00000009566, ENSMUSG00000062683, ENSMUSG00000046947, ENSMUSG00000060376,…	1.53977	0.0655858	3.18319
GOTERM_CC_5	GO:0044429~mitochondrial part	41	0.00020931	ENSMUSG00000019428, ENSMUSG00000029198, ENSMUSG00000005510, ENSMUSG00000028247, ENSMUSG00000027679, ENSMUSG00000035505, ENSMUSG00000034285, ENSMUSG00000018796, ENSMUSG00000058076, ENSMUSG00000062729, ENSMUSG00000025792, ENSMUSG00000030647, ENSMUSG00000054021, ENSMUSG00000018042, ENSMUSG00000043572, ENSMUSG00000047363, ENSMUSG00000002984, ENSMUSG00000025465, ENSMUSG00000060376, ENSMUSG00000032480,…	1.852	0.276404	2.55846
GOTERM_CC_5	GO:0005773~vacuole	21	0.000400597	ENSMUSG00000081534, ENSMUSG00000083282, ENSMUSG00000000594, ENSMUSG00000022453, ENSMUSG00000033124, ENSMUSG00000029408, ENSMUSG00000003812, ENSMUSG00000049624, ENSMUSG00000050211, ENSMUSG00000015027, ENSMUSG00000026411, ENSMUSG00000005142, ENSMUSG00000029598, ENSMUSG00000033379, ENSMUSG00000002395, ENSMUSG00000025512, ENSMUSG00000022620, ENSMUSG00000023030, ENSMUSG00000028307, ENSMUSG00000037260,…	2.43656	0.528389	2.27705
GOTERM_CC_5	GO:0005783~endoplasmic reticulum	57	0.000409652	ENSMUSG00000019428, ENSMUSG00000018042, ENSMUSG00000009563, ENSMUSG00000055493, ENSMUSG00000052369, ENSMUSG00000028980, ENSMUSG00000020538, ENSMUSG00000058183, ENSMUSG00000045294, ENSMUSG00000039787, ENSMUSG00000032482, ENSMUSG00000031169, ENSMUSG00000027297, ENSMUSG00000061455, ENSMUSG00000073792, ENSMUSG00000032485, ENSMUSG00000024191, ENSMUSG00000031708, ENSMUSG00000002279, ENSMUSG00000039427,…	1.60997	0.540303	2.26736
GOTERM_CC_5	GO:0000323~lytic vacuole	19	0.00056863	ENSMUSG00000081534, ENSMUSG00000083282, ENSMUSG00000000594, ENSMUSG00000022453, ENSMUSG00000029408, ENSMUSG00000003812, ENSMUSG00000049624, ENSMUSG00000050211, ENSMUSG00000015027, ENSMUSG00000026411, ENSMUSG00000005142, ENSMUSG00000029598, ENSMUSG00000002395, ENSMUSG00000025512, ENSMUSG00000022620, ENSMUSG00000023030, ENSMUSG00000028307, ENSMUSG00000037260, ENSMUSG00000001418	2.5124	0.749255	2.12537
GOTERM_CC_5	GO:0044438~microbody part	7	0.00164032	ENSMUSG00000028975, ENSMUSG00000018796, ENSMUSG00000029047, ENSMUSG00000029098, ENSMUSG00000063652, ENSMUSG00000019809, ENSMUSG00000000876	5.34471	2.14728	1.66811
GOTERM_CC_5	GO:0044439~peroxisomal part	7	0.00164032	ENSMUSG00000028975, ENSMUSG00000018796, ENSMUSG00000029047, ENSMUSG00000029098, ENSMUSG00000063652, ENSMUSG00000019809, ENSMUSG00000000876	5.34471	2.14728	1.66811
GOTERM_CC_5	GO:0005740~mitochondrial envelope	30	0.00232812	ENSMUSG00000019428, ENSMUSG00000005510, ENSMUSG00000027679, ENSMUSG00000035505, ENSMUSG00000034285, ENSMUSG00000018796, ENSMUSG00000058076, ENSMUSG00000062729, ENSMUSG00000025792, ENSMUSG00000030647, ENSMUSG00000054021, ENSMUSG00000018042, ENSMUSG00000047363, ENSMUSG00000002984, ENSMUSG00000070283, ENSMUSG00000003528, ENSMUSG00000028973, ENSMUSG00000071711, ENSMUSG00000051343, ENSMUSG00000064068,…	1.81607	3.0349	1.51786
GOTERM_CC_5	GO:0005840~ribosome	18	0.00317244	ENSMUSG00000067344, ENSMUSG00000057322, ENSMUSG00000062456, ENSMUSG00000060143, ENSMUSG00000037805, ENSMUSG00000062997, ENSMUSG00000080921, ENSMUSG00000028234, ENSMUSG00000070343, ENSMUSG00000039221, ENSMUSG00000008682, ENSMUSG00000012848, ENSMUSG00000010406, ENSMUSG00000021967, ENSMUSG00000066809, ENSMUSG00000030879, ENSMUSG00000046721, ENSMUSG00000081344, ENSMUSG00000069117, ENSMUSG00000055553	2.21901	4.11435	1.3857
GOTERM_CC_5	GO:0031903~microbody membrane	6	0.00413323	ENSMUSG00000028975, ENSMUSG00000018796, ENSMUSG00000029047, ENSMUSG00000063652, ENSMUSG00000019809, ENSMUSG00000000876	5.46218	5.32918	1.27334
GOTERM_CC_5	GO:0005778~peroxisomal membrane	6	0.00413323	ENSMUSG00000028975, ENSMUSG00000018796, ENSMUSG00000029047, ENSMUSG00000063652, ENSMUSG00000019809, ENSMUSG00000000876	5.46218	5.32918	1.27334
GOTERM_CC_5	GO:0042579~microbody	12	0.00437919	ENSMUSG00000030303, ENSMUSG00000032558, ENSMUSG00000074064, ENSMUSG00000028975, ENSMUSG00000003464, ENSMUSG00000018796, ENSMUSG00000029047, ENSMUSG00000029098, ENSMUSG00000063652, ENSMUSG00000019809, ENSMUSG00000000876, ENSMUSG00000041939	2.73109	5.63787	1.24889
GOTERM_CC_5	GO:0005777~peroxisome	12	0.00437919	ENSMUSG00000030303, ENSMUSG00000032558, ENSMUSG00000074064, ENSMUSG00000028975, ENSMUSG00000003464, ENSMUSG00000018796, ENSMUSG00000029047, ENSMUSG00000029098, ENSMUSG00000063652, ENSMUSG00000019809, ENSMUSG00000000876, ENSMUSG00000041939	2.73109	5.63787	1.24889
GOTERM_CC_5	GO:0031967~organelle envelope	37	0.00445889	ENSMUSG00000019428, ENSMUSG00000005510, ENSMUSG00000027679, ENSMUSG00000035505, ENSMUSG00000034285, ENSMUSG00000000131, ENSMUSG00000018796, ENSMUSG00000058076, ENSMUSG00000062729, ENSMUSG00000025792, ENSMUSG00000030647, ENSMUSG00000054021, ENSMUSG00000018042, ENSMUSG00000047363, ENSMUSG00000002984, ENSMUSG00000027613, ENSMUSG00000070283, ENSMUSG00000003528, ENSMUSG00000057322, ENSMUSG00000028973,…	1.62179	5.7377	1.24126
GOTERM_CC_5	GO:0044446~intracellular organelle part	158	0.0160202	ENSMUSG00000019428, ENSMUSG00000028247, ENSMUSG00000000131, ENSMUSG00000058076, ENSMUSG00000064030, ENSMUSG00000025792, ENSMUSG00000030647, ENSMUSG00000022842, ENSMUSG00000018042, ENSMUSG00000043572, ENSMUSG00000031583, ENSMUSG00000028980, ENSMUSG00000019261, ENSMUSG00000029715, ENSMUSG00000050796, ENSMUSG00000041775, ENSMUSG00000033379, ENSMUSG00000029712, ENSMUSG00000042308, ENSMUSG00000061455,…	1.17087	19.228
GOTERM_CC_5	GO:0005741~mitochondrial outer membrane	9	0.0192925	ENSMUSG00000018796, ENSMUSG00000051343, ENSMUSG00000064068, ENSMUSG00000018042, ENSMUSG00000020085, ENSMUSG00000068922, ENSMUSG00000047363, ENSMUSG00000032109, ENSMUSG00000002984	2.66281	22.7084
GOTERM_CC_5	GO:0031300~intrinsic to organelle membrane	11	0.0198642	ENSMUSG00000019428, ENSMUSG00000035505, ENSMUSG00000025158, ENSMUSG00000031169, ENSMUSG00000062729, ENSMUSG00000022561, ENSMUSG00000063652, ENSMUSG00000019809, ENSMUSG00000006731, ENSMUSG00000033684, ENSMUSG00000002984	2.32468	23.3021
GOTERM_MF_5	GO:0015923~mannosidase activity	5	0.00186997	ENSMUSG00000032295, ENSMUSG00000005142, ENSMUSG00000036646, ENSMUSG00000040520, ENSMUSG00000038312	8.91972	2.32613	1.63337
GOTERM_MF_5	GO:0046914~transition metal ion binding	119	0.00840236	ENSMUSG00000020472, ENSMUSG00000016386, ENSMUSG00000059142, ENSMUSG00000044628, ENSMUSG00000058076, ENSMUSG00000045251, ENSMUSG00000022842, ENSMUSG00000020889, ENSMUSG00000001844, ENSMUSG00000070420, ENSMUSG00000019823, ENSMUSG00000026199, ENSMUSG00000050796, ENSMUSG00000043635, ENSMUSG00000025486, ENSMUSG00000017386, ENSMUSG00000034621, ENSMUSG00000059734, ENSMUSG00000066829, ENSMUSG00000004815,…	1.22099	10.0668
GOTERM_MF_5	GO:0032559~adenyl ribonucleotide binding	70	0.0198117	ENSMUSG00000069631, ENSMUSG00000009563, ENSMUSG00000043572, ENSMUSG00000031583, ENSMUSG00000009566, ENSMUSG00000046947, ENSMUSG00000028708, ENSMUSG00000036622, ENSMUSG00000032480, ENSMUSG00000029712, ENSMUSG00000033970, ENSMUSG00000027297, ENSMUSG00000046854, ENSMUSG00000033862, ENSMUSG00000004815, ENSMUSG00000028973, ENSMUSG00000020258, ENSMUSG00000031862, ENSMUSG00000005469, ENSMUSG00000030802,…	1.28297	22.2464
PANTHER_BP_ALL	BP00146:Extracellular transport and import	10	0.00194255	ENSMUSG00000028973, ENSMUSG00000030310, ENSMUSG00000036196, ENSMUSG00000046959, ENSMUSG00000029408, ENSMUSG00000049624, ENSMUSG00000032842, ENSMUSG00000063652, ENSMUSG00000028970, ENSMUSG00000030096	3.55306	2.37941	1.62353
PANTHER_BP_ALL	BP00001:Carbohydrate metabolism	31	0.00377742	ENSMUSG00000032295, ENSMUSG00000026791, ENSMUSG00000022453, ENSMUSG00000030815, ENSMUSG00000058076, ENSMUSG00000005534, ENSMUSG00000029513, ENSMUSG00000028980, ENSMUSG00000038555, ENSMUSG00000036646, ENSMUSG00000041798, ENSMUSG00000025465, ENSMUSG00000031489, ENSMUSG00000034793, ENSMUSG00000042032, ENSMUSG00000025512, ENSMUSG00000038312, ENSMUSG00000036820, ENSMUSG00000037089, ENSMUSG00000020258,…	1.73598	4.579	1.33923
PANTHER_BP_ALL	BP00063:Protein modification	53	0.00660325	ENSMUSG00000032295, ENSMUSG00000022453, ENSMUSG00000069631, ENSMUSG00000055493, ENSMUSG00000029513, ENSMUSG00000050796, ENSMUSG00000028708, ENSMUSG00000069020, ENSMUSG00000027297, ENSMUSG00000024777, ENSMUSG00000073792, ENSMUSG00000032185, ENSMUSG00000033862, ENSMUSG00000040472, ENSMUSG00000005469, ENSMUSG00000001751, ENSMUSG00000030802, ENSMUSG00000027603, ENSMUSG00000039427, ENSMUSG00000024952,…	1.44091	7.87758	1.10361
PANTHER_BP_ALL	BP00034:DNA metabolism	18	0.011666	ENSMUSG00000037395, ENSMUSG00000024831, ENSMUSG00000003812, ENSMUSG00000038685, ENSMUSG00000030528, ENSMUSG00000022248, ENSMUSG00000079109, ENSMUSG00000031583, ENSMUSG00000041147, ENSMUSG00000023104, ENSMUSG00000033970, ENSMUSG00000025218, ENSMUSG00000002814, ENSMUSG00000002109, ENSMUSG00000021287, ENSMUSG00000030400, ENSMUSG00000006395, ENSMUSG00000026632	1.94549	13.5264
PANTHER_BP_ALL	BP00087:Porphyrin metabolism	4	0.0136819	ENSMUSG00000032786, ENSMUSG00000022453, ENSMUSG00000062729, ENSMUSG00000028393	7.72791	15.6857
PANTHER_BP_ALL	BP00289:Other metabolism	29	0.0155978	ENSMUSG00000058076, ENSMUSG00000040272, ENSMUSG00000069631, ENSMUSG00000069835, ENSMUSG00000024948, ENSMUSG00000009566, ENSMUSG00000035027, ENSMUSG00000069020, ENSMUSG00000039826, ENSMUSG00000031489, ENSMUSG00000027134, ENSMUSG00000022561, ENSMUSG00000005774, ENSMUSG00000042073, ENSMUSG00000009995, ENSMUSG00000031808, ENSMUSG00000039450, ENSMUSG00000027810, ENSMUSG00000002968, ENSMUSG00000004637,…	1.59508	17.6918
PANTHER_MF_ALL	MF00082:Transporter	38	0.000733647	ENSMUSG00000001082, ENSMUSG00000039463, ENSMUSG00000030310, ENSMUSG00000038963, ENSMUSG00000026791, ENSMUSG00000035505, ENSMUSG00000036196, ENSMUSG00000025792, ENSMUSG00000063652, ENSMUSG00000062683, ENSMUSG00000059336, ENSMUSG00000038555, ENSMUSG00000036622, ENSMUSG00000033379, ENSMUSG00000030089, ENSMUSG00000031808, ENSMUSG00000025938, ENSMUSG00000028973, ENSMUSG00000029408, ENSMUSG00000049624,…	1.78651	0.896564	2.04742
PANTHER_MF_ALL	MF00141:Hydrolase	38	0.00296131	ENSMUSG00000032295, ENSMUSG00000031161, ENSMUSG00000022453, ENSMUSG00000003812, ENSMUSG00000054021, ENSMUSG00000022248, ENSMUSG00000022681, ENSMUSG00000029715, ENSMUSG00000036646, ENSMUSG00000036622, ENSMUSG00000005682, ENSMUSG00000033379, ENSMUSG00000025739, ENSMUSG00000022620, ENSMUSG00000025486, ENSMUSG00000025512, ENSMUSG00000042073, ENSMUSG00000021287, ENSMUSG00000038312, ENSMUSG00000025937,…	1.64987	3.57386	1.44686
PANTHER_MF_ALL	MF00146:Deacetylase	5	0.00939092	ENSMUSG00000031161, ENSMUSG00000036820, ENSMUSG00000062906, ENSMUSG00000054021, ENSMUSG00000025486	5.89477	10.9331
PANTHER_MF_ALL	MF00131:Transferase	42	0.011522	ENSMUSG00000028247, ENSMUSG00000020868, ENSMUSG00000039345, ENSMUSG00000021033, ENSMUSG00000029199, ENSMUSG00000048755, ENSMUSG00000034126, ENSMUSG00000040272, ENSMUSG00000069631, ENSMUSG00000069835, ENSMUSG00000024948, ENSMUSG00000050796, ENSMUSG00000035027, ENSMUSG00000025465, ENSMUSG00000023104, ENSMUSG00000033970, ENSMUSG00000042308, ENSMUSG00000027134, ENSMUSG00000073792, ENSMUSG00000036599,…	1.47471	13.2561
PANTHER_MF_ALL	MF00118:Synthase and synthetase	15	0.011761	ENSMUSG00000051169, ENSMUSG00000026095, ENSMUSG00000032786, ENSMUSG00000032763, ENSMUSG00000029199, ENSMUSG00000040272, ENSMUSG00000043572, ENSMUSG00000004233, ENSMUSG00000009566, ENSMUSG00000062683, ENSMUSG00000051557, ENSMUSG00000025465, ENSMUSG00000007029, ENSMUSG00000033379, ENSMUSG00000039826	2.11886	13.5132
KEGG_PATHWAY	mmu03010:Ribosome	15	4.69599e-06	ENSMUSG00000067344, ENSMUSG00000057322, ENSMUSG00000062456, ENSMUSG00000060143, ENSMUSG00000037805, ENSMUSG00000062997, ENSMUSG00000080921, ENSMUSG00000028234, ENSMUSG00000070343, ENSMUSG00000039221, ENSMUSG00000008682, ENSMUSG00000012848, ENSMUSG00000066809, ENSMUSG00000046721, ENSMUSG00000081344, ENSMUSG00000069117, ENSMUSG00000055553	4.45658	0.00567624	4.24594
KEGG_PATHWAY	mmu04142:Lysosome	14	0.000484176	ENSMUSG00000032952, ENSMUSG00000083282, ENSMUSG00000000594, ENSMUSG00000022453, ENSMUSG00000029408, ENSMUSG00000003812, ENSMUSG00000049624, ENSMUSG00000001751, ENSMUSG00000015027, ENSMUSG00000005142, ENSMUSG00000033379, ENSMUSG00000022620, ENSMUSG00000023030, ENSMUSG00000037260	3.11087	0.58369	2.23382
KEGG_PATHWAY	mmu00532:Chondroitin sulfate biosynthesis	5	0.00837497	ENSMUSG00000020868, ENSMUSG00000050796, ENSMUSG00000038181, ENSMUSG00000071649, ENSMUSG00000036599	6.00964	9.6664	1.01474
KEGG_PATHWAY	mmu00563:Glycosylphosphatidylinositol(GPI)-anchor biosynthesis	5	0.0132634	ENSMUSG00000028454, ENSMUSG00000022561, ENSMUSG00000022940, ENSMUSG00000043257, ENSMUSG00000041958	5.28848	14.9046
KEGG_PATHWAY	mmu04910:Insulin signaling pathway	12	0.0144671	ENSMUSG00000020538, ENSMUSG00000024830, ENSMUSG00000031490, ENSMUSG00000041798, ENSMUSG00000028708, ENSMUSG00000035027, ENSMUSG00000030815, ENSMUSG00000020312, ENSMUSG00000005469, ENSMUSG00000005534, ENSMUSG00000006127, ENSMUSG00000029513	2.29934	16.1509
COMBINED
Category	Term	Count	un-adjusted p-value	Genes	Fold Enrichment	FDR [%]	-log10 (FDR/100)
GOTERM_BP_5	GO:0044267~cellular protein metabolic process	389	7.79974e-22	ENSMUSG00000026254, ENSMUSG00000024360, ENSMUSG00000019774, ENSMUSG00000043572, ENSMUSG00000025103, ENSMUSG00000028703, ENSMUSG00000032501, ENSMUSG00000073563, ENSMUSG00000046947, ENSMUSG00000046378, ENSMUSG00000028708, ENSMUSG00000025613, ENSMUSG00000025486, ENSMUSG00000020124, ENSMUSG00000022263, ENSMUSG00000020905, ENSMUSG00000021116, ENSMUSG00000028309, ENSMUSG00000037805, ENSMUSG00000020258,…	1.53856	1.32763e-18	19.8769
GOTERM_BP_5	GO:0016070~RNA metabolic process	159	2.22258e-18	ENSMUSG00000029817, ENSMUSG00000032580, ENSMUSG00000064030, ENSMUSG00000053286, ENSMUSG00000043572, ENSMUSG00000031585, ENSMUSG00000028842, ENSMUSG00000028907, ENSMUSG00000026127, ENSMUSG00000029715, ENSMUSG00000040824, ENSMUSG00000035575, ENSMUSG00000025408, ENSMUSG00000034931, ENSMUSG00000028902, ENSMUSG00000002455, ENSMUSG00000071757, ENSMUSG00000021595, ENSMUSG00000038611, ENSMUSG00000003848,…	1.98352	3.78315e-15	16.4221
GOTERM_BP_5	GO:0006396~RNA processing	111	1.47017e-14	ENSMUSG00000029817, ENSMUSG00000032580, ENSMUSG00000053286, ENSMUSG00000028907, ENSMUSG00000026127, ENSMUSG00000040824, ENSMUSG00000029715, ENSMUSG00000035575, ENSMUSG00000034931, ENSMUSG00000028902, ENSMUSG00000002455, ENSMUSG00000021595, ENSMUSG00000038611, ENSMUSG00000003848, ENSMUSG00000020409, ENSMUSG00000029169, ENSMUSG00000037805, ENSMUSG00000022774, ENSMUSG00000038374, ENSMUSG00000028233,…	2.09767	2.49467e-11	12.603
GOTERM_BP_5	GO:0006457~protein folding	49	8.21429e-14	ENSMUSG00000019428, ENSMUSG00000003226, ENSMUSG00000021037, ENSMUSG00000030357, ENSMUSG00000015656, ENSMUSG00000009563, ENSMUSG00000028343, ENSMUSG00000056629, ENSMUSG00000039233, ENSMUSG00000025613, ENSMUSG00000025757, ENSMUSG00000024222, ENSMUSG00000021870, ENSMUSG00000042133, ENSMUSG00000031701, ENSMUSG00000024359, ENSMUSG00000004460, ENSMUSG00000026740, ENSMUSG00000021270, ENSMUSG00000020048,…	3.18632	1.39844e-10	11.8544
GOTERM_BP_5	GO:0016071~mRNA metabolic process	82	1.47238e-12	ENSMUSG00000029817, ENSMUSG00000040383, ENSMUSG00000028609, ENSMUSG00000032580, ENSMUSG00000060373, ENSMUSG00000064030, ENSMUSG00000022160, ENSMUSG00000028676, ENSMUSG00000028842, ENSMUSG00000040720, ENSMUSG00000040824, ENSMUSG00000023932, ENSMUSG00000004865, ENSMUSG00000059208, ENSMUSG00000005682, ENSMUSG00000034931, ENSMUSG00000059005, ENSMUSG00000016018, ENSMUSG00000002455, ENSMUSG00000028902,…	2.24235	2.5062e-09	10.601
GOTERM_BP_5	GO:0010468~regulation of gene expression	399	1.66036e-12	ENSMUSG00000026254, ENSMUSG00000063281, ENSMUSG00000018501, ENSMUSG00000038418, ENSMUSG00000021514, ENSMUSG00000061911, ENSMUSG00000001901, ENSMUSG00000028708, ENSMUSG00000029684, ENSMUSG00000025486, ENSMUSG00000021116, ENSMUSG00000046185, ENSMUSG00000025782, ENSMUSG00000072872, ENSMUSG00000013089, ENSMUSG00000033623, ENSMUSG00000037174, ENSMUSG00000020708, ENSMUSG00000006599, ENSMUSG00000021113,…	1.35657	2.82613e-09	10.5488
GOTERM_BP_5	GO:0031326~regulation of cellular biosynthetic process	401	6.92654e-12	ENSMUSG00000026254, ENSMUSG00000063281, ENSMUSG00000018501, ENSMUSG00000038418, ENSMUSG00000021514, ENSMUSG00000061911, ENSMUSG00000001901, ENSMUSG00000028708, ENSMUSG00000029684, ENSMUSG00000025486, ENSMUSG00000021116, ENSMUSG00000046185, ENSMUSG00000025782, ENSMUSG00000072872, ENSMUSG00000013089, ENSMUSG00000033623, ENSMUSG00000025889, ENSMUSG00000037174, ENSMUSG00000020708, ENSMUSG00000006599,…	1.34237	1.179e-08	9.92849
GOTERM_BP_5	GO:0010556~regulation of macromolecule biosynthetic process	389	8.07942e-12	ENSMUSG00000026254, ENSMUSG00000063281, ENSMUSG00000018501, ENSMUSG00000038418, ENSMUSG00000021514, ENSMUSG00000061911, ENSMUSG00000001901, ENSMUSG00000028708, ENSMUSG00000029684, ENSMUSG00000025486, ENSMUSG00000021116, ENSMUSG00000046185, ENSMUSG00000025782, ENSMUSG00000072872, ENSMUSG00000013089, ENSMUSG00000033623, ENSMUSG00000037174, ENSMUSG00000020708, ENSMUSG00000006599, ENSMUSG00000021113,…	1.34923	1.37523e-08	9.86162
GOTERM_BP_5	GO:0006397~mRNA processing	72	2.16242e-11	ENSMUSG00000029817, ENSMUSG00000028609, ENSMUSG00000040383, ENSMUSG00000032580, ENSMUSG00000060373, ENSMUSG00000028676, ENSMUSG00000040720, ENSMUSG00000040824, ENSMUSG00000023932, ENSMUSG00000004865, ENSMUSG00000059208, ENSMUSG00000005682, ENSMUSG00000034931, ENSMUSG00000059005, ENSMUSG00000016018, ENSMUSG00000002455, ENSMUSG00000028902, ENSMUSG00000060475, ENSMUSG00000033732, ENSMUSG00000038611,…	2.26949	3.68076e-08	9.43406
GOTERM_BP_5	GO:0008380~RNA splicing	60	3.35704e-11	ENSMUSG00000029817, ENSMUSG00000028609, ENSMUSG00000040383, ENSMUSG00000032580, ENSMUSG00000060373, ENSMUSG00000028676, ENSMUSG00000040720, ENSMUSG00000040824, ENSMUSG00000023932, ENSMUSG00000004865, ENSMUSG00000034931, ENSMUSG00000059208, ENSMUSG00000059005, ENSMUSG00000016018, ENSMUSG00000002455, ENSMUSG00000028902, ENSMUSG00000060475, ENSMUSG00000033732, ENSMUSG00000020409, ENSMUSG00000020180,…	2.4652	5.71415e-08	9.24305
GOTERM_BP_5	GO:0016568~chromatin modification	64	5.75277e-10	ENSMUSG00000031161, ENSMUSG00000029279, ENSMUSG00000049327, ENSMUSG00000042207, ENSMUSG00000015697, ENSMUSG00000018476, ENSMUSG00000031715, ENSMUSG00000018501, ENSMUSG00000024019, ENSMUSG00000040481, ENSMUSG00000018537, ENSMUSG00000024325, ENSMUSG00000031820, ENSMUSG00000029712, ENSMUSG00000032481, ENSMUSG00000031353, ENSMUSG00000000902, ENSMUSG00000030350, ENSMUSG00000032185, ENSMUSG00000025316,…	2.23957	9.79203e-07	8.00913
GOTERM_BP_5	GO:0019219~regulation of nucleobase, nucleoside, nucleotide and nucleic acid metabolic process	373	1.56037e-09	ENSMUSG00000063281, ENSMUSG00000063632, ENSMUSG00000018501, ENSMUSG00000038418, ENSMUSG00000070420, ENSMUSG00000021514, ENSMUSG00000061911, ENSMUSG00000001901, ENSMUSG00000021264, ENSMUSG00000029684, ENSMUSG00000025486, ENSMUSG00000022634, ENSMUSG00000046185, ENSMUSG00000072872, ENSMUSG00000025782, ENSMUSG00000013089, ENSMUSG00000033623, ENSMUSG00000051224, ENSMUSG00000009575, ENSMUSG00000027104,…	1.30913	2.65598e-06	7.57578
GOTERM_BP_5	GO:0045449~regulation of transcription	355	2.34615e-09	ENSMUSG00000063281, ENSMUSG00000063632, ENSMUSG00000018501, ENSMUSG00000038418, ENSMUSG00000070420, ENSMUSG00000021514, ENSMUSG00000061911, ENSMUSG00000001901, ENSMUSG00000021264, ENSMUSG00000029684, ENSMUSG00000025486, ENSMUSG00000022634, ENSMUSG00000046185, ENSMUSG00000025782, ENSMUSG00000072872, ENSMUSG00000013089, ENSMUSG00000033623, ENSMUSG00000051224, ENSMUSG00000009575, ENSMUSG00000027104,…	1.31645	3.99348e-06	7.39865
GOTERM_BP_5	GO:0044257~cellular protein catabolic process	110	2.09154e-08	ENSMUSG00000032307, ENSMUSG00000030451, ENSMUSG00000025103, ENSMUSG00000028703, ENSMUSG00000032905, ENSMUSG00000041773, ENSMUSG00000030319, ENSMUSG00000020124, ENSMUSG00000030314, ENSMUSG00000020905, ENSMUSG00000028309, ENSMUSG00000022443, ENSMUSG00000035299, ENSMUSG00000041180, ENSMUSG00000052833, ENSMUSG00000033364, ENSMUSG00000009630, ENSMUSG00000034377, ENSMUSG00000037463, ENSMUSG00000019969,…	1.69167	3.56009e-05	6.44854
GOTERM_BP_5	GO:0043632~modification-dependent macromolecule catabolic process	104	5.53142e-08	ENSMUSG00000032307, ENSMUSG00000030451, ENSMUSG00000025103, ENSMUSG00000028703, ENSMUSG00000032905, ENSMUSG00000041773, ENSMUSG00000030319, ENSMUSG00000020124, ENSMUSG00000030314, ENSMUSG00000020905, ENSMUSG00000028309, ENSMUSG00000035299, ENSMUSG00000041180, ENSMUSG00000052833, ENSMUSG00000033364, ENSMUSG00000009630, ENSMUSG00000034377, ENSMUSG00000037463, ENSMUSG00000024817, ENSMUSG00000020708,…	1.6907	9.41526e-05	6.02617
GOTERM_BP_5	GO:0030163~protein catabolic process	111	7.43768e-08	ENSMUSG00000032307, ENSMUSG00000030451, ENSMUSG00000025103, ENSMUSG00000028703, ENSMUSG00000032905, ENSMUSG00000041773, ENSMUSG00000030319, ENSMUSG00000020124, ENSMUSG00000030314, ENSMUSG00000020905, ENSMUSG00000028309, ENSMUSG00000022443, ENSMUSG00000035299, ENSMUSG00000041180, ENSMUSG00000052833, ENSMUSG00000033364, ENSMUSG00000009630, ENSMUSG00000034377, ENSMUSG00000037463, ENSMUSG00000019969,…	1.64871	0.0001266	5.89757
GOTERM_BP_5	GO:0015031~protein transport	120	1.70842e-06	ENSMUSG00000000131, ENSMUSG00000041670, ENSMUSG00000069631, ENSMUSG00000039367, ENSMUSG00000032504, ENSMUSG00000030082, ENSMUSG00000032042, ENSMUSG00000061455, ENSMUSG00000030314, ENSMUSG00000021124, ENSMUSG00000021062, ENSMUSG00000028975, ENSMUSG00000022443, ENSMUSG00000024789, ENSMUSG00000032264, ENSMUSG00000001855, ENSMUSG00000024359, ENSMUSG00000018965, ENSMUSG00000019969, ENSMUSG00000025188,…	1.52229	0.00290793	4.53642
GOTERM_BP_5	GO:0006464~protein modification process	206	2.37142e-06	ENSMUSG00000024360, ENSMUSG00000032501, ENSMUSG00000073563, ENSMUSG00000046947, ENSMUSG00000028708, ENSMUSG00000046378, ENSMUSG00000025486, ENSMUSG00000022263, ENSMUSG00000021116, ENSMUSG00000024789, ENSMUSG00000020258, ENSMUSG00000041180, ENSMUSG00000052833, ENSMUSG00000020601, ENSMUSG00000051590, ENSMUSG00000019969, ENSMUSG00000026064, ENSMUSG00000019960, ENSMUSG00000048371, ENSMUSG00000027303,…	1.35018	0.00403642	4.394
GOTERM_BP_5	GO:0010605~negative regulation of macromolecule metabolic process	97	3.47831e-06	ENSMUSG00000020472, ENSMUSG00000040761, ENSMUSG00000031715, ENSMUSG00000018501, ENSMUSG00000028842, ENSMUSG00000038418, ENSMUSG00000008976, ENSMUSG00000025486, ENSMUSG00000071757, ENSMUSG00000022634, ENSMUSG00000072872, ENSMUSG00000022774, ENSMUSG00000009575, ENSMUSG00000019969, ENSMUSG00000020708, ENSMUSG00000037364, ENSMUSG00000006127, ENSMUSG00000004099, ENSMUSG00000052684, ENSMUSG00000021149,…	1.58313	0.00592042	4.22765
GOTERM_BP_5	GO:0051169~nuclear transport	29	8.66324e-06	ENSMUSG00000000131, ENSMUSG00000040463, ENSMUSG00000069631, ENSMUSG00000055116, ENSMUSG00000028676, ENSMUSG00000020315, ENSMUSG00000027782, ENSMUSG00000034544, ENSMUSG00000057322, ENSMUSG00000038393, ENSMUSG00000022538, ENSMUSG00000016619, ENSMUSG00000024789, ENSMUSG00000022774, ENSMUSG00000009470, ENSMUSG00000080921, ENSMUSG00000028330, ENSMUSG00000024359, ENSMUSG00000001855, ENSMUSG00000021342,…	2.44382	0.014745	3.83135
GOTERM_BP_5	GO:0010629~negative regulation of gene expression	80	1.45867e-05	ENSMUSG00000029478, ENSMUSG00000020472, ENSMUSG00000040761, ENSMUSG00000003032, ENSMUSG00000018476, ENSMUSG00000031167, ENSMUSG00000008730, ENSMUSG00000037235, ENSMUSG00000031715, ENSMUSG00000018501, ENSMUSG00000028842, ENSMUSG00000038418, ENSMUSG00000040481, ENSMUSG00000037992, ENSMUSG00000018537, ENSMUSG00000032402, ENSMUSG00000008976, ENSMUSG00000031609, ENSMUSG00000025486, ENSMUSG00000071757,…	1.6114	0.0248258	3.6051
GOTERM_BP_5	GO:0031327~negative regulation of cellular biosynthetic process	83	1.50075e-05	ENSMUSG00000029478, ENSMUSG00000020472, ENSMUSG00000040761, ENSMUSG00000003032, ENSMUSG00000018476, ENSMUSG00000008730, ENSMUSG00000037235, ENSMUSG00000031715, ENSMUSG00000018501, ENSMUSG00000028842, ENSMUSG00000038418, ENSMUSG00000021367, ENSMUSG00000040481, ENSMUSG00000037992, ENSMUSG00000018537, ENSMUSG00000045294, ENSMUSG00000032402, ENSMUSG00000035914, ENSMUSG00000008976, ENSMUSG00000031609,…	1.59407	0.0255418	3.59275
GOTERM_BP_5	GO:0006913~nucleocytoplasmic transport	28	1.71092e-05	ENSMUSG00000000131, ENSMUSG00000040463, ENSMUSG00000069631, ENSMUSG00000055116, ENSMUSG00000028676, ENSMUSG00000020315, ENSMUSG00000027782, ENSMUSG00000034544, ENSMUSG00000057322, ENSMUSG00000038393, ENSMUSG00000022538, ENSMUSG00000016619, ENSMUSG00000024789, ENSMUSG00000022774, ENSMUSG00000009470, ENSMUSG00000080921, ENSMUSG00000028330, ENSMUSG00000024359, ENSMUSG00000001855, ENSMUSG00000021342,…	2.4087	0.0291182	3.53584
GOTERM_BP_5	GO:0009890~negative regulation of biosynthetic process	83	2.12871e-05	ENSMUSG00000029478, ENSMUSG00000020472, ENSMUSG00000040761, ENSMUSG00000003032, ENSMUSG00000018476, ENSMUSG00000008730, ENSMUSG00000037235, ENSMUSG00000031715, ENSMUSG00000018501, ENSMUSG00000028842, ENSMUSG00000038418, ENSMUSG00000021367, ENSMUSG00000040481, ENSMUSG00000037992, ENSMUSG00000018537, ENSMUSG00000045294, ENSMUSG00000032402, ENSMUSG00000035914, ENSMUSG00000008976, ENSMUSG00000031609,…	1.57937	0.0362274	3.44096
GOTERM_BP_5	GO:0031324~negative regulation of cellular metabolic process	91	2.44063e-05	ENSMUSG00000029478, ENSMUSG00000005370, ENSMUSG00000020472, ENSMUSG00000040761, ENSMUSG00000003032, ENSMUSG00000018476, ENSMUSG00000020849, ENSMUSG00000008730, ENSMUSG00000037235, ENSMUSG00000028676, ENSMUSG00000018501, ENSMUSG00000031715, ENSMUSG00000028842, ENSMUSG00000038418, ENSMUSG00000021367, ENSMUSG00000040481, ENSMUSG00000037992, ENSMUSG00000004768, ENSMUSG00000018537, ENSMUSG00000032402,…	1.53684	0.0415348	3.38159
GOTERM_BP_5	GO:0006412~translation	64	5.01882e-05	ENSMUSG00000025967, ENSMUSG00000024360, ENSMUSG00000026254, ENSMUSG00000030738, ENSMUSG00000019774, ENSMUSG00000006941, ENSMUSG00000031167, ENSMUSG00000071415, ENSMUSG00000043572, ENSMUSG00000062997, ENSMUSG00000074656, ENSMUSG00000005610, ENSMUSG00000059291, ENSMUSG00000039804, ENSMUSG00000027613, ENSMUSG00000057561, ENSMUSG00000021967, ENSMUSG00000030083, ENSMUSG00000022601, ENSMUSG00000001707,…	1.65686	0.085393	3.06858
GOTERM_BP_5	GO:0010558~negative regulation of macromolecule biosynthetic process	79	5.22959e-05	ENSMUSG00000029478, ENSMUSG00000020472, ENSMUSG00000040761, ENSMUSG00000003032, ENSMUSG00000018476, ENSMUSG00000008730, ENSMUSG00000037235, ENSMUSG00000031715, ENSMUSG00000018501, ENSMUSG00000028842, ENSMUSG00000038418, ENSMUSG00000040481, ENSMUSG00000037992, ENSMUSG00000018537, ENSMUSG00000032402, ENSMUSG00000035914, ENSMUSG00000008976, ENSMUSG00000031609, ENSMUSG00000025486, ENSMUSG00000071757,…	1.5608	0.0889777	3.05072
GOTERM_BP_5	GO:0010608~posttranscriptional regulation of gene expression	36	6.34874e-05	ENSMUSG00000028609, ENSMUSG00000026254, ENSMUSG00000021149, ENSMUSG00000031167, ENSMUSG00000064030, ENSMUSG00000028842, ENSMUSG00000005610, ENSMUSG00000009549, ENSMUSG00000023951, ENSMUSG00000028708, ENSMUSG00000031668, ENSMUSG00000053565, ENSMUSG00000002731, ENSMUSG00000020594, ENSMUSG00000027002, ENSMUSG00000021116, ENSMUSG00000031490, ENSMUSG00000027810, ENSMUSG00000034617, ENSMUSG00000022892,…	2.0088	0.10801	2.96654
GOTERM_BP_5	GO:0045934~negative regulation of nucleobase, nucleoside, nucleotide and nucleic acid metabolic process	75	8.38127e-05	ENSMUSG00000029478, ENSMUSG00000005370, ENSMUSG00000020472, ENSMUSG00000040761, ENSMUSG00000003032, ENSMUSG00000018476, ENSMUSG00000008730, ENSMUSG00000037235, ENSMUSG00000031715, ENSMUSG00000028676, ENSMUSG00000018501, ENSMUSG00000038418, ENSMUSG00000021367, ENSMUSG00000040481, ENSMUSG00000037992, ENSMUSG00000018537, ENSMUSG00000032402, ENSMUSG00000008976, ENSMUSG00000031609, ENSMUSG00000025486,…	1.56015	0.142565	2.84599
GOTERM_BP_5	GO:0006605~protein targeting	33	9.07872e-05	ENSMUSG00000029198, ENSMUSG00000000131, ENSMUSG00000021686, ENSMUSG00000069631, ENSMUSG00000055116, ENSMUSG00000020849, ENSMUSG00000009549, ENSMUSG00000002984, ENSMUSG00000027828, ENSMUSG00000067279, ENSMUSG00000051391, ENSMUSG00000032042, ENSMUSG00000020315, ENSMUSG00000027782, ENSMUSG00000024847, ENSMUSG00000022285, ENSMUSG00000038393, ENSMUSG00000057322, ENSMUSG00000024789, ENSMUSG00000026280,…	2.04908	0.15442	2.8113
GOTERM_BP_5	GO:0051172~negative regulation of nitrogen compound metabolic process	75	0.000117779	ENSMUSG00000029478, ENSMUSG00000005370, ENSMUSG00000020472, ENSMUSG00000040761, ENSMUSG00000003032, ENSMUSG00000018476, ENSMUSG00000008730, ENSMUSG00000037235, ENSMUSG00000031715, ENSMUSG00000028676, ENSMUSG00000018501, ENSMUSG00000038418, ENSMUSG00000021367, ENSMUSG00000040481, ENSMUSG00000037992, ENSMUSG00000018537, ENSMUSG00000032402, ENSMUSG00000008976, ENSMUSG00000031609, ENSMUSG00000025486,…	1.54459	0.200287	2.69835
GOTERM_BP_5	GO:0051246~regulation of protein metabolic process	67	0.000153635	ENSMUSG00000032307, ENSMUSG00000026254, ENSMUSG00000028609, ENSMUSG00000064030, ENSMUSG00000020849, ENSMUSG00000032601, ENSMUSG00000018501, ENSMUSG00000028842, ENSMUSG00000021457, ENSMUSG00000000489, ENSMUSG00000005610, ENSMUSG00000004768, ENSMUSG00000009293, ENSMUSG00000028708, ENSMUSG00000044716, ENSMUSG00000030314, ENSMUSG00000021116, ENSMUSG00000031490, ENSMUSG00000054051, ENSMUSG00000054387,…	1.57639	0.261187	2.58305
GOTERM_BP_5	GO:0033365~protein localization in organelle	26	0.000164101	ENSMUSG00000078970, ENSMUSG00000029198, ENSMUSG00000000131, ENSMUSG00000055116, ENSMUSG00000009549, ENSMUSG00000002984, ENSMUSG00000033953, ENSMUSG00000032042, ENSMUSG00000020315, ENSMUSG00000027782, ENSMUSG00000024847, ENSMUSG00000057322, ENSMUSG00000038393, ENSMUSG00000024789, ENSMUSG00000064068, ENSMUSG00000009470, ENSMUSG00000039456, ENSMUSG00000080921, ENSMUSG00000001855, ENSMUSG00000021342,…	2.21359	0.278956	2.55446
GOTERM_BP_5	GO:0008286~insulin receptor signaling pathway	12	0.000236032	ENSMUSG00000037112, ENSMUSG00000026791, ENSMUSG00000031490, ENSMUSG00000027540, ENSMUSG00000038894, ENSMUSG00000024539, ENSMUSG00000027288, ENSMUSG00000038485, ENSMUSG00000042903, ENSMUSG00000032253, ENSMUSG00000005534, ENSMUSG00000027303	3.53932	0.401001	2.39685
GOTERM_BP_5	GO:0032268~regulation of cellular protein metabolic process	55	0.000314645	ENSMUSG00000026254, ENSMUSG00000028609, ENSMUSG00000064030, ENSMUSG00000020849, ENSMUSG00000032601, ENSMUSG00000018501, ENSMUSG00000028842, ENSMUSG00000021457, ENSMUSG00000000489, ENSMUSG00000005610, ENSMUSG00000004768, ENSMUSG00000028708, ENSMUSG00000044716, ENSMUSG00000030314, ENSMUSG00000021116, ENSMUSG00000031490, ENSMUSG00000054051, ENSMUSG00000024789, ENSMUSG00000022774, ENSMUSG00000027680,…	1.62219	0.534223	2.27228
GOTERM_BP_5	GO:0016310~phosphorylation	118	0.000377567	ENSMUSG00000009828, ENSMUSG00000025060, ENSMUSG00000069631, ENSMUSG00000030647, ENSMUSG00000034761, ENSMUSG00000021457, ENSMUSG00000032501, ENSMUSG00000073563, ENSMUSG00000046947, ENSMUSG00000028708, ENSMUSG00000033379, ENSMUSG00000022263, ENSMUSG00000021116, ENSMUSG00000028062, ENSMUSG00000024789, ENSMUSG00000020258, ENSMUSG00000005469, ENSMUSG00000060733, ENSMUSG00000068706, ENSMUSG00000025889,…	1.35723	0.640732	2.19332
GOTERM_BP_5	GO:0006886~intracellular protein transport	54	0.000396787	ENSMUSG00000000131, ENSMUSG00000041670, ENSMUSG00000069631, ENSMUSG00000025142, ENSMUSG00000039367, ENSMUSG00000020849, ENSMUSG00000026577, ENSMUSG00000027828, ENSMUSG00000030082, ENSMUSG00000032042, ENSMUSG00000061455, ENSMUSG00000021124, ENSMUSG00000030805, ENSMUSG00000024789, ENSMUSG00000029125, ENSMUSG00000009470, ENSMUSG00000024359, ENSMUSG00000001855, ENSMUSG00000018965, ENSMUSG00000021342,…	1.61578	0.673246	2.17183
GOTERM_BP_5	GO:0016481~negative regulation of transcription	68	0.000476939	ENSMUSG00000029478, ENSMUSG00000020472, ENSMUSG00000040761, ENSMUSG00000003032, ENSMUSG00000018476, ENSMUSG00000008730, ENSMUSG00000037235, ENSMUSG00000031715, ENSMUSG00000018501, ENSMUSG00000038418, ENSMUSG00000040481, ENSMUSG00000037992, ENSMUSG00000018537, ENSMUSG00000032402, ENSMUSG00000008976, ENSMUSG00000031609, ENSMUSG00000025486, ENSMUSG00000071757, ENSMUSG00000031353, ENSMUSG00000022361,…	1.5096	0.808724	2.0922
GOTERM_BP_5	GO:0007167~enzyme linked receptor protein signaling pathway	53	0.000546633	ENSMUSG00000023266, ENSMUSG00000029071, ENSMUSG00000032253, ENSMUSG00000021457, ENSMUSG00000000489, ENSMUSG00000028907, ENSMUSG00000031010, ENSMUSG00000032402, ENSMUSG00000028289, ENSMUSG00000027297, ENSMUSG00000036867, ENSMUSG00000044716, ENSMUSG00000029648, ENSMUSG00000027316, ENSMUSG00000031490, ENSMUSG00000027540, ENSMUSG00000024789, ENSMUSG00000031555, ENSMUSG00000021974, ENSMUSG00000037013,…	1.60328	0.926384	2.03321
GOTERM_BP_5	GO:0050657~nucleic acid transport	19	0.000630374	ENSMUSG00000003226, ENSMUSG00000016619, ENSMUSG00000028609, ENSMUSG00000022774, ENSMUSG00000038374, ENSMUSG00000029405, ENSMUSG00000028676, ENSMUSG00000028330, ENSMUSG00000001855, ENSMUSG00000026491, ENSMUSG00000010097, ENSMUSG00000040594, ENSMUSG00000000838, ENSMUSG00000004980, ENSMUSG00000078676, ENSMUSG00000048439, ENSMUSG00000063895, ENSMUSG00000046434, ENSMUSG00000020290	2.37742	1.06758	1.9716
GOTERM_BP_5	GO:0050658~RNA transport	19	0.000630374	ENSMUSG00000003226, ENSMUSG00000016619, ENSMUSG00000028609, ENSMUSG00000022774, ENSMUSG00000038374, ENSMUSG00000029405, ENSMUSG00000028676, ENSMUSG00000028330, ENSMUSG00000001855, ENSMUSG00000026491, ENSMUSG00000010097, ENSMUSG00000040594, ENSMUSG00000000838, ENSMUSG00000004980, ENSMUSG00000078676, ENSMUSG00000048439, ENSMUSG00000063895, ENSMUSG00000046434, ENSMUSG00000020290	2.37742	1.06758	1.9716
GOTERM_BP_5	GO:0006417~regulation of translation	25	0.000683295	ENSMUSG00000021116, ENSMUSG00000031490, ENSMUSG00000027810, ENSMUSG00000028609, ENSMUSG00000026254, ENSMUSG00000022892, ENSMUSG00000042500, ENSMUSG00000064030, ENSMUSG00000046062, ENSMUSG00000022774, ENSMUSG00000027680, ENSMUSG00000038374, ENSMUSG00000028330, ENSMUSG00000028842, ENSMUSG00000045983, ENSMUSG00000005610, ENSMUSG00000009549, ENSMUSG00000026740, ENSMUSG00000028708, ENSMUSG00000031668,…	2.0646	1.15672	1.93677
GOTERM_BP_5	GO:0051028~mRNA transport	18	0.000826704	ENSMUSG00000003226, ENSMUSG00000016619, ENSMUSG00000028609, ENSMUSG00000022774, ENSMUSG00000038374, ENSMUSG00000029405, ENSMUSG00000028676, ENSMUSG00000028330, ENSMUSG00000001855, ENSMUSG00000026491, ENSMUSG00000010097, ENSMUSG00000040594, ENSMUSG00000000838, ENSMUSG00000078676, ENSMUSG00000048439, ENSMUSG00000063895, ENSMUSG00000046434, ENSMUSG00000020290	2.3976	1.39789	1.85453
GOTERM_BP_5	GO:0010565~regulation of cellular ketone metabolic process	10	0.000906199	ENSMUSG00000020538, ENSMUSG00000025889, ENSMUSG00000074064, ENSMUSG00000041798, ENSMUSG00000045294, ENSMUSG00000031668, ENSMUSG00000003721, ENSMUSG00000007827, ENSMUSG00000032485, ENSMUSG00000031278	3.59061	1.53133	1.81493
GOTERM_BP_5	GO:0019217~regulation of fatty acid metabolic process	9	0.000993392	ENSMUSG00000020538, ENSMUSG00000025889, ENSMUSG00000074064, ENSMUSG00000045294, ENSMUSG00000031668, ENSMUSG00000003721, ENSMUSG00000007827, ENSMUSG00000032485, ENSMUSG00000031278	3.91188	1.6775	1.77534
GOTERM_BP_5	GO:0034660~ncRNA metabolic process	41	0.0010626	ENSMUSG00000060152, ENSMUSG00000026615, ENSMUSG00000024587, ENSMUSG00000079470, ENSMUSG00000030521, ENSMUSG00000031403, ENSMUSG00000025047, ENSMUSG00000018068, ENSMUSG00000031527, ENSMUSG00000043572, ENSMUSG00000053286, ENSMUSG00000028907, ENSMUSG00000028729, ENSMUSG00000026127, ENSMUSG00000028322, ENSMUSG00000029715, ENSMUSG00000029547, ENSMUSG00000051557, ENSMUSG00000035575, ENSMUSG00000022241,…	1.67621	1.79338	1.74633
GOTERM_BP_5	GO:0034470~ncRNA processing	34	0.00111036	ENSMUSG00000060152, ENSMUSG00000079470, ENSMUSG00000030521, ENSMUSG00000031403, ENSMUSG00000025047, ENSMUSG00000018068, ENSMUSG00000031527, ENSMUSG00000053286, ENSMUSG00000028907, ENSMUSG00000028729, ENSMUSG00000026127, ENSMUSG00000028322, ENSMUSG00000029715, ENSMUSG00000029547, ENSMUSG00000035575, ENSMUSG00000051557, ENSMUSG00000069020, ENSMUSG00000039826, ENSMUSG00000021595, ENSMUSG00000026019,…	1.77713	1.87328	1.7274
GOTERM_BP_5	GO:0051253~negative regulation of RNA metabolic process	57	0.00128496	ENSMUSG00000029478, ENSMUSG00000020472, ENSMUSG00000040761, ENSMUSG00000003032, ENSMUSG00000018476, ENSMUSG00000008730, ENSMUSG00000031715, ENSMUSG00000028676, ENSMUSG00000018501, ENSMUSG00000038418, ENSMUSG00000040481, ENSMUSG00000037992, ENSMUSG00000032402, ENSMUSG00000018537, ENSMUSG00000008976, ENSMUSG00000031609, ENSMUSG00000025486, ENSMUSG00000071757, ENSMUSG00000031353, ENSMUSG00000022361,…	1.51848	2.16482	1.66458
GOTERM_BP_5	GO:0032868~response to insulin stimulus	17	0.00132374	ENSMUSG00000037112, ENSMUSG00000031490, ENSMUSG00000026791, ENSMUSG00000027540, ENSMUSG00000019699, ENSMUSG00000032253, ENSMUSG00000038485, ENSMUSG00000005534, ENSMUSG00000037868, ENSMUSG00000038894, ENSMUSG00000024539, ENSMUSG00000027288, ENSMUSG00000042903, ENSMUSG00000031808, ENSMUSG00000032485, ENSMUSG00000027303, ENSMUSG00000006127	2.37954	2.22945	1.6518
GOTERM_BP_5	GO:0045892~negative regulation of transcription, DNA-dependent	56	0.00184771	ENSMUSG00000029478, ENSMUSG00000020472, ENSMUSG00000040761, ENSMUSG00000003032, ENSMUSG00000018476, ENSMUSG00000008730, ENSMUSG00000031715, ENSMUSG00000018501, ENSMUSG00000038418, ENSMUSG00000040481, ENSMUSG00000037992, ENSMUSG00000032402, ENSMUSG00000018537, ENSMUSG00000008976, ENSMUSG00000031609, ENSMUSG00000025486, ENSMUSG00000071757, ENSMUSG00000031353, ENSMUSG00000022361, ENSMUSG00000054387,…	1.50153	3.09894	1.50879
GOTERM_BP_5	GO:0006606~protein import into nucleus	16	0.00211746	ENSMUSG00000057322, ENSMUSG00000038393, ENSMUSG00000000131, ENSMUSG00000024789, ENSMUSG00000055116, ENSMUSG00000009470, ENSMUSG00000080921, ENSMUSG00000001855, ENSMUSG00000021342, ENSMUSG00000021253, ENSMUSG00000040594, ENSMUSG00000021974, ENSMUSG00000006005, ENSMUSG00000020315, ENSMUSG00000066232, ENSMUSG00000027782, ENSMUSG00000020290	2.35955	3.54372	1.45054
GOTERM_BP_5	GO:0016458~gene silencing	16	0.0025584	ENSMUSG00000020661, ENSMUSG00000004099, ENSMUSG00000042500, ENSMUSG00000031167, ENSMUSG00000022718, ENSMUSG00000022774, ENSMUSG00000054021, ENSMUSG00000031527, ENSMUSG00000031715, ENSMUSG00000028330, ENSMUSG00000028842, ENSMUSG00000070697, ENSMUSG00000037364, ENSMUSG00000025486, ENSMUSG00000002731, ENSMUSG00000047888	2.31815	4.26665	1.36991
GOTERM_BP_5	GO:0043549~regulation of kinase activity	38	0.00263116	ENSMUSG00000037211, ENSMUSG00000021149, ENSMUSG00000009073, ENSMUSG00000069631, ENSMUSG00000021457, ENSMUSG00000021367, ENSMUSG00000025422, ENSMUSG00000071369, ENSMUSG00000040687, ENSMUSG00000032501, ENSMUSG00000027177, ENSMUSG00000045671, ENSMUSG00000023067, ENSMUSG00000048878, ENSMUSG00000022414, ENSMUSG00000060477, ENSMUSG00000030983, ENSMUSG00000024427, ENSMUSG00000004815, ENSMUSG00000054051,…	1.63448	4.38545	1.35799
GOTERM_BP_5	GO:0007242~intracellular signaling cascade	139	0.00298146	ENSMUSG00000031442, ENSMUSG00000009828, ENSMUSG00000030733, ENSMUSG00000034761, ENSMUSG00000021457, ENSMUSG00000020888, ENSMUSG00000035109, ENSMUSG00000022957, ENSMUSG00000028708, ENSMUSG00000026430, ENSMUSG00000022263, ENSMUSG00000038611, ENSMUSG00000004815, ENSMUSG00000031511, ENSMUSG00000021062, ENSMUSG00000028062, ENSMUSG00000024789, ENSMUSG00000030265, ENSMUSG00000027500, ENSMUSG00000036894,…	1.25456	4.95544	1.30492
GOTERM_BP_5	GO:0051348~negative regulation of transferase activity	15	0.00338303	ENSMUSG00000037211, ENSMUSG00000009073, ENSMUSG00000022136, ENSMUSG00000022114, ENSMUSG00000021670, ENSMUSG00000027351, ENSMUSG00000027177, ENSMUSG00000021959, ENSMUSG00000019969, ENSMUSG00000045671, ENSMUSG00000023067, ENSMUSG00000048878, ENSMUSG00000021892, ENSMUSG00000024975, ENSMUSG00000024427	2.33729	5.60495	1.25143
GOTERM_BP_5	GO:0017038~protein import	20	0.00362738	ENSMUSG00000038393, ENSMUSG00000057322, ENSMUSG00000029198, ENSMUSG00000000131, ENSMUSG00000024789, ENSMUSG00000055116, ENSMUSG00000064068, ENSMUSG00000009470, ENSMUSG00000080921, ENSMUSG00000001855, ENSMUSG00000021342, ENSMUSG00000002984, ENSMUSG00000040594, ENSMUSG00000021253, ENSMUSG00000021974, ENSMUSG00000006005, ENSMUSG00000020315, ENSMUSG00000066232, ENSMUSG00000027782, ENSMUSG00000024847,…	2.01425	5.99812	1.22199
GOTERM_BP_5	GO:0007041~lysosomal transport	7	0.00393503	ENSMUSG00000021686, ENSMUSG00000002395, ENSMUSG00000037234, ENSMUSG00000028419, ENSMUSG00000026024, ENSMUSG00000044465, ENSMUSG00000035521	4.12921	6.49095	1.18769
GOTERM_BP_5	GO:0032869~cellular response to insulin stimulus	13	0.00398024	ENSMUSG00000037112, ENSMUSG00000031490, ENSMUSG00000026791, ENSMUSG00000027540, ENSMUSG00000019699, ENSMUSG00000032253, ENSMUSG00000038485, ENSMUSG00000005534, ENSMUSG00000038894, ENSMUSG00000024539, ENSMUSG00000027288, ENSMUSG00000042903, ENSMUSG00000027303	2.49673	6.56316	1.18289
GOTERM_BP_5	GO:0007219~Notch signaling pathway	15	0.00406906	ENSMUSG00000052593, ENSMUSG00000039982, ENSMUSG00000024294, ENSMUSG00000040415, ENSMUSG00000015750, ENSMUSG00000022892, ENSMUSG00000040761, ENSMUSG00000001300, ENSMUSG00000028086, ENSMUSG00000019789, ENSMUSG00000054693, ENSMUSG00000019969, ENSMUSG00000020964, ENSMUSG00000026019, ENSMUSG00000032744	2.294	6.70489	1.17361
GOTERM_BP_5	GO:0032774~RNA biosynthetic process	27	0.00421044	ENSMUSG00000043962, ENSMUSG00000033543, ENSMUSG00000024613, ENSMUSG00000031585, ENSMUSG00000025019, ENSMUSG00000047649, ENSMUSG00000032402, ENSMUSG00000025408, ENSMUSG00000039117, ENSMUSG00000038611, ENSMUSG00000029833, ENSMUSG00000048100, ENSMUSG00000025782, ENSMUSG00000028899, ENSMUSG00000027395, ENSMUSG00000054321, ENSMUSG00000078941, ENSMUSG00000000776, ENSMUSG00000038225, ENSMUSG00000059540,…	1.76966	6.93006	1.15926
GOTERM_BP_5	GO:0006259~DNA metabolic process	70	0.00492332	ENSMUSG00000005370, ENSMUSG00000025060, ENSMUSG00000034575, ENSMUSG00000040174, ENSMUSG00000000489, ENSMUSG00000031583, ENSMUSG00000024019, ENSMUSG00000040681, ENSMUSG00000021668, ENSMUSG00000031820, ENSMUSG00000033970, ENSMUSG00000020038, ENSMUSG00000025209, ENSMUSG00000036932, ENSMUSG00000002109, ENSMUSG00000031353, ENSMUSG00000001707, ENSMUSG00000030983, ENSMUSG00000024293, ENSMUSG00000062270,…	1.37313	8.05769	1.09379
GOTERM_BP_5	GO:0006351~transcription, DNA-dependent	26	0.00543197	ENSMUSG00000043962, ENSMUSG00000048100, ENSMUSG00000025782, ENSMUSG00000027395, ENSMUSG00000028899, ENSMUSG00000033543, ENSMUSG00000054321, ENSMUSG00000024613, ENSMUSG00000031585, ENSMUSG00000078941, ENSMUSG00000000776, ENSMUSG00000025019, ENSMUSG00000047649, ENSMUSG00000032402, ENSMUSG00000025408, ENSMUSG00000039117, ENSMUSG00000059540, ENSMUSG00000004040, ENSMUSG00000038611, ENSMUSG00000018160,…	1.75999	8.8544	1.05284
GOTERM_BP_5	GO:0006281~DNA repair	41	0.00617396	ENSMUSG00000005370, ENSMUSG00000049717, ENSMUSG00000025060, ENSMUSG00000052139, ENSMUSG00000041133, ENSMUSG00000040174, ENSMUSG00000030528, ENSMUSG00000031583, ENSMUSG00000079109, ENSMUSG00000022248, ENSMUSG00000024019, ENSMUSG00000040681, ENSMUSG00000055401, ENSMUSG00000028820, ENSMUSG00000021668, ENSMUSG00000035726, ENSMUSG00000031820, ENSMUSG00000020038, ENSMUSG00000021287, ENSMUSG00000002109,…	1.5252	10.0049
GOTERM_BP_5	GO:0040029~regulation of gene expression, epigenetic	17	0.00831713	ENSMUSG00000002028, ENSMUSG00000020661, ENSMUSG00000004099, ENSMUSG00000042500, ENSMUSG00000031167, ENSMUSG00000022718, ENSMUSG00000079184, ENSMUSG00000054021, ENSMUSG00000031715, ENSMUSG00000028842, ENSMUSG00000024054, ENSMUSG00000027953, ENSMUSG00000005698, ENSMUSG00000037364, ENSMUSG00000025486, ENSMUSG00000002731, ENSMUSG00000030619	2.00561	13.2519
GOTERM_BP_5	GO:0006983~ER overload response	5	0.0099909	ENSMUSG00000025408, ENSMUSG00000031668, ENSMUSG00000046062, ENSMUSG00000078622, ENSMUSG00000026864	5.16151	15.7106
GOTERM_BP_5	GO:0006333~chromatin assembly or disassembly	23	0.0104492	ENSMUSG00000002748, ENSMUSG00000056216, ENSMUSG00000062270, ENSMUSG00000082229, ENSMUSG00000048118, ENSMUSG00000018474, ENSMUSG00000063870, ENSMUSG00000079184, ENSMUSG00000031715, ENSMUSG00000018666, ENSMUSG00000016559, ENSMUSG00000009575, ENSMUSG00000024921, ENSMUSG00000054766, ENSMUSG00000056608, ENSMUSG00000031758, ENSMUSG00000005045, ENSMUSG00000029712, ENSMUSG00000060032, ENSMUSG00000068855,…	1.7426	16.3724
GOTERM_BP_5	GO:0051174~regulation of phosphorus metabolic process	51	0.0119762	ENSMUSG00000069631, ENSMUSG00000032601, ENSMUSG00000020849, ENSMUSG00000021457, ENSMUSG00000000489, ENSMUSG00000021367, ENSMUSG00000040687, ENSMUSG00000032501, ENSMUSG00000044716, ENSMUSG00000023067, ENSMUSG00000060477, ENSMUSG00000030983, ENSMUSG00000024427, ENSMUSG00000004815, ENSMUSG00000054051, ENSMUSG00000028062, ENSMUSG00000024789, ENSMUSG00000022114, ENSMUSG00000027351, ENSMUSG00000021670,…	1.39927	18.542
GOTERM_BP_5	GO:0019220~regulation of phosphate metabolic process	51	0.0119762	ENSMUSG00000069631, ENSMUSG00000032601, ENSMUSG00000020849, ENSMUSG00000021457, ENSMUSG00000000489, ENSMUSG00000021367, ENSMUSG00000040687, ENSMUSG00000032501, ENSMUSG00000044716, ENSMUSG00000023067, ENSMUSG00000060477, ENSMUSG00000030983, ENSMUSG00000024427, ENSMUSG00000004815, ENSMUSG00000054051, ENSMUSG00000028062, ENSMUSG00000024789, ENSMUSG00000022114, ENSMUSG00000027351, ENSMUSG00000021670,…	1.39927	18.542
GOTERM_BP_5	GO:0051329~interphase of mitotic cell cycle	13	0.0120949	ENSMUSG00000029014, ENSMUSG00000057469, ENSMUSG00000000184, ENSMUSG00000022892, ENSMUSG00000021959, ENSMUSG00000040957, ENSMUSG00000025809, ENSMUSG00000057329, ENSMUSG00000042903, ENSMUSG00000006678, ENSMUSG00000020167, ENSMUSG00000020184, ENSMUSG00000026605	2.19101	18.7085
GOTERM_BP_5	GO:0045454~cell redox homeostasis	15	0.0145394	ENSMUSG00000000811, ENSMUSG00000028343, ENSMUSG00000025823, ENSMUSG00000025130, ENSMUSG00000024997, ENSMUSG00000058709, ENSMUSG00000025408, ENSMUSG00000002580, ENSMUSG00000020571, ENSMUSG00000021591, ENSMUSG00000036932, ENSMUSG00000031068, ENSMUSG00000027248, ENSMUSG00000020664, ENSMUSG00000033684	1.998	22.0652
GOTERM_BP_5	GO:0009452~RNA capping	4	0.0146373	ENSMUSG00000028274, ENSMUSG00000022774, ENSMUSG00000028330, ENSMUSG00000028233	6.60673	22.1969
GOTERM_BP_5	GO:0007034~vacuolar transport	8	0.015909	ENSMUSG00000026280, ENSMUSG00000021686, ENSMUSG00000002395, ENSMUSG00000037234, ENSMUSG00000028419, ENSMUSG00000026024, ENSMUSG00000044465, ENSMUSG00000035521	2.87249	23.8885
GOTERM_BP_5	GO:0050684~regulation of mRNA processing	5	0.0162783	ENSMUSG00000004865, ENSMUSG00000032580, ENSMUSG00000028330, ENSMUSG00000028676, ENSMUSG00000074102	4.58801	24.3733
GOTERM_BP_5	GO:0051325~interphase	13	0.0165948	ENSMUSG00000029014, ENSMUSG00000057469, ENSMUSG00000000184, ENSMUSG00000022892, ENSMUSG00000021959, ENSMUSG00000040957, ENSMUSG00000025809, ENSMUSG00000057329, ENSMUSG00000042903, ENSMUSG00000006678, ENSMUSG00000020167, ENSMUSG00000020184, ENSMUSG00000026605	2.10509	24.7864
GOTERM_BP_5	GO:0042770~DNA damage response, signal transduction	14	0.0167435	ENSMUSG00000005370, ENSMUSG00000030717, ENSMUSG00000054051, ENSMUSG00000052139, ENSMUSG00000008730, ENSMUSG00000041133, ENSMUSG00000034485, ENSMUSG00000053436, ENSMUSG00000041147, ENSMUSG00000002083, ENSMUSG00000031820, ENSMUSG00000028630, ENSMUSG00000042903, ENSMUSG00000041801	2.02838	24.9797
PANTHER_BP_ALL	BP00031:Nucleoside, nucleotide and nucleic acid metabolism	453	6.9704e-16	ENSMUSG00000018199, ENSMUSG00000063281, ENSMUSG00000053289, ENSMUSG00000043572, ENSMUSG00000053286, ENSMUSG00000018501, ENSMUSG00000038418, ENSMUSG00000028907, ENSMUSG00000073563, ENSMUSG00000021514, ENSMUSG00000026199, ENSMUSG00000061911, ENSMUSG00000040824, ENSMUSG00000026192, ENSMUSG00000028902, ENSMUSG00000042308, ENSMUSG00000025209, ENSMUSG00000025486, ENSMUSG00000006395, ENSMUSG00000041477,…	1.38748	8.43769e-13	14.0738
PANTHER_BP_ALL	BP00062:Protein folding	49	3.77534e-13	ENSMUSG00000019428, ENSMUSG00000021037, ENSMUSG00000030357, ENSMUSG00000015656, ENSMUSG00000056629, ENSMUSG00000025613, ENSMUSG00000025757, ENSMUSG00000024222, ENSMUSG00000042133, ENSMUSG00000031701, ENSMUSG00000024359, ENSMUSG00000004460, ENSMUSG00000035759, ENSMUSG00000022403, ENSMUSG00000024780, ENSMUSG00000026740, ENSMUSG00000019471, ENSMUSG00000021270, ENSMUSG00000020048, ENSMUSG00000006412,…	3.13445	4.79228e-10	11.3195
PANTHER_BP_ALL	BP00047:Pre-mRNA processing	60	5.66766e-08	ENSMUSG00000029817, ENSMUSG00000060373, ENSMUSG00000022160, ENSMUSG00000028676, ENSMUSG00000037993, ENSMUSG00000031822, ENSMUSG00000040824, ENSMUSG00000034931, ENSMUSG00000059208, ENSMUSG00000045427, ENSMUSG00000044068, ENSMUSG00000059005, ENSMUSG00000032480, ENSMUSG00000002455, ENSMUSG00000028902, ENSMUSG00000033732, ENSMUSG00000045193, ENSMUSG00000038611, ENSMUSG00000042699, ENSMUSG00000020409,…	2.08073	7.19328e-05	6.14307
PANTHER_BP_ALL	BP00048:mRNA splicing	46	6.45148e-07	ENSMUSG00000029817, ENSMUSG00000052137, ENSMUSG00000031134, ENSMUSG00000028034, ENSMUSG00000060373, ENSMUSG00000078765, ENSMUSG00000046667, ENSMUSG00000028676, ENSMUSG00000038774, ENSMUSG00000032423, ENSMUSG00000039449, ENSMUSG00000037993, ENSMUSG00000031822, ENSMUSG00000020358, ENSMUSG00000042426, ENSMUSG00000028820, ENSMUSG00000045427, ENSMUSG00000034931, ENSMUSG00000044068, ENSMUSG00000004980,…	2.17749	0.000818805	5.08682
PANTHER_BP_ALL	BP00060:Protein metabolism and modification	383	8.56441e-07	ENSMUSG00000018199, ENSMUSG00000024360, ENSMUSG00000026254, ENSMUSG00000019774, ENSMUSG00000043572, ENSMUSG00000032501, ENSMUSG00000028703, ENSMUSG00000073563, ENSMUSG00000028708, ENSMUSG00000046378, ENSMUSG00000025613, ENSMUSG00000020124, ENSMUSG00000020905, ENSMUSG00000021116, ENSMUSG00000042719, ENSMUSG00000037805, ENSMUSG00000035299, ENSMUSG00000024359, ENSMUSG00000033364, ENSMUSG00000052833,…	1.23881	0.00108697	4.96378
PANTHER_BP_ALL	BP00273:Chromatin packaging and remodeling	41	9.3485e-07	ENSMUSG00000037935, ENSMUSG00000002028, ENSMUSG00000049516, ENSMUSG00000029920, ENSMUSG00000031161, ENSMUSG00000022141, ENSMUSG00000026918, ENSMUSG00000029279, ENSMUSG00000021488, ENSMUSG00000049327, ENSMUSG00000057406, ENSMUSG00000015697, ENSMUSG00000054021, ENSMUSG00000016559, ENSMUSG00000040481, ENSMUSG00000054766, ENSMUSG00000071054, ENSMUSG00000002052, ENSMUSG00000068855, ENSMUSG00000060032,…	2.26994	0.00118649	4.92574
PANTHER_BP_ALL	BP00063:Protein modification	165	1.32751e-05	ENSMUSG00000032307, ENSMUSG00000009828, ENSMUSG00000022453, ENSMUSG00000025060, ENSMUSG00000069631, ENSMUSG00000025823, ENSMUSG00000034761, ENSMUSG00000021457, ENSMUSG00000019254, ENSMUSG00000029513, ENSMUSG00000032501, ENSMUSG00000073563, ENSMUSG00000028708, ENSMUSG00000050796, ENSMUSG00000046378, ENSMUSG00000020571, ENSMUSG00000024777, ENSMUSG00000030062, ENSMUSG00000024789, ENSMUSG00000042719,…	1.37389	0.0168472	3.77347
PANTHER_BP_ALL	BP00064:Protein phosphorylation	101	9.58668e-05	ENSMUSG00000009828, ENSMUSG00000025060, ENSMUSG00000069631, ENSMUSG00000034761, ENSMUSG00000019254, ENSMUSG00000021457, ENSMUSG00000032501, ENSMUSG00000029513, ENSMUSG00000073563, ENSMUSG00000028708, ENSMUSG00000024777, ENSMUSG00000024789, ENSMUSG00000005469, ENSMUSG00000020601, ENSMUSG00000051590, ENSMUSG00000052783, ENSMUSG00000028771, ENSMUSG00000020580, ENSMUSG00000055254, ENSMUSG00000028630,…	1.4554	0.121604	2.91505
PANTHER_BP_ALL	BP00072:Protein complex assembly	18	0.000106155	ENSMUSG00000007739, ENSMUSG00000035505, ENSMUSG00000030007, ENSMUSG00000015656, ENSMUSG00000026696, ENSMUSG00000024359, ENSMUSG00000024911, ENSMUSG00000026864, ENSMUSG00000028703, ENSMUSG00000035759, ENSMUSG00000025613, ENSMUSG00000031578, ENSMUSG00000001416, ENSMUSG00000022437, ENSMUSG00000027274, ENSMUSG00000025980, ENSMUSG00000018160, ENSMUSG00000003848	2.8402	0.134646	2.87081
PANTHER_BP_ALL	BP00125:Intracellular protein traffic	127	0.000494448	ENSMUSG00000030738, ENSMUSG00000041670, ENSMUSG00000024261, ENSMUSG00000039367, ENSMUSG00000018707, ENSMUSG00000035954, ENSMUSG00000073563, ENSMUSG00000056429, ENSMUSG00000022957, ENSMUSG00000030082, ENSMUSG00000022789, ENSMUSG00000029712, ENSMUSG00000061455, ENSMUSG00000034243, ENSMUSG00000021124, ENSMUSG00000020483, ENSMUSG00000073643, ENSMUSG00000021062, ENSMUSG00000028975, ENSMUSG00000035770,…	1.33594	0.625733	2.20361
PANTHER_BP_ALL	BP00203:Cell cycle	124	0.000527423	ENSMUSG00000034575, ENSMUSG00000018707, ENSMUSG00000031583, ENSMUSG00000073563, ENSMUSG00000027455, ENSMUSG00000029712, ENSMUSG00000033970, ENSMUSG00000025209, ENSMUSG00000024789, ENSMUSG00000035770, ENSMUSG00000032264, ENSMUSG00000005469, ENSMUSG00000018965, ENSMUSG00000024811, ENSMUSG00000024780, ENSMUSG00000070544, ENSMUSG00000024817, ENSMUSG00000020580, ENSMUSG00000025218, ENSMUSG00000024952,…	1.3386	0.667335	2.17566
PANTHER_BP_ALL	BP00040:mRNA transcription	232	0.000925448	ENSMUSG00000063281, ENSMUSG00000063632, ENSMUSG00000018501, ENSMUSG00000050714, ENSMUSG00000038418, ENSMUSG00000070420, ENSMUSG00000021514, ENSMUSG00000061911, ENSMUSG00000035575, ENSMUSG00000021264, ENSMUSG00000025486, ENSMUSG00000041477, ENSMUSG00000022634, ENSMUSG00000072872, ENSMUSG00000044550, ENSMUSG00000013089, ENSMUSG00000020257, ENSMUSG00000033623, ENSMUSG00000051224, ENSMUSG00000027104,…	1.21148	1.16823	1.93247
PANTHER_BP_ALL	BP00034:DNA metabolism	48	0.00138921	ENSMUSG00000004099, ENSMUSG00000005370, ENSMUSG00000022141, ENSMUSG00000043962, ENSMUSG00000049717, ENSMUSG00000040463, ENSMUSG00000037214, ENSMUSG00000003812, ENSMUSG00000034575, ENSMUSG00000041133, ENSMUSG00000030528, ENSMUSG00000031583, ENSMUSG00000079109, ENSMUSG00000022248, ENSMUSG00000038845, ENSMUSG00000054766, ENSMUSG00000040681, ENSMUSG00000073563, ENSMUSG00000035575, ENSMUSG00000023104,…	1.58892	1.74891	1.75723
PANTHER_BP_ALL	BP00055:rRNA metabolism	16	0.00364402	ENSMUSG00000051169, ENSMUSG00000038279, ENSMUSG00000030521, ENSMUSG00000031403, ENSMUSG00000025047, ENSMUSG00000026127, ENSMUSG00000033294, ENSMUSG00000022247, ENSMUSG00000026234, ENSMUSG00000050312, ENSMUSG00000050244, ENSMUSG00000034259, ENSMUSG00000020706, ENSMUSG00000021595, ENSMUSG00000028010, ENSMUSG00000046865	2.26085	4.52767	1.34413
PANTHER_BP_ALL	BP00136:Other intracellular protein traffic	15	0.00385285	ENSMUSG00000029148, ENSMUSG00000001150, ENSMUSG00000022892, ENSMUSG00000027475, ENSMUSG00000037234, ENSMUSG00000022663, ENSMUSG00000025340, ENSMUSG00000040594, ENSMUSG00000004187, ENSMUSG00000001768, ENSMUSG00000027828, ENSMUSG00000032536, ENSMUSG00000026028, ENSMUSG00000030872, ENSMUSG00000023805	2.32803	4.78133	1.32045
PANTHER_BP_ALL	BP00178:Stress response	34	0.00495471	ENSMUSG00000009828, ENSMUSG00000021037, ENSMUSG00000024966, ENSMUSG00000015656, ENSMUSG00000028341, ENSMUSG00000031853, ENSMUSG00000029513, ENSMUSG00000026864, ENSMUSG00000028410, ENSMUSG00000020288, ENSMUSG00000023951, ENSMUSG00000031668, ENSMUSG00000036867, ENSMUSG00000038615, ENSMUSG00000031068, ENSMUSG00000056501, ENSMUSG00000028944, ENSMUSG00000021287, ENSMUSG00000032115, ENSMUSG00000025582,…	1.63395	6.10945	1.214
PANTHER_BP_ALL	BP00133:Nuclear transport	18	0.00540532	ENSMUSG00000057322, ENSMUSG00000042133, ENSMUSG00000015757, ENSMUSG00000030738, ENSMUSG00000016619, ENSMUSG00000021374, ENSMUSG00000009470, ENSMUSG00000080921, ENSMUSG00000001855, ENSMUSG00000059659, ENSMUSG00000052833, ENSMUSG00000002372, ENSMUSG00000063550, ENSMUSG00000006005, ENSMUSG00000062933, ENSMUSG00000038546, ENSMUSG00000066232, ENSMUSG00000027782, ENSMUSG00000027804	2.05316	6.64766	1.17733
PANTHER_BP_ALL	BP00108:Receptor protein tyrosine kinase signaling pathway	34	0.00625469	ENSMUSG00000023266, ENSMUSG00000037211, ENSMUSG00000048482, ENSMUSG00000032750, ENSMUSG00000001300, ENSMUSG00000031217, ENSMUSG00000000489, ENSMUSG00000005534, ENSMUSG00000024241, ENSMUSG00000034801, ENSMUSG00000005533, ENSMUSG00000023951, ENSMUSG00000028289, ENSMUSG00000032547, ENSMUSG00000031805, ENSMUSG00000020312, ENSMUSG00000029648, ENSMUSG00000027297, ENSMUSG00000024427, ENSMUSG00000027540,…	1.60945	7.65445	1.11609
PANTHER_BP_ALL	BP00289:Other metabolism	78	0.00980769	ENSMUSG00000051335, ENSMUSG00000021037, ENSMUSG00000079470, ENSMUSG00000061666, ENSMUSG00000025060, ENSMUSG00000058076, ENSMUSG00000040272, ENSMUSG00000018209, ENSMUSG00000037722, ENSMUSG00000069631, ENSMUSG00000040170, ENSMUSG00000069835, ENSMUSG00000031545, ENSMUSG00000022160, ENSMUSG00000000805, ENSMUSG00000034761, ENSMUSG00000028907, ENSMUSG00000009566, ENSMUSG00000031489, ENSMUSG00000069020,…	1.31397	11.7584
PANTHER_BP_ALL	BP00073:Translational regulation	17	0.0122771	ENSMUSG00000004996, ENSMUSG00000031490, ENSMUSG00000030738, ENSMUSG00000028034, ENSMUSG00000039536, ENSMUSG00000024991, ENSMUSG00000029145, ENSMUSG00000020741, ENSMUSG00000045983, ENSMUSG00000005610, ENSMUSG00000022323, ENSMUSG00000026740, ENSMUSG00000031668, ENSMUSG00000027613, ENSMUSG00000049658, ENSMUSG00000056076, ENSMUSG00000063888	1.93909	14.511
PANTHER_BP_ALL	BP00114:MAPKKK cascade	30	0.0146301	ENSMUSG00000009828, ENSMUSG00000052681, ENSMUSG00000037211, ENSMUSG00000032750, ENSMUSG00000050029, ENSMUSG00000030733, ENSMUSG00000026309, ENSMUSG00000031853, ENSMUSG00000023951, ENSMUSG00000024793, ENSMUSG00000033618, ENSMUSG00000020312, ENSMUSG00000024427, ENSMUSG00000024830, ENSMUSG00000021224, ENSMUSG00000030265, ENSMUSG00000036894, ENSMUSG00000022114, ENSMUSG00000018648, ENSMUSG00000062232,…	1.56917	17.0601
KEGG_PATHWAY	mmu03040:Spliceosome	44	8.20199e-13	ENSMUSG00000029817, ENSMUSG00000031134, ENSMUSG00000040383, ENSMUSG00000028609, ENSMUSG00000060373, ENSMUSG00000063800, ENSMUSG00000015656, ENSMUSG00000028676, ENSMUSG00000039449, ENSMUSG00000059659, ENSMUSG00000037993, ENSMUSG00000001383, ENSMUSG00000040824, ENSMUSG00000023932, ENSMUSG00000059208, ENSMUSG00000034931, ENSMUSG00000023007, ENSMUSG00000059005, ENSMUSG00000002455, ENSMUSG00000028902,…	3.2577	1.00938e-09	10.9959
KEGG_PATHWAY	mmu04722:Neurotrophin signaling pathway	30	0.000107409	ENSMUSG00000052684, ENSMUSG00000052681, ENSMUSG00000048482, ENSMUSG00000036333, ENSMUSG00000020849, ENSMUSG00000030733, ENSMUSG00000024241, ENSMUSG00000034801, ENSMUSG00000035109, ENSMUSG00000071369, ENSMUSG00000021514, ENSMUSG00000035027, ENSMUSG00000051391, ENSMUSG00000020312, ENSMUSG00000060477, ENSMUSG00000022285, ENSMUSG00000035529, ENSMUSG00000030265, ENSMUSG00000019699, ENSMUSG00000059923,…	2.11865	0.132097	2.87911
KEGG_PATHWAY	mmu04910:Insulin signaling pathway	31	0.000134909	ENSMUSG00000026254, ENSMUSG00000030815, ENSMUSG00000032601, ENSMUSG00000005534, ENSMUSG00000024241, ENSMUSG00000034801, ENSMUSG00000035109, ENSMUSG00000029513, ENSMUSG00000020538, ENSMUSG00000035027, ENSMUSG00000067279, ENSMUSG00000041798, ENSMUSG00000028708, ENSMUSG00000020612, ENSMUSG00000020312, ENSMUSG00000028944, ENSMUSG00000028945, ENSMUSG00000019487, ENSMUSG00000024830, ENSMUSG00000031490,…	2.06235	0.165893	2.78017
KEGG_PATHWAY	mmu03010:Ribosome	21	0.00111806	ENSMUSG00000067344, ENSMUSG00000061983, ENSMUSG00000060143, ENSMUSG00000071415, ENSMUSG00000058558, ENSMUSG00000062997, ENSMUSG00000070343, ENSMUSG00000059291, ENSMUSG00000019505, ENSMUSG00000066809, ENSMUSG00000022601, ENSMUSG00000069117, ENSMUSG00000025290, ENSMUSG00000057322, ENSMUSG00000062456, ENSMUSG00000037805, ENSMUSG00000080921, ENSMUSG00000028234, ENSMUSG00000039221, ENSMUSG00000008682,…	2.16626	1.36722	1.86416
KEGG_PATHWAY	mmu05200:Pathways in cancer	54	0.00120285	ENSMUSG00000005370, ENSMUSG00000029071, ENSMUSG00000018209, ENSMUSG00000020888, ENSMUSG00000000489, ENSMUSG00000037992, ENSMUSG00000032402, ENSMUSG00000026430, ENSMUSG00000023067, ENSMUSG00000017386, ENSMUSG00000022061, ENSMUSG00000048701, ENSMUSG00000026478, ENSMUSG00000032487, ENSMUSG00000022297, ENSMUSG00000028681, ENSMUSG00000030265, ENSMUSG00000001507, ENSMUSG00000015647, ENSMUSG00000002900,…	1.53487	1.47021	1.83262
KEGG_PATHWAY	mmu05215:Prostate cancer	21	0.00129496	ENSMUSG00000028212, ENSMUSG00000025958, ENSMUSG00000030265, ENSMUSG00000020053, ENSMUSG00000019699, ENSMUSG00000059923, ENSMUSG00000023944, ENSMUSG00000000489, ENSMUSG00000024241, ENSMUSG00000020184, ENSMUSG00000034801, ENSMUSG00000005533, ENSMUSG00000035027, ENSMUSG00000024620, ENSMUSG00000057329, ENSMUSG00000021270, ENSMUSG00000025499, ENSMUSG00000020048, ENSMUSG00000023067, ENSMUSG00000022061,…	2.14219	1.58197	1.8008
KEGG_PATHWAY	mmu04710:Circadian rhythm	7	0.00141526	ENSMUSG00000020893, ENSMUSG00000055866, ENSMUSG00000029238, ENSMUSG00000020038, ENSMUSG00000055116, ENSMUSG00000030103, ENSMUSG00000020889	4.94351	1.72776	1.76252
KEGG_PATHWAY	mmu04510:Focal adhesion	35	0.00428639	ENSMUSG00000052684, ENSMUSG00000052681, ENSMUSG00000025809, ENSMUSG00000020053, ENSMUSG00000000489, ENSMUSG00000024241, ENSMUSG00000035109, ENSMUSG00000034801, ENSMUSG00000005533, ENSMUSG00000023951, ENSMUSG00000019907, ENSMUSG00000020312, ENSMUSG00000029648, ENSMUSG00000034165, ENSMUSG00000026478, ENSMUSG00000018012, ENSMUSG00000026725, ENSMUSG00000029306, ENSMUSG00000024290, ENSMUSG00000001507,…	1.62287	5.14889	1.28829
KEGG_PATHWAY	mmu05221:Acute myeloid leukemia	14	0.00697061	ENSMUSG00000024830, ENSMUSG00000031490, ENSMUSG00000030265, ENSMUSG00000019699, ENSMUSG00000059923, ENSMUSG00000024241, ENSMUSG00000034801, ENSMUSG00000066687, ENSMUSG00000037992, ENSMUSG00000035027, ENSMUSG00000024014, ENSMUSG00000004040, ENSMUSG00000002250, ENSMUSG00000025499	2.25493	8.24799	1.08365
KEGG_PATHWAY	mmu04010:MAPK signaling pathway	43	0.00710991	ENSMUSG00000052684, ENSMUSG00000024242, ENSMUSG00000052681, ENSMUSG00000048482, ENSMUSG00000018209, ENSMUSG00000015656, ENSMUSG00000000489, ENSMUSG00000024241, ENSMUSG00000034801, ENSMUSG00000024948, ENSMUSG00000071369, ENSMUSG00000033953, ENSMUSG00000026436, ENSMUSG00000028708, ENSMUSG00000035027, ENSMUSG00000025408, ENSMUSG00000033618, ENSMUSG00000017291, ENSMUSG00000026074, ENSMUSG00000022414,…	1.48971	8.40626	1.0754
KEGG_PATHWAY	mmu05211:Renal cell carcinoma	16	0.00718229	ENSMUSG00000052684, ENSMUSG00000032633, ENSMUSG00000052681, ENSMUSG00000030265, ENSMUSG00000019699, ENSMUSG00000059923, ENSMUSG00000000489, ENSMUSG00000024241, ENSMUSG00000034801, ENSMUSG00000021253, ENSMUSG00000058709, ENSMUSG00000023951, ENSMUSG00000035027, ENSMUSG00000025499, ENSMUSG00000017776, ENSMUSG00000031380	2.09847	8.48839	1.07117
KEGG_PATHWAY	mmu05214:Glioma	15	0.00766799	ENSMUSG00000030265, ENSMUSG00000020053, ENSMUSG00000019699, ENSMUSG00000059923, ENSMUSG00000000489, ENSMUSG00000024241, ENSMUSG00000020184, ENSMUSG00000035109, ENSMUSG00000034801, ENSMUSG00000005533, ENSMUSG00000035027, ENSMUSG00000024620, ENSMUSG00000020312, ENSMUSG00000025499, ENSMUSG00000023067	2.15175	9.0378	1.04394
KEGG_PATHWAY	mmu04114:Oocyte meiosis	22	0.0113891	ENSMUSG00000028212, ENSMUSG00000025135, ENSMUSG00000021051, ENSMUSG00000025060, ENSMUSG00000020053, ENSMUSG00000020849, ENSMUSG00000041133, ENSMUSG00000005469, ENSMUSG00000018965, ENSMUSG00000033953, ENSMUSG00000005533, ENSMUSG00000032058, ENSMUSG00000009630, ENSMUSG00000014956, ENSMUSG00000029003, ENSMUSG00000022994, ENSMUSG00000051391, ENSMUSG00000024777, ENSMUSG00000023908, ENSMUSG00000024974,…	1.75633	13.1474
KEGG_PATHWAY	mmu04310:Wnt signaling pathway	26	0.017468	ENSMUSG00000052684, ENSMUSG00000018012, ENSMUSG00000022297, ENSMUSG00000021051, ENSMUSG00000029071, ENSMUSG00000030201, ENSMUSG00000024290, ENSMUSG00000005469, ENSMUSG00000034574, ENSMUSG00000020888, ENSMUSG00000033953, ENSMUSG00000032058, ENSMUSG00000009630, ENSMUSG00000030020, ENSMUSG00000000184, ENSMUSG00000032402, ENSMUSG00000019969, ENSMUSG00000020580, ENSMUSG00000081683, ENSMUSG00000031169,…	1.60202	19.4959
KEGG_PATHWAY	mmu04144:Endocytosis	33	0.0176222	ENSMUSG00000023353, ENSMUSG00000052632, ENSMUSG00000015656, ENSMUSG00000032504, ENSMUSG00000026860, ENSMUSG00000027363, ENSMUSG00000027575, ENSMUSG00000027695, ENSMUSG00000025422, ENSMUSG00000005533, ENSMUSG00000060279, ENSMUSG00000020817, ENSMUSG00000022789, ENSMUSG00000031489, ENSMUSG00000028419, ENSMUSG00000036499, ENSMUSG00000029648, ENSMUSG00000018363, ENSMUSG00000001036, ENSMUSG00000051343,…	1.49983	19.6511
KEGG_PATHWAY	mmu05210:Colorectal cancer	17	0.0214423	ENSMUSG00000018012, ENSMUSG00000052684, ENSMUSG00000022297, ENSMUSG00000005370, ENSMUSG00000029071, ENSMUSG00000030265, ENSMUSG00000019699, ENSMUSG00000059923, ENSMUSG00000020888, ENSMUSG00000024241, ENSMUSG00000034801, ENSMUSG00000005533, ENSMUSG00000021253, ENSMUSG00000032402, ENSMUSG00000024620, ENSMUSG00000081683, ENSMUSG00000057329	1.81481	23.4128
KEGG_PATHWAY	mmu00270:Cysteine and methionine metabolism	9	0.0221145	ENSMUSG00000004099, ENSMUSG00000020661, ENSMUSG00000071711, ENSMUSG00000021311, ENSMUSG00000042032, ENSMUSG00000053907, ENSMUSG00000027893, ENSMUSG00000029772, ENSMUSG00000063953, ENSMUSG00000075232	2.50385	24.0577
KEGG_PATHWAY	mmu05016:Huntington's disease	30	0.0230279	ENSMUSG00000005510, ENSMUSG00000048482, ENSMUSG00000021577, ENSMUSG00000058076, ENSMUSG00000030647, ENSMUSG00000045996, ENSMUSG00000021606, ENSMUSG00000062683, ENSMUSG00000002416, ENSMUSG00000060279, ENSMUSG00000039117, ENSMUSG00000027804, ENSMUSG00000023089, ENSMUSG00000059734, ENSMUSG00000032965, ENSMUSG00000042523, ENSMUSG00000016427, ENSMUSG00000025958, ENSMUSG00000054321, ENSMUSG00000020163,…	1.50505	24.9259

## Sheet: GF SI (GSEA)
UP
Function	Normalized enrichment score (NES)	FDR q-value
GO_bp
RNA_SPLICING	2.28	<0,001
PROTEIN_FOLDING	2.07	0.009
RESPONSE_TO_BIOTIC_STIMULUS	2.07	0.007
MRNA_METABOLIC_PROCESS	2.06	0.006
RNA_PROCESSING	2.03	0.006
MRNA_PROCESSING_GO_0006397	1.99	0.008
RHYTHMIC_PROCESS	1.99	0.008
NEGATIVE_REGULATION_OF_RNA_METABOLIC_PROCESS	1.96	0.01
NEGATIVE_REGULATION_OF_TRANSCRIPTION_DNA_DEPENDENT	1.94	0.011
NEGATIVE_REGULATION_OF_CELLULAR_METABOLIC_PROCESS	1.92	0.013
NEGATIVE_REGULATION_OF_METABOLIC_PROCESS	1.91	0.014
NEGATIVE_REGULATION_OF_TRANSCRIPTION	1.91	0.013
NEGATIVE_REGULATION_OF_NUCLEOBASENUCLEOSIDENUCLEOTIDE_AND_NUCLEIC_ACID_METABOLIC_PROCESS	1.91	0.012
PROTEIN_RNA_COMPLEX_ASSEMBLY	1.78	0.05
NEGATIVE_REGULATION_OF_TRANSCRIPTION_FROM_RNA_POLYMERASE_II_PROMOTER	1.77	0.051
REGULATION_OF_PROTEIN_KINASE_ACTIVITY	1.75	0.061
REGULATION_OF_KINASE_ACTIVITY	1.73	0.068
REGULATION_OF_GROWTH	1.73	0.068
RIBONUCLEOPROTEIN_COMPLEX_BIOGENESIS_AND_ASSEMBLY	1.72	0.067
REGULATION_OF_CELL_GROWTH	1.7	0.078
NEGATIVE_REGULATION_OF_MAP_KINASE_ACTIVITY	1.68	0.091
RNA_SPLICINGVIA_TRANSESTERIFICATION_REACTIONS	1.68	0.087
GO_cc
SPLICEOSOME	2.03	0.008
CELL_CORTEX	1.9	0.023
NUCLEAR_PART	1.82	0.043
SPINDLE	1.79	0.046
NUCLEOLUS	1.78	0.042
RUFFLE	1.72	0.067
NUCLEAR_LUMEN	1.71	0.06
CONDENSED_CHROMOSOME	1.69	0.063
CELL_CORTEX_PART	1.68	0.063
PERINUCLEAR_REGION_OF_CYTOPLASM	1.66	0.068
CELL_PROJECTION	1.65	0.067
RIBONUCLEOPROTEIN_COMPLEX	1.64	0.069
MEMBRANE_ENCLOSED_LUMEN	1.61	0.085
ORGANELLE_LUMEN	1.6	0.084
CELL_SURFACE	1.59	0.082
PROTEASOME_COMPLEX	1.58	0.087
GO_mf
GUANYL_NUCLEOTIDE_EXCHANGE_FACTOR_ACTIVITY	1.91	0.084
UNFOLDED_PROTEIN_BINDING	1.84	0.094
ATPASE_ACTIVITY	1.81	0.088
ATP_DEPENDENT_HELICASE_ACTIVITY	1.79	0.076
TRANSLATION_FACTOR_ACTIVITY_NUCLEIC_ACID_BINDING	1.78	0.068
ATPASE_ACTIVITY_COUPLED	1.75	0.082
RNA_HELICASE_ACTIVITY	1.74	0.078
TRANSLATION_REGULATOR_ACTIVITY	1.73	0.075
TRANSCRIPTION_REPRESSOR_ACTIVITY	1.71	0.083
TRANSCRIPTION_FACTOR_BINDING	1.69	0.089
TRANSCRIPTION_COREPRESSOR_ACTIVITY	1.68	0.088
TRANSCRIPTION_COFACTOR_ACTIVITY	1.67	0.088
HELICASE_ACTIVITY	1.66	0.09
MAGNESIUM_ION_BINDING	1.64	0.099
KEGG
KEGG_SPLICEOSOME	2.33	<0,001
KEGG_ANTIGEN_PROCESSING_AND_PRESENTATION	2.1	0.001
KEGG_PRION_DISEASES	1.9	0.012
DOWN
Function	Normalized enrichment score (NES)	FDR q-value
KEGG
KEGG_HOMOLOGOUS_RECOMBINATION	-1.83	0.092
KEGG_GLYCOSYLPHOSPHATIDYLINOSITOL_GPI_ANCHOR_BIOSYNTHESIS	-1.82	0.048
KEGG_GLYCOSAMINOGLYCAN_DEGRADATION	-1.74	0.069

## Sheet: GFsiHigh-GFsiLow (GSEA)
UP (higher in GF-SIlow)
Function	Normalized enrichment score (NES)	FDR q-value
GO_bp
GO_REGULATION_OF_MAST_CELL_ACTIVATION_INVOLVED_IN_IMMUNE_RESPONSE	2.32	0.001
GO_REGULATION_OF_LEUKOCYTE_DEGRANULATION	2.31	0.001
GO_REGULATION_OF_MAST_CELL_ACTIVATION	2.16	0.01
GO_CELLULAR_DEFENSE_RESPONSE	2.02	0.062
GO_MYELOID_CELL_ACTIVATION_INVOLVED_IN_IMMUNE_RESPONSE	2	0.063
GO_IONOTROPIC_GLUTAMATE_RECEPTOR_SIGNALING_PATHWAY	1.97	0.073
KEGG
KEGG_COMPLEMENT_AND_COAGULATION_CASCADES	1.88	0.076
DOWN (higher in GF-SIhigh)
Function	Normalized enrichment score (NES)	FDR q-value		Function	Normalized enrichment score (NES)	FDR q-value
GO_bp				KEGG
GO_RIBONUCLEOPROTEIN_COMPLEX_BIOGENESIS	-2.52			KEGG_SPLICEOSOME	-2.65	<0,001
GO_TRANSLATIONAL_INITIATION	-2.5	<0,001		KEGG_PROTEASOME	-2.47	<0,001
GO_ESTABLISHMENT_OF_PROTEIN_LOCALIZATION_TO_ENDOPLASMIC_RETICULUM	-2.49	<0,001		KEGG_RIBOSOME	-2.46	<0,001
GO_NUCLEAR_TRANSCRIBED_MRNA_CATABOLIC_PROCESS_NONSENSE_MEDIATED_DECAY	-2.47	<0,001		KEGG_OXIDATIVE_PHOSPHORYLATION	-2.07	0.002
GO_REGULATION_OF_CELLULAR_AMINO_ACID_METABOLIC_PROCESS	-2.38	<0,001		KEGG_PARKINSONS_DISEASE	-1.95	0.005
GO_RRNA_METABOLIC_PROCESS	-2.38	<0,001		KEGG_HUNTINGTONS_DISEASE	-1.75	0.037
GO_RIBOSOME_BIOGENESIS	-2.35	<0,001		KEGG_P53_SIGNALING_PATHWAY	-1.67	0.064
GO_RNA_SPLICING_VIA_TRANSESTERIFICATION_REACTIONS	-2.34	<0,001		KEGG_AMINOACYL_TRNA_BIOSYNTHESIS	-1.65	0.074
GO_PROTEIN_LOCALIZATION_TO_ENDOPLASMIC_RETICULUM	-2.34	<0,001		KEGG_MISMATCH_REPAIR	-1.64	0.067
GO_SPLICEOSOMAL_COMPLEX_ASSEMBLY	-2.33	<0,001		KEGG_HOMOLOGOUS_RECOMBINATION	-1.63	0.072
GO_PROTEIN_FOLDING	-2.31	<0,001		KEGG_NUCLEOTIDE_EXCISION_REPAIR	-1.62	0.068
GO_MRNA_METABOLIC_PROCESS	-2.27	<0,001
GO_RIBONUCLEOPROTEIN_COMPLEX_SUBUNIT_ORGANIZATION	-2.26	<0,001
GO_RNA_SPLICING	-2.22	0.001
GO_ANAPHASE_PROMOTING_COMPLEX_DEPENDENT_CATABOLIC_PROCESS	-2.22	0.001
GO_REGULATION_OF_CELLULAR_AMINE_METABOLIC_PROCESS	-2.2	0.001
GO_RNA_CATABOLIC_PROCESS	-2.19	0.001
GO_SPLICEOSOMAL_SNRNP_ASSEMBLY	-2.19	0.001
GO_MRNA_PROCESSING	-2.19	0.001
GO_REGULATION_OF_LIGASE_ACTIVITY	-2.16	0.001
GO_NCRNA_PROCESSING	-2.15	0.001
GO_NEGATIVE_REGULATION_OF_PROTEIN_MODIFICATION_BY_SMALL_PROTEIN_CONJUGATION_OR_REMOVAL	-2.15	0.001
GO_NCRNA_METABOLIC_PROCESS	-2.15	0.001
GO_POSITIVE_REGULATION_OF_LIGASE_ACTIVITY	-2.12	0.002
GO_RNA_SECONDARY_STRUCTURE_UNWINDING	-2.11	0.002
GO_REGULATION_OF_PROTEIN_UBIQUITINATION_INVOLVED_IN_UBIQUITIN_DEPENDENT_PROTEIN_CATABOLIC_PROCESS	-2.1	0.002
GO_TUMOR_NECROSIS_FACTOR_MEDIATED_SIGNALING_PATHWAY	-2.09	0.002
GO_REGULATION_OF_MEGAKARYOCYTE_DIFFERENTIATION	-2.08	0.003
GO_REGULATION_OF_RNA_STABILITY	-2.07	0.003
GO_NIK_NF_KAPPAB_SIGNALING	-2.04	0.005
GO_POSITIVE_REGULATION_OF_GENE_EXPRESSION_EPIGENETIC	-2.04	0.005
GO_PROTEIN_COMPLEX_LOCALIZATION	-2.03	0.005
GO_CHROMATIN_SILENCING_AT_RDNA	-2	0.008
GO_MULTI_ORGANISM_METABOLIC_PROCESS	-1.99	0.008
GO_ANTIGEN_PROCESSING_AND_PRESENTATION_OF_EXOGENOUS_PEPTIDE_ANTIGEN_VIA_MHC_CLASS_I	-1.99	0.008
GO_PROTEIN_HETEROTETRAMERIZATION	-1.98	0.008
GO_REGULATION_OF_INCLUSION_BODY_ASSEMBLY	-1.98	0.008
GO_MRNA_3_END_PROCESSING	-1.98	0.008
GO_GENE_SILENCING_BY_RNA	-1.98	0.008
GO_TRANSLESION_SYNTHESIS	-1.96	0.01
GO_PROTEIN_REFOLDING	-1.96	0.011
GO_REGULATION_OF_TRANSCRIPTION_INITIATION_FROM_RNA_POLYMERASE_II_PROMOTER	-1.95	0.011
GO_CELLULAR_MACROMOLECULAR_COMPLEX_ASSEMBLY	-1.94	0.012
GO_POSTTRANSCRIPTIONAL_REGULATION_OF_GENE_EXPRESSION	-1.93	0.014
GO_NEGATIVE_REGULATION_OF_RESPONSE_TO_ENDOPLASMIC_RETICULUM_STRESS	-1.92	0.016
GO_REGULATION_OF_TRANSLATIONAL_INITIATION	-1.91	0.017
GO_TRANSCRIPTION_COUPLED_NUCLEOTIDE_EXCISION_REPAIR	-1.91	0.017
GO_REGULATION_OF_PROTEIN_MODIFICATION_BY_SMALL_PROTEIN_CONJUGATION_OR_REMOVAL	-1.9	0.018
GO_REGULATION_OF_GENE_EXPRESSION_EPIGENETIC	-1.9	0.018
GO_REGULATION_OF_DNA_TEMPLATED_TRANSCRIPTION_INITIATION	-1.9	0.018
GO_DNA_DAMAGE_RESPONSE_DETECTION_OF_DNA_DAMAGE	-1.9	0.018
GO_RNA_3_END_PROCESSING	-1.9	0.018
GO_ANTIGEN_PROCESSING_AND_PRESENTATION_OF_PEPTIDE_ANTIGEN_VIA_MHC_CLASS_I	-1.89	0.018
GO_HISTONE_EXCHANGE	-1.89	0.017
GO_REGULATION_OF_HEMATOPOIETIC_PROGENITOR_CELL_DIFFERENTIATION	-1.88	0.021
GO_NUCLEOTIDE_EXCISION_REPAIR	-1.88	0.021
GO_RESPONSE_TO_TEMPERATURE_STIMULUS	-1.87	0.021
GO_REGULATION_OF_ESTABLISHMENT_OF_PLANAR_POLARITY	-1.87	0.021
GO_ANTERIOR_POSTERIOR_AXIS_SPECIFICATION	-1.86	0.023
GO_NUCLEOTIDE_EXCISION_REPAIR_DNA_DAMAGE_RECOGNITION	-1.85	0.026
GO_REGULATION_OF_MRNA_METABOLIC_PROCESS	-1.84	0.027
GO_PROTEIN_TARGETING_TO_MEMBRANE	-1.84	0.028
GO_MATURATION_OF_SSU_RRNA	-1.84	0.028
GO_PEPTIDE_METABOLIC_PROCESS	-1.83	0.03
GO_ORGANIC_CYCLIC_COMPOUND_CATABOLIC_PROCESS	-1.83	0.031
GO_POSITIVE_REGULATION_OF_PROTEOLYSIS	-1.83	0.031
GO_REGULATION_OF_MRNA_SPLICING_VIA_SPLICEOSOME	-1.83	0.03
GO_DNA_REPLICATION_INDEPENDENT_NUCLEOSOME_ORGANIZATION	-1.82	0.033
GO_NUCLEOTIDE_EXCISION_REPAIR_DNA_GAP_FILLING	-1.82	0.033
GO_POSITIVE_REGULATION_OF_PROTEIN_MODIFICATION_BY_SMALL_PROTEIN_CONJUGATION_OR_REMOVAL	-1.81	0.034
GO_POSTREPLICATION_REPAIR	-1.81	0.034
GO_NON_CANONICAL_WNT_SIGNALING_PATHWAY	-1.81	0.035
GO_ENDOCRINE_PROCESS	-1.81	0.034
GO_REGULATION_OF_DNA_TEMPLATED_TRANSCRIPTION_ELONGATION	-1.8	0.039
GO_NEGATIVE_REGULATION_OF_HEMATOPOIETIC_PROGENITOR_CELL_DIFFERENTIATION	-1.8	0.038
GO_POSITIVE_REGULATION_OF_CANONICAL_WNT_SIGNALING_PATHWAY	-1.79	0.039
GO_CENTROMERE_COMPLEX_ASSEMBLY	-1.79	0.04
GO_POSITIVE_REGULATION_OF_WNT_SIGNALING_PATHWAY	-1.79	0.04
GO_NEGATIVE_REGULATION_OF_GENE_EXPRESSION_EPIGENETIC	-1.79	0.041
GO_ERROR_FREE_TRANSLESION_SYNTHESIS	-1.78	0.041
GO_RIBOSOMAL_SMALL_SUBUNIT_BIOGENESIS	-1.78	0.042
GO_RIBOSOMAL_LARGE_SUBUNIT_BIOGENESIS	-1.78	0.041
GO_RNA_CAPPING	-1.78	0.042
GO_RIBONUCLEOPROTEIN_COMPLEX_LOCALIZATION	-1.78	0.042
GO_DNA_CONFORMATION_CHANGE	-1.77	0.043
GO_MATURATION_OF_5_8S_RRNA	-1.77	0.042
GO_FC_EPSILON_RECEPTOR_SIGNALING_PATHWAY	-1.77	0.043
GO_PROTEIN_MONOUBIQUITINATION	-1.77	0.043
GO_PROTEIN_DNA_COMPLEX_SUBUNIT_ORGANIZATION	-1.77	0.043
GO_ATP_DEPENDENT_CHROMATIN_REMODELING	-1.77	0.044
GO_REGULATION_OF_ENDOPLASMIC_RETICULUM_STRESS_INDUCED_INTRINSIC_APOPTOTIC_SIGNALING_PATHWAY	-1.76	0.044
GO_OXIDATIVE_PHOSPHORYLATION	-1.76	0.044
GO_POSITIVE_REGULATION_OF_DNA_TEMPLATED_TRANSCRIPTION_INITIATION	-1.76	0.044
GO_DNA_TEMPLATED_TRANSCRIPTION_TERMINATION	-1.76	0.044
GO_PROTEIN_TRANSPORT_ALONG_MICROTUBULE	-1.76	0.044
GO_NUCLEOSIDE_MONOPHOSPHATE_METABOLIC_PROCESS	-1.76	0.043
GO_DNA_REPLICATION_DEPENDENT_NUCLEOSOME_ORGANIZATION	-1.76	0.043
GO_POSITIVE_REGULATION_OF_TRANSLATIONAL_INITIATION	-1.76	0.044
GO_PEPTIDE_HORMONE_PROCESSING	-1.75	0.045
GO_GENE_SILENCING	-1.75	0.045
GO_VIRAL_LIFE_CYCLE	-1.75	0.045
GO_SNRNA_METABOLIC_PROCESS	-1.75	0.045
GO_GLYCOSYL_COMPOUND_METABOLIC_PROCESS	-1.75	0.045
GO_POSITIVE_REGULATION_OF_CELLULAR_PROTEIN_CATABOLIC_PROCESS	-1.75	0.045
GO_REGULATION_OF_RNA_SPLICING	-1.75	0.045
GO_POSITIVE_REGULATION_OF_MRNA_PROCESSING	-1.75	0.046
GO_INNATE_IMMUNE_RESPONSE_ACTIVATING_CELL_SURFACE_RECEPTOR_SIGNALING_PATHWAY	-1.74	0.047
GO_POSITIVE_REGULATION_OF_DNA_TEMPLATED_TRANSCRIPTION_ELONGATION	-1.74	0.046
GO_REGULATION_OF_SYSTEMIC_ARTERIAL_BLOOD_PRESSURE_BY_HORMONE	-1.74	0.047
GO_REGULATION_OF_DNA_BINDING	-1.74	0.048
GO_REGULATION_OF_CELLULAR_PROTEIN_CATABOLIC_PROCESS	-1.73	0.049
GO_TERMINATION_OF_RNA_POLYMERASE_II_TRANSCRIPTION	-1.73	0.049
GO_ERAD_PATHWAY	-1.72	0.052
GO_DNA_PACKAGING	-1.72	0.052
GO_DNA_SYNTHESIS_INVOLVED_IN_DNA_REPAIR	-1.72	0.055
GO_RESPONSE_TO_HEAT	-1.72	0.055
GO_REGULATION_OF_CELL_CYCLE_PHASE_TRANSITION	-1.71	0.056
GO_EMBRYONIC_PLACENTA_MORPHOGENESIS	-1.71	0.056
GO_T_CELL_RECEPTOR_SIGNALING_PATHWAY	-1.71	0.056
GO_REGULATION_OF_CELLULAR_RESPONSE_TO_HEAT	-1.71	0.056
GO_CILIUM_ORGANIZATION	-1.7	0.061
GO_POSITIVE_REGULATION_OF_HEART_CONTRACTION	-1.7	0.061
GO_ELECTRON_TRANSPORT_CHAIN	-1.69	0.064
GO_CYTOPLASMIC_TRANSLATION	-1.69	0.068
GO_POSITIVE_REGULATION_OF_ALCOHOL_BIOSYNTHETIC_PROCESS	-1.69	0.068
GO_PROTEASOMAL_PROTEIN_CATABOLIC_PROCESS	-1.68	0.069
GO_NEGATIVE_REGULATION_OF_INTRINSIC_APOPTOTIC_SIGNALING_PATHWAY	-1.68	0.07
GO_NEGATIVE_REGULATION_OF_MYELOID_CELL_DIFFERENTIATION	-1.68	0.07
GO_POSITIVE_REGULATION_OF_ATPASE_ACTIVITY	-1.68	0.07
GO_NUCLEOSIDE_TRIPHOSPHATE_METABOLIC_PROCESS	-1.68	0.071
GO_CELL_CYCLE_G2_M_PHASE_TRANSITION	-1.68	0.071
GO_MATURATION_OF_SSU_RRNA_FROM_TRICISTRONIC_RRNA_TRANSCRIPT_SSU_RRNA_5_8S_RRNA_LSU_RRNA_	-1.67	0.076
GO_NEGATIVE_REGULATION_OF_DNA_BINDING	-1.66	0.077
GO_TELOMERE_CAPPING	-1.66	0.078
GO_AMIDE_BIOSYNTHETIC_PROCESS	-1.66	0.078
GO_PROTEIN_EXIT_FROM_ENDOPLASMIC_RETICULUM	-1.66	0.079
GO_REGULATION_OF_PROTEOLYSIS	-1.66	0.079
GO_REGULATION_OF_TRANSCRIPTION_REGULATORY_REGION_DNA_BINDING	-1.66	0.078
GO_REGULATION_OF_MITOCHONDRIAL_MEMBRANE_POTENTIAL	-1.66	0.078
GO_REGULATION_OF_INTRINSIC_APOPTOTIC_SIGNALING_PATHWAY	-1.66	0.078
GO_POSITIVE_REGULATION_OF_PROTEIN_CATABOLIC_PROCESS	-1.65	0.079
GO_NEGATIVE_REGULATION_OF_CALCIUM_ION_TRANSPORT	-1.65	0.08
GO_CHROMATIN_ASSEMBLY_OR_DISASSEMBLY	-1.65	0.08
GO_CHROMATIN_SILENCING	-1.65	0.082
GO_ER_NUCLEUS_SIGNALING_PATHWAY	-1.65	0.083
GO_HISTONE_MRNA_METABOLIC_PROCESS	-1.64	0.085
GO_DNA_BIOSYNTHETIC_PROCESS	-1.64	0.086
GO_POSITIVE_REGULATION_OF_MRNA_3_END_PROCESSING	-1.64	0.087
GO_ER_ASSOCIATED_UBIQUITIN_DEPENDENT_PROTEIN_CATABOLIC_PROCESS	-1.64	0.088
GO_PROTEIN_LOCALIZATION_TO_ORGANELLE	-1.64	0.088
GO_PURINE_CONTAINING_COMPOUND_METABOLIC_PROCESS	-1.64	0.087
GO_NUCLEOTIDE_EXCISION_REPAIR_PREINCISION_COMPLEX_ASSEMBLY	-1.63	0.09
GO_NEGATIVE_REGULATION_OF_TRANSFERASE_ACTIVITY	-1.63	0.09
GO_TRANSCRIPTION_ELONGATION_FROM_RNA_POLYMERASE_II_PROMOTER	-1.63	0.09
GO_MATURATION_OF_5_8S_RRNA_FROM_TRICISTRONIC_RRNA_TRANSCRIPT_SSU_RRNA_5_8S_RRNA_LSU_RRNA_	-1.63	0.09
GO_NEGATIVE_REGULATION_OF_CELLULAR_AMIDE_METABOLIC_PROCESS	-1.63	0.09
GO_POSITIVE_REGULATION_OF_SMOOTHENED_SIGNALING_PATHWAY	-1.63	0.091
GO_NUCLEOTIDE_EXCISION_REPAIR_DNA_INCISION	-1.62	0.093
GO_REGULATION_OF_ALCOHOL_BIOSYNTHETIC_PROCESS	-1.62	0.094
GO_RESPONSE_TO_COLD	-1.62	0.094
GO_NEGATIVE_REGULATION_OF_CANONICAL_WNT_SIGNALING_PATHWAY	-1.62	0.094
GO_POSTTRANSCRIPTIONAL_GENE_SILENCING	-1.62	0.095
GO_POSITIVE_REGULATION_OF_PEPTIDYL_THREONINE_PHOSPHORYLATION	-1.62	0.095

## Sheet: exGF SI
Functional annotation and enrichment analysis using DAVID v6.7 (http://david.abcc.ncifcrf.gov/)
shown are only results with a false discovery rate (FDR) <25%; values with FDR<10% were considered significant; enriched terms with 10%>FDR<25% are shown in grey
FDR/100 is called p-adjusted (padj) in manuscript and figures
For the combined lists, only biological processes and pathways are reported
UP
Category	Term	Count	un-adjusted p-value	Genes	Fold Enrichment	FDR [%]	-log10 (FDR/100)
GOTERM_BP_5	GO:0010468~regulation of gene expression	199	3.99064e-14	ENSMUSG00000025616, ENSMUSG00000050855, ENSMUSG00000026739, ENSMUSG00000018501, ENSMUSG00000026058, ENSMUSG00000016481, ENSMUSG00000042197, ENSMUSG00000029684, ENSMUSG00000072258, ENSMUSG00000059475, ENSMUSG00000013089, ENSMUSG00000033623, ENSMUSG00000026740, ENSMUSG00000057093, ENSMUSG00000051451, ENSMUSG00000022255, ENSMUSG00000006599, ENSMUSG00000019897, ENSMUSG00000021149, ENSMUSG00000051469,…	1.63747	6.4404e-11	12.1911
GOTERM_BP_5	GO:0019219~regulation of nucleobase, nucleoside, nucleotide and nucleic acid metabolic process	193	1.09286e-13	ENSMUSG00000025616, ENSMUSG00000050855, ENSMUSG00000026739, ENSMUSG00000018501, ENSMUSG00000024639, ENSMUSG00000026058, ENSMUSG00000042197, ENSMUSG00000029684, ENSMUSG00000072258, ENSMUSG00000059475, ENSMUSG00000013089, ENSMUSG00000033623, ENSMUSG00000031659, ENSMUSG00000057093, ENSMUSG00000051451, ENSMUSG00000022255, ENSMUSG00000006599, ENSMUSG00000019897, ENSMUSG00000021149, ENSMUSG00000051469,…	1.63939	1.76525e-10	11.7532
GOTERM_BP_5	GO:0010556~regulation of macromolecule biosynthetic process	194	1.74859e-13	ENSMUSG00000025616, ENSMUSG00000050855, ENSMUSG00000026739, ENSMUSG00000018501, ENSMUSG00000026058, ENSMUSG00000042197, ENSMUSG00000029684, ENSMUSG00000072258, ENSMUSG00000059475, ENSMUSG00000013089, ENSMUSG00000033623, ENSMUSG00000026740, ENSMUSG00000057093, ENSMUSG00000051451, ENSMUSG00000022255, ENSMUSG00000006599, ENSMUSG00000019897, ENSMUSG00000021149, ENSMUSG00000051469, ENSMUSG00000055116,…	1.62851	2.82541e-10	11.5489
GOTERM_BP_5	GO:0031326~regulation of cellular biosynthetic process	199	1.90916e-13	ENSMUSG00000025616, ENSMUSG00000050855, ENSMUSG00000026739, ENSMUSG00000018501, ENSMUSG00000024639, ENSMUSG00000026058, ENSMUSG00000042197, ENSMUSG00000029684, ENSMUSG00000072258, ENSMUSG00000059475, ENSMUSG00000013089, ENSMUSG00000033623, ENSMUSG00000031659, ENSMUSG00000026740, ENSMUSG00000057093, ENSMUSG00000051451, ENSMUSG00000022255, ENSMUSG00000006599, ENSMUSG00000019897, ENSMUSG00000021149,…	1.61224	3.08553e-10	11.5107
GOTERM_BP_5	GO:0045449~regulation of transcription	184	2.97177e-13	ENSMUSG00000027387, ENSMUSG00000025616, ENSMUSG00000020074, ENSMUSG00000050855, ENSMUSG00000002147, ENSMUSG00000026739, ENSMUSG00000018501, ENSMUSG00000031715, ENSMUSG00000028389, ENSMUSG00000034101, ENSMUSG00000039841, ENSMUSG00000029238, ENSMUSG00000026058, ENSMUSG00000042197, ENSMUSG00000029684, ENSMUSG00000059475, ENSMUSG00000072258, ENSMUSG00000063108, ENSMUSG00000027582, ENSMUSG00000025316,…	1.65137	4.80238e-10	11.3185
GOTERM_BP_5	GO:0016568~chromatin modification	37	1.78163e-09	ENSMUSG00000002028, ENSMUSG00000031422, ENSMUSG00000056216, ENSMUSG00000028693, ENSMUSG00000040363, ENSMUSG00000049327, ENSMUSG00000057406, ENSMUSG00000018476, ENSMUSG00000025616, ENSMUSG00000026739, ENSMUSG00000027671, ENSMUSG00000031715, ENSMUSG00000018501, ENSMUSG00000063049, ENSMUSG00000040481, ENSMUSG00000029004, ENSMUSG00000056608, ENSMUSG00000020694, ENSMUSG00000035021, ENSMUSG00000025878,…	3.13355	2.87881e-06	7.54079
GOTERM_BP_5	GO:0044267~cellular protein metabolic process	161	3.97861e-09	ENSMUSG00000032307, ENSMUSG00000024360, ENSMUSG00000025060, ENSMUSG00000053137, ENSMUSG00000000740, ENSMUSG00000025616, ENSMUSG00000015656, ENSMUSG00000026739, ENSMUSG00000030451, ENSMUSG00000028156, ENSMUSG00000031878, ENSMUSG00000036432, ENSMUSG00000035764, ENSMUSG00000024639, ENSMUSG00000032905, ENSMUSG00000019977, ENSMUSG00000037470, ENSMUSG00000041264, ENSMUSG00000031644, ENSMUSG00000028788,…	1.54114	6.42874e-06	7.19187
GOTERM_BP_5	GO:0006396~RNA processing	52	1.17788e-08	ENSMUSG00000029817, ENSMUSG00000079470, ENSMUSG00000021413, ENSMUSG00000022023, ENSMUSG00000028676, ENSMUSG00000060475, ENSMUSG00000037262, ENSMUSG00000030888, ENSMUSG00000034724, ENSMUSG00000021039, ENSMUSG00000029169, ENSMUSG00000056962, ENSMUSG00000031590, ENSMUSG00000024095, ENSMUSG00000068882, ENSMUSG00000024097, ENSMUSG00000029227, ENSMUSG00000018379, ENSMUSG00000029701, ENSMUSG00000037364,…	2.37831	1.90325e-05	6.7205
GOTERM_BP_5	GO:0016071~mRNA metabolic process	41	1.45986e-08	ENSMUSG00000042772, ENSMUSG00000029817, ENSMUSG00000056216, ENSMUSG00000033565, ENSMUSG00000027905, ENSMUSG00000021413, ENSMUSG00000020863, ENSMUSG00000032621, ENSMUSG00000022023, ENSMUSG00000022160, ENSMUSG00000028676, ENSMUSG00000028842, ENSMUSG00000032423, ENSMUSG00000061136, ENSMUSG00000028180, ENSMUSG00000028820, ENSMUSG00000035597, ENSMUSG00000037262, ENSMUSG00000060475, ENSMUSG00000071172,…	2.71346	2.35888e-05	6.62729
GOTERM_BP_5	GO:0016070~RNA metabolic process	66	1.03603e-07	ENSMUSG00000029817, ENSMUSG00000079470, ENSMUSG00000021413, ENSMUSG00000022023, ENSMUSG00000022160, ENSMUSG00000028676, ENSMUSG00000028842, ENSMUSG00000022682, ENSMUSG00000037262, ENSMUSG00000060475, ENSMUSG00000030888, ENSMUSG00000072258, ENSMUSG00000034724, ENSMUSG00000021039, ENSMUSG00000029169, ENSMUSG00000056962, ENSMUSG00000031590, ENSMUSG00000021639, ENSMUSG00000024095, ENSMUSG00000068882,…	1.99266	0.000167404	5.77623
GOTERM_BP_5	GO:0043632~modification-dependent macromolecule catabolic process	54	2.55115e-07	ENSMUSG00000032307, ENSMUSG00000003226, ENSMUSG00000039701, ENSMUSG00000026771, ENSMUSG00000025616, ENSMUSG00000030451, ENSMUSG00000031878, ENSMUSG00000036432, ENSMUSG00000004364, ENSMUSG00000035764, ENSMUSG00000032905, ENSMUSG00000032217, ENSMUSG00000041264, ENSMUSG00000028309, ENSMUSG00000024294, ENSMUSG00000035293, ENSMUSG00000022772, ENSMUSG00000041180, ENSMUSG00000026219, ENSMUSG00000031201,…	2.1246	0.000412221	5.38487
GOTERM_BP_5	GO:0006397~mRNA processing	34	8.73976e-07	ENSMUSG00000029817, ENSMUSG00000033565, ENSMUSG00000027905, ENSMUSG00000021413, ENSMUSG00000020863, ENSMUSG00000032621, ENSMUSG00000022023, ENSMUSG00000028676, ENSMUSG00000032423, ENSMUSG00000061136, ENSMUSG00000028180, ENSMUSG00000028820, ENSMUSG00000035597, ENSMUSG00000037262, ENSMUSG00000060475, ENSMUSG00000071172, ENSMUSG00000025982, ENSMUSG00000021431, ENSMUSG00000034724, ENSMUSG00000039218,…	2.59373	0.00141219	4.85011
GOTERM_BP_5	GO:0044257~cellular protein catabolic process	54	1.45103e-06	ENSMUSG00000032307, ENSMUSG00000003226, ENSMUSG00000039701, ENSMUSG00000026771, ENSMUSG00000025616, ENSMUSG00000030451, ENSMUSG00000031878, ENSMUSG00000036432, ENSMUSG00000004364, ENSMUSG00000035764, ENSMUSG00000032905, ENSMUSG00000032217, ENSMUSG00000041264, ENSMUSG00000028309, ENSMUSG00000024294, ENSMUSG00000035293, ENSMUSG00000022772, ENSMUSG00000041180, ENSMUSG00000026219, ENSMUSG00000031201,…	2.00986	0.00234458	4.62993
GOTERM_BP_5	GO:0030163~protein catabolic process	55	1.85394e-06	ENSMUSG00000032307, ENSMUSG00000003226, ENSMUSG00000039701, ENSMUSG00000026771, ENSMUSG00000025616, ENSMUSG00000026775, ENSMUSG00000030451, ENSMUSG00000031878, ENSMUSG00000036432, ENSMUSG00000004364, ENSMUSG00000035764, ENSMUSG00000032905, ENSMUSG00000032217, ENSMUSG00000041264, ENSMUSG00000028309, ENSMUSG00000024294, ENSMUSG00000035293, ENSMUSG00000022772, ENSMUSG00000041180, ENSMUSG00000026219,…	1.97713	0.00299561	4.52351
GOTERM_BP_5	GO:0008380~RNA splicing	28	2.54193e-06	ENSMUSG00000029817, ENSMUSG00000033565, ENSMUSG00000029169, ENSMUSG00000027905, ENSMUSG00000056962, ENSMUSG00000021413, ENSMUSG00000020863, ENSMUSG00000032621, ENSMUSG00000031590, ENSMUSG00000022023, ENSMUSG00000028676, ENSMUSG00000027620, ENSMUSG00000032423, ENSMUSG00000024097, ENSMUSG00000061136, ENSMUSG00000028180, ENSMUSG00000028820, ENSMUSG00000018379, ENSMUSG00000029701, ENSMUSG00000035597,…	2.78425	0.00410724	4.38645
GOTERM_BP_5	GO:0006464~protein modification process	94	6.42979e-05	ENSMUSG00000032307, ENSMUSG00000024360, ENSMUSG00000021413, ENSMUSG00000025060, ENSMUSG00000053137, ENSMUSG00000018476, ENSMUSG00000018209, ENSMUSG00000025616, ENSMUSG00000026739, ENSMUSG00000030451, ENSMUSG00000028207, ENSMUSG00000036432, ENSMUSG00000024639, ENSMUSG00000037470, ENSMUSG00000031644, ENSMUSG00000022698, ENSMUSG00000028788, ENSMUSG00000052889, ENSMUSG00000000416, ENSMUSG00000020038,…	1.49109	0.103844	2.98362
GOTERM_BP_5	GO:0015031~protein transport	53	0.000513164	ENSMUSG00000078185, ENSMUSG00000028385, ENSMUSG00000003226, ENSMUSG00000020128, ENSMUSG00000029616, ENSMUSG00000003037, ENSMUSG00000046230, ENSMUSG00000030082, ENSMUSG00000074909, ENSMUSG00000061244, ENSMUSG00000020671, ENSMUSG00000044465, ENSMUSG00000031600, ENSMUSG00000021124, ENSMUSG00000021062, ENSMUSG00000022538, ENSMUSG00000021025, ENSMUSG00000024789, ENSMUSG00000020876, ENSMUSG00000026878,…	1.6272	0.825968	2.08304
GOTERM_BP_5	GO:0007242~intracellular signaling cascade	69	0.000557168	ENSMUSG00000031442, ENSMUSG00000041624, ENSMUSG00000025658, ENSMUSG00000050711, ENSMUSG00000030357, ENSMUSG00000053137, ENSMUSG00000022951, ENSMUSG00000003037, ENSMUSG00000059866, ENSMUSG00000024639, ENSMUSG00000020372, ENSMUSG00000009621, ENSMUSG00000041261, ENSMUSG00000021552, ENSMUSG00000017418, ENSMUSG00000049907, ENSMUSG00000052889, ENSMUSG00000025199, ENSMUSG00000020671, ENSMUSG00000060477,…	1.50721	0.896495	2.04745
GOTERM_BP_5	GO:0006457~protein folding	17	0.000577063	ENSMUSG00000003226, ENSMUSG00000015757, ENSMUSG00000031197, ENSMUSG00000028035, ENSMUSG00000030357, ENSMUSG00000036052, ENSMUSG00000032525, ENSMUSG00000015656, ENSMUSG00000003814, ENSMUSG00000024359, ENSMUSG00000004460, ENSMUSG00000005483, ENSMUSG00000026740, ENSMUSG00000020048, ENSMUSG00000024222, ENSMUSG00000029657, ENSMUSG00000027804	2.67542	0.928367	2.03228
GOTERM_BP_5	GO:0032869~cellular response to insulin stimulus	9	0.00113703	ENSMUSG00000037112, ENSMUSG00000038894, ENSMUSG00000024539, ENSMUSG00000019699, ENSMUSG00000041417, ENSMUSG00000030671, ENSMUSG00000038485, ENSMUSG00000032253, ENSMUSG00000019970	4.18332	1.8215	1.73957
GOTERM_BP_5	GO:0007264~small GTPase mediated signal transduction	26	0.00116534	ENSMUSG00000031442, ENSMUSG00000003037, ENSMUSG00000034801, ENSMUSG00000009621, ENSMUSG00000017418, ENSMUSG00000049907, ENSMUSG00000008859, ENSMUSG00000020671, ENSMUSG00000028945, ENSMUSG00000021062, ENSMUSG00000030265, ENSMUSG00000024290, ENSMUSG00000054855, ENSMUSG00000026878, ENSMUSG00000024096, ENSMUSG00000020440, ENSMUSG00000028214, ENSMUSG00000030704, ENSMUSG00000051853, ENSMUSG00000020580,…	2.01419	1.86645	1.72898
GOTERM_BP_5	GO:0030522~intracellular receptor-mediated signaling pathway	7	0.0045153	ENSMUSG00000033863, ENSMUSG00000033565, ENSMUSG00000071072, ENSMUSG00000029004, ENSMUSG00000030357, ENSMUSG00000025326, ENSMUSG00000051316	4.37215	7.05151	1.15172
GOTERM_BP_5	GO:0010629~negative regulation of gene expression	34	0.00465313	ENSMUSG00000041483, ENSMUSG00000033565, ENSMUSG00000040363, ENSMUSG00000027905, ENSMUSG00000027387, ENSMUSG00000018476, ENSMUSG00000036052, ENSMUSG00000008305, ENSMUSG00000026739, ENSMUSG00000035877, ENSMUSG00000018501, ENSMUSG00000031715, ENSMUSG00000028842, ENSMUSG00000003382, ENSMUSG00000040481, ENSMUSG00000027177, ENSMUSG00000031609, ENSMUSG00000025878, ENSMUSG00000021039, ENSMUSG00000027582,…	1.65746	7.25923	1.13911
GOTERM_BP_5	GO:0045934~negative regulation of nucleobase, nucleoside, nucleotide and nucleic acid metabolic process	33	0.00521724	ENSMUSG00000041483, ENSMUSG00000033565, ENSMUSG00000040363, ENSMUSG00000027905, ENSMUSG00000027387, ENSMUSG00000021149, ENSMUSG00000018476, ENSMUSG00000036052, ENSMUSG00000008305, ENSMUSG00000026739, ENSMUSG00000035877, ENSMUSG00000018501, ENSMUSG00000028676, ENSMUSG00000031715, ENSMUSG00000003382, ENSMUSG00000040481, ENSMUSG00000027177, ENSMUSG00000031609, ENSMUSG00000025878, ENSMUSG00000021039,…	1.66139	8.10489	1.09125
GOTERM_BP_5	GO:0051172~negative regulation of nitrogen compound metabolic process	33	0.00597005	ENSMUSG00000041483, ENSMUSG00000033565, ENSMUSG00000040363, ENSMUSG00000027905, ENSMUSG00000027387, ENSMUSG00000021149, ENSMUSG00000018476, ENSMUSG00000036052, ENSMUSG00000008305, ENSMUSG00000026739, ENSMUSG00000035877, ENSMUSG00000018501, ENSMUSG00000028676, ENSMUSG00000031715, ENSMUSG00000003382, ENSMUSG00000040481, ENSMUSG00000027177, ENSMUSG00000031609, ENSMUSG00000025878, ENSMUSG00000021039,…	1.64481	9.22216	1.03517
GOTERM_BP_5	GO:0010558~negative regulation of macromolecule biosynthetic process	34	0.00619018	ENSMUSG00000041483, ENSMUSG00000033565, ENSMUSG00000040363, ENSMUSG00000027905, ENSMUSG00000027387, ENSMUSG00000021149, ENSMUSG00000018476, ENSMUSG00000036052, ENSMUSG00000008305, ENSMUSG00000026739, ENSMUSG00000035877, ENSMUSG00000018501, ENSMUSG00000031715, ENSMUSG00000028842, ENSMUSG00000003382, ENSMUSG00000040481, ENSMUSG00000027177, ENSMUSG00000031609, ENSMUSG00000025878, ENSMUSG00000021039,…	1.62573	9.54644	1.02016
GOTERM_BP_5	GO:0016481~negative regulation of transcription	31	0.00659878	ENSMUSG00000041483, ENSMUSG00000033565, ENSMUSG00000040363, ENSMUSG00000027905, ENSMUSG00000027387, ENSMUSG00000018476, ENSMUSG00000036052, ENSMUSG00000008305, ENSMUSG00000026739, ENSMUSG00000035877, ENSMUSG00000018501, ENSMUSG00000031715, ENSMUSG00000003382, ENSMUSG00000040481, ENSMUSG00000027177, ENSMUSG00000031609, ENSMUSG00000025878, ENSMUSG00000021039, ENSMUSG00000027582, ENSMUSG00000048490,…	1.66558	10.1455
GOTERM_BP_5	GO:0031324~negative regulation of cellular metabolic process	38	0.00775566	ENSMUSG00000041483, ENSMUSG00000040363, ENSMUSG00000033565, ENSMUSG00000027905, ENSMUSG00000027387, ENSMUSG00000021149, ENSMUSG00000018476, ENSMUSG00000036052, ENSMUSG00000008305, ENSMUSG00000026739, ENSMUSG00000035877, ENSMUSG00000018501, ENSMUSG00000028676, ENSMUSG00000031715, ENSMUSG00000028842, ENSMUSG00000003382, ENSMUSG00000040481, ENSMUSG00000027177, ENSMUSG00000016481, ENSMUSG00000031609,…	1.55318	11.8215
GOTERM_BP_5	GO:0032868~response to insulin stimulus	9	0.00864614	ENSMUSG00000037112, ENSMUSG00000038894, ENSMUSG00000024539, ENSMUSG00000019699, ENSMUSG00000041417, ENSMUSG00000030671, ENSMUSG00000038485, ENSMUSG00000032253, ENSMUSG00000019970	3.04886	13.0915
GOTERM_BP_5	GO:0031327~negative regulation of cellular biosynthetic process	34	0.0093523	ENSMUSG00000041483, ENSMUSG00000033565, ENSMUSG00000040363, ENSMUSG00000027905, ENSMUSG00000027387, ENSMUSG00000021149, ENSMUSG00000018476, ENSMUSG00000036052, ENSMUSG00000008305, ENSMUSG00000026739, ENSMUSG00000035877, ENSMUSG00000018501, ENSMUSG00000031715, ENSMUSG00000028842, ENSMUSG00000003382, ENSMUSG00000040481, ENSMUSG00000027177, ENSMUSG00000031609, ENSMUSG00000025878, ENSMUSG00000021039,…	1.58037	14.0864
GOTERM_BP_5	GO:0009890~negative regulation of biosynthetic process	34	0.0105967	ENSMUSG00000041483, ENSMUSG00000033565, ENSMUSG00000040363, ENSMUSG00000027905, ENSMUSG00000027387, ENSMUSG00000021149, ENSMUSG00000018476, ENSMUSG00000036052, ENSMUSG00000008305, ENSMUSG00000026739, ENSMUSG00000035877, ENSMUSG00000018501, ENSMUSG00000031715, ENSMUSG00000028842, ENSMUSG00000003382, ENSMUSG00000040481, ENSMUSG00000027177, ENSMUSG00000031609, ENSMUSG00000025878, ENSMUSG00000021039,…	1.5658	15.8137
GOTERM_BP_5	GO:0008286~insulin receptor signaling pathway	6	0.0115607	ENSMUSG00000037112, ENSMUSG00000038894, ENSMUSG00000024539, ENSMUSG00000041417, ENSMUSG00000038485, ENSMUSG00000032253	4.28292	17.1293
GOTERM_BP_5	GO:0051253~negative regulation of RNA metabolic process	26	0.0124793	ENSMUSG00000040363, ENSMUSG00000027905, ENSMUSG00000018476, ENSMUSG00000036052, ENSMUSG00000008305, ENSMUSG00000026739, ENSMUSG00000035877, ENSMUSG00000018501, ENSMUSG00000028676, ENSMUSG00000031715, ENSMUSG00000003382, ENSMUSG00000040481, ENSMUSG00000027177, ENSMUSG00000031609, ENSMUSG00000027582, ENSMUSG00000048490, ENSMUSG00000027660, ENSMUSG00000043991, ENSMUSG00000066687, ENSMUSG00000055866,…	1.67633	18.3651
GOTERM_BP_5	GO:0010605~negative regulation of macromolecule metabolic process	38	0.0126167	ENSMUSG00000041483, ENSMUSG00000033565, ENSMUSG00000040363, ENSMUSG00000027905, ENSMUSG00000027387, ENSMUSG00000021149, ENSMUSG00000018476, ENSMUSG00000036052, ENSMUSG00000008305, ENSMUSG00000026739, ENSMUSG00000035877, ENSMUSG00000018501, ENSMUSG00000028676, ENSMUSG00000031715, ENSMUSG00000028842, ENSMUSG00000003382, ENSMUSG00000040481, ENSMUSG00000027177, ENSMUSG00000016481, ENSMUSG00000031609,…	1.501	18.5483
GOTERM_BP_5	GO:0000087~M phase of mitotic cell cycle	18	0.0173302	ENSMUSG00000028896, ENSMUSG00000001833, ENSMUSG00000022141, ENSMUSG00000049327, ENSMUSG00000025862, ENSMUSG00000025616, ENSMUSG00000036779, ENSMUSG00000026491, ENSMUSG00000031644, ENSMUSG00000032534, ENSMUSG00000024045, ENSMUSG00000029202, ENSMUSG00000072082, ENSMUSG00000056919, ENSMUSG00000022601, ENSMUSG00000037286, ENSMUSG00000024974, ENSMUSG00000030079	1.85446	24.6089
GOTERM_CC_5	GO:0005634~nucleus	373	1.54162e-39	ENSMUSG00000025616, ENSMUSG00000022951, ENSMUSG00000050855, ENSMUSG00000025104, ENSMUSG00000026739, ENSMUSG00000018501, ENSMUSG00000038696, ENSMUSG00000036432, ENSMUSG00000026058, ENSMUSG00000031644, ENSMUSG00000042197, ENSMUSG00000029684, ENSMUSG00000037262, ENSMUSG00000059475, ENSMUSG00000072258, ENSMUSG00000019970, ENSMUSG00000029169, ENSMUSG00000028309, ENSMUSG00000035293, ENSMUSG00000013089,…	1.77226	2.04174e-36	37.69
GOTERM_CC_5	GO:0043229~intracellular organelle	531	6.29658e-27	ENSMUSG00000025616, ENSMUSG00000024261, ENSMUSG00000022951, ENSMUSG00000025104, ENSMUSG00000018501, ENSMUSG00000038696, ENSMUSG00000026058, ENSMUSG00000029684, ENSMUSG00000037262, ENSMUSG00000059475, ENSMUSG00000072258, ENSMUSG00000019970, ENSMUSG00000024259, ENSMUSG00000028309, ENSMUSG00000035293, ENSMUSG00000013089, ENSMUSG00000024359, ENSMUSG00000051853, ENSMUSG00000020706, ENSMUSG00000042043,…	1.32991	8.33925e-24	25.0789
GOTERM_CC_5	GO:0043231~intracellular membrane-bounded organelle	487	4.89356e-26	ENSMUSG00000025616, ENSMUSG00000024261, ENSMUSG00000022951, ENSMUSG00000025104, ENSMUSG00000018501, ENSMUSG00000038696, ENSMUSG00000026058, ENSMUSG00000029684, ENSMUSG00000037262, ENSMUSG00000059475, ENSMUSG00000072258, ENSMUSG00000019970, ENSMUSG00000024259, ENSMUSG00000028309, ENSMUSG00000035293, ENSMUSG00000013089, ENSMUSG00000024359, ENSMUSG00000051853, ENSMUSG00000020706, ENSMUSG00000022255,…	1.37623	6.48107e-23	24.1884
GOTERM_CC_5	GO:0044428~nuclear part	128	2.32793e-16	ENSMUSG00000020074, ENSMUSG00000026739, ENSMUSG00000020076, ENSMUSG00000018501, ENSMUSG00000031715, ENSMUSG00000027193, ENSMUSG00000030451, ENSMUSG00000029238, ENSMUSG00000037262, ENSMUSG00000072258, ENSMUSG00000038612, ENSMUSG00000029169, ENSMUSG00000035293, ENSMUSG00000031590, ENSMUSG00000022772, ENSMUSG00000021639, ENSMUSG00000000838, ENSMUSG00000060445, ENSMUSG00000018379, ENSMUSG00000029701,…	2.11465	2.88658e-13	14.5396
GOTERM_CC_5	GO:0070013~intracellular organelle lumen	111	1.02823e-12	ENSMUSG00000029616, ENSMUSG00000026739, ENSMUSG00000020076, ENSMUSG00000025823, ENSMUSG00000037470, ENSMUSG00000029238, ENSMUSG00000020571, ENSMUSG00000037262, ENSMUSG00000072258, ENSMUSG00000038612, ENSMUSG00000049225, ENSMUSG00000035293, ENSMUSG00000031590, ENSMUSG00000021639, ENSMUSG00000022772, ENSMUSG00000000838, ENSMUSG00000026740, ENSMUSG00000018379, ENSMUSG00000029701, ENSMUSG00000070544,…	2.0086	1.36173e-09	10.8659
GOTERM_CC_5	GO:0031981~nuclear lumen	93	1.94393e-12	ENSMUSG00000079470, ENSMUSG00000026917, ENSMUSG00000022023, ENSMUSG00000037236, ENSMUSG00000026739, ENSMUSG00000022160, ENSMUSG00000028676, ENSMUSG00000017485, ENSMUSG00000020076, ENSMUSG00000028291, ENSMUSG00000063049, ENSMUSG00000032215, ENSMUSG00000029238, ENSMUSG00000027829, ENSMUSG00000031609, ENSMUSG00000037262, ENSMUSG00000060475, ENSMUSG00000072258, ENSMUSG00000030888, ENSMUSG00000038612,…	2.15934	2.57451e-09	10.5893
GOTERM_CC_5	GO:0044446~intracellular organelle part	216	5.51455e-08	ENSMUSG00000026739, ENSMUSG00000018501, ENSMUSG00000037262, ENSMUSG00000072258, ENSMUSG00000031788, ENSMUSG00000049225, ENSMUSG00000024259, ENSMUSG00000029169, ENSMUSG00000035293, ENSMUSG00000022772, ENSMUSG00000026740, ENSMUSG00000031799, ENSMUSG00000020706, ENSMUSG00000042043, ENSMUSG00000027248, ENSMUSG00000022255, ENSMUSG00000006599, ENSMUSG00000020709, ENSMUSG00000030521, ENSMUSG00000032624,…	1.3865	7.30352e-05	6.13647
GOTERM_CC_5	GO:0016604~nuclear body	25	8.60053e-08	ENSMUSG00000027905, ENSMUSG00000008301, ENSMUSG00000020863, ENSMUSG00000022023, ENSMUSG00000025423, ENSMUSG00000026739, ENSMUSG00000022160, ENSMUSG00000028676, ENSMUSG00000061136, ENSMUSG00000027177, ENSMUSG00000029004, ENSMUSG00000027829, ENSMUSG00000032239, ENSMUSG00000029068, ENSMUSG00000039218, ENSMUSG00000040782, ENSMUSG00000022538, ENSMUSG00000030016, ENSMUSG00000031590, ENSMUSG00000039456,…	3.60953	0.000113906	5.94345
GOTERM_CC_5	GO:0005737~cytoplasm	382	1.65385e-07	ENSMUSG00000018199, ENSMUSG00000024360, ENSMUSG00000024261, ENSMUSG00000022951, ENSMUSG00000025104, ENSMUSG00000032252, ENSMUSG00000026739, ENSMUSG00000018501, ENSMUSG00000038696, ENSMUSG00000032503, ENSMUSG00000036432, ENSMUSG00000059866, ENSMUSG00000032905, ENSMUSG00000061244, ENSMUSG00000031644, ENSMUSG00000029684, ENSMUSG00000037262, ENSMUSG00000031788, ENSMUSG00000049225, ENSMUSG00000019970,…	1.21086	0.000219037	5.65948
GOTERM_CC_5	GO:0005788~endoplasmic reticulum lumen	16	1.53202e-06	ENSMUSG00000018906, ENSMUSG00000048482, ENSMUSG00000029616, ENSMUSG00000003814, ENSMUSG00000070436, ENSMUSG00000025823, ENSMUSG00000004460, ENSMUSG00000026864, ENSMUSG00000043019, ENSMUSG00000037470, ENSMUSG00000026740, ENSMUSG00000020571, ENSMUSG00000019916, ENSMUSG00000020048, ENSMUSG00000027248, ENSMUSG00000022769	4.55604	0.002029	4.69272
GOTERM_CC_5	GO:0005654~nucleoplasm	57	1.98414e-06	ENSMUSG00000026917, ENSMUSG00000022023, ENSMUSG00000026739, ENSMUSG00000022160, ENSMUSG00000028676, ENSMUSG00000028291, ENSMUSG00000063049, ENSMUSG00000029238, ENSMUSG00000027829, ENSMUSG00000031609, ENSMUSG00000060475, ENSMUSG00000072258, ENSMUSG00000038612, ENSMUSG00000029068, ENSMUSG00000022538, ENSMUSG00000039473, ENSMUSG00000058440, ENSMUSG00000030016, ENSMUSG00000031590, ENSMUSG00000021639,…	1.95096	0.00262778	4.58041
GOTERM_CC_5	GO:0044451~nucleoplasm part	50	4.85269e-06	ENSMUSG00000002028, ENSMUSG00000027905, ENSMUSG00000020863, ENSMUSG00000008301, ENSMUSG00000026917, ENSMUSG00000055116, ENSMUSG00000022023, ENSMUSG00000008305, ENSMUSG00000025423, ENSMUSG00000026739, ENSMUSG00000027671, ENSMUSG00000022160, ENSMUSG00000028676, ENSMUSG00000028291, ENSMUSG00000063049, ENSMUSG00000003382, ENSMUSG00000061136, ENSMUSG00000029238, ENSMUSG00000027177, ENSMUSG00000029004,…	1.99826	0.00642675	4.19201
GOTERM_CC_5	GO:0005730~nucleolus	32	0.000117979	ENSMUSG00000079470, ENSMUSG00000021149, ENSMUSG00000030521, ENSMUSG00000020205, ENSMUSG00000058558, ENSMUSG00000017485, ENSMUSG00000020076, ENSMUSG00000028729, ENSMUSG00000032215, ENSMUSG00000060475, ENSMUSG00000022185, ENSMUSG00000072258, ENSMUSG00000030888, ENSMUSG00000063785, ENSMUSG00000020923, ENSMUSG00000033285, ENSMUSG00000054079, ENSMUSG00000035293, ENSMUSG00000027714, ENSMUSG00000022772,…	2.11635	0.156139	2.80649
GOTERM_CC_5	GO:0030529~ribonucleoprotein complex	42	0.000151093	ENSMUSG00000018199, ENSMUSG00000027905, ENSMUSG00000079470, ENSMUSG00000021413, ENSMUSG00000030521, ENSMUSG00000032621, ENSMUSG00000000740, ENSMUSG00000039630, ENSMUSG00000022023, ENSMUSG00000058558, ENSMUSG00000003814, ENSMUSG00000027193, ENSMUSG00000028842, ENSMUSG00000032423, ENSMUSG00000032215, ENSMUSG00000060938, ENSMUSG00000022601, ENSMUSG00000063785, ENSMUSG00000025982, ENSMUSG00000021431,…	1.86383	0.199924	2.69914
GOTERM_CC_5	GO:0044432~endoplasmic reticulum part	25	0.000386099	ENSMUSG00000018906, ENSMUSG00000048482, ENSMUSG00000022136, ENSMUSG00000029616, ENSMUSG00000032437, ENSMUSG00000003814, ENSMUSG00000070436, ENSMUSG00000001467, ENSMUSG00000025823, ENSMUSG00000028207, ENSMUSG00000004460, ENSMUSG00000026864, ENSMUSG00000056050, ENSMUSG00000037470, ENSMUSG00000043019, ENSMUSG00000026740, ENSMUSG00000031232, ENSMUSG00000032239, ENSMUSG00000020571, ENSMUSG00000057329,…	2.21885	0.510147	2.2923
GOTERM_CC_5	GO:0034399~nuclear periphery	10	0.000521433	ENSMUSG00000062075, ENSMUSG00000028820, ENSMUSG00000024498, ENSMUSG00000024045, ENSMUSG00000037262, ENSMUSG00000037236, ENSMUSG00000002625, ENSMUSG00000006678, ENSMUSG00000024974, ENSMUSG00000026491	4.18411	0.688391	2.16216
GOTERM_CC_5	GO:0016363~nuclear matrix	9	0.000823359	ENSMUSG00000028820, ENSMUSG00000024498, ENSMUSG00000024045, ENSMUSG00000037262, ENSMUSG00000037236, ENSMUSG00000002625, ENSMUSG00000006678, ENSMUSG00000024974, ENSMUSG00000026491	4.39332	1.08498	1.96458
GOTERM_CC_5	GO:0005815~microtubule organizing center	21	0.00091436	ENSMUSG00000021693, ENSMUSG00000036403, ENSMUSG00000026504, ENSMUSG00000062563, ENSMUSG00000024290, ENSMUSG00000021068, ENSMUSG00000052397, ENSMUSG00000020463, ENSMUSG00000033257, ENSMUSG00000001105, ENSMUSG00000022280, ENSMUSG00000032534, ENSMUSG00000041846, ENSMUSG00000020580, ENSMUSG00000056919, ENSMUSG00000021699, ENSMUSG00000011831, ENSMUSG00000018736, ENSMUSG00000052144, ENSMUSG00000021597,…	2.27802	1.20423	1.91929
GOTERM_CC_5	GO:0005681~spliceosome	16	0.00101308	ENSMUSG00000027905, ENSMUSG00000029169, ENSMUSG00000021413, ENSMUSG00000032621, ENSMUSG00000031590, ENSMUSG00000022023, ENSMUSG00000027193, ENSMUSG00000032423, ENSMUSG00000018379, ENSMUSG00000029701, ENSMUSG00000041837, ENSMUSG00000025982, ENSMUSG00000021431, ENSMUSG00000039218, ENSMUSG00000021039, ENSMUSG00000028945	2.64544	1.33344	1.87503
GOTERM_CC_5	GO:0005813~centrosome	18	0.00205968	ENSMUSG00000021693, ENSMUSG00000036403, ENSMUSG00000026504, ENSMUSG00000024290, ENSMUSG00000021068, ENSMUSG00000020463, ENSMUSG00000022280, ENSMUSG00000001105, ENSMUSG00000032534, ENSMUSG00000041846, ENSMUSG00000020580, ENSMUSG00000056919, ENSMUSG00000021699, ENSMUSG00000011831, ENSMUSG00000018736, ENSMUSG00000052144, ENSMUSG00000021597, ENSMUSG00000024068	2.30649	2.69373	1.56965
GOTERM_CC_5	GO:0048770~pigment granule	12	0.00269887	ENSMUSG00000020571, ENSMUSG00000029616, ENSMUSG00000015656, ENSMUSG00000020048, ENSMUSG00000058799, ENSMUSG00000018326, ENSMUSG00000025823, ENSMUSG00000027248, ENSMUSG00000041794, ENSMUSG00000037720, ENSMUSG00000026864, ENSMUSG00000022285	2.89442	3.51594	1.45396
GOTERM_CC_5	GO:0005635~nuclear envelope	17	0.00322694	ENSMUSG00000003226, ENSMUSG00000062075, ENSMUSG00000020074, ENSMUSG00000009470, ENSMUSG00000006678, ENSMUSG00000024095, ENSMUSG00000026491, ENSMUSG00000063550, ENSMUSG00000006005, ENSMUSG00000026021, ENSMUSG00000022855, ENSMUSG00000026353, ENSMUSG00000057329, ENSMUSG00000014226, ENSMUSG00000018736, ENSMUSG00000020290, ENSMUSG00000000531	2.27802	4.19037	1.37775
GOTERM_CC_5	GO:0031410~cytoplasmic vesicle	40	0.0032481	ENSMUSG00000048482, ENSMUSG00000029616, ENSMUSG00000020205, ENSMUSG00000024261, ENSMUSG00000020530, ENSMUSG00000015656, ENSMUSG00000018326, ENSMUSG00000025823, ENSMUSG00000038696, ENSMUSG00000024743, ENSMUSG00000041794, ENSMUSG00000037720, ENSMUSG00000026864, ENSMUSG00000056429, ENSMUSG00000032181, ENSMUSG00000025192, ENSMUSG00000036591, ENSMUSG00000020571, ENSMUSG00000033792, ENSMUSG00000000416,…	1.61434	4.21731	1.37496
GOTERM_CC_5	GO:0043232~intracellular non-membrane-bounded organelle	118	0.0051392	ENSMUSG00000000740, ENSMUSG00000020076, ENSMUSG00000029684, ENSMUSG00000072258, ENSMUSG00000056919, ENSMUSG00000031788, ENSMUSG00000021597, ENSMUSG00000028309, ENSMUSG00000035293, ENSMUSG00000024789, ENSMUSG00000021068, ENSMUSG00000054855, ENSMUSG00000022772, ENSMUSG00000000838, ENSMUSG00000020601, ENSMUSG00000060445, ENSMUSG00000029701, ENSMUSG00000070544, ENSMUSG00000020580, ENSMUSG00000055254,…	1.26069	6.59633	1.1807
GOTERM_CC_5	GO:0016023~cytoplasmic membrane-bounded vesicle	33	0.00671131	ENSMUSG00000048482, ENSMUSG00000029616, ENSMUSG00000020205, ENSMUSG00000024261, ENSMUSG00000020530, ENSMUSG00000015656, ENSMUSG00000025823, ENSMUSG00000018326, ENSMUSG00000038696, ENSMUSG00000024743, ENSMUSG00000041794, ENSMUSG00000037720, ENSMUSG00000026864, ENSMUSG00000056429, ENSMUSG00000032181, ENSMUSG00000033792, ENSMUSG00000020571, ENSMUSG00000000416, ENSMUSG00000058799, ENSMUSG00000022285,…	1.63423	8.53235	1.06893
GOTERM_CC_5	GO:0016585~chromatin remodeling complex	8	0.0101638	ENSMUSG00000002748, ENSMUSG00000031609, ENSMUSG00000031099, ENSMUSG00000048490, ENSMUSG00000027671, ENSMUSG00000031715, ENSMUSG00000063049, ENSMUSG00000066900	3.28035	12.6546
GOTERM_CC_5	GO:0070822~Sin3-type complex	3	0.0133099	ENSMUSG00000031609, ENSMUSG00000063049, ENSMUSG00000066900	15.3766	16.2606
GOTERM_CC_5	GO:0000228~nuclear chromosome	13	0.0148651	ENSMUSG00000043991, ENSMUSG00000026484, ENSMUSG00000060445, ENSMUSG00000017548, ENSMUSG00000041408, ENSMUSG00000031609, ENSMUSG00000024045, ENSMUSG00000035021, ENSMUSG00000006678, ENSMUSG00000063049, ENSMUSG00000066900, ENSMUSG00000024974, ENSMUSG00000031229	2.20271	17.992
GOTERM_CC_5	GO:0005694~chromosome	29	0.018192	ENSMUSG00000021413, ENSMUSG00000049327, ENSMUSG00000041408, ENSMUSG00000017485, ENSMUSG00000024943, ENSMUSG00000063049, ENSMUSG00000040681, ENSMUSG00000056608, ENSMUSG00000031609, ENSMUSG00000035021, ENSMUSG00000039219, ENSMUSG00000002748, ENSMUSG00000001833, ENSMUSG00000028309, ENSMUSG00000002625, ENSMUSG00000006678, ENSMUSG00000066900, ENSMUSG00000031229, ENSMUSG00000026491, ENSMUSG00000043991,…	1.57292	21.585
GOTERM_MF_5	GO:0046914~transition metal ion binding	175	1.27231e-10	ENSMUSG00000021071, ENSMUSG00000027387, ENSMUSG00000032582, ENSMUSG00000025616, ENSMUSG00000050855, ENSMUSG00000026739, ENSMUSG00000053907, ENSMUSG00000001467, ENSMUSG00000030451, ENSMUSG00000028389, ENSMUSG00000036432, ENSMUSG00000039841, ENSMUSG00000042599, ENSMUSG00000009621, ENSMUSG00000041261, ENSMUSG00000042197, ENSMUSG00000037262, ENSMUSG00000059475, ENSMUSG00000063108, ENSMUSG00000027582,…	1.53105	1.52796e-07	8.81589
GOTERM_MF_5	GO:0032559~adenyl ribonucleotide binding	104	2.59314e-07	ENSMUSG00000032307, ENSMUSG00000025060, ENSMUSG00000053137, ENSMUSG00000053289, ENSMUSG00000015656, ENSMUSG00000053907, ENSMUSG00000031715, ENSMUSG00000020076, ENSMUSG00000031644, ENSMUSG00000058006, ENSMUSG00000025199, ENSMUSG00000031788, ENSMUSG00000019970, ENSMUSG00000029169, ENSMUSG00000024789, ENSMUSG00000032570, ENSMUSG00000030849, ENSMUSG00000060733, ENSMUSG00000024359, ENSMUSG00000031659,…	1.62532	0.00031142	5.50665
GOTERM_MF_5	GO:0004672~protein kinase activity	43	0.000922622	ENSMUSG00000016179, ENSMUSG00000024242, ENSMUSG00000037112, ENSMUSG00000021413, ENSMUSG00000025060, ENSMUSG00000053137, ENSMUSG00000018209, ENSMUSG00000030272, ENSMUSG00000027177, ENSMUSG00000031644, ENSMUSG00000000416, ENSMUSG00000052889, ENSMUSG00000020694, ENSMUSG00000017291, ENSMUSG00000025199, ENSMUSG00000042608, ENSMUSG00000022607, ENSMUSG00000060477, ENSMUSG00000019970, ENSMUSG00000024576,…	1.6829	1.1024	1.95766
GOTERM_MF_5	GO:0003756~protein disulfide isomerase activity	4	0.0039454	ENSMUSG00000020571, ENSMUSG00000024614, ENSMUSG00000025823, ENSMUSG00000027248	11.4085	4.63661	1.3338
GOTERM_MF_5	GO:0032561~guanyl ribonucleotide binding	26	0.0164077	ENSMUSG00000021149, ENSMUSG00000030357, ENSMUSG00000003037, ENSMUSG00000024639, ENSMUSG00000019977, ENSMUSG00000017418, ENSMUSG00000049907, ENSMUSG00000008859, ENSMUSG00000020671, ENSMUSG00000022911, ENSMUSG00000028945, ENSMUSG00000001833, ENSMUSG00000022538, ENSMUSG00000021062, ENSMUSG00000030265, ENSMUSG00000021068, ENSMUSG00000028527, ENSMUSG00000054855, ENSMUSG00000026878, ENSMUSG00000020440,…	1.63427	18.0189
GOTERM_MF_5	GO:0019787~small conjugating protein ligase activity	12	0.0208454	ENSMUSG00000032307, ENSMUSG00000026484, ENSMUSG00000024294, ENSMUSG00000026021, ENSMUSG00000035293, ENSMUSG00000024817, ENSMUSG00000020659, ENSMUSG00000025423, ENSMUSG00000026739, ENSMUSG00000030451, ENSMUSG00000025326, ENSMUSG00000036432	2.19043	22.3521
PANTHER_BP_ALL	BP00031:Nucleoside, nucleotide and nucleic acid metabolism	219	8.47149e-15	ENSMUSG00000018199, ENSMUSG00000053289, ENSMUSG00000026739, ENSMUSG00000018501, ENSMUSG00000032503, ENSMUSG00000042197, ENSMUSG00000059475, ENSMUSG00000029169, ENSMUSG00000035293, ENSMUSG00000042712, ENSMUSG00000013089, ENSMUSG00000033623, ENSMUSG00000031659, ENSMUSG00000057093, ENSMUSG00000051451, ENSMUSG00000020706, ENSMUSG00000020608, ENSMUSG00000021111, ENSMUSG00000006599, ENSMUSG00000049516,…	1.61048	1.03473e-11	12.9852
PANTHER_BP_ALL	BP00062:Protein folding	26	6.08947e-09	ENSMUSG00000028035, ENSMUSG00000030357, ENSMUSG00000036052, ENSMUSG00000015656, ENSMUSG00000032525, ENSMUSG00000003814, ENSMUSG00000026864, ENSMUSG00000020288, ENSMUSG00000027808, ENSMUSG00000024222, ENSMUSG00000027804, ENSMUSG00000015757, ENSMUSG00000031197, ENSMUSG00000005936, ENSMUSG00000020361, ENSMUSG00000030847, ENSMUSG00000024359, ENSMUSG00000004460, ENSMUSG00000005483, ENSMUSG00000022403,…	3.99321	7.4654e-06	7.12695
PANTHER_BP_ALL	BP00040:mRNA transcription	117	1.41842e-05	ENSMUSG00000002147, ENSMUSG00000026739, ENSMUSG00000031715, ENSMUSG00000018501, ENSMUSG00000028389, ENSMUSG00000029238, ENSMUSG00000042197, ENSMUSG00000059475, ENSMUSG00000037475, ENSMUSG00000035293, ENSMUSG00000078870, ENSMUSG00000020484, ENSMUSG00000074220, ENSMUSG00000042712, ENSMUSG00000013089, ENSMUSG00000021639, ENSMUSG00000004897, ENSMUSG00000033623, ENSMUSG00000037876, ENSMUSG00000070544,…	1.46689	0.0173878	3.75976
PANTHER_BP_ALL	BP00203:Cell cycle	66	2.08454e-05	ENSMUSG00000030357, ENSMUSG00000017485, ENSMUSG00000063049, ENSMUSG00000031878, ENSMUSG00000004364, ENSMUSG00000040681, ENSMUSG00000026434, ENSMUSG00000027829, ENSMUSG00000030584, ENSMUSG00000025856, ENSMUSG00000023067, ENSMUSG00000029068, ENSMUSG00000024222, ENSMUSG00000036403, ENSMUSG00000036990, ENSMUSG00000024293, ENSMUSG00000024789, ENSMUSG00000024290, ENSMUSG00000002625, ENSMUSG00000024096,…	1.71063	0.0255525	3.59257
PANTHER_BP_ALL	BP00060:Protein metabolism and modification	171	3.01706e-05	ENSMUSG00000032307, ENSMUSG00000018199, ENSMUSG00000021071, ENSMUSG00000024360, ENSMUSG00000025060, ENSMUSG00000020128, ENSMUSG00000053137, ENSMUSG00000000740, ENSMUSG00000025616, ENSMUSG00000015656, ENSMUSG00000039033, ENSMUSG00000032252, ENSMUSG00000025823, ENSMUSG00000001467, ENSMUSG00000030451, ENSMUSG00000038696, ENSMUSG00000028156, ENSMUSG00000028842, ENSMUSG00000031878, ENSMUSG00000036432,…	1.32796	0.0369814	3.43202
PANTHER_BP_ALL	BP00063:Protein modification	78	8.2116e-05	ENSMUSG00000032307, ENSMUSG00000021413, ENSMUSG00000025060, ENSMUSG00000053137, ENSMUSG00000018209, ENSMUSG00000032601, ENSMUSG00000025823, ENSMUSG00000038696, ENSMUSG00000031878, ENSMUSG00000037470, ENSMUSG00000031644, ENSMUSG00000030584, ENSMUSG00000020571, ENSMUSG00000022698, ENSMUSG00000028788, ENSMUSG00000052889, ENSMUSG00000025199, ENSMUSG00000017291, ENSMUSG00000022607, ENSMUSG00000019970,…	1.55935	0.100624	2.9973
PANTHER_BP_ALL	BP00064:Protein phosphorylation	49	0.000367499	ENSMUSG00000016179, ENSMUSG00000024242, ENSMUSG00000037112, ENSMUSG00000021413, ENSMUSG00000025060, ENSMUSG00000053137, ENSMUSG00000018209, ENSMUSG00000032601, ENSMUSG00000038696, ENSMUSG00000030272, ENSMUSG00000021096, ENSMUSG00000027177, ENSMUSG00000031644, ENSMUSG00000028788, ENSMUSG00000052889, ENSMUSG00000020694, ENSMUSG00000019907, ENSMUSG00000017291, ENSMUSG00000025199, ENSMUSG00000042608,…	1.69528	0.449605	2.34717
PANTHER_BP_ALL	BP00125:Intracellular protein traffic	62	0.000452538	ENSMUSG00000078185, ENSMUSG00000028385, ENSMUSG00000053841, ENSMUSG00000021071, ENSMUSG00000029616, ENSMUSG00000026775, ENSMUSG00000024261, ENSMUSG00000003037, ENSMUSG00000056429, ENSMUSG00000074909, ENSMUSG00000017418, ENSMUSG00000030082, ENSMUSG00000061244, ENSMUSG00000031788, ENSMUSG00000020671, ENSMUSG00000021124, ENSMUSG00000073643, ENSMUSG00000021062, ENSMUSG00000021025, ENSMUSG00000020640,…	1.56588	0.553378	2.25698
PANTHER_BP_ALL	BP00282:Mitosis	28	0.000872812	ENSMUSG00000028826, ENSMUSG00000027671, ENSMUSG00000049550, ENSMUSG00000026434, ENSMUSG00000037286, ENSMUSG00000024576, ENSMUSG00000028896, ENSMUSG00000001833, ENSMUSG00000036403, ENSMUSG00000036990, ENSMUSG00000029062, ENSMUSG00000024293, ENSMUSG00000025862, ENSMUSG00000041161, ENSMUSG00000024290, ENSMUSG00000002625, ENSMUSG00000024096, ENSMUSG00000024780, ENSMUSG00000026021, ENSMUSG00000018398,…	1.99516	1.06478	1.97274
PANTHER_BP_ALL	BP00044:mRNA transcription regulation	85	0.00113728	ENSMUSG00000031157, ENSMUSG00000018476, ENSMUSG00000028341, ENSMUSG00000029135, ENSMUSG00000039987, ENSMUSG00000002147, ENSMUSG00000026739, ENSMUSG00000031715, ENSMUSG00000018501, ENSMUSG00000028389, ENSMUSG00000074519, ENSMUSG00000029238, ENSMUSG00000030584, ENSMUSG00000031609, ENSMUSG00000042197, ENSMUSG00000020037, ENSMUSG00000059475, ENSMUSG00000028484, ENSMUSG00000034724, ENSMUSG00000033863,…	1.40312	1.38536	1.85844
PANTHER_BP_ALL	BP00047:Pre-mRNA processing	24	0.0021725	ENSMUSG00000029817, ENSMUSG00000052137, ENSMUSG00000029169, ENSMUSG00000028034, ENSMUSG00000046667, ENSMUSG00000039652, ENSMUSG00000028676, ENSMUSG00000022160, ENSMUSG00000038774, ENSMUSG00000024095, ENSMUSG00000032423, ENSMUSG00000027620, ENSMUSG00000024097, ENSMUSG00000032212, ENSMUSG00000014956, ENSMUSG00000028820, ENSMUSG00000018379, ENSMUSG00000034653, ENSMUSG00000027829, ENSMUSG00000071172,…	1.99829	2.63104	1.57987
PANTHER_BP_ALL	BP00048:mRNA splicing	19	0.00314532	ENSMUSG00000029817, ENSMUSG00000052137, ENSMUSG00000029169, ENSMUSG00000028034, ENSMUSG00000046667, ENSMUSG00000028676, ENSMUSG00000038774, ENSMUSG00000024095, ENSMUSG00000032423, ENSMUSG00000027620, ENSMUSG00000024097, ENSMUSG00000032212, ENSMUSG00000028820, ENSMUSG00000018379, ENSMUSG00000034653, ENSMUSG00000027829, ENSMUSG00000071172, ENSMUSG00000025982, ENSMUSG00000037296	2.15941	3.78846	1.42154
PANTHER_BP_ALL	BP00206:Chromosome segregation	12	0.00319961	ENSMUSG00000024576, ENSMUSG00000036990, ENSMUSG00000024293, ENSMUSG00000026021, ENSMUSG00000025862, ENSMUSG00000041161, ENSMUSG00000028826, ENSMUSG00000024045, ENSMUSG00000040550, ENSMUSG00000002625, ENSMUSG00000037286, ENSMUSG00000024974	2.84132	3.85267	1.41424
PANTHER_BP_ALL	BP00276:General vesicle transport	21	0.00484832	ENSMUSG00000078185, ENSMUSG00000021062, ENSMUSG00000047694, ENSMUSG00000053841, ENSMUSG00000015214, ENSMUSG00000024091, ENSMUSG00000026878, ENSMUSG00000003037, ENSMUSG00000020440, ENSMUSG00000030704, ENSMUSG00000035126, ENSMUSG00000049550, ENSMUSG00000017418, ENSMUSG00000051853, ENSMUSG00000022765, ENSMUSG00000018401, ENSMUSG00000038344, ENSMUSG00000035226, ENSMUSG00000020671, ENSMUSG00000020132,…	1.98067	5.78423	1.23775
PANTHER_BP_ALL	BP00178:Stress response	18	0.00614816	ENSMUSG00000021025, ENSMUSG00000015656, ENSMUSG00000030655, ENSMUSG00000028341, ENSMUSG00000049796, ENSMUSG00000053004, ENSMUSG00000024359, ENSMUSG00000024095, ENSMUSG00000026864, ENSMUSG00000020288, ENSMUSG00000026826, ENSMUSG00000027808, ENSMUSG00000020048, ENSMUSG00000031068, ENSMUSG00000056501, ENSMUSG00000004951, ENSMUSG00000059991, ENSMUSG00000022607	2.07691	7.28186	1.13776
PANTHER_BP_ALL	BP00273:Chromatin packaging and remodeling	16	0.00841106	ENSMUSG00000002028, ENSMUSG00000002748, ENSMUSG00000020923, ENSMUSG00000029920, ENSMUSG00000049516, ENSMUSG00000022141, ENSMUSG00000028693, ENSMUSG00000026987, ENSMUSG00000049327, ENSMUSG00000057406, ENSMUSG00000040481, ENSMUSG00000054823, ENSMUSG00000017548, ENSMUSG00000035021, ENSMUSG00000058799, ENSMUSG00000024974	2.12684	9.83705	1.00714
PANTHER_BP_ALL	BP00207:Cell cycle control	27	0.0229058	ENSMUSG00000037112, ENSMUSG00000052135, ENSMUSG00000030357, ENSMUSG00000031878, ENSMUSG00000063049, ENSMUSG00000004364, ENSMUSG00000038845, ENSMUSG00000030584, ENSMUSG00000025856, ENSMUSG00000023067, ENSMUSG00000024222, ENSMUSG00000029062, ENSMUSG00000003545, ENSMUSG00000038705, ENSMUSG00000024789, ENSMUSG00000027660, ENSMUSG00000030655, ENSMUSG00000019699, ENSMUSG00000028086, ENSMUSG00000031309,…	1.57366	24.7294
PANTHER_MF_ALL	MF00077:Chaperone	25	9.58321e-08	ENSMUSG00000028035, ENSMUSG00000030357, ENSMUSG00000036052, ENSMUSG00000015656, ENSMUSG00000018326, ENSMUSG00000009030, ENSMUSG00000026864, ENSMUSG00000020288, ENSMUSG00000058006, ENSMUSG00000027808, ENSMUSG00000024222, ENSMUSG00000022285, ENSMUSG00000031197, ENSMUSG00000020361, ENSMUSG00000030847, ENSMUSG00000024359, ENSMUSG00000004460, ENSMUSG00000005483, ENSMUSG00000022403, ENSMUSG00000024780,…	3.61111	0.00011815	5.92757
PANTHER_MF_ALL	MF00042:Nucleic acid binding	162	4.25484e-07	ENSMUSG00000029817, ENSMUSG00000018199, ENSMUSG00000024360, ENSMUSG00000020128, ENSMUSG00000032582, ENSMUSG00000000740, ENSMUSG00000039630, ENSMUSG00000053289, ENSMUSG00000002147, ENSMUSG00000020076, ENSMUSG00000018501, ENSMUSG00000031715, ENSMUSG00000028156, ENSMUSG00000028842, ENSMUSG00000019977, ENSMUSG00000026058, ENSMUSG00000042197, ENSMUSG00000029169, ENSMUSG00000035293, ENSMUSG00000021068,…	1.44289	0.000524573	5.28019
PANTHER_MF_ALL	MF00036:Transcription factor	127	4.77874e-07	ENSMUSG00000050855, ENSMUSG00000002147, ENSMUSG00000026739, ENSMUSG00000018501, ENSMUSG00000028389, ENSMUSG00000029238, ENSMUSG00000042197, ENSMUSG00000059475, ENSMUSG00000037475, ENSMUSG00000063108, ENSMUSG00000078870, ENSMUSG00000020484, ENSMUSG00000074220, ENSMUSG00000042712, ENSMUSG00000013089, ENSMUSG00000021639, ENSMUSG00000033623, ENSMUSG00000037876, ENSMUSG00000028634, ENSMUSG00000024817,…	1.53666	0.000589164	5.22976
PANTHER_MF_ALL	MF00079:Other chaperones	14	7.21968e-05	ENSMUSG00000028035, ENSMUSG00000030357, ENSMUSG00000036052, ENSMUSG00000018326, ENSMUSG00000009030, ENSMUSG00000005483, ENSMUSG00000004460, ENSMUSG00000020288, ENSMUSG00000026740, ENSMUSG00000024780, ENSMUSG00000027808, ENSMUSG00000004951, ENSMUSG00000024222, ENSMUSG00000022285	3.78578	0.0889742	3.05074
PANTHER_MF_ALL	MF00107:Kinase	51	0.000118109	ENSMUSG00000021413, ENSMUSG00000025060, ENSMUSG00000018209, ENSMUSG00000053137, ENSMUSG00000031644, ENSMUSG00000052889, ENSMUSG00000017291, ENSMUSG00000025199, ENSMUSG00000022607, ENSMUSG00000060090, ENSMUSG00000019970, ENSMUSG00000060477, ENSMUSG00000024789, ENSMUSG00000024290, ENSMUSG00000030849, ENSMUSG00000060733, ENSMUSG00000031309, ENSMUSG00000051590, ENSMUSG00000020601, ENSMUSG00000025417,…	1.75448	0.145517	2.83709
PANTHER_MF_ALL	MF00222:Zinc finger transcription factor	58	0.000208622	ENSMUSG00000006215, ENSMUSG00000079509, ENSMUSG00000050855, ENSMUSG00000049739, ENSMUSG00000026739, ENSMUSG00000028389, ENSMUSG00000063049, ENSMUSG00000074519, ENSMUSG00000039789, ENSMUSG00000053347, ENSMUSG00000030584, ENSMUSG00000042197, ENSMUSG00000059475, ENSMUSG00000057894, ENSMUSG00000063108, ENSMUSG00000033863, ENSMUSG00000029267, ENSMUSG00000078870, ENSMUSG00000074220, ENSMUSG00000075327,…	1.64691	0.256903	2.59023
PANTHER_MF_ALL	MF00039:Other transcription factor	30	0.000613176	ENSMUSG00000031422, ENSMUSG00000056216, ENSMUSG00000052135, ENSMUSG00000022974, ENSMUSG00000029135, ENSMUSG00000002147, ENSMUSG00000009741, ENSMUSG00000027361, ENSMUSG00000003382, ENSMUSG00000024081, ENSMUSG00000028282, ENSMUSG00000004661, ENSMUSG00000020037, ENSMUSG00000056501, ENSMUSG00000027806, ENSMUSG00000003545, ENSMUSG00000022895, ENSMUSG00000038705, ENSMUSG00000031885, ENSMUSG00000027660,…	1.982	0.753357	2.123
PANTHER_MF_ALL	MF00108:Protein kinase	40	0.000781134	ENSMUSG00000016179, ENSMUSG00000024242, ENSMUSG00000037112, ENSMUSG00000021413, ENSMUSG00000025060, ENSMUSG00000053137, ENSMUSG00000018209, ENSMUSG00000030272, ENSMUSG00000027177, ENSMUSG00000031644, ENSMUSG00000052889, ENSMUSG00000020694, ENSMUSG00000017291, ENSMUSG00000025199, ENSMUSG00000042608, ENSMUSG00000022607, ENSMUSG00000060477, ENSMUSG00000019970, ENSMUSG00000024576, ENSMUSG00000029062,…	1.75183	0.958801	2.01827
PANTHER_MF_ALL	MF00070:Chromatin/chromatin-binding protein	15	0.000871958	ENSMUSG00000031422, ENSMUSG00000028896, ENSMUSG00000020923, ENSMUSG00000049516, ENSMUSG00000022141, ENSMUSG00000025862, ENSMUSG00000031660, ENSMUSG00000040681, ENSMUSG00000060445, ENSMUSG00000031609, ENSMUSG00000030584, ENSMUSG00000022185, ENSMUSG00000029202, ENSMUSG00000037286, ENSMUSG00000024974	2.81317	1.06973	1.97072
PANTHER_MF_ALL	MF00136:Acetyltransferase	12	0.00109651	ENSMUSG00000002748, ENSMUSG00000024293, ENSMUSG00000063273, ENSMUSG00000026987, ENSMUSG00000030850, ENSMUSG00000030584, ENSMUSG00000042719, ENSMUSG00000036282, ENSMUSG00000022698, ENSMUSG00000025283, ENSMUSG00000035021, ENSMUSG00000040481	3.24496	1.3435	1.87176
PANTHER_MF_ALL	MF00169:Other isomerase	10	0.00110061	ENSMUSG00000015757, ENSMUSG00000030357, ENSMUSG00000020571, ENSMUSG00000032525, ENSMUSG00000032252, ENSMUSG00000024614, ENSMUSG00000025823, ENSMUSG00000027248, ENSMUSG00000024222, ENSMUSG00000027804	3.81238	1.34851	1.87015
PANTHER_MF_ALL	MF00065:mRNA processing factor	15	0.00128546	ENSMUSG00000029817, ENSMUSG00000039652, ENSMUSG00000028676, ENSMUSG00000038774, ENSMUSG00000032423, ENSMUSG00000027620, ENSMUSG00000024097, ENSMUSG00000028820, ENSMUSG00000018379, ENSMUSG00000027829, ENSMUSG00000041328, ENSMUSG00000071172, ENSMUSG00000025982, ENSMUSG00000021111, ENSMUSG00000037296	2.70413	1.57334	1.80318
PANTHER_MF_ALL	MF00099:Small GTPase	19	0.00209422	ENSMUSG00000001833, ENSMUSG00000021062, ENSMUSG00000021149, ENSMUSG00000030265, ENSMUSG00000054855, ENSMUSG00000026878, ENSMUSG00000003037, ENSMUSG00000020440, ENSMUSG00000030704, ENSMUSG00000028214, ENSMUSG00000018398, ENSMUSG00000017418, ENSMUSG00000051853, ENSMUSG00000049907, ENSMUSG00000008859, ENSMUSG00000032470, ENSMUSG00000020671, ENSMUSG00000020132, ENSMUSG00000028945	2.24292	2.55153	1.5932
PANTHER_MF_ALL	MF00209:Hsp 70 family chaperone	5	0.00238665	ENSMUSG00000020361, ENSMUSG00000015656, ENSMUSG00000024359, ENSMUSG00000029657, ENSMUSG00000026864	8.30554	2.90302	1.53715
PANTHER_MF_ALL	MF00275:Transcription cofactor	16	0.00470805	ENSMUSG00000032280, ENSMUSG00000026771, ENSMUSG00000048490, ENSMUSG00000031157, ENSMUSG00000008305, ENSMUSG00000018501, ENSMUSG00000063049, ENSMUSG00000055866, ENSMUSG00000026305, ENSMUSG00000041238, ENSMUSG00000027829, ENSMUSG00000037475, ENSMUSG00000021156, ENSMUSG00000028484, ENSMUSG00000039219, ENSMUSG00000030079	2.26883	5.65218	1.24778
PANTHER_MF_ALL	MF00051:Helicase	15	0.00519833	ENSMUSG00000029920, ENSMUSG00000027905, ENSMUSG00000029169, ENSMUSG00000055065, ENSMUSG00000040565, ENSMUSG00000053289, ENSMUSG00000033658, ENSMUSG00000020076, ENSMUSG00000031715, ENSMUSG00000038774, ENSMUSG00000031229, ENSMUSG00000034653, ENSMUSG00000056608, ENSMUSG00000031099, ENSMUSG00000030079	2.32555	6.22358	1.20596
PANTHER_MF_ALL	MF00053:Other RNA-binding protein	18	0.00837505	ENSMUSG00000018199, ENSMUSG00000033565, ENSMUSG00000008301, ENSMUSG00000028034, ENSMUSG00000032582, ENSMUSG00000039630, ENSMUSG00000029141, ENSMUSG00000030016, ENSMUSG00000037236, ENSMUSG00000027680, ENSMUSG00000032212, ENSMUSG00000026305, ENSMUSG00000000838, ENSMUSG00000026058, ENSMUSG00000022201, ENSMUSG00000029701, ENSMUSG00000055531, ENSMUSG00000011257	2.0125	9.84951	1.00659
PANTHER_MF_ALL	MF00213:Non-receptor serine/threonine protein kinase	24	0.00963717	ENSMUSG00000016179, ENSMUSG00000024576, ENSMUSG00000037112, ENSMUSG00000029062, ENSMUSG00000021413, ENSMUSG00000021428, ENSMUSG00000053137, ENSMUSG00000024290, ENSMUSG00000019699, ENSMUSG00000030655, ENSMUSG00000030272, ENSMUSG00000037593, ENSMUSG00000031309, ENSMUSG00000027177, ENSMUSG00000027797, ENSMUSG00000052783, ENSMUSG00000024042, ENSMUSG00000020580, ENSMUSG00000052889, ENSMUSG00000004591,…	1.76624	11.254
PANTHER_MF_ALL	MF00097:G-protein	21	0.0113144	ENSMUSG00000001833, ENSMUSG00000021062, ENSMUSG00000021149, ENSMUSG00000030265, ENSMUSG00000054855, ENSMUSG00000021557, ENSMUSG00000026878, ENSMUSG00000003037, ENSMUSG00000020440, ENSMUSG00000030704, ENSMUSG00000028214, ENSMUSG00000024639, ENSMUSG00000018398, ENSMUSG00000017418, ENSMUSG00000051853, ENSMUSG00000049907, ENSMUSG00000008859, ENSMUSG00000032470, ENSMUSG00000020671, ENSMUSG00000020132,…	1.82909	13.0893
PANTHER_MF_ALL	MF00283:Ubiquitin-protein ligase	17	0.014259	ENSMUSG00000064061, ENSMUSG00000021071, ENSMUSG00000039701, ENSMUSG00000024294, ENSMUSG00000040351, ENSMUSG00000025234, ENSMUSG00000028086, ENSMUSG00000041180, ENSMUSG00000030451, ENSMUSG00000026219, ENSMUSG00000036432, ENSMUSG00000045409, ENSMUSG00000036469, ENSMUSG00000014226, ENSMUSG00000025326, ENSMUSG00000034252, ENSMUSG00000040782	1.94751	16.2272
PANTHER_MF_ALL	MF00068:mRNA splicing factor	10	0.0194692	ENSMUSG00000029817, ENSMUSG00000028820, ENSMUSG00000018379, ENSMUSG00000071172, ENSMUSG00000028676, ENSMUSG00000025982, ENSMUSG00000038774, ENSMUSG00000027620, ENSMUSG00000024097, ENSMUSG00000037296	2.47399	21.5258
PANTHER_MF_ALL	MF00093:Select regulatory molecule	64	0.0207933	ENSMUSG00000031442, ENSMUSG00000078185, ENSMUSG00000025658, ENSMUSG00000031157, ENSMUSG00000032601, ENSMUSG00000021557, ENSMUSG00000003037, ENSMUSG00000017485, ENSMUSG00000038696, ENSMUSG00000024639, ENSMUSG00000009621, ENSMUSG00000026360, ENSMUSG00000050423, ENSMUSG00000074909, ENSMUSG00000027829, ENSMUSG00000017418, ENSMUSG00000049907, ENSMUSG00000021765, ENSMUSG00000023067, ENSMUSG00000020671,…	1.31017	22.8224
KEGG_PATHWAY	mmu05200:Pathways in cancer	28	4.7333e-05	ENSMUSG00000031502, ENSMUSG00000018209, ENSMUSG00000025423, ENSMUSG00000000489, ENSMUSG00000034801, ENSMUSG00000027940, ENSMUSG00000052889, ENSMUSG00000008859, ENSMUSG00000025199, ENSMUSG00000025856, ENSMUSG00000023067, ENSMUSG00000048701, ENSMUSG00000022607, ENSMUSG00000032487, ENSMUSG00000021025, ENSMUSG00000030265, ENSMUSG00000030849, ENSMUSG00000019699, ENSMUSG00000041417, ENSMUSG00000024096,…	2.33527	0.0545643	3.26309
KEGG_PATHWAY	mmu05215:Prostate cancer	13	0.000101939	ENSMUSG00000021025, ENSMUSG00000030265, ENSMUSG00000019699, ENSMUSG00000030849, ENSMUSG00000041417, ENSMUSG00000000489, ENSMUSG00000034801, ENSMUSG00000057329, ENSMUSG00000024122, ENSMUSG00000020048, ENSMUSG00000025856, ENSMUSG00000025199, ENSMUSG00000023067	3.89118	0.117479	2.93004
KEGG_PATHWAY	mmu03040:Spliceosome	15	0.000170706	ENSMUSG00000029817, ENSMUSG00000029169, ENSMUSG00000039630, ENSMUSG00000031157, ENSMUSG00000015656, ENSMUSG00000028676, ENSMUSG00000024097, ENSMUSG00000061136, ENSMUSG00000018379, ENSMUSG00000024498, ENSMUSG00000037475, ENSMUSG00000022185, ENSMUSG00000071172, ENSMUSG00000025982, ENSMUSG00000021039	3.25875	0.196657	2.70629
KEGG_PATHWAY	mmu04010:MAPK signaling pathway	22	0.000700164	ENSMUSG00000024242, ENSMUSG00000048482, ENSMUSG00000030265, ENSMUSG00000053137, ENSMUSG00000018209, ENSMUSG00000030849, ENSMUSG00000015656, ENSMUSG00000019699, ENSMUSG00000015605, ENSMUSG00000000489, ENSMUSG00000034801, ENSMUSG00000021096, ENSMUSG00000031309, ENSMUSG00000031530, ENSMUSG00000021250, ENSMUSG00000055254, ENSMUSG00000052889, ENSMUSG00000025856, ENSMUSG00000025199, ENSMUSG00000017291,…	2.23644	0.804363	2.09455
KEGG_PATHWAY	mmu04722:Neurotrophin signaling pathway	14	0.000946507	ENSMUSG00000031309, ENSMUSG00000021025, ENSMUSG00000048482, ENSMUSG00000038894, ENSMUSG00000030265, ENSMUSG00000053137, ENSMUSG00000055254, ENSMUSG00000057329, ENSMUSG00000019699, ENSMUSG00000041417, ENSMUSG00000018326, ENSMUSG00000034801, ENSMUSG00000060477, ENSMUSG00000022285	2.90112	1.08596	1.96419
KEGG_PATHWAY	mmu04810:Regulation of actin cytoskeleton	19	0.00101375	ENSMUSG00000037926, ENSMUSG00000006304, ENSMUSG00000030265, ENSMUSG00000024290, ENSMUSG00000052397, ENSMUSG00000030849, ENSMUSG00000041417, ENSMUSG00000000489, ENSMUSG00000034801, ENSMUSG00000009621, ENSMUSG00000014956, ENSMUSG00000025417, ENSMUSG00000020580, ENSMUSG00000029684, ENSMUSG00000019907, ENSMUSG00000025856, ENSMUSG00000032470, ENSMUSG00000025372, ENSMUSG00000022607	2.35871	1.1627	1.93453
KEGG_PATHWAY	mmu04510:Focal adhesion	17	0.00252606	ENSMUSG00000031502, ENSMUSG00000024290, ENSMUSG00000019699, ENSMUSG00000041417, ENSMUSG00000000489, ENSMUSG00000057367, ENSMUSG00000034801, ENSMUSG00000009621, ENSMUSG00000014956, ENSMUSG00000020580, ENSMUSG00000057329, ENSMUSG00000052889, ENSMUSG00000019907, ENSMUSG00000024122, ENSMUSG00000025856, ENSMUSG00000022607, ENSMUSG00000026837	2.31294	2.87427	1.54147
KEGG_PATHWAY	mmu05222:Small cell lung cancer	10	0.00389277	ENSMUSG00000031502, ENSMUSG00000021025, ENSMUSG00000057329, ENSMUSG00000025423, ENSMUSG00000019699, ENSMUSG00000041417, ENSMUSG00000025199, ENSMUSG00000022607, ENSMUSG00000057367, ENSMUSG00000032487	3.16929	4.39773	1.35677
KEGG_PATHWAY	mmu03018:RNA degradation	8	0.00622445	ENSMUSG00000027714, ENSMUSG00000020464, ENSMUSG00000035649, ENSMUSG00000024359, ENSMUSG00000034724, ENSMUSG00000021111, ENSMUSG00000038784, ENSMUSG00000037296	3.59186	6.94655	1.15823
KEGG_PATHWAY	mmu04062:Chemokine signaling pathway	15	0.00711295	ENSMUSG00000021025, ENSMUSG00000024789, ENSMUSG00000030265, ENSMUSG00000024290, ENSMUSG00000019699, ENSMUSG00000041417, ENSMUSG00000034801, ENSMUSG00000031659, ENSMUSG00000009621, ENSMUSG00000052783, ENSMUSG00000020580, ENSMUSG00000052889, ENSMUSG00000029684, ENSMUSG00000025199, ENSMUSG00000022607	2.22024	7.90134	1.1023
KEGG_PATHWAY	mmu05214:Glioma	8	0.00884451	ENSMUSG00000030265, ENSMUSG00000052889, ENSMUSG00000019699, ENSMUSG00000041417, ENSMUSG00000025856, ENSMUSG00000023067, ENSMUSG00000000489, ENSMUSG00000034801	3.36737	9.73644	1.0116
KEGG_PATHWAY	mmu04662:B cell receptor signaling pathway	9	0.00896958	ENSMUSG00000009621, ENSMUSG00000021025, ENSMUSG00000021250, ENSMUSG00000030265, ENSMUSG00000052889, ENSMUSG00000019699, ENSMUSG00000041417, ENSMUSG00000025199, ENSMUSG00000034801	3.03063	9.86769	1.00578
KEGG_PATHWAY	mmu04710:Circadian rhythm	4	0.0108085	ENSMUSG00000055866, ENSMUSG00000029238, ENSMUSG00000020038, ENSMUSG00000055116	8.28891	11.7774
KEGG_PATHWAY	mmu04670:Leukocyte transendothelial migration	11	0.0121646	ENSMUSG00000009621, ENSMUSG00000024290, ENSMUSG00000020580, ENSMUSG00000053137, ENSMUSG00000052889, ENSMUSG00000052397, ENSMUSG00000041417, ENSMUSG00000022469, ENSMUSG00000068036, ENSMUSG00000022607, ENSMUSG00000034101	2.49016	13.162
KEGG_PATHWAY	mmu04910:Insulin signaling pathway	12	0.012713	ENSMUSG00000014956, ENSMUSG00000067279, ENSMUSG00000038894, ENSMUSG00000030265, ENSMUSG00000032601, ENSMUSG00000024122, ENSMUSG00000019699, ENSMUSG00000041417, ENSMUSG00000030671, ENSMUSG00000028156, ENSMUSG00000034801, ENSMUSG00000028945	2.34252	13.7162
KEGG_PATHWAY	mmu04150:mTOR signaling pathway	7	0.0139468	ENSMUSG00000031309, ENSMUSG00000036707, ENSMUSG00000024122, ENSMUSG00000019699, ENSMUSG00000041417, ENSMUSG00000028156, ENSMUSG00000028945	3.49209	14.9514
KEGG_PATHWAY	mmu05223:Non-small cell lung cancer	7	0.0139468	ENSMUSG00000030265, ENSMUSG00000018209, ENSMUSG00000052889, ENSMUSG00000024122, ENSMUSG00000019699, ENSMUSG00000041417, ENSMUSG00000034801	3.49209	14.9514
KEGG_PATHWAY	mmu04210:Apoptosis	9	0.0145252	ENSMUSG00000021025, ENSMUSG00000026031, ENSMUSG00000057329, ENSMUSG00000032601, ENSMUSG00000019699, ENSMUSG00000041417, ENSMUSG00000025199, ENSMUSG00000060477, ENSMUSG00000057367	2.78679	15.5249
KEGG_PATHWAY	mmu04960:Aldosterone-regulated sodium reabsorption	6	0.0183709	ENSMUSG00000038894, ENSMUSG00000030265, ENSMUSG00000052889, ENSMUSG00000024122, ENSMUSG00000041417, ENSMUSG00000019970	3.84842	19.2489
KEGG_PATHWAY	mmu04370:VEGF signaling pathway	8	0.0214959	ENSMUSG00000030265, ENSMUSG00000053137, ENSMUSG00000052889, ENSMUSG00000019699, ENSMUSG00000041417, ENSMUSG00000004951, ENSMUSG00000022607, ENSMUSG00000032487	2.83568	22.1638
DOWN
Category	Term	Count	un-adjusted p-value	Genes	Fold Enrichment	FDR [%]	-log10 (FDR/100)
GOTERM_BP_5	GO:0006412~translation	32	2.62477e-08	ENSMUSG00000029610, ENSMUSG00000036860, ENSMUSG00000018858, ENSMUSG00000060143, ENSMUSG00000062997, ENSMUSG00000032604, ENSMUSG00000037563, ENSMUSG00000021266, ENSMUSG00000022889, ENSMUSG00000041841, ENSMUSG00000024902, ENSMUSG00000030611, ENSMUSG00000049751, ENSMUSG00000020514, ENSMUSG00000004788, ENSMUSG00000029066, ENSMUSG00000023939, ENSMUSG00000030083, ENSMUSG00000034892, ENSMUSG00000063316,…	3.16465	4.20315e-05	6.37643
GOTERM_BP_5	GO:0044267~cellular protein metabolic process	101	6.3202e-06	ENSMUSG00000029610, ENSMUSG00000018858, ENSMUSG00000031714, ENSMUSG00000062997, ENSMUSG00000037563, ENSMUSG00000021266, ENSMUSG00000030397, ENSMUSG00000002844, ENSMUSG00000030083, ENSMUSG00000053693, ENSMUSG00000040820, ENSMUSG00000034892, ENSMUSG00000022442, ENSMUSG00000032571, ENSMUSG00000037772, ENSMUSG00000063316, ENSMUSG00000037805, ENSMUSG00000005469, ENSMUSG00000061118, ENSMUSG00000022193,…	1.52601	0.0101203	3.99481
GOTERM_BP_5	GO:0015031~protein transport	36	0.00147591	ENSMUSG00000029198, ENSMUSG00000027679, ENSMUSG00000039016, ENSMUSG00000024875, ENSMUSG00000003033, ENSMUSG00000025142, ENSMUSG00000021248, ENSMUSG00000019173, ENSMUSG00000004849, ENSMUSG00000021357, ENSMUSG00000024797, ENSMUSG00000020961, ENSMUSG00000061455, ENSMUSG00000015291, ENSMUSG00000059552, ENSMUSG00000009090, ENSMUSG00000034187, ENSMUSG00000037890, ENSMUSG00000053291, ENSMUSG00000020219,…	1.74457	2.33743	1.63126
GOTERM_BP_5	GO:0006839~mitochondrial transport	7	0.00192299	ENSMUSG00000027010, ENSMUSG00000029198, ENSMUSG00000039016, ENSMUSG00000020219, ENSMUSG00000025792, ENSMUSG00000064068, ENSMUSG00000059552	5.25793	3.03531	1.5178
GOTERM_BP_5	GO:0045333~cellular respiration	8	0.00247603	ENSMUSG00000027010, ENSMUSG00000020321, ENSMUSG00000019179, ENSMUSG00000020163, ENSMUSG00000059534, ENSMUSG00000032279, ENSMUSG00000025651, ENSMUSG00000027187	4.27763	3.89213	1.40981
GOTERM_BP_5	GO:0016125~sterol metabolic process	9	0.00291249	ENSMUSG00000020538, ENSMUSG00000022463, ENSMUSG00000031835, ENSMUSG00000032193, ENSMUSG00000018042, ENSMUSG00000027187, ENSMUSG00000002985, ENSMUSG00000026944, ENSMUSG00000050697	3.68738	4.5633	1.34072
GOTERM_BP_5	GO:0006886~intracellular protein transport	19	0.00300861	ENSMUSG00000029198, ENSMUSG00000037890, ENSMUSG00000039016, ENSMUSG00000020219, ENSMUSG00000003033, ENSMUSG00000021248, ENSMUSG00000025142, ENSMUSG00000064068, ENSMUSG00000028049, ENSMUSG00000004849, ENSMUSG00000034353, ENSMUSG00000033365, ENSMUSG00000020961, ENSMUSG00000061455, ENSMUSG00000010392, ENSMUSG00000059552, ENSMUSG00000009090, ENSMUSG00000008036, ENSMUSG00000076432	2.17175	4.71052	1.32693
GOTERM_BP_5	GO:0019752~carboxylic acid metabolic process	27	0.00513566	ENSMUSG00000028670, ENSMUSG00000023456, ENSMUSG00000038633, ENSMUSG00000025203, ENSMUSG00000027984, ENSMUSG00000020150, ENSMUSG00000025903, ENSMUSG00000032604, ENSMUSG00000025068, ENSMUSG00000050697, ENSMUSG00000021266, ENSMUSG00000060376, ENSMUSG00000063415, ENSMUSG00000021238, ENSMUSG00000021786, ENSMUSG00000032281, ENSMUSG00000024978, ENSMUSG00000028937, ENSMUSG00000020321, ENSMUSG00000007783,…	1.77825	7.91439	1.10158
GOTERM_BP_5	GO:0006631~fatty acid metabolic process	14	0.0056772	ENSMUSG00000032281, ENSMUSG00000024665, ENSMUSG00000028670, ENSMUSG00000023456, ENSMUSG00000038633, ENSMUSG00000024978, ENSMUSG00000028937, ENSMUSG00000025203, ENSMUSG00000007783, ENSMUSG00000025903, ENSMUSG00000027984, ENSMUSG00000025153, ENSMUSG00000021786, ENSMUSG00000050697	2.40036	8.71379	1.05979
GOTERM_BP_5	GO:0016310~phosphorylation	36	0.00708965	ENSMUSG00000027207, ENSMUSG00000038967, ENSMUSG00000055523, ENSMUSG00000031714, ENSMUSG00000024617, ENSMUSG00000050697, ENSMUSG00000001729, ENSMUSG00000030397, ENSMUSG00000022956, ENSMUSG00000035390, ENSMUSG00000006273, ENSMUSG00000004054, ENSMUSG00000021180, ENSMUSG00000059534, ENSMUSG00000053693, ENSMUSG00000014554, ENSMUSG00000025651, ENSMUSG00000003534, ENSMUSG00000033191, ENSMUSG00000024151,…	1.58177	10.7683
GOTERM_BP_5	GO:0045940~positive regulation of steroid metabolic process	3	0.00935848	ENSMUSG00000020538, ENSMUSG00000032131, ENSMUSG00000002985	18.9285	13.978
GOTERM_BP_5	GO:0006122~mitochondrial electron transport, ubiquinol to cytochrome c	3	0.0137456	ENSMUSG00000020163, ENSMUSG00000059534, ENSMUSG00000025651	15.7738	19.8797
GOTERM_CC_5	GO:0044444~cytoplasmic part	264	8.51844e-24	ENSMUSG00000033061, ENSMUSG00000038690, ENSMUSG00000025203, ENSMUSG00000049422, ENSMUSG00000025792, ENSMUSG00000037563, ENSMUSG00000029580, ENSMUSG00000030397, ENSMUSG00000038417, ENSMUSG00000022500, ENSMUSG00000022956, ENSMUSG00000031787, ENSMUSG00000040820, ENSMUSG00000059734, ENSMUSG00000053291, ENSMUSG00000020308, ENSMUSG00000031516, ENSMUSG00000037805, ENSMUSG00000049624, ENSMUSG00000051022,…	1.69318	1.13481e-20	21.9451
GOTERM_CC_5	GO:0005739~mitochondrion	120	1.09253e-20	ENSMUSG00000022450, ENSMUSG00000022452, ENSMUSG00000018858, ENSMUSG00000017188, ENSMUSG00000038690, ENSMUSG00000029432, ENSMUSG00000049422, ENSMUSG00000025792, ENSMUSG00000018042, ENSMUSG00000022956, ENSMUSG00000014776, ENSMUSG00000074754, ENSMUSG00000059534, ENSMUSG00000040820, ENSMUSG00000023020, ENSMUSG00000059734, ENSMUSG00000024959, ENSMUSG00000053291, ENSMUSG00000029918, ENSMUSG00000031516,…	2.43579	1.45545e-17	18.837
GOTERM_CC_5	GO:0005737~cytoplasm	345	1.50484e-20	ENSMUSG00000033061, ENSMUSG00000038690, ENSMUSG00000025203, ENSMUSG00000049422, ENSMUSG00000025792, ENSMUSG00000037563, ENSMUSG00000046949, ENSMUSG00000021266, ENSMUSG00000030397, ENSMUSG00000029580, ENSMUSG00000038417, ENSMUSG00000022956, ENSMUSG00000022500, ENSMUSG00000053693, ENSMUSG00000031787, ENSMUSG00000034187, ENSMUSG00000040820, ENSMUSG00000059734, ENSMUSG00000053291, ENSMUSG00000020308,…	1.43133	2.00473e-17	18.6979
GOTERM_CC_5	GO:0044429~mitochondrial part	53	9.42133e-11	ENSMUSG00000036860, ENSMUSG00000005510, ENSMUSG00000027010, ENSMUSG00000022450, ENSMUSG00000038690, ENSMUSG00000038967, ENSMUSG00000025792, ENSMUSG00000018042, ENSMUSG00000030785, ENSMUSG00000022889, ENSMUSG00000022956, ENSMUSG00000060376, ENSMUSG00000032480, ENSMUSG00000029066, ENSMUSG00000059534, ENSMUSG00000025651, ENSMUSG00000024959, ENSMUSG00000020219, ENSMUSG00000033720, ENSMUSG00000037772,…	2.71415	1.2551e-07	8.90132
GOTERM_CC_5	GO:0005840~ribosome	28	2.57388e-09	ENSMUSG00000036860, ENSMUSG00000060143, ENSMUSG00000062997, ENSMUSG00000037563, ENSMUSG00000022889, ENSMUSG00000041841, ENSMUSG00000024902, ENSMUSG00000030611, ENSMUSG00000049751, ENSMUSG00000020514, ENSMUSG00000028622, ENSMUSG00000029066, ENSMUSG00000023939, ENSMUSG00000034892, ENSMUSG00000029918, ENSMUSG00000063316, ENSMUSG00000037772, ENSMUSG00000003429, ENSMUSG00000062981, ENSMUSG00000037805,…	3.91333	3.42888e-06	7.46485
GOTERM_CC_5	GO:0043229~intracellular organelle	369	4.85074e-09	ENSMUSG00000033061, ENSMUSG00000038690, ENSMUSG00000025203, ENSMUSG00000049422, ENSMUSG00000069274, ENSMUSG00000025792, ENSMUSG00000056895, ENSMUSG00000037563, ENSMUSG00000030397, ENSMUSG00000029580, ENSMUSG00000038417, ENSMUSG00000018102, ENSMUSG00000022956, ENSMUSG00000022500, ENSMUSG00000053693, ENSMUSG00000031787, ENSMUSG00000040820, ENSMUSG00000059734, ENSMUSG00000053291, ENSMUSG00000020308,…	1.20961	6.46208e-06	7.18963
GOTERM_CC_5	GO:0043231~intracellular membrane-bounded organelle	331	5.48787e-08	ENSMUSG00000033061, ENSMUSG00000038690, ENSMUSG00000025203, ENSMUSG00000049422, ENSMUSG00000069274, ENSMUSG00000025792, ENSMUSG00000056895, ENSMUSG00000038417, ENSMUSG00000018102, ENSMUSG00000022956, ENSMUSG00000022500, ENSMUSG00000040820, ENSMUSG00000059734, ENSMUSG00000053291, ENSMUSG00000020308, ENSMUSG00000020116, ENSMUSG00000031516, ENSMUSG00000037805, ENSMUSG00000049624, ENSMUSG00000051022,…	1.22428	7.31086e-05	6.13603
GOTERM_CC_5	GO:0005743~mitochondrial inner membrane	31	6.46542e-07	ENSMUSG00000027010, ENSMUSG00000005510, ENSMUSG00000022450, ENSMUSG00000027679, ENSMUSG00000039016, ENSMUSG00000029632, ENSMUSG00000038690, ENSMUSG00000010025, ENSMUSG00000025792, ENSMUSG00000027984, ENSMUSG00000018042, ENSMUSG00000030785, ENSMUSG00000022956, ENSMUSG00000059534, ENSMUSG00000025651, ENSMUSG00000070283, ENSMUSG00000024038, ENSMUSG00000024978, ENSMUSG00000020219, ENSMUSG00000071711,…	2.81035	0.000861309	5.06484
GOTERM_CC_5	GO:0005759~mitochondrial matrix	22	6.84704e-07	ENSMUSG00000029198, ENSMUSG00000036860, ENSMUSG00000038967, ENSMUSG00000037772, ENSMUSG00000039640, ENSMUSG00000027984, ENSMUSG00000030802, ENSMUSG00000031672, ENSMUSG00000032527, ENSMUSG00000022889, ENSMUSG00000035561, ENSMUSG00000021646, ENSMUSG00000024902, ENSMUSG00000060376, ENSMUSG00000019179, ENSMUSG00000032480, ENSMUSG00000028622, ENSMUSG00000024683, ENSMUSG00000030879, ENSMUSG00000029066,…	3.6218	0.000912148	5.03993
GOTERM_CC_5	GO:0031980~mitochondrial lumen	22	6.84704e-07	ENSMUSG00000029198, ENSMUSG00000036860, ENSMUSG00000038967, ENSMUSG00000037772, ENSMUSG00000039640, ENSMUSG00000027984, ENSMUSG00000030802, ENSMUSG00000031672, ENSMUSG00000032527, ENSMUSG00000022889, ENSMUSG00000035561, ENSMUSG00000021646, ENSMUSG00000024902, ENSMUSG00000060376, ENSMUSG00000019179, ENSMUSG00000032480, ENSMUSG00000028622, ENSMUSG00000024683, ENSMUSG00000030879, ENSMUSG00000029066,…	3.6218	0.000912148	5.03993
GOTERM_CC_5	GO:0005740~mitochondrial envelope	36	1.45787e-06	ENSMUSG00000022450, ENSMUSG00000005510, ENSMUSG00000027010, ENSMUSG00000027679, ENSMUSG00000039016, ENSMUSG00000029632, ENSMUSG00000038690, ENSMUSG00000010025, ENSMUSG00000027984, ENSMUSG00000025792, ENSMUSG00000018042, ENSMUSG00000030785, ENSMUSG00000022956, ENSMUSG00000059534, ENSMUSG00000025651, ENSMUSG00000070283, ENSMUSG00000024038, ENSMUSG00000028991, ENSMUSG00000024959, ENSMUSG00000024978,…	2.47067	0.00194214	4.71172
GOTERM_CC_5	GO:0019866~organelle inner membrane	31	1.94881e-06	ENSMUSG00000027010, ENSMUSG00000005510, ENSMUSG00000022450, ENSMUSG00000027679, ENSMUSG00000039016, ENSMUSG00000029632, ENSMUSG00000038690, ENSMUSG00000010025, ENSMUSG00000025792, ENSMUSG00000027984, ENSMUSG00000018042, ENSMUSG00000030785, ENSMUSG00000022956, ENSMUSG00000059534, ENSMUSG00000025651, ENSMUSG00000070283, ENSMUSG00000024038, ENSMUSG00000024978, ENSMUSG00000020219, ENSMUSG00000071711,…	2.66623	0.00259614	4.58567
GOTERM_CC_5	GO:0031966~mitochondrial membrane	34	2.81038e-06	ENSMUSG00000022450, ENSMUSG00000005510, ENSMUSG00000027010, ENSMUSG00000027679, ENSMUSG00000039016, ENSMUSG00000029632, ENSMUSG00000038690, ENSMUSG00000010025, ENSMUSG00000027984, ENSMUSG00000025792, ENSMUSG00000018042, ENSMUSG00000030785, ENSMUSG00000022956, ENSMUSG00000059534, ENSMUSG00000025651, ENSMUSG00000070283, ENSMUSG00000024038, ENSMUSG00000028991, ENSMUSG00000024959, ENSMUSG00000024978,…	2.47925	0.00374389	4.42668
GOTERM_CC_5	GO:0030529~ribonucleoprotein complex	36	5.4378e-05	ENSMUSG00000036860, ENSMUSG00000060143, ENSMUSG00000062997, ENSMUSG00000037563, ENSMUSG00000022889, ENSMUSG00000041841, ENSMUSG00000024902, ENSMUSG00000030611, ENSMUSG00000049751, ENSMUSG00000020514, ENSMUSG00000028622, ENSMUSG00000029066, ENSMUSG00000023939, ENSMUSG00000061479, ENSMUSG00000020180, ENSMUSG00000034892, ENSMUSG00000029918, ENSMUSG00000063316, ENSMUSG00000037772, ENSMUSG00000003429,…	2.09098	0.0724172	3.14016
GOTERM_CC_5	GO:0015934~large ribosomal subunit	9	7.71638e-05	ENSMUSG00000036860, ENSMUSG00000022889, ENSMUSG00000024902, ENSMUSG00000020514, ENSMUSG00000037772, ENSMUSG00000057841, ENSMUSG00000024683, ENSMUSG00000030879, ENSMUSG00000029066	6.19252	0.102748	2.98823
GOTERM_CC_5	GO:0000313~organellar ribosome	9	0.00011225	ENSMUSG00000036860, ENSMUSG00000022889, ENSMUSG00000024902, ENSMUSG00000037772, ENSMUSG00000024683, ENSMUSG00000028622, ENSMUSG00000039640, ENSMUSG00000030879, ENSMUSG00000029066	5.89045	0.149435	2.82555
GOTERM_CC_5	GO:0005761~mitochondrial ribosome	9	0.00011225	ENSMUSG00000036860, ENSMUSG00000022889, ENSMUSG00000024902, ENSMUSG00000037772, ENSMUSG00000024683, ENSMUSG00000028622, ENSMUSG00000039640, ENSMUSG00000030879, ENSMUSG00000029066	5.89045	0.149435	2.82555
GOTERM_CC_5	GO:0070469~respiratory chain	11	0.000132171	ENSMUSG00000059734, ENSMUSG00000022450, ENSMUSG00000030785, ENSMUSG00000005510, ENSMUSG00000029632, ENSMUSG00000022551, ENSMUSG00000020163, ENSMUSG00000059534, ENSMUSG00000025651, ENSMUSG00000040048, ENSMUSG00000024038	4.54118	0.175932	2.75465
GOTERM_CC_5	GO:0033279~ribosomal subunit	11	0.000150677	ENSMUSG00000036860, ENSMUSG00000022889, ENSMUSG00000034892, ENSMUSG00000024902, ENSMUSG00000020514, ENSMUSG00000037772, ENSMUSG00000057841, ENSMUSG00000024683, ENSMUSG00000030879, ENSMUSG00000029066, ENSMUSG00000037563	4.47238	0.200543	2.69779
GOTERM_CC_5	GO:0000315~organellar large ribosomal subunit	7	0.000151296	ENSMUSG00000036860, ENSMUSG00000022889, ENSMUSG00000024902, ENSMUSG00000037772, ENSMUSG00000024683, ENSMUSG00000030879, ENSMUSG00000029066	8.16695	0.201366	2.69601
GOTERM_CC_5	GO:0005762~mitochondrial large ribosomal subunit	7	0.000151296	ENSMUSG00000036860, ENSMUSG00000022889, ENSMUSG00000024902, ENSMUSG00000037772, ENSMUSG00000024683, ENSMUSG00000030879, ENSMUSG00000029066	8.16695	0.201366	2.69601
GOTERM_CC_5	GO:0031967~organelle envelope	38	0.000260469	ENSMUSG00000022450, ENSMUSG00000005510, ENSMUSG00000027010, ENSMUSG00000027679, ENSMUSG00000039016, ENSMUSG00000029632, ENSMUSG00000038319, ENSMUSG00000038690, ENSMUSG00000010025, ENSMUSG00000027984, ENSMUSG00000025792, ENSMUSG00000018042, ENSMUSG00000030785, ENSMUSG00000022956, ENSMUSG00000059534, ENSMUSG00000025651, ENSMUSG00000070283, ENSMUSG00000024038, ENSMUSG00000028991, ENSMUSG00000024959,…	1.88834	0.346437	2.46038
GOTERM_CC_5	GO:0044446~intracellular organelle part	152	0.000508565	ENSMUSG00000022450, ENSMUSG00000021720, ENSMUSG00000038690, ENSMUSG00000069274, ENSMUSG00000025792, ENSMUSG00000018042, ENSMUSG00000049775, ENSMUSG00000056895, ENSMUSG00000026944, ENSMUSG00000039637, ENSMUSG00000037563, ENSMUSG00000030397, ENSMUSG00000019261, ENSMUSG00000038417, ENSMUSG00000014776, ENSMUSG00000022956, ENSMUSG00000018102, ENSMUSG00000029712, ENSMUSG00000061455, ENSMUSG00000059534,…	1.27702	0.675384	2.17045
GOTERM_CC_5	GO:0009898~internal side of plasma membrane	23	0.00111185	ENSMUSG00000028991, ENSMUSG00000068270, ENSMUSG00000053291, ENSMUSG00000003033, ENSMUSG00000030890, ENSMUSG00000010025, ENSMUSG00000025142, ENSMUSG00000018042, ENSMUSG00000019173, ENSMUSG00000004849, ENSMUSG00000077450, ENSMUSG00000031104, ENSMUSG00000025026, ENSMUSG00000022500, ENSMUSG00000048240, ENSMUSG00000022438, ENSMUSG00000071658, ENSMUSG00000053693, ENSMUSG00000057914, ENSMUSG00000059810,…	2.15048	1.47108	1.83236
GOTERM_CC_5	GO:0000323~lytic vacuole	15	0.00706031	ENSMUSG00000081534, ENSMUSG00000022453, ENSMUSG00000045594, ENSMUSG00000034707, ENSMUSG00000032359, ENSMUSG00000049624, ENSMUSG00000026944, ENSMUSG00000029998, ENSMUSG00000025579, ENSMUSG00000026411, ENSMUSG00000004207, ENSMUSG00000022500, ENSMUSG00000029598, ENSMUSG00000017760, ENSMUSG00000032127	2.24868	9.00721	1.04541
GOTERM_CC_5	GO:0005829~cytosol	33	0.00797966	ENSMUSG00000029610, ENSMUSG00000018293, ENSMUSG00000025142, ENSMUSG00000018042, ENSMUSG00000049775, ENSMUSG00000039637, ENSMUSG00000024387, ENSMUSG00000001729, ENSMUSG00000029580, ENSMUSG00000019261, ENSMUSG00000024346, ENSMUSG00000006273, ENSMUSG00000014554, ENSMUSG00000059552, ENSMUSG00000021846, ENSMUSG00000017221, ENSMUSG00000024959, ENSMUSG00000028937, ENSMUSG00000034892, ENSMUSG00000020321,…	1.61299	10.1232
GOTERM_CC_5	GO:0005773~vacuole	16	0.00936373	ENSMUSG00000081534, ENSMUSG00000022453, ENSMUSG00000045594, ENSMUSG00000034707, ENSMUSG00000032359, ENSMUSG00000049624, ENSMUSG00000026944, ENSMUSG00000029998, ENSMUSG00000025579, ENSMUSG00000004207, ENSMUSG00000026411, ENSMUSG00000022500, ENSMUSG00000029598, ENSMUSG00000017760, ENSMUSG00000032127, ENSMUSG00000010936	2.10465	11.7794
GOTERM_CC_5	GO:0030119~AP-type membrane coat adaptor complex	5	0.0128633	ENSMUSG00000003033, ENSMUSG00000020961, ENSMUSG00000008036, ENSMUSG00000009090, ENSMUSG00000004849	5.36685	15.842
GOTERM_CC_5	GO:0030131~clathrin adaptor complex	5	0.0128633	ENSMUSG00000003033, ENSMUSG00000020961, ENSMUSG00000008036, ENSMUSG00000009090, ENSMUSG00000004849	5.36685	15.842
GOTERM_MF_5	GO:0005416~cation:amino acid symporter activity	5	0.000158435	ENSMUSG00000030310, ENSMUSG00000030307, ENSMUSG00000028542, ENSMUSG00000037771, ENSMUSG00000030108	16.2254	0.197745	2.70389
GOTERM_MF_5	GO:0015171~amino acid transmembrane transporter activity	8	0.000774798	ENSMUSG00000027010, ENSMUSG00000030310, ENSMUSG00000030307, ENSMUSG00000028542, ENSMUSG00000037771, ENSMUSG00000010064, ENSMUSG00000030108, ENSMUSG00000031596	5.19213	0.963618	2.0161
GOTERM_MF_5	GO:0046943~carboxylic acid transmembrane transporter activity	9	0.00143366	ENSMUSG00000027010, ENSMUSG00000030310, ENSMUSG00000030307, ENSMUSG00000028542, ENSMUSG00000037771, ENSMUSG00000010064, ENSMUSG00000049624, ENSMUSG00000030108, ENSMUSG00000031596	4.11348	1.77632	1.75048
GOTERM_MF_5	GO:0004672~protein kinase activity	31	0.00376148	ENSMUSG00000024382, ENSMUSG00000019738, ENSMUSG00000038319, ENSMUSG00000038967, ENSMUSG00000055523, ENSMUSG00000066129, ENSMUSG00000024617, ENSMUSG00000050697, ENSMUSG00000001729, ENSMUSG00000030397, ENSMUSG00000035390, ENSMUSG00000004054, ENSMUSG00000021180, ENSMUSG00000053693, ENSMUSG00000003534, ENSMUSG00000033191, ENSMUSG00000063065, ENSMUSG00000004667, ENSMUSG00000028991, ENSMUSG00000032571,…	1.72551	4.59878	1.33736
GOTERM_MF_5	GO:0032559~adenyl ribonucleotide binding	61	0.0100364	ENSMUSG00000038965, ENSMUSG00000020935, ENSMUSG00000038967, ENSMUSG00000027207, ENSMUSG00000055523, ENSMUSG00000026944, ENSMUSG00000032604, ENSMUSG00000040177, ENSMUSG00000050697, ENSMUSG00000021266, ENSMUSG00000029580, ENSMUSG00000030397, ENSMUSG00000032480, ENSMUSG00000029712, ENSMUSG00000030317, ENSMUSG00000053693, ENSMUSG00000003534, ENSMUSG00000024151, ENSMUSG00000040820, ENSMUSG00000034187,…	1.35582	11.8397
PANTHER_BP_ALL	BP00077:Oxidative phosphorylation	11	4.77552e-05	ENSMUSG00000059734, ENSMUSG00000022450, ENSMUSG00000030785, ENSMUSG00000005510, ENSMUSG00000038690, ENSMUSG00000022551, ENSMUSG00000020163, ENSMUSG00000059534, ENSMUSG00000040048, ENSMUSG00000017778, ENSMUSG00000026489	5.15598	0.059337	3.22667
PANTHER_BP_ALL	BP00125:Intracellular protein traffic	47	0.000197502	ENSMUSG00000039018, ENSMUSG00000062825, ENSMUSG00000003033, ENSMUSG00000042348, ENSMUSG00000029432, ENSMUSG00000003380, ENSMUSG00000021248, ENSMUSG00000024944, ENSMUSG00000045007, ENSMUSG00000019173, ENSMUSG00000002043, ENSMUSG00000039637, ENSMUSG00000030731, ENSMUSG00000029580, ENSMUSG00000021357, ENSMUSG00000017760, ENSMUSG00000029712, ENSMUSG00000020961, ENSMUSG00000061455, ENSMUSG00000015291,…	1.76241	0.245191	2.6105
PANTHER_BP_ALL	BP00076:Electron transport	21	0.000322732	ENSMUSG00000059734, ENSMUSG00000021481, ENSMUSG00000043190, ENSMUSG00000022450, ENSMUSG00000005510, ENSMUSG00000038690, ENSMUSG00000020163, ENSMUSG00000000959, ENSMUSG00000018042, ENSMUSG00000005354, ENSMUSG00000027187, ENSMUSG00000040048, ENSMUSG00000030785, ENSMUSG00000022551, ENSMUSG00000063415, ENSMUSG00000059534, ENSMUSG00000025651, ENSMUSG00000050043, ENSMUSG00000017778, ENSMUSG00000033684,…	2.48671	0.400373	2.39753
PANTHER_BP_ALL	BP00060:Protein metabolism and modification	116	0.00045489	ENSMUSG00000029610, ENSMUSG00000022453, ENSMUSG00000018858, ENSMUSG00000020473, ENSMUSG00000008090, ENSMUSG00000062997, ENSMUSG00000037563, ENSMUSG00000021266, ENSMUSG00000030397, ENSMUSG00000030317, ENSMUSG00000053693, ENSMUSG00000040820, ENSMUSG00000023224, ENSMUSG00000029918, ENSMUSG00000022442, ENSMUSG00000032571, ENSMUSG00000063316, ENSMUSG00000037805, ENSMUSG00000024457, ENSMUSG00000051022,…	1.33748	0.563899	2.2488
PANTHER_BP_ALL	BP00013:Amino acid metabolism	16	0.00222167	ENSMUSG00000028542, ENSMUSG00000007783, ENSMUSG00000002981, ENSMUSG00000025153, ENSMUSG00000030802, ENSMUSG00000030630, ENSMUSG00000031672, ENSMUSG00000025190, ENSMUSG00000031596, ENSMUSG00000021646, ENSMUSG00000060376, ENSMUSG00000030407, ENSMUSG00000031149, ENSMUSG00000057880, ENSMUSG00000021238, ENSMUSG00000024899	2.46562	2.72645	1.5644
PANTHER_BP_ALL	BP00180:Detoxification	9	0.00310722	ENSMUSG00000058135, ENSMUSG00000063856, ENSMUSG00000052456, ENSMUSG00000071711, ENSMUSG00000027890, ENSMUSG00000026179, ENSMUSG00000004032, ENSMUSG00000061046, ENSMUSG00000025068	3.65945	3.79402	1.4209
PANTHER_BP_ALL	BP00061:Protein biosynthesis	27	0.00565891	ENSMUSG00000029610, ENSMUSG00000018858, ENSMUSG00000020741, ENSMUSG00000037563, ENSMUSG00000024902, ENSMUSG00000041841, ENSMUSG00000030611, ENSMUSG00000049751, ENSMUSG00000020514, ENSMUSG00000004788, ENSMUSG00000028622, ENSMUSG00000029066, ENSMUSG00000023939, ENSMUSG00000029918, ENSMUSG00000063316, ENSMUSG00000003429, ENSMUSG00000062981, ENSMUSG00000037805, ENSMUSG00000039640, ENSMUSG00000045625,…	1.76932	6.81023	1.16684
PANTHER_BP_ALL	BP00141:Transport	54	0.00820859	ENSMUSG00000035504, ENSMUSG00000027010, ENSMUSG00000030310, ENSMUSG00000057193, ENSMUSG00000003033, ENSMUSG00000038690, ENSMUSG00000042348, ENSMUSG00000025792, ENSMUSG00000026944, ENSMUSG00000039637, ENSMUSG00000029580, ENSMUSG00000021357, ENSMUSG00000059336, ENSMUSG00000022956, ENSMUSG00000029712, ENSMUSG00000015291, ENSMUSG00000034187, ENSMUSG00000040584, ENSMUSG00000024194, ENSMUSG00000052456,…	1.41711	9.73701	1.01157
PANTHER_BP_ALL	BP00129:Endocytosis	16	0.00898541	ENSMUSG00000062825, ENSMUSG00000053291, ENSMUSG00000003033, ENSMUSG00000028049, ENSMUSG00000019173, ENSMUSG00000039637, ENSMUSG00000029580, ENSMUSG00000077450, ENSMUSG00000019478, ENSMUSG00000031104, ENSMUSG00000029712, ENSMUSG00000020695, ENSMUSG00000008036, ENSMUSG00000016637, ENSMUSG00000024835, ENSMUSG00000032127	2.11754	10.6118
PANTHER_BP_ALL	BP00126:Exocytosis	11	0.0131066	ENSMUSG00000029580, ENSMUSG00000062825, ENSMUSG00000021357, ENSMUSG00000033949, ENSMUSG00000029712, ENSMUSG00000028049, ENSMUSG00000024944, ENSMUSG00000028184, ENSMUSG00000016637, ENSMUSG00000034187, ENSMUSG00000030731	2.49148	15.1236
PANTHER_MF_ALL	MF00123:Oxidoreductase	37	0.000193253	ENSMUSG00000043190, ENSMUSG00000022450, ENSMUSG00000005510, ENSMUSG00000038633, ENSMUSG00000029632, ENSMUSG00000025203, ENSMUSG00000010025, ENSMUSG00000027984, ENSMUSG00000018042, ENSMUSG00000005354, ENSMUSG00000032279, ENSMUSG00000029311, ENSMUSG00000030785, ENSMUSG00000051483, ENSMUSG00000060376, ENSMUSG00000063415, ENSMUSG00000059534, ENSMUSG00000025651, ENSMUSG00000021238, ENSMUSG00000049090,…	1.93701	0.237558	2.62423
PANTHER_MF_ALL	MF00126:Dehydrogenase	16	0.0020801	ENSMUSG00000059734, ENSMUSG00000005510, ENSMUSG00000022450, ENSMUSG00000020321, ENSMUSG00000010025, ENSMUSG00000027984, ENSMUSG00000025153, ENSMUSG00000032279, ENSMUSG00000029311, ENSMUSG00000035561, ENSMUSG00000051483, ENSMUSG00000060376, ENSMUSG00000019179, ENSMUSG00000021238, ENSMUSG00000049090, ENSMUSG00000046598	2.482	2.52989	1.5969
PANTHER_MF_ALL	MF00127:Reductase	13	0.00357817	ENSMUSG00000059734, ENSMUSG00000005510, ENSMUSG00000051483, ENSMUSG00000023094, ENSMUSG00000022551, ENSMUSG00000020163, ENSMUSG00000059534, ENSMUSG00000018042, ENSMUSG00000025651, ENSMUSG00000049090, ENSMUSG00000046598, ENSMUSG00000000253, ENSMUSG00000029311	2.66834	4.31533	1.36499
PANTHER_MF_ALL	MF00075:Ribosomal protein	21	0.0102437	ENSMUSG00000029918, ENSMUSG00000063316, ENSMUSG00000003429, ENSMUSG00000062981, ENSMUSG00000037805, ENSMUSG00000039640, ENSMUSG00000046364, ENSMUSG00000037563, ENSMUSG00000041841, ENSMUSG00000067288, ENSMUSG00000024902, ENSMUSG00000020514, ENSMUSG00000030611, ENSMUSG00000049751, ENSMUSG00000057841, ENSMUSG00000028622, ENSMUSG00000024683, ENSMUSG00000030879, ENSMUSG00000057863, ENSMUSG00000029066,…	1.85053	11.901
PANTHER_MF_ALL	MF00082:Transporter	31	0.0115423	ENSMUSG00000035504, ENSMUSG00000030310, ENSMUSG00000039016, ENSMUSG00000057193, ENSMUSG00000038690, ENSMUSG00000025792, ENSMUSG00000002985, ENSMUSG00000026944, ENSMUSG00000019894, ENSMUSG00000059336, ENSMUSG00000022956, ENSMUSG00000006273, ENSMUSG00000040584, ENSMUSG00000024194, ENSMUSG00000052456, ENSMUSG00000028542, ENSMUSG00000033720, ENSMUSG00000049624, ENSMUSG00000037089, ENSMUSG00000000959,…	1.6005	13.313
PANTHER_MF_ALL	MF00141:Hydrolase	32	0.01875	ENSMUSG00000024382, ENSMUSG00000028670, ENSMUSG00000022453, ENSMUSG00000042348, ENSMUSG00000034707, ENSMUSG00000025903, ENSMUSG00000045211, ENSMUSG00000025579, ENSMUSG00000022956, ENSMUSG00000006273, ENSMUSG00000024800, ENSMUSG00000002844, ENSMUSG00000005686, ENSMUSG00000034321, ENSMUSG00000026179, ENSMUSG00000029119, ENSMUSG00000021287, ENSMUSG00000034187, ENSMUSG00000034748, ENSMUSG00000024767,…	1.52576	20.779
Combined
Category	Term	Count	un-adjusted p-value	Genes	Fold Enrichment	FDR [%]	-log10 (FDR/100)
GOTERM_BP_5	GO:0044267~cellular protein metabolic process	262	3.26905e-14	ENSMUSG00000024360, ENSMUSG00000025616, ENSMUSG00000026739, ENSMUSG00000036432, ENSMUSG00000037563, ENSMUSG00000024639, ENSMUSG00000021266, ENSMUSG00000032905, ENSMUSG00000019977, ENSMUSG00000030397, ENSMUSG00000031644, ENSMUSG00000053693, ENSMUSG00000049225, ENSMUSG00000019970, ENSMUSG00000040820, ENSMUSG00000028309, ENSMUSG00000024789, ENSMUSG00000035293, ENSMUSG00000037805, ENSMUSG00000022772,…	1.53527	5.46563e-11	12.2624
GOTERM_BP_5	GO:0019219~regulation of nucleobase, nucleoside, nucleotide and nucleic acid metabolic process	271	2.32893e-10	ENSMUSG00000025616, ENSMUSG00000050855, ENSMUSG00000026739, ENSMUSG00000018501, ENSMUSG00000024639, ENSMUSG00000026058, ENSMUSG00000022500, ENSMUSG00000048240, ENSMUSG00000042197, ENSMUSG00000029684, ENSMUSG00000059475, ENSMUSG00000072258, ENSMUSG00000013089, ENSMUSG00000033623, ENSMUSG00000031659, ENSMUSG00000059325, ENSMUSG00000057093, ENSMUSG00000051451, ENSMUSG00000022255, ENSMUSG00000001520,…	1.40916	3.8998e-07	8.40896
GOTERM_BP_5	GO:0045449~regulation of transcription	258	4.30242e-10	ENSMUSG00000025616, ENSMUSG00000050855, ENSMUSG00000026739, ENSMUSG00000018501, ENSMUSG00000026058, ENSMUSG00000022500, ENSMUSG00000042197, ENSMUSG00000029684, ENSMUSG00000059475, ENSMUSG00000072258, ENSMUSG00000013089, ENSMUSG00000033623, ENSMUSG00000059325, ENSMUSG00000057093, ENSMUSG00000051451, ENSMUSG00000022255, ENSMUSG00000001520, ENSMUSG00000006599, ENSMUSG00000024382, ENSMUSG00000019897,…	1.41747	7.20443e-07	8.1424
GOTERM_BP_5	GO:0010468~regulation of gene expression	276	6.24588e-10	ENSMUSG00000025616, ENSMUSG00000050855, ENSMUSG00000026739, ENSMUSG00000018501, ENSMUSG00000026058, ENSMUSG00000022500, ENSMUSG00000016481, ENSMUSG00000042197, ENSMUSG00000029684, ENSMUSG00000059475, ENSMUSG00000072258, ENSMUSG00000023224, ENSMUSG00000013089, ENSMUSG00000033623, ENSMUSG00000059325, ENSMUSG00000026740, ENSMUSG00000057093, ENSMUSG00000051451, ENSMUSG00000022255, ENSMUSG00000001520,…	1.39026	1.04588e-06	7.98052
GOTERM_BP_5	GO:0010556~regulation of macromolecule biosynthetic process	270	1.33301e-09	ENSMUSG00000025616, ENSMUSG00000050855, ENSMUSG00000026739, ENSMUSG00000018501, ENSMUSG00000026058, ENSMUSG00000022500, ENSMUSG00000042197, ENSMUSG00000029684, ENSMUSG00000059475, ENSMUSG00000072258, ENSMUSG00000013089, ENSMUSG00000033623, ENSMUSG00000059325, ENSMUSG00000026740, ENSMUSG00000057093, ENSMUSG00000051451, ENSMUSG00000022255, ENSMUSG00000001520, ENSMUSG00000006599, ENSMUSG00000024382,…	1.38745	2.23213e-06	7.65128
GOTERM_BP_5	GO:0031326~regulation of cellular biosynthetic process	276	3.21627e-09	ENSMUSG00000025616, ENSMUSG00000050855, ENSMUSG00000026739, ENSMUSG00000018501, ENSMUSG00000024639, ENSMUSG00000026058, ENSMUSG00000022500, ENSMUSG00000048240, ENSMUSG00000042197, ENSMUSG00000029684, ENSMUSG00000059475, ENSMUSG00000072258, ENSMUSG00000013089, ENSMUSG00000033623, ENSMUSG00000031659, ENSMUSG00000059325, ENSMUSG00000026740, ENSMUSG00000057093, ENSMUSG00000051451, ENSMUSG00000022255,…	1.36885	5.38567e-06	7.26876
GOTERM_BP_5	GO:0006396~RNA processing	67	6.53322e-07	ENSMUSG00000029817, ENSMUSG00000079470, ENSMUSG00000021413, ENSMUSG00000022023, ENSMUSG00000028676, ENSMUSG00000014776, ENSMUSG00000042109, ENSMUSG00000037262, ENSMUSG00000060475, ENSMUSG00000030888, ENSMUSG00000034724, ENSMUSG00000021039, ENSMUSG00000020180, ENSMUSG00000029169, ENSMUSG00000056962, ENSMUSG00000037805, ENSMUSG00000031590, ENSMUSG00000024095, ENSMUSG00000068882, ENSMUSG00000024097,…	1.87589	0.00109399	4.96099
GOTERM_BP_5	GO:0016070~RNA metabolic process	91	7.86137e-07	ENSMUSG00000029817, ENSMUSG00000079470, ENSMUSG00000019738, ENSMUSG00000021413, ENSMUSG00000041199, ENSMUSG00000031487, ENSMUSG00000022023, ENSMUSG00000022160, ENSMUSG00000028676, ENSMUSG00000028842, ENSMUSG00000032604, ENSMUSG00000021266, ENSMUSG00000042109, ENSMUSG00000022682, ENSMUSG00000014776, ENSMUSG00000037262, ENSMUSG00000060475, ENSMUSG00000072258, ENSMUSG00000030888, ENSMUSG00000034724,…	1.68189	0.00131638	4.88062
GOTERM_BP_5	GO:0016071~mRNA metabolic process	51	1.04074e-06	ENSMUSG00000029817, ENSMUSG00000042772, ENSMUSG00000056216, ENSMUSG00000033565, ENSMUSG00000027905, ENSMUSG00000020863, ENSMUSG00000021413, ENSMUSG00000032621, ENSMUSG00000022023, ENSMUSG00000022160, ENSMUSG00000028676, ENSMUSG00000028842, ENSMUSG00000032423, ENSMUSG00000061136, ENSMUSG00000028180, ENSMUSG00000028820, ENSMUSG00000042109, ENSMUSG00000014776, ENSMUSG00000035597, ENSMUSG00000037262,…	2.06623	0.00174271	4.75878
GOTERM_BP_5	GO:0016568~chromatin modification	43	1.11718e-06	ENSMUSG00000031422, ENSMUSG00000002028, ENSMUSG00000056216, ENSMUSG00000028693, ENSMUSG00000040363, ENSMUSG00000049327, ENSMUSG00000052139, ENSMUSG00000057406, ENSMUSG00000018476, ENSMUSG00000025616, ENSMUSG00000026739, ENSMUSG00000027671, ENSMUSG00000031715, ENSMUSG00000018501, ENSMUSG00000063049, ENSMUSG00000040481, ENSMUSG00000029004, ENSMUSG00000056608, ENSMUSG00000029712, ENSMUSG00000031820,…	2.22931	0.0018707	4.728
GOTERM_BP_5	GO:0015031~protein transport	89	1.36156e-06	ENSMUSG00000078185, ENSMUSG00000028385, ENSMUSG00000003226, ENSMUSG00000024875, ENSMUSG00000003033, ENSMUSG00000020128, ENSMUSG00000029616, ENSMUSG00000025142, ENSMUSG00000003037, ENSMUSG00000019173, ENSMUSG00000046230, ENSMUSG00000021357, ENSMUSG00000074909, ENSMUSG00000030082, ENSMUSG00000061244, ENSMUSG00000061455, ENSMUSG00000015291, ENSMUSG00000020671, ENSMUSG00000009090, ENSMUSG00000044465,…	1.67272	0.00227991	4.64208
GOTERM_BP_5	GO:0006397~mRNA processing	44	7.38941e-06	ENSMUSG00000029817, ENSMUSG00000033565, ENSMUSG00000027905, ENSMUSG00000021413, ENSMUSG00000020863, ENSMUSG00000032621, ENSMUSG00000022023, ENSMUSG00000028676, ENSMUSG00000032423, ENSMUSG00000061136, ENSMUSG00000028180, ENSMUSG00000014776, ENSMUSG00000028820, ENSMUSG00000042109, ENSMUSG00000035597, ENSMUSG00000037262, ENSMUSG00000060475, ENSMUSG00000071172, ENSMUSG00000061479, ENSMUSG00000021431,…	2.05478	0.0123729	3.90753
GOTERM_BP_5	GO:0006464~protein modification process	145	1.18521e-05	ENSMUSG00000032307, ENSMUSG00000024360, ENSMUSG00000025060, ENSMUSG00000053137, ENSMUSG00000025616, ENSMUSG00000026739, ENSMUSG00000031714, ENSMUSG00000030451, ENSMUSG00000036432, ENSMUSG00000024639, ENSMUSG00000030397, ENSMUSG00000037470, ENSMUSG00000031644, ENSMUSG00000028788, ENSMUSG00000002844, ENSMUSG00000025199, ENSMUSG00000053693, ENSMUSG00000049225, ENSMUSG00000040820, ENSMUSG00000019970,…	1.40803	0.0198446	3.70236
GOTERM_BP_5	GO:0006412~translation	49	2.4497e-05	ENSMUSG00000026615, ENSMUSG00000029610, ENSMUSG00000036860, ENSMUSG00000016510, ENSMUSG00000024360, ENSMUSG00000018858, ENSMUSG00000000740, ENSMUSG00000060143, ENSMUSG00000058558, ENSMUSG00000062997, ENSMUSG00000028156, ENSMUSG00000032604, ENSMUSG00000037563, ENSMUSG00000021266, ENSMUSG00000032215, ENSMUSG00000019977, ENSMUSG00000022889, ENSMUSG00000041841, ENSMUSG00000039804, ENSMUSG00000024902,…	1.8794	0.0410124	3.38708
GOTERM_BP_5	GO:0008380~RNA splicing	35	3.47418e-05	ENSMUSG00000029817, ENSMUSG00000033565, ENSMUSG00000027905, ENSMUSG00000021413, ENSMUSG00000020863, ENSMUSG00000032621, ENSMUSG00000022023, ENSMUSG00000028676, ENSMUSG00000032423, ENSMUSG00000061136, ENSMUSG00000028180, ENSMUSG00000014776, ENSMUSG00000028820, ENSMUSG00000035597, ENSMUSG00000060475, ENSMUSG00000071172, ENSMUSG00000061479, ENSMUSG00000025982, ENSMUSG00000021431, ENSMUSG00000039218,…	2.13052	0.0581594	3.23538
GOTERM_BP_5	GO:0030163~protein catabolic process	72	9.41966e-05	ENSMUSG00000032307, ENSMUSG00000003226, ENSMUSG00000039701, ENSMUSG00000038965, ENSMUSG00000026771, ENSMUSG00000025616, ENSMUSG00000026775, ENSMUSG00000030451, ENSMUSG00000031878, ENSMUSG00000036432, ENSMUSG00000004364, ENSMUSG00000041528, ENSMUSG00000035764, ENSMUSG00000032905, ENSMUSG00000032217, ENSMUSG00000055720, ENSMUSG00000041264, ENSMUSG00000028309, ENSMUSG00000024294, ENSMUSG00000035293,…	1.58443	0.157616	2.8024
GOTERM_BP_5	GO:0044257~cellular protein catabolic process	70	9.77493e-05	ENSMUSG00000032307, ENSMUSG00000003226, ENSMUSG00000039701, ENSMUSG00000038965, ENSMUSG00000026771, ENSMUSG00000025616, ENSMUSG00000030451, ENSMUSG00000031878, ENSMUSG00000036432, ENSMUSG00000004364, ENSMUSG00000041528, ENSMUSG00000035764, ENSMUSG00000032905, ENSMUSG00000032217, ENSMUSG00000055720, ENSMUSG00000041264, ENSMUSG00000028309, ENSMUSG00000024294, ENSMUSG00000035293, ENSMUSG00000022772,…	1.59492	0.163556	2.78633
GOTERM_BP_5	GO:0043632~modification-dependent macromolecule catabolic process	67	9.80039e-05	ENSMUSG00000032307, ENSMUSG00000003226, ENSMUSG00000039701, ENSMUSG00000038965, ENSMUSG00000026771, ENSMUSG00000025616, ENSMUSG00000030451, ENSMUSG00000031878, ENSMUSG00000036432, ENSMUSG00000004364, ENSMUSG00000041528, ENSMUSG00000035764, ENSMUSG00000032905, ENSMUSG00000032217, ENSMUSG00000055720, ENSMUSG00000041264, ENSMUSG00000028309, ENSMUSG00000024294, ENSMUSG00000035293, ENSMUSG00000022772,…	1.61371	0.163982	2.7852
GOTERM_BP_5	GO:0007264~small GTPase mediated signal transduction	40	0.000124888	ENSMUSG00000031442, ENSMUSG00000024944, ENSMUSG00000003037, ENSMUSG00000019173, ENSMUSG00000034801, ENSMUSG00000066129, ENSMUSG00000009621, ENSMUSG00000017418, ENSMUSG00000049907, ENSMUSG00000008859, ENSMUSG00000015291, ENSMUSG00000020671, ENSMUSG00000028945, ENSMUSG00000021062, ENSMUSG00000053291, ENSMUSG00000030265, ENSMUSG00000024290, ENSMUSG00000054855, ENSMUSG00000026878, ENSMUSG00000024096,…	1.89694	0.208919	2.68002
GOTERM_BP_5	GO:0007242~intracellular signaling cascade	105	0.000276039	ENSMUSG00000031442, ENSMUSG00000050711, ENSMUSG00000053137, ENSMUSG00000022951, ENSMUSG00000031714, ENSMUSG00000033307, ENSMUSG00000059866, ENSMUSG00000024639, ENSMUSG00000020372, ENSMUSG00000009621, ENSMUSG00000041261, ENSMUSG00000025199, ENSMUSG00000053693, ENSMUSG00000020671, ENSMUSG00000024151, ENSMUSG00000021062, ENSMUSG00000053291, ENSMUSG00000024789, ENSMUSG00000030265, ENSMUSG00000054855,…	1.40405	0.461226	2.33609
GOTERM_BP_5	GO:0030522~intracellular receptor-mediated signaling pathway	10	0.000780003	ENSMUSG00000033863, ENSMUSG00000033565, ENSMUSG00000071072, ENSMUSG00000029004, ENSMUSG00000030357, ENSMUSG00000013833, ENSMUSG00000063415, ENSMUSG00000025326, ENSMUSG00000032185, ENSMUSG00000051316	3.82353	1.29813	1.88668
GOTERM_BP_5	GO:0006886~intracellular protein transport	39	0.000983735	ENSMUSG00000078185, ENSMUSG00000029198, ENSMUSG00000039016, ENSMUSG00000003033, ENSMUSG00000055116, ENSMUSG00000025142, ENSMUSG00000021248, ENSMUSG00000018326, ENSMUSG00000041794, ENSMUSG00000004849, ENSMUSG00000067279, ENSMUSG00000030082, ENSMUSG00000020961, ENSMUSG00000061455, ENSMUSG00000059552, ENSMUSG00000020671, ENSMUSG00000009090, ENSMUSG00000021124, ENSMUSG00000022285, ENSMUSG00000000531,…	1.7289	1.63457	1.7866
GOTERM_BP_5	GO:0051052~regulation of DNA metabolic process	13	0.00217466	ENSMUSG00000032740, ENSMUSG00000056216, ENSMUSG00000029920, ENSMUSG00000021149, ENSMUSG00000007872, ENSMUSG00000052139, ENSMUSG00000002147, ENSMUSG00000031201, ENSMUSG00000031820, ENSMUSG00000059552, ENSMUSG00000025932, ENSMUSG00000024151, ENSMUSG00000025878	2.74239	3.5798	1.44614
GOTERM_BP_5	GO:0016310~phosphorylation	81	0.00244459	ENSMUSG00000021413, ENSMUSG00000025060, ENSMUSG00000038967, ENSMUSG00000027207, ENSMUSG00000055523, ENSMUSG00000053137, ENSMUSG00000018209, ENSMUSG00000031714, ENSMUSG00000050697, ENSMUSG00000030397, ENSMUSG00000022956, ENSMUSG00000031644, ENSMUSG00000052889, ENSMUSG00000000416, ENSMUSG00000025199, ENSMUSG00000053693, ENSMUSG00000059534, ENSMUSG00000017291, ENSMUSG00000025651, ENSMUSG00000003534,…	1.3803	4.01563	1.39625
GOTERM_BP_5	GO:0006457~protein folding	21	0.00325287	ENSMUSG00000003226, ENSMUSG00000029198, ENSMUSG00000015757, ENSMUSG00000031197, ENSMUSG00000028035, ENSMUSG00000030357, ENSMUSG00000036052, ENSMUSG00000032525, ENSMUSG00000015656, ENSMUSG00000003814, ENSMUSG00000024359, ENSMUSG00000005483, ENSMUSG00000004460, ENSMUSG00000061118, ENSMUSG00000026740, ENSMUSG00000024346, ENSMUSG00000020048, ENSMUSG00000024222, ENSMUSG00000029657, ENSMUSG00000027804,…	2.02316	5.30967	1.27493
GOTERM_BP_5	GO:0045739~positive regulation of DNA repair	6	0.00385016	ENSMUSG00000031201, ENSMUSG00000056216, ENSMUSG00000052139, ENSMUSG00000031820, ENSMUSG00000025932, ENSMUSG00000025878	5.2437	6.25534	1.20375
GOTERM_BP_5	GO:0032869~cellular response to insulin stimulus	10	0.00696649	ENSMUSG00000001729, ENSMUSG00000037112, ENSMUSG00000038894, ENSMUSG00000024539, ENSMUSG00000019699, ENSMUSG00000041417, ENSMUSG00000030671, ENSMUSG00000038485, ENSMUSG00000032253, ENSMUSG00000019970	2.84542	11.047
GOTERM_BP_5	GO:0000075~cell cycle checkpoint	11	0.00847539	ENSMUSG00000043991, ENSMUSG00000031201, ENSMUSG00000024537, ENSMUSG00000035390, ENSMUSG00000032534, ENSMUSG00000052139, ENSMUSG00000031820, ENSMUSG00000059552, ENSMUSG00000022601, ENSMUSG00000024151, ENSMUSG00000025878	2.58824	13.2835
GOTERM_BP_5	GO:0006122~mitochondrial electron transport, ubiquinol to cytochrome c	4	0.00899409	ENSMUSG00000021520, ENSMUSG00000020163, ENSMUSG00000059534, ENSMUSG00000025651	8.15686	14.04
GOTERM_BP_5	GO:0006282~regulation of DNA repair	6	0.00968775	ENSMUSG00000031201, ENSMUSG00000056216, ENSMUSG00000052139, ENSMUSG00000031820, ENSMUSG00000025932, ENSMUSG00000025878	4.31834	15.042
GOTERM_BP_5	GO:0045934~negative regulation of nucleobase, nucleoside, nucleotide and nucleic acid metabolic process	47	0.00969569	ENSMUSG00000041483, ENSMUSG00000040363, ENSMUSG00000033565, ENSMUSG00000027905, ENSMUSG00000027387, ENSMUSG00000021149, ENSMUSG00000007872, ENSMUSG00000018476, ENSMUSG00000036052, ENSMUSG00000008305, ENSMUSG00000020453, ENSMUSG00000035877, ENSMUSG00000026739, ENSMUSG00000031715, ENSMUSG00000018501, ENSMUSG00000028676, ENSMUSG00000003382, ENSMUSG00000040481, ENSMUSG00000027177, ENSMUSG00000031609,…	1.44851	15.0534
GOTERM_BP_5	GO:0051172~negative regulation of nitrogen compound metabolic process	47	0.0115909	ENSMUSG00000041483, ENSMUSG00000040363, ENSMUSG00000033565, ENSMUSG00000027905, ENSMUSG00000027387, ENSMUSG00000021149, ENSMUSG00000007872, ENSMUSG00000018476, ENSMUSG00000036052, ENSMUSG00000008305, ENSMUSG00000020453, ENSMUSG00000035877, ENSMUSG00000026739, ENSMUSG00000031715, ENSMUSG00000018501, ENSMUSG00000028676, ENSMUSG00000003382, ENSMUSG00000040481, ENSMUSG00000027177, ENSMUSG00000031609,…	1.43406	17.7349
GOTERM_BP_5	GO:0016481~negative regulation of transcription	44	0.0126492	ENSMUSG00000041483, ENSMUSG00000040363, ENSMUSG00000033565, ENSMUSG00000027905, ENSMUSG00000027387, ENSMUSG00000007872, ENSMUSG00000018476, ENSMUSG00000036052, ENSMUSG00000008305, ENSMUSG00000020453, ENSMUSG00000035877, ENSMUSG00000026739, ENSMUSG00000031715, ENSMUSG00000018501, ENSMUSG00000003382, ENSMUSG00000040481, ENSMUSG00000027177, ENSMUSG00000031609, ENSMUSG00000059552, ENSMUSG00000027582,…	1.44719	19.1975
GOTERM_BP_5	GO:0031324~negative regulation of cellular metabolic process	55	0.0136318	ENSMUSG00000027387, ENSMUSG00000018476, ENSMUSG00000026739, ENSMUSG00000031715, ENSMUSG00000028676, ENSMUSG00000018501, ENSMUSG00000028842, ENSMUSG00000040481, ENSMUSG00000035914, ENSMUSG00000016481, ENSMUSG00000031609, ENSMUSG00000027582, ENSMUSG00000021039, ENSMUSG00000023224, ENSMUSG00000024151, ENSMUSG00000048001, ENSMUSG00000021738, ENSMUSG00000027680, ENSMUSG00000022091, ENSMUSG00000043991,…	1.37616	20.5335
GOTERM_BP_5	GO:0010558~negative regulation of macromolecule biosynthetic process	48	0.0152009	ENSMUSG00000041483, ENSMUSG00000040363, ENSMUSG00000033565, ENSMUSG00000027905, ENSMUSG00000027387, ENSMUSG00000021149, ENSMUSG00000007872, ENSMUSG00000018476, ENSMUSG00000036052, ENSMUSG00000008305, ENSMUSG00000020453, ENSMUSG00000035877, ENSMUSG00000026739, ENSMUSG00000031715, ENSMUSG00000018501, ENSMUSG00000028842, ENSMUSG00000003382, ENSMUSG00000040481, ENSMUSG00000027177, ENSMUSG00000035914,…	1.40501	22.6241
GOTERM_BP_5	GO:0031570~DNA integrity checkpoint	8	0.0154284	ENSMUSG00000031201, ENSMUSG00000035390, ENSMUSG00000032534, ENSMUSG00000052139, ENSMUSG00000031820, ENSMUSG00000059552, ENSMUSG00000024151, ENSMUSG00000025878	2.96613	22.9229
GOTERM_BP_5	GO:0010629~negative regulation of gene expression	47	0.0167055	ENSMUSG00000041483, ENSMUSG00000040363, ENSMUSG00000033565, ENSMUSG00000027905, ENSMUSG00000027387, ENSMUSG00000007872, ENSMUSG00000018476, ENSMUSG00000036052, ENSMUSG00000008305, ENSMUSG00000020453, ENSMUSG00000035877, ENSMUSG00000026739, ENSMUSG00000031715, ENSMUSG00000018501, ENSMUSG00000028842, ENSMUSG00000003382, ENSMUSG00000040481, ENSMUSG00000027177, ENSMUSG00000031609, ENSMUSG00000059552,…	1.40258	24.58
PANTHER_BP_ALL	BP00060:Protein metabolism and modification	287	3.28618e-08	ENSMUSG00000018199, ENSMUSG00000024360, ENSMUSG00000020128, ENSMUSG00000025616, ENSMUSG00000032252, ENSMUSG00000038696, ENSMUSG00000036432, ENSMUSG00000037563, ENSMUSG00000021266, ENSMUSG00000042599, ENSMUSG00000019977, ENSMUSG00000030397, ENSMUSG00000031644, ENSMUSG00000053693, ENSMUSG00000023224, ENSMUSG00000019970, ENSMUSG00000040820, ENSMUSG00000024789, ENSMUSG00000042719, ENSMUSG00000037805,…	1.33179	4.14209e-05	6.38278
PANTHER_BP_ALL	BP00031:Nucleoside, nucleotide and nucleic acid metabolism	297	1.29893e-07	ENSMUSG00000018199, ENSMUSG00000041199, ENSMUSG00000069274, ENSMUSG00000053289, ENSMUSG00000026739, ENSMUSG00000018501, ENSMUSG00000032503, ENSMUSG00000022956, ENSMUSG00000022500, ENSMUSG00000042197, ENSMUSG00000059475, ENSMUSG00000029169, ENSMUSG00000035293, ENSMUSG00000042712, ENSMUSG00000013089, ENSMUSG00000033623, ENSMUSG00000031659, ENSMUSG00000057093, ENSMUSG00000020706, ENSMUSG00000051451,…	1.30507	0.000163724	5.78589
PANTHER_BP_ALL	BP00125:Intracellular protein traffic	109	1.93998e-07	ENSMUSG00000028385, ENSMUSG00000078185, ENSMUSG00000021071, ENSMUSG00000029616, ENSMUSG00000029432, ENSMUSG00000024261, ENSMUSG00000002043, ENSMUSG00000039637, ENSMUSG00000030731, ENSMUSG00000056429, ENSMUSG00000029580, ENSMUSG00000074909, ENSMUSG00000030082, ENSMUSG00000061244, ENSMUSG00000029712, ENSMUSG00000061455, ENSMUSG00000031788, ENSMUSG00000020671, ENSMUSG00000034187, ENSMUSG00000021124,…	1.64498	0.000244525	5.61168
PANTHER_BP_ALL	BP00062:Protein folding	30	9.70658e-07	ENSMUSG00000029198, ENSMUSG00000028035, ENSMUSG00000030357, ENSMUSG00000036052, ENSMUSG00000032525, ENSMUSG00000015656, ENSMUSG00000003814, ENSMUSG00000026864, ENSMUSG00000020288, ENSMUSG00000024346, ENSMUSG00000027808, ENSMUSG00000024222, ENSMUSG00000027804, ENSMUSG00000015757, ENSMUSG00000031197, ENSMUSG00000005936, ENSMUSG00000004937, ENSMUSG00000020361, ENSMUSG00000030847, ENSMUSG00000024359,…	2.75319	0.00122346	4.91241
PANTHER_BP_ALL	BP00063:Protein modification	124	6.51262e-06	ENSMUSG00000032307, ENSMUSG00000022453, ENSMUSG00000025060, ENSMUSG00000053137, ENSMUSG00000008090, ENSMUSG00000025823, ENSMUSG00000038696, ENSMUSG00000031878, ENSMUSG00000030397, ENSMUSG00000037470, ENSMUSG00000031644, ENSMUSG00000020571, ENSMUSG00000028788, ENSMUSG00000025199, ENSMUSG00000053693, ENSMUSG00000040820, ENSMUSG00000019970, ENSMUSG00000032571, ENSMUSG00000024789, ENSMUSG00000042719,…	1.48128	0.00820855	4.08573
PANTHER_BP_ALL	BP00064:Protein phosphorylation	75	0.000142012	ENSMUSG00000021413, ENSMUSG00000025060, ENSMUSG00000038967, ENSMUSG00000053137, ENSMUSG00000018209, ENSMUSG00000032601, ENSMUSG00000008090, ENSMUSG00000038696, ENSMUSG00000050697, ENSMUSG00000030397, ENSMUSG00000031644, ENSMUSG00000028788, ENSMUSG00000052889, ENSMUSG00000025199, ENSMUSG00000053693, ENSMUSG00000017291, ENSMUSG00000003534, ENSMUSG00000022607, ENSMUSG00000060477, ENSMUSG00000019970,…	1.5505	0.178853	2.7475
PANTHER_BP_ALL	BP00276:General vesicle transport	34	0.000391249	ENSMUSG00000078185, ENSMUSG00000053841, ENSMUSG00000029432, ENSMUSG00000003380, ENSMUSG00000003037, ENSMUSG00000019173, ENSMUSG00000035126, ENSMUSG00000049550, ENSMUSG00000017418, ENSMUSG00000061455, ENSMUSG00000022765, ENSMUSG00000015291, ENSMUSG00000035226, ENSMUSG00000020671, ENSMUSG00000009090, ENSMUSG00000021124, ENSMUSG00000047694, ENSMUSG00000021062, ENSMUSG00000053291, ENSMUSG00000015214,…	1.91619	0.492034	2.30801
PANTHER_BP_ALL	BP00178:Stress response	29	0.000578007	ENSMUSG00000015656, ENSMUSG00000028341, ENSMUSG00000049796, ENSMUSG00000050697, ENSMUSG00000026864, ENSMUSG00000024387, ENSMUSG00000020288, ENSMUSG00000004054, ENSMUSG00000026826, ENSMUSG00000027808, ENSMUSG00000031068, ENSMUSG00000056501, ENSMUSG00000021287, ENSMUSG00000022607, ENSMUSG00000021025, ENSMUSG00000030655, ENSMUSG00000030595, ENSMUSG00000053004, ENSMUSG00000024359, ENSMUSG00000024095,…	1.99944	0.726113	2.139
PANTHER_BP_ALL	BP00203:Cell cycle	91	0.000711453	ENSMUSG00000049086, ENSMUSG00000030357, ENSMUSG00000073910, ENSMUSG00000017485, ENSMUSG00000045007, ENSMUSG00000063049, ENSMUSG00000031878, ENSMUSG00000004364, ENSMUSG00000039637, ENSMUSG00000040681, ENSMUSG00000029580, ENSMUSG00000026434, ENSMUSG00000027829, ENSMUSG00000034201, ENSMUSG00000030584, ENSMUSG00000029712, ENSMUSG00000025856, ENSMUSG00000031787, ENSMUSG00000023067, ENSMUSG00000029068,…	1.40935	0.893061	2.04912
PANTHER_BP_ALL	BP00048:mRNA splicing	27	0.0032258	ENSMUSG00000029817, ENSMUSG00000052137, ENSMUSG00000028034, ENSMUSG00000046667, ENSMUSG00000028676, ENSMUSG00000038774, ENSMUSG00000032423, ENSMUSG00000032212, ENSMUSG00000028820, ENSMUSG00000027829, ENSMUSG00000032480, ENSMUSG00000071172, ENSMUSG00000061479, ENSMUSG00000025982, ENSMUSG00000020180, ENSMUSG00000029169, ENSMUSG00000004994, ENSMUSG00000024095, ENSMUSG00000027620, ENSMUSG00000024097,…	1.83362	3.99073	1.39895
PANTHER_BP_ALL	BP00282:Mitosis	38	0.003949	ENSMUSG00000062825, ENSMUSG00000073910, ENSMUSG00000028826, ENSMUSG00000027671, ENSMUSG00000045007, ENSMUSG00000039637, ENSMUSG00000049550, ENSMUSG00000029580, ENSMUSG00000026434, ENSMUSG00000029712, ENSMUSG00000031787, ENSMUSG00000037286, ENSMUSG00000024576, ENSMUSG00000028896, ENSMUSG00000029062, ENSMUSG00000001833, ENSMUSG00000036403, ENSMUSG00000036990, ENSMUSG00000024293, ENSMUSG00000025862,…	1.61796	4.86506	1.31291
PANTHER_BP_ALL	BP00040:mRNA transcription	163	0.00395439	ENSMUSG00000002147, ENSMUSG00000026739, ENSMUSG00000018501, ENSMUSG00000031715, ENSMUSG00000028389, ENSMUSG00000020889, ENSMUSG00000022708, ENSMUSG00000029238, ENSMUSG00000022500, ENSMUSG00000014776, ENSMUSG00000042197, ENSMUSG00000037475, ENSMUSG00000059475, ENSMUSG00000022463, ENSMUSG00000035293, ENSMUSG00000078870, ENSMUSG00000020484, ENSMUSG00000074220, ENSMUSG00000042712, ENSMUSG00000013089,…	1.22114	4.87155	1.31233
PANTHER_BP_ALL	BP00069:Protein disulfide-isomerase reaction	6	0.00625366	ENSMUSG00000038991, ENSMUSG00000020571, ENSMUSG00000024614, ENSMUSG00000025823, ENSMUSG00000027248, ENSMUSG00000033684	4.79378	7.60267	1.11903
PANTHER_BP_ALL	BP00224:Cell proliferation and differentiation	85	0.00781275	ENSMUSG00000028670, ENSMUSG00000026917, ENSMUSG00000035431, ENSMUSG00000002147, ENSMUSG00000008090, ENSMUSG00000028389, ENSMUSG00000063049, ENSMUSG00000000489, ENSMUSG00000036432, ENSMUSG00000039637, ENSMUSG00000015094, ENSMUSG00000026058, ENSMUSG00000042097, ENSMUSG00000027829, ENSMUSG00000038146, ENSMUSG00000030584, ENSMUSG00000052889, ENSMUSG00000025856, ENSMUSG00000024962, ENSMUSG00000023067,…	1.31045	9.41331	1.02626
PANTHER_BP_ALL	BP00140:Other protein targeting and localization	6	0.00814277	ENSMUSG00000033365, ENSMUSG00000024045, ENSMUSG00000018326, ENSMUSG00000002625, ENSMUSG00000076432, ENSMUSG00000022285	4.52746	9.79236	1.00911
PANTHER_BP_ALL	BP00047:Pre-mRNA processing	32	0.0104064	ENSMUSG00000029817, ENSMUSG00000052137, ENSMUSG00000028034, ENSMUSG00000046667, ENSMUSG00000039652, ENSMUSG00000022160, ENSMUSG00000028676, ENSMUSG00000038774, ENSMUSG00000032423, ENSMUSG00000032212, ENSMUSG00000028820, ENSMUSG00000027829, ENSMUSG00000032480, ENSMUSG00000071172, ENSMUSG00000061479, ENSMUSG00000025982, ENSMUSG00000020180, ENSMUSG00000029169, ENSMUSG00000004994, ENSMUSG00000024095,…	1.59207	12.3533
PANTHER_BP_ALL	BP00077:Oxidative phosphorylation	12	0.0155736	ENSMUSG00000059734, ENSMUSG00000022450, ENSMUSG00000021520, ENSMUSG00000030785, ENSMUSG00000005510, ENSMUSG00000038690, ENSMUSG00000022551, ENSMUSG00000020163, ENSMUSG00000059534, ENSMUSG00000040048, ENSMUSG00000017778, ENSMUSG00000026489	2.26373	17.9501
PANTHER_BP_ALL	BP00129:Endocytosis	29	0.0215802	ENSMUSG00000062825, ENSMUSG00000003033, ENSMUSG00000027671, ENSMUSG00000019173, ENSMUSG00000039637, ENSMUSG00000029580, ENSMUSG00000042429, ENSMUSG00000029712, ENSMUSG00000020659, ENSMUSG00000036499, ENSMUSG00000020695, ENSMUSG00000028136, ENSMUSG00000024576, ENSMUSG00000073643, ENSMUSG00000053291, ENSMUSG00000020640, ENSMUSG00000028049, ENSMUSG00000026878, ENSMUSG00000030704, ENSMUSG00000077450,…	1.54466	24.0417
KEGG_PATHWAY	mmu03010:Ribosome	21	6.23103e-06	ENSMUSG00000028936, ENSMUSG00000034892, ENSMUSG00000063316, ENSMUSG00000000740, ENSMUSG00000003429, ENSMUSG00000060143, ENSMUSG00000037805, ENSMUSG00000058558, ENSMUSG00000062997, ENSMUSG00000046364, ENSMUSG00000038274, ENSMUSG00000037563, ENSMUSG00000032215, ENSMUSG00000041841, ENSMUSG00000067288, ENSMUSG00000060938, ENSMUSG00000049751, ENSMUSG00000057841, ENSMUSG00000057863, ENSMUSG00000022601,…	3.14132	0.00756317	4.1213
KEGG_PATHWAY	mmu04722:Neurotrophin signaling pathway	26	8.75597e-06	ENSMUSG00000048482, ENSMUSG00000053137, ENSMUSG00000031714, ENSMUSG00000018326, ENSMUSG00000034801, ENSMUSG00000024617, ENSMUSG00000001729, ENSMUSG00000021180, ENSMUSG00000059552, ENSMUSG00000060477, ENSMUSG00000063065, ENSMUSG00000022285, ENSMUSG00000024959, ENSMUSG00000021025, ENSMUSG00000030265, ENSMUSG00000019699, ENSMUSG00000041417, ENSMUSG00000030595, ENSMUSG00000031309, ENSMUSG00000038894,…	2.66265	0.0106278	3.97356
KEGG_PATHWAY	mmu05215:Prostate cancer	19	9.43416e-05	ENSMUSG00000028991, ENSMUSG00000024959, ENSMUSG00000021025, ENSMUSG00000030265, ENSMUSG00000030849, ENSMUSG00000019699, ENSMUSG00000041417, ENSMUSG00000000489, ENSMUSG00000034801, ENSMUSG00000001729, ENSMUSG00000024620, ENSMUSG00000057329, ENSMUSG00000024122, ENSMUSG00000025856, ENSMUSG00000059552, ENSMUSG00000020048, ENSMUSG00000025199, ENSMUSG00000023067, ENSMUSG00000063065	2.81057	0.114455	2.94137
KEGG_PATHWAY	mmu03040:Spliceosome	23	0.000108791	ENSMUSG00000029817, ENSMUSG00000020180, ENSMUSG00000029169, ENSMUSG00000031157, ENSMUSG00000039630, ENSMUSG00000015656, ENSMUSG00000028676, ENSMUSG00000024097, ENSMUSG00000061136, ENSMUSG00000018379, ENSMUSG00000024498, ENSMUSG00000051695, ENSMUSG00000059970, ENSMUSG00000020850, ENSMUSG00000078348, ENSMUSG00000037475, ENSMUSG00000071172, ENSMUSG00000022185, ENSMUSG00000061479, ENSMUSG00000037361,…	2.46939	0.131974	2.87951
KEGG_PATHWAY	mmu04810:Regulation of actin cytoskeleton	31	0.00069884	ENSMUSG00000062825, ENSMUSG00000018293, ENSMUSG00000049775, ENSMUSG00000000489, ENSMUSG00000034801, ENSMUSG00000034868, ENSMUSG00000029580, ENSMUSG00000009621, ENSMUSG00000020639, ENSMUSG00000029684, ENSMUSG00000019907, ENSMUSG00000025856, ENSMUSG00000031137, ENSMUSG00000022607, ENSMUSG00000063065, ENSMUSG00000037926, ENSMUSG00000006304, ENSMUSG00000030265, ENSMUSG00000024290, ENSMUSG00000030849,…	1.90189	0.844981	2.07315
KEGG_PATHWAY	mmu04510:Focal adhesion	29	0.000730188	ENSMUSG00000062825, ENSMUSG00000031502, ENSMUSG00000000489, ENSMUSG00000034801, ENSMUSG00000001729, ENSMUSG00000034868, ENSMUSG00000029580, ENSMUSG00000009621, ENSMUSG00000022438, ENSMUSG00000052889, ENSMUSG00000019907, ENSMUSG00000024962, ENSMUSG00000025856, ENSMUSG00000022607, ENSMUSG00000063065, ENSMUSG00000024959, ENSMUSG00000024290, ENSMUSG00000030890, ENSMUSG00000019699, ENSMUSG00000019843,…	1.94992	0.88273	2.05417
KEGG_PATHWAY	mmu05214:Glioma	14	0.000751468	ENSMUSG00000028991, ENSMUSG00000030265, ENSMUSG00000019699, ENSMUSG00000041417, ENSMUSG00000000489, ENSMUSG00000034801, ENSMUSG00000024617, ENSMUSG00000001729, ENSMUSG00000024620, ENSMUSG00000052889, ENSMUSG00000059552, ENSMUSG00000025856, ENSMUSG00000023067, ENSMUSG00000063065	2.91227	0.908348	2.04175
KEGG_PATHWAY	mmu04010:MAPK signaling pathway	35	0.00119956	ENSMUSG00000024242, ENSMUSG00000048482, ENSMUSG00000053137, ENSMUSG00000018209, ENSMUSG00000015656, ENSMUSG00000000489, ENSMUSG00000034801, ENSMUSG00000001729, ENSMUSG00000021096, ENSMUSG00000004054, ENSMUSG00000052889, ENSMUSG00000021180, ENSMUSG00000025856, ENSMUSG00000017291, ENSMUSG00000057914, ENSMUSG00000059552, ENSMUSG00000025199, ENSMUSG00000031137, ENSMUSG00000063065, ENSMUSG00000030265,…	1.75835	1.44638	1.83972
KEGG_PATHWAY	mmu05200:Pathways in cancer	40	0.00171481	ENSMUSG00000031502, ENSMUSG00000018209, ENSMUSG00000025423, ENSMUSG00000000489, ENSMUSG00000034801, ENSMUSG00000001729, ENSMUSG00000027940, ENSMUSG00000052889, ENSMUSG00000008859, ENSMUSG00000025856, ENSMUSG00000024962, ENSMUSG00000059552, ENSMUSG00000025199, ENSMUSG00000023067, ENSMUSG00000031137, ENSMUSG00000048701, ENSMUSG00000022607, ENSMUSG00000024151, ENSMUSG00000032487, ENSMUSG00000063065,…	1.6487	2.06172	1.68577
KEGG_PATHWAY	mmu04150:mTOR signaling pathway	12	0.00184684	ENSMUSG00000028991, ENSMUSG00000001729, ENSMUSG00000031309, ENSMUSG00000036707, ENSMUSG00000024122, ENSMUSG00000019699, ENSMUSG00000041417, ENSMUSG00000024962, ENSMUSG00000028156, ENSMUSG00000028945, ENSMUSG00000050697, ENSMUSG00000063065	2.95849	2.21884	1.65387
KEGG_PATHWAY	mmu05213:Endometrial cancer	11	0.00456889	ENSMUSG00000001729, ENSMUSG00000000303, ENSMUSG00000024959, ENSMUSG00000030265, ENSMUSG00000030890, ENSMUSG00000024122, ENSMUSG00000019699, ENSMUSG00000041417, ENSMUSG00000059552, ENSMUSG00000034801, ENSMUSG00000063065	2.81626	5.40691	1.26705
KEGG_PATHWAY	mmu05016:Huntington's disease	25	0.00470701	ENSMUSG00000059734, ENSMUSG00000022450, ENSMUSG00000005510, ENSMUSG00000048482, ENSMUSG00000019738, ENSMUSG00000029632, ENSMUSG00000058440, ENSMUSG00000020163, ENSMUSG00000040048, ENSMUSG00000024639, ENSMUSG00000030785, ENSMUSG00000021520, ENSMUSG00000063856, ENSMUSG00000022956, ENSMUSG00000028478, ENSMUSG00000022551, ENSMUSG00000059534, ENSMUSG00000059552, ENSMUSG00000025651, ENSMUSG00000008036,…	1.81875	5.5661	1.25445
KEGG_PATHWAY	mmu00330:Arginine and proline metabolism	11	0.00526534	ENSMUSG00000018906, ENSMUSG00000035561, ENSMUSG00000010025, ENSMUSG00000025283, ENSMUSG00000019916, ENSMUSG00000020150, ENSMUSG00000069835, ENSMUSG00000026103, ENSMUSG00000031672, ENSMUSG00000025190, ENSMUSG00000071708	2.76312	6.20713	1.20711
KEGG_PATHWAY	mmu05218:Melanoma	13	0.00593469	ENSMUSG00000024959, ENSMUSG00000030265, ENSMUSG00000019699, ENSMUSG00000041417, ENSMUSG00000000489, ENSMUSG00000001729, ENSMUSG00000000303, ENSMUSG00000024620, ENSMUSG00000059552, ENSMUSG00000025856, ENSMUSG00000023067, ENSMUSG00000031137, ENSMUSG00000063065	2.43763	6.97034	1.15675
KEGG_PATHWAY	mmu05223:Non-small cell lung cancer	11	0.00604228	ENSMUSG00000001729, ENSMUSG00000024959, ENSMUSG00000030265, ENSMUSG00000018209, ENSMUSG00000052889, ENSMUSG00000024122, ENSMUSG00000019699, ENSMUSG00000041417, ENSMUSG00000059552, ENSMUSG00000034801, ENSMUSG00000063065	2.71195	7.09248	1.1492
KEGG_PATHWAY	mmu04910:Insulin signaling pathway	20	0.00676583	ENSMUSG00000028991, ENSMUSG00000024959, ENSMUSG00000030265, ENSMUSG00000032601, ENSMUSG00000019699, ENSMUSG00000041417, ENSMUSG00000025153, ENSMUSG00000005469, ENSMUSG00000028156, ENSMUSG00000034801, ENSMUSG00000050697, ENSMUSG00000020538, ENSMUSG00000001729, ENSMUSG00000014956, ENSMUSG00000067279, ENSMUSG00000038894, ENSMUSG00000024122, ENSMUSG00000030671, ENSMUSG00000028945, ENSMUSG00000063065	1.92945	7.9101	1.10182
KEGG_PATHWAY	mmu04920:Adipocytokine signaling pathway	12	0.0102844	ENSMUSG00000028991, ENSMUSG00000001729, ENSMUSG00000021025, ENSMUSG00000038894, ENSMUSG00000024789, ENSMUSG00000007783, ENSMUSG00000019699, ENSMUSG00000025199, ENSMUSG00000030595, ENSMUSG00000032883, ENSMUSG00000030168, ENSMUSG00000050697	2.38446	11.7928
KEGG_PATHWAY	mmu05210:Colorectal cancer	14	0.0110303	ENSMUSG00000022297, ENSMUSG00000024959, ENSMUSG00000030265, ENSMUSG00000019699, ENSMUSG00000041417, ENSMUSG00000034801, ENSMUSG00000001729, ENSMUSG00000021250, ENSMUSG00000024620, ENSMUSG00000007989, ENSMUSG00000057329, ENSMUSG00000059552, ENSMUSG00000024151, ENSMUSG00000063065	2.16727	12.5963
KEGG_PATHWAY	mmu04012:ErbB signaling pathway	14	0.0121148	ENSMUSG00000028991, ENSMUSG00000024959, ENSMUSG00000066877, ENSMUSG00000030265, ENSMUSG00000019699, ENSMUSG00000031714, ENSMUSG00000041417, ENSMUSG00000034801, ENSMUSG00000024617, ENSMUSG00000001729, ENSMUSG00000052889, ENSMUSG00000023067, ENSMUSG00000022607, ENSMUSG00000063065	2.14236	13.7527
KEGG_PATHWAY	mmu03018:RNA degradation	11	0.0127381	ENSMUSG00000063524, ENSMUSG00000027714, ENSMUSG00000020464, ENSMUSG00000035649, ENSMUSG00000034259, ENSMUSG00000064193, ENSMUSG00000034321, ENSMUSG00000024359, ENSMUSG00000034724, ENSMUSG00000021111, ENSMUSG00000038784, ENSMUSG00000037296	2.44076	14.4109
KEGG_PATHWAY	mmu00230:Purine metabolism	21	0.0128662	ENSMUSG00000069094, ENSMUSG00000041624, ENSMUSG00000030726, ENSMUSG00000019738, ENSMUSG00000020736, ENSMUSG00000028527, ENSMUSG00000020464, ENSMUSG00000020899, ENSMUSG00000028099, ENSMUSG00000006678, ENSMUSG00000031659, ENSMUSG00000027427, ENSMUSG00000005686, ENSMUSG00000014554, ENSMUSG00000006589, ENSMUSG00000021699, ENSMUSG00000030671, ENSMUSG00000000253, ENSMUSG00000039771, ENSMUSG00000004667,…	1.78075	14.5456
KEGG_PATHWAY	mmu04710:Circadian rhythm	5	0.0128991	ENSMUSG00000055866, ENSMUSG00000029238, ENSMUSG00000020038, ENSMUSG00000055116, ENSMUSG00000020889	5.12047	14.5802
KEGG_PATHWAY	mmu05216:Thyroid cancer	7	0.0184916	ENSMUSG00000000303, ENSMUSG00000027940, ENSMUSG00000006005, ENSMUSG00000030265, ENSMUSG00000059552, ENSMUSG00000048701, ENSMUSG00000063065	3.21354	20.2727
KEGG_PATHWAY	mmu04320:Dorso-ventral axis formation	6	0.0209479	ENSMUSG00000026923, ENSMUSG00000022895, ENSMUSG00000038146, ENSMUSG00000030265, ENSMUSG00000034801, ENSMUSG00000063065	3.63088	22.6611

## Sheet: exGF SI (GSEA)
UP
Function	Normalized enrichment score (NES)	FDR q-value
GO_bp
MRNA_METABOLIC_PROCESS	2.14	0.006
NEGATIVE_REGULATION_OF_NUCLEOBASENUCLEOSIDENUCLEOTIDE_AND_NUCLEIC_ACID_METABOLIC_PROCESS	2.01	0.025
NEGATIVE_REGULATION_OF_TRANSCRIPTION	1.88	0.084
NEGATIVE_REGULATION_OF_METABOLIC_PROCESS	1.87	0.074
NEGATIVE_REGULATION_OF_RNA_METABOLIC_PROCESS	1.85	0.072
NEGATIVE_REGULATION_OF_CELLULAR_METABOLIC_PROCESS	1.85	0.062
NEGATIVE_REGULATION_OF_TRANSCRIPTION_DNA_DEPENDENT	1.82	0.07
DNA_PACKAGING	1.82	0.062
MRNA_PROCESSING_GO_0006397	1.82	0.055
RNA_PROCESSING	1.78	0.077
RNA_CATABOLIC_PROCESS	1.75	0.088
DOWN
Function	Normalized enrichment score (NES)	FDR q-value
GObp
NITROGEN_COMPOUND_CATABOLIC_PROCESS	-2.03	0.018
AMINO_ACID_CATABOLIC_PROCESS	-1.91	0.046
ORGANIC_ACID_METABOLIC_PROCESS	-1.9	0.034
STEROID_METABOLIC_PROCESS	-1.9	0.026
AMINE_CATABOLIC_PROCESS	-1.89	0.026
CARBOXYLIC_ACID_METABOLIC_PROCESS	-1.87	0.027
GOcc
MITOCHONDRIAL_MATRIX	-2.06	0.007
MITOCHONDRIAL_LUMEN	-2.01	0.005
MITOCHONDRIAL_MEMBRANE_PART	-1.96	0.008
MITOCHONDRIAL_PART	-1.96	0.006
ORGANELLAR_RIBOSOME	-1.9	0.01
MITOCHONDRIAL_INNER_MEMBRANE	-1.9	0.008
MITOCHONDRIAL_RIBOSOME	-1.88	0.009
MITOCHONDRIAL_RESPIRATORY_CHAIN	-1.82	0.016
MITOCHONDRION	-1.76	0.025
ORGANELLE_INNER_MEMBRANE	-1.74	0.025
EXTRACELLULAR_REGION	-1.72	0.029
RIBOSOMAL_SUBUNIT	-1.7	0.032
MITOCHONDRIAL_MEMBRANE	-1.58	0.074
MICROBODY	-1.56	0.089
MITOCHONDRIAL_ENVELOPE	-1.54	0.095
GOmf
OXIDOREDUCTASE_ACTIVITY_ACTING_ON_THE_ALDEHYDE_OR_OXO_GROUP_OF_DONORS	-1.91	0.065
STRUCTURAL_CONSTITUENT_OF_RIBOSOME	-1.9	0.036
OXIDOREDUCTASE_ACTIVITY_ACTING_ON_NADH_OR_NADPH	-1.83	0.056
STRUCTURAL_MOLECULE_ACTIVITY	-1.82	0.043
OXIDOREDUCTASE_ACTIVITY	-1.78	0.054
OXIDOREDUCTASE_ACTIVITY_GO_0016616	-1.73	0.08
AMINE_TRANSMEMBRANE_TRANSPORTER_ACTIVITY	-1.71	0.078
PROTEASE_INHIBITOR_ACTIVITY	-1.69	0.079
TRANSFERASE_ACTIVITY_TRANSFERRING_SULFUR_CONTAINING_GROUPS	-1.69	0.072
ELECTRON_CARRIER_ACTIVITY	-1.69	0.069
AMINO_ACID_TRANSMEMBRANE_TRANSPORTER_ACTIVITY	-1.68	0.068
OXIDOREDUCTASE_ACTIVITY_ACTING_ON_CH_OH_GROUP_OF_DONORS	-1.67	0.065
CARBOXYLIC_ACID_TRANSMEMBRANE_TRANSPORTER_ACTIVITY	-1.65	0.072
ORGANIC_ACID_TRANSMEMBRANE_TRANSPORTER_ACTIVITY	-1.64	0.07
HYDROLASE_ACTIVITY_ACTING_ON_GLYCOSYL_BONDS	-1.62	0.077
COFACTOR_BINDING	-1.62	0.073
ZINC_ION_BINDING	-1.59	0.089
KEGG
KEGG_OXIDATIVE_PHOSPHORYLATION	-2.21	<0,001
KEGG_PYRUVATE_METABOLISM	-2.15	<0,001
KEGG_GLYCOLYSIS_GLUCONEOGENESIS	-2.15	<0,001
KEGG_DRUG_METABOLISM_CYTOCHROME_P450	-2.13	<0,001
KEGG_GLUTATHIONE_METABOLISM	-2.06	0.001
KEGG_PARKINSONS_DISEASE	-2.04	0.001
KEGG_RIBOSOME	-2.03	0.001
KEGG_PROPANOATE_METABOLISM	-2	0.002
KEGG_TYROSINE_METABOLISM	-1.97	0.002
KEGG_HISTIDINE_METABOLISM	-1.9	0.005
KEGG_LYSOSOME	-1.84	0.008
KEGG_ALZHEIMERS_DISEASE	-1.81	0.012
KEGG_VALINE_LEUCINE_AND_ISOLEUCINE_DEGRADATION	-1.75	0.019
KEGG_SYSTEMIC_LUPUS_ERYTHEMATOSUS	-1.73	0.023
KEGG_BETA_ALANINE_METABOLISM	-1.71	0.027
KEGG_BUTANOATE_METABOLISM	-1.7	0.031
KEGG_TRYPTOPHAN_METABOLISM	-1.69	0.031
KEGG_STARCH_AND_SUCROSE_METABOLISM	-1.65	0.042
KEGG_HEMATOPOIETIC_CELL_LINEAGE	-1.63	0.046
KEGG_PPAR_SIGNALING_PATHWAY	-1.63	0.044
KEGG_GALACTOSE_METABOLISM	-1.62	0.045
KEGG_CARDIAC_MUSCLE_CONTRACTION	-1.56	0.072
KEGG_PENTOSE_PHOSPHATE_PATHWAY	-1.55	0.077
KEGG_PEROXISOME	-1.54	0.079
KEGG_HUNTINGTONS_DISEASE	-1.5	0.099
KEGG_FATTY_ACID_METABOLISM	-1.5	0.097

## Sheet: CON SI_GF SI overlap
Functional annotation and enrichment analysis using DAVID v6.7 (http://david.abcc.ncifcrf.gov/)
shown are only results with a false discovery rate (FDR) <25%; values with FDR<10% were considered significant; enriched terms with 10%>FDR<25% are shown in grey
FDR/100 is called p-adjusted (padj) in manuscript and figures
For the combined lists, only biological processes and pathways are reported
UP
Category	Term	Count	un-adjusted p-value	Genes	Fold Enrichment	FDR [%]	-log10 (FDR/100)
GOTERM_BP_5	GO:0006457~protein folding	13	7.62274e-07	ENSMUSG00000021037, ENSMUSG00000003226, ENSMUSG00000026740, ENSMUSG00000028035, ENSMUSG00000030357, ENSMUSG00000057069, ENSMUSG00000036052, ENSMUSG00000015656, ENSMUSG00000003814, ENSMUSG00000024222, ENSMUSG00000029657, ENSMUSG00000004460, ENSMUSG00000005483	6.44199	0.00114096	4.94273
GOTERM_BP_5	GO:0031326~regulation of cellular biosynthetic process	68	1.59599e-06	ENSMUSG00000055044, ENSMUSG00000071341, ENSMUSG00000049327, ENSMUSG00000018476, ENSMUSG00000028341, ENSMUSG00000039987, ENSMUSG00000029135, ENSMUSG00000037235, ENSMUSG00000028842, ENSMUSG00000038418, ENSMUSG00000021457, ENSMUSG00000024528, ENSMUSG00000037868, ENSMUSG00000039804, ENSMUSG00000032402, ENSMUSG00000025408, ENSMUSG00000031609, ENSMUSG00000047904, ENSMUSG00000020038, ENSMUSG00000041324,…	1.73468	0.00238883	4.62181
GOTERM_BP_5	GO:0010556~regulation of macromolecule biosynthetic process	66	2.08499e-06	ENSMUSG00000055044, ENSMUSG00000071341, ENSMUSG00000049327, ENSMUSG00000018476, ENSMUSG00000028341, ENSMUSG00000039987, ENSMUSG00000029135, ENSMUSG00000037235, ENSMUSG00000028842, ENSMUSG00000038418, ENSMUSG00000021457, ENSMUSG00000024528, ENSMUSG00000037868, ENSMUSG00000039804, ENSMUSG00000032402, ENSMUSG00000025408, ENSMUSG00000031609, ENSMUSG00000020038, ENSMUSG00000041324, ENSMUSG00000060477,…	1.74448	0.00312075	4.50574
GOTERM_BP_5	GO:0044267~cellular protein metabolic process	60	2.57609e-06	ENSMUSG00000021037, ENSMUSG00000003226, ENSMUSG00000020032, ENSMUSG00000039701, ENSMUSG00000030357, ENSMUSG00000018476, ENSMUSG00000015656, ENSMUSG00000021457, ENSMUSG00000032905, ENSMUSG00000039804, ENSMUSG00000024014, ENSMUSG00000031608, ENSMUSG00000020038, ENSMUSG00000030062, ENSMUSG00000038145, ENSMUSG00000022601, ENSMUSG00000024222, ENSMUSG00000060477, ENSMUSG00000025290, ENSMUSG00000027540,…	1.80843	0.00385581	4.41388
GOTERM_BP_5	GO:0010468~regulation of gene expression	65	8.83667e-06	ENSMUSG00000055044, ENSMUSG00000071341, ENSMUSG00000049327, ENSMUSG00000018476, ENSMUSG00000028341, ENSMUSG00000039987, ENSMUSG00000029135, ENSMUSG00000037235, ENSMUSG00000028842, ENSMUSG00000038418, ENSMUSG00000024528, ENSMUSG00000037868, ENSMUSG00000039804, ENSMUSG00000032402, ENSMUSG00000025408, ENSMUSG00000031609, ENSMUSG00000020038, ENSMUSG00000041324, ENSMUSG00000060477, ENSMUSG00000025316,…	1.68409	0.0132258	3.87858
GOTERM_BP_5	GO:0045449~regulation of transcription	60	2.00892e-05	ENSMUSG00000055044, ENSMUSG00000071341, ENSMUSG00000049327, ENSMUSG00000018476, ENSMUSG00000028341, ENSMUSG00000039987, ENSMUSG00000029135, ENSMUSG00000037235, ENSMUSG00000038418, ENSMUSG00000024528, ENSMUSG00000037868, ENSMUSG00000039804, ENSMUSG00000032402, ENSMUSG00000025408, ENSMUSG00000031609, ENSMUSG00000020038, ENSMUSG00000041324, ENSMUSG00000060477, ENSMUSG00000025316, ENSMUSG00000056962,…	1.69555	0.0300651	3.52194
GOTERM_BP_5	GO:0010558~negative regulation of macromolecule biosynthetic process	20	3.48382e-05	ENSMUSG00000040363, ENSMUSG00000042500, ENSMUSG00000018476, ENSMUSG00000027660, ENSMUSG00000036052, ENSMUSG00000027680, ENSMUSG00000035877, ENSMUSG00000037235, ENSMUSG00000030103, ENSMUSG00000028842, ENSMUSG00000038418, ENSMUSG00000034271, ENSMUSG00000003382, ENSMUSG00000066687, ENSMUSG00000020893, ENSMUSG00000055866, ENSMUSG00000032402, ENSMUSG00000051495, ENSMUSG00000031609, ENSMUSG00000074102	3.01116	0.0521329	3.28289
GOTERM_BP_5	GO:0031327~negative regulation of cellular biosynthetic process	20	5.11247e-05	ENSMUSG00000040363, ENSMUSG00000042500, ENSMUSG00000018476, ENSMUSG00000027660, ENSMUSG00000036052, ENSMUSG00000027680, ENSMUSG00000035877, ENSMUSG00000037235, ENSMUSG00000030103, ENSMUSG00000028842, ENSMUSG00000038418, ENSMUSG00000034271, ENSMUSG00000003382, ENSMUSG00000066687, ENSMUSG00000020893, ENSMUSG00000055866, ENSMUSG00000032402, ENSMUSG00000051495, ENSMUSG00000031609, ENSMUSG00000074102	2.92713	0.0764957	3.11636
GOTERM_BP_5	GO:0019219~regulation of nucleobase, nucleoside, nucleotide and nucleic acid metabolic process	61	5.32939e-05	ENSMUSG00000055044, ENSMUSG00000071341, ENSMUSG00000049327, ENSMUSG00000018476, ENSMUSG00000028341, ENSMUSG00000039987, ENSMUSG00000029135, ENSMUSG00000037235, ENSMUSG00000038418, ENSMUSG00000024528, ENSMUSG00000037868, ENSMUSG00000039804, ENSMUSG00000032402, ENSMUSG00000025408, ENSMUSG00000031609, ENSMUSG00000047904, ENSMUSG00000020038, ENSMUSG00000041324, ENSMUSG00000060477, ENSMUSG00000025316,…	1.63151	0.0797402	3.09832
GOTERM_BP_5	GO:0009890~negative regulation of biosynthetic process	20	5.78953e-05	ENSMUSG00000040363, ENSMUSG00000042500, ENSMUSG00000018476, ENSMUSG00000027660, ENSMUSG00000036052, ENSMUSG00000027680, ENSMUSG00000035877, ENSMUSG00000037235, ENSMUSG00000030103, ENSMUSG00000028842, ENSMUSG00000038418, ENSMUSG00000034271, ENSMUSG00000003382, ENSMUSG00000066687, ENSMUSG00000020893, ENSMUSG00000055866, ENSMUSG00000032402, ENSMUSG00000051495, ENSMUSG00000031609, ENSMUSG00000074102	2.90015	0.0866221	3.06237
GOTERM_BP_5	GO:0010629~negative regulation of gene expression	19	8.81239e-05	ENSMUSG00000040363, ENSMUSG00000042500, ENSMUSG00000018476, ENSMUSG00000027660, ENSMUSG00000036052, ENSMUSG00000035877, ENSMUSG00000037235, ENSMUSG00000030103, ENSMUSG00000028842, ENSMUSG00000038418, ENSMUSG00000034271, ENSMUSG00000003382, ENSMUSG00000066687, ENSMUSG00000020893, ENSMUSG00000055866, ENSMUSG00000032402, ENSMUSG00000051495, ENSMUSG00000031609, ENSMUSG00000074102	2.91642	0.131822	2.88001
GOTERM_BP_5	GO:0006464~protein modification process	38	0.000145967	ENSMUSG00000024242, ENSMUSG00000037112, ENSMUSG00000020032, ENSMUSG00000050271, ENSMUSG00000018476, ENSMUSG00000038485, ENSMUSG00000021457, ENSMUSG00000024014, ENSMUSG00000057069, ENSMUSG00000031608, ENSMUSG00000019907, ENSMUSG00000020038, ENSMUSG00000030062, ENSMUSG00000038145, ENSMUSG00000042608, ENSMUSG00000060477, ENSMUSG00000037926, ENSMUSG00000018906, ENSMUSG00000042978, ENSMUSG00000027540,…	1.89799	0.218259	2.66103
GOTERM_BP_5	GO:0031324~negative regulation of cellular metabolic process	20	0.00027319	ENSMUSG00000040363, ENSMUSG00000042500, ENSMUSG00000018476, ENSMUSG00000027660, ENSMUSG00000036052, ENSMUSG00000027680, ENSMUSG00000035877, ENSMUSG00000037235, ENSMUSG00000030103, ENSMUSG00000028842, ENSMUSG00000038418, ENSMUSG00000034271, ENSMUSG00000003382, ENSMUSG00000066687, ENSMUSG00000020893, ENSMUSG00000055866, ENSMUSG00000032402, ENSMUSG00000051495, ENSMUSG00000031609, ENSMUSG00000074102	2.57396	0.408129	2.3892
GOTERM_BP_5	GO:0016481~negative regulation of transcription	17	0.000276442	ENSMUSG00000040363, ENSMUSG00000018476, ENSMUSG00000027660, ENSMUSG00000036052, ENSMUSG00000035877, ENSMUSG00000037235, ENSMUSG00000030103, ENSMUSG00000034271, ENSMUSG00000038418, ENSMUSG00000003382, ENSMUSG00000066687, ENSMUSG00000020893, ENSMUSG00000055866, ENSMUSG00000032402, ENSMUSG00000051495, ENSMUSG00000031609, ENSMUSG00000074102	2.87599	0.412978	2.38407
GOTERM_BP_5	GO:0016071~mRNA metabolic process	15	0.000315827	ENSMUSG00000029817, ENSMUSG00000042772, ENSMUSG00000029169, ENSMUSG00000056962, ENSMUSG00000042500, ENSMUSG00000022160, ENSMUSG00000028842, ENSMUSG00000039449, ENSMUSG00000024097, ENSMUSG00000004460, ENSMUSG00000071172, ENSMUSG00000074102, ENSMUSG00000021431, ENSMUSG00000038611, ENSMUSG00000021111	3.12583	0.471686	2.32635
GOTERM_BP_5	GO:0045892~negative regulation of transcription, DNA-dependent	15	0.000385786	ENSMUSG00000020893, ENSMUSG00000066687, ENSMUSG00000055866, ENSMUSG00000040363, ENSMUSG00000051495, ENSMUSG00000032402, ENSMUSG00000031609, ENSMUSG00000018476, ENSMUSG00000036052, ENSMUSG00000027660, ENSMUSG00000035877, ENSMUSG00000030103, ENSMUSG00000034271, ENSMUSG00000038418, ENSMUSG00000003382	3.06494	0.575888	2.23966
GOTERM_BP_5	GO:0051253~negative regulation of RNA metabolic process	15	0.000409444	ENSMUSG00000020893, ENSMUSG00000066687, ENSMUSG00000055866, ENSMUSG00000040363, ENSMUSG00000051495, ENSMUSG00000032402, ENSMUSG00000031609, ENSMUSG00000018476, ENSMUSG00000036052, ENSMUSG00000027660, ENSMUSG00000035877, ENSMUSG00000030103, ENSMUSG00000034271, ENSMUSG00000038418, ENSMUSG00000003382	3.04516	0.611103	2.21389
GOTERM_BP_5	GO:0010605~negative regulation of macromolecule metabolic process	20	0.000418313	ENSMUSG00000040363, ENSMUSG00000042500, ENSMUSG00000018476, ENSMUSG00000027660, ENSMUSG00000036052, ENSMUSG00000027680, ENSMUSG00000035877, ENSMUSG00000037235, ENSMUSG00000030103, ENSMUSG00000028842, ENSMUSG00000038418, ENSMUSG00000034271, ENSMUSG00000003382, ENSMUSG00000066687, ENSMUSG00000020893, ENSMUSG00000055866, ENSMUSG00000032402, ENSMUSG00000051495, ENSMUSG00000031609, ENSMUSG00000074102	2.48748	0.624302	2.20461
GOTERM_BP_5	GO:0045934~negative regulation of nucleobase, nucleoside, nucleotide and nucleic acid metabolic process	17	0.000565793	ENSMUSG00000040363, ENSMUSG00000018476, ENSMUSG00000027660, ENSMUSG00000036052, ENSMUSG00000035877, ENSMUSG00000037235, ENSMUSG00000030103, ENSMUSG00000034271, ENSMUSG00000038418, ENSMUSG00000003382, ENSMUSG00000066687, ENSMUSG00000020893, ENSMUSG00000055866, ENSMUSG00000032402, ENSMUSG00000051495, ENSMUSG00000031609, ENSMUSG00000074102	2.69488	0.843536	2.0739
GOTERM_BP_5	GO:0051172~negative regulation of nitrogen compound metabolic process	17	0.00063048	ENSMUSG00000040363, ENSMUSG00000018476, ENSMUSG00000027660, ENSMUSG00000036052, ENSMUSG00000035877, ENSMUSG00000037235, ENSMUSG00000030103, ENSMUSG00000034271, ENSMUSG00000038418, ENSMUSG00000003382, ENSMUSG00000066687, ENSMUSG00000020893, ENSMUSG00000055866, ENSMUSG00000032402, ENSMUSG00000051495, ENSMUSG00000031609, ENSMUSG00000074102	2.668	0.939554	2.02708
GOTERM_BP_5	GO:0008286~insulin receptor signaling pathway	5	0.000920921	ENSMUSG00000037112, ENSMUSG00000027540, ENSMUSG00000038894, ENSMUSG00000024539, ENSMUSG00000038485	11.2381	1.3696	1.86341
GOTERM_BP_5	GO:0007167~enzyme linked receptor protein signaling pathway	13	0.00133768	ENSMUSG00000021253, ENSMUSG00000037112, ENSMUSG00000027540, ENSMUSG00000032402, ENSMUSG00000038894, ENSMUSG00000024789, ENSMUSG00000020053, ENSMUSG00000024539, ENSMUSG00000027660, ENSMUSG00000038485, ENSMUSG00000021457, ENSMUSG00000028907, ENSMUSG00000000489	2.99683	1.98363	1.70254
GOTERM_BP_5	GO:0016311~dephosphorylation	9	0.00178304	ENSMUSG00000037926, ENSMUSG00000031530, ENSMUSG00000027540, ENSMUSG00000024539, ENSMUSG00000019907, ENSMUSG00000018401, ENSMUSG00000018648, ENSMUSG00000019960, ENSMUSG00000023805	4.01702	2.63586	1.57908
GOTERM_BP_5	GO:0032868~response to insulin stimulus	6	0.0023512	ENSMUSG00000037868, ENSMUSG00000037112, ENSMUSG00000027540, ENSMUSG00000038894, ENSMUSG00000024539, ENSMUSG00000038485	6.4	3.46206	1.46067
GOTERM_BP_5	GO:0051252~regulation of RNA metabolic process	38	0.00327106	ENSMUSG00000002028, ENSMUSG00000040363, ENSMUSG00000027678, ENSMUSG00000051469, ENSMUSG00000018476, ENSMUSG00000020053, ENSMUSG00000036052, ENSMUSG00000028341, ENSMUSG00000029135, ENSMUSG00000035877, ENSMUSG00000038418, ENSMUSG00000003382, ENSMUSG00000037868, ENSMUSG00000032402, ENSMUSG00000025408, ENSMUSG00000031609, ENSMUSG00000063889, ENSMUSG00000056501, ENSMUSG00000041324, ENSMUSG00000003545,…	1.60717	4.78582	1.32004
GOTERM_BP_5	GO:0006929~substrate-bound cell migration	3	0.00357662	ENSMUSG00000023905, ENSMUSG00000055805, ENSMUSG00000000489	31.4667	5.22177	1.28218
GOTERM_BP_5	GO:0016568~chromatin modification	11	0.00432479	ENSMUSG00000025316, ENSMUSG00000002028, ENSMUSG00000053470, ENSMUSG00000039473, ENSMUSG00000040363, ENSMUSG00000056962, ENSMUSG00000056608, ENSMUSG00000049327, ENSMUSG00000018476, ENSMUSG00000035021, ENSMUSG00000037876	2.93333	6.28139	1.20194
GOTERM_BP_5	GO:0006355~regulation of transcription, DNA-dependent	37	0.00453794	ENSMUSG00000002028, ENSMUSG00000040363, ENSMUSG00000027678, ENSMUSG00000051469, ENSMUSG00000018476, ENSMUSG00000020053, ENSMUSG00000036052, ENSMUSG00000028341, ENSMUSG00000029135, ENSMUSG00000035877, ENSMUSG00000038418, ENSMUSG00000003382, ENSMUSG00000037868, ENSMUSG00000032402, ENSMUSG00000025408, ENSMUSG00000031609, ENSMUSG00000063889, ENSMUSG00000056501, ENSMUSG00000041324, ENSMUSG00000003545,…	1.58944	6.58124	1.18169
GOTERM_BP_5	GO:0032869~cellular response to insulin stimulus	5	0.00461685	ENSMUSG00000037112, ENSMUSG00000027540, ENSMUSG00000038894, ENSMUSG00000024539, ENSMUSG00000038485	7.31783	6.69203	1.17444
GOTERM_BP_5	GO:0006983~ER overload response	3	0.00653856	ENSMUSG00000025408, ENSMUSG00000046062, ENSMUSG00000026864	23.6	9.35234	1.02908
GOTERM_BP_5	GO:0016070~RNA metabolic process	20	0.00864716	ENSMUSG00000029817, ENSMUSG00000042772, ENSMUSG00000038279, ENSMUSG00000029169, ENSMUSG00000056962, ENSMUSG00000042500, ENSMUSG00000022160, ENSMUSG00000028842, ENSMUSG00000028907, ENSMUSG00000039449, ENSMUSG00000026127, ENSMUSG00000024097, ENSMUSG00000004460, ENSMUSG00000025408, ENSMUSG00000032402, ENSMUSG00000071172, ENSMUSG00000074102, ENSMUSG00000021431, ENSMUSG00000038611, ENSMUSG00000021111	1.90131	12.1898
GOTERM_BP_5	GO:0017015~regulation of transforming growth factor beta receptor signaling pathway	4	0.011539	ENSMUSG00000021253, ENSMUSG00000032402, ENSMUSG00000027660, ENSMUSG00000026864	8.39111	15.9467
GOTERM_BP_5	GO:0048732~gland development	9	0.0130377	ENSMUSG00000021253, ENSMUSG00000027678, ENSMUSG00000032402, ENSMUSG00000038894, ENSMUSG00000030357, ENSMUSG00000020053, ENSMUSG00000020484, ENSMUSG00000056501, ENSMUSG00000000489	2.87513	17.8341
GOTERM_BP_5	GO:0031328~positive regulation of cellular biosynthetic process	17	0.0142251	ENSMUSG00000002028, ENSMUSG00000020053, ENSMUSG00000028341, ENSMUSG00000028890, ENSMUSG00000013089, ENSMUSG00000053004, ENSMUSG00000021457, ENSMUSG00000038418, ENSMUSG00000015605, ENSMUSG00000026491, ENSMUSG00000021253, ENSMUSG00000037868, ENSMUSG00000025408, ENSMUSG00000032402, ENSMUSG00000028634, ENSMUSG00000056501, ENSMUSG00000041324	1.93816	19.3015
GOTERM_BP_5	GO:0009891~positive regulation of biosynthetic process	17	0.0153727	ENSMUSG00000002028, ENSMUSG00000020053, ENSMUSG00000028341, ENSMUSG00000028890, ENSMUSG00000013089, ENSMUSG00000053004, ENSMUSG00000021457, ENSMUSG00000038418, ENSMUSG00000015605, ENSMUSG00000026491, ENSMUSG00000021253, ENSMUSG00000037868, ENSMUSG00000025408, ENSMUSG00000032402, ENSMUSG00000028634, ENSMUSG00000056501, ENSMUSG00000041324	1.92077	20.6962
GOTERM_BP_5	GO:0045454~cell redox homeostasis	5	0.016561	ENSMUSG00000058709, ENSMUSG00000025408, ENSMUSG00000020571, ENSMUSG00000025823, ENSMUSG00000031068	5.07527	22.1167
GOTERM_BP_5	GO:0045941~positive regulation of transcription	15	0.0186545	ENSMUSG00000002028, ENSMUSG00000020053, ENSMUSG00000028341, ENSMUSG00000028890, ENSMUSG00000013089, ENSMUSG00000038418, ENSMUSG00000015605, ENSMUSG00000026491, ENSMUSG00000021253, ENSMUSG00000037868, ENSMUSG00000032402, ENSMUSG00000025408, ENSMUSG00000028634, ENSMUSG00000056501, ENSMUSG00000041324	1.98737	24.5618
GOTERM_CC_5	GO:0005634~nucleus	116	5.49555e-13	ENSMUSG00000029817, ENSMUSG00000055044, ENSMUSG00000071341, ENSMUSG00000024966, ENSMUSG00000001089, ENSMUSG00000027193, ENSMUSG00000020076, ENSMUSG00000038418, ENSMUSG00000028907, ENSMUSG00000026127, ENSMUSG00000037868, ENSMUSG00000025408, ENSMUSG00000031060, ENSMUSG00000038611, ENSMUSG00000025316, ENSMUSG00000029169, ENSMUSG00000020484, ENSMUSG00000013089, ENSMUSG00000018648, ENSMUSG00000037876,…	1.78165	6.73084e-10	11.1719
GOTERM_CC_5	GO:0043231~intracellular membrane-bounded organelle	153	1.30396e-09	ENSMUSG00000029817, ENSMUSG00000055044, ENSMUSG00000071341, ENSMUSG00000024966, ENSMUSG00000001089, ENSMUSG00000015656, ENSMUSG00000025823, ENSMUSG00000020076, ENSMUSG00000027193, ENSMUSG00000038418, ENSMUSG00000028907, ENSMUSG00000026127, ENSMUSG00000056429, ENSMUSG00000037868, ENSMUSG00000031060, ENSMUSG00000025408, ENSMUSG00000030082, ENSMUSG00000020571, ENSMUSG00000030062, ENSMUSG00000038611,…	1.39765	1.59705e-06	7.79668
GOTERM_CC_5	GO:0043229~intracellular organelle	163	1.53732e-08	ENSMUSG00000029817, ENSMUSG00000055044, ENSMUSG00000071341, ENSMUSG00000024966, ENSMUSG00000015656, ENSMUSG00000001089, ENSMUSG00000025823, ENSMUSG00000020076, ENSMUSG00000027193, ENSMUSG00000038418, ENSMUSG00000028907, ENSMUSG00000026127, ENSMUSG00000056429, ENSMUSG00000037868, ENSMUSG00000031060, ENSMUSG00000025408, ENSMUSG00000030082, ENSMUSG00000020571, ENSMUSG00000030062, ENSMUSG00000038611,…	1.31966	1.88287e-05	6.72518
GOTERM_CC_5	GO:0005788~endoplasmic reticulum lumen	11	1.12679e-07	ENSMUSG00000018906, ENSMUSG00000026740, ENSMUSG00000048482, ENSMUSG00000020571, ENSMUSG00000019916, ENSMUSG00000003814, ENSMUSG00000025823, ENSMUSG00000022769, ENSMUSG00000032115, ENSMUSG00000004460, ENSMUSG00000026864	10.1253	0.000138005	5.8601
GOTERM_CC_5	GO:0044432~endoplasmic reticulum part	15	1.04475e-05	ENSMUSG00000018906, ENSMUSG00000048482, ENSMUSG00000022136, ENSMUSG00000025823, ENSMUSG00000003814, ENSMUSG00000041220, ENSMUSG00000004460, ENSMUSG00000026864, ENSMUSG00000026740, ENSMUSG00000057069, ENSMUSG00000020571, ENSMUSG00000019916, ENSMUSG00000030062, ENSMUSG00000022769, ENSMUSG00000032115	4.30353	0.0127951	3.89296
GOTERM_CC_5	GO:0005737~cytoplasm	127	4.51772e-05	ENSMUSG00000031442, ENSMUSG00000055044, ENSMUSG00000038619, ENSMUSG00000024966, ENSMUSG00000015656, ENSMUSG00000025823, ENSMUSG00000027193, ENSMUSG00000021457, ENSMUSG00000028842, ENSMUSG00000000489, ENSMUSG00000028907, ENSMUSG00000032905, ENSMUSG00000056429, ENSMUSG00000025408, ENSMUSG00000030082, ENSMUSG00000020571, ENSMUSG00000030062, ENSMUSG00000031068, ENSMUSG00000025290, ENSMUSG00000024789,…	1.30131	0.0553178	3.25714
GOTERM_CC_5	GO:0005783~endoplasmic reticulum	28	0.000145626	ENSMUSG00000021037, ENSMUSG00000020869, ENSMUSG00000048482, ENSMUSG00000003814, ENSMUSG00000025823, ENSMUSG00000041220, ENSMUSG00000026864, ENSMUSG00000030082, ENSMUSG00000027944, ENSMUSG00000057069, ENSMUSG00000020571, ENSMUSG00000030062, ENSMUSG00000022769, ENSMUSG00000032115, ENSMUSG00000018906, ENSMUSG00000022538, ENSMUSG00000027540, ENSMUSG00000040451, ENSMUSG00000022136, ENSMUSG00000048578,…	2.21442	0.178212	2.74906
GOTERM_CC_5	GO:0070013~intracellular organelle lumen	34	0.000174205	ENSMUSG00000002028, ENSMUSG00000062075, ENSMUSG00000055044, ENSMUSG00000048482, ENSMUSG00000035621, ENSMUSG00000003814, ENSMUSG00000022160, ENSMUSG00000025823, ENSMUSG00000020076, ENSMUSG00000028907, ENSMUSG00000039449, ENSMUSG00000026127, ENSMUSG00000003382, ENSMUSG00000026864, ENSMUSG00000032402, ENSMUSG00000031609, ENSMUSG00000020571, ENSMUSG00000063889, ENSMUSG00000022185, ENSMUSG00000022769,…	1.98882	0.213153	2.67131
GOTERM_CC_5	GO:0044428~nuclear part	32	0.00337324	ENSMUSG00000002028, ENSMUSG00000003226, ENSMUSG00000062075, ENSMUSG00000055044, ENSMUSG00000035621, ENSMUSG00000027193, ENSMUSG00000020076, ENSMUSG00000022160, ENSMUSG00000028907, ENSMUSG00000039449, ENSMUSG00000026127, ENSMUSG00000003382, ENSMUSG00000032402, ENSMUSG00000031060, ENSMUSG00000031609, ENSMUSG00000027944, ENSMUSG00000063889, ENSMUSG00000022185, ENSMUSG00000035021, ENSMUSG00000021431,…	1.70893	4.05397	1.39212
GOTERM_CC_5	GO:0005635~nuclear envelope	8	0.00836342	ENSMUSG00000003226, ENSMUSG00000062075, ENSMUSG00000026021, ENSMUSG00000027944, ENSMUSG00000026353, ENSMUSG00000063895, ENSMUSG00000026491, ENSMUSG00000000531	3.46533	9.775	1.00988
GOTERM_CC_5	GO:0044446~intracellular organelle part	63	0.0144886	ENSMUSG00000003226, ENSMUSG00000055044, ENSMUSG00000048482, ENSMUSG00000007617, ENSMUSG00000022160, ENSMUSG00000027193, ENSMUSG00000020076, ENSMUSG00000025823, ENSMUSG00000028907, ENSMUSG00000026127, ENSMUSG00000041220, ENSMUSG00000056429, ENSMUSG00000031060, ENSMUSG00000032402, ENSMUSG00000031609, ENSMUSG00000020571, ENSMUSG00000022602, ENSMUSG00000030062, ENSMUSG00000022601, ENSMUSG00000032115,…	1.30723	16.3686
GOTERM_MF_5	GO:0032559~adenyl ribonucleotide binding	38	0.000269151	ENSMUSG00000027722, ENSMUSG00000024242, ENSMUSG00000037112, ENSMUSG00000020032, ENSMUSG00000060671, ENSMUSG00000030357, ENSMUSG00000055065, ENSMUSG00000050271, ENSMUSG00000040565, ENSMUSG00000015656, ENSMUSG00000033658, ENSMUSG00000053907, ENSMUSG00000020076, ENSMUSG00000021457, ENSMUSG00000026864, ENSMUSG00000039804, ENSMUSG00000024014, ENSMUSG00000056608, ENSMUSG00000038145, ENSMUSG00000042608,…	1.80988	0.282115	2.54957
GOTERM_MF_5	GO:0016791~phosphatase activity	12	0.000597337	ENSMUSG00000027088, ENSMUSG00000037926, ENSMUSG00000031530, ENSMUSG00000026617, ENSMUSG00000027540, ENSMUSG00000024539, ENSMUSG00000046062, ENSMUSG00000019907, ENSMUSG00000018401, ENSMUSG00000018648, ENSMUSG00000019960, ENSMUSG00000023805	3.50609	0.625133	2.20403
GOTERM_MF_5	GO:0004672~protein kinase activity	17	0.00895798	ENSMUSG00000042978, ENSMUSG00000037112, ENSMUSG00000024242, ENSMUSG00000020032, ENSMUSG00000024789, ENSMUSG00000050271, ENSMUSG00000021457, ENSMUSG00000051590, ENSMUSG00000020601, ENSMUSG00000024014, ENSMUSG00000020272, ENSMUSG00000024042, ENSMUSG00000014361, ENSMUSG00000041297, ENSMUSG00000038145, ENSMUSG00000042608, ENSMUSG00000060477	2.02768	9.01159	1.0452
GOTERM_MF_5	GO:0046914~transition metal ion binding	51	0.0111469	ENSMUSG00000003226, ENSMUSG00000055044, ENSMUSG00000071341, ENSMUSG00000018476, ENSMUSG00000038866, ENSMUSG00000028341, ENSMUSG00000053907, ENSMUSG00000038418, ENSMUSG00000039671, ENSMUSG00000001774, ENSMUSG00000039789, ENSMUSG00000037868, ENSMUSG00000042599, ENSMUSG00000031060, ENSMUSG00000041229, ENSMUSG00000018572, ENSMUSG00000024014, ENSMUSG00000031608, ENSMUSG00000023067, ENSMUSG00000038611,…	1.35982	11.0987
PANTHER_BP_ALL	BP00062:Protein folding	16	4.37515e-09	ENSMUSG00000021037, ENSMUSG00000028035, ENSMUSG00000030357, ENSMUSG00000005936, ENSMUSG00000036052, ENSMUSG00000015656, ENSMUSG00000003814, ENSMUSG00000004460, ENSMUSG00000005483, ENSMUSG00000026864, ENSMUSG00000022403, ENSMUSG00000026740, ENSMUSG00000024780, ENSMUSG00000057069, ENSMUSG00000024222, ENSMUSG00000029657	7.34879	5.06671e-06	7.29527
PANTHER_BP_ALL	BP00063:Protein modification	35	4.91287e-05	ENSMUSG00000024242, ENSMUSG00000037112, ENSMUSG00000020032, ENSMUSG00000025823, ENSMUSG00000021457, ENSMUSG00000031608, ENSMUSG00000020571, ENSMUSG00000019907, ENSMUSG00000030062, ENSMUSG00000038145, ENSMUSG00000042608, ENSMUSG00000022769, ENSMUSG00000060477, ENSMUSG00000037926, ENSMUSG00000018906, ENSMUSG00000042978, ENSMUSG00000027540, ENSMUSG00000024789, ENSMUSG00000042719, ENSMUSG00000025234,…	2.0925	0.0568794	3.24504
PANTHER_BP_ALL	BP00060:Protein metabolism and modification	65	0.000330644	ENSMUSG00000021037, ENSMUSG00000039701, ENSMUSG00000020032, ENSMUSG00000030357, ENSMUSG00000015656, ENSMUSG00000025823, ENSMUSG00000028842, ENSMUSG00000021457, ENSMUSG00000042599, ENSMUSG00000041229, ENSMUSG00000020571, ENSMUSG00000031608, ENSMUSG00000030062, ENSMUSG00000038145, ENSMUSG00000022601, ENSMUSG00000024222, ENSMUSG00000025290, ENSMUSG00000060477, ENSMUSG00000027540, ENSMUSG00000024789,…	1.50955	0.382239	2.41767
PANTHER_BP_ALL	BP00031:Nucleoside, nucleotide and nucleic acid metabolism	67	0.000506889	ENSMUSG00000029817, ENSMUSG00000071341, ENSMUSG00000049327, ENSMUSG00000018476, ENSMUSG00000028341, ENSMUSG00000039987, ENSMUSG00000029135, ENSMUSG00000037235, ENSMUSG00000022160, ENSMUSG00000020076, ENSMUSG00000038418, ENSMUSG00000028907, ENSMUSG00000039671, ENSMUSG00000026127, ENSMUSG00000024528, ENSMUSG00000037868, ENSMUSG00000031822, ENSMUSG00000031060, ENSMUSG00000039804, ENSMUSG00000032402,…	1.47344	0.585439	2.23252
PANTHER_BP_ALL	BP00064:Protein phosphorylation	21	0.00159133	ENSMUSG00000037926, ENSMUSG00000042978, ENSMUSG00000037112, ENSMUSG00000024242, ENSMUSG00000020032, ENSMUSG00000027540, ENSMUSG00000024789, ENSMUSG00000021457, ENSMUSG00000031530, ENSMUSG00000051590, ENSMUSG00000020601, ENSMUSG00000020272, ENSMUSG00000024539, ENSMUSG00000024042, ENSMUSG00000014361, ENSMUSG00000019907, ENSMUSG00000041297, ENSMUSG00000038145, ENSMUSG00000019960, ENSMUSG00000042608,…	2.17276	1.82743	1.73816
PANTHER_BP_ALL	BP00044:mRNA transcription regulation	35	0.00167142	ENSMUSG00000027678, ENSMUSG00000071341, ENSMUSG00000051469, ENSMUSG00000040565, ENSMUSG00000018476, ENSMUSG00000028341, ENSMUSG00000039987, ENSMUSG00000029135, ENSMUSG00000037235, ENSMUSG00000038418, ENSMUSG00000039671, ENSMUSG00000024081, ENSMUSG00000037868, ENSMUSG00000024528, ENSMUSG00000032402, ENSMUSG00000056608, ENSMUSG00000031609, ENSMUSG00000063889, ENSMUSG00000056501, ENSMUSG00000003545,…	1.72779	1.91859	1.71702
PANTHER_BP_ALL	BP00178:Stress response	10	0.00249293	ENSMUSG00000021037, ENSMUSG00000024966, ENSMUSG00000028341, ENSMUSG00000015656, ENSMUSG00000031068, ENSMUSG00000056501, ENSMUSG00000053004, ENSMUSG00000059991, ENSMUSG00000032115, ENSMUSG00000026864	3.45057	2.8492	1.54528
[truncated: 26 more rows]

## Sheet: CON SI NOT GF SI
Functional annotation and enrichment analysis using DAVID v6.7 (http://david.abcc.ncifcrf.gov/)
[truncated: 69 more rows]

[truncated: 6 more sheets: GF SI NOT CON SI, CON-GF, CON-GF (GSEA), CON-exGF, CON-exGF (GSEA), GF-exGF]
