# Supplementary material for: Social interaction-induced activation of RNA splicing in the amygdala of microbiome-deficient mice
Source: eLife. 2018 May 29;7:e33070. doi: 10.7554/eLife.33070 (PMC5995540; doi:10.7554/eLife.33070)
Supplement: Supplementary file 3. [file elife-33070-supp3.xlsx]

## Sheet: GO_bp
Gene ontology term (category "biological process")	CON SI	GF SI	exGF SI
GO:0006464_protein modification process	5.97698	3.65188	2.98362
GO:0044267_cellular protein metabolic process	5.69538	15.2209	7.19187
GO:0031326_regulation of cellular biosynthetic process	3.94498	10.8841	11.5107
GO:0010468_regulation of gene expression	3.60185	12.4987	12.1911
GO:0019219_regulation of nucleobase, nucleoside, nucleotide and nucleic acid metabolic process	3.58652	8.10009	11.7532
GO:0010556_regulation of macromolecule biosynthetic process	3.56863	11.1359	11.5489
GO:0045449_regulation of transcription	3.56158	8.93051	11.3185
GO:0007242_intracellular signaling cascade	2.95504	1.16888	2.04745
GO:0006457_protein folding	2.82039	12.3606	2.03228
GO:0007167_enzyme linked receptor protein signaling pathway	2.64238	1.58581
GO:0016311_dephosphorylation	1.82137	0.782237
GO:0007243_protein kinase cascade	1.77054
GO:0016310_phosphorylation	1.72721	1.55799
GO:0007264_small GTPase mediated signal transduction	1.72546	0.750308	1.72898
GO:0010558_negative regulation of macromolecule biosynthetic process	1.50219	3.7141	1.02016
GO:0031327_negative regulation of cellular biosynthetic process	1.33722	3.62573	0.8512
GO:0010629_negative regulation of gene expression	1.31095	4.94084	1.13911
GO:0009890_negative regulation of biosynthetic process	1.29495	3.50198	0.800965
GO:0016481_negative regulation of transcription	1.21869	3.11799
GO:0016070_RNA metabolic process		18.8553	5.77623
GO:0006396_RNA processing		16.5183	6.7205
GO:0016071_mRNA metabolic process		15.9204	6.62729
GO:0008380_RNA splicing		15.6233	4.38645
GO:0006397_mRNA processing		14.7241	4.85011
GO:0016568_chromatin modification		6.89921	7.54079
GO:0044257_cellular protein catabolic process		5.24524	4.62993
GO:0010605_negative regulation of macromolecule metabolic process		5.05451	0.731695
GO:0043632_modification-dependent macromolecule catabolic process		4.98659	5.38487
GO:0030163_protein catabolic process		4.63661	4.52351
GO:0031324_negative regulation of cellular metabolic process	0.679107	3.54099	0.927329
GO:0006913_nucleocytoplasmic transport		3.38116
GO:0051169_nuclear transport		3.23889
GO:0045934_negative regulation of nucleobase, nucleoside, nucleotide and nucleic acid metabolic process	0.907575	3.20687	1.09125
GO:0051172_negative regulation of nitrogen compound metabolic process	0.863468	3.08337	1.03517
GO:0010608_posttranscriptional regulation of gene expression		3.00105
GO:0051246_regulation of protein metabolic process		2.90401
GO:0051253_negative regulation of RNA metabolic process	0.875576	2.4448	0.736007
GO:0050658_RNA transport		2.42748
GO:0050657_nucleic acid transport		2.42748
GO:0051348_negative regulation of transferase activity		2.36204
GO:0015031_protein transport		2.2286	2.08304
GO:0032268_regulation of cellular protein metabolic process		2.22378
GO:0045892_negative regulation of transcription, DNA-dependent	0.902499	2.2185
GO:0051028_mRNA transport		2.19155
GO:0006417_regulation of translation		2.15529
GO:0006333_chromatin assembly or disassembly		2.09577
GO:0043549_regulation of kinase activity	0.717759	1.81578
GO:0006605_protein targeting		1.73321
GO:0008286_insulin receptor signaling pathway	0.704704	1.64241	0.76626
GO:0051329_interphase of mitotic cell cycle		1.55844
GO:0006886_intracellular protein transport		1.50218
GO:0034470_ncRNA processing		1.42914
GO:0051325_interphase		1.41269
GO:0006983_ER overload response		1.40782
GO:0007219_Notch signaling pathway		1.21216
GO:0050684_regulation of mRNA processing		1.18701
GO:0034660_ncRNA metabolic process		1.18567
GO:0051252_regulation of RNA metabolic process	0.767378	1.17258
GO:0043414_biopolymer methylation		1.13331
GO:0051174_regulation of phosphorus metabolic process	0.70825	1.11777
GO:0019220_regulation of phosphate metabolic process	0.70825	1.11777
GO:0009452_RNA capping		1.11087
GO:0033365_protein localization in organelle		1.08055
GO:0016458_gene silencing		1.03161
GO:0032869_cellular response to insulin stimulus	0.689425	0.952391	1.73957
GO:0030522_intracellular receptor-mediated signaling pathway			1.15172
