# Supplementary material for: Social interaction-induced activation of RNA splicing in the amygdala of microbiome-deficient mice
Source: eLife. 2018 May 29;7:e33070. doi: 10.7554/eLife.33070 (PMC5995540; doi:10.7554/eLife.33070)
Supplement: Supplementary file 4. [file elife-33070-supp4.xlsx]

## Sheet: CON_GF
geneID	chr	start	end	total_exons	exon_changes
ENSMUSG00000000441	6	115618067	115676635	27	1
ENSMUSG00000000531	15	101224207	101232755	8	1
ENSMUSG00000000538	11	60226714	60352905	28	4
ENSMUSG00000000563	3	105942698	105960099	18	1
ENSMUSG00000000787	X	13280970	13294052	29	1
ENSMUSG00000000826	2	181520485	181555133	20	1
ENSMUSG00000001289 ENSMUSG00000001285	15	102326116	102338139	47	2
ENSMUSG00000001380	18	36766530	36783205	13	2
ENSMUSG00000001472	8	123373824	123404173	20	1
ENSMUSG00000001576	17	26561489	26656931	24	2
ENSMUSG00000002107	2	6539694	7509563	70	2
ENSMUSG00000002718	2	166906040	166946389	52	1
ENSMUSG00000002741	11	5955693	5967780	9	1
ENSMUSG00000002957	7	141562180	141633011	22	1
ENSMUSG00000002985	7	19696109	19699166	25	5
ENSMUSG00000003161	5	8046078	8069379	19	2
ENSMUSG00000003273	7	45699843	45704682	13	1
ENSMUSG00000003363	7	27532000	27553218	30	3
ENSMUSG00000003731	4	129643980	129672767	23	1
ENSMUSG00000003813	8	84834019	84840665	24	1
ENSMUSG00000003814	8	84841850	84846934	17	1
ENSMUSG00000003949	11	90336536	90390895	15	1
ENSMUSG00000004071	16	4750348	4790292	17	2
ENSMUSG00000004110	1	154390731	154884501	62	1
ENSMUSG00000004113	2	24603887	24763152	70	1
ENSMUSG00000004207	10	60277627	60302597	21	2
ENSMUSG00000004267	6	124760053	124769673	44	7
ENSMUSG00000004364	1	80264923	80340480	28	1
ENSMUSG00000004558	14	51905271	51913488	16	1
ENSMUSG00000004937	10	81044075	81060178	12	2
ENSMUSG00000005034	3	146729579	146812960	17	4
ENSMUSG00000005045	4	152338651	152390194	49	2
ENSMUSG00000005089	2	102658659	102790784	34	3
ENSMUSG00000005103	5	38526814	38561666	15	1
ENSMUSG00000005371	17	87990859	88065291	29	2
ENSMUSG00000005442	7	25267704	25294159	51	1
ENSMUSG00000005566	7	13024152	13031035	36	3
ENSMUSG00000005610 ENSMUSG00000088948	7	111070568	111083030	54	3
ENSMUSG00000005683	10	128337832	128362479	11	1
ENSMUSG00000005813	3	138458960	138489382	11	1
ENSMUSG00000005893	6	92091390	92173057	25	1
ENSMUSG00000005936	17	28951950	28969549	20	1
ENSMUSG00000006005	1	150392838	150449935	81	1
ENSMUSG00000006057	11	96068852	96075670	12	4
ENSMUSG00000006575	11	102393403	102402555	27	1
ENSMUSG00000006586	4	13743436	13893649	21	1
ENSMUSG00000006651	7	30434981	30445582	17	1
ENSMUSG00000006673 ENSMUSG00000032604 ENSMUSG00000103970	9	108507713	108560163	107	1
ENSMUSG00000006740	18	6201002	6242174	42	4
ENSMUSG00000007097	1	172271709	172298064	28	2
ENSMUSG00000007617	13	93303757	93404129	27	4
ENSMUSG00000007850	11	50376990	50386528	48	3
ENSMUSG00000007880	4	133679008	133756769	31	1
ENSMUSG00000008153	6	124430759	124464794	30	1
ENSMUSG00000008206	8	4493026	4531680	31	1
ENSMUSG00000008429	9	25108130	25151781	8	1
ENSMUSG00000008658	16	6809222	7412479	16	1
ENSMUSG00000008690	15	89355719	89372826	49	1
ENSMUSG00000008855 ENSMUSG00000098863	11	102194432	102230166	78	1
ENSMUSG00000008892	8	22577075	22593813	10	1
ENSMUSG00000009013	5	115297110	115300999	12	6
ENSMUSG00000009394	6	115134902	115282626	14	3
ENSMUSG00000009575	15	103191544	103239816	13	1
ENSMUSG00000009905	1	106720459	106759727	15	1
ENSMUSG00000010095	19	8706882	8723369	11	2
ENSMUSG00000010554	11	74770830	74828525	22	1
ENSMUSG00000010803	11	42130939	42182930	17	1
ENSMUSG00000011256	11	46055992	46147343	28	1
ENSMUSG00000011831	5	107744795	107875107	46	2
ENSMUSG00000013033	8	83900105	83941954	40	3
ENSMUSG00000013089	16	22381309	22439719	23	1
ENSMUSG00000013236	17	56412431	56476483	38	2
ENSMUSG00000013663	19	32757497	32826160	13	1
ENSMUSG00000013698	1	172196728	172206804	12	1
ENSMUSG00000013921	7	30291672	30308367	28	1
ENSMUSG00000014077	2	119547697	119587027	15	1
ENSMUSG00000014592	4	150917322	151861876	52	1
ENSMUSG00000014602	1	93015464	93101951	75	3
ENSMUSG00000014956	5	32458974	32517433	14	1
ENSMUSG00000015002	15	65787034	65873816	45	2
ENSMUSG00000015149	7	28766735	28788665	31	1
ENSMUSG00000015222	1	66175273	66442583	68	2
ENSMUSG00000015291	X	74304998	74311862	34	3
ENSMUSG00000015882	5	45697181	45857615	25	1
ENSMUSG00000015932	2	143915320	143943324	4	1
ENSMUSG00000015944	5	134099711	134144343	10	1
ENSMUSG00000016559	11	116021912	116027962	14	1
ENSMUSG00000017132	11	118132019	118248592	25	1
ENSMUSG00000017286 ENSMUSG00000049396 ENSMUSG00000017288	11	76046226	76243725	81	1
ENSMUSG00000017291	11	77529162	77607815	21	2
ENSMUSG00000017376	11	78567168	78697373	20	1
ENSMUSG00000017639	11	79591212	79698023	17	1
ENSMUSG00000017670	2	165288031	165326479	39	1
ENSMUSG00000017734 ENSMUSG00000090996 ENSMUSG00000045503	2	164456964	164493319	35	1
ENSMUSG00000017781	11	75588097	75628804	24	1
ENSMUSG00000017978	6	23262773	23839421	61	1
ENSMUSG00000018076	5	118560719	118765435	31	1
ENSMUSG00000018196	1	143716338	143749676	38	1
ENSMUSG00000018209	2	164070322	164155524	18	1
ENSMUSG00000018326	2	163994960	164018588	8	3
ENSMUSG00000018548	11	87127077	87220683	29	1
ENSMUSG00000018707	12	110601452	110666945	92	6
ENSMUSG00000018770	2	73908447	73911326	14	1
ENSMUSG00000019054	5	136953275	136966234	17	2
ENSMUSG00000019087	X	74297097	74304721	35	9
ENSMUSG00000019179	5	135778480	135790398	15	1
ENSMUSG00000019189	11	44518964	44565520	21	1
ENSMUSG00000019194	7	31116524	31126945	9	2
ENSMUSG00000019302	11	101009452	101063719	40	1
ENSMUSG00000019370	7	16915379	16924114	16	2
ENSMUSG00000019428	8	70527724	70535328	32	2
ENSMUSG00000019505	11	62551171	62553213	4	2
ENSMUSG00000019699	1	177020073	177258203	18	1
ENSMUSG00000019790	10	9755547	9901079	50	1
ENSMUSG00000019852	10	18588011	18743758	34	2
ENSMUSG00000020022	10	94198955	94221443	11	3
ENSMUSG00000020032	10	84370905	84440597	9	1
ENSMUSG00000020107	10	59987409	60003135	20	1
ENSMUSG00000020142	11	20302180	20332713	10	1
ENSMUSG00000020176	11	11930508	12038683	28	1
ENSMUSG00000020262	10	77290726	77418270	34	2
ENSMUSG00000020271	11	32642724	32746816	22	1
ENSMUSG00000020290	11	23256041	23298249	42	1
ENSMUSG00000020402	11	52360860	52389397	18	4
ENSMUSG00000020456	11	6291633	6356642	38	5
ENSMUSG00000020457 ENSMUSG00000023764	11	3131850	3266415	91	1
ENSMUSG00000020463	11	29172890	29220797	28	1
ENSMUSG00000020484	11	5520659	5525893	11	1
ENSMUSG00000020516	11	86498871	86544805	29	1
ENSMUSG00000020577	12	36014557	36042500	10	1
ENSMUSG00000020589	12	12262139	12376359	13	1
ENSMUSG00000020598	12	44328885	44601846	32	3
ENSMUSG00000020612	11	109649405	109669656	17	1
ENSMUSG00000020634	12	4879032	4907705	11	1
ENSMUSG00000020668	12	3365132	3406494	8	3
ENSMUSG00000020708	11	106256154	106263120	12	1
ENSMUSG00000020777	11	116171888	116199045	23	1
ENSMUSG00000020817	11	70844778	70943105	35	1
ENSMUSG00000020823	11	117115168	117159268	28	1
ENSMUSG00000020840	11	76924809	76987379	32	1
ENSMUSG00000020859	11	93996091	94126085	56	2
ENSMUSG00000020886	11	70017085	70045532	46	1
ENSMUSG00000020894	11	69088490	69092384	16	3
ENSMUSG00000020923	11	102304560	102319742	42	2
ENSMUSG00000020936	11	103028190	103068912	18	1
ENSMUSG00000020962	12	91555916	91590487	13	1
ENSMUSG00000020978	12	69296681	69310687	21	2
ENSMUSG00000021007	12	98628157	98669815	21	1
ENSMUSG00000021062	12	76797960	76822908	19	1
ENSMUSG00000021097	12	104763114	104865076	14	1
ENSMUSG00000021109	12	73901375	73947530	23	2
ENSMUSG00000021130	12	80518990	80603896	15	1
ENSMUSG00000021241	12	84773270	84775089	4	1
ENSMUSG00000021244	12	84996321	85070515	36	1
ENSMUSG00000021314	13	18948371	19150913	21	3
ENSMUSG00000021373	13	46501848	46649642	18	1
ENSMUSG00000021377	13	47084775	47106201	20	1
ENSMUSG00000021395	13	51100880	51152546	6	2
ENSMUSG00000021660	13	98309896	98317006	15	2
ENSMUSG00000021711	13	104142149	104178469	26	2
ENSMUSG00000021756	13	112464070	112510086	35	1
ENSMUSG00000021775	14	18204054	18239127	10	1
ENSMUSG00000021794	14	34310727	34345144	21	1
ENSMUSG00000021823	14	20929433	21033673	21	1
ENSMUSG00000021843	14	47648448	47736564	77	1
ENSMUSG00000021910	14	31170930	31216946	77	1
ENSMUSG00000022000	14	75284373	75344426	19	2
ENSMUSG00000022008	14	76086232	76110815	8	1
ENSMUSG00000022037	14	65968483	65981548	26	2
ENSMUSG00000022044	14	66344296	66361680	24	1
ENSMUSG00000022048	14	66802864	66868688	14	2
ENSMUSG00000022051	14	66985239	67008877	18	1
ENSMUSG00000022139	14	120275669	120431697	9	1
ENSMUSG00000022151	15	5185525	5218336	12	1
ENSMUSG00000022159	14	52261759	52279545	24	2
ENSMUSG00000022174	14	54235479	54254104	5	2
ENSMUSG00000022185	14	54642161	54686931	69	1
ENSMUSG00000022223	14	55897286	55900232	6	1
ENSMUSG00000022263	15	27730652	28025848	57	1
ENSMUSG00000022314	15	51962605	51991760	14	2
ENSMUSG00000022338	15	44428111	44437685	5	1
ENSMUSG00000022362 ENSMUSG00000022361 ENSMUSG00000101892	15	58022259	58076541	40	1
ENSMUSG00000022377	15	64086857	64382919	59	1
ENSMUSG00000022390	15	81744848	81796269	23	1
ENSMUSG00000022391	15	81704248	81729919	20	1
ENSMUSG00000022451	15	94577951	94589889	16	1
ENSMUSG00000022454	15	95219451	95528706	23	2
ENSMUSG00000022463	15	82147266	82205376	19	1
ENSMUSG00000022494	16	11984113	12270902	11	1
ENSMUSG00000022607	15	73205105	73423191	34	1
ENSMUSG00000022619	15	89453913	89464468	14	2
ENSMUSG00000022636	16	52248996	52454074	27	1
ENSMUSG00000022710	16	8689595	8792308	60	2
ENSMUSG00000022841	16	20535478	20544909	33	1
ENSMUSG00000022973	16	90936092	91011308	54	4
ENSMUSG00000022982	16	90220742	90226322	5	1
ENSMUSG00000023004	15	98931425	98934565	7	1
ENSMUSG00000023017	15	99670718	99701127	12	1
ENSMUSG00000023019	15	99717515	99725005	14	1
ENSMUSG00000023033	15	100870683	101045929	35	2
ENSMUSG00000023055	15	102706779	102722178	23	1
ENSMUSG00000023927 ENSMUSG00000103779	17	51736187	51833290	42	1
ENSMUSG00000023960	17	44078813	44086567	11	4
ENSMUSG00000024012	17	29332072	29347904	26	1
ENSMUSG00000024059	17	71781947	71858351	16	1
ENSMUSG00000024073	17	74528295	74703356	122	1
ENSMUSG00000024077	17	78649913	78737196	23	2
ENSMUSG00000024099	17	66078795	66101559	15	1
ENSMUSG00000024122	17	24073680	24150924	36	2
ENSMUSG00000024127	17	85063477	85090267	15	1
ENSMUSG00000024163 ENSMUSG00000073436	17	24888486	24936977	111	1
ENSMUSG00000024238	18	5591860	5775467	32	1
ENSMUSG00000024242	17	80580512	80728093	36	1
ENSMUSG00000024268	18	25477632	25753983	14	7
ENSMUSG00000024283	18	7868832	7973547	55	2
ENSMUSG00000024294	18	10725548	10818704	34	1
ENSMUSG00000024335	17	34112023	34122634	44	1
ENSMUSG00000024381	18	32377217	32435736	19	1
ENSMUSG00000024392	17	35135178	35147322	63	7
ENSMUSG00000024393	17	35149076	35164897	44	1
ENSMUSG00000024454	18	37935844	37954988	25	2
ENSMUSG00000024462	17	37045966	37075067	44	1
ENSMUSG00000024472	18	44380500	44424969	11	1
ENSMUSG00000024487	18	40204865	40219399	6	2
ENSMUSG00000024500	18	42637432	43059471	22	2
ENSMUSG00000024524	18	67088336	67226792	13	1
ENSMUSG00000024576	18	61555274	61590061	32	2
ENSMUSG00000024617	18	60925618	60988152	30	4
ENSMUSG00000024639	19	16132831	16387463	11	2
ENSMUSG00000024687	19	11965844	11994105	14	1
ENSMUSG00000024781	19	34492318	34527474	11	1
ENSMUSG00000024862	19	5107746	5118560	37	1
ENSMUSG00000024870	19	5099207	5106996	6	3
ENSMUSG00000024897	19	23758876	23949597	13	1
ENSMUSG00000024921	19	26605115	26778321	68	1
ENSMUSG00000024935	19	28835049	28913960	20	1
ENSMUSG00000024939 ENSMUSG00000079478	19	5728087	5731732	23	1
ENSMUSG00000024969	19	7275396	7341860	69	1
ENSMUSG00000025041	19	46886831	47015153	23	1
ENSMUSG00000025162	11	120961749	120991330	25	1
ENSMUSG00000025178	19	42090435	42122218	9	1
ENSMUSG00000025203 ENSMUSG00000093315	19	44293676	44306864	8	1
ENSMUSG00000025277	14	8002902	8056555	11	1
ENSMUSG00000025290	14	24490681	24496146	6	2
ENSMUSG00000025314	2	90429754	90580647	31	1
ENSMUSG00000025369	10	128459236	128490173	30	6
ENSMUSG00000025373	10	128411616	128441438	9	1
ENSMUSG00000025393	10	128083273	128090391	29	1
ENSMUSG00000025404	10	127380327	127499384	66	1
ENSMUSG00000025417	10	127197067	127211622	10	2
ENSMUSG00000025555	14	121035200	121283744	33	1
ENSMUSG00000025558	14	121542039	121797734	56	1
ENSMUSG00000025576	11	118489762	118911597	31	1
ENSMUSG00000025586	7	81347026	81455465	29	1
ENSMUSG00000025656	X	95048935	95196821	42	2
ENSMUSG00000025658	X	157821436	158043294	25	1
ENSMUSG00000025777	1	17145362	17164271	16	2
ENSMUSG00000025781	2	10056016	10080510	25	2
ENSMUSG00000025825	5	113772748	113778288	18	1
ENSMUSG00000025856	5	138976014	138997370	21	1
ENSMUSG00000025860	X	42059679	42109656	24	1
ENSMUSG00000025867	13	54371349	54383917	4	4
ENSMUSG00000025917	1	10024601	10038168	22	1
ENSMUSG00000025964	1	63445891	63596276	46	1
ENSMUSG00000025969	1	62703285	62818695	22	1
ENSMUSG00000025982	1	54985169	55027481	43	1
ENSMUSG00000026103	1	52163448	52233232	53	1
ENSMUSG00000026113	1	37299865	37410736	54	2
ENSMUSG00000026150	1	82724890	82752394	39	7
ENSMUSG00000026159 ENSMUSG00000093782	1	82839446	82901182	31	2
ENSMUSG00000026163	1	83254139	83408200	20	2
ENSMUSG00000026219	1	84721189	84840516	80	3
ENSMUSG00000026223	1	85894281	85908675	10	2
ENSMUSG00000026234 ENSMUSG00000064837 ENSMUSG00000064696	1	86344719	86359400	31	1
ENSMUSG00000026276	1	93478964	93510260	43	1
ENSMUSG00000026319	1	105663861	105755191	55	1
ENSMUSG00000026341	1	125392905	125435727	34	4
ENSMUSG00000026360	1	143999338	144004161	12	1
ENSMUSG00000026442	1	132564690	132741797	51	1
ENSMUSG00000026470	1	155158715	155208256	28	1
ENSMUSG00000026484	1	151458004	151500955	21	1
ENSMUSG00000026490	1	179960472	180165603	74	2
ENSMUSG00000026553	1	172082529	172122330	56	3
ENSMUSG00000026554	1	172148084	172197005	39	1
ENSMUSG00000026571	1	165328698	165460475	31	2
ENSMUSG00000026576	1	164437109	164458355	11	4
ENSMUSG00000026585	1	163779583	163917109	21	1
ENSMUSG00000026587	1	158362273	158691781	48	2
ENSMUSG00000026623	1	191717834	191784255	17	1
ENSMUSG00000026643	2	3284212	3328877	22	1
ENSMUSG00000026764	2	49619298	49774778	37	1
ENSMUSG00000026782	1	60409619	60481158	36	1
ENSMUSG00000026788	2	33450287	33468559	12	1
ENSMUSG00000026827	2	57237635	57370719	28	1
ENSMUSG00000026878	2	35180205	35201120	22	1
ENSMUSG00000026883	2	35558266	35730994	41	1
ENSMUSG00000026904	2	62046462	62326730	37	1
ENSMUSG00000026959	2	25291181	25319187	42	2
ENSMUSG00000026991	2	59160850	59355208	50	1
ENSMUSG00000027002	2	80500512	80581380	41	4
ENSMUSG00000027006	2	80315466	80354043	31	1
ENSMUSG00000027012	2	71211706	71263303	40	1
ENSMUSG00000027067	2	85037234	85047109	33	1
ENSMUSG00000027104 ENSMUSG00000099302	2	73816509	73892639	47	1
ENSMUSG00000027184	2	103762941	103797649	52	1
ENSMUSG00000027193	2	94411682	94438136	22	2
ENSMUSG00000027244	2	91674618	91710576	29	1
ENSMUSG00000027245 ENSMUSG00000074884	2	121449195	121458672	35	1
ENSMUSG00000027248	2	121413775	121438687	19	2
ENSMUSG00000027255	2	91264974	91276931	28	1
ENSMUSG00000027273	2	136713453	136782428	13	2
ENSMUSG00000027340	2	132052496	132145108	29	1
ENSMUSG00000027405 ENSMUSG00000065289 ENSMUSG00000093645 ENSMUSG00000065287 ENSMUSG00000065272	2	130274430	130279313	68	9
ENSMUSG00000027438	2	148693985	148732467	15	1
ENSMUSG00000027523	2	174284320	174346744	46	2
ENSMUSG00000027566	2	180036373	180042433	22	1
ENSMUSG00000027573	2	180710117	180718733	9	1
ENSMUSG00000027581	2	181306459	181314500	5	1
ENSMUSG00000027634	2	156927345	156992056	40	4
ENSMUSG00000027646	2	157418444	157471862	30	1
ENSMUSG00000027665	3	32397671	32468486	27	1
ENSMUSG00000027692	3	28263214	28675858	55	3
ENSMUSG00000027712	3	36448926	36475887	13	1
ENSMUSG00000027784	3	69316861	69560802	10	1
ENSMUSG00000027797	3	55242526	55539064	21	1
ENSMUSG00000027799	3	55625205	56183701	58	2
ENSMUSG00000027823	3	63976106	64022579	16	2
ENSMUSG00000027893	3	107663118	107696560	34	1
ENSMUSG00000027895	3	107438303	107458898	4	1
ENSMUSG00000027940	3	90072649	90100902	42	7
ENSMUSG00000027993	3	84160439	84305446	48	1
ENSMUSG00000028035	3	152178511	152210279	15	1
ENSMUSG00000028059	3	88607454	88648052	92	1
ENSMUSG00000028126	3	95058530	95106930	30	1
ENSMUSG00000028127	3	121758910	121815215	23	1
ENSMUSG00000028152	3	138742195	138904433	26	5
ENSMUSG00000028161	3	136670124	136937727	25	4
ENSMUSG00000028233	4	3574875	3616619	22	1
ENSMUSG00000028399	4	75941238	78211961	82	4
ENSMUSG00000028414	4	53713998	53765785	16	1
ENSMUSG00000028452	4	42979963	43000507	27	1
ENSMUSG00000028517	4	105157347	105232764	6	1
ENSMUSG00000028528	4	101496648	101642799	33	1
ENSMUSG00000028530	4	101152367	101265282	43	1
ENSMUSG00000028552	4	109280268	109387817	46	1
ENSMUSG00000028580	4	130663321	130781564	35	1
ENSMUSG00000028649	4	123349633	123684360	140	3
ENSMUSG00000028676	4	135855747	135869908	24	1
ENSMUSG00000028756 ENSMUSG00000099200 ENSMUSG00000098364	4	138313409	138326307	16	1
ENSMUSG00000028790	4	129703164	129742303	19	1
ENSMUSG00000028821	4	134930898	134937548	12	1
ENSMUSG00000028849	4	126232167	126256343	28	1
ENSMUSG00000028851	4	133532542	133545996	11	1
ENSMUSG00000028931 ENSMUSG00000089757	4	152390742	152477871	47	3
ENSMUSG00000028944	5	24862744	25100642	35	1
ENSMUSG00000029064	4	155491361	155559269	27	2
ENSMUSG00000029106 ENSMUSG00000099082	5	34573664	34632308	46	2
ENSMUSG00000029110	5	34336289	34355629	31	1
ENSMUSG00000029189	5	53107084	53213452	24	1
ENSMUSG00000029202	5	65615260	65697856	32	1
ENSMUSG00000029203	5	65537233	65598988	16	2
ENSMUSG00000029212	5	71699932	72138389	9	1
ENSMUSG00000029213	5	72157000	72168183	5	1
ENSMUSG00000029291	5	88583574	88642671	13	2
ENSMUSG00000029309	5	104079111	104114088	11	1
ENSMUSG00000029330	5	101765130	101823858	15	1
ENSMUSG00000029390	5	124540695	124550506	9	1
ENSMUSG00000029392	5	124493082	124531391	7	1
ENSMUSG00000029405	5	92052146	92083735	16	2
ENSMUSG00000029406	5	124118690	124249760	44	2
ENSMUSG00000029471	5	122731173	122779410	16	1
ENSMUSG00000029472	5	122787469	122821339	17	1
ENSMUSG00000029512	5	110784488	110810097	28	1
ENSMUSG00000029602	5	120648812	120679597	30	2
ENSMUSG00000029621	5	145083830	145108761	22	1
ENSMUSG00000029651	5	147957320	148316065	35	1
ENSMUSG00000029657	5	149614287	149636376	30	2
ENSMUSG00000029686	6	47453398	47526139	45	7
ENSMUSG00000029726	5	137781906	137786715	10	1
ENSMUSG00000029765	6	32144268	32588192	32	1
ENSMUSG00000029772	6	29768011	29912310	64	1
ENSMUSG00000029920	6	65042667	65116050	24	1
ENSMUSG00000029992	6	87042846	87092197	28	1
ENSMUSG00000030057	6	87842615	87851106	17	1
ENSMUSG00000030058	6	87887814	87913595	47	1
ENSMUSG00000030077	6	103510876	103733035	27	2
ENSMUSG00000030102	6	108213118	108551109	62	7
ENSMUSG00000030134	6	118066385	118091546	13	1
ENSMUSG00000030209	6	135713232	136173511	22	2
ENSMUSG00000030268	6	144993835	145076184	26	1
ENSMUSG00000030302	6	113745669	114042613	40	1
ENSMUSG00000030313	6	148988071	149101680	30	1
ENSMUSG00000030337	6	125215551	125244543	12	1
ENSMUSG00000030605	7	79133769	79149060	10	1
ENSMUSG00000030653	7	101421691	101512829	36	1
ENSMUSG00000030685 ENSMUSG00000030683 ENSMUSG00000095334	7	126928879	126970606	49	1
ENSMUSG00000030770	7	112427505	112591692	24	1
ENSMUSG00000030806	7	127803900	127824549	13	2
ENSMUSG00000030816	7	127588698	127603605	20	1
ENSMUSG00000030846	7	128439777	128461717	38	1
ENSMUSG00000030854	7	47077798	47133684	39	1
ENSMUSG00000030898	7	105425817	105470898	7	1
ENSMUSG00000031012	X	13517080	13851367	48	1
ENSMUSG00000031021	7	109735834	109752875	10	1
ENSMUSG00000031028	7	109010825	109034460	16	1
ENSMUSG00000031066	X	20703906	20720539	30	4
ENSMUSG00000031154	X	7841364	7876626	34	1
ENSMUSG00000031229	X	105797615	105929397	76	1
ENSMUSG00000031242	X	107782751	107816334	10	1
ENSMUSG00000031278	X	142317993	142390535	24	1
ENSMUSG00000031292	X	160784308	160994702	21	1
ENSMUSG00000031389 ENSMUSG00000031388 ENSMUSG00000031391	X	73853778	73921944	150	4
ENSMUSG00000031422	X	136732942	136743690	25	1
ENSMUSG00000031425	X	136822671	136839733	14	3
ENSMUSG00000031428 ENSMUSG00000083445	X	136993155	136998472	13	1
ENSMUSG00000031432	X	140456613	140476140	8	1
ENSMUSG00000031446	8	13105621	13147940	32	1
ENSMUSG00000031517	8	54954728	55060877	7	1
ENSMUSG00000031584	8	33652523	33698163	17	1
ENSMUSG00000031601	8	40492540	40515847	29	1
ENSMUSG00000031618	8	76899442	77245012	24	1
ENSMUSG00000031654	8	87468854	87472592	7	1
ENSMUSG00000031672	8	95864134	95888547	12	3
ENSMUSG00000031696	8	85260397	85299513	17	8
ENSMUSG00000031729	8	109671322	109693294	10	1
ENSMUSG00000031731	8	109778554	109864204	34	1
ENSMUSG00000031748	8	93809966	93969388	30	1
ENSMUSG00000031818	8	120668222	120674207	18	1
ENSMUSG00000031839	8	119344538	119348927	4	1
ENSMUSG00000031858	8	70016123	70042734	23	1
ENSMUSG00000031865	6	83165920	83200117	57	2
ENSMUSG00000031917	8	107056877	107060926	5	1
ENSMUSG00000031950	8	111940703	111953612	8	2
ENSMUSG00000031988	9	27004503	27030094	6	3
ENSMUSG00000032011	9	44043384	44048579	4	3
ENSMUSG00000032036	9	34485894	35036716	34	1
ENSMUSG00000032076	9	47530173	47857637	26	4
ENSMUSG00000032181	9	75643264	75683996	12	2
ENSMUSG00000032216	9	72662346	72749852	47	2
ENSMUSG00000032224	9	70089310	70142560	15	1
ENSMUSG00000032238	9	68653786	69388246	22	1
ENSMUSG00000032279	9	54586511	54604661	11	1
ENSMUSG00000032294	9	59656368	59679375	12	1
ENSMUSG00000032329	9	56418644	56496884	10	1
ENSMUSG00000032336	9	58582240	58657955	39	3
ENSMUSG00000032340	9	58874679	59036441	29	1
ENSMUSG00000032356	9	89909908	90026977	34	1
ENSMUSG00000032382	9	66088133	66126587	28	1
ENSMUSG00000032393	9	65032458	65082650	23	2
ENSMUSG00000032399	9	64173387	64178562	10	2
ENSMUSG00000032482	9	110243783	110262575	5	1
ENSMUSG00000032503	9	112065091	112235938	81	11
ENSMUSG00000032512	9	119894895	119926579	19	1
ENSMUSG00000032526	9	121710389	121712921	3	1
ENSMUSG00000032536	9	121366958	121474916	16	1
ENSMUSG00000032549	9	103111787	103185276	10	5
ENSMUSG00000032562	9	107614125	107635367	30	2
ENSMUSG00000032582	9	107773559	107873237	56	1
ENSMUSG00000032589	9	108096022	108190384	15	2
ENSMUSG00000032595 ENSMUSG00000032594 ENSMUSG00000032596 ENSMUSG00000079323 ENSMUSG00000093456	9	107975505	108048782	157	1
ENSMUSG00000032773	19	8663789	8683587	6	1
ENSMUSG00000032826	3	126921606	127499259	113	7
ENSMUSG00000032870	4	120968317	121017247	11	1
ENSMUSG00000032883 ENSMUSG00000079470	1	78657825	78707743	32	2
ENSMUSG00000032936	9	107935846	107949691	22	1
ENSMUSG00000032966	2	151542483	151561692	27	2
ENSMUSG00000033004	14	103113411	103346814	96	1
ENSMUSG00000033009	8	94037198	94067921	24	2
ENSMUSG00000033066	11	67455437	67688990	37	4
ENSMUSG00000033105	10	76531588	76557138	39	1
ENSMUSG00000033174	6	88724412	88828360	19	1
ENSMUSG00000033186	14	99034544	99046136	3	1
ENSMUSG00000033228	15	96411698	96460843	15	1
ENSMUSG00000033361	X	71962624	71972722	8	1
ENSMUSG00000033478	19	57361009	57389594	17	1
ENSMUSG00000033569	1	25067476	25829707	51	2
ENSMUSG00000033577	9	80165031	80311729	56	2
ENSMUSG00000033615	5	108518554	108550024	7	2
ENSMUSG00000033763	8	110721476	110741400	27	2
ENSMUSG00000033916	7	13032006	13034777	6	3
ENSMUSG00000034007	9	55549883	55919605	31	1
ENSMUSG00000034021	5	150673739	150810690	47	1
ENSMUSG00000034160	X	101640060	101684351	38	3
ENSMUSG00000034171	4	115967145	116017926	34	1
ENSMUSG00000034187	11	103821782	103954056	38	1
ENSMUSG00000034345	17	6079786	6086517	7	1
ENSMUSG00000034593	9	75071015	75223688	66	2
ENSMUSG00000034656	8	84388440	84640246	67	1
ENSMUSG00000034709	17	88530118	88588367	32	1
ENSMUSG00000034724	5	96070333	96164171	31	1
ENSMUSG00000034730 ENSMUSG00000093340	15	74516195	74589465	57	3
ENSMUSG00000034799	8	71624417	71671757	64	1
ENSMUSG00000034868	17	70973920	70990787	8	1
ENSMUSG00000034928	13	54679399	54693907	51	1
ENSMUSG00000035033	2	61802930	61814114	14	1
ENSMUSG00000035045	X	95711678	95932637	20	1
ENSMUSG00000035051	17	80238304	80290476	24	1
ENSMUSG00000035152	11	83299024	83405035	36	9
ENSMUSG00000035203	7	5080235	5098178	24	1
ENSMUSG00000035247	12	51743722	51829536	48	3
ENSMUSG00000035268	2	163658386	163726158	21	1
ENSMUSG00000035325	5	100361649	100416234	51	1
ENSMUSG00000035390	7	4690604	4715997	24	2
ENSMUSG00000035629	16	32821703	32877766	37	1
ENSMUSG00000035653	12	61523150	61858342	13	1
ENSMUSG00000035764	16	32230112	32247158	3	1
ENSMUSG00000035847	X	70343069	70365084	12	2
ENSMUSG00000035851	5	86804221	86836659	33	1
ENSMUSG00000035864	10	108497650	109010982	23	1
ENSMUSG00000035901	7	109893780	109960470	36	1
ENSMUSG00000035992	11	54438199	54518235	20	1
ENSMUSG00000036155	1	127205015	127488336	25	2
ENSMUSG00000036197	15	93239742	93275161	11	1
ENSMUSG00000036333	12	24974932	25059697	32	1
ENSMUSG00000036371	6	67266979	67289302	8	1
ENSMUSG00000036427	7	34202122	34230289	24	2
ENSMUSG00000036435	5	76529311	76570294	42	1
ENSMUSG00000036438	17	87433412	87446935	11	1
ENSMUSG00000036450	19	44562850	44576274	9	1
ENSMUSG00000036469	8	65617900	66471637	29	1
ENSMUSG00000036564	8	95676980	95715119	36	3
ENSMUSG00000036578	7	31042517	31051462	6	1
ENSMUSG00000036591	2	20847919	20968881	68	1
ENSMUSG00000036617	2	19909780	20810713	59	2
ENSMUSG00000036748	19	46329812	46338660	10	1
ENSMUSG00000036766	1	84369839	84696221	18	2
ENSMUSG00000036800	15	71445678	71727838	20	1
ENSMUSG00000036825	3	146404642	146440139	28	1
ENSMUSG00000036940	4	136550540	136602723	40	2
ENSMUSG00000036985	X	48171969	48208878	22	1
ENSMUSG00000037032	7	105558483	105581653	55	8
ENSMUSG00000037111	3	51515319	51560879	14	2
ENSMUSG00000037126	19	46312087	46327156	19	3
ENSMUSG00000037259	2	144470557	144527414	27	2
ENSMUSG00000037331	11	58009064	58062034	25	1
ENSMUSG00000037373	5	33247724	33275004	9	1
ENSMUSG00000037415	8	105768308	105827350	14	1
ENSMUSG00000037605	5	81020138	81825133	72	2
ENSMUSG00000037608	10	20312469	20344613	37	1
ENSMUSG00000037622	4	133292459	133353481	27	1
ENSMUSG00000037643	3	30995747	31052959	25	1
ENSMUSG00000037685	5	67618140	67847432	59	1
ENSMUSG00000037703	2	130632839	130642803	8	1
ENSMUSG00000037706	7	143052739	143067934	15	1
ENSMUSG00000037754	2	158665398	158766334	16	1
ENSMUSG00000037852	8	64592558	64693040	9	2
ENSMUSG00000037855	10	67886103	67912662	10	1
ENSMUSG00000037872 ENSMUSG00000005338	1	173331886	173367695	29	2
ENSMUSG00000037902	2	129592835	129632228	33	1
ENSMUSG00000037933	13	49341549	49387025	11	1
ENSMUSG00000037996	4	86983124	87230477	27	3
ENSMUSG00000038028	6	127085116	127109550	6	1
ENSMUSG00000038084	16	29579334	29654884	45	3
ENSMUSG00000038187	7	113315626	113369392	20	1
ENSMUSG00000038331	1	56793981	56978650	21	1
ENSMUSG00000038429	6	124815019	124829484	42	2
ENSMUSG00000038453	11	97509340	97575226	29	1
ENSMUSG00000038486	3	96181151	96195521	15	1
ENSMUSG00000038506	8	13255963	13288126	7	1
ENSMUSG00000038555	18	34840589	34847463	8	1
ENSMUSG00000038615	11	96817414	96829968	26	2
ENSMUSG00000038664	9	66350450	66508775	96	1
ENSMUSG00000038696	2	34406771	34624950	34	1
ENSMUSG00000038738	7	44310253	44358351	37	1
ENSMUSG00000038902	3	94837567	94882326	35	1
ENSMUSG00000039000	5	29569242	29676077	23	1
ENSMUSG00000039100	15	31455899	31531037	26	4
ENSMUSG00000039114	13	36725625	36734477	5	4
ENSMUSG00000039126	19	16956118	17223932	20	1
ENSMUSG00000039159	6	30211289	30304539	13	1
ENSMUSG00000039202	7	79273201	79365508	14	1
ENSMUSG00000039262	2	32151082	32234537	53	3
ENSMUSG00000039478	8	40307458	40386308	18	1
ENSMUSG00000039530	8	39005867	39165112	11	1
ENSMUSG00000039542	9	49502136	49798925	34	4
ENSMUSG00000039682	5	45493374	45512674	21	1
ENSMUSG00000039716 ENSMUSG00000092963	9	106892825	107231909	78	1
ENSMUSG00000039953	4	149586468	149648899	25	1
ENSMUSG00000040118	5	15934691	16374511	48	4
ENSMUSG00000040225	1	162670725	162740556	67	2
ENSMUSG00000040249	10	127538161	127621148	111	5
ENSMUSG00000040260	17	49456022	49564337	26	1
ENSMUSG00000040265	1	161982453	162478034	44	2
ENSMUSG00000040276	17	27655509	27711106	19	2
ENSMUSG00000040289	3	8663359	8667256	13	1
ENSMUSG00000040537	5	8072352	8368160	49	1
ENSMUSG00000040596	1	166384622	166409863	18	1
ENSMUSG00000040640	14	27622442	28478537	16	2
ENSMUSG00000040687	2	91137360	91183837	81	1
ENSMUSG00000040731	5	134619880	134639348	7	1
ENSMUSG00000040785	16	94370618	94469222	101	3
ENSMUSG00000040907	7	24978167	25005957	31	1
ENSMUSG00000041028	14	37120444	37135322	10	3
ENSMUSG00000041096	X	152336852	152342425	17	2
ENSMUSG00000041236	13	18717292	18866809	29	1
ENSMUSG00000041298	5	148874332	148995223	33	1
ENSMUSG00000041670	1	22286251	22805724	46	2
ENSMUSG00000041720	16	17280351	17406314	79	2
ENSMUSG00000041977	3	87617559	87738034	51	1
ENSMUSG00000041992	12	117516479	117756978	28	3
ENSMUSG00000042063	12	116047724	116063360	10	1
ENSMUSG00000042066	1	132356315	132391281	15	1
ENSMUSG00000042197	1	33761545	33814595	32	1
ENSMUSG00000042208	11	23564961	23633639	37	1
ENSMUSG00000042350	12	84918148	84970900	36	1
ENSMUSG00000042429	1	134199223	134235431	13	2
ENSMUSG00000042453	5	21884454	22344702	83	1
ENSMUSG00000042492	7	127197465	127208468	21	1
ENSMUSG00000042557	9	57072040	57128366	35	1
ENSMUSG00000043067	9	24411776	24503140	36	1
ENSMUSG00000043384 ENSMUSG00000072969	X	135742733	135803474	24	3
ENSMUSG00000043670	10	81019589	81025662	4	1
ENSMUSG00000043857	11	116918863	116986948	25	1
ENSMUSG00000043940	5	101832956	102069921	86	2
ENSMUSG00000044060 ENSMUSG00000089798	5	107497378	107580596	41	1
ENSMUSG00000044308	2	69897246	70024013	61	2
ENSMUSG00000044340	1	106171752	106394250	20	1
ENSMUSG00000044647	2	65845767	66031546	21	1
ENSMUSG00000045038	17	86167785	86657919	26	2
ENSMUSG00000045193	10	80165985	80172786	23	1
ENSMUSG00000045790	5	52374651	52471543	12	1
ENSMUSG00000045973 ENSMUSG00000093185	4	45395923	45408766	14	1
ENSMUSG00000045983	16	20668313	20692884	75	4
ENSMUSG00000046062	1	133131143	133139783	4	2
ENSMUSG00000046178	6	8948431	9249032	7	1
ENSMUSG00000046434	15	103240432	103244955	11	1
ENSMUSG00000046722	3	95228732	95236409	15	1
ENSMUSG00000046785	9	111271929	111279097	5	2
ENSMUSG00000046844	8	114205612	114374071	17	1
ENSMUSG00000046985	5	44175164	44226606	14	1
ENSMUSG00000047126	11	86694351	86757565	43	4
ENSMUSG00000047215	5	65388364	65391443	30	1
ENSMUSG00000047459	2	155236533	155250277	13	8
ENSMUSG00000047539	1	182313102	182341629	15	1
ENSMUSG00000048076	11	59211412	59228270	7	2
ENSMUSG00000048307	15	36477668	36496791	5	1
ENSMUSG00000048701	10	70097121	70193200	15	1
ENSMUSG00000048960	1	10993465	11303681	55	1
ENSMUSG00000049044	2	71981240	72257474	50	2
ENSMUSG00000049354	11	106036872	106059324	9	2
ENSMUSG00000049775	X	167207093	167209315	8	3
ENSMUSG00000049866	1	88673125	88702221	6	2
ENSMUSG00000050144	3	88410498	88425139	10	1
ENSMUSG00000050379	X	36911326	36991794	18	1
ENSMUSG00000050608	4	139101814	139131113	11	4
ENSMUSG00000050821	16	20693282	20703048	13	1
ENSMUSG00000051177	2	134786159	135475258	41	1
ENSMUSG00000051234	9	96470937	96478675	8	2
ENSMUSG00000051853	15	98737621	98763214	9	1
ENSMUSG00000052155	2	48814109	48903269	13	2
ENSMUSG00000052296	7	4631501	4658950	24	1
ENSMUSG00000052456	8	85017934	85025278	7	1
ENSMUSG00000052459	16	44085402	44139705	28	8
ENSMUSG00000052560	15	90487482	90679432	28	1
ENSMUSG00000052572	7	91090706	92447003	42	3
ENSMUSG00000052852	6	71707561	71810710	7	2
ENSMUSG00000053024	1	132509427	132543256	39	1
ENSMUSG00000053199	9	51765337	51853856	26	1
ENSMUSG00000053310	9	37544492	37552904	7	1
ENSMUSG00000053819	3	126596302	126844913	65	4
ENSMUSG00000053825	10	106470310	106933467	34	1
ENSMUSG00000053838	11	6105691	6200415	10	1
ENSMUSG00000053877	7	127511983	127567054	71	1
ENSMUSG00000054280 ENSMUSG00000023452 ENSMUSG00000093574	5	32736301	32854256	43	2
ENSMUSG00000054452	10	81559494	81566362	7	1
ENSMUSG00000054728	13	42680623	43138526	47	2
ENSMUSG00000055022	15	92051165	92341967	29	1
ENSMUSG00000056201	19	5490485	5494029	6	1
ENSMUSG00000056222	13	57421195	57908314	20	1
ENSMUSG00000056258	15	65986387	66286224	19	1
ENSMUSG00000056429	6	72608432	72617000	4	2
ENSMUSG00000056537	X	103957163	103981284	7	1
ENSMUSG00000056553	12	116485720	117276849	32	2
ENSMUSG00000056579 ENSMUSG00000098503 ENSMUSG00000098265 ENSMUSG00000098948 ENSMUSG00000099081	11	3639785	3649673	21	2
ENSMUSG00000056770	12	108106431	108179314	28	2
ENSMUSG00000057133	2	160946978	161109075	60	1
ENSMUSG00000057236	4	129307100	129335370	21	2
ENSMUSG00000057335	1	176733653	176814067	49	1
ENSMUSG00000057411	17	25790508	25792284	5	1
ENSMUSG00000057455	18	30973489	31317290	11	3
ENSMUSG00000057666	6	125161715	125166467	37	10
ENSMUSG00000057715	1	11414105	11975901	30	2
ENSMUSG00000057880	16	8513429	8621568	28	1
ENSMUSG00000058153	5	112419151	112577198	18	2
ENSMUSG00000058297	10	60106219	60135198	15	1
ENSMUSG00000058600 ENSMUSG00000065899	15	34440505	34443640	18	1
ENSMUSG00000058655	15	102073773	102097172	15	2
ENSMUSG00000058690	14	36874936	36968777	31	1
ENSMUSG00000058799	10	111473192	111498142	19	1
ENSMUSG00000059208 ENSMUSG00000079557	17	33646233	33718670	58	1
ENSMUSG00000059248	11	117199661	117362325	30	2
ENSMUSG00000059495	9	42963842	43105718	46	1
ENSMUSG00000059714	17	35823230	35832791	35	2
ENSMUSG00000059923	11	115644045	115708597	13	1
ENSMUSG00000059974	9	28994750	29963141	29	2
ENSMUSG00000060261	5	134237834	134314760	79	1
ENSMUSG00000060373	14	52073380	52104028	10	1
ENSMUSG00000060450	18	38296635	38317847	11	1
ENSMUSG00000060475	17	12966796	12992546	21	1
ENSMUSG00000060743	1	180800832	180813943	18	1
ENSMUSG00000060938	11	68901583	68906989	15	1
ENSMUSG00000061244	14	49012146	49066653	30	1
ENSMUSG00000061576	5	26817203	27727505	41	2
ENSMUSG00000061751	16	33974258	34573532	101	1
ENSMUSG00000061904	10	91116574	91124059	29	2
ENSMUSG00000061981	11	78037931	78060434	16	1
ENSMUSG00000062014	14	46808149	46822242	12	2
ENSMUSG00000062044	7	45783738	45804144	33	1
ENSMUSG00000062203	16	11219292	11254270	23	1
ENSMUSG00000062232	3	79062516	79286517	42	1
ENSMUSG00000062257	9	27790775	28925410	24	1
ENSMUSG00000062270	9	90091665	90114774	37	1
ENSMUSG00000062590 ENSMUSG00000094638 ENSMUSG00000026229	1	86064387	86278284	91	2
ENSMUSG00000062762	9	36779159	36797361	27	1
ENSMUSG00000063063	6	76881637	77979699	29	1
ENSMUSG00000063065	7	126759601	126765819	16	1
ENSMUSG00000063077	4	149176319	149307693	72	9
ENSMUSG00000063253	8	83434493	83458391	5	2
ENSMUSG00000063273	3	51415148	51476507	40	1
ENSMUSG00000063297	7	54835959	55265366	12	1
ENSMUSG00000063358	16	16983382	17047453	24	5
ENSMUSG00000063524	4	150236721	150248879	35	3
ENSMUSG00000063659	1	177442351	177450764	32	3
ENSMUSG00000063801	7	79875332	79920640	6	1
ENSMUSG00000063870 ENSMUSG00000098762	6	125095981	125130591	55	2
ENSMUSG00000064329	2	66270781	66440840	43	1
ENSMUSG00000064725 ENSMUSG00000020372 ENSMUSG00000064500 ENSMUSG00000064780	11	48800332	48806434	29	1
ENSMUSG00000064829 ENSMUSG00000065295 ENSMUSG00000062647	2	26910764	26913318	23	3
ENSMUSG00000065452 ENSMUSG00000028410	4	40722150	40737149	32	1
ENSMUSG00000066232	7	110018425	110055114	25	1
ENSMUSG00000066392	12	88722876	90334935	50	1
ENSMUSG00000066441	12	79174337	79192293	11	1
ENSMUSG00000066551	5	149046702	149053513	24	1
ENSMUSG00000066621	5	144194442	144223615	50	1
ENSMUSG00000067578	2	172036233	172043466	3	1
ENSMUSG00000067629	17	26941384	26972434	27	1
ENSMUSG00000067879	1	9601199	9627143	6	1
ENSMUSG00000067889	19	4711208	4752353	37	1
ENSMUSG00000068039 ENSMUSG00000065105	17	12915701	12925067	33	1
ENSMUSG00000068373	2	104143073	104410334	36	2
ENSMUSG00000068748	6	22875502	23052916	30	1
ENSMUSG00000068923	3	88744700	88775164	14	1
ENSMUSG00000069601	10	69533772	70027438	128	2
ENSMUSG00000069769	11	88339382	88718513	27	1
ENSMUSG00000070570	7	45163921	45176138	12	1
ENSMUSG00000070880	2	70553072	70602014	32	1
ENSMUSG00000071072	10	128058954	128077272	12	1
ENSMUSG00000071533	16	56007245	56029739	20	4
ENSMUSG00000071650	19	8898090	8916663	25	1
ENSMUSG00000072235	15	98949841	98953551	11	1
ENSMUSG00000072825	12	112722174	112746591	27	1
ENSMUSG00000073174 ENSMUSG00000040003	5	19227046	20706052	34	1
ENSMUSG00000074457	3	90537254	90543151	20	2
ENSMUSG00000074657	10	127225696	127263363	29	2
ENSMUSG00000077185 ENSMUSG00000077564 ENSMUSG00000041453	5	146832890	146837032	20	8
ENSMUSG00000077221 ENSMUSG00000040549	2	91526762	91620664	62	2
ENSMUSG00000078517 ENSMUSG00000066036	4	139352587	139489588	156	1
ENSMUSG00000078676 ENSMUSG00000052915	11	98795516	98833814	42	1
ENSMUSG00000078812	11	69916714	69921958	25	2
ENSMUSG00000078816	7	3303532	3331094	20	1
ENSMUSG00000079157	8	9206001	9771018	3	3
ENSMUSG00000079415 ENSMUSG00000024695	19	12763660	12796126	18	2
ENSMUSG00000079477	6	87999106	88045270	15	1
ENSMUSG00000080441 ENSMUSG00000036046	15	84943936	84988551	19	1
ENSMUSG00000084708 ENSMUSG00000065862 ENSMUSG00000059796	11	69666936	69672423	42	2
ENSMUSG00000084899 ENSMUSG00000020048 ENSMUSG00000092686	10	86690209	86705509	32	2
ENSMUSG00000086968	3	107888850	107896213	33	1
ENSMUSG00000086992 ENSMUSG00000051359	15	37366175	37792570	45	1
ENSMUSG00000087503 ENSMUSG00000017740	2	164960802	164999727	36	2
ENSMUSG00000089706 ENSMUSG00000026335	1	97795114	98095646	72	1
ENSMUSG00000089715 ENSMUSG00000089837 ENSMUSG00000022421	15	79786352	79834688	31	1
ENSMUSG00000089857 ENSMUSG00000066880	8	71908608	71934629	14	1
ENSMUSG00000090841	10	128490860	128493875	6	1
ENSMUSG00000091896	18	35771559	35807172	11	1
ENSMUSG00000092232 ENSMUSG00000022194 ENSMUSG00000089682	14	54883377	54898169	42	2
ENSMUSG00000092870 ENSMUSG00000020349	11	52098681	52127778	11	1
ENSMUSG00000092896 ENSMUSG00000025892	9	4417899	4796234	21	1
ENSMUSG00000093206 ENSMUSG00000001986	X	41400854	41678601	37	1
ENSMUSG00000093219 ENSMUSG00000025261	X	151800807	151935417	135	1
ENSMUSG00000093226 ENSMUSG00000033981	3	80681450	80802835	35	1
ENSMUSG00000093392 ENSMUSG00000028124	3	122245557	122269984	20	1
ENSMUSG00000093930	13	119690462	119708086	10	2
ENSMUSG00000095041	JH584304.1	52190	59690	11	1
ENSMUSG00000096764 ENSMUSG00000027130 ENSMUSG00000027132	2	112265825	112414240	57	2
ENSMUSG00000097545 ENSMUSG00000092972 ENSMUSG00000065597	14	64587331	64593961	15	1
ENSMUSG00000097767 ENSMUSG00000099235 ENSMUSG00000099010 ENSMUSG00000098599 ENSMUSG00000098395	5	112213228	112229395	30	1
ENSMUSG00000098371 ENSMUSG00000022601 ENSMUSG00000098274	16	55966275	56008913	26	2
ENSMUSG00000098543 ENSMUSG00000092274 ENSMUSG00000098974 ENSMUSG00000098986	19	5824708	5845478	17	1
ENSMUSG00000098550 ENSMUSG00000000740 ENSMUSG00000064450	8	123102350	123105244	14	2
ENSMUSG00000098606 ENSMUSG00000026463	1	133699457	133801041	38	1
ENSMUSG00000098652 ENSMUSG00000060657	16	14109166	14159274	29	2
ENSMUSG00000099112 ENSMUSG00000056851	15	102470632	102500059	17	1
ENSMUSG00000099225 ENSMUSG00000034613	10	122678762	122945795	25	1
ENSMUSG00000099703 ENSMUSG00000065649 ENSMUSG00000088059 ENSMUSG00000037236 ENSMUSG00000097769	18	35553371	35593835	82	7
ENSMUSG00000102351 ENSMUSG00000055447	16	49855618	49915010	16	1
ENSMUSG00000102627 ENSMUSG00000095100 ENSMUSG00000089375 ENSMUSG00000102252 ENSMUSG00000100826 ENSMUSG00000094890 ENSMUSG00000000948 ENSMUSG00000077191	7	59307924	60140219	114	1
ENSMUSG00000102976 ENSMUSG00000094410 ENSMUSG00000102049	1	133619862	133661380	53	1
ENSMUSG00000104063 ENSMUSG00000103472 ENSMUSG00000102828 ENSMUSG00000103770 ENSMUSG00000103677 ENSMUSG00000103458 ENSMUSG00000103144 ENSMUSG00000102836 ENSMUSG00000103255 ENSMUSG00000103793 ENSMUSG00000104318 ENSMUSG00000104252 ENSMUSG00000103567 ENSMUSG00000102697 ENSMUSG00000103092 ENSMUSG00000023036 ENSMUSG00000103800 ENSMUSG00000102748 ENSMUSG00000103601 ENSMUSG00000103585 ENSMUSG00000103442 …	18	36930184	37841873	126	2

## Sheet: CON_exGF
geneID	chr	start	end	total_exons	exon_changes
ENSMUSG00000002658	17	57003405	57011288	13	1
ENSMUSG00000006057	11	96068852	96075670	12	1
ENSMUSG00000007415	5	3632932	3647934	10	1
ENSMUSG00000018659	11	96937825	96943986	11	1
ENSMUSG00000019370	7	16915379	16924114	16	1
ENSMUSG00000019897	10	105841067	105847833	8	1
ENSMUSG00000020022	10	94198955	94221443	11	3
ENSMUSG00000020955	12	51690966	51738939	6	1
ENSMUSG00000021794	14	34310727	34345144	21	1
ENSMUSG00000023004	15	98931425	98934565	7	1
ENSMUSG00000025290	14	24490681	24496146	6	2
ENSMUSG00000026083	1	37998010	38055579	35	1
ENSMUSG00000026458	1	134296783	134332928	39	1
ENSMUSG00000027737	3	49892526	50443614	21	1
ENSMUSG00000027940	3	90072649	90100902	42	3
ENSMUSG00000027966	3	114030540	114220718	76	1
ENSMUSG00000028452	4	42979963	43000507	27	1
ENSMUSG00000029176	5	52834015	52867797	47	1
ENSMUSG00000029538	5	115327177	115333080	11	1
ENSMUSG00000029708	6	28416091	28428390	9	1
ENSMUSG00000031657	8	88137855	88172027	23	1
ENSMUSG00000031696	8	85260397	85299513	17	1
ENSMUSG00000032549	9	103111787	103185276	10	1
ENSMUSG00000032570	9	105403539	105527319	70	1
ENSMUSG00000032580	9	107740371	107770996	80	1
ENSMUSG00000033186	14	99034544	99046136	3	2
ENSMUSG00000035299	X	169685199	170005736	36	1
ENSMUSG00000037270	3	36863106	37053033	129	1
ENSMUSG00000038615	11	96817414	96829968	26	1
ENSMUSG00000042063	12	116047724	116063360	10	1
ENSMUSG00000043091	15	99029891	99038105	4	2
ENSMUSG00000050967	1	39618406	39651474	4	1
ENSMUSG00000053253	14	105258573	105309298	22	1
ENSMUSG00000056258	15	65986387	66286224	19	1
ENSMUSG00000056770	12	108106431	108179314	28	1
ENSMUSG00000057715	1	11414105	11975901	30	1
ENSMUSG00000058402	7	29859979	29877292	13	1
ENSMUSG00000060073	12	70974621	70996347	28	1
ENSMUSG00000060152	5	115235836	115245351	21	1
ENSMUSG00000062270	9	90091665	90114774	37	1
ENSMUSG00000064829 ENSMUSG00000065295 ENSMUSG00000062647	2	26910764	26913318	23	1
ENSMUSG00000074280	9	57483913	57484585	2	2
ENSMUSG00000077185 ENSMUSG00000077564 ENSMUSG00000041453	5	146832890	146837032	20	3
ENSMUSG00000078490	4	155409190	155466823	60	1
ENSMUSG00000078700	11	96916270	96965060	19	4
ENSMUSG00000082286	11	3125904	3131004	15	1
ENSMUSG00000092448	6	110639753	110645916	3	1
ENSMUSG00000093226 ENSMUSG00000033981	3	80681450	80802835	35	1
ENSMUSG00000095041	JH584304.1	52190	59690	11	1
ENSMUSG00000101214 ENSMUSG00000056536	1	105382260	105663677	60	2
ENSMUSG00000104492 ENSMUSG00000037509	1	34678188	34813309	34	1

## Sheet: GF_exGF
geneID	chr	start	end	total_exons	exon_changes
ENSMUSG00000000538	11	60226714	60352905	28	2
ENSMUSG00000000804	11	84984442	85140161	50	1
ENSMUSG00000000838 ENSMUSG00000098736	X	68678485	68717963	37	1
ENSMUSG00000001227	17	56123085	56140343	18	1
ENSMUSG00000001472	8	123373824	123404173	20	1
ENSMUSG00000001576	17	26561489	26656931	24	2
ENSMUSG00000002107	2	6539694	7509563	70	1
ENSMUSG00000002222	6	71388634	71440637	18	1
ENSMUSG00000002319 ENSMUSG00000002320	14	55625400	55643806	98	1
ENSMUSG00000002372	17	56673225	56711769	16	3
ENSMUSG00000003131	9	45965311	45984871	6	2
ENSMUSG00000003273	7	45699843	45704682	13	2
ENSMUSG00000003316	8	111154421	111259216	34	1
ENSMUSG00000003360	15	98645134	98662889	30	3
ENSMUSG00000003429	7	45122388	45124389	5	1
ENSMUSG00000003657	8	110142539	110168206	11	1
ENSMUSG00000003721	1	121304353	121332589	36	1
ENSMUSG00000003731	4	129643980	129672767	23	1
ENSMUSG00000003814	8	84841850	84846934	17	1
ENSMUSG00000004207	10	60277627	60302597	21	1
ENSMUSG00000004892	3	87987531	88000230	23	1
ENSMUSG00000005103	5	38526814	38561666	15	3
ENSMUSG00000005505	2	90904740	90911626	13	1
ENSMUSG00000005610 ENSMUSG00000088948	7	111070568	111083030	54	1
ENSMUSG00000005621	7	80993681	81045164	18	1
ENSMUSG00000006005	1	150392838	150449935	81	1
ENSMUSG00000006423	X	36823737	36874111	21	1
ENSMUSG00000006800	2	166073089	166155663	35	1
ENSMUSG00000007564	17	20945311	20965916	31	3
ENSMUSG00000007617	13	93303757	93404129	27	1
ENSMUSG00000007850	11	50376990	50386528	48	6
ENSMUSG00000008153	6	124430759	124464794	30	1
ENSMUSG00000009394	6	115134902	115282626	14	1
ENSMUSG00000009569	16	13256481	13417529	24	3
ENSMUSG00000009575	15	103191544	103239816	13	1
ENSMUSG00000010095	19	8706882	8723369	11	1
ENSMUSG00000010392	11	76726602	76763579	10	1
ENSMUSG00000011382	7	45472956	45488805	9	1
ENSMUSG00000013662	19	32672563	32712298	10	1
ENSMUSG00000014077	2	119547697	119587027	15	1
ENSMUSG00000014551	6	92169525	92184033	8	1
ENSMUSG00000014602	1	93015464	93101951	75	1
ENSMUSG00000014956	5	32458974	32517433	14	1
ENSMUSG00000015090	2	25466709	25470046	16	1
ENSMUSG00000015120	17	25261916	25274622	35	1
ENSMUSG00000015222	1	66175273	66442583	68	1
ENSMUSG00000015291	X	74304998	74311862	34	1
ENSMUSG00000015501	10	13966075	14151374	23	1
ENSMUSG00000015733	6	17636234	17666972	26	1
ENSMUSG00000016382	X	75785654	75875182	26	1
ENSMUSG00000017119 ENSMUSG00000099023	11	101552149	101581951	59	1
ENSMUSG00000017132	11	118132019	118248592	25	1
ENSMUSG00000017144	2	51130438	51149111	10	1
ENSMUSG00000017781	11	75588097	75628804	24	2
ENSMUSG00000018326	2	163994960	164018588	8	2
ENSMUSG00000018411	11	104231390	104332090	36	3
ENSMUSG00000018481	11	85187262	85235130	13	1
ENSMUSG00000018541	11	97745481	97766556	16	1
ENSMUSG00000018567	11	69991143	69994951	12	1
ENSMUSG00000018707	12	110601452	110666945	92	1
ENSMUSG00000018849	11	35838400	35980527	27	1
ENSMUSG00000019087	X	74297097	74304721	35	3
ENSMUSG00000019210	6	120795245	120822685	9	1
ENSMUSG00000019370	7	16915379	16924114	16	2
ENSMUSG00000019874	10	57784881	57788450	6	3
ENSMUSG00000019923	10	72654845	72674964	20	8
ENSMUSG00000020111	10	59702477	59864132	38	1
ENSMUSG00000020153	10	80249121	80256794	22	1
ENSMUSG00000020176	11	11930508	12038683	28	1
ENSMUSG00000020180	10	75517551	75537373	6	3
ENSMUSG00000020277	10	77986947	78010083	27	2
ENSMUSG00000020423	1	134075170	134079120	2	1
ENSMUSG00000020524	11	57011387	57330244	26	1
ENSMUSG00000020598	12	44328885	44601846	32	2
ENSMUSG00000020668	12	3365132	3406494	8	1
ENSMUSG00000020719 ENSMUSG00000093273 ENSMUSG00000093133	11	106780355	106789185	40	1
ENSMUSG00000020720	11	107479484	107504362	15	3
ENSMUSG00000020792	11	116288001	116307233	35	1
ENSMUSG00000020840	11	76924809	76987379	32	1
ENSMUSG00000020850	11	75486816	75509449	49	1
ENSMUSG00000020863	11	94287890	94321988	33	1
ENSMUSG00000020886	11	70017085	70045532	46	2
ENSMUSG00000020946	11	103676849	103697898	10	1
ENSMUSG00000020978	12	69296681	69310687	21	5
ENSMUSG00000021037	12	87266746	87273997	9	1
ENSMUSG00000021039	12	87449936	87472299	14	1
ENSMUSG00000021068	12	70011435	70111925	37	1
ENSMUSG00000021097	12	104763114	104865076	14	1
ENSMUSG00000021130	12	80518990	80603896	15	1
ENSMUSG00000021242	12	84754560	84773112	4	1
ENSMUSG00000021266	12	108860030	108894174	23	1
ENSMUSG00000021288	12	111758849	111807844	34	4
ENSMUSG00000021313	13	11553103	12106945	107	1
ENSMUSG00000021373	13	46501848	46649642	18	1
ENSMUSG00000021395	13	51100880	51152546	6	1
ENSMUSG00000021488	13	55209782	55318325	23	2
ENSMUSG00000021520	13	66900617	66905378	6	1
ENSMUSG00000021660	13	98309896	98317006	15	6
ENSMUSG00000021670	13	96648967	96670936	45	2
ENSMUSG00000021939	14	63122462	63145919	10	4
ENSMUSG00000022037	14	65968483	65981548	26	2
ENSMUSG00000022044	14	66344296	66361680	24	1
ENSMUSG00000022136	14	118937932	118981702	12	2
ENSMUSG00000022139	14	120275669	120431697	9	2
ENSMUSG00000022151	15	5185525	5218336	12	1
ENSMUSG00000022223	14	55897286	55900232	6	1
ENSMUSG00000022270	15	25843264	25973687	12	1
ENSMUSG00000022338	15	44428111	44437685	5	1
ENSMUSG00000022362 ENSMUSG00000022361 ENSMUSG00000101892	15	58022259	58076541	40	1
ENSMUSG00000022454	15	95219451	95528706	23	2
ENSMUSG00000022536	16	5013906	5049910	17	1
ENSMUSG00000022607	15	73205105	73423191	34	1
ENSMUSG00000022761	16	17508688	17526333	47	1
ENSMUSG00000022762	16	81200697	81624285	19	1
ENSMUSG00000022789	16	16312235	16359030	21	2
ENSMUSG00000022884 ENSMUSG00000064382 ENSMUSG00000064880 ENSMUSG00000088524 ENSMUSG00000087935 ENSMUSG00000065208	16	23107444	23114136	71	1
ENSMUSG00000022973	16	90936092	91011308	54	1
ENSMUSG00000022982	16	90220742	90226322	5	1
ENSMUSG00000023150	1	151344477	151364422	24	1
ENSMUSG00000023456	6	124810586	124814296	18	1
ENSMUSG00000023495	9	106453291	106464012	54	1
ENSMUSG00000023852	17	15704967	15772610	46	1
ENSMUSG00000024002	17	32196274	32284722	33	1
ENSMUSG00000024104	6	116208033	116262668	31	1
ENSMUSG00000024122	17	24073680	24150924	36	1
ENSMUSG00000024127	17	85063477	85090267	15	1
ENSMUSG00000024268	18	25477632	25753983	14	3
ENSMUSG00000024392	17	35135178	35147322	63	1
ENSMUSG00000024580	18	61712440	61726331	4	1
ENSMUSG00000024587	18	64499665	64516557	15	2
ENSMUSG00000024617	18	60925618	60988152	30	3
ENSMUSG00000024639	19	16132831	16387463	11	1
ENSMUSG00000024640	19	15904678	15947337	22	1
ENSMUSG00000024781	19	34492318	34527474	11	1
ENSMUSG00000024851	19	4099998	4113965	50	2
ENSMUSG00000024924	19	27216484	27254231	35	1
ENSMUSG00000024935	19	28835049	28913960	20	1
ENSMUSG00000025085	19	57032733	57314919	69	1
ENSMUSG00000025217	19	45363734	45533341	15	1
ENSMUSG00000025240	9	123529882	123592598	20	1
ENSMUSG00000025268	X	150806370	150814345	36	1
ENSMUSG00000025290	14	24490681	24496146	6	1
ENSMUSG00000025369	10	128459236	128490173	30	1
ENSMUSG00000025373	10	128411616	128441438	9	2
ENSMUSG00000025393	10	128083273	128090391	29	3
ENSMUSG00000025428	18	77773729	77782869	24	4
ENSMUSG00000025484	7	140853384	140856383	4	1
ENSMUSG00000025510	7	141467362	141471479	10	1
ENSMUSG00000025757	3	40744495	40796103	34	2
ENSMUSG00000025777	1	17145362	17164271	16	2
ENSMUSG00000025781	2	10056016	10080510	25	5
ENSMUSG00000025854	5	138754514	138810077	19	1
ENSMUSG00000025867	13	54371349	54383917	4	2
ENSMUSG00000025917	1	10024601	10038168	22	4
ENSMUSG00000025980	1	55077835	55088243	15	1
ENSMUSG00000026034	1	58410189	58424066	33	1
ENSMUSG00000026123	1	34849976	34879580	16	3
ENSMUSG00000026131 ENSMUSG00000103888 ENSMUSG00000103405	1	33908225	34308661	145	1
ENSMUSG00000026223	1	85894281	85908675	10	1
ENSMUSG00000026361	1	143598800	143702893	25	1
ENSMUSG00000026421	1	135720061	135752232	7	1
ENSMUSG00000026436 ENSMUSG00000026435 ENSMUSG00000100037	1	131962954	132032612	33	1
ENSMUSG00000026437	1	132112237	132139684	27	1
ENSMUSG00000026473 ENSMUSG00000099227	1	153899926	153909723	17	1
ENSMUSG00000026484	1	151458004	151500955	21	1
ENSMUSG00000026576	1	164437109	164458355	11	1
ENSMUSG00000026782	1	60409619	60481158	36	1
ENSMUSG00000026811	2	32599709	32620806	29	1
ENSMUSG00000026825	2	32308471	32353329	50	1
ENSMUSG00000026827	2	57237635	57370719	28	1
ENSMUSG00000026830	2	58045113	58052864	3	2
ENSMUSG00000026860	2	30344809	30359337	39	2
ENSMUSG00000026904	2	62046462	62326730	37	2
ENSMUSG00000027087	2	83724397	83806916	46	1
ENSMUSG00000027104 ENSMUSG00000099302	2	73816509	73892639	47	2
ENSMUSG00000027199	2	122594467	122611303	14	2
ENSMUSG00000027244	2	91674618	91710576	29	1
ENSMUSG00000027245 ENSMUSG00000074884	2	121449195	121458672	35	1
ENSMUSG00000027291	2	120316461	120353137	48	1
ENSMUSG00000027347	2	117279993	117343001	25	1
ENSMUSG00000027405 ENSMUSG00000065289 ENSMUSG00000093645 ENSMUSG00000065287 ENSMUSG00000065272	2	130274430	130279313	68	6
ENSMUSG00000027438	2	148693985	148732467	15	2
ENSMUSG00000027447	2	148871722	148875692	8	1
ENSMUSG00000027506	3	8925593	9004723	29	1
ENSMUSG00000027522	2	174076308	174099771	22	2
ENSMUSG00000027546	2	168634438	168742409	48	1
ENSMUSG00000027577	2	181018380	181043546	14	1
ENSMUSG00000027677 ENSMUSG00000104357	3	33800195	33816634	16	1
ENSMUSG00000027692	3	28263214	28675858	55	1
ENSMUSG00000027797	3	55242526	55539064	21	2
ENSMUSG00000027799	3	55625205	56183701	58	1
ENSMUSG00000028059	3	88607454	88648052	92	1
ENSMUSG00000028086	3	84815268	84979198	23	1
ENSMUSG00000028136	3	94497550	94582702	14	1
ENSMUSG00000028161	3	136670124	136937727	25	1
ENSMUSG00000028249	4	6365650	6408423	25	1
ENSMUSG00000028484	4	83455680	83486459	28	1
ENSMUSG00000028530	4	101152367	101265282	43	1
ENSMUSG00000028603	4	108043839	108144998	34	1
ENSMUSG00000028619	4	107134155	107179116	25	1
ENSMUSG00000028646	4	123917446	123936997	16	1
ENSMUSG00000028649	4	123349633	123684360	140	1
ENSMUSG00000028821	4	134930898	134937548	12	1
ENSMUSG00000028869	4	125016585	125055380	28	1
ENSMUSG00000028926	5	4803391	5420312	44	1
ENSMUSG00000028931 ENSMUSG00000089757	4	152390742	152477871	47	1
ENSMUSG00000028964	4	150897133	150914437	28	5
ENSMUSG00000029064	4	155491361	155559269	27	1
ENSMUSG00000029103	5	35091490	35105766	22	2
ENSMUSG00000029106 ENSMUSG00000099082	5	34573664	34632308	46	2
ENSMUSG00000029203	5	65537233	65598988	16	1
ENSMUSG00000029227	5	74535449	74598790	36	1
ENSMUSG00000029245	5	84057791	84417382	28	1
ENSMUSG00000029334	5	98929773	99037351	29	1
ENSMUSG00000029405	5	92052146	92083735	16	1
ENSMUSG00000029430	5	129020069	129024323	11	1
ENSMUSG00000029432	5	129725063	129758327	19	1
ENSMUSG00000029461	7	100706651	100841628	11	1
ENSMUSG00000029581	5	142960343	142973185	17	1
ENSMUSG00000029602	5	120648812	120679597	30	1
ENSMUSG00000029649	5	147860628	147875778	6	1
ENSMUSG00000029726	5	137781906	137786715	10	1
ENSMUSG00000029769 ENSMUSG00000092956	6	29396309	29426994	38	1
ENSMUSG00000029776	6	52546228	52640389	12	1
ENSMUSG00000030057	6	87842615	87851106	17	1
ENSMUSG00000030172	6	119570796	119848167	48	1
ENSMUSG00000030451	7	56050155	56231794	95	1
ENSMUSG00000030519	7	64501706	64753870	22	1
ENSMUSG00000030557	7	67231163	67372858	26	1
ENSMUSG00000030605	7	79133769	79149060	10	1
ENSMUSG00000030655	7	118131308	118243637	73	1
ENSMUSG00000030663	7	116093301	116105210	12	3
ENSMUSG00000030701	7	100642892	100662414	27	2
ENSMUSG00000030718	7	100326737	100371896	14	1
ENSMUSG00000030774	7	97842935	97912381	15	1
ENSMUSG00000031144	X	7638471	7653256	18	1
ENSMUSG00000031157	X	7894519	7899269	19	1
ENSMUSG00000031299	X	160122209	160138413	16	1
ENSMUSG00000031342	X	166238911	166388988	15	1
ENSMUSG00000031422	X	136732942	136743690	25	3
ENSMUSG00000031425	X	136822671	136839733	14	1
ENSMUSG00000031584	8	33652523	33698163	17	1
ENSMUSG00000031592	8	41239759	41334086	38	1
ENSMUSG00000031633	8	46206797	46211284	6	1
ENSMUSG00000031748	8	93809966	93969388	30	1
ENSMUSG00000031778	8	94772009	94782423	10	3
ENSMUSG00000031834	8	70768176	70776713	31	1
ENSMUSG00000031840	8	70754679	70758677	15	1
ENSMUSG00000031988	9	27004503	27030094	6	2
ENSMUSG00000032036	9	34485894	35036716	34	1
ENSMUSG00000032076	9	47530173	47857637	26	1
ENSMUSG00000032249	9	62341293	62378812	27	1
ENSMUSG00000032253	9	82866159	82975516	75	1
ENSMUSG00000032329	9	56418644	56496884	10	1
ENSMUSG00000032356	9	89909908	90026977	34	3
ENSMUSG00000032393	9	65032458	65082650	23	1
ENSMUSG00000032418	9	86581371	86695953	21	1
ENSMUSG00000032503	9	112065091	112235938	81	1
ENSMUSG00000032580	9	107740371	107770996	80	7
ENSMUSG00000032589	9	108096022	108190384	15	1
ENSMUSG00000032595 ENSMUSG00000032594 ENSMUSG00000032596 ENSMUSG00000079323 ENSMUSG00000093456	9	107975505	108048782	157	1
ENSMUSG00000032826	3	126921606	127499259	113	4
ENSMUSG00000032966	2	151542483	151561692	27	1
ENSMUSG00000033105	10	76531588	76557138	39	1
ENSMUSG00000033208	10	76253853	76261159	3	1
ENSMUSG00000033450	17	7926000	7934897	10	1
ENSMUSG00000033862	8	123224841	123232250	13	5
ENSMUSG00000034009	3	79641611	79737880	24	1
ENSMUSG00000034088	1	93405940	93478815	48	2
ENSMUSG00000034160	X	101640060	101684351	38	2
ENSMUSG00000034187	11	103821782	103954056	38	1
ENSMUSG00000034211	5	129715497	129718875	30	3
ENSMUSG00000034488	13	88821472	89323223	24	1
ENSMUSG00000034557	4	108637466	108780798	22	1
ENSMUSG00000034656	8	84388440	84640246	67	1
ENSMUSG00000034781	10	81528724	81545190	11	1
ENSMUSG00000034799	8	71624417	71671757	64	1
ENSMUSG00000034940	11	83964428	84044578	40	1
ENSMUSG00000035242 ENSMUSG00000087993	10	80826656	80829290	26	5
ENSMUSG00000035247	12	51743722	51829536	48	2
ENSMUSG00000035268	2	163658386	163726158	21	4
ENSMUSG00000035357	6	101149609	101377897	16	1
ENSMUSG00000035798	10	110941782	111010066	19	1
ENSMUSG00000035864	10	108497650	109010982	23	1
ENSMUSG00000036309	11	52231995	52246858	17	1
ENSMUSG00000036327	2	26208637	26237525	16	1
ENSMUSG00000036438	17	87433412	87446935	11	3
ENSMUSG00000036766	1	84369839	84696221	18	1
ENSMUSG00000036966	15	102116528	102136234	17	3
ENSMUSG00000037032	7	105558483	105581653	55	1
ENSMUSG00000037058	18	35598617	35617186	20	1
ENSMUSG00000037111	3	51515319	51560879	14	2
ENSMUSG00000037669	12	8208107	8285758	9	1
ENSMUSG00000037872 ENSMUSG00000005338	1	173331886	173367695	29	2
ENSMUSG00000037876	10	67096125	67256326	47	1
ENSMUSG00000037894	3	137864487	137866922	23	1
ENSMUSG00000037902	2	129592835	129632228	33	1
ENSMUSG00000037916	19	4007497	4012806	35	1
ENSMUSG00000037996	4	86983124	87230477	27	2
ENSMUSG00000038028	6	127085116	127109550	6	1
ENSMUSG00000038034	1	172261641	172319841	24	1
ENSMUSG00000038084	16	29579334	29654884	45	1
ENSMUSG00000038244	7	112225856	112355194	37	1
ENSMUSG00000038324	2	155634271	155692384	42	1
ENSMUSG00000038412	9	121848560	121858000	4	1
ENSMUSG00000038453	11	97509340	97575226	29	3
ENSMUSG00000038884	9	20868642	20874307	18	1
ENSMUSG00000038914	2	180657964	180709999	26	1
ENSMUSG00000039159	6	30211289	30304539	13	1
ENSMUSG00000039262	2	32151082	32234537	53	1
ENSMUSG00000039630 ENSMUSG00000100725 ENSMUSG00000089788	1	178321108	178337797	34	1
ENSMUSG00000039704	15	9140621	9198318	18	1
ENSMUSG00000039782	5	43233463	43289724	20	1
ENSMUSG00000039953	4	149586468	149648899	25	2
ENSMUSG00000040289	3	8663359	8667256	13	1
ENSMUSG00000040446	18	24484962	24530204	7	1
ENSMUSG00000040479	2	91932824	91975864	57	1
ENSMUSG00000040722	9	57441328	57468024	7	2
ENSMUSG00000040731	5	134619880	134639348	7	1
ENSMUSG00000041028	14	37120444	37135322	10	3
ENSMUSG00000041096	X	152336852	152342425	17	1
ENSMUSG00000041298	5	148874332	148995223	33	1
ENSMUSG00000041607	18	82475146	82585637	31	2
ENSMUSG00000041670	1	22286251	22805724	46	2
ENSMUSG00000041740	5	115241412	115272898	38	1
ENSMUSG00000042429	1	134199223	134235431	13	1
ENSMUSG00000042520	3	89999589	90052475	33	1
ENSMUSG00000042682	14	29968308	29975074	7	1
ENSMUSG00000042699	1	153455758	153487660	49	1
ENSMUSG00000042700	12	82170016	82451782	25	2
ENSMUSG00000042744	5	121220219	121368577	89	1
ENSMUSG00000043733	5	121130533	121191397	23	2
ENSMUSG00000043940	5	101832956	102069921	86	1
ENSMUSG00000043962	4	126164082	126202760	54	1
ENSMUSG00000044071	10	123264076	123741204	6	1
ENSMUSG00000044477	17	30005087	30210019	5	1
ENSMUSG00000045180	X	152609509	152769465	23	1
ENSMUSG00000045967	2	21367542	21830547	13	1
ENSMUSG00000046434	15	103240432	103244955	11	1
ENSMUSG00000046785	9	111271929	111279097	5	1
ENSMUSG00000046844	8	114205612	114374071	17	2
ENSMUSG00000047126	11	86694351	86757565	43	1
ENSMUSG00000047459	2	155236533	155250277	13	8
ENSMUSG00000047694	X	98936316	98949017	19	1
ENSMUSG00000048307	15	36477668	36496791	5	1
ENSMUSG00000048799	18	53681724	53744547	21	1
ENSMUSG00000049148	15	4375491	4575553	6	2
ENSMUSG00000050144	3	88410498	88425139	10	1
ENSMUSG00000050565	1	156035403	156068861	21	1
ENSMUSG00000050608	4	139101814	139131113	11	2
ENSMUSG00000050967	1	39618406	39651474	4	1
ENSMUSG00000051285	1	7088920	7173628	20	1
ENSMUSG00000051319	2	127791388	127792488	2	2
ENSMUSG00000051403	7	19530967	19562398	13	1
ENSMUSG00000051674	5	73481002	73560794	34	1
ENSMUSG00000052155	2	48814109	48903269	13	3
ENSMUSG00000052419	6	13867735	13871518	11	1
ENSMUSG00000052459	16	44085402	44139705	28	7
ENSMUSG00000052516	16	73892306	74411825	47	1
ENSMUSG00000052534	1	168119364	168432270	22	1
ENSMUSG00000052560	15	90487482	90679432	28	1
ENSMUSG00000052889	7	122288751	122634402	26	1
ENSMUSG00000053581	5	139471211	139484549	17	1
ENSMUSG00000054387	1	132959484	133030561	41	3
ENSMUSG00000054728	13	42680623	43138526	47	2
ENSMUSG00000055022	15	92051165	92341967	29	1
ENSMUSG00000055204	5	90227190	90366185	36	2
ENSMUSG00000055817	17	83706163	83821516	33	4
ENSMUSG00000056429	6	72608432	72617000	4	1
ENSMUSG00000056553	12	116485720	117276849	32	1
ENSMUSG00000056602	5	150259930	150497752	61	1
ENSMUSG00000056629	19	6977741	6980461	8	1
ENSMUSG00000057230	6	86849517	86991864	26	1
ENSMUSG00000057715	1	11414105	11975901	30	1
ENSMUSG00000057914	2	14603088	14987908	48	1
ENSMUSG00000058153	5	112419151	112577198	18	1
ENSMUSG00000058297	10	60106219	60135198	15	1
ENSMUSG00000058589	10	89873509	90973300	95	1
ENSMUSG00000058594	2	11742573	11777582	43	2
ENSMUSG00000058756	11	98740638	98769006	27	1
ENSMUSG00000059119	7	143513579	143549090	16	1
ENSMUSG00000059146	7	78192362	78578408	29	1
ENSMUSG00000059213	15	98803782	98807925	2	2
ENSMUSG00000059456	14	66153257	66281052	44	1
ENSMUSG00000059482	4	10874498	10899425	16	1
ENSMUSG00000059811	17	79848392	79896123	14	1
ENSMUSG00000059923	11	115644045	115708597	13	1
ENSMUSG00000059974	9	28994750	29963141	29	2
ENSMUSG00000060373	14	52073380	52104028	10	1
ENSMUSG00000061477	12	28630847	28635953	7	1
ENSMUSG00000061751	16	33974258	34573532	101	2
ENSMUSG00000061904	10	91116574	91124059	29	2
ENSMUSG00000062044	7	45783738	45804144	33	1
ENSMUSG00000062232	3	79062516	79286517	42	1
ENSMUSG00000062270	9	90091665	90114774	37	4
ENSMUSG00000062376	19	46689906	46703382	5	1
ENSMUSG00000063077	4	149176319	149307693	72	4
ENSMUSG00000063358	16	16983382	17047453	24	4
ENSMUSG00000063659	1	177442351	177450764	32	3
ENSMUSG00000063801	7	79875332	79920640	6	1
ENSMUSG00000065947 ENSMUSG00000064363	MT	9877	11544	3	1
ENSMUSG00000067194	X	159372178	159389928	8	1
ENSMUSG00000067889	19	4711208	4752353	37	1
ENSMUSG00000069729	17	4994332	5347656	30	1
ENSMUSG00000069769	11	88339382	88718513	27	1
ENSMUSG00000070565	1	157135182	157412595	28	1
ENSMUSG00000070709	7	27907392	27929460	14	1
ENSMUSG00000070730	2	119137001	119157034	28	1
ENSMUSG00000071653 ENSMUSG00000071652 ENSMUSG00000096740	19	8883732	8897890	34	1
ENSMUSG00000071659	19	8819401	8834142	14	1
ENSMUSG00000074457	3	90537254	90543151	20	7
ENSMUSG00000074657	10	127225696	127263363	29	2
ENSMUSG00000078716	4	43668971	43692668	30	1
ENSMUSG00000079076 ENSMUSG00000021066	12	69893105	69969721	19	1
ENSMUSG00000079562	5	33335572	33373294	9	1
ENSMUSG00000084708 ENSMUSG00000065862 ENSMUSG00000059796	11	69666936	69672423	42	1
ENSMUSG00000084899 ENSMUSG00000020048 ENSMUSG00000092686	10	86690209	86705509	32	3
ENSMUSG00000084994 ENSMUSG00000031626	8	45507788	45827906	91	1
ENSMUSG00000085334 ENSMUSG00000028820	4	127021324	127049398	30	2
ENSMUSG00000086873 ENSMUSG00000025855	5	139017306	139150693	34	1
ENSMUSG00000089083 ENSMUSG00000072772 ENSMUSG00000004263	6	124739183	124756524	29	1
ENSMUSG00000089706 ENSMUSG00000026335	1	97795114	98095646	72	1
ENSMUSG00000089922 ENSMUSG00000020950	12	49382693	49407346	21	1
ENSMUSG00000090000 ENSMUSG00000025421	18	76930017	76972902	33	1
ENSMUSG00000090112	10	11149427	11217595	45	1
ENSMUSG00000092252 ENSMUSG00000092486 ENSMUSG00000072694	5	114808196	114823468	8	2
ENSMUSG00000092745 ENSMUSG00000028854	4	133369706	133423702	26	1
ENSMUSG00000093219 ENSMUSG00000025261	X	151800807	151935417	135	1
ENSMUSG00000093226 ENSMUSG00000033981	3	80681450	80802835	35	4
ENSMUSG00000093930	13	119690462	119708086	10	1
ENSMUSG00000096054	10	5020203	5550692	49	1
ENSMUSG00000096458 ENSMUSG00000091931 ENSMUSG00000041716 ENSMUSG00000096751 ENSMUSG00000057963 ENSMUSG00000098530 ENSMUSG00000100006	12	102568582	102758672	36	1
ENSMUSG00000097545 ENSMUSG00000092972 ENSMUSG00000065597	14	64587331	64593961	15	2
ENSMUSG00000097736	9	122572497	122679596	9	1
ENSMUSG00000098543 ENSMUSG00000092274 ENSMUSG00000098974 ENSMUSG00000098986	19	5824708	5845478	17	1
ENSMUSG00000098955 ENSMUSG00000062825 ENSMUSG00000093264	11	120345690	120348542	32	2
ENSMUSG00000102627 ENSMUSG00000095100 ENSMUSG00000089375 ENSMUSG00000102252 ENSMUSG00000100826 ENSMUSG00000094890 ENSMUSG00000000948 ENSMUSG00000077191	7	59307924	60140219	114	4
ENSMUSG00000102976 ENSMUSG00000094410 ENSMUSG00000102049	1	133619862	133661380	53	1
ENSMUSG00000103235 ENSMUSG00000098956 ENSMUSG00000104300 ENSMUSG00000032480	9	110084321	110115077	26	1

## Sheet: CON SI
geneID	chr	start	end	total_exons	exon_changes
ENSMUSG00000000538	11	60226714	60352905	28	1
ENSMUSG00000000563	3	105942698	105960099	18	1
ENSMUSG00000000787	X	13280970	13294052	29	2
ENSMUSG00000001289	15	102326116	102338139	47	3
ENSMUSG00000001380	18	36766530	36783205	13	3
ENSMUSG00000001525	17	35833921	35838306	12	1
ENSMUSG00000001576	17	26561489	26656931	24	2
ENSMUSG00000002102	2	91054009	91066369	34	1
ENSMUSG00000002107	2	6539694	7509563	70	1
ENSMUSG00000002329	14	55657879	55660508	6	1
ENSMUSG00000002985	7	19696109	19699166	25	2
ENSMUSG00000003031	6	134920401	134925513	4	1
ENSMUSG00000003234	16	20548577	20561379	30	1
ENSMUSG00000004056	7	27591552	27640826	45	1
ENSMUSG00000004071	16	4750348	4790292	17	1
ENSMUSG00000004207	10	60277627	60302597	21	2
ENSMUSG00000004364	1	80264923	80340480	28	2
ENSMUSG00000004771	9	64715299	64737758	24	1
ENSMUSG00000004865	17	28587648	28622521	30	2
ENSMUSG00000004937	10	81044075	81060178	12	1
ENSMUSG00000005045	4	152338651	152390194	49	1
ENSMUSG00000005371	17	87990859	88065291	29	2
ENSMUSG00000005534	8	3150922	3279617	23	1
ENSMUSG00000005871	18	34220924	34322189	32	1
ENSMUSG00000005873	18	34344889	34373415	5	1
ENSMUSG00000005936	17	28951950	28969549	20	1
ENSMUSG00000006005	1	150392838	150449935	81	1
ENSMUSG00000006273	8	69088646	69113711	26	3
ENSMUSG00000006673 ENSMUSG00000032604 ENSMUSG00000103970	9	108507713	108560163	107	1
ENSMUSG00000007097	1	172271709	172298064	28	1
ENSMUSG00000007617	13	93303757	93404129	27	12
ENSMUSG00000007682	12	90724554	90738438	2	1
ENSMUSG00000007891 ENSMUSG00000045777	7	142325837	142388038	30	2
ENSMUSG00000008892	8	22577075	22593813	10	1
ENSMUSG00000009394	6	115134902	115282626	14	1
ENSMUSG00000009535	18	68300355	68324852	27	1
ENSMUSG00000009905	1	106720459	106759727	15	1
ENSMUSG00000011256	11	46055992	46147343	28	1
ENSMUSG00000013033	8	83900105	83941954	40	3
ENSMUSG00000013089	16	22381309	22439719	23	1
ENSMUSG00000013236	17	56412431	56476483	38	1
ENSMUSG00000013921	7	30291672	30308367	28	2
ENSMUSG00000015002	15	65787034	65873816	45	2
ENSMUSG00000015087	2	25583018	25608521	35	1
ENSMUSG00000015165	7	28808541	28822266	40	1
ENSMUSG00000015189	6	4600840	4643381	24	1
ENSMUSG00000015671	13	14613242	14625671	8	1
ENSMUSG00000015766	6	137477245	137654876	50	1
ENSMUSG00000016346	2	181075579	181135291	48	1
ENSMUSG00000016559	11	116021912	116027962	14	1
ENSMUSG00000016921	2	162931528	162937121	15	1
ENSMUSG00000017009	2	164424247	164443887	7	1
ENSMUSG00000017119 ENSMUSG00000099023	11	101552149	101581951	59	1
ENSMUSG00000017376	11	78567168	78697373	20	1
ENSMUSG00000017631	11	76416734	76622314	46	1
ENSMUSG00000017843	12	110485739	110583061	14	1
ENSMUSG00000018474	11	69343273	69369406	58	1
ENSMUSG00000018548	11	87127077	87220683	29	1
ENSMUSG00000018707	12	110601452	110666945	92	2
ENSMUSG00000018765	11	69632990	69653297	28	1
ENSMUSG00000019194	7	31116524	31126945	9	2
ENSMUSG00000019302	11	101009452	101063719	40	1
ENSMUSG00000019370	7	16915379	16924114	16	1
ENSMUSG00000019906	10	107271843	107425143	7	1
ENSMUSG00000020032	10	84370905	84440597	9	1
ENSMUSG00000020333	11	54303798	54364756	50	2
ENSMUSG00000020402	11	52360860	52389397	18	2
ENSMUSG00000020456	11	6291633	6356642	38	1
ENSMUSG00000020458	11	29692947	29744331	24	1
ENSMUSG00000020598	12	44328885	44601846	32	1
ENSMUSG00000020627	12	5077472	5375682	14	1
ENSMUSG00000020658	12	3962554	4038915	23	1
ENSMUSG00000020823	11	117115168	117159268	28	1
ENSMUSG00000020894	11	69088490	69092384	16	4
ENSMUSG00000020923	11	102304560	102319742	42	1
ENSMUSG00000020926	11	102761439	102780262	44	1
ENSMUSG00000021051	12	75450883	75596200	14	1
ENSMUSG00000021071	12	70244539	70347614	15	2
ENSMUSG00000021076	12	70937857	70964718	13	1
ENSMUSG00000021241	12	84773270	84775089	4	1
ENSMUSG00000021244	12	84996321	85070515	36	1
ENSMUSG00000021314	13	18948371	19150913	21	3
ENSMUSG00000021377	13	47084775	47106201	20	1
ENSMUSG00000021595	13	69533746	69635780	35	1
ENSMUSG00000021660	13	98309896	98317006	15	2
ENSMUSG00000021687	13	94201310	94285857	16	2
ENSMUSG00000021693	13	106958996	107022126	37	1
ENSMUSG00000021704	13	92844787	92858230	9	1
ENSMUSG00000021745	14	11553532	12242041	42	1
ENSMUSG00000021767	14	21481434	21672478	47	1
ENSMUSG00000021870	14	26413168	26534931	55	2
ENSMUSG00000021895	14	27238039	27403904	11	1
ENSMUSG00000021936	14	33377898	33447158	31	1
ENSMUSG00000021987	14	60265205	60302370	14	1
ENSMUSG00000022008	14	76086232	76110815	8	1
ENSMUSG00000022195	15	12808177	12824657	9	1
ENSMUSG00000022329	15	34875496	35155806	18	1
ENSMUSG00000022387	15	88687300	88734233	24	1
ENSMUSG00000022390	15	81744848	81796269	23	1
ENSMUSG00000022412	15	80234080	80253366	10	1
ENSMUSG00000022443	15	77760587	77842175	54	2
ENSMUSG00000022587	15	74955051	74959905	39	1
ENSMUSG00000022607	15	73205105	73423191	34	1
ENSMUSG00000022661	16	45382135	45409053	27	1
ENSMUSG00000022884 ENSMUSG00000064382 ENSMUSG00000064880 ENSMUSG00000088524 ENSMUSG00000087935 ENSMUSG00000065208	16	23107444	23114136	71	2
ENSMUSG00000022961	16	91647506	91679221	42	1
ENSMUSG00000022973	16	90936092	91011308	54	1
ENSMUSG00000023927 ENSMUSG00000103779	17	51736187	51833290	42	1
ENSMUSG00000024073	17	74528295	74703356	122	2
ENSMUSG00000024096	17	65848433	65885755	11	1
ENSMUSG00000024346	18	36403679	36454495	4	1
ENSMUSG00000024359	18	34937414	34954357	26	1
ENSMUSG00000024392	17	35135178	35147322	63	2
ENSMUSG00000024425	18	38418975	38464399	8	1
ENSMUSG00000024431	18	39410545	39491301	25	1
ENSMUSG00000024454	18	37935844	37954988	25	1
ENSMUSG00000024500	18	42637432	43059471	22	2
ENSMUSG00000024617	18	60925618	60988152	30	1
ENSMUSG00000024750	19	21272278	21282289	17	1
ENSMUSG00000024810	19	29925114	29960718	17	1
ENSMUSG00000024991	19	60761116	60790693	22	1
ENSMUSG00000025228	19	46376814	46395735	11	2
ENSMUSG00000025290	14	24490681	24496146	6	4
ENSMUSG00000025369	10	128459236	128490173	30	5
ENSMUSG00000025422	10	127078907	127093169	19	1
ENSMUSG00000025531	X	113040593	113185517	22	2
ENSMUSG00000025555	14	121035200	121283744	33	1
ENSMUSG00000025576	11	118489762	118911597	31	2
ENSMUSG00000025658	X	157821436	158043294	25	2
ENSMUSG00000025781	2	10056016	10080510	25	2
ENSMUSG00000025856	5	138976014	138997370	21	1
ENSMUSG00000025969	1	62703285	62818695	22	1
ENSMUSG00000025982	1	54985169	55027481	43	1
ENSMUSG00000026034	1	58410189	58424066	33	1
ENSMUSG00000026109	1	50900647	51187270	20	1
ENSMUSG00000026127	1	34439851	34449356	26	1
ENSMUSG00000026131 ENSMUSG00000103888 ENSMUSG00000103405	1	33908225	34308661	145	3
ENSMUSG00000026234 ENSMUSG00000064837 ENSMUSG00000064696	1	86344719	86359400	31	1
ENSMUSG00000026341	1	125392905	125435727	34	8
ENSMUSG00000026353	1	128243964	128279378	20	1
ENSMUSG00000026442	1	132564690	132741797	51	1
ENSMUSG00000026490	1	179960472	180165603	74	3
ENSMUSG00000026571	1	165328698	165460475	31	1
ENSMUSG00000026576	1	164437109	164458355	11	3
ENSMUSG00000026643	2	3284212	3328877	22	1
ENSMUSG00000026797	2	32787602	32847239	27	1
ENSMUSG00000026825	2	32308471	32353329	50	2
ENSMUSG00000027002	2	80500512	80581380	41	2
ENSMUSG00000027108	2	73092801	73218924	21	1
ENSMUSG00000027193	2	94411682	94438136	22	1
ENSMUSG00000027248	2	121413775	121438687	19	1
ENSMUSG00000027255	2	91264974	91276931	28	1
ENSMUSG00000027273	2	136713453	136782428	13	1
ENSMUSG00000027363	2	126707328	126759297	26	1
ENSMUSG00000027419	2	143546156	143816285	14	2
ENSMUSG00000027438	2	148693985	148732467	15	1
ENSMUSG00000027500	3	8509360	8561606	12	1
ENSMUSG00000027573	2	180710117	180718733	9	1
ENSMUSG00000027634	2	156927345	156992056	40	2
ENSMUSG00000027663	3	32334792	32366014	15	1
ENSMUSG00000027692	3	28263214	28675858	55	1
ENSMUSG00000027797	3	55242526	55539064	21	1
ENSMUSG00000027799	3	55625205	56183701	58	1
ENSMUSG00000028035	3	152178511	152210279	15	1
ENSMUSG00000028086	3	84815268	84979198	23	2
ENSMUSG00000028152	3	138742195	138904433	26	3
ENSMUSG00000028161	3	136670124	136937727	25	2
ENSMUSG00000028399	4	75941238	78211961	82	1
ENSMUSG00000028484	4	83455680	83486459	28	1
ENSMUSG00000028524	4	102741297	102973628	55	2
ENSMUSG00000028527	4	101419277	101466995	19	1
ENSMUSG00000028603	4	108043839	108144998	34	1
ENSMUSG00000028773	4	130308595	130315463	4	1
ENSMUSG00000028785	4	129111570	129122036	20	1
ENSMUSG00000028796	4	128654702	128752881	41	1
ENSMUSG00000028945	5	24802823	24842624	12	3
ENSMUSG00000029110	5	34336289	34355629	31	1
ENSMUSG00000029126	5	38137193	38159467	5	1
ENSMUSG00000029152	5	73292794	73314077	11	2
ENSMUSG00000029420	5	128760401	128953362	22	1
ENSMUSG00000029465	5	122391878	122406179	20	1
ENSMUSG00000029471	5	122731173	122779410	16	1
ENSMUSG00000029512	5	110784488	110810097	28	1
ENSMUSG00000029581	5	142960343	142973185	17	1
ENSMUSG00000029621	5	145083830	145108761	22	2
ENSMUSG00000029686	6	47453398	47526139	45	1
ENSMUSG00000029772	6	29768011	29912310	64	1
ENSMUSG00000029924	6	39334770	39377707	15	1
ENSMUSG00000030102	6	108213118	108551109	62	5
ENSMUSG00000030161	6	129533200	129542331	4	2
ENSMUSG00000030207	6	135197977	135244955	21	1
ENSMUSG00000030337	6	125215551	125244543	12	1
ENSMUSG00000030357	6	128429735	128438677	16	4
ENSMUSG00000030451	7	56050155	56231794	95	1
ENSMUSG00000030653	7	101421691	101512829	36	1
ENSMUSG00000030779	7	122965686	123002557	31	1
ENSMUSG00000030806	7	127803900	127824549	13	2
ENSMUSG00000030816	7	127588698	127603605	20	2
ENSMUSG00000030854	7	47077798	47133684	39	1
ENSMUSG00000031028	7	109010825	109034460	16	2
ENSMUSG00000031095	X	38533274	38576196	30	1
ENSMUSG00000031154	X	7841364	7876626	34	1
ENSMUSG00000031442	8	12873806	13020905	81	1
ENSMUSG00000031561	8	48227682	48844026	39	1
ENSMUSG00000031605	8	64739863	64849818	15	1
ENSMUSG00000031672	8	95864134	95888547	12	2
ENSMUSG00000031696	8	85260397	85299513	17	1
ENSMUSG00000031731	8	109778554	109864204	34	2
ENSMUSG00000031799	8	72134975	72153142	10	1
ENSMUSG00000031839	8	119344538	119348927	4	2
ENSMUSG00000031858	8	70016123	70042734	23	1
ENSMUSG00000031996	9	31149557	31211815	18	1
ENSMUSG00000032076	9	47530173	47857637	26	3
ENSMUSG00000032181	9	75643264	75683996	12	1
ENSMUSG00000032294	9	59656368	59679375	12	5
ENSMUSG00000032340	9	58874679	59036441	29	1
ENSMUSG00000032382	9	66088133	66126587	28	1
ENSMUSG00000032503	9	112065091	112235938	81	1
ENSMUSG00000032536	9	121366958	121474916	16	2
ENSMUSG00000032582	9	107773559	107873237	56	1
ENSMUSG00000032826	3	126921606	127499259	113	2
ENSMUSG00000032883 ENSMUSG00000079470	1	78657825	78707743	32	1
ENSMUSG00000032966	2	151542483	151561692	27	1
ENSMUSG00000033039	15	79108972	79136897	16	1
ENSMUSG00000033282	8	91217030	91313262	35	1
ENSMUSG00000033545	8	111536097	111626030	35	1
ENSMUSG00000033713	12	99194980	99450111	23	1
ENSMUSG00000033732	8	110810492	110846803	26	2
ENSMUSG00000033763	8	110721476	110741400	27	2
ENSMUSG00000034341	11	116078573	116086995	14	1
ENSMUSG00000034345	17	6079786	6086517	7	1
ENSMUSG00000034799	8	71624417	71671757	64	1
ENSMUSG00000035086	11	101285952	101302286	50	1
ENSMUSG00000035133	12	52516077	52567852	6	1
ENSMUSG00000035596	7	3677790	3693523	25	1
ENSMUSG00000035614	12	64965742	65022573	20	1
ENSMUSG00000035629	16	32821703	32877766	37	2
ENSMUSG00000035840	13	81657806	81671888	3	1
ENSMUSG00000035901	7	109893780	109960470	36	1
ENSMUSG00000036197	15	93239742	93275161	11	1
ENSMUSG00000036333	12	24974932	25059697	32	1
ENSMUSG00000036427	7	34202122	34230289	24	2
ENSMUSG00000036450	19	44562850	44576274	9	1
ENSMUSG00000036585	18	38838673	38929404	17	1
ENSMUSG00000036712	8	88697028	88751945	20	1
ENSMUSG00000036825	3	146404642	146440139	28	1
ENSMUSG00000036882	7	30522226	30534180	21	1
ENSMUSG00000036985	X	48171969	48208878	22	1
ENSMUSG00000037012	10	62268855	62379908	47	5
ENSMUSG00000037032	7	105558483	105581653	55	5
ENSMUSG00000037126	19	46312087	46327156	19	1
ENSMUSG00000037259	2	144470557	144527414	27	2
ENSMUSG00000037286	9	100597798	100959375	66	1
ENSMUSG00000037348	4	134496697	134510235	14	1
ENSMUSG00000037605	5	81020138	81825133	72	1
ENSMUSG00000037706	7	143052739	143067934	15	1
ENSMUSG00000037996	4	86983124	87230477	27	2
ENSMUSG00000038028	6	127085116	127109550	6	1
ENSMUSG00000038084	16	29579334	29654884	45	1
ENSMUSG00000038248	10	43002500	43174530	9	1
ENSMUSG00000038555	18	34840589	34847463	8	1
ENSMUSG00000038615	11	96817414	96829968	26	1
ENSMUSG00000038970	5	144100436	144188204	14	1
ENSMUSG00000039100	15	31455899	31531037	26	2
ENSMUSG00000039219	13	14063232	14199603	50	1
ENSMUSG00000039652	19	37021291	37208601	37	1
ENSMUSG00000039704	15	9140621	9198318	18	1
ENSMUSG00000040242	6	146577203	146599198	14	2
ENSMUSG00000040249	10	127538161	127621148	111	3
ENSMUSG00000040289	3	8663359	8667256	13	1
ENSMUSG00000040433	9	96682770	96752831	31	1
ENSMUSG00000040459 ENSMUSG00000098917	8	8666577	8690537	6	1
ENSMUSG00000040731	5	134619880	134639348	7	1
ENSMUSG00000040785	16	94370618	94469222	101	4
ENSMUSG00000040907	7	24978167	25005957	31	3
ENSMUSG00000040990	X	159627272	159978069	44	2
ENSMUSG00000041020	X	159414572	159498757	23	1
ENSMUSG00000041268	9	54365158	54501760	65	1
ENSMUSG00000041444	9	32116136	32268446	38	1
ENSMUSG00000041645	12	103407976	103425867	11	1
ENSMUSG00000041670	1	22286251	22805724	46	4
ENSMUSG00000041879	1	135382312	135430499	56	1
ENSMUSG00000041977	3	87617559	87738034	51	1
ENSMUSG00000041992	12	117516479	117756978	28	1
ENSMUSG00000042066	1	132356315	132391281	15	2
ENSMUSG00000042111 ENSMUSG00000101711	1	34436670	34444730	10	1
ENSMUSG00000042211	18	62504069	62548743	22	1
ENSMUSG00000042492	7	127197465	127208468	21	1
ENSMUSG00000042535	15	79690895	79721478	12	1
ENSMUSG00000042699	1	153455758	153487660	49	1
ENSMUSG00000042700	12	82170016	82451782	25	1
ENSMUSG00000043067	9	24411776	24503140	36	1
ENSMUSG00000043241	2	5951469	6056703	29	1
ENSMUSG00000043535	2	29124181	29182471	36	1
ENSMUSG00000043940	5	101832956	102069921	86	1
ENSMUSG00000044221	5	88659448	88676171	24	1
ENSMUSG00000045095	6	93675455	94283322	28	1
ENSMUSG00000046062	1	133131143	133139783	4	2
ENSMUSG00000046178	6	8948431	9249032	7	1
ENSMUSG00000046311	11	49203292	49218816	32	1
ENSMUSG00000046449	X	104077434	104201185	10	1
ENSMUSG00000047539	1	182313102	182341629	15	1
ENSMUSG00000047879	18	9995432	10045119	30	1
ENSMUSG00000048264	13	9276528	9668928	45	2
ENSMUSG00000049044	2	71981240	72257474	50	1
ENSMUSG00000049321	11	50898712	50916165	21	1
ENSMUSG00000049583	7	87602544	88134907	12	1
ENSMUSG00000049775	X	167207093	167209315	8	4
ENSMUSG00000049866	1	88673125	88702221	6	2
ENSMUSG00000050565	1	156035403	156068861	21	1
ENSMUSG00000050821	16	20693282	20703048	13	1
ENSMUSG00000051177	2	134786159	135475258	41	1
ENSMUSG00000051375	18	38185914	38212053	14	1
ENSMUSG00000051790	11	69823122	69837784	13	1
ENSMUSG00000052139 ENSMUSG00000029142	5	31596935	32084962	70	3
ENSMUSG00000052305	7	103826534	103828096	9	1
ENSMUSG00000052572	7	91090706	92447003	42	2
ENSMUSG00000052852	6	71707561	71810710	7	1
ENSMUSG00000053825	10	106470310	106933467	34	1
ENSMUSG00000053838	11	6105691	6200415	10	1
ENSMUSG00000054728	13	42680623	43138526	47	1
ENSMUSG00000054766	2	30057378	30072577	20	1
ENSMUSG00000055254	13	58806596	59133970	20	1
ENSMUSG00000055407	7	99267447	99337137	10	1
ENSMUSG00000055567	1	66468367	66699866	73	4
ENSMUSG00000056692	17	27751232	27820558	10	1
ENSMUSG00000057113	11	33152287	33163206	21	1
ENSMUSG00000057236	4	129307100	129335370	21	1
ENSMUSG00000057335	1	176733653	176814067	49	1
ENSMUSG00000057715	1	11414105	11975901	30	1
ENSMUSG00000058239	7	30945252	30956803	24	1
ENSMUSG00000059173	2	79834453	80129458	35	5
ENSMUSG00000059248	11	117199661	117362325	30	1
ENSMUSG00000060938	11	68901583	68906989	15	1
ENSMUSG00000061882 ENSMUSG00000023106	5	123907175	123969895	40	1
ENSMUSG00000062078	17	10206471	10319361	10	1
ENSMUSG00000062257	9	27790775	28925410	24	1
ENSMUSG00000062328	18	75000477	75003381	7	1
ENSMUSG00000062590 ENSMUSG00000094638 ENSMUSG00000026229	1	86064387	86278284	91	4
ENSMUSG00000062901	16	20097554	20127744	8	1
ENSMUSG00000063077	4	149176319	149307693	72	1
ENSMUSG00000063108	9	20432972	20460162	25	1
ENSMUSG00000063253	8	83434493	83458391	5	2
ENSMUSG00000063358	16	16983382	17047453	24	2
ENSMUSG00000063659	1	177442351	177450764	32	1
ENSMUSG00000064061	16	48924232	48994165	46	1
ENSMUSG00000064138	13	77708690	78166238	11	1
ENSMUSG00000064453 ENSMUSG00000058558	5	107900502	107909005	22	3
ENSMUSG00000066392	12	88722876	90334935	50	1
ENSMUSG00000066551	5	149046702	149053513	24	1
ENSMUSG00000067879	1	9601199	9627143	6	2
ENSMUSG00000068039 ENSMUSG00000065105	17	12915701	12925067	33	1
ENSMUSG00000068151	7	61127996	61311721	11	1
ENSMUSG00000068923	3	88744700	88775164	14	1
ENSMUSG00000069601	10	69533772	70027438	128	4
ENSMUSG00000070304	9	45117876	45130070	8	1
ENSMUSG00000071369	10	19934472	20142753	42	1
ENSMUSG00000072825	12	112722174	112746591	27	1
ENSMUSG00000073174 ENSMUSG00000040003	5	19227046	20706052	34	1
ENSMUSG00000073422 ENSMUSG00000024327 ENSMUSG00000092595	17	34026033	34031690	50	1
ENSMUSG00000074238	3	127807264	127837492	10	1
ENSMUSG00000074305	9	56201126	56418067	13	1
ENSMUSG00000074781	10	95515162	95545658	4	1
ENSMUSG00000075376	2	37370069	37422903	36	1
ENSMUSG00000077221 ENSMUSG00000040549	2	91526762	91620664	62	1
ENSMUSG00000077450	17	33742484	33760530	17	1
ENSMUSG00000078941 ENSMUSG00000052293	13	100650979	100666359	24	1	Taf9
ENSMUSG00000079157	8	9206001	9771018	3	1
ENSMUSG00000084516 ENSMUSG00000027177	2	104426481	104494446	26	2
ENSMUSG00000084899 ENSMUSG00000020048 ENSMUSG00000092686	10	86690209	86705509	32	1
ENSMUSG00000086040	6	54429603	54503768	15	1
ENSMUSG00000090137 ENSMUSG00000055553	8	70508263	70527956	41	1	Kxd1
ENSMUSG00000091228 ENSMUSG00000020857 ENSMUSG00000037601	11	93949814	93968521	18	2	Nme2	ENSMUSG00000037601	Nme1
ENSMUSG00000092232 ENSMUSG00000022194 ENSMUSG00000089682	14	54883377	54898169	42	2	Pabpn1	ENSMUSG00000089682	Bcl2l2
ENSMUSG00000092812 ENSMUSG00000028832	4	134468320	134473843	18	7	Stmn1
ENSMUSG00000092896 ENSMUSG00000025892	9	4417899	4796234	21	3
ENSMUSG00000093206 ENSMUSG00000001986	X	41400854	41678601	37	1
ENSMUSG00000093226 ENSMUSG00000033981	3	80681450	80802835	35	5
ENSMUSG00000093752 ENSMUSG00000078919 ENSMUSG00000051149	2	168180986	168230591	39	1
ENSMUSG00000093930	13	119690462	119708086	10	1
ENSMUSG00000096054	10	5020203	5550692	49	3
ENSMUSG00000097767 ENSMUSG00000099235 ENSMUSG00000099010 ENSMUSG00000098599 ENSMUSG00000098395	5	112213228	112229395	30	1
ENSMUSG00000098550 ENSMUSG00000000740 ENSMUSG00000064450	8	123102350	123105244	14	1
ENSMUSG00000099703 ENSMUSG00000065649 ENSMUSG00000088059 ENSMUSG00000037236 ENSMUSG00000097769	18	35553371	35593835	82	1
ENSMUSG00000102351 ENSMUSG00000055447	16	49855618	49915010	16	2
ENSMUSG00000104063 ENSMUSG00000103472 ENSMUSG00000102828 ENSMUSG00000103770 ENSMUSG00000103677 ENSMUSG00000103458 ENSMUSG00000103144 ENSMUSG00000102836 ENSMUSG00000103255 ENSMUSG00000103793 ENSMUSG00000104318 ENSMUSG00000104252 ENSMUSG00000103567 ENSMUSG00000102697 ENSMUSG00000103092 ENSMUSG00000023036 ENSMUSG00000103800 ENSMUSG00000102748 ENSMUSG00000103601 ENSMUSG00000103585 ENSMUSG00000103442 …	18	36930184	37841873	126	7

## Sheet: GF SI
geneID	chr	start	end	total_exons	exon_changes
ENSMUSG00000000131	7	126101715	126200501	67	2
ENSMUSG00000000134	X	7762560	7775202	39	3
ENSMUSG00000000197	14	123276641	123627144	44	7
ENSMUSG00000000223	X	134404551	134456573	37	1
ENSMUSG00000000276	11	89035179	89066850	17	1
ENSMUSG00000000308	2	121357714	121363737	30	11
ENSMUSG00000000326	16	18406886	18426852	11	1
ENSMUSG00000000374	10	78186725	78244642	23	1
ENSMUSG00000000399	6	126821863	126849144	11	3
ENSMUSG00000000416	6	18366478	18514869	42	2
ENSMUSG00000000420	18	24205344	24286818	28	1
ENSMUSG00000000441	6	115618067	115676635	27	1
ENSMUSG00000000538	11	60226714	60352905	28	1
ENSMUSG00000000563	3	105942698	105960099	18	7
ENSMUSG00000000568	5	99958426	99978938	37	6
ENSMUSG00000000581	11	17257579	17269176	14	1
ENSMUSG00000000631	11	77763246	77865980	90	4
ENSMUSG00000000743	8	123204264	123212763	12	1
ENSMUSG00000000759	8	12614277	12672248	40	1
ENSMUSG00000000787	X	13280970	13294052	29	1
ENSMUSG00000000804	11	84984442	85140161	50	9
ENSMUSG00000000805	11	84957786	84966044	19	2
ENSMUSG00000000826	2	181520485	181555133	20	2
ENSMUSG00000000838 ENSMUSG00000098736	X	68678485	68717963	37	2
ENSMUSG00000000861	11	24078056	24174123	16	2
ENSMUSG00000000881	X	100767722	100818410	34	1
ENSMUSG00000000915	5	123973628	124003211	46	5
ENSMUSG00000001016	3	90476201	90488379	14	1
ENSMUSG00000001017	3	90498956	90509498	24	1
ENSMUSG00000001052	3	129982759	130061553	42	1
ENSMUSG00000001054	11	51623671	51635896	17	1
ENSMUSG00000001062	8	123242356	123254348	41	4
ENSMUSG00000001089	4	136469761	136554780	19	2
ENSMUSG00000001098	5	114363567	114380515	20	1
ENSMUSG00000001100	11	78512193	78522736	22	2
ENSMUSG00000001105	11	78536361	78541737	16	1
ENSMUSG00000001119	10	76708792	76726168	38	1
ENSMUSG00000001120	10	76761857	76961887	36	1
ENSMUSG00000001127	X	20797814	20860519	41	3
ENSMUSG00000001138	1	36511867	36528237	15	1
ENSMUSG00000001150	10	76468971	76515856	29	3
ENSMUSG00000001151	10	76351254	76442912	42	2
ENSMUSG00000001156	6	86647044	86669159	6	3
ENSMUSG00000001158	6	86675221	86684522	12	2
ENSMUSG00000001175	12	100199435	100209806	11	1
ENSMUSG00000001211	10	78269178	78352489	30	2
ENSMUSG00000001227	17	56123085	56140343	18	1
ENSMUSG00000001229	17	56186682	56218889	21	3
ENSMUSG00000001270	12	111669355	111672338	8	1
ENSMUSG00000001289 ENSMUSG00000001285	15	102326116	102338139	47	2
ENSMUSG00000001300	8	8617434	8660773	7	1
ENSMUSG00000001323	11	74906359	74925948	28	5
ENSMUSG00000001366	9	78081499	78109065	25	1
ENSMUSG00000001376	6	3498382	3603319	49	7
ENSMUSG00000001415	3	88336260	88362338	41	1
ENSMUSG00000001424	6	28475139	28935162	44	2
ENSMUSG00000001440	11	97159714	97187881	27	2
ENSMUSG00000001441	11	97205842	97280638	62	1
ENSMUSG00000001467	5	4081145	4104746	17	5
ENSMUSG00000001472	8	123373824	123404173	20	9
ENSMUSG00000001525	17	35833921	35838306	12	1
ENSMUSG00000001542	13	75707484	75772356	12	2
ENSMUSG00000001630	6	146724995	146778812	17	2
ENSMUSG00000001687	5	148504631	148552789	11	1
ENSMUSG00000001729	12	112653821	112674884	32	3
ENSMUSG00000001767	2	145917479	145935014	18	1
ENSMUSG00000001774	9	18292267	18314000	11	3
ENSMUSG00000001783	10	85938637	85957823	14	2
ENSMUSG00000001785	10	85871831	85889096	21	1
ENSMUSG00000001794	7	30186942	30195164	24	6
ENSMUSG00000001802	7	35200027	35215370	13	1
ENSMUSG00000001829	7	101663633	101790168	36	3
ENSMUSG00000001891	11	21321138	21371201	17	2
ENSMUSG00000001911	8	84699876	84800344	29	1
ENSMUSG00000001924	X	20658326	20683179	35	2
ENSMUSG00000001983	11	106066061	106073612	5	1
ENSMUSG00000002017	17	75537086	75551946	12	1
ENSMUSG00000002028	9	44803355	44881296	45	4
ENSMUSG00000002031	9	44767908	44792714	41	4
ENSMUSG00000002052	11	78206746	78245987	40	4
ENSMUSG00000002102	2	91054009	91066369	34	4
ENSMUSG00000002107	2	6539694	7509563	70	8
ENSMUSG00000002210	7	24399619	24422778	26	2
ENSMUSG00000002221	5	27740667	27791339	21	1
ENSMUSG00000002222	6	71388634	71440637	18	2
ENSMUSG00000002265	7	6703892	6730421	16	2
ENSMUSG00000002319 ENSMUSG00000002320	14	55625400	55643806	98	5
ENSMUSG00000002332	14	55739020	55745690	15	1
ENSMUSG00000002341	8	70093085	70120873	15	6
ENSMUSG00000002342	8	70172356	70183681	39	1
ENSMUSG00000002346	8	70184340	70212305	14	1
ENSMUSG00000002372	17	56673225	56711769	16	1
ENSMUSG00000002395	8	71366848	71369732	29	1
ENSMUSG00000002396	8	71371298	71379361	11	1
ENSMUSG00000002413	6	39603237	39725463	33	1
ENSMUSG00000002416 ENSMUSG00000046947	6	39573873	39603382	42	3
ENSMUSG00000002459	1	4909576	5070285	16	1
ENSMUSG00000002489	16	89787111	89980080	51	4
ENSMUSG00000002496	17	24595937	24632629	40	2
ENSMUSG00000002524	15	76070184	76080946	12	1
ENSMUSG00000002546	2	32287384	32307921	49	5
ENSMUSG00000002580	11	98437708	98438991	4	2
ENSMUSG00000002602	7	25757273	25788705	33	2
ENSMUSG00000002625	17	32321425	32350581	14	2
ENSMUSG00000002658	17	57003405	57011288	13	2
ENSMUSG00000002718	2	166906040	166946389	52	7
ENSMUSG00000002731	2	76629898	76648015	9	1
ENSMUSG00000002768	17	46681137	46683105	4	3
ENSMUSG00000002812	11	60714123	60727263	36	1
ENSMUSG00000002948 ENSMUSG00000089736	8	4238740	4251423	37	2
ENSMUSG00000002949	8	4259731	4275913	32	5
ENSMUSG00000002957	7	141562180	141633011	22	4
ENSMUSG00000002968	7	44879391	44892397	18	1
ENSMUSG00000002985	7	19696109	19699166	25	1
ENSMUSG00000002996	12	31926254	31950535	29	4
ENSMUSG00000002997	12	31958476	32061296	16	2
ENSMUSG00000003037	8	72161200	72183904	13	1
ENSMUSG00000003039	8	72219730	72223764	4	3
ENSMUSG00000003119	11	98203059	98278504	30	1
ENSMUSG00000003131	9	45965311	45984871	6	2
ENSMUSG00000003153	6	122727809	122801640	26	3
ENSMUSG00000003161	5	8046078	8069379	19	4
ENSMUSG00000003178	6	121007241	121081609	18	2
ENSMUSG00000003199	17	56005711	56016790	32	3
ENSMUSG00000003200	17	56016753	56036637	10	1
ENSMUSG00000003226	10	58446852	58494155	29	5
ENSMUSG00000003234	16	20548577	20561379	30	2
ENSMUSG00000003235	16	20498817	20509955	19	1
ENSMUSG00000003269	7	45806637	45814581	30	3
ENSMUSG00000003273	7	45699843	45704682	13	1
ENSMUSG00000003279	17	69969073	70821413	46	2
ENSMUSG00000003308	9	21229730	21239332	17	1
ENSMUSG00000003316	8	111154421	111259216	34	4
ENSMUSG00000003344	10	80642617	80657071	19	2
ENSMUSG00000003345	10	80622780	80640771	14	1
ENSMUSG00000003352	15	98632220	98644530	14	4
ENSMUSG00000003360	15	98645134	98662889	30	1
ENSMUSG00000003363	7	27532000	27553218	30	1
ENSMUSG00000003402	9	22003035	22014219	19	6
ENSMUSG00000003411	4	108879063	108943324	12	1
ENSMUSG00000003435	7	28314898	28338719	30	6
ENSMUSG00000003437	7	28392951	28399388	35	1
ENSMUSG00000003438	7	28305516	28312072	22	1
ENSMUSG00000003452	6	149408984	149563329	24	2
ENSMUSG00000003464	1	172126755	172136493	19	3
ENSMUSG00000003469	14	70457476	70468832	7	1
ENSMUSG00000003534	17	35681567	35704621	37	1
ENSMUSG00000003541	17	35821684	35822923	2	1
ENSMUSG00000003575	8	70382355	70439579	23	1
ENSMUSG00000003657	8	110142539	110168206	11	1
ENSMUSG00000003660	2	127208386	127240451	56	4
ENSMUSG00000003662	2	127240938	127247816	13	1
ENSMUSG00000003731	4	129643980	129672767	23	1
ENSMUSG00000003778	18	34598615	34624601	35	4
ENSMUSG00000003810	4	116306762	116464183	61	1
ENSMUSG00000003863	7	45339126	45367019	46	4
ENSMUSG00000003868	7	45421852	45438096	22	8
ENSMUSG00000003872	7	45367891	45370583	15	1
ENSMUSG00000003923	10	71225464	71238280	15	1
ENSMUSG00000003948	11	90187684	90278589	16	1
ENSMUSG00000003970	15	76904071	76906318	6	3
ENSMUSG00000003974	5	9485236	9725352	6	2
ENSMUSG00000004032	3	107895821	107898686	19	3
ENSMUSG00000004040	11	100885098	100939540	55	2
ENSMUSG00000004056	7	27591552	27640826	45	2
ENSMUSG00000004070	16	4726361	4766742	18	1
ENSMUSG00000004071	16	4750348	4790292	17	1
ENSMUSG00000004099	9	20907206	20959888	42	5
ENSMUSG00000004110	1	154390731	154884501	62	3
ENSMUSG00000004113	2	24603887	24763152	70	2
ENSMUSG00000004151	12	38779380	38868215	40	3
ENSMUSG00000004187	15	76660641	76668196	18	4
ENSMUSG00000004207	10	60277627	60302597	21	5
ENSMUSG00000004264 ENSMUSG00000088835	6	124712336	124716950	26	3
ENSMUSG00000004267	6	124760053	124769673	44	10
ENSMUSG00000004285	6	29467718	29470512	4	2
ENSMUSG00000004319	8	60910389	60983300	31	6
ENSMUSG00000004360	10	29211643	29230779	6	3
ENSMUSG00000004364	1	80264923	80340480	28	1
ENSMUSG00000004383	8	72814599	73353540	19	4
ENSMUSG00000004394	11	6270369	6274870	10	2
ENSMUSG00000004451	1	119470305	119504794	8	1
ENSMUSG00000004460	16	22857845	22879634	20	2
ENSMUSG00000004508	7	97081751	97308940	10	1
ENSMUSG00000004535	6	52713729	52766780	32	4
ENSMUSG00000004558	14	51905271	51913488	16	2
ENSMUSG00000004567	8	3500457	3515232	28	1
ENSMUSG00000004568	8	3393006	3456601	33	1
ENSMUSG00000004591	3	142790902	142882004	43	4
ENSMUSG00000004667	10	80035949	80039795	18	1
ENSMUSG00000004698	12	34371503	34528889	12	1
ENSMUSG00000004768	1	33719887	33742564	28	1
ENSMUSG00000004771	9	64715299	64737758	24	2
ENSMUSG00000004788	12	85219481	85226628	22	9
ENSMUSG00000004798	11	61775649	61855073	32	3
ENSMUSG00000004815	5	108646693	108669672	46	1
ENSMUSG00000004849	5	137034993	137046135	13	4
ENSMUSG00000004865	17	28587648	28622521	30	1
ENSMUSG00000004892	3	87987531	88000230	23	1
ENSMUSG00000004895	3	87858903	87885608	7	1
ENSMUSG00000004897	3	87906321	87916132	17	7
ENSMUSG00000004902	6	120773768	120793982	10	1
ENSMUSG00000004933	10	81252935	81263365	35	3
ENSMUSG00000004936	9	64185770	64253631	18	1
ENSMUSG00000004937	10	81044075	81060178	12	1
ENSMUSG00000004961	7	4539768	4546567	8	1
ENSMUSG00000004980	6	51460434	51469894	17	2
ENSMUSG00000005034	3	146729579	146812960	17	2
ENSMUSG00000005045	4	152338651	152390194	49	12
ENSMUSG00000005069	6	124396816	124415067	29	2
ENSMUSG00000005089	2	102658659	102790784	34	1
ENSMUSG00000005102	2	118388618	118475234	50	1
ENSMUSG00000005103	5	38526814	38561666	15	1
ENSMUSG00000005161	8	84969587	84974834	19	1
ENSMUSG00000005198	11	69733997	69758637	37	1
ENSMUSG00000005299	5	33739673	33782817	21	4
ENSMUSG00000005354	15	77915047	77929006	21	1
ENSMUSG00000005360	15	8634124	8710764	26	4
ENSMUSG00000005362	6	106778249	106800074	20	1
ENSMUSG00000005371	17	87990859	88065291	29	4
ENSMUSG00000005378	5	135052957	135064959	42	1
ENSMUSG00000005417	11	59661305	59780860	38	7
ENSMUSG00000005505	2	90904740	90911626	13	1
ENSMUSG00000005506	2	90940382	91019497	33	1
ENSMUSG00000005510	2	90894634	90904827	18	1
ENSMUSG00000005514	5	135670033	135735326	31	1
ENSMUSG00000005533	7	67952859	68226780	21	2
ENSMUSG00000005534	8	3150922	3279617	23	4
ENSMUSG00000005580	16	4287529	4420498	16	2
ENSMUSG00000005583	13	83504034	83667079	17	3
ENSMUSG00000005610 ENSMUSG00000088948	7	111070568	111083030	54	7
ENSMUSG00000005625	3	95032694	95042614	30	1
ENSMUSG00000005672	5	75574916	75656722	30	1
ENSMUSG00000005674	1	171216011	171222514	26	1
ENSMUSG00000005687	3	103171655	103179166	21	5
ENSMUSG00000005871	18	34220924	34322189	32	7
ENSMUSG00000005873	18	34344889	34373415	5	2
ENSMUSG00000005881	2	156008045	156018279	34	2
ENSMUSG00000005886	1	13139105	13374083	40	1
ENSMUSG00000005893	6	92091390	92173057	25	1
ENSMUSG00000005899	16	17619354	17644828	59	2
ENSMUSG00000006005	1	150392838	150449935	81	4
ENSMUSG00000006010	1	150361305	150393080	32	1
ENSMUSG00000006021	7	16119895	16127516	29	2
ENSMUSG00000006050	18	36666681	36679366	30	3
ENSMUSG00000006169	11	45852051	45910625	16	1
ENSMUSG00000006276	8	72341001	72421474	24	2
ENSMUSG00000006288	14	50765415	50785518	10	3
ENSMUSG00000006299	1	74279840	74284738	27	3
ENSMUSG00000006304	1	74236084	74268209	19	2
ENSMUSG00000006315	7	30727701	30729534	7	1
ENSMUSG00000006373	X	36598206	36606079	3	2
ENSMUSG00000006412	1	171345670	171359254	9	2
ENSMUSG00000006456 ENSMUSG00000096370 ENSMUSG00000094936	19	4742913	4811634	38	1
ENSMUSG00000006464	19	4886898	4906627	17	1
ENSMUSG00000006494	2	71873224	71903858	29	1
ENSMUSG00000006522	14	30908573	30923760	34	1
ENSMUSG00000006526	14	30825590	30876986	16	1
ENSMUSG00000006575	11	102393403	102402555	27	12
ENSMUSG00000006576	1	75546266	75562172	48	4
ENSMUSG00000006651	7	30434981	30445582	17	4
ENSMUSG00000006673 ENSMUSG00000032604 ENSMUSG00000103970	9	108507713	108560163	107	3
ENSMUSG00000006676	9	108490602	108502337	65	5
ENSMUSG00000006711	13	24845135	24901270	26	1
ENSMUSG00000006728	10	127063534	127067920	28	3
ENSMUSG00000006740	18	6201002	6242174	42	2
ENSMUSG00000006800	2	166073089	166155663	35	3
ENSMUSG00000006920	11	101191115	101226463	38	8
ENSMUSG00000006930	11	100347327	100356128	22	4
ENSMUSG00000006932	9	120929216	120960507	50	6
ENSMUSG00000006998	16	20651652	20663414	34	11
ENSMUSG00000007038	17	34931253	34935953	11	1
ENSMUSG00000007097	1	172271709	172298064	28	1
ENSMUSG00000007207	5	135023482	135051100	19	1
ENSMUSG00000007411	12	111574510	111656227	17	2
ENSMUSG00000007415	5	3632932	3647934	10	4
ENSMUSG00000007458	6	122308720	122317680	11	1
ENSMUSG00000007476 ENSMUSG00000079484 ENSMUSG00000052533 ENSMUSG00000098794 ENSMUSG00000099041	2	30237715	30344266	103	1
ENSMUSG00000007613	4	47353222	47414931	19	1
ENSMUSG00000007617	13	93303757	93404129	27	10
ENSMUSG00000007653	11	42419757	42629028	19	3
ENSMUSG00000007656	9	75037614	75060313	27	1
ENSMUSG00000007659	2	152780668	152831728	21	6
ENSMUSG00000007670	17	57021058	57031507	18	1
ENSMUSG00000007739	11	22990519	23003780	33	3
ENSMUSG00000007827	6	118501308	118562226	38	2
ENSMUSG00000007891 ENSMUSG00000045777	7	142325837	142388038	30	10
ENSMUSG00000007908	9	76014855	76136350	19	1
ENSMUSG00000007950	8	71456700	71463657	5	1
ENSMUSG00000008153	6	124430759	124464794	30	4
ENSMUSG00000008200	2	90745370	90781021	36	4
ENSMUSG00000008348	5	125385965	125390202	7	1
ENSMUSG00000008475	1	152766542	152775597	6	1
ENSMUSG00000008489	4	91250763	91400785	36	3
ENSMUSG00000008575	4	82290173	82705750	29	1
ENSMUSG00000008604	3	88553758	88569725	21	2
ENSMUSG00000008658	16	6809222	7412479	16	2
ENSMUSG00000008668	17	33951999	33956001	23	4
ENSMUSG00000008683	7	118104378	118116186	18	4
ENSMUSG00000008690	15	89355719	89372826	49	14
ENSMUSG00000008763	3	100562208	100685503	24	3
ENSMUSG00000008855 ENSMUSG00000098863	11	102194432	102230166	78	3
ENSMUSG00000008892	8	22577075	22593813	10	4
ENSMUSG00000008958	3	95111022	95123051	15	1
ENSMUSG00000009013	5	115297110	115300999	12	6
ENSMUSG00000009073	11	4765845	4849536	37	5
ENSMUSG00000009079	11	5069689	5099266	42	5
ENSMUSG00000009090	11	4986824	5042791	32	3
ENSMUSG00000009207	2	74520291	74579435	39	3
ENSMUSG00000009394	6	115134902	115282626	14	1
ENSMUSG00000009418 ENSMUSG00000090399	1	135434580	135688105	52	1
ENSMUSG00000009470	13	98839019	98926384	31	1
ENSMUSG00000009535	18	68300355	68324852	27	2
ENSMUSG00000009549	2	118475850	118479711	13	1
ENSMUSG00000009569	16	13256481	13417529	24	1
ENSMUSG00000009575	15	103191544	103239816	13	1
ENSMUSG00000009681	10	75060896	75184923	23	2
ENSMUSG00000009687 ENSMUSG00000098783	7	31032722	31042481	33	1
ENSMUSG00000009741	9	113930934	113977199	21	1
ENSMUSG00000009894	11	59407134	59451186	23	3
ENSMUSG00000009905	1	106720459	106759727	15	3
ENSMUSG00000009907	1	106764071	106796728	22	1
ENSMUSG00000010025	11	61223417	61267464	22	3
ENSMUSG00000010086	11	61448442	61454131	29	3
ENSMUSG00000010095	19	8706882	8723369	11	3
ENSMUSG00000010097	19	8757073	8772475	49	1
ENSMUSG00000010110 ENSMUSG00000098844	19	8741413	8756069	55	1
ENSMUSG00000010277	11	78261752	78290623	56	3
ENSMUSG00000010376	14	55662265	55671906	8	3
ENSMUSG00000010392	11	76726602	76763579	10	1
ENSMUSG00000010453	1	36335730	36369181	40	3
ENSMUSG00000010517	4	109676588	109963960	22	7
ENSMUSG00000010554	11	74770830	74828525	22	4
ENSMUSG00000010608	12	83631236	83683123	60	10
ENSMUSG00000010663	19	10182888	10196870	12	3
ENSMUSG00000010755	7	143557230	143600090	39	1
ENSMUSG00000010803	11	42130939	42182930	17	2
ENSMUSG00000010914	2	103021075	103073513	15	1
ENSMUSG00000011306	8	70042813	70071953	14	1
ENSMUSG00000011589	17	55986511	55996881	13	1
ENSMUSG00000011831	5	107744795	107875107	46	8
ENSMUSG00000011832	8	4166567	4211257	49	4
ENSMUSG00000011877	11	77493562	77507786	32	4
ENSMUSG00000011960	15	98538689	98570923	26	1
ENSMUSG00000012114	16	17651221	17722930	18	1
ENSMUSG00000012405	14	18267823	18271391	13	3
ENSMUSG00000012535	6	29540827	29609887	45	1
ENSMUSG00000012609	12	85824659	86061893	77	1
ENSMUSG00000013033	8	83900105	83941954	40	4
ENSMUSG00000013076	9	14541966	14615483	20	1
ENSMUSG00000013419	9	121760033	121771742	6	1
ENSMUSG00000013495	5	108629770	108647770	18	1
ENSMUSG00000013523	2	170346991	170427845	27	1
ENSMUSG00000013622	5	31048312	31054633	26	2
ENSMUSG00000013662	19	32672563	32712298	10	4
ENSMUSG00000013698	1	172196728	172206804	12	2
ENSMUSG00000013787	17	34898469	34914052	59	3
ENSMUSG00000013878	8	26119368	26143871	25	1
ENSMUSG00000013921	7	30291672	30308367	28	1
ENSMUSG00000014077	2	119547697	119587027	15	1
ENSMUSG00000014195	11	100582818	100620168	33	2
ENSMUSG00000014232 ENSMUSG00000005982 ENSMUSG00000093575	16	3872375	3941147	58	4
ENSMUSG00000014313	15	35925886	35938246	15	3
ENSMUSG00000014353	2	128818118	128854261	34	3
ENSMUSG00000014355	2	128610104	128687391	70	2
ENSMUSG00000014361	2	128698956	128802894	22	3
ENSMUSG00000014426	17	12227621	12318660	27	7
ENSMUSG00000014496	14	31700015	31830415	28	2
ENSMUSG00000014504	18	34330847	34336599	17	1
ENSMUSG00000014551	6	92169525	92184033	8	2
ENSMUSG00000014592	4	150917322	151861876	52	1
ENSMUSG00000014602	1	93015464	93101951	75	9
ENSMUSG00000014606	11	70644196	70647479	19	1
ENSMUSG00000014786	8	105348258	105369881	16	1
ENSMUSG00000014846	8	105467493	105471526	8	2
ENSMUSG00000014873	2	26916367	26920183	21	1
ENSMUSG00000014956	5	32458974	32517433	14	1
ENSMUSG00000014959	2	70661576	70712636	20	2
ENSMUSG00000015002	15	65787034	65873816	45	4
ENSMUSG00000015087	2	25583018	25608521	35	12
ENSMUSG00000015090	2	25466709	25470046	16	4
ENSMUSG00000015120	17	25261916	25274622	35	2
ENSMUSG00000015165	7	28808541	28822266	40	4
ENSMUSG00000015189	6	4600840	4643381	24	4
ENSMUSG00000015222	1	66175273	66442583	68	13
ENSMUSG00000015224	4	96568429	96591578	10	1
ENSMUSG00000015291	X	74304998	74311862	34	3
ENSMUSG00000015357	9	65294260	65330658	19	1
ENSMUSG00000015461	17	34647146	34655074	27	1
ENSMUSG00000015488	2	27009926	27021089	21	3
ENSMUSG00000015501	10	13966075	14151374	23	1
ENSMUSG00000015697	3	95323525	95357202	31	4
ENSMUSG00000015709	7	84246281	84409959	19	1
ENSMUSG00000015733	6	17636234	17666972	26	1
ENSMUSG00000015748	3	95830124	95855885	36	1
ENSMUSG00000015749	3	95929246	95947390	28	1
ENSMUSG00000015757	10	7792891	7823135	21	1
ENSMUSG00000015804	5	45520221	45529276	12	1
ENSMUSG00000015806	5	45434032	45450235	21	1
ENSMUSG00000015829	1	159523769	159931729	31	2
ENSMUSG00000015837	11	50199366	50210827	24	1
ENSMUSG00000015846	2	27676440	27762957	21	1
ENSMUSG00000015981	7	139103638	139213307	13	1
ENSMUSG00000016018	13	112867780	112927380	27	3
ENSMUSG00000016150	X	42527866	43429126	43	4
ENSMUSG00000016179	1	193346346	193370298	20	1
ENSMUSG00000016253	2	174415804	174427502	29	3
ENSMUSG00000016344	2	181187247	181188771	14	1
ENSMUSG00000016382	X	75785654	75875182	26	2
ENSMUSG00000016386	2	106693269	106868356	17	1
ENSMUSG00000016409	X	37126795	37150746	11	1
ENSMUSG00000016427	X	37187588	37191163	3	1
ENSMUSG00000016481	1	195097382	195131586	32	1
ENSMUSG00000016487	6	146888487	147032025	51	2
ENSMUSG00000016528	1	131053700	131097826	11	2
ENSMUSG00000016554	15	77958998	77970824	15	2
ENSMUSG00000016559	11	116021912	116027962	14	4
ENSMUSG00000016664	15	83375607	83464606	18	1
ENSMUSG00000016763	15	83602583	83725021	29	2
ENSMUSG00000016921	2	162931528	162937121	15	2
ENSMUSG00000017119 ENSMUSG00000099023	11	101552149	101581951	59	6
ENSMUSG00000017132	11	118132019	118248592	25	3
ENSMUSG00000017144	2	51130438	51149111	10	1
ENSMUSG00000017167	11	101170523	101190724	26	1
ENSMUSG00000017210 ENSMUSG00000088169	11	98704591	98729435	56	4
ENSMUSG00000017286 ENSMUSG00000049396 ENSMUSG00000017288	11	76046226	76243725	81	17
ENSMUSG00000017291	11	77529162	77607815	21	1
ENSMUSG00000017314	11	102057015	102088515	25	4
ENSMUSG00000017344	11	78499091	78502324	15	1
ENSMUSG00000017390	11	78322968	78327781	21	1
ENSMUSG00000017412	2	52428320	52676831	24	1
ENSMUSG00000017421	11	80383279	80405733	34	4
ENSMUSG00000017466	11	118301069	118355740	7	4
ENSMUSG00000017478	8	122376609	122417360	37	5
ENSMUSG00000017485	14	16365179	16430787	46	5
ENSMUSG00000017631	11	76416734	76622314	46	5
ENSMUSG00000017639	11	79591212	79698023	17	3
ENSMUSG00000017670	2	165288031	165326479	39	2
ENSMUSG00000017707	2	163623272	163645131	13	2
ENSMUSG00000017734 ENSMUSG00000090996 ENSMUSG00000045503	2	164456964	164493319	35	1
ENSMUSG00000017754	2	164839518	164857711	30	1
ENSMUSG00000017776	11	75679259	75706908	11	1
ENSMUSG00000017781	11	75588097	75628804	24	4
ENSMUSG00000017801	11	101087277	101092207	19	4
ENSMUSG00000017831	17	53479234	53507671	6	1
ENSMUSG00000017843	12	110485739	110583061	14	1
ENSMUSG00000017858	2	163017354	163046141	19	2
ENSMUSG00000017978	6	23262773	23839421	61	4
ENSMUSG00000017999	2	167015193	167034947	34	2
ENSMUSG00000018001	5	143622447	143710250	22	4
ENSMUSG00000018040	15	83113433	83122801	18	3
ENSMUSG00000018076	5	118560719	118765435	31	3
ENSMUSG00000018160	11	98152154	98193293	32	4
ENSMUSG00000018209	2	164070322	164155524	18	3
ENSMUSG00000018286	11	70525367	70527858	14	2
ENSMUSG00000018287	11	70663771	70669416	16	1
ENSMUSG00000018340	11	54979108	55033445	28	4
ENSMUSG00000018362	11	106988629	106999541	23	2
ENSMUSG00000018379	11	88047373	88053755	21	3
ENSMUSG00000018395	11	53567379	53601967	35	2
ENSMUSG00000018398	11	53519257	53549565	25	4
ENSMUSG00000018401	11	87592162	87616302	29	2
ENSMUSG00000018412	11	104333229	104468861	25	3
ENSMUSG00000018417	1	51749765	51916071	61	2
ENSMUSG00000018474	11	69343273	69369406	58	8
ENSMUSG00000018476	11	69398508	69413675	25	2
ENSMUSG00000018501	11	62316426	62458541	100	6
ENSMUSG00000018541	11	97745481	97766556	16	1
ENSMUSG00000018547	11	97715157	97744704	13	2
ENSMUSG00000018548	11	87127077	87220683	29	2
ENSMUSG00000018565	11	69968222	69982517	32	1
ENSMUSG00000018567	11	69991143	69994951	12	2
ENSMUSG00000018572	11	69995777	70000009	24	1
ENSMUSG00000018574	11	70010183	70015411	36	1
ENSMUSG00000018648	11	84048041	84069261	11	1
ENSMUSG00000018651	11	84078920	84129600	24	1
ENSMUSG00000018697	11	84422855	84513522	18	2
ENSMUSG00000018707	12	110601452	110666945	92	12
ENSMUSG00000018736	11	68821434	68871858	20	1
ENSMUSG00000018750	11	69765912	69784023	23	1
ENSMUSG00000018761	11	69656697	69662642	27	2
ENSMUSG00000018796	8	46471041	46536051	38	1
ENSMUSG00000018820	19	42163951	42194590	29	1
ENSMUSG00000018848	11	35808381	35834506	24	1
ENSMUSG00000018849	11	35838400	35980527	27	1
ENSMUSG00000018858	11	115403752	115412674	28	1
ENSMUSG00000018965	5	33018816	33027966	6	2
ENSMUSG00000019039	9	108569886	108572774	36	2
ENSMUSG00000019082	7	141429739	141437892	54	2
ENSMUSG00000019087	X	74297097	74304721	35	2
ENSMUSG00000019124	6	54505890	54566489	14	4
ENSMUSG00000019132	13	24801657	24814013	8	1
ENSMUSG00000019139	8	70594481	70597288	11	1
ENSMUSG00000019173	11	100715009	100738215	13	2
ENSMUSG00000019189	11	44518964	44565520	21	2
ENSMUSG00000019194	7	31116524	31126945	9	1
ENSMUSG00000019210	6	120795245	120822685	9	1
ENSMUSG00000019254	7	4481520	4501680	50	5
ENSMUSG00000019302	11	101009452	101063719	40	11
ENSMUSG00000019338	3	95006590	95015448	29	1
ENSMUSG00000019362	8	84246237	84249761	3	2
ENSMUSG00000019370	7	16915379	16924114	16	5
ENSMUSG00000019373	11	59817795	59839838	25	3
ENSMUSG00000019428	8	70527724	70535328	32	5
ENSMUSG00000019467	10	127182521	127190054	17	2
ENSMUSG00000019471	9	21138541	21149906	8	1
ENSMUSG00000019494	5	138161071	138164646	22	2
ENSMUSG00000019505	11	62551171	62553213	4	2
ENSMUSG00000019578	17	56067045	56075028	26	1
ENSMUSG00000019659	9	110656503	110711590	7	3
ENSMUSG00000019699	1	177020073	177258203	18	1
ENSMUSG00000019710	3	87919506	87923672	16	1
ENSMUSG00000019726	13	13590409	13777440	53	4
ENSMUSG00000019731	8	72480641	72492614	8	2
ENSMUSG00000019772	10	5639218	5647614	7	1
ENSMUSG00000019775	10	5825663	5922400	11	1
ENSMUSG00000019777	10	36974544	37001889	22	1
ENSMUSG00000019782	10	33996555	34019624	9	1
ENSMUSG00000019790	10	9755547	9901079	50	1
ENSMUSG00000019791	10	30608141	30618479	12	2
ENSMUSG00000019795	10	7629373	7681136	25	3
ENSMUSG00000019796	10	7589800	7625483	16	2
ENSMUSG00000019797	10	43525121	43540994	11	1
ENSMUSG00000019802	10	42761496	42832514	33	3
ENSMUSG00000019806	10	13647054	13868980	20	3
ENSMUSG00000019820	10	12382188	12861735	74	2
ENSMUSG00000019843	10	39368855	39565381	29	3
ENSMUSG00000019851	10	18845071	18857073	3	1
ENSMUSG00000019852	10	18588011	18743758	34	3
ENSMUSG00000019874	10	57784881	57788450	6	1
ENSMUSG00000019877	10	57515774	57532530	20	2
ENSMUSG00000019883	10	29313166	29346661	13	3
ENSMUSG00000019916	10	59323296	59373304	20	1
ENSMUSG00000019923	10	72654845	72674964	20	6
ENSMUSG00000019943	10	98915152	99026143	21	3
ENSMUSG00000019951	10	89744991	89819869	21	2
ENSMUSG00000019960	10	99263231	99267488	3	2
ENSMUSG00000019961	10	91147571	91171582	10	1
ENSMUSG00000019969	12	83688203	83735199	14	2
ENSMUSG00000019971	10	100488289	100573655	53	1
ENSMUSG00000019977	10	21295979	21368889	19	1
ENSMUSG00000019978	10	25359798	25523519	21	1
ENSMUSG00000019986	10	20952547	21080428	25	3
ENSMUSG00000019990	10	20398004	20725078	24	1
ENSMUSG00000019996	10	20148471	20281589	20	2
ENSMUSG00000019997	10	24595442	24598683	11	1
ENSMUSG00000019998	10	24149317	24188959	10	1
ENSMUSG00000020014	10	92775619	93081618	83	1
ENSMUSG00000020015	10	93160876	93241342	17	1
ENSMUSG00000020022	10	94198955	94221443	11	3
ENSMUSG00000020024	10	94688790	94790336	16	1
ENSMUSG00000020038	10	85131702	85185054	13	1
ENSMUSG00000020064	10	63243797	63317881	25	2
ENSMUSG00000020069	10	63014664	63024217	21	1
ENSMUSG00000020070	10	62980223	63017210	34	3
ENSMUSG00000020074	10	62743928	62792368	25	4
ENSMUSG00000020077	10	62493833	62527451	15	1
ENSMUSG00000020078	10	62454843	62486805	10	2
ENSMUSG00000020088	10	61680310	61693295	7	4
ENSMUSG00000020101	10	60346851	60372684	21	1
ENSMUSG00000020107	10	59987409	60003135	20	1
ENSMUSG00000020111	10	59702477	59864132	38	1
ENSMUSG00000020114	10	119199255	119240055	21	3
ENSMUSG00000020115	10	121546455	121586794	21	3
ENSMUSG00000020128	11	21239281	21321136	35	3
ENSMUSG00000020130	10	115197877	115251493	17	1
ENSMUSG00000020132	10	115289863	115315591	7	1
ENSMUSG00000020135	10	80295977	80318263	28	3
ENSMUSG00000020151	10	116018213	116274932	25	4
ENSMUSG00000020166	10	116485161	116581511	44	2
ENSMUSG00000020167	10	80409514	80433647	42	1
ENSMUSG00000020173	11	12236608	12464960	32	1
ENSMUSG00000020180	10	75517551	75537373	6	2
ENSMUSG00000020181	10	109682660	110456204	50	4
ENSMUSG00000020190	10	80665332	80671976	12	1
ENSMUSG00000020196	10	75646110	75764357	37	2
ENSMUSG00000020198	10	80706978	80742211	31	7
ENSMUSG00000020220	4	144972622	145195005	89	2
ENSMUSG00000020231	10	76259429	76345291	57	1
ENSMUSG00000020250	10	82859206	82897724	15	1
ENSMUSG00000020257	9	106170928	106191136	13	1
ENSMUSG00000020260	10	77259300	77269586	9	2
ENSMUSG00000020267	11	54866383	54870501	6	1
ENSMUSG00000020271	11	32642724	32746816	22	3
ENSMUSG00000020277	10	77986947	78010083	27	1
ENSMUSG00000020290	11	23256041	23298249	42	6
ENSMUSG00000020297	11	32000463	32059202	8	2
ENSMUSG00000020312	10	79617940	79637918	19	1
ENSMUSG00000020315	11	30099395	30268175	48	1
ENSMUSG00000020321	11	21556787	21572367	17	1
ENSMUSG00000020333	11	54303798	54364756	50	4
ENSMUSG00000020340	11	46193850	46312859	39	3
ENSMUSG00000020346	11	49244191	49263030	28	1
ENSMUSG00000020358	11	51600100	51606847	11	1
ENSMUSG00000020361	11	53259814	53300457	22	1
ENSMUSG00000020366	11	49846751	49886421	26	1
ENSMUSG00000020368	11	50293961	50325673	23	2
ENSMUSG00000020374	11	49901835	49980994	19	1
ENSMUSG00000020375	11	50389286	50431125	24	2
ENSMUSG00000020380	11	53649519	53707319	32	1
ENSMUSG00000020387	11	51813455	51857653	18	1
ENSMUSG00000020402	11	52360860	52389397	18	2
ENSMUSG00000020422	11	8431652	8664535	36	1
ENSMUSG00000020427	11	7206086	7213923	7	1
ENSMUSG00000020430	11	3963975	3980004	20	2
ENSMUSG00000020431	11	7063489	7178506	24	2
ENSMUSG00000020435	11	3703731	3863903	21	2
ENSMUSG00000020436	11	41910203	42000857	16	1
ENSMUSG00000020444	11	59183875	59192212	18	3
ENSMUSG00000020454	11	3202392	3244588	45	7
ENSMUSG00000020456	11	6291633	6356642	38	4
ENSMUSG00000020457 ENSMUSG00000023764	11	3131850	3266415	91	2
ENSMUSG00000020458	11	29692947	29744331	24	2
ENSMUSG00000020459	11	29526408	29545279	30	3
ENSMUSG00000020463	11	29172890	29220797	28	1
ENSMUSG00000020473	11	5861947	5872088	25	1
ENSMUSG00000020476	11	5788488	5800962	19	2
ENSMUSG00000020483	11	87979525	87987533	10	1
ENSMUSG00000020484	11	5520659	5525893	11	1
ENSMUSG00000020486 ENSMUSG00000090107	11	87566653	87590539	49	1
ENSMUSG00000020496	11	58932288	58938916	4	3
ENSMUSG00000020516	11	86498871	86544805	29	1
ENSMUSG00000020523	11	57482993	57518617	22	1
ENSMUSG00000020525	11	85311244	85347066	8	1
ENSMUSG00000020528	11	61729650	61762088	17	1
ENSMUSG00000020530	11	84832361	84870817	43	6
ENSMUSG00000020532	11	84129672	84401651	70	2
ENSMUSG00000020537	11	60454591	60468754	20	1
ENSMUSG00000020538 ENSMUSG00000099259	11	60199089	60222581	46	1
ENSMUSG00000020549	11	64979038	65002069	43	1
ENSMUSG00000020571	12	17266545	17284770	21	9
ENSMUSG00000020580	12	16894978	16988274	33	2
ENSMUSG00000020585	12	8921664	8938742	7	1
ENSMUSG00000020589	12	12262139	12376359	13	3
ENSMUSG00000020593	12	16535669	16589770	22	1
ENSMUSG00000020594	12	8674134	8752581	55	3
ENSMUSG00000020598	12	44328885	44601846	32	7
ENSMUSG00000020612	11	109649405	109669656	17	4
ENSMUSG00000020620	11	109932190	109995845	41	1
ENSMUSG00000020640	12	4593008	4713950	39	1
ENSMUSG00000020647	12	4247363	4477182	23	1
ENSMUSG00000020654	12	4133103	4213525	36	1
ENSMUSG00000020656	12	24572287	24617391	18	1
ENSMUSG00000020657	12	4082574	4110612	13	2
ENSMUSG00000020658	12	3962554	4038915	23	3
ENSMUSG00000020661	12	3806007	3914443	63	3
ENSMUSG00000020664	12	31331564	31351437	14	4
ENSMUSG00000020668	12	3365132	3406494	8	1
ENSMUSG00000020671	12	3247430	3309969	6	3
ENSMUSG00000020687	11	104502745	104550620	28	1
ENSMUSG00000020694	11	105178807	105283959	44	3
ENSMUSG00000020704	11	80880169	81968457	11	2
ENSMUSG00000020705	11	106216926	106249139	20	2
ENSMUSG00000020708	11	106256154	106263120	12	3
ENSMUSG00000020716	11	79339693	79581612	73	5
ENSMUSG00000020717	11	106654217	106750628	29	1
ENSMUSG00000020719 ENSMUSG00000093273 ENSMUSG00000093133	11	106780355	106789185	40	1
ENSMUSG00000020721	11	107547930	107693826	50	3
ENSMUSG00000020733	11	115163341	115181181	6	1
ENSMUSG00000020738	11	115523102	115536276	13	2
ENSMUSG00000020740	11	115584255	115604051	47	1
ENSMUSG00000020741	11	74649495	74670847	38	6
ENSMUSG00000020745	11	74673949	74724670	19	1
ENSMUSG00000020752	11	115892595	115933477	35	1
ENSMUSG00000020755	11	115933282	115966725	17	1
ENSMUSG00000020776	11	116142285	116168166	62	4
ENSMUSG00000020777	11	116171888	116199045	23	1
ENSMUSG00000020783	11	73047783	73080217	18	1
ENSMUSG00000020802	11	116537740	116581447	22	1
ENSMUSG00000020807	11	72153929	72207459	35	1
ENSMUSG00000020810	11	116645595	116654313	4	2
ENSMUSG00000020817	11	70844778	70943105	35	5
ENSMUSG00000020827	11	70562881	70614483	62	9
ENSMUSG00000020840	11	76924809	76987379	32	3
ENSMUSG00000020841	11	76778424	76847018	25	1
ENSMUSG00000020850	11	75486816	75509449	49	3
ENSMUSG00000020859	11	93996091	94126085	56	7
ENSMUSG00000020863	11	94287890	94321988	33	8
ENSMUSG00000020864	11	94328001	94341841	14	5
ENSMUSG00000020869	11	94629767	94645216	9	2
ENSMUSG00000020886	11	70017085	70045532	46	4
ENSMUSG00000020889	11	98767932	98775333	10	1
ENSMUSG00000020893	11	69095217	69109960	33	2
ENSMUSG00000020900	11	68691559	68816632	62	3
ENSMUSG00000020917	11	100476353	100528000	40	9
ENSMUSG00000020918	11	100704746	100712465	24	1
ENSMUSG00000020923	11	102304560	102319742	42	1
ENSMUSG00000020926	11	102761439	102780262	44	5
ENSMUSG00000020929	11	102838473	102880985	56	9
ENSMUSG00000020932	11	102887336	102900912	13	2
ENSMUSG00000020946	11	103676849	103697898	10	1
ENSMUSG00000020949	12	65062436	65073944	7	2
ENSMUSG00000020954	12	51608541	51691914	18	5
ENSMUSG00000020962	12	91555916	91590487	13	2
ENSMUSG00000020964	12	91806043	91849157	42	2
ENSMUSG00000020978	12	69296681	69310687	21	8
ENSMUSG00000020986	12	58958383	59012017	27	1
ENSMUSG00000020993	12	59043093	59061461	6	1
ENSMUSG00000021000	12	59129720	59191583	62	2
ENSMUSG00000021007	12	98628157	98669815	21	2
ENSMUSG00000021013	12	98920574	98983238	25	1
ENSMUSG00000021022	12	55280814	55303000	14	1
ENSMUSG00000021024	12	55384222	55418454	13	2
ENSMUSG00000021027 ENSMUSG00000092949	12	55602929	55821167	44	2
ENSMUSG00000021028	12	56328306	56345894	9	2
ENSMUSG00000021037	12	87266746	87273997	9	2
ENSMUSG00000021039	12	87449936	87472299	14	3
ENSMUSG00000021048	12	76255232	76319820	28	2
ENSMUSG00000021057	12	76324891	76334153	6	1
ENSMUSG00000021061	12	76580488	76710547	42	2
ENSMUSG00000021062	12	76797960	76822908	19	7
ENSMUSG00000021065	12	77238104	77476338	15	1
ENSMUSG00000021068	12	70011435	70111925	37	3
ENSMUSG00000021091	12	104406729	104414329	5	1
ENSMUSG00000021096	12	72761211	72794940	6	1
ENSMUSG00000021111	12	105784694	105838944	62	5
ENSMUSG00000021114	12	78842989	78861638	9	2
ENSMUSG00000021116	12	78861819	78887010	8	1
ENSMUSG00000021124	12	79156017	79172667	12	1
ENSMUSG00000021130	12	80518990	80603896	15	4
ENSMUSG00000021134	12	80945504	80950507	33	5
ENSMUSG00000021139 ENSMUSG00000090935 ENSMUSG00000091803	12	81358860	81532911	46	4
ENSMUSG00000021147	13	8802968	8871909	48	1
ENSMUSG00000021156	13	9684836	9765321	53	1
ENSMUSG00000021178	12	100110186	100123364	11	1
ENSMUSG00000021188	12	101834043	101913267	35	2
ENSMUSG00000021192	12	102469134	102497902	14	4
ENSMUSG00000021193	13	6548157	6580139	27	1
ENSMUSG00000021194	12	102554969	102565027	8	5
ENSMUSG00000021196	13	6579768	6648777	50	5
ENSMUSG00000021198 ENSMUSG00000098628	12	102948859	103184065	74	1
ENSMUSG00000021209	12	103532283	103613831	36	2
ENSMUSG00000021218	13	3538075	3566261	11	2
ENSMUSG00000021219	12	82616925	83162056	36	5
ENSMUSG00000021224	12	83794034	83921934	31	1
ENSMUSG00000021236	12	84373857	84409029	28	2
ENSMUSG00000021238	12	84430723	84450950	12	1
ENSMUSG00000021244	12	84996321	85070515	36	7
ENSMUSG00000021248	12	85340614	85374717	5	1
ENSMUSG00000021252	12	85815448	85824550	15	1
ENSMUSG00000021259	12	108334377	108362231	15	6
ENSMUSG00000021266	12	108860030	108894174	23	2
ENSMUSG00000021273	14	63145153	63177793	8	2
ENSMUSG00000021276	12	110872610	110889145	5	1
ENSMUSG00000021279	12	111292972	111377718	37	2
ENSMUSG00000021282	12	111538101	111546753	14	2
ENSMUSG00000021285	12	111828458	111908055	19	1
ENSMUSG00000021288	12	111758849	111807844	34	4
ENSMUSG00000021301	13	14226438	14523226	29	6
ENSMUSG00000021303	13	13784059	13827897	6	2
ENSMUSG00000021313	13	11553103	12106945	107	6
ENSMUSG00000021314	13	18948371	19150913	21	4
ENSMUSG00000021339	13	24992483	25020379	11	1
ENSMUSG00000021357	13	30813919	30974047	30	2
ENSMUSG00000021366	13	42052021	42185026	9	1
ENSMUSG00000021371	13	43538412	43560191	9	1
ENSMUSG00000021373	13	46501848	46649642	18	3
ENSMUSG00000021374	13	46679905	46727940	30	1
ENSMUSG00000021390	13	49608071	49624500	7	1
ENSMUSG00000021392	13	49653350	49679015	18	2
ENSMUSG00000021395	13	51100880	51152546	6	3
ENSMUSG00000021413	13	34875494	34902877	15	2
ENSMUSG00000021427	13	37971401	37994190	8	1
ENSMUSG00000021428	13	38036989	38061433	17	2
ENSMUSG00000021448	13	51431041	51567084	12	2
ENSMUSG00000021474	13	54071845	54108346	11	2
ENSMUSG00000021476	13	64161866	64186536	8	4
ENSMUSG00000021481	13	55105311	55134825	32	1
ENSMUSG00000021488	13	55209782	55318325	23	4
ENSMUSG00000021495	13	55539319	55571120	11	2
ENSMUSG00000021500	13	55635027	55681256	24	5
ENSMUSG00000021520	13	66900617	66905378	6	2
ENSMUSG00000021546	13	58391142	58403343	59	5
ENSMUSG00000021549	13	85214780	85289029	41	6
ENSMUSG00000021557	13	59449537	59585227	72	6
ENSMUSG00000021573	13	74009407	74035753	11	3
ENSMUSG00000021576	13	74303121	74317326	6	1
ENSMUSG00000021583	13	74639872	74691875	19	1
ENSMUSG00000021587	13	75089826	75132498	16	1
ENSMUSG00000021595	13	69533746	69635780	35	4
ENSMUSG00000021597	13	77043088	77135473	33	2
ENSMUSG00000021606	13	73319874	73328542	7	1
ENSMUSG00000021608	13	73467197	73516422	22	1
ENSMUSG00000021610	13	73604002	73620639	17	1
ENSMUSG00000021639	13	100460218	100492579	33	1
ENSMUSG00000021645	13	100124852	100137690	25	1
ENSMUSG00000021650	13	99319649	99344678	10	1
ENSMUSG00000021662	13	97898595	98206165	36	4
ENSMUSG00000021665	13	97176332	97198357	14	4
ENSMUSG00000021669	13	96542618	96640167	21	1
ENSMUSG00000021670	13	96648967	96670936	45	20
ENSMUSG00000021671	13	96388294	96415587	13	2
ENSMUSG00000021676	13	95627177	95891922	36	1
ENSMUSG00000021684	13	95024454	95250336	47	1
ENSMUSG00000021686	13	94358960	94566316	27	2
ENSMUSG00000021687	13	94201310	94285857	16	1
ENSMUSG00000021690	13	93430097	93499808	11	1
ENSMUSG00000021693	13	106958996	107022126	37	3
ENSMUSG00000021699	13	108449948	109953461	56	1
ENSMUSG00000021704	13	92844787	92858230	9	1
ENSMUSG00000021709	13	103818787	103920514	35	5
ENSMUSG00000021710	13	104023439	104109614	13	1
ENSMUSG00000021711	13	104142149	104178469	26	2
ENSMUSG00000021712	13	104178797	104203372	17	4
ENSMUSG00000021715	13	104631140	104817142	20	1
ENSMUSG00000021728	13	117220625	117274098	9	1
ENSMUSG00000021745	14	11553532	12242041	42	5
ENSMUSG00000021748	14	8165991	8172992	10	1
ENSMUSG00000021750	14	8296274	8318023	11	2
ENSMUSG00000021771	14	21831269	21845879	28	4
ENSMUSG00000021772	14	18271136	18283942	20	2
ENSMUSG00000021782	14	24133953	24245920	44	1
ENSMUSG00000021792	14	40993740	41013788	24	1
ENSMUSG00000021811	14	20384638	20388910	5	1
ENSMUSG00000021814	14	20455261	20480133	14	5
ENSMUSG00000021816	14	20499364	20546573	31	3
ENSMUSG00000021820	14	20734875	20794088	21	1
ENSMUSG00000021823	14	20929433	21033673	21	1
ENSMUSG00000021824	14	21031442	21052508	29	1
ENSMUSG00000021830	14	45134448	45220328	45	3
ENSMUSG00000021831	14	45283092	45318572	16	1
ENSMUSG00000021840	14	47298314	47323204	6	2
ENSMUSG00000021843	14	47648448	47736564	77	4
ENSMUSG00000021870	14	26413168	26534931	55	4
ENSMUSG00000021871	14	50944302	50965237	10	3
ENSMUSG00000021901	14	31251450	31259944	38	9
ENSMUSG00000021905	14	32080566	32085692	14	1
ENSMUSG00000021906	14	32085374	32103202	35	1
ENSMUSG00000021910	14	31170930	31216946	77	4
ENSMUSG00000021911	14	32201949	32297550	37	4
ENSMUSG00000021913	14	32322019	32347820	24	1
ENSMUSG00000021917	14	30999826	31001672	17	3
ENSMUSG00000021929	14	61365186	61439947	17	4
ENSMUSG00000021936	14	33377898	33447158	31	2
ENSMUSG00000021938	14	56722441	56778316	14	1
ENSMUSG00000021939	14	63122462	63145919	10	1
ENSMUSG00000021959 ENSMUSG00000021952	14	57581002	57758388	71	2
ENSMUSG00000021987	14	60265205	60302370	14	5
ENSMUSG00000021996	14	74732297	74750765	29	6
ENSMUSG00000022000	14	75284373	75344426	19	1
ENSMUSG00000022010	14	76414961	76507765	43	1
ENSMUSG00000022012	14	77156763	77721760	19	2
ENSMUSG00000022013	14	77826217	77874917	6	1
ENSMUSG00000022016	14	78492246	78536860	14	1
ENSMUSG00000022044	14	66344296	66361680	24	14
ENSMUSG00000022051	14	66985239	67008877	18	2
ENSMUSG00000022054	14	68082590	68124846	5	1
ENSMUSG00000022064	14	99099433	99254493	18	1
ENSMUSG00000022092	14	70217898	70289449	14	1
ENSMUSG00000022099	14	70602184	70636048	21	3
ENSMUSG00000022105	14	73183673	73325822	37	1
ENSMUSG00000022106	14	73123037	73207843	68	1
ENSMUSG00000022110	14	73525319	73596142	27	1
ENSMUSG00000022122	14	103814625	103844173	10	2
ENSMUSG00000022139	14	120275669	120431697	9	2
ENSMUSG00000022141	15	8291225	8444463	47	3
ENSMUSG00000022151	15	5185525	5218336	12	4
ENSMUSG00000022159	14	52261759	52279545	24	2
ENSMUSG00000022185	14	54642161	54686931	69	3
ENSMUSG00000022186	15	4026383	4155344	26	1
ENSMUSG00000022191	15	12824815	12935290	54	4
ENSMUSG00000022200	15	12321496	12351265	4	3
ENSMUSG00000022201	15	12117831	12185683	39	1
ENSMUSG00000022204	14	55015454	55024135	11	1
ENSMUSG00000022208	14	55106830	55116935	12	1
ENSMUSG00000022212	14	55510445	55517431	35	3
ENSMUSG00000022214	14	55560006	55570065	67	3
ENSMUSG00000022240	15	30172593	31029311	23	1
ENSMUSG00000022253	15	9071260	9110487	27	1
ENSMUSG00000022255	15	34082694	34142386	35	4
ENSMUSG00000022263	15	27730652	28025848	57	8
ENSMUSG00000022265 ENSMUSG00000098416	15	27466677	27594909	15	4
ENSMUSG00000022270	15	25843264	25973687	12	1
ENSMUSG00000022283	15	36595661	36608973	26	4
ENSMUSG00000022295	15	38661904	38692443	13	5
ENSMUSG00000022306	15	40655042	41104592	8	1
ENSMUSG00000022307	15	41447482	41861048	23	1
ENSMUSG00000022311	15	47580637	48792063	87	1
ENSMUSG00000022314	15	51962605	51991760	14	2
ENSMUSG00000022321	15	18818947	19014236	20	2
ENSMUSG00000022329	15	34875496	35155806	18	1
ENSMUSG00000022337	15	43477229	43527777	11	2
ENSMUSG00000022338	15	44428111	44437685	5	3
ENSMUSG00000022342	15	45106284	45114934	3	2
ENSMUSG00000022350	15	59331998	59374167	29	1
ENSMUSG00000022351	15	59315077	59331192	17	2
ENSMUSG00000022353	15	58941244	59082026	15	1
ENSMUSG00000022362 ENSMUSG00000022361 ENSMUSG00000101892	15	58022259	58076541	40	3
ENSMUSG00000022376	15	64699042	64922296	18	2
ENSMUSG00000022377	15	64086857	64382919	59	9
ENSMUSG00000022378	15	63929097	64060448	14	2
ENSMUSG00000022389	15	81802421	81826861	23	4
ENSMUSG00000022390	15	81744848	81796269	23	4
ENSMUSG00000022391	15	81704248	81729919	20	2
ENSMUSG00000022394	15	81663889	81688315	40	6
ENSMUSG00000022403	15	81363669	81400077	23	4
ENSMUSG00000022415	15	80091334	80119501	10	4
ENSMUSG00000022416	15	80287238	80398279	45	1
ENSMUSG00000022420	15	79761453	79777849	17	2
ENSMUSG00000022425	15	54838898	54920146	34	1
ENSMUSG00000022428	15	79659227	79667660	5	1
ENSMUSG00000022436	15	78899667	78919517	29	1
ENSMUSG00000022437	15	84192233	84214303	15	1
ENSMUSG00000022443	15	77760587	77842175	54	2
ENSMUSG00000022451	15	94577951	94589889	16	2
ENSMUSG00000022454	15	95219451	95528706	23	4
ENSMUSG00000022456	15	82274935	82294442	12	2
ENSMUSG00000022462	15	96687394	96699698	16	1
ENSMUSG00000022463	15	82147266	82205376	19	2
ENSMUSG00000022466	15	97675105	97705822	17	1
ENSMUSG00000022474	15	81951108	81960930	22	1
ENSMUSG00000022476	15	81915030	81926213	6	3
ENSMUSG00000022477	15	81872309	81915133	29	2
ENSMUSG00000022489	15	103503298	103530052	16	2
ENSMUSG00000022514	16	26581704	26730117	28	1
ENSMUSG00000022517	16	4886100	4938296	18	9
ENSMUSG00000022521	16	4081328	4213407	34	2
ENSMUSG00000022536	16	5013906	5049910	17	5
ENSMUSG00000022548	16	31296192	31314808	18	3
ENSMUSG00000022557	15	76452996	76477269	16	3
ENSMUSG00000022564	15	76246807	76249904	7	3
ENSMUSG00000022565 ENSMUSG00000063268	15	76170974	76243441	79	6
ENSMUSG00000022568	15	76047158	76069784	42	2
ENSMUSG00000022577	15	75551268	75567255	25	5
ENSMUSG00000022587	15	74955051	74959905	39	1
ENSMUSG00000022594	15	74747852	74753046	9	1
ENSMUSG00000022607	15	73205105	73423191	34	3
ENSMUSG00000022619	15	89453913	89464468	14	7
ENSMUSG00000022621	15	89582533	89591923	31	1
ENSMUSG00000022623	15	89499623	89560261	33	1
ENSMUSG00000022629	15	90933276	91049948	39	1
ENSMUSG00000022634	15	93284278	93336935	7	2
ENSMUSG00000022635	15	93386097	93398334	23	1
ENSMUSG00000022636	16	52248996	52454074	27	2
ENSMUSG00000022656	16	46387706	46498525	28	2
ENSMUSG00000022661	16	45382135	45409053	27	1
ENSMUSG00000022663	16	45158785	45188538	14	1
ENSMUSG00000022674	16	15552677	15594524	11	2
ENSMUSG00000022680	16	13833148	13903131	58	6
ENSMUSG00000022698	16	44139830	44163366	13	1
ENSMUSG00000022702 ENSMUSG00000099908 ENSMUSG00000071632	16	18836578	18970309	52	1
ENSMUSG00000022710	16	8689595	8792308	60	6
ENSMUSG00000022749	16	57168866	57231466	18	1
ENSMUSG00000022756	16	17572018	17576998	21	2
ENSMUSG00000022757	16	56690332	56717450	21	1
ENSMUSG00000022761	16	17508688	17526333	47	10
ENSMUSG00000022762	16	81200697	81624285	19	2
ENSMUSG00000022763	16	17489611	17507485	35	1
ENSMUSG00000022770	16	31663443	31873356	61	2
ENSMUSG00000022771	16	17086555	17111257	42	1
ENSMUSG00000022774	16	31948513	31961781	13	5
ENSMUSG00000022789	16	16312235	16359030	21	1
ENSMUSG00000022791	16	32643874	32683493	46	4
ENSMUSG00000022797	16	32608920	32632794	29	3
ENSMUSG00000022801	16	32914100	33015647	41	5
ENSMUSG00000022808	16	33251456	33299562	14	3
ENSMUSG00000022811	16	33380775	33503903	11	3
ENSMUSG00000022814	16	33954782	33967038	8	1
ENSMUSG00000022822	16	20331303	20426394	59	3
ENSMUSG00000022829	16	37114942	37384962	39	4
ENSMUSG00000022837	16	36828385	36872721	31	1
ENSMUSG00000022840	16	35154877	35305737	21	4
ENSMUSG00000022841	16	20535478	20544909	33	1
ENSMUSG00000022842	16	20611593	20646485	38	1
ENSMUSG00000022855	16	22009484	22049269	17	1
ENSMUSG00000022858	16	22244549	22266005	21	1
ENSMUSG00000022861	16	22468461	22657221	32	2
ENSMUSG00000022867	16	77014069	77116779	24	6
ENSMUSG00000022884 ENSMUSG00000064382 ENSMUSG00000064880 ENSMUSG00000088524 ENSMUSG00000087935 ENSMUSG00000065208	16	23107444	23114136	71	14
ENSMUSG00000022890	16	84827866	84835625	27	2
ENSMUSG00000022892	16	84954440	85173707	16	3
ENSMUSG00000022897	16	94570010	94695517	23	6
ENSMUSG00000022905	16	35978750	36037131	35	1
ENSMUSG00000022914	16	95992092	96082526	67	3
ENSMUSG00000022935	16	87896196	88056176	17	1
ENSMUSG00000022946	16	93711907	93810585	37	1
ENSMUSG00000022957	16	91729281	91920597	89	1
ENSMUSG00000022961	16	91647506	91679221	42	3
ENSMUSG00000022973	16	90936092	91011308	54	6
ENSMUSG00000022974	16	91014037	91044543	35	1
ENSMUSG00000022994	15	98589994	98607633	22	1
ENSMUSG00000022995	1	181896384	182019990	47	5
ENSMUSG00000023004	15	98931425	98934565	7	1
ENSMUSG00000023007	15	99295087	99317018	59	6
ENSMUSG00000023010	15	99392882	99410049	28	5
ENSMUSG00000023017	15	99670718	99701127	12	1
ENSMUSG00000023021	15	99734881	99772885	24	1
ENSMUSG00000023025	15	99970074	100016351	18	1
ENSMUSG00000023026	15	100038664	100219473	44	2
ENSMUSG00000023030	15	100387898	100425072	32	1
ENSMUSG00000023033	15	100870683	101045929	35	5
ENSMUSG00000023034	15	101266846	101274792	7	1
ENSMUSG00000023050	15	102497649	102517064	34	1
ENSMUSG00000023055	15	102706779	102722178	23	2
ENSMUSG00000023089	6	24518666	24528013	10	2
ENSMUSG00000023092	X	56731787	56793346	26	2
ENSMUSG00000023118	7	19024377	19054618	45	1
ENSMUSG00000023147	16	96145407	96157852	11	1
ENSMUSG00000023150	1	151344477	151364422	24	3
ENSMUSG00000023169	15	96571418	96642913	18	2
ENSMUSG00000023170	11	69913888	69916591	22	6
ENSMUSG00000023175	10	79704491	79711969	21	6
ENSMUSG00000023353	5	24452177	24502047	18	5
ENSMUSG00000023456	6	124810586	124814296	18	6
ENSMUSG00000023460	17	66494512	66519717	14	2
ENSMUSG00000023495	9	106453291	106464012	54	1
ENSMUSG00000023707	5	124112297	124115483	20	2
ENSMUSG00000023723	11	88204388	88211507	12	2
ENSMUSG00000023800	17	3326573	3519397	28	1
ENSMUSG00000023805	17	5941280	6044290	57	1
ENSMUSG00000023845	17	17527723	17624489	18	1
ENSMUSG00000023852	17	15704967	15772610	46	1
ENSMUSG00000023861	17	8282904	8297661	24	3
ENSMUSG00000023883	17	14945009	14961273	19	1
ENSMUSG00000023892	17	21450352	21465591	5	1
ENSMUSG00000023923	17	50733127	51179349	22	1
ENSMUSG00000023927 ENSMUSG00000103779	17	51736187	51833290	42	6
ENSMUSG00000023932	17	45391892	45433707	16	3
ENSMUSG00000023944	17	45567775	45573271	29	8
ENSMUSG00000023951	17	46016993	46032377	25	1
ENSMUSG00000023952	17	46161032	46169370	54	2
ENSMUSG00000023960	17	44078813	44086567	11	7
ENSMUSG00000023967	17	46110986	46128910	17	3
ENSMUSG00000023973	17	46735705	46752214	14	2
ENSMUSG00000023977	17	46928292	47010532	48	3
ENSMUSG00000023984 ENSMUSG00000090115 ENSMUSG00000092558	17	47611582	47686738	34	2
ENSMUSG00000023991	17	47867133	47924645	34	1
ENSMUSG00000024012	17	29332072	29347904	26	14
ENSMUSG00000024026	17	30592866	30612659	8	1
ENSMUSG00000024045	17	32303676	32321153	14	1
ENSMUSG00000024052	17	71182560	71249817	49	2
ENSMUSG00000024054	17	71344489	71475343	65	4
ENSMUSG00000024065	17	73804841	73832093	6	1
ENSMUSG00000024068	17	74338987	74391113	17	2
ENSMUSG00000024073	17	74528295	74703356	122	12
ENSMUSG00000024074	17	78200248	78376592	17	2
ENSMUSG00000024077	17	78649913	78737196	23	4
ENSMUSG00000024083	17	64281005	64331916	14	5
ENSMUSG00000024091	17	65580056	65613555	6	1
ENSMUSG00000024096	17	65848433	65885755	11	1
ENSMUSG00000024097	17	80200089	80207305	8	2
ENSMUSG00000024099	17	66078795	66101559	15	1
ENSMUSG00000024104	6	116208033	116262668	31	6
ENSMUSG00000024109	17	90033644	91092805	58	8
ENSMUSG00000024120	17	84705247	84790789	54	4
ENSMUSG00000024121	17	24163866	24169702	15	2
ENSMUSG00000024122	17	24073680	24150924	36	1
ENSMUSG00000024127	17	85063477	85090267	15	3
ENSMUSG00000024140	17	86753907	86833410	16	1
ENSMUSG00000024160	17	24886643	24892152	25	1
ENSMUSG00000024163 ENSMUSG00000073436	17	24888486	24936977	111	12
ENSMUSG00000024188	17	26252910	26285504	31	4
ENSMUSG00000024201	17	56326062	56402870	36	2
ENSMUSG00000024212	17	56892612	56935388	12	2
ENSMUSG00000024213	17	27579382	27623465	20	7
ENSMUSG00000024220	17	28177207	28205886	33	1
ENSMUSG00000024238	18	5591860	5775467	32	3
ENSMUSG00000024242	17	80580512	80728093	36	2
ENSMUSG00000024253	17	84626496	84655558	13	2
ENSMUSG00000024261	18	31437808	31447415	4	1
ENSMUSG00000024268	18	25477632	25753983	14	4
ENSMUSG00000024269	18	25127223	25169007	9	1
ENSMUSG00000024270	18	24579881	24603817	17	1
ENSMUSG00000024271	18	24603961	24638830	22	3
ENSMUSG00000024277	18	23752333	23893861	22	2
ENSMUSG00000024283	18	7868832	7973547	55	4
ENSMUSG00000024294	18	10725548	10818704	34	3
ENSMUSG00000024298	17	32771236	32788287	8	1
ENSMUSG00000024302	18	23415415	23659714	22	3
ENSMUSG00000024319	17	33955812	33966984	30	3
ENSMUSG00000024335	17	34112023	34122634	44	5
ENSMUSG00000024370	18	34630951	34651735	33	1
ENSMUSG00000024381	18	32377217	32435736	19	5
ENSMUSG00000024384	18	32067734	32104331	14	2
ENSMUSG00000024387	17	35116196	35122053	26	2
ENSMUSG00000024392	17	35135178	35147322	63	2
ENSMUSG00000024393	17	35149076	35164897	44	2
ENSMUSG00000024400	18	31804057	31908987	23	3
ENSMUSG00000024403	17	35233660	35238767	14	1
ENSMUSG00000024411	18	15389394	15403684	5	1
ENSMUSG00000024413	18	12189693	12236400	35	2
ENSMUSG00000024422	17	35879819	35892670	36	2
ENSMUSG00000024429	17	35979851	35989462	14	1
ENSMUSG00000024454	18	37935844	37954988	25	1
ENSMUSG00000024456	18	37843601	37935476	44	4
ENSMUSG00000024462	17	37045966	37075067	44	7
ENSMUSG00000024474	18	36744656	36757639	20	1
ENSMUSG00000024493	18	42202350	42262122	32	5
ENSMUSG00000024500	18	42637432	43059471	22	2
ENSMUSG00000024502	18	43531408	43687773	22	1
ENSMUSG00000024516	18	65800549	65817665	21	2
ENSMUSG00000024524	18	67088336	67226792	13	2
ENSMUSG00000024544	18	67933257	68255549	6	2
ENSMUSG00000024561	18	74268272	74282685	15	1
ENSMUSG00000024563	18	76241580	76305731	22	1
ENSMUSG00000024566	18	80734143	80934058	29	3
ENSMUSG00000024571 ENSMUSG00000057130	18	80206765	80223533	32	1
ENSMUSG00000024576	18	61555274	61590061	32	5
ENSMUSG00000024581	18	62977836	62999450	28	1
ENSMUSG00000024583	18	63662801	63692359	8	1
ENSMUSG00000024587	18	64499665	64516557	15	2
ENSMUSG00000024589	18	64887756	65217826	32	2
ENSMUSG00000024597	18	57878678	57946821	27	2
ENSMUSG00000024604	18	60560736	60572810	20	1
ENSMUSG00000024608	18	60774510	60778546	16	1
ENSMUSG00000024617	18	60925618	60988152	30	2
ENSMUSG00000024639	19	16132831	16387463	11	2
ENSMUSG00000024640	19	15904678	15947337	22	1
ENSMUSG00000024665	19	10064164	10101503	12	1
ENSMUSG00000024735	19	10895231	10909559	34	3
ENSMUSG00000024736	19	10857822	10869940	14	1
ENSMUSG00000024740	19	10605625	10629813	27	9
ENSMUSG00000024743	19	10389090	10453181	12	2
ENSMUSG00000024759	19	7494040	7538608	14	2
ENSMUSG00000024777	19	6227765	6235872	20	2
ENSMUSG00000024781	19	34492318	34527474	11	1
ENSMUSG00000024789	19	29251828	29313080	25	1
ENSMUSG00000024811	19	36834232	36893477	44	1
ENSMUSG00000024817	19	30030513	30093722	29	2
ENSMUSG00000024835	19	4148619	4154035	26	1
ENSMUSG00000024843	19	3851773	3894369	40	2
ENSMUSG00000024847	19	4114446	4125858	16	1
ENSMUSG00000024851	19	4099998	4113965	50	12
ENSMUSG00000024853	19	5273923	5295455	21	5
ENSMUSG00000024858	19	4286001	4306222	46	6
ENSMUSG00000024870	19	5099207	5106996	6	1
ENSMUSG00000024873	19	5092871	5098418	6	1
ENSMUSG00000024878	19	24919916	24961616	15	1
ENSMUSG00000024883	19	5050808	5057071	10	3
ENSMUSG00000024900	19	3323301	3385732	19	1
ENSMUSG00000024901	19	4930651	4943127	20	1
ENSMUSG00000024902	19	4962306	4966995	5	1
ENSMUSG00000024908	19	3454933	3575749	25	3
ENSMUSG00000024911	19	5460607	5465052	10	2
ENSMUSG00000024914	19	5422805	5424979	30	3
ENSMUSG00000024921	19	26605115	26778321	68	8
ENSMUSG00000024924	19	27216484	27254231	35	2
ENSMUSG00000024935	19	28835049	28913960	20	3
ENSMUSG00000024941	19	5758427	5771401	17	2
ENSMUSG00000024944	19	6134374	6141406	10	3
ENSMUSG00000024947	19	6334979	6340891	37	1
ENSMUSG00000024949	19	6363690	6378030	43	7
ENSMUSG00000024953	19	6906697	6910106	15	2
ENSMUSG00000024958	19	6938069	6942450	17	1
ENSMUSG00000024966	19	7020696	7040026	14	1
ENSMUSG00000024969	19	7275396	7341860	69	2
ENSMUSG00000024974	19	53600398	53645833	33	2
ENSMUSG00000024975	19	53892231	53929861	15	2
ENSMUSG00000024978	19	55069734	55099451	21	1
ENSMUSG00000024981	19	55253369	55296627	22	4
ENSMUSG00000024982	19	55298301	55316032	11	5
ENSMUSG00000024983	19	55316351	55626561	8	4
ENSMUSG00000024991	19	60761116	60790693	22	11
ENSMUSG00000024997	19	60864051	60874556	7	1
ENSMUSG00000024999	19	38788128	38819237	21	1
ENSMUSG00000025016	19	41210842	41264004	15	3
ENSMUSG00000025020	19	41600257	41743665	46	3
ENSMUSG00000025026	19	53140445	53247399	18	2
ENSMUSG00000025041	19	46886831	47015153	23	1
ENSMUSG00000025060	19	47579678	47645246	28	2
ENSMUSG00000025085	19	57032733	57314919	69	2
ENSMUSG00000025092	19	58795751	58860984	12	1
ENSMUSG00000025103	7	81792075	81829431	8	2
ENSMUSG00000025104	7	81881251	81934473	10	2
ENSMUSG00000025130	11	120560298	120573253	17	1
ENSMUSG00000025132	11	120578104	120581624	8	1
ENSMUSG00000025134	11	120592121	120598365	11	2
ENSMUSG00000025145	11	120713925	120721128	30	1
ENSMUSG00000025151	X	94535474	94542143	29	1
ENSMUSG00000025153	11	120805940	120824178	47	4
ENSMUSG00000025155	11	120789201	120796403	35	2
ENSMUSG00000025156	11	120784272	120789102	27	5
ENSMUSG00000025190	19	43499752	43524605	16	1
ENSMUSG00000025199	19	44073335	44107480	37	2
ENSMUSG00000025203 ENSMUSG00000093315	19	44293676	44306864	8	3
ENSMUSG00000025212	19	45047576	45056383	14	4
ENSMUSG00000025217	19	45363734	45533341	15	2
ENSMUSG00000025220	19	45750261	45783520	16	3
ENSMUSG00000025221	19	45791839	45816061	27	4
ENSMUSG00000025223	19	46032593	46045214	27	5
ENSMUSG00000025224	19	46152509	46286510	73	3
ENSMUSG00000025232	9	59539667	59565105	14	5
ENSMUSG00000025234	9	59388258	59486618	27	1
ENSMUSG00000025235	9	59321966	59353508	16	3
ENSMUSG00000025246	X	77511013	77662983	23	1
ENSMUSG00000025264	X	151087094	151096543	10	1
ENSMUSG00000025266	X	150983141	151017322	27	10
ENSMUSG00000025272	X	150645304	150657583	32	6
ENSMUSG00000025290	14	24490681	24496146	6	3
ENSMUSG00000025314	2	90429754	90580647	31	1
ENSMUSG00000025316	8	121949750	122029258	49	4
ENSMUSG00000025332	X	152233020	152274535	40	2
ENSMUSG00000025369	10	128459236	128490173	30	10
ENSMUSG00000025371	11	119913441	119919548	20	2
ENSMUSG00000025372	11	119942763	120006782	27	1
ENSMUSG00000025373	10	128411616	128441438	9	2
ENSMUSG00000025374	10	128401395	128411492	28	3
ENSMUSG00000025375	11	120007313	120047167	30	2
ENSMUSG00000025393	10	128083273	128090391	29	10
ENSMUSG00000025404	10	127380327	127499384	66	12
ENSMUSG00000025408	10	127290774	127296288	8	1
ENSMUSG00000025410	10	127266262	127281959	14	8
ENSMUSG00000025417	10	127197067	127211622	10	4
ENSMUSG00000025422	10	127078907	127093169	19	4
ENSMUSG00000025428	18	77773729	77782869	24	8
ENSMUSG00000025437	3	152346478	152393612	35	2
ENSMUSG00000025439	7	97696634	97718879	9	3
ENSMUSG00000025451	13	119428601	119458218	26	1
ENSMUSG00000025453	13	119335448	119408997	20	2
ENSMUSG00000025466	7	140096770	140102441	32	2
ENSMUSG00000025474	7	139995955	140036350	18	1
ENSMUSG00000025477	7	139389109	139579652	26	1
ENSMUSG00000025484	7	140853384	140856383	4	1
ENSMUSG00000025485	7	140856957	140863730	31	7
ENSMUSG00000025486	7	140863670	140882309	13	2
ENSMUSG00000025487	7	140881968	140898643	40	3
ENSMUSG00000025499	7	141189105	141194005	23	1
ENSMUSG00000025503	7	141392199	141402968	13	2
ENSMUSG00000025512	7	141493136	141539857	34	3
ENSMUSG00000025551	14	123977907	124677127	7	2
ENSMUSG00000025555	14	121035200	121283744	33	1
ENSMUSG00000025558	14	121542039	121797734	56	1
ENSMUSG00000025571	11	117654289	117763439	34	2
ENSMUSG00000025575	11	118406289	118419086	14	1
ENSMUSG00000025576	11	118489762	118911597	31	1
ENSMUSG00000025591	8	66474330	66486530	13	1
ENSMUSG00000025607	6	30747554	30896794	37	1
ENSMUSG00000025609	6	31398735	31516811	43	1
ENSMUSG00000025613	16	87483326	87495873	36	4
ENSMUSG00000025626	X	52912266	52956943	18	1
ENSMUSG00000025656	X	95048935	95196821	42	4
ENSMUSG00000025658	X	157821436	158043294	25	5
ENSMUSG00000025666	X	81070698	81097872	10	1
ENSMUSG00000025723 ENSMUSG00000025724	7	80902227	80947780	34	5
ENSMUSG00000025733 ENSMUSG00000093593 ENSMUSG00000025735 ENSMUSG00000073434	17	25834465	25861501	155	7
ENSMUSG00000025757	3	40744495	40796103	34	1
ENSMUSG00000025766	3	41742611	41803320	41	1
ENSMUSG00000025776	1	17727045	17766344	21	1
ENSMUSG00000025777	1	17145362	17164271	16	3
ENSMUSG00000025781	2	10056016	10080510	25	8
ENSMUSG00000025793	11	120467635	120483984	32	5
ENSMUSG00000025794	9	120571517	120574653	6	3
ENSMUSG00000025812	8	127063893	127612286	71	1
ENSMUSG00000025813	7	81600481	81706925	10	2
ENSMUSG00000025816	2	5870987	5895432	32	3
ENSMUSG00000025854	5	138754514	138810077	19	2
ENSMUSG00000025856	5	138976014	138997370	21	1
ENSMUSG00000025870	13	54575015	54581128	10	1
ENSMUSG00000025873	13	54621784	54664068	27	4
ENSMUSG00000025885	18	74440936	74771493	61	1
ENSMUSG00000025899	9	3335478	3387050	14	1
ENSMUSG00000025907	1	6206197	6276648	60	2
ENSMUSG00000025909	1	8361475	9299878	42	1
ENSMUSG00000025917	1	10024601	10038168	22	1
ENSMUSG00000025920	1	16228674	16520112	47	3
ENSMUSG00000025933	1	21218575	21230167	8	1
ENSMUSG00000025935	1	13564698	13589910	15	1
ENSMUSG00000025949	1	65186683	65278695	66	4
ENSMUSG00000025950	1	65158616	65186500	23	2
ENSMUSG00000025958	1	64532645	64604548	31	1
ENSMUSG00000025959	1	64029447	64122282	10	1
ENSMUSG00000025964	1	63445891	63596276	46	8
ENSMUSG00000025968	1	63143596	63176833	50	2
ENSMUSG00000025969	1	62703285	62818695	22	1
ENSMUSG00000025979	1	55131231	55154899	23	1
ENSMUSG00000025980	1	55077835	55088243	15	2
ENSMUSG00000025982	1	54985169	55027481	43	2
ENSMUSG00000025995	1	45795166	45823619	39	1
ENSMUSG00000026018	1	59982490	60043184	27	2
ENSMUSG00000026019	1	60069785	60098645	28	3
ENSMUSG00000026021	1	59586558	59670834	11	7
ENSMUSG00000026024 ENSMUSG00000079550	1	59120935	59237231	88	1
ENSMUSG00000026028	1	58900449	58973430	25	4
ENSMUSG00000026034	1	58410189	58424066	33	4
ENSMUSG00000026074	1	39900913	40026310	66	3
ENSMUSG00000026080	1	38863867	38898161	26	1
ENSMUSG00000026082	1	38052786	38129801	50	1
ENSMUSG00000026083	1	37998010	38055579	35	3
ENSMUSG00000026090	1	37611677	37720085	15	1
ENSMUSG00000026095 ENSMUSG00000101838 ENSMUSG00000099913	1	53325507	53352752	24	1
ENSMUSG00000026103	1	52163448	52233232	53	4
ENSMUSG00000026113	1	37299865	37410736	54	6
ENSMUSG00000026131 ENSMUSG00000103888 ENSMUSG00000103405	1	33908225	34308661	145	15
ENSMUSG00000026150	1	82724890	82752394	39	5
ENSMUSG00000026153	1	24011093	24100341	43	1
ENSMUSG00000026155	1	23844846	23922317	25	1
ENSMUSG00000026158	1	23366424	23397772	14	2
ENSMUSG00000026159 ENSMUSG00000093782	1	82839446	82901182	31	1
ENSMUSG00000026193	1	71585520	71653200	73	1
ENSMUSG00000026202	1	75214228	75219865	19	4
ENSMUSG00000026203	1	75236406	75245692	34	1
ENSMUSG00000026204	1	75247027	75264502	34	2
ENSMUSG00000026219	1	84721189	84840516	80	4
ENSMUSG00000026234 ENSMUSG00000064837 ENSMUSG00000064696	1	86344719	86359400	31	3
ENSMUSG00000026235	1	77367185	77515088	28	2
ENSMUSG00000026238	1	86526726	86530712	16	3
ENSMUSG00000026248	1	79776018	79781445	6	1
ENSMUSG00000026254	1	87213914	87240488	19	2
ENSMUSG00000026276	1	93478964	93510260	43	4
ENSMUSG00000026277	1	93619751	93658659	24	3
ENSMUSG00000026280	1	93751500	93790610	35	3
ENSMUSG00000026305	1	90998737	91128944	49	2
ENSMUSG00000026313	1	91928779	92180341	46	1
ENSMUSG00000026342	1	125560595	125595820	21	1
ENSMUSG00000026344	1	125867622	125913101	11	4
ENSMUSG00000026349	1	127774164	127808061	19	1
ENSMUSG00000026353	1	128243964	128279378	20	2
ENSMUSG00000026356	1	128363707	128417368	20	2
ENSMUSG00000026361	1	143598800	143702893	25	4
ENSMUSG00000026365	1	140084708	140183764	36	1
ENSMUSG00000026411	1	136008150	136035342	15	1
ENSMUSG00000026434	1	131910534	131936321	12	3
ENSMUSG00000026437	1	132112237	132139684	27	1
ENSMUSG00000026439	1	132477365	132505659	29	4
ENSMUSG00000026442	1	132564690	132741797	51	2
ENSMUSG00000026458	1	134296783	134332928	39	2
ENSMUSG00000026470	1	155158715	155208256	28	2
ENSMUSG00000026473 ENSMUSG00000099227	1	153899926	153909723	17	3
ENSMUSG00000026478	1	153218922	153332786	37	1
ENSMUSG00000026482	1	152516760	152766351	29	4
ENSMUSG00000026490	1	179960472	180165603	74	8
ENSMUSG00000026509	1	182467260	182517608	33	1
ENSMUSG00000026516	1	181087138	181144204	33	2
ENSMUSG00000026527	1	175059087	175492500	34	2
ENSMUSG00000026553	1	172082529	172122330	56	6
ENSMUSG00000026554	1	172148084	172197005	39	4
ENSMUSG00000026563	1	166379097	166393621	15	1
ENSMUSG00000026568	1	165460637	165481214	14	1
ENSMUSG00000026576	1	164437109	164458355	11	2
ENSMUSG00000026577	1	164289800	164307489	18	1
ENSMUSG00000026585	1	163779583	163917109	21	4
ENSMUSG00000026587	1	158362273	158691781	48	1
ENSMUSG00000026594	1	156804166	156939626	50	1
ENSMUSG00000026596	1	156558786	156649568	20	1
ENSMUSG00000026604	1	189728268	189876695	29	1
ENSMUSG00000026608	1	188971095	189007841	39	2
ENSMUSG00000026615	1	185363044	185428360	49	2
ENSMUSG00000026618	1	185284726	185329396	32	4
ENSMUSG00000026623	1	191717834	191784255	17	1
ENSMUSG00000026626	1	191351975	191403272	31	1
ENSMUSG00000026634	1	190925112	190946962	25	1
ENSMUSG00000026638 ENSMUSG00000079144	1	193153111	193177832	32	1
ENSMUSG00000026640	1	194618218	194816869	41	3
ENSMUSG00000026641 ENSMUSG00000103711	1	171411313	171420352	40	2
ENSMUSG00000026662	2	4881564	4910557	15	1
ENSMUSG00000026667	1	170193420	170215397	9	2
ENSMUSG00000026687	1	167349991	167368532	18	1
ENSMUSG00000026718	2	14074098	14149634	31	1
ENSMUSG00000026721	1	160219174	160793211	58	7
ENSMUSG00000026737	2	18842255	18998126	14	1
ENSMUSG00000026740	2	18195654	18392830	33	2
ENSMUSG00000026748	2	16356304	16755839	21	2
ENSMUSG00000026750	2	38588036	38644087	10	1
ENSMUSG00000026754	2	39016261	39065541	46	2
ENSMUSG00000026764	2	49619298	49774778	37	4
ENSMUSG00000026775	2	23156369	23199260	29	1
ENSMUSG00000026782	1	60409619	60481158	36	6
ENSMUSG00000026787	2	22622205	22693874	18	1
ENSMUSG00000026790	2	29889221	29931746	68	12
ENSMUSG00000026797	2	32787602	32847239	27	1
ENSMUSG00000026811	2	32599709	32620806	29	1
ENSMUSG00000026817	2	32621758	32635058	19	1
ENSMUSG00000026819	2	32414487	32451445	32	4
ENSMUSG00000026821	2	28513125	28553081	42	1
ENSMUSG00000026824	2	55435970	55598145	8	1
ENSMUSG00000026825	2	32308471	32353329	50	15
ENSMUSG00000026827	2	57237635	57370719	28	1
ENSMUSG00000026833	2	28192992	28230736	10	1
ENSMUSG00000026843	2	31572651	31617526	45	2
ENSMUSG00000026857	2	30807826	30823033	24	1
ENSMUSG00000026860	2	30344809	30359337	39	2
ENSMUSG00000026864	2	34771970	34777547	22	5
ENSMUSG00000026867	2	34676184	34755232	59	3
ENSMUSG00000026878	2	35180205	35201120	22	2
ENSMUSG00000026879	2	35279663	35307892	21	2
ENSMUSG00000026883	2	35558266	35730994	41	3
ENSMUSG00000026895	2	36036326	36049406	4	2
ENSMUSG00000026904	2	62046462	62326730	37	2
ENSMUSG00000026914	2	61711694	61800376	27	3
ENSMUSG00000026915	2	37483228	37703859	33	1
ENSMUSG00000026927	2	26382802	26389316	33	2
ENSMUSG00000026930	2	26315515	26348237	34	5
ENSMUSG00000026932	2	26055535	26123220	24	1
ENSMUSG00000026933	2	25926838	25983282	42	2
ENSMUSG00000026944	2	25428703	25448540	65	2
ENSMUSG00000026959	2	25291181	25319187	42	5
ENSMUSG00000026970	2	60750193	60963192	29	1
ENSMUSG00000026986	2	24002910	24049394	11	1
ENSMUSG00000026987	2	59899363	60209839	70	1
ENSMUSG00000026991	2	59160850	59355208	50	4
ENSMUSG00000027002	2	80500512	80581380	41	3
ENSMUSG00000027006	2	80315466	80354043	31	2
ENSMUSG00000027010	2	71271063	71367749	28	7
ENSMUSG00000027011	2	78868124	78921293	19	1
ENSMUSG00000027012	2	71211706	71263303	40	1
ENSMUSG00000027030	2	68210445	68472268	31	7
ENSMUSG00000027035	2	68861441	69114282	23	1
ENSMUSG00000027067	2	85037234	85047109	33	6
ENSMUSG00000027080	2	84678402	84688215	8	3
ENSMUSG00000027087	2	83724397	83806916	46	2
ENSMUSG00000027091	2	83644435	83664622	21	1
ENSMUSG00000027104 ENSMUSG00000099302	2	73816509	73892639	47	11
ENSMUSG00000027108	2	73092801	73218924	21	1
ENSMUSG00000027131	2	112363011	112368027	8	3
ENSMUSG00000027180	2	104027721	104063240	22	1
ENSMUSG00000027184	2	103762941	103797649	52	11
ENSMUSG00000027187	2	103453849	103485160	17	1
ENSMUSG00000027193	2	94411682	94438136	22	5
ENSMUSG00000027195	2	94032689	94157964	19	1
ENSMUSG00000027200	2	124089969	124667770	40	2
ENSMUSG00000027201	2	125084628	125123661	34	1
ENSMUSG00000027206	2	125830304	125859139	24	4
ENSMUSG00000027210	2	115863064	116065839	45	7
ENSMUSG00000027220	2	92915098	92956058	6	1
ENSMUSG00000027221	2	92599707	92615250	3	1
ENSMUSG00000027223	2	92383676	92401263	16	1
ENSMUSG00000027244	2	91674618	91710576	29	1
ENSMUSG00000027245 ENSMUSG00000074884	2	121449195	121458672	35	1
ENSMUSG00000027248	2	121413775	121438687	19	1
ENSMUSG00000027253	2	91457511	91513779	46	1
ENSMUSG00000027254	2	121289600	121310832	13	1
ENSMUSG00000027255	2	91264974	91276931	28	1
ENSMUSG00000027270	2	136052239	136069917	15	1
ENSMUSG00000027273	2	136713453	136782428	13	5
ENSMUSG00000027282	2	90847155	90866810	36	6
ENSMUSG00000027288	2	120506820	120563843	45	5
ENSMUSG00000027291	2	120316461	120353137	48	3
ENSMUSG00000027298	2	119797733	119818104	36	3
ENSMUSG00000027303	2	130450278	130554026	24	3
ENSMUSG00000027304	2	119675068	119735407	26	2
ENSMUSG00000027305	2	119655446	119662827	15	1
ENSMUSG00000027312	2	130906495	131030333	37	4
ENSMUSG00000027327	2	131146324	131160081	19	1
ENSMUSG00000027339	2	131989415	132030258	23	1
ENSMUSG00000027340	2	132052496	132145108	29	4
ENSMUSG00000027346	2	132529082	132587729	38	1
ENSMUSG00000027347	2	117279993	117343001	25	6
ENSMUSG00000027350	2	132781278	132795079	5	1
ENSMUSG00000027357	2	132846666	132866785	15	1
ENSMUSG00000027363	2	126707328	126759297	26	2
ENSMUSG00000027374	2	127587222	127606829	24	2
ENSMUSG00000027375	2	127633226	127656695	6	1
ENSMUSG00000027397	2	129198764	129211616	29	3
ENSMUSG00000027405 ENSMUSG00000065289 ENSMUSG00000093645 ENSMUSG00000065287 ENSMUSG00000065272	2	130274430	130279313	68	3
ENSMUSG00000027406	2	130279309	130284547	21	5
ENSMUSG00000027419	2	143546156	143816285	14	2
ENSMUSG00000027422	2	143947395	144011263	36	1
ENSMUSG00000027423	2	144250123	144270906	32	1
ENSMUSG00000027425 ENSMUSG00000098387	2	144368983	144407676	37	1
ENSMUSG00000027430	2	144599897	144768758	15	1
ENSMUSG00000027433	2	147012996	147078000	36	2
ENSMUSG00000027438	2	148693985	148732467	15	4
ENSMUSG00000027455	2	151494182	151511414	30	3
ENSMUSG00000027457	2	151590549	151632593	28	3
ENSMUSG00000027466	2	152316334	152332653	28	1
ENSMUSG00000027472	2	153008890	153015427	21	1
ENSMUSG00000027479	2	153741274	153773310	11	2
ENSMUSG00000027489	2	154544399	154558890	27	1
ENSMUSG00000027499	3	7366669	7445366	7	2
ENSMUSG00000027502	2	172440556	172469908	12	1
ENSMUSG00000027506	3	8925593	9004723	29	2
ENSMUSG00000027519	2	173659760	173707343	11	1
ENSMUSG00000027520	1	63273265	63314576	12	1
ENSMUSG00000027522	2	174076308	174099771	22	1
ENSMUSG00000027523	2	174284320	174346744	46	5
ENSMUSG00000027524	2	174760619	174784042	13	1
ENSMUSG00000027525	2	178118975	178338492	24	1
ENSMUSG00000027546	2	168634438	168742409	48	4
ENSMUSG00000027568	2	180499976	180544980	8	1
ENSMUSG00000027575	2	180967225	180982526	47	2
ENSMUSG00000027593 ENSMUSG00000027596	2	154791096	155051012	45	1
ENSMUSG00000027598	2	155133509	155226855	36	3
ENSMUSG00000027599	3	19131402	19163065	7	3
ENSMUSG00000027602	2	155276297	155278073	8	1
ENSMUSG00000027603	2	155490379	155518237	26	6
ENSMUSG00000027615	3	19995945	20035315	38	1
ENSMUSG00000027618 ENSMUSG00000074643 ENSMUSG00000098950 ENSMUSG00000089824	2	156071842	156144186	101	6
ENSMUSG00000027620	2	156147239	156180238	69	8
ENSMUSG00000027624	2	156420909	156543214	44	5
ENSMUSG00000027630	3	22076652	22216594	19	1
ENSMUSG00000027634	2	156927345	156992056	40	4
ENSMUSG00000027637	2	156863128	156873563	10	4
ENSMUSG00000027642	2	157279017	157326319	38	5
ENSMUSG00000027646	2	157418444	157471862	30	2
ENSMUSG00000027652	2	158409848	158499253	51	2
ENSMUSG00000027660	3	31095058	31122577	21	3
ENSMUSG00000027665	3	32397671	32468486	27	2
ENSMUSG00000027667	3	32510259	32520833	28	2
ENSMUSG00000027673	3	32736990	32751566	23	1
ENSMUSG00000027674	3	32949408	33143247	35	1
ENSMUSG00000027677 ENSMUSG00000104357	3	33800195	33816634	16	2
ENSMUSG00000027678	2	165992636	166073242	33	1
ENSMUSG00000027692	3	28263214	28675858	55	10
ENSMUSG00000027706	3	30792875	30821263	14	1
ENSMUSG00000027712	3	36448926	36475887	13	1
ENSMUSG00000027714	3	36552606	36565729	31	1
ENSMUSG00000027737	3	49892526	50443614	21	3
ENSMUSG00000027763	3	60472830	60629750	60	3
ENSMUSG00000027774	3	67430096	67476529	22	1
ENSMUSG00000027778	3	68892499	69004570	46	2
ENSMUSG00000027782	3	69067149	69127113	21	3
ENSMUSG00000027787	3	69721985	69756373	28	6
ENSMUSG00000027797	3	55242526	55539064	21	3
ENSMUSG00000027799	3	55625205	56183701	58	9
ENSMUSG00000027804	3	79591342	79603650	23	1
ENSMUSG00000027805	3	57841895	57847564	9	1
ENSMUSG00000027810	3	58525821	58557501	25	4
ENSMUSG00000027828	3	65379655	65392623	10	3
ENSMUSG00000027852	3	103058339	103067914	14	2
ENSMUSG00000027881	3	108902667	108911727	19	2
ENSMUSG00000027893	3	107663118	107696560	34	3
ENSMUSG00000027894	3	107467543	107518018	37	4
ENSMUSG00000027933	3	90391380	90433636	32	3
ENSMUSG00000027937	3	90231597	90235838	13	1
ENSMUSG00000027940	3	90072649	90100902	42	2
ENSMUSG00000027944	3	89995457	89998686	7	3
ENSMUSG00000027951	3	89715022	89753446	24	1
ENSMUSG00000027952	3	89459118	89469013	11	1
ENSMUSG00000027957 ENSMUSG00000089911	3	116631164	116712831	36	3
ENSMUSG00000027965	3	114904078	115125722	10	2
ENSMUSG00000027993	3	84160439	84305446	48	5
ENSMUSG00000027998	3	83055522	83072355	26	1
ENSMUSG00000028005	3	82032004	82074711	22	5
ENSMUSG00000028020	3	80843599	80913660	21	5
ENSMUSG00000028029	3	132660498	132683879	7	1
ENSMUSG00000028030	3	132684144	132838506	27	2
ENSMUSG00000028034	3	152210458	152236830	26	1
ENSMUSG00000028035	3	152178511	152210279	15	1
ENSMUSG00000028041	3	89338542	89349996	54	3
ENSMUSG00000028048	3	89202928	89208681	14	1
ENSMUSG00000028057	3	88716838	88731049	25	7
ENSMUSG00000028059	3	88607454	88648052	92	1
ENSMUSG00000028078	3	86786151	86920852	45	3
ENSMUSG00000028080	3	86224680	86782692	66	2
ENSMUSG00000028082	3	85971109	86130526	35	2
ENSMUSG00000028086	3	84815268	84979198	23	1
ENSMUSG00000028114	3	123364645	123385990	20	1
ENSMUSG00000028126	3	95058530	95106930	30	1
ENSMUSG00000028132	3	121201761	121283098	23	1
ENSMUSG00000028134	3	119718742	119783388	14	4
ENSMUSG00000028140	3	94443336	94448708	7	1
ENSMUSG00000028180	3	157534160	157548390	24	2
ENSMUSG00000028184	3	148815586	148989316	29	6
ENSMUSG00000028207	4	9448069	9669344	45	1
ENSMUSG00000028221	4	14864076	14915176	7	1
ENSMUSG00000028232	4	3549041	3574853	20	2
ENSMUSG00000028233	4	3574875	3616619	22	1
ENSMUSG00000028246	4	21931329	21996839	14	1
ENSMUSG00000028248	4	21847583	21876475	44	2
ENSMUSG00000028249	4	6365650	6408423	25	3
ENSMUSG00000028251	4	21757382	21767212	4	1
ENSMUSG00000028266	3	144188530	144205220	15	2
ENSMUSG00000028273	3	142239586	142395696	22	1
ENSMUSG00000028282	4	32615451	32653265	19	1
ENSMUSG00000028289	4	28813131	28967499	32	2
ENSMUSG00000028292	4	34614957	34660167	34	1
ENSMUSG00000028309	4	49632006	49656887	39	2
ENSMUSG00000028347	4	48585174	48663131	17	1
ENSMUSG00000028351	4	68761514	68954397	11	1
ENSMUSG00000028373	4	65380803	66404611	24	1
ENSMUSG00000028393	4	62509169	62519918	16	1
ENSMUSG00000028397	4	74242497	74405860	29	1
ENSMUSG00000028399	4	75941238	78211961	82	6
ENSMUSG00000028402	4	81278500	81442815	68	9
ENSMUSG00000028409	4	40736542	40757923	18	1
ENSMUSG00000028414	4	53713998	53765785	16	2
ENSMUSG00000028419	4	40948407	40965303	8	2
ENSMUSG00000028426	4	55350043	55392237	17	1
ENSMUSG00000028430	4	41114427	41124455	34	2
ENSMUSG00000028431	4	56749680	56802331	47	2
ENSMUSG00000028433 ENSMUSG00000093562	4	41194313	41275144	46	3
ENSMUSG00000028447	4	41714798	41723170	11	4
ENSMUSG00000028452	4	42979963	43000507	27	1
ENSMUSG00000028456	4	43058953	43264871	73	1
ENSMUSG00000028465	4	43531519	43562691	75	2
ENSMUSG00000028469	4	43631935	43651244	43	1
ENSMUSG00000028478	4	44004452	44032846	14	4
ENSMUSG00000028484	4	83455680	83486459	28	9
ENSMUSG00000028488	4	85205126	85639195	20	1
ENSMUSG00000028514	4	106316213	106441322	77	3
ENSMUSG00000028517	4	105157347	105232764	6	1
ENSMUSG00000028519	4	103619359	104744844	32	1
ENSMUSG00000028522	4	103114390	103165754	45	3
ENSMUSG00000028524	4	102741297	102973628	55	13
ENSMUSG00000028528	4	101496648	101642799	33	4
ENSMUSG00000028530	4	101152367	101265282	43	6
ENSMUSG00000028532	4	100776675	101029220	32	1
ENSMUSG00000028542	4	117834506	117875198	43	1
ENSMUSG00000028546	4	110203722	110351909	23	3
ENSMUSG00000028552	4	109280268	109387817	46	6
ENSMUSG00000028559	4	109061145	109202272	57	3
ENSMUSG00000028567	4	108834601	108862127	11	2
ENSMUSG00000028568	4	108814295	108833614	18	4
ENSMUSG00000028572	4	95967240	96025413	45	2
ENSMUSG00000028580	4	130663321	130781564	35	3
ENSMUSG00000028582	4	108619940	108634123	49	1
ENSMUSG00000028613	4	107802261	107876840	40	1
ENSMUSG00000028614	4	107367784	107416346	29	1
ENSMUSG00000028619	4	107134155	107179116	25	1
ENSMUSG00000028630	10	118859349	118868903	3	1
ENSMUSG00000028631	4	120696138	120748612	15	1
ENSMUSG00000028633	4	120539868	120570276	25	2
ENSMUSG00000028639	4	119277981	119294604	21	7
ENSMUSG00000028642 ENSMUSG00000078584	4	119203570	119232712	22	2
ENSMUSG00000028649	4	123349633	123684360	140	8
ENSMUSG00000028655	4	122946850	122961188	18	1
ENSMUSG00000028656	4	122859047	122886056	26	1
ENSMUSG00000028657	4	122836242	122859175	16	3
ENSMUSG00000028675	4	135870918	135873850	7	3
ENSMUSG00000028676	4	135855747	135869908	24	3
ENSMUSG00000028677	4	117271463	117497052	35	2
ENSMUSG00000028683	4	117019402	117087306	23	1
ENSMUSG00000028692	4	116636510	116651680	16	2
ENSMUSG00000028693	4	116601052	116627941	29	1
ENSMUSG00000028698	4	116221618	116303056	16	2
ENSMUSG00000028700	4	116123840	116159849	50	7
ENSMUSG00000028719	4	114959336	114987241	13	1
ENSMUSG00000028737 ENSMUSG00000041025 ENSMUSG00000094439 ENSMUSG00000028738	4	139530548	139670280	59	1
ENSMUSG00000028745	4	139192899	139291818	33	3
ENSMUSG00000028756 ENSMUSG00000099200 ENSMUSG00000098364	4	138313409	138326307	16	6
ENSMUSG00000028759	4	138216296	138244683	41	5
ENSMUSG00000028760	4	137993022	138208508	61	3
ENSMUSG00000028772	4	130315383	130359943	16	1
ENSMUSG00000028773	4	130308595	130315463	4	1
ENSMUSG00000028782	4	129984870	130022633	53	3
ENSMUSG00000028785	4	129111570	129122036	20	1
ENSMUSG00000028788	4	129811219	129850003	20	3
ENSMUSG00000028789	4	128930233	128962442	21	1
ENSMUSG00000028795	4	129619274	129623947	27	2
ENSMUSG00000028803	4	135445420	135495038	28	2
ENSMUSG00000028809	4	135320484	135353321	50	1
ENSMUSG00000028821	4	134930898	134937548	12	7
ENSMUSG00000028838	4	134356372	134383850	15	1
ENSMUSG00000028843	4	134127406	134128789	7	3
ENSMUSG00000028849	4	126232167	126256343	28	2
ENSMUSG00000028851	4	133532542	133545996	11	4
ENSMUSG00000028863	4	125085134	125113238	25	5
ENSMUSG00000028869	4	125016585	125055380	28	1
ENSMUSG00000028879	4	132853501	132884509	11	5
ENSMUSG00000028883	5	13396784	13602565	27	1
ENSMUSG00000028896 ENSMUSG00000085241 ENSMUSG00000064387	4	132331919	132353686	40	1
ENSMUSG00000028906	4	131923413	132075321	46	2
ENSMUSG00000028911	4	131873617	131901706	16	1
ENSMUSG00000028923	4	141066512	141078357	29	4
ENSMUSG00000028926	5	4803391	5420312	44	4
ENSMUSG00000028931 ENSMUSG00000089757	4	152390742	152477871	47	14
ENSMUSG00000028936	4	152325742	152334071	22	2
ENSMUSG00000028937	4	152178134	152271855	19	1
ENSMUSG00000028944	5	24862744	25100642	35	2
ENSMUSG00000028945	5	24802823	24842624	12	1
ENSMUSG00000028953	5	24565341	24577467	14	1
ENSMUSG00000028958	5	24445458	24447854	13	1
ENSMUSG00000028960	4	149328416	149426749	49	2
ENSMUSG00000028961	4	149149991	149166771	22	1
ENSMUSG00000028964	4	150897133	150914437	28	4
ENSMUSG00000028969	5	24418250	24423530	12	2
ENSMUSG00000028975	4	148960535	149099876	19	1
ENSMUSG00000028986	5	24100590	24161223	11	1
ENSMUSG00000028991	4	148448611	148557683	65	1
ENSMUSG00000028999	5	23787711	23820369	30	1
ENSMUSG00000029004	5	23434441	23504235	37	3
ENSMUSG00000029007	4	148077061	148088031	8	1
ENSMUSG00000029016	4	148004259	148038821	33	3
ENSMUSG00000029036	4	155740641	155761093	37	1
ENSMUSG00000029048	4	155074110	155086382	12	3
ENSMUSG00000029050	4	155154075	155222592	11	3
ENSMUSG00000029053	4	155260129	155361361	40	3
ENSMUSG00000029055	4	154983115	155056784	49	1
ENSMUSG00000029060	4	155654677	155669198	42	2
ENSMUSG00000029062	4	155624854	155649938	39	1
ENSMUSG00000029066	4	155802878	155809975	16	1
ENSMUSG00000029095	5	35757880	35884973	49	10
ENSMUSG00000029101	5	34949445	35039644	45	3
ENSMUSG00000029103	5	35091490	35105766	22	2
ENSMUSG00000029106 ENSMUSG00000099082	5	34573664	34632308	46	10
ENSMUSG00000029120	5	36868513	36955078	11	1
ENSMUSG00000029126	5	38137193	38159467	5	1
ENSMUSG00000029128	5	41624976	41708155	7	1
ENSMUSG00000029131	5	29735688	29786478	27	3
ENSMUSG00000029145	5	31187558	31193430	33	3
ENSMUSG00000029146	5	31193227	31198900	36	1
ENSMUSG00000029148	5	31240864	31251566	48	5
ENSMUSG00000029151	5	31086106	31108237	19	1
ENSMUSG00000029152	5	73292794	73314077	11	1
ENSMUSG00000029153	5	73322199	73338947	9	1
ENSMUSG00000029166	5	30814641	30866106	17	2
ENSMUSG00000029176	5	52834015	52867797	47	1
ENSMUSG00000029189	5	53107084	53213452	24	1
ENSMUSG00000029190 ENSMUSG00000029192	5	36490604	36696024	84	3
ENSMUSG00000029191	5	65261852	65335670	40	4
ENSMUSG00000029207	5	66298861	66618828	57	1
ENSMUSG00000029208	5	69556924	69575972	32	1
ENSMUSG00000029211	5	71569734	71658308	9	1
ENSMUSG00000029221	5	67306955	67358565	24	2
ENSMUSG00000029227	5	74535449	74598790	36	11
ENSMUSG00000029229	5	75001026	75044774	7	1
ENSMUSG00000029234 ENSMUSG00000083152	5	76183880	76209245	16	1
ENSMUSG00000029238	5	76212177	76304548	23	1
ENSMUSG00000029245	5	84057791	84417382	28	7
ENSMUSG00000029246	5	76913249	76951578	17	2
ENSMUSG00000029247	5	76951307	76967509	26	1
ENSMUSG00000029250	5	77310147	77349324	32	1
ENSMUSG00000029253	5	86012043	86065583	19	1
ENSMUSG00000029263	5	108312609	108349355	17	1
ENSMUSG00000029267	5	108065674	108109004	47	1
ENSMUSG00000029290	5	105876565	105915818	30	1
ENSMUSG00000029291	5	88583574	88642671	13	4
ENSMUSG00000029309	5	104079111	104114088	11	3
ENSMUSG00000029310	5	104046306	104065379	18	1
ENSMUSG00000029312	5	103861973	103911259	15	1
ENSMUSG00000029326	5	100039994	100068762	8	3
ENSMUSG00000029330	5	101765130	101823858	15	1
ENSMUSG00000029335	5	98854439	98880960	3	1
ENSMUSG00000029344	5	112276691	112315361	18	1
ENSMUSG00000029345	5	112326358	112338073	18	1
ENSMUSG00000029359	5	118027743	118061878	20	1
ENSMUSG00000029361	5	117781032	117958840	46	1
ENSMUSG00000029364	5	117357304	117378601	19	4
ENSMUSG00000029385	5	93267257	93276231	22	1
ENSMUSG00000029390	5	124540695	124550506	9	4
ENSMUSG00000029392	5	124493082	124531391	7	1
ENSMUSG00000029405	5	92052146	92083735	16	1
ENSMUSG00000029406	5	124118690	124249760	44	1
ENSMUSG00000029407	5	92137938	92202794	24	1
ENSMUSG00000029408	5	124061530	124095798	21	2
ENSMUSG00000029415	5	92284010	92310024	22	1
ENSMUSG00000029420	5	128760401	128953362	22	2
ENSMUSG00000029422	5	123728426	123749414	56	12
ENSMUSG00000029433	5	123509765	123524176	21	1
ENSMUSG00000029438	5	123343834	123374082	11	3
ENSMUSG00000029439	5	129501231	129571383	18	2
ENSMUSG00000029442	5	123252102	123327484	35	1
ENSMUSG00000029447 ENSMUSG00000093413	5	129787439	129845820	17	4
ENSMUSG00000029449	5	123103044	123132692	11	1
ENSMUSG00000029458	5	121660563	121687248	24	2
ENSMUSG00000029463	5	122364580	122372364	7	1
ENSMUSG00000029465	5	122391878	122406179	20	6
ENSMUSG00000029467	5	122442702	122502225	23	7
ENSMUSG00000029469	5	122550204	122614518	32	1
ENSMUSG00000029472	5	122787469	122821339	17	1
ENSMUSG00000029474	5	122850188	122868945	6	1
ENSMUSG00000029478	5	125017153	125179219	75	2
ENSMUSG00000029482	5	125475814	125517412	22	2
ENSMUSG00000029502	5	110176701	110226470	35	3
ENSMUSG00000029516	5	115845278	116008947	87	5
ENSMUSG00000029547	5	139751282	139775678	47	3
ENSMUSG00000029571	6	13069759	13089269	20	1
ENSMUSG00000029577	5	114380628	114421168	33	2
ENSMUSG00000029580	5	142903115	142906754	26	2
ENSMUSG00000029592	5	114100333	114123506	13	1
ENSMUSG00000029599	5	120613130	120628590	20	2
ENSMUSG00000029602	5	120648812	120679597	30	2
ENSMUSG00000029603	5	120680202	120711927	19	1
ENSMUSG00000029608	5	120940502	121009518	22	5
ENSMUSG00000029613	5	143817788	143904256	19	3
ENSMUSG00000029617	5	143987916	144014853	15	3
ENSMUSG00000029625	5	145167213	145182041	23	1
ENSMUSG00000029640	5	146734809	146795006	14	1
ENSMUSG00000029648	5	147561604	147726011	37	2
ENSMUSG00000029657	5	149614287	149636376	30	5
ENSMUSG00000029661	6	4504814	4541543	73	3
ENSMUSG00000029673	5	131437333	132543344	53	1
ENSMUSG00000029674	5	134656039	134688590	31	2
ENSMUSG00000029684	6	24613805	24665009	15	1
ENSMUSG00000029686	6	47453398	47526139	45	2
ENSMUSG00000029705	5	136248135	136567490	64	1
ENSMUSG00000029712	5	137553517	137569582	26	3
ENSMUSG00000029714	5	137518880	137527934	24	2
ENSMUSG00000029722	5	137650483	137684726	21	1
ENSMUSG00000029726	5	137781906	137786715	10	2
ENSMUSG00000029752	6	7675169	7693254	26	4
ENSMUSG00000029757	6	5725639	6028039	26	1
ENSMUSG00000029763	6	33249085	33973979	34	2
ENSMUSG00000029767	6	29348069	29377110	24	4
ENSMUSG00000029769 ENSMUSG00000092956	6	29396309	29426994	38	2
ENSMUSG00000029772	6	29768011	29912310	64	1
ENSMUSG00000029775	6	30401868	30455179	24	1
ENSMUSG00000029776	6	52546228	52640389	12	2
ENSMUSG00000029778	6	55451978	55501451	30	3
ENSMUSG00000029780	6	56882400	56923932	25	1
ENSMUSG00000029804	6	58831465	58920398	41	8
ENSMUSG00000029817	6	49243921	49264052	8	1
ENSMUSG00000029819	6	49822710	49829507	4	3
ENSMUSG00000029823	6	38551334	38609470	39	3
ENSMUSG00000029833	6	37870811	37966296	31	2
ENSMUSG00000029836	6	51470360	51483704	18	1
ENSMUSG00000029838	6	36715663	36811361	5	1
ENSMUSG00000029869	6	41605482	41620509	27	7
ENSMUSG00000029910	6	66535390	66541033	15	1
ENSMUSG00000029916	6	40325478	40396762	16	3
ENSMUSG00000029922	6	39397804	39420462	23	4
ENSMUSG00000029992	6	87042846	87092197	28	1
ENSMUSG00000029993	6	87009236	87028461	19	2
ENSMUSG00000029998	6	86386006	86397150	12	2
ENSMUSG00000030000	6	86078084	86119555	16	2
ENSMUSG00000030002	6	85942268	85961667	19	3
ENSMUSG00000030007	6	85451505	85468477	12	6
ENSMUSG00000030016	6	83914353	83986869	34	3
ENSMUSG00000030037 ENSMUSG00000079511	6	83101617	83109939	18	1
ENSMUSG00000030045	6	81957851	81965958	9	2
ENSMUSG00000030058	6	87887814	87913595	47	8
ENSMUSG00000030059	6	97155266	97179124	19	1
ENSMUSG00000030067 ENSMUSG00000093661 ENSMUSG00000030068	6	98925338	99666797	83	4
ENSMUSG00000030077	6	103510876	103733035	27	9
ENSMUSG00000030082	6	88503601	88518905	33	2
ENSMUSG00000030083	6	88835915	88841935	12	3
ENSMUSG00000030086	6	89383146	89595652	8	1
ENSMUSG00000030088	6	90486427	90600203	32	1
ENSMUSG00000030102	6	108213118	108551109	62	9
ENSMUSG00000030103	6	108660629	108666925	9	1
ENSMUSG00000030105	6	108783059	108823723	7	1
ENSMUSG00000030108	6	121300227	121337733	20	1
ENSMUSG00000030120	6	124931388	124936138	10	1
ENSMUSG00000030122	6	124913681	124917946	9	5
ENSMUSG00000030123	6	115954811	115995005	41	5
ENSMUSG00000030126	6	116018618	116193486	25	3
ENSMUSG00000030134	6	118066385	118091546	13	2
ENSMUSG00000030138	6	118383383	118419417	23	1
ENSMUSG00000030172	6	119570796	119848167	48	1
ENSMUSG00000030201	6	134446476	134566965	27	1
ENSMUSG00000030204	6	135011612	135023776	31	1
ENSMUSG00000030209	6	135713232	136173511	22	2
ENSMUSG00000030216	6	136813654	136828233	24	3
ENSMUSG00000030224	6	137735078	137751932	14	1
ENSMUSG00000030226	6	138362918	138581968	22	3
ENSMUSG00000030231	6	140424099	140594906	31	1
ENSMUSG00000030246	6	142490249	142507957	13	3
ENSMUSG00000030257	6	112717971	112947266	31	2
ENSMUSG00000030265	6	145216699	145250239	17	1
ENSMUSG00000030268	6	144993835	145076184	26	1
ENSMUSG00000030272	6	113334124	113343984	28	3
ENSMUSG00000030276 ENSMUSG00000079426	6	113378113	113414583	49	2
ENSMUSG00000030279	6	143010920	143100107	27	7
ENSMUSG00000030284	6	113483297	113493338	19	5
ENSMUSG00000030291	6	146642547	146650602	9	1
ENSMUSG00000030302	6	113745669	114042613	40	10
ENSMUSG00000030304	6	148179079	148212374	43	2
ENSMUSG00000030313	6	148988071	149101680	30	5
ENSMUSG00000030327	6	122874557	122888934	8	2
ENSMUSG00000030335	6	125191801	125195583	8	2
ENSMUSG00000030350	6	127689011	127769472	10	2
ENSMUSG00000030352	6	127961396	128143594	25	1
ENSMUSG00000030374	7	16815889	16840931	50	15
ENSMUSG00000030376	7	16130300	16160509	10	2
ENSMUSG00000030386	7	12478293	12496235	15	1
ENSMUSG00000030397	7	19426075	19458494	17	5
ENSMUSG00000030428	7	4119408	4136706	45	3
ENSMUSG00000030435	7	5062143	5079945	18	2
ENSMUSG00000030451	7	56050155	56231794	95	14
ENSMUSG00000030465	8	67689082	68062286	34	2
ENSMUSG00000030509	7	66644565	66689596	11	1
ENSMUSG00000030519	7	64501706	64753870	22	2
ENSMUSG00000030533	7	80325292	80341005	39	1
ENSMUSG00000030534	7	80269649	80291579	37	1
ENSMUSG00000030551	7	70351946	70366735	5	1
ENSMUSG00000030605	7	79133769	79149060	10	1
ENSMUSG00000030612	7	78775236	78783531	6	1
ENSMUSG00000030613	7	92561149	92582294	10	1
ENSMUSG00000030619	7	89954656	89980983	14	3
ENSMUSG00000030621	7	89632392	89854359	30	2
ENSMUSG00000030649	7	101881325	101901845	36	1
ENSMUSG00000030653	7	101421691	101512829	36	3
ENSMUSG00000030654	7	118118891	118129625	6	1
ENSMUSG00000030655	7	118131308	118243637	73	5
ENSMUSG00000030657	7	117380979	117667751	14	1
ENSMUSG00000030662	14	120911194	120948042	26	3
ENSMUSG00000030685 ENSMUSG00000030683 ENSMUSG00000095334	7	126928879	126970606	49	7
ENSMUSG00000030691	7	101108775	101284405	34	1
ENSMUSG00000030695	7	126795234	126800751	31	4
ENSMUSG00000030701	7	100642892	100662414	27	5
ENSMUSG00000030704	7	100607410	100641268	13	2
ENSMUSG00000030706	7	100545751	100608297	27	1
ENSMUSG00000030707	7	126699773	126707787	33	2
ENSMUSG00000030718	7	100326737	100371896	14	6
ENSMUSG00000030726	7	100082111	100121565	26	1
ENSMUSG00000030729	7	100227394	100278868	19	3
ENSMUSG00000030731	7	44384102	44400187	21	1
ENSMUSG00000030738	7	126546455	126566411	21	4
ENSMUSG00000030739	7	44605803	44670843	57	1
ENSMUSG00000030753	7	98703103	98718062	12	1
ENSMUSG00000030763	7	123377982	123430358	11	2
ENSMUSG00000030774	7	97842935	97912381	15	3
ENSMUSG00000030779	7	122965686	123002557	31	5
ENSMUSG00000030788	7	110800432	110844457	33	2
ENSMUSG00000030795	7	127967457	127982368	45	9
ENSMUSG00000030811	7	127745201	127769476	22	3
ENSMUSG00000030816	7	127588698	127603605	20	1
ENSMUSG00000030824	7	45492874	45510406	31	3
ENSMUSG00000030835	7	46033698	46084212	39	3
ENSMUSG00000030842	7	101905904	101926675	7	1
ENSMUSG00000030850	7	130391526	130519961	16	1
ENSMUSG00000030854	7	47077798	47133684	39	1
ENSMUSG00000030881	7	105634203	105640416	38	4
ENSMUSG00000030884	7	120635176	120659478	24	11
ENSMUSG00000030890	7	105736592	105742925	38	3
ENSMUSG00000030905	7	120186380	120202111	10	3
ENSMUSG00000030946	7	132610638	132706420	16	1
ENSMUSG00000030967	7	132931142	132986391	14	2
ENSMUSG00000030970 ENSMUSG00000030849	7	130162451	133124354	102	3
ENSMUSG00000030980	7	118842222	118856254	17	2
ENSMUSG00000030987	7	102267824	102436848	12	1
ENSMUSG00000031007	X	12587801	12617049	10	1
ENSMUSG00000031010	X	13071498	13173328	59	4
ENSMUSG00000031012	X	13517080	13851367	48	5
ENSMUSG00000031021	7	109735834	109752875	10	1
ENSMUSG00000031059	X	20615326	20617619	3	2
ENSMUSG00000031060	X	20617503	20650901	33	1
ENSMUSG00000031066	X	20703906	20720539	30	8
ENSMUSG00000031068	7	137437648	137468594	11	6
ENSMUSG00000031072	7	144915100	144930748	16	1
ENSMUSG00000031078	7	144435733	144471009	31	2
ENSMUSG00000031095	X	38533274	38576196	30	2
ENSMUSG00000031099	X	47809368	47892974	40	1
ENSMUSG00000031119	X	52053021	52165252	9	1
ENSMUSG00000031129	9	94669909	95230445	21	1
ENSMUSG00000031134	X	57383530	57393036	22	1
ENSMUSG00000031148	X	7697131	7710262	16	2
ENSMUSG00000031149	X	7728439	7731064	3	2
ENSMUSG00000031154	X	7841364	7876626	34	2
ENSMUSG00000031157	X	7894519	7899269	19	10
ENSMUSG00000031166	X	8123301	8132892	31	12
ENSMUSG00000031167	X	8138975	8145880	31	1
ENSMUSG00000031176	X	9654267	9663003	10	1
ENSMUSG00000031198	X	75382399	75396459	8	1
ENSMUSG00000031221	X	100494291	100516125	8	3
ENSMUSG00000031226	X	105079756	105117090	14	1
ENSMUSG00000031229	X	105797615	105929397	76	8
ENSMUSG00000031242	X	107782751	107816334	10	3
ENSMUSG00000031284	X	143518591	143797796	37	6
ENSMUSG00000031290	X	147470375	147554081	31	4
ENSMUSG00000031292	X	160784308	160994702	21	3
ENSMUSG00000031295	X	160502166	160598878	51	1
ENSMUSG00000031299	X	160122209	160138413	16	3
ENSMUSG00000031309	X	159210307	159368244	42	5
ENSMUSG00000031310	X	101404384	101420849	68	1
ENSMUSG00000031311	X	101429318	101448591	27	11
ENSMUSG00000031314	X	101532734	101601789	55	1
ENSMUSG00000031347	X	72913532	72918411	10	1
ENSMUSG00000031353	X	162760402	162779092	22	5
ENSMUSG00000031360	X	162901238	163032508	42	2
ENSMUSG00000031365	X	73342621	73359080	8	1
ENSMUSG00000031370	X	163935443	163958661	28	4
ENSMUSG00000031376	X	73503086	73571005	23	1
ENSMUSG00000031389 ENSMUSG00000031388 ENSMUSG00000031391	X	73853778	73921944	150	4
ENSMUSG00000031403	X	75095854	75109777	41	1
ENSMUSG00000031425	X	136822671	136839733	14	1
ENSMUSG00000031431	X	140539528	140600659	15	2
ENSMUSG00000031441	8	12757014	12868728	51	4
ENSMUSG00000031442	8	12873806	13020905	81	6
ENSMUSG00000031453	8	13566950	13677603	34	8
ENSMUSG00000031458	8	13884788	13890271	4	1
ENSMUSG00000031467	8	18846277	18891361	11	1
ENSMUSG00000031502	8	11198423	11312826	54	2
ENSMUSG00000031505	8	11497506	11514960	22	3
ENSMUSG00000031511	8	11728105	11835219	31	2
ENSMUSG00000031527	8	35465265	35495533	7	2
ENSMUSG00000031530	8	34807297	34819894	4	1
ENSMUSG00000031536	8	22628119	22653437	14	1
ENSMUSG00000031537	8	22659212	22706589	52	4
ENSMUSG00000031539	8	22787354	22805654	9	2
ENSMUSG00000031540	8	22859535	22943259	21	2
ENSMUSG00000031543	8	22974844	23150497	82	1
ENSMUSG00000031545	8	23172946	23208453	13	2
ENSMUSG00000031555	8	24949611	25016922	26	1
ENSMUSG00000031561	8	48227682	48844026	39	3
ENSMUSG00000031565	8	25513654	25575714	52	4
ENSMUSG00000031575	8	25816191	25847694	36	3
ENSMUSG00000031578	8	31159468	31168724	10	4
ENSMUSG00000031591	8	41340197	41374773	24	3
ENSMUSG00000031592	8	41239759	41334086	38	1
ENSMUSG00000031601	8	40492540	40515847	29	5
ENSMUSG00000031604	8	64718139	64733792	20	1
ENSMUSG00000031608	8	57523828	57653032	20	1
ENSMUSG00000031617	8	77595982	77610698	17	1
ENSMUSG00000031618	8	76899442	77245012	24	1
ENSMUSG00000031622	8	72723288	72758203	20	7
ENSMUSG00000031652	8	86841139	86885258	7	1
ENSMUSG00000031660	8	88331039	88362194	32	2
ENSMUSG00000031666	8	91070057	91123844	35	3
ENSMUSG00000031668	6	70844515	70905245	23	1
ENSMUSG00000031673	8	102632995	102785111	13	2
ENSMUSG00000031683	8	78804865	78821140	10	2
ENSMUSG00000031696	8	85260397	85299513	17	2
ENSMUSG00000031697	8	85299632	85308278	7	2
ENSMUSG00000031701	8	85537640	85555271	9	1
ENSMUSG00000031708	8	83571700	83594491	15	6
ENSMUSG00000031709	8	83165352	83272934	25	1
ENSMUSG00000031723	8	109565892	109574051	8	1
ENSMUSG00000031748	8	93809966	93969388	30	9
ENSMUSG00000031751	8	93971588	94012663	20	1
ENSMUSG00000031753	8	110846600	110882227	46	5
ENSMUSG00000031754	8	94017770	94037021	7	1
ENSMUSG00000031781	8	94819818	94838358	24	1
ENSMUSG00000031782	8	94838321	94854895	22	2
ENSMUSG00000031788	8	95099832	95142540	25	1
ENSMUSG00000031808	8	71568927	71586708	14	1
ENSMUSG00000031812	8	121590361	121598760	15	1
ENSMUSG00000031818	8	120668222	120674207	18	1
ENSMUSG00000031824	8	120114152	120165306	24	2
[truncated: 1,643 more rows]

## Sheet: exGF SI
geneID	chr	start	end	total_exons	exon_changes
ENSMUSG00000000001	3	108107280	108146146	9	3
ENSMUSG00000000078	13	5861489	5870393	4	2
ENSMUSG00000000085	4	120405281	120530186	45	3
ENSMUSG00000000126	11	59306928	59333552	7	1
ENSMUSG00000000127	17	63896018	64139494	22	2
ENSMUSG00000000131	7	126101715	126200501	67	5
ENSMUSG00000000134	X	7762560	7775202	39	3
ENSMUSG00000000142	11	108920349	108950783	22	1
ENSMUSG00000000168	9	50634633	50659780	24	3
ENSMUSG00000000184	6	127125779	127151048	5	2
ENSMUSG00000000194	2	31152316	31218775	39	1
ENSMUSG00000000197	14	123276641	123627144	44	4
ENSMUSG00000000223	X	134404551	134456573	37	4
ENSMUSG00000000296	10	31332380	31445921	7	2
ENSMUSG00000000308	2	121357714	121363737	30	6
ENSMUSG00000000346	15	100615628	100620731	4	3
ENSMUSG00000000374	10	78186725	78244642	23	1
ENSMUSG00000000399	6	126821863	126849144	11	3
ENSMUSG00000000416	6	18366478	18514869	42	4
ENSMUSG00000000420	18	24205344	24286818	28	4
ENSMUSG00000000439	6	115601938	115618670	8	3
ENSMUSG00000000532	15	101174067	101213679	9	1
ENSMUSG00000000552	15	103313895	103340086	8	1
ENSMUSG00000000560	5	70961057	71095849	10	1
ENSMUSG00000000563	3	105942698	105960099	18	7
ENSMUSG00000000568	5	99958426	99978938	37	2
ENSMUSG00000000581	11	17257579	17269176	14	2
ENSMUSG00000000600	5	3803165	3844515	18	1
ENSMUSG00000000605	7	7282316	7299511	13	1
ENSMUSG00000000631	11	77763246	77865980	90	1
ENSMUSG00000000632	11	77930800	77979048	36	4
ENSMUSG00000000711	10	128677193	128696268	6	2
ENSMUSG00000000743	8	123204264	123212763	12	3
ENSMUSG00000000751	11	75298166	75348324	27	4
ENSMUSG00000000759	8	12614277	12672248	40	1
ENSMUSG00000000787	X	13280970	13294052	29	8
ENSMUSG00000000794	3	89520164	89672072	10	1
ENSMUSG00000000804	11	84984442	85140161	50	5
ENSMUSG00000000838 ENSMUSG00000098736	X	68678485	68717963	37	6
ENSMUSG00000000861	11	24078056	24174123	16	5
ENSMUSG00000000881	X	100767722	100818410	34	7
ENSMUSG00000000916	5	135369953	135376805	25	1
ENSMUSG00000001016	3	90476201	90488379	14	2
ENSMUSG00000001017	3	90498956	90509498	24	1
ENSMUSG00000001036	11	61517249	61579687	33	7
ENSMUSG00000001053	11	51643063	51650842	11	1
ENSMUSG00000001062	8	123242356	123254348	41	4
ENSMUSG00000001065	8	123254195	123269745	27	1
ENSMUSG00000001098	5	114363567	114380515	20	4
ENSMUSG00000001100	11	78512193	78522736	22	1
ENSMUSG00000001105	11	78536361	78541737	16	5
ENSMUSG00000001119	10	76708792	76726168	38	2
ENSMUSG00000001120	10	76761857	76961887	36	7
ENSMUSG00000001127	X	20797814	20860519	41	2
ENSMUSG00000001134 ENSMUSG00000009406	X	20933395	20962017	25	1
ENSMUSG00000001150	10	76468971	76515856	29	1
ENSMUSG00000001151	10	76351254	76442912	42	2
ENSMUSG00000001157	6	86691768	86733378	19	1
ENSMUSG00000001158	6	86675221	86684522	12	7
ENSMUSG00000001173	X	47912387	47965868	37	1
ENSMUSG00000001175	12	100199435	100209806	11	9
ENSMUSG00000001211	10	78269178	78352489	30	1
ENSMUSG00000001227	17	56123085	56140343	18	1
ENSMUSG00000001248	7	31130127	31155896	36	4
ENSMUSG00000001270	12	111669355	111672338	8	3
ENSMUSG00000001280	15	102406143	102436404	19	1
ENSMUSG00000001289 ENSMUSG00000001285	15	102326116	102338139	47	2
ENSMUSG00000001305	1	186720978	186749358	8	1
ENSMUSG00000001323	11	74906359	74925948	28	11
ENSMUSG00000001366	9	78081499	78109065	25	2
ENSMUSG00000001376	6	3498382	3603319	49	10
ENSMUSG00000001415	3	88336260	88362338	41	1
ENSMUSG00000001416	3	88297116	88321767	36	8
ENSMUSG00000001419	3	88142372	88172086	25	2
ENSMUSG00000001424	6	28475139	28935162	44	2
ENSMUSG00000001440	11	97159714	97187881	27	4
ENSMUSG00000001441	11	97205842	97280638	62	6
ENSMUSG00000001445	11	97041560	97049213	9	1
ENSMUSG00000001467	5	4081145	4104746	17	2
ENSMUSG00000001472	8	123373824	123404173	20	4
ENSMUSG00000001482	8	123442986	123463270	25	2
ENSMUSG00000001525	17	35833921	35838306	12	2
ENSMUSG00000001542	13	75707484	75772356	12	2
ENSMUSG00000001576	17	26561489	26656931	24	2
ENSMUSG00000001630	6	146724995	146778812	17	1
ENSMUSG00000001632	6	113307181	113324857	30	3
ENSMUSG00000001707	13	38645698	38659028	4	1
ENSMUSG00000001729	12	112653821	112674884	32	3
ENSMUSG00000001767	2	145917479	145935014	18	3
ENSMUSG00000001774	9	18292267	18314000	11	3
ENSMUSG00000001783	10	85938637	85957823	14	4
ENSMUSG00000001802	7	35200027	35215370	13	2
ENSMUSG00000001829	7	101663633	101790168	36	1
ENSMUSG00000001833	9	25252439	25308571	15	10
ENSMUSG00000001847	5	143505478	143528036	12	1
ENSMUSG00000001909	8	84686307	84699808	79	3
ENSMUSG00000001911	8	84699876	84800344	29	7
ENSMUSG00000001924	X	20658326	20683179	35	2
ENSMUSG00000001983	11	106066061	106073612	5	1
ENSMUSG00000002014	X	73787028	73790830	23	2
ENSMUSG00000002015	X	73686178	73716175	8	1
ENSMUSG00000002028	9	44803355	44881296	45	2
ENSMUSG00000002032	9	44793776	44799307	12	1
ENSMUSG00000002102	2	91054009	91066369	34	4
ENSMUSG00000002105	2	91061791	91070417	33	1
ENSMUSG00000002107	2	6539694	7509563	70	9
ENSMUSG00000002129	11	4160350	4182541	22	3
ENSMUSG00000002147	10	127642986	127660957	31	1
ENSMUSG00000002222	6	71388634	71440637	18	2
ENSMUSG00000002265	7	6703892	6730421	16	1
ENSMUSG00000002307	17	33909414	33915589	28	1
ENSMUSG00000002319 ENSMUSG00000002320	14	55625400	55643806	98	2
ENSMUSG00000002326	14	55672235	55678750	10	2
ENSMUSG00000002329	14	55657879	55660508	6	4
ENSMUSG00000002341	8	70093085	70120873	15	6
ENSMUSG00000002365	17	5841328	5931033	18	1
ENSMUSG00000002372	17	56673225	56711769	16	16
ENSMUSG00000002379	17	56717762	56724248	4	1
ENSMUSG00000002396	8	71371298	71379361	11	2
ENSMUSG00000002413	6	39603237	39725463	33	4
ENSMUSG00000002416 ENSMUSG00000046947	6	39573873	39603382	42	1
ENSMUSG00000002428	3	20057811	20118490	36	1
ENSMUSG00000002455	2	181591868	181655660	29	5
ENSMUSG00000002475	18	10644411	10706771	15	4
ENSMUSG00000002477	18	10617796	10628230	4	3
ENSMUSG00000002489	16	89787111	89980080	51	2
ENSMUSG00000002496	17	24595937	24632629	40	1
ENSMUSG00000002524	15	76070184	76080946	12	3
ENSMUSG00000002546	2	32287384	32307921	49	1
ENSMUSG00000002578	10	128630843	128645991	27	1
ENSMUSG00000002602	7	25757273	25788705	33	1
ENSMUSG00000002625	17	32321425	32350581	14	4
ENSMUSG00000002658	17	57003405	57011288	13	6
ENSMUSG00000002661	17	56997339	56999322	9	2
ENSMUSG00000002728	2	145902099	145916425	23	4
ENSMUSG00000002767	17	46646229	46650139	17	2
ENSMUSG00000002797	6	54982580	54992950	10	1
ENSMUSG00000002808	13	19591709	19619830	3	1
ENSMUSG00000002833	17	56079657	56100596	16	2
ENSMUSG00000002844	16	38445399	38452689	4	3
ENSMUSG00000002881	1	52457294	52500679	18	2
ENSMUSG00000002900	12	31265234	31329644	52	4
ENSMUSG00000002948 ENSMUSG00000089736	8	4238740	4251423	37	3
ENSMUSG00000002949	8	4259731	4275913	32	9
ENSMUSG00000002957	7	141562180	141633011	22	4
ENSMUSG00000002985	7	19696109	19699166	25	8
ENSMUSG00000003033	8	72240018	72257385	23	3
ENSMUSG00000003037	8	72161200	72183904	13	8
ENSMUSG00000003038	4	133964738	133968650	37	4
ENSMUSG00000003039	8	72219730	72223764	4	2
ENSMUSG00000003099	7	17004640	17027924	34	4
ENSMUSG00000003131	9	45965311	45984871	6	1
ENSMUSG00000003135	1	39534992	39546889	16	1
ENSMUSG00000003153	6	122727809	122801640	26	1
ENSMUSG00000003154	6	122819914	122845366	15	1
ENSMUSG00000003161	5	8046078	8069379	19	3
ENSMUSG00000003226	10	58446852	58494155	29	8
ENSMUSG00000003228	19	60889749	61092553	16	1
ENSMUSG00000003233	16	20516982	20532520	26	2
ENSMUSG00000003234	16	20548577	20561379	30	6
ENSMUSG00000003235	16	20498817	20509955	19	4
ENSMUSG00000003269	7	45806637	45814581	30	5
ENSMUSG00000003273	7	45699843	45704682	13	9
ENSMUSG00000003279	17	69969073	70821413	46	7
ENSMUSG00000003308	9	21229730	21239332	17	2
ENSMUSG00000003316	8	111154421	111259216	34	4
ENSMUSG00000003352	15	98632220	98644530	14	3
ENSMUSG00000003360	15	98645134	98662889	30	3
ENSMUSG00000003363	7	27532000	27553218	30	4
ENSMUSG00000003378	7	25009853	25072369	20	2
ENSMUSG00000003380	7	24969750	24972728	5	4
ENSMUSG00000003402	9	22003035	22014219	19	2
ENSMUSG00000003435	7	28314898	28338719	30	2
ENSMUSG00000003452	6	149408984	149563329	24	1
ENSMUSG00000003464	1	172126755	172136493	19	5
ENSMUSG00000003518	11	101971143	101987013	14	5
ENSMUSG00000003545	7	19302721	19310045	4	1
ENSMUSG00000003546	17	46630631	46645144	16	1
ENSMUSG00000003660	2	127208386	127240451	56	2
ENSMUSG00000003662	2	127240938	127247816	13	1
ENSMUSG00000003721	1	121304353	121332589	36	12
ENSMUSG00000003731	4	129643980	129672767	23	1
ENSMUSG00000003778	18	34598615	34624601	35	7
ENSMUSG00000003808	8	84856989	84869257	25	1
ENSMUSG00000003810	4	116306762	116464183	61	1
ENSMUSG00000003814	8	84841850	84846934	17	8
ENSMUSG00000003847	8	107293470	107379517	37	2
ENSMUSG00000003863	7	45339126	45367019	46	3
ENSMUSG00000003929	17	33329342	33358878	4	2
ENSMUSG00000003949	11	90336536	90390895	15	6
ENSMUSG00000003955	16	36043844	36071515	5	1
ENSMUSG00000003974	5	9485236	9725352	6	2
ENSMUSG00000004031	1	158245269	158356326	16	3
ENSMUSG00000004032	3	107895821	107898686	19	4
ENSMUSG00000004040	11	100885098	100939540	55	2
ENSMUSG00000004056	7	27591552	27640826	45	1
ENSMUSG00000004069 ENSMUSG00000039646	16	4639941	4707695	23	3
ENSMUSG00000004070	16	4726361	4766742	18	1
ENSMUSG00000004071	16	4750348	4790292	17	5
ENSMUSG00000004096	9	14500617	14510577	7	2
ENSMUSG00000004099	9	20907206	20959888	42	12
ENSMUSG00000004110	1	154390731	154884501	62	12
ENSMUSG00000004113	2	24603887	24763152	70	5
ENSMUSG00000004187	15	76660641	76668196	18	2
ENSMUSG00000004207	10	60277627	60302597	21	1
ENSMUSG00000004267	6	124760053	124769673	44	11
ENSMUSG00000004270	6	124663027	124704418	31	3
ENSMUSG00000004319	8	60910389	60983300	31	5
ENSMUSG00000004356	10	88746607	88826814	62	1
ENSMUSG00000004360	10	29211643	29230779	6	4
ENSMUSG00000004364	1	80264923	80340480	28	3
ENSMUSG00000004393	11	6258919	6267772	20	1
ENSMUSG00000004455	5	122158278	122175273	22	1
ENSMUSG00000004460	16	22857845	22879634	20	1
ENSMUSG00000004508	7	97081751	97308940	10	3
ENSMUSG00000004530	5	113842436	113908758	30	4
ENSMUSG00000004535	6	52713729	52766780	32	8
ENSMUSG00000004558	14	51905271	51913488	16	2
ENSMUSG00000004568	8	3393006	3456601	33	1
ENSMUSG00000004642	5	33634952	33652574	27	9
ENSMUSG00000004698	12	34371503	34528889	12	6
ENSMUSG00000004771	9	64715299	64737758	24	5
ENSMUSG00000004789	12	85110833	85134091	15	1
ENSMUSG00000004798	11	61775649	61855073	32	2
ENSMUSG00000004865	17	28587648	28622521	30	4
ENSMUSG00000004892	3	87987531	88000230	23	1
ENSMUSG00000004896	3	87922601	87930717	37	5
ENSMUSG00000004897	3	87906321	87916132	17	4
ENSMUSG00000004933	10	81252935	81263365	35	1
ENSMUSG00000004937	10	81044075	81060178	12	3
ENSMUSG00000004961	7	4539768	4546567	8	1
ENSMUSG00000005034	3	146729579	146812960	17	5
ENSMUSG00000005045	4	152338651	152390194	49	2
ENSMUSG00000005089	2	102658659	102790784	34	4
ENSMUSG00000005103	5	38526814	38561666	15	2
ENSMUSG00000005125	15	66929321	66969640	45	3
ENSMUSG00000005142	8	85083269	85098739	24	1
ENSMUSG00000005198	11	69733997	69758637	37	4
ENSMUSG00000005262	16	18811779	18835261	34	12
ENSMUSG00000005299	5	33739673	33782817	21	5
ENSMUSG00000005371	17	87990859	88065291	29	3
ENSMUSG00000005374	5	135149657	135163873	13	1
ENSMUSG00000005417	11	59661305	59780860	38	3
ENSMUSG00000005442	7	25267704	25294159	51	2
ENSMUSG00000005506	2	90940382	91019497	33	2
ENSMUSG00000005510	2	90894634	90904827	18	7
ENSMUSG00000005514	5	135670033	135735326	31	4
ENSMUSG00000005533	7	67952859	68226780	21	1
ENSMUSG00000005534	8	3150922	3279617	23	1
ENSMUSG00000005583	13	83504034	83667079	17	5
ENSMUSG00000005609	7	111028951	111056377	41	3
ENSMUSG00000005610 ENSMUSG00000088948	7	111070568	111083030	54	10
ENSMUSG00000005615	16	32430921	32475070	23	1
ENSMUSG00000005621	7	80993681	81045164	18	1
ENSMUSG00000005625	3	95032694	95042614	30	1
ENSMUSG00000005656	12	54746349	54795703	14	6
ENSMUSG00000005674	1	171216011	171222514	26	4
ENSMUSG00000005683	10	128337832	128362479	11	2
ENSMUSG00000005687	3	103171655	103179166	21	9
ENSMUSG00000005699	8	105701154	105703493	5	1
ENSMUSG00000005774	3	94954075	94961561	45	1
ENSMUSG00000005779	3	94884093	94886961	12	3
ENSMUSG00000005802	2	122681233	122702663	9	3
ENSMUSG00000005813	3	138458960	138489382	11	1
ENSMUSG00000005846	16	11192970	11203331	13	5
ENSMUSG00000005871	18	34220924	34322189	32	2
ENSMUSG00000005873	18	34344889	34373415	5	4
ENSMUSG00000005881	2	156008045	156018279	34	2
ENSMUSG00000005886	1	13139105	13374083	40	2
ENSMUSG00000005893	6	92091390	92173057	25	2
ENSMUSG00000005899	16	17619354	17644828	59	1
ENSMUSG00000005973	2	105386291	105399319	8	1
ENSMUSG00000005981	16	4039971	4077827	26	1
ENSMUSG00000006005	1	150392838	150449935	81	19
ENSMUSG00000006021	7	16119895	16127516	29	2
ENSMUSG00000006024	7	16098458	16117975	23	5
ENSMUSG00000006050	18	36666681	36679366	30	4
ENSMUSG00000006057	11	96068852	96075670	12	2
ENSMUSG00000006058	11	96034885	96047430	17	1
ENSMUSG00000006095	7	30224131	30232272	11	1
ENSMUSG00000006134	16	17451987	17486255	3	2
ENSMUSG00000006169	11	45852051	45910625	16	2
ENSMUSG00000006191	13	29191746	29855674	39	2
ENSMUSG00000006273	8	69088646	69113711	26	11
ENSMUSG00000006276	8	72341001	72421474	24	1
ENSMUSG00000006288	14	50765415	50785518	10	2
ENSMUSG00000006299	1	74279840	74284738	27	1
ENSMUSG00000006301	1	74288247	74305622	32	2
ENSMUSG00000006307	7	30568858	30588726	54	1
ENSMUSG00000006333	7	3703993	3706901	28	2
ENSMUSG00000006335	7	3620324	3629929	14	1
ENSMUSG00000006362	8	122628739	122699109	24	2
ENSMUSG00000006373	X	36598206	36606079	3	2
ENSMUSG00000006386	4	94739289	94874976	31	1
ENSMUSG00000006392	4	118409337	118415782	29	5
ENSMUSG00000006418	2	167492645	167516173	12	2
ENSMUSG00000006423	X	36823737	36874111	21	9
ENSMUSG00000006456 ENSMUSG00000096370 ENSMUSG00000094936	19	4742913	4811634	38	3
ENSMUSG00000006476	2	25054355	25062881	48	4
ENSMUSG00000006494	2	71873224	71903858	29	2
ENSMUSG00000006498	10	79854427	79864771	49	1
ENSMUSG00000006576	1	75546266	75562172	48	1
ENSMUSG00000006599	7	46796103	46823800	24	1
ENSMUSG00000006651	7	30434981	30445582	17	1
ENSMUSG00000006673 ENSMUSG00000032604 ENSMUSG00000103970	9	108507713	108560163	107	9
ENSMUSG00000006676	9	108490602	108502337	65	4
ENSMUSG00000006678	X	93304767	93632155	49	2
ENSMUSG00000006711	13	24845135	24901270	26	6
ENSMUSG00000006740	18	6201002	6242174	42	14
ENSMUSG00000006800	2	166073089	166155663	35	3
ENSMUSG00000006818	17	13007839	13018119	5	1
ENSMUSG00000006930	11	100347327	100356128	22	4
ENSMUSG00000006932	9	120929216	120960507	50	8
ENSMUSG00000006941	9	120492606	120495327	4	1
ENSMUSG00000006998	16	20651652	20663414	34	7
ENSMUSG00000007036	17	35089263	35102987	34	2
ENSMUSG00000007038	17	34931253	34935953	11	2
ENSMUSG00000007207	5	135023482	135051100	19	3
ENSMUSG00000007411	12	111574510	111656227	17	5
ENSMUSG00000007415	5	3632932	3647934	10	4
ENSMUSG00000007458	6	122308720	122317680	11	2
ENSMUSG00000007564	17	20945311	20965916	31	5
ENSMUSG00000007617	13	93303757	93404129	27	8
ENSMUSG00000007653	11	42419757	42629028	19	2
ENSMUSG00000007659	2	152780668	152831728	21	1
ENSMUSG00000007670	17	57021058	57031507	18	3
ENSMUSG00000007721	8	70868227	70873490	5	4
ENSMUSG00000007739	11	22990519	23003780	33	11
ENSMUSG00000007783	7	44959373	44974851	19	1
ENSMUSG00000007812	5	145231723	145247302	8	1
ENSMUSG00000007827	6	118501308	118562226	38	2
ENSMUSG00000007850	11	50376990	50386528	48	13
ENSMUSG00000007880	4	133679008	133756769	31	5
ENSMUSG00000007891 ENSMUSG00000045777	7	142325837	142388038	30	5
ENSMUSG00000007950	8	71456700	71463657	5	2
ENSMUSG00000008035	X	10715013	10719690	9	3
ENSMUSG00000008090	5	108694229	108706950	7	1
ENSMUSG00000008153	6	124430759	124464794	30	2
ENSMUSG00000008200	2	90745370	90781021	36	2
ENSMUSG00000008206	8	4493026	4531680	31	1
ENSMUSG00000008301	18	56562443	56587712	9	1
ENSMUSG00000008305	4	72117142	72200919	42	1
ENSMUSG00000008333	2	143063039	143072853	12	1
ENSMUSG00000008373	7	3629985	3642486	25	1
ENSMUSG00000008393	16	8658587	8672153	4	2
ENSMUSG00000008450	8	105860634	105880402	5	2
ENSMUSG00000008475	1	152766542	152775597	6	3
ENSMUSG00000008489	4	91250763	91400785	36	5
ENSMUSG00000008540	6	138140316	138156755	19	1
ENSMUSG00000008575	4	82290173	82705750	29	4
ENSMUSG00000008658	16	6809222	7412479	16	2
ENSMUSG00000008668	17	33951999	33956001	23	3
ENSMUSG00000008683	7	118104378	118116186	18	1
ENSMUSG00000008690	15	89355719	89372826	49	2
ENSMUSG00000008730	3	103739815	103791563	29	6
ENSMUSG00000008763	3	100562208	100685503	24	8
ENSMUSG00000008892	8	22577075	22593813	10	6
ENSMUSG00000008976	16	84834925	84863779	20	1
ENSMUSG00000008999	2	172868012	172940321	9	1
ENSMUSG00000009013	5	115297110	115300999	12	1
ENSMUSG00000009030	2	37350074	37359332	13	1
ENSMUSG00000009073	11	4765845	4849536	37	4
ENSMUSG00000009079	11	5069689	5099266	42	4
ENSMUSG00000009090	11	4986824	5042791	32	3
ENSMUSG00000009112	6	120836230	120892842	7	1
ENSMUSG00000009207	2	74520291	74579435	39	1
ENSMUSG00000009291	10	77581720	77598732	24	4
ENSMUSG00000009394	6	115134902	115282626	14	6
ENSMUSG00000009418 ENSMUSG00000090399	1	135434580	135688105	52	2
ENSMUSG00000009470	13	98839019	98926384	31	5
ENSMUSG00000009535	18	68300355	68324852	27	4
ENSMUSG00000009549	2	118475850	118479711	13	5
ENSMUSG00000009569	16	13256481	13417529	24	3
ENSMUSG00000009575	15	103191544	103239816	13	4
ENSMUSG00000009630	8	33599621	33619794	7	1
ENSMUSG00000009647	10	59446984	59616692	19	1
ENSMUSG00000009681	10	75060896	75184923	23	3
ENSMUSG00000009687 ENSMUSG00000098783	7	31032722	31042481	33	3
ENSMUSG00000009741	9	113930934	113977199	21	1
ENSMUSG00000009894	11	59407134	59451186	23	2
ENSMUSG00000009905	1	106720459	106759727	15	3
ENSMUSG00000009995	X	74281912	74290151	57	1
ENSMUSG00000010025	11	61223417	61267464	22	3
ENSMUSG00000010064	9	107650634	107669530	51	3
ENSMUSG00000010067	9	107551555	107562267	24	1
ENSMUSG00000010086	11	61448442	61454131	29	2
ENSMUSG00000010097	19	8757073	8772475	49	1
ENSMUSG00000010110 ENSMUSG00000098844	19	8741413	8756069	55	2
ENSMUSG00000010277	11	78261752	78290623	56	8
ENSMUSG00000010307	7	47050640	47054776	3	1
ENSMUSG00000010392	11	76726602	76763579	10	1
ENSMUSG00000010453	1	36335730	36369181	40	2
ENSMUSG00000010554	11	74770830	74828525	22	1
ENSMUSG00000010608	12	83631236	83683123	60	11
ENSMUSG00000010663	19	10182888	10196870	12	1
ENSMUSG00000010755	7	143557230	143600090	39	5
ENSMUSG00000010803	11	42130939	42182930	17	2
ENSMUSG00000010911	2	103073675	103092644	15	2
ENSMUSG00000010914	2	103021075	103073513	15	2
ENSMUSG00000011114	9	37649182	37657312	16	3
ENSMUSG00000011158	12	112959862	113000621	18	2
ENSMUSG00000011256	11	46055992	46147343	28	1
ENSMUSG00000011257	4	123262351	123298925	29	6
ENSMUSG00000011752	19	41911871	41918664	4	3
ENSMUSG00000011831	5	107744795	107875107	46	5
ENSMUSG00000011832	8	4166567	4211257	49	2
ENSMUSG00000011877	11	77493562	77507786	32	4
ENSMUSG00000011960	15	98538689	98570923	26	1
ENSMUSG00000012114	16	17651221	17722930	18	1
ENSMUSG00000012405	14	18267823	18271391	13	6
ENSMUSG00000012422	13	90089123	90143907	11	4
ENSMUSG00000012535	6	29540827	29609887	45	2
ENSMUSG00000012609	12	85824659	86061893	77	5
ENSMUSG00000012640	7	43296197	43313294	19	1
ENSMUSG00000013033	8	83900105	83941954	40	7
ENSMUSG00000013076	9	14541966	14615483	20	1
ENSMUSG00000013089	16	22381309	22439719	23	5
ENSMUSG00000013236	17	56412431	56476483	38	6
ENSMUSG00000013523	2	170346991	170427845	27	5
ENSMUSG00000013593	1	171234853	171251388	22	7
ENSMUSG00000013622	5	31048312	31054633	26	1
ENSMUSG00000013646	11	58330724	58347728	20	3
ENSMUSG00000013662	19	32672563	32712298	10	2
ENSMUSG00000013698	1	172196728	172206804	12	6
ENSMUSG00000013787	17	34898469	34914052	59	1
ENSMUSG00000013997	1	171338008	171345646	27	3
ENSMUSG00000014077	2	119547697	119587027	15	4
ENSMUSG00000014177	11	62879455	62916780	14	6
ENSMUSG00000014195	11	100582818	100620168	33	14
ENSMUSG00000014226	1	160202367	160212875	11	6
ENSMUSG00000014232 ENSMUSG00000005982 ENSMUSG00000093575	16	3872375	3941147	58	10
ENSMUSG00000014313	15	35925886	35938246	15	2
ENSMUSG00000014355	2	128610104	128687391	70	7
ENSMUSG00000014426	17	12227621	12318660	27	3
ENSMUSG00000014470	8	122466147	122476064	10	1
ENSMUSG00000014496	14	31700015	31830415	28	4
ENSMUSG00000014504	18	34330847	34336599	17	1
ENSMUSG00000014550	6	92186712	92214925	21	5
ENSMUSG00000014551	6	92169525	92184033	8	1
ENSMUSG00000014592	4	150917322	151861876	52	4
ENSMUSG00000014602	1	93015464	93101951	75	21
ENSMUSG00000014748	6	83768885	83775813	14	1
ENSMUSG00000014873	2	26916367	26920183	21	1
ENSMUSG00000014905	12	44205897	44210068	3	1
ENSMUSG00000014956	5	32458974	32517433	14	5
ENSMUSG00000014959	2	70661576	70712636	20	3
ENSMUSG00000015002	15	65787034	65873816	45	8
ENSMUSG00000015087	2	25583018	25608521	35	10
ENSMUSG00000015090	2	25466709	25470046	16	3
ENSMUSG00000015092	2	25557847	25562082	13	1
ENSMUSG00000015095	2	25500750	25505471	30	1
ENSMUSG00000015120	17	25261916	25274622	35	5
ENSMUSG00000015143	12	80167542	80260371	24	1
ENSMUSG00000015149	7	28766735	28788665	31	2
ENSMUSG00000015165	7	28808541	28822266	40	9
ENSMUSG00000015189	6	4600840	4643381	24	5
ENSMUSG00000015222	1	66175273	66442583	68	13
ENSMUSG00000015305	10	8722219	8886070	20	2
ENSMUSG00000015396	13	43785107	43803130	5	2
ENSMUSG00000015461	17	34647146	34655074	27	3
ENSMUSG00000015501	10	13966075	14151374	23	3
ENSMUSG00000015536	13	114818236	114832275	45	3
ENSMUSG00000015568	8	68880491	68907448	18	1
ENSMUSG00000015597	17	46383731	46420920	20	2
ENSMUSG00000015599	17	46442448	46487675	15	2
ENSMUSG00000015605	17	46546839	46556162	7	1
ENSMUSG00000015668	X	100622883	100626568	17	2
ENSMUSG00000015671	13	14613242	14625671	8	6
ENSMUSG00000015672	13	14610301	14613037	3	2
ENSMUSG00000015697	3	95323525	95357202	31	1
ENSMUSG00000015709	7	84246281	84409959	19	3
ENSMUSG00000015733	6	17636234	17666972	26	4
ENSMUSG00000015749	3	95929246	95947390	28	3
ENSMUSG00000015755	10	7905653	7956230	17	2
ENSMUSG00000015757	10	7792891	7823135	21	8
ENSMUSG00000015766	6	137477245	137654876	50	4
ENSMUSG00000015776	2	26905262	26910677	10	5
ENSMUSG00000015790	2	26913381	26916530	29	2
ENSMUSG00000015804	5	45520221	45529276	12	1
ENSMUSG00000015806	5	45434032	45450235	21	3
ENSMUSG00000015829	1	159523769	159931729	31	1
ENSMUSG00000015837	11	50199366	50210827	24	5
ENSMUSG00000015839	2	75675513	75704641	7	1
ENSMUSG00000015882	5	45697181	45857615	25	1
ENSMUSG00000015944	5	134099711	134144343	10	1
ENSMUSG00000015961	1	177762962	177796511	17	1
ENSMUSG00000015968	14	30039949	30491156	48	2
ENSMUSG00000016018	13	112867780	112927380	27	2
ENSMUSG00000016150	X	42527866	43429126	43	5
ENSMUSG00000016253	2	174415804	174427502	29	2
ENSMUSG00000016256	2	174427493	174439039	6	4
ENSMUSG00000016257	2	174465067	174473081	16	2
ENSMUSG00000016319	X	36795651	36798807	9	1
ENSMUSG00000016346	2	181075579	181135291	48	5
ENSMUSG00000016382	X	75785654	75875182	26	4
ENSMUSG00000016409	X	37126795	37150746	11	1
ENSMUSG00000016427	X	37187588	37191163	3	1
ENSMUSG00000016481	1	195097382	195131586	32	4
ENSMUSG00000016487	6	146888487	147032025	51	4
ENSMUSG00000016503	5	146948657	146955614	16	1
ENSMUSG00000016510	5	146951573	146963800	17	2
ENSMUSG00000016534	X	38401357	38456454	15	3
ENSMUSG00000016541	15	85336381	85463836	12	1
ENSMUSG00000016554	15	77958998	77970824	15	1
ENSMUSG00000016559	11	116021912	116027962	14	6
ENSMUSG00000016619	15	84923428	84942955	8	1
ENSMUSG00000016831	14	52279146	52296391	21	5
ENSMUSG00000016921	2	162931528	162937121	15	1
ENSMUSG00000017009	2	164424247	164443887	7	2
ENSMUSG00000017119 ENSMUSG00000099023	11	101552149	101581951	59	6
ENSMUSG00000017132	11	118132019	118248592	25	4
ENSMUSG00000017144	2	51130438	51149111	10	1
ENSMUSG00000017188	11	101277968	101279114	5	1
ENSMUSG00000017210 ENSMUSG00000088169	11	98704591	98729435	56	1
ENSMUSG00000017221	11	98682554	98695979	23	7
ENSMUSG00000017286 ENSMUSG00000049396 ENSMUSG00000017288	11	76046226	76243725	81	3
ENSMUSG00000017291	11	77529162	77607815	21	2
ENSMUSG00000017314	11	102057015	102088515	25	6
ENSMUSG00000017376	11	78567168	78697373	20	1
ENSMUSG00000017400	11	98036623	98053462	13	1
ENSMUSG00000017412	2	52428320	52676831	24	1
ENSMUSG00000017418	2	15049395	15082456	22	1
ENSMUSG00000017421	11	80383279	80405733	34	2
ENSMUSG00000017428	11	80428615	80473248	47	5
ENSMUSG00000017478	8	122376609	122417360	37	4
ENSMUSG00000017485	14	16365179	16430787	46	3
ENSMUSG00000017631	11	76416734	76622314	46	9
ENSMUSG00000017639	11	79591212	79698023	17	3
ENSMUSG00000017670	2	165288031	165326479	39	1
ENSMUSG00000017677	11	79239372	79254671	22	3
ENSMUSG00000017679	2	163602314	163619013	18	2
ENSMUSG00000017707	2	163623272	163645131	13	2
ENSMUSG00000017715	11	117986292	118024011	15	1
ENSMUSG00000017734 ENSMUSG00000090996 ENSMUSG00000045503	2	164456964	164493319	35	1
ENSMUSG00000017754	2	164839518	164857711	30	6
ENSMUSG00000017781	11	75588097	75628804	24	5
ENSMUSG00000017801	11	101087277	101092207	19	2
ENSMUSG00000017831	17	53479234	53507671	6	1
ENSMUSG00000017843	12	110485739	110583061	14	7
ENSMUSG00000017929	2	167298444	167349183	15	1
ENSMUSG00000017978	6	23262773	23839421	61	6
ENSMUSG00000017999	2	167015193	167034947	34	3
ENSMUSG00000018001	5	143622447	143710250	22	2
ENSMUSG00000018040	15	83113433	83122801	18	6
ENSMUSG00000018042	15	83153494	83172592	13	3
ENSMUSG00000018068	11	86210681	86257575	51	2
ENSMUSG00000018076	5	118560719	118765435	31	1
ENSMUSG00000018102	13	23684199	23692488	2	2
ENSMUSG00000018160	11	98152154	98193293	32	1
ENSMUSG00000018167	11	98358368	98381112	31	2
ENSMUSG00000018189	1	143777272	143807466	27	5
ENSMUSG00000018196	1	143716338	143749676	38	1
ENSMUSG00000018199	1	143750790	143777068	12	2
ENSMUSG00000018209	2	164070322	164155524	18	1
ENSMUSG00000018286	11	70525367	70527858	14	3
ENSMUSG00000018322	2	164053540	164071169	10	1
ENSMUSG00000018326	2	163994960	164018588	8	5
ENSMUSG00000018362	11	106988629	106999541	23	1
ENSMUSG00000018372	11	106789252	106819930	33	1
ENSMUSG00000018395	11	53567379	53601967	35	6
ENSMUSG00000018398	11	53519257	53549565	25	3
ENSMUSG00000018411	11	104231390	104332090	36	9
ENSMUSG00000018412	11	104333229	104468861	25	6
ENSMUSG00000018425	11	86768846	86807746	23	3
ENSMUSG00000018427	11	86936425	86993707	5	1
ENSMUSG00000018433	11	107166663	107189381	28	1
ENSMUSG00000018446	11	70977836	70983026	11	1
ENSMUSG00000018449	11	70970213	70977833	25	1
ENSMUSG00000018470	11	69326258	69333042	17	2
ENSMUSG00000018474	11	69343273	69369406	58	13
ENSMUSG00000018476	11	69398508	69413675	25	4
ENSMUSG00000018481	11	85187262	85235130	13	3
ENSMUSG00000018501	11	62316426	62458541	100	11
ENSMUSG00000018548	11	87127077	87220683	29	7
ENSMUSG00000018574	11	70010183	70015411	36	5
ENSMUSG00000018585	11	55446641	55461239	6	1
ENSMUSG00000018648	11	84048041	84069261	11	2
ENSMUSG00000018666	11	96789127	96808640	15	2
ENSMUSG00000018677	11	102402985	102407946	45	1
ENSMUSG00000018707	12	110601452	110666945	92	9
ENSMUSG00000018736	11	68821434	68871858	20	10
ENSMUSG00000018750	11	69765912	69784023	23	1
ENSMUSG00000018765	11	69632990	69653297	28	7
ENSMUSG00000018770	2	73908447	73911326	14	4
ENSMUSG00000018796	8	46471041	46536051	38	7
ENSMUSG00000018800	11	110269369	110337716	51	2
ENSMUSG00000018846	11	35769484	35791285	7	2
ENSMUSG00000018848	11	35808381	35834506	24	6
ENSMUSG00000018849	11	35838400	35980527	27	4
ENSMUSG00000018858	11	115403752	115412674	28	15
ENSMUSG00000018865	15	84076097	84105754	7	3
ENSMUSG00000018909	7	99535466	99606771	37	3
ENSMUSG00000018965	5	33018816	33027966	6	1
ENSMUSG00000018974	5	113742446	113771649	19	1
ENSMUSG00000019039	9	108569886	108572774	36	1
ENSMUSG00000019054	5	136953275	136966234	17	1
ENSMUSG00000019082	7	141429739	141437892	54	2
ENSMUSG00000019087	X	74297097	74304721	35	8
ENSMUSG00000019124	6	54505890	54566489	14	5
ENSMUSG00000019132	13	24801657	24814013	8	3
ENSMUSG00000019139	8	70594481	70597288	11	1
ENSMUSG00000019146	15	77991748	78120028	4	1
ENSMUSG00000019179	5	135778480	135790398	15	3
ENSMUSG00000019194	7	31116524	31126945	9	1
ENSMUSG00000019210	6	120795245	120822685	9	3
ENSMUSG00000019254	7	4481520	4501680	50	2
ENSMUSG00000019295	5	33653216	33657977	10	2
ENSMUSG00000019302	11	101009452	101063719	40	10
ENSMUSG00000019362	8	84246237	84249761	3	1
ENSMUSG00000019370	7	16915379	16924114	16	7
ENSMUSG00000019373	11	59817795	59839838	25	1
ENSMUSG00000019428	8	70527724	70535328	32	1
ENSMUSG00000019433	8	83652678	83664788	7	2
ENSMUSG00000019437 ENSMUSG00000099101	11	78176711	78181909	26	1
ENSMUSG00000019471	9	21138541	21149906	8	3
ENSMUSG00000019494	5	138161071	138164646	22	1
ENSMUSG00000019505	11	62551171	62553213	4	2
ENSMUSG00000019659	9	110656503	110711590	7	1
ENSMUSG00000019699	1	177020073	177258203	18	9
ENSMUSG00000019763	10	4401915	4432388	31	3
ENSMUSG00000019772	10	5639218	5647614	7	1
ENSMUSG00000019775	10	5825663	5922400	11	3
ENSMUSG00000019777	10	36974544	37001889	22	2
ENSMUSG00000019782	10	33996555	34019624	9	3
ENSMUSG00000019785	10	33512286	33624769	12	1
ENSMUSG00000019790	10	9755547	9901079	50	1
ENSMUSG00000019791	10	30608141	30618479	12	3
ENSMUSG00000019795	10	7629373	7681136	25	8
ENSMUSG00000019796	10	7589800	7625483	16	2
ENSMUSG00000019797	10	43525121	43540994	11	3
ENSMUSG00000019802	10	42761496	42832514	33	6
ENSMUSG00000019806	10	13647054	13868980	20	1
ENSMUSG00000019809	10	13523842	13553142	26	5
ENSMUSG00000019810	10	13499540	13519035	20	3
ENSMUSG00000019818	10	41519414	41531048	12	3
ENSMUSG00000019820	10	12382188	12861735	74	7
ENSMUSG00000019828	10	10686059	11082356	22	2
ENSMUSG00000019831	10	40883475	40938570	11	2
ENSMUSG00000019837	10	40249203	40257665	6	1
ENSMUSG00000019843	10	39368855	39565381	29	1
ENSMUSG00000019851	10	18845071	18857073	3	1
ENSMUSG00000019852	10	18588011	18743758	34	1
ENSMUSG00000019861	10	52337024	52382124	9	2
ENSMUSG00000019864	10	43901807	43947862	10	1
ENSMUSG00000019874	10	57784881	57788450	6	4
ENSMUSG00000019877	10	57515774	57532530	20	8
ENSMUSG00000019888	10	101681487	102391469	33	1
ENSMUSG00000019889	10	28074820	28597397	32	1
ENSMUSG00000019890	10	102481760	102490418	4	1
ENSMUSG00000019897	10	105841067	105847833	8	5
ENSMUSG00000019899	10	26980036	27619758	77	2
ENSMUSG00000019906	10	107271843	107425143	7	2
ENSMUSG00000019907	10	108162400	108277575	26	9
ENSMUSG00000019916	10	59323296	59373304	20	3
ENSMUSG00000019923	10	72654845	72674964	20	2
ENSMUSG00000019943	10	98915152	99026143	21	3
ENSMUSG00000019951	10	89744991	89819869	21	2
ENSMUSG00000019960	10	99263231	99267488	3	2
ENSMUSG00000019969	12	83688203	83735199	14	1
ENSMUSG00000019970	10	21882184	21999903	37	4
ENSMUSG00000019971	10	100488289	100573655	53	1
ENSMUSG00000019975	10	91082940	91102607	13	1
ENSMUSG00000019977	10	21295979	21368889	19	4
ENSMUSG00000019978	10	25359798	25523519	21	5
ENSMUSG00000019986	10	20952547	21080428	25	2
ENSMUSG00000019997	10	24595442	24598683	11	2
ENSMUSG00000019998	10	24149317	24188959	10	5
ENSMUSG00000020014	10	92775619	93081618	83	1
ENSMUSG00000020015	10	93160876	93241342	17	3
ENSMUSG00000020022	10	94198955	94221443	11	4
ENSMUSG00000020024	10	94688790	94790336	16	1
ENSMUSG00000020044	10	86300372	86349506	11	1
ENSMUSG00000020064	10	63243797	63317881	25	3
ENSMUSG00000020069	10	63014664	63024217	21	1
ENSMUSG00000020074	10	62743928	62792368	25	5
ENSMUSG00000020076	10	62616023	62651218	15	1
ENSMUSG00000020083	10	62107655	62143920	29	3
ENSMUSG00000020088	10	61680310	61693295	7	5
ENSMUSG00000020101	10	60346851	60372684	21	3
ENSMUSG00000020109	10	59879556	59899302	19	1
ENSMUSG00000020111	10	59702477	59864132	38	4
ENSMUSG00000020114	10	119199255	119240055	21	7
ENSMUSG00000020115	10	121546455	121586794	21	4
ENSMUSG00000020116	11	17203198	17211568	9	2
ENSMUSG00000020121	10	121780991	122047315	30	2
ENSMUSG00000020128	11	21239281	21321136	35	1
ENSMUSG00000020135	10	80295977	80318263	28	3
ENSMUSG00000020142	11	20302180	20332713	10	2
ENSMUSG00000020151	10	116018213	116274932	25	4
ENSMUSG00000020152	11	20062304	20112913	13	4
ENSMUSG00000020153	10	80249121	80256794	22	7
ENSMUSG00000020156	10	80226434	80243903	41	3
ENSMUSG00000020173	11	12236608	12464960	32	3
ENSMUSG00000020176	11	11930508	12038683	28	2
ENSMUSG00000020180	10	75517551	75537373	6	3
ENSMUSG00000020181	10	109682660	110456204	50	3
ENSMUSG00000020186	10	110920177	110939599	6	1
ENSMUSG00000020189	10	111164802	111297247	24	2
ENSMUSG00000020196	10	75646110	75764357	37	1
ENSMUSG00000020198	10	80706978	80742211	31	1
ENSMUSG00000020220	4	144972622	145195005	89	3
ENSMUSG00000020224	10	120227070	120232071	5	2
ENSMUSG00000020225	10	120201590	120224917	24	7
ENSMUSG00000020231	10	76259429	76345291	57	2
ENSMUSG00000020235	10	81366222	81378516	28	1
ENSMUSG00000020241	10	76595762	76623630	31	2
ENSMUSG00000020250	10	82859206	82897724	15	1
ENSMUSG00000020255	10	83360221	83368835	4	1
ENSMUSG00000020260	10	77259300	77269586	9	1
ENSMUSG00000020263	10	83600033	83648738	56	2
ENSMUSG00000020267	11	54866383	54870501	6	3
ENSMUSG00000020271	11	32642724	32746816	22	3
ENSMUSG00000020277	10	77986947	78010083	27	6
ENSMUSG00000020290	11	23256041	23298249	42	7
ENSMUSG00000020297	11	32000463	32059202	8	4
ENSMUSG00000020315	11	30099395	30268175	48	6
ENSMUSG00000020321	11	21556787	21572367	17	8
ENSMUSG00000020326	11	40748552	40755311	10	1
ENSMUSG00000020329	10	79736123	79746581	50	1
ENSMUSG00000020333	11	54303798	54364756	50	10
ENSMUSG00000020340	11	46193850	46312859	39	5
ENSMUSG00000020358	11	51600100	51606847	11	4
ENSMUSG00000020361	11	53259814	53300457	22	8
ENSMUSG00000020368	11	50293961	50325673	23	7
ENSMUSG00000020375	11	50389286	50431125	24	3
ENSMUSG00000020376	11	50025346	50104758	12	2
ENSMUSG00000020387	11	51813455	51857653	18	1
ENSMUSG00000020389	11	52004221	52089784	45	1
ENSMUSG00000020390	11	51985497	52000762	12	4
ENSMUSG00000020397	11	46436925	46442721	22	1
ENSMUSG00000020400	11	54910785	54962917	41	2
ENSMUSG00000020402	11	52360860	52389397	18	4
ENSMUSG00000020409	11	43433744	43447981	26	4
ENSMUSG00000020431	11	7063489	7178506	24	4
ENSMUSG00000020436	11	41910203	42000857	16	3
ENSMUSG00000020440	6	28423560	28426602	10	1
ENSMUSG00000020451	11	3344256	3409189	39	1
ENSMUSG00000020454	11	3202392	3244588	45	4
ENSMUSG00000020457 ENSMUSG00000023764	11	3131850	3266415	91	1
ENSMUSG00000020458	11	29692947	29744331	24	5
ENSMUSG00000020459	11	29526408	29545279	30	7
ENSMUSG00000020460	11	29545846	29548109	15	7
ENSMUSG00000020462	11	29221532	29247409	18	12
ENSMUSG00000020467	11	28853204	28926743	13	1
ENSMUSG00000020473	11	5861947	5872088	25	1
ENSMUSG00000020476	11	5788488	5800962	19	5
ENSMUSG00000020477 ENSMUSG00000049680	11	5703983	5762376	33	5
ENSMUSG00000020483	11	87979525	87987533	10	1
ENSMUSG00000020486 ENSMUSG00000090107	11	87566653	87590539	49	2
ENSMUSG00000020496	11	58932288	58938916	4	3
ENSMUSG00000020515	11	58104153	58118594	12	3
ENSMUSG00000020516	11	86498871	86544805	29	2
ENSMUSG00000020521	11	86484657	86499025	13	2
ENSMUSG00000020524	11	57011387	57330244	26	5
ENSMUSG00000020530	11	84832361	84870817	43	4
ENSMUSG00000020532	11	84129672	84401651	70	1
ENSMUSG00000020536	11	60699723	60714186	26	1
ENSMUSG00000020547	12	36091846	36156825	12	1
ENSMUSG00000020564	12	33147693	33375659	39	2
ENSMUSG00000020571	12	17266545	17284770	21	2
ENSMUSG00000020580	12	16894978	16988274	33	10
ENSMUSG00000020589	12	12262139	12376359	13	6
ENSMUSG00000020590	12	35047189	35147469	28	3
ENSMUSG00000020594	12	8674134	8752581	55	3
ENSMUSG00000020598	12	44328885	44601846	32	11
ENSMUSG00000020601	12	15791727	15816877	7	3
ENSMUSG00000020607	12	14147599	14152038	2	2
ENSMUSG00000020608	12	11265886	11319785	27	4
ENSMUSG00000020610	11	109425946	109452813	23	1
ENSMUSG00000020611	11	109362831	109401369	5	1
ENSMUSG00000020612	11	109649405	109669656	17	6
ENSMUSG00000020620	11	109932190	109995845	41	1
ENSMUSG00000020623	11	110399122	110525522	18	2
ENSMUSG00000020634	12	4879032	4907705	11	1
ENSMUSG00000020640	12	4593008	4713950	39	3
ENSMUSG00000020644	12	25093801	25096092	3	3
ENSMUSG00000020646	12	24831599	24960301	13	2
ENSMUSG00000020647	12	4247363	4477182	23	2
ENSMUSG00000020650	12	31595354	31634658	9	1
ENSMUSG00000020656	12	24572287	24617391	18	3
ENSMUSG00000020658	12	3962554	4038915	23	5
ENSMUSG00000020659	12	31484829	31499616	20	1
ENSMUSG00000020661	12	3806007	3914443	63	2
ENSMUSG00000020664	12	31331564	31351437	14	3
ENSMUSG00000020671	12	3247430	3309969	6	3
ENSMUSG00000020687	11	104502745	104550620	28	3
ENSMUSG00000020694	11	105178807	105283959	44	4
ENSMUSG00000020704	11	80880169	81968457	11	1
ENSMUSG00000020705	11	106216926	106249139	20	8
ENSMUSG00000020715	11	106394650	106487852	31	1
ENSMUSG00000020716	11	79339693	79581612	73	5
ENSMUSG00000020719 ENSMUSG00000093273 ENSMUSG00000093133	11	106780355	106789185	40	4
ENSMUSG00000020720	11	107479484	107504362	15	9
ENSMUSG00000020721	11	107547930	107693826	50	2
ENSMUSG00000020738	11	115523102	115536276	13	6
ENSMUSG00000020755	11	115933282	115966725	17	3
ENSMUSG00000020776	11	116142285	116168166	62	3
ENSMUSG00000020783	11	73047783	73080217	18	5
ENSMUSG00000020790	11	72690006	72772146	32	6
ENSMUSG00000020792	11	116288001	116307233	35	11
ENSMUSG00000020794	11	72607283	72686481	9	1
ENSMUSG00000020802	11	116537740	116581447	22	1
ENSMUSG00000020807	11	72153929	72207459	35	2
ENSMUSG00000020811	11	71749920	71789647	16	1
ENSMUSG00000020817	11	70844778	70943105	35	6
ENSMUSG00000020823	11	117115168	117159268	28	4
ENSMUSG00000020827	11	70562881	70614483	62	5
ENSMUSG00000020840	11	76924809	76987379	32	13
ENSMUSG00000020841	11	76778424	76847018	25	2
ENSMUSG00000020849	11	75732869	75765845	15	4
ENSMUSG00000020850	11	75486816	75509449	49	4
ENSMUSG00000020859	11	93996091	94126085	56	14
ENSMUSG00000020863	11	94287890	94321988	33	3
ENSMUSG00000020864	11	94328001	94341841	14	1
ENSMUSG00000020869	11	94629767	94645216	9	1
ENSMUSG00000020873	11	95384692	95391776	18	1
ENSMUSG00000020886	11	70017085	70045532	46	10
ENSMUSG00000020893	11	69095217	69109960	33	5
ENSMUSG00000020894	11	69088490	69092384	16	1
ENSMUSG00000020900	11	68691559	68816632	62	13
ENSMUSG00000020917	11	100476353	100528000	40	5
ENSMUSG00000020919	11	100780731	100850724	23	1
ENSMUSG00000020921	11	102152546	102156404	9	1
ENSMUSG00000020922	11	102162497	102185296	15	2
ENSMUSG00000020923	11	102304560	102319742	42	11
ENSMUSG00000020925	11	102684686	102697782	14	1
ENSMUSG00000020926	11	102761439	102780262	44	5
ENSMUSG00000020932	11	102887336	102900912	13	4
ENSMUSG00000020936	11	103028190	103068912	18	3
ENSMUSG00000020946	11	103676849	103697898	10	1
ENSMUSG00000020948	12	64942440	64965536	5	2
ENSMUSG00000020949	12	65062436	65073944	7	5
ENSMUSG00000020952	12	51377580	51450096	25	2
ENSMUSG00000020954	12	51608541	51691914	18	8
ENSMUSG00000020955	12	51690966	51738939	6	1
ENSMUSG00000020962	12	91555916	91590487	13	3
ENSMUSG00000020982	12	69311544	69357176	33	1
ENSMUSG00000020986	12	58958383	59012017	27	8
ENSMUSG00000021000	12	59129720	59191583	62	10
ENSMUSG00000021003	12	98202304	98259459	17	1
ENSMUSG00000021012	12	98746968	98787774	18	3
ENSMUSG00000021022	12	55280814	55303000	14	3
ENSMUSG00000021024	12	55384222	55418454	13	1
ENSMUSG00000021027 ENSMUSG00000092949	12	55602929	55821167	44	6
ENSMUSG00000021028	12	56328306	56345894	9	1
ENSMUSG00000021037	12	87266746	87273997	9	2
ENSMUSG00000021039	12	87449936	87472299	14	3
ENSMUSG00000021047	12	46694517	46818775	5	1
ENSMUSG00000021048	12	76255232	76319820	28	4
ENSMUSG00000021051	12	75450883	75596200	14	9
ENSMUSG00000021057	12	76324891	76334153	6	4
ENSMUSG00000021062	12	76797960	76822908	19	1
ENSMUSG00000021065	12	77238104	77476338	15	3
ENSMUSG00000021071	12	70244539	70347614	15	1
ENSMUSG00000021097	12	104763114	104865076	14	2
ENSMUSG00000021109	12	73901375	73947530	23	2
ENSMUSG00000021111	12	105784694	105838944	62	1
ENSMUSG00000021112	12	78748947	78840711	15	2
ENSMUSG00000021113	12	73964530	73984820	10	2
ENSMUSG00000021114	12	78842989	78861638	9	2
ENSMUSG00000021116	12	78861819	78887010	8	2
ENSMUSG00000021134	12	80945504	80950507	33	5
ENSMUSG00000021139 ENSMUSG00000090935 ENSMUSG00000091803	12	81358860	81532911	46	4
ENSMUSG00000021140	12	81860030	82000924	36	2
ENSMUSG00000021143	12	113014508	113074401	24	1
ENSMUSG00000021147	13	8802968	8871909	48	10
ENSMUSG00000021149	13	8972071	8996017	17	5
ENSMUSG00000021156	13	9684836	9765321	53	1
ENSMUSG00000021171	12	116281222	116373096	22	4
ENSMUSG00000021178	12	100110186	100123364	11	2
ENSMUSG00000021179	12	100125452	100159653	14	3
ENSMUSG00000021182	12	100912700	101028983	31	1
ENSMUSG00000021188	12	101834043	101913267	35	6
ENSMUSG00000021190	12	102394084	102439813	18	1
ENSMUSG00000021192	12	102469134	102497902	14	4
ENSMUSG00000021193	13	6548157	6580139	27	2
ENSMUSG00000021194	12	102554969	102565027	8	3
ENSMUSG00000021198 ENSMUSG00000098628	12	102948859	103184065	74	3
ENSMUSG00000021203	12	103388682	103406350	14	2
ENSMUSG00000021209	12	103532283	103613831	36	2
ENSMUSG00000021215	13	3882565	3918220	13	1
ENSMUSG00000021224	12	83794034	83921934	31	4
ENSMUSG00000021236	12	84373857	84409029	28	6
ENSMUSG00000021238	12	84430723	84450950	12	1
ENSMUSG00000021241	12	84773270	84775089	4	2
ENSMUSG00000021242	12	84754560	84773112	4	3
ENSMUSG00000021244	12	84996321	85070515	36	10
ENSMUSG00000021248	12	85340614	85374717	5	1
ENSMUSG00000021250	12	85473890	85477273	10	1
ENSMUSG00000021270	12	110690605	110702728	29	12
ENSMUSG00000021275	12	110889264	110972394	22	1
ENSMUSG00000021276	12	110872610	110889145	5	1
ENSMUSG00000021279	12	111292972	111377718	37	10
ENSMUSG00000021282	12	111538101	111546753	14	7
ENSMUSG00000021285	12	111828458	111908055	19	2
ENSMUSG00000021288	12	111758849	111807844	34	4
ENSMUSG00000021301	13	14226438	14523226	29	5
ENSMUSG00000021313	13	11553103	12106945	107	5
ENSMUSG00000021314	13	18948371	19150913	21	10
ENSMUSG00000021338	13	24012344	24280795	63	1
ENSMUSG00000021357	13	30813919	30974047	30	2
ENSMUSG00000021365	13	41309916	41487320	9	1
ENSMUSG00000021366	13	42052021	42185026	9	1
ENSMUSG00000021371	13	43538412	43560191	9	1
ENSMUSG00000021373	13	46501848	46649642	18	1
ENSMUSG00000021374	13	46679905	46727940	30	2
ENSMUSG00000021377	13	47084775	47106201	20	4
ENSMUSG00000021392	13	49653350	49679015	18	1
ENSMUSG00000021413	13	34875494	34902877	15	1
ENSMUSG00000021427	13	37971401	37994190	8	3
ENSMUSG00000021466	13	63508328	63573598	40	1
ENSMUSG00000021476	13	64161866	64186536	8	3
ENSMUSG00000021477	13	64363214	64370306	8	1
ENSMUSG00000021478	13	54051186	54055658	2	1
ENSMUSG00000021481	13	55105311	55134825	32	1
ENSMUSG00000021482	13	64291836	64312710	6	1
ENSMUSG00000021484	13	55343833	55362783	8	2
ENSMUSG00000021486	13	55322055	55325271	5	2
ENSMUSG00000021488	13	55209782	55318325	23	4
ENSMUSG00000021497	13	55714650	55726221	5	2
ENSMUSG00000021500	13	55635027	55681256	24	3
ENSMUSG00000021501	13	55623005	55632411	7	1
ENSMUSG00000021514	13	65278814	65304221	14	3
ENSMUSG00000021519	13	66906968	66933088	34	1
ENSMUSG00000021534	13	68597439	68614231	3	1
ENSMUSG00000021546	13	58391142	58403343	59	9
ENSMUSG00000021548	13	85189408	85223469	23	3
ENSMUSG00000021549	13	85214780	85289029	41	5
ENSMUSG00000021555	13	59585259	59634798	56	1
ENSMUSG00000021557	13	59449537	59585227	72	19
ENSMUSG00000021559	13	60601947	60763185	29	4
ENSMUSG00000021573	13	74009407	74035753	11	5
ENSMUSG00000021577	13	74322254	74350280	32	12
ENSMUSG00000021578	13	74350309	74365783	16	2
ENSMUSG00000021589	13	75869537	75943925	16	2
ENSMUSG00000021595	13	69533746	69635780	35	1
ENSMUSG00000021597	13	77043088	77135473	33	7
ENSMUSG00000021606	13	73319874	73328542	7	1
ENSMUSG00000021607	13	73331009	73332175	2	1
ENSMUSG00000021608	13	73467197	73516422	22	1
ENSMUSG00000021610	13	73604002	73620639	17	1
ENSMUSG00000021639	13	100460218	100492579	33	1
ENSMUSG00000021643	13	100107997	100114571	16	2
ENSMUSG00000021646	13	99948533	100015639	17	1
ENSMUSG00000021650	13	99319649	99344678	10	2
ENSMUSG00000021660	13	98309896	98317006	15	5
ENSMUSG00000021661	13	98263158	98274750	20	2
ENSMUSG00000021662	13	97898595	98206165	36	5
ENSMUSG00000021665	13	97176332	97198357	14	3
ENSMUSG00000021668	13	96480689	96542485	18	2
ENSMUSG00000021669	13	96542618	96640167	21	1
ENSMUSG00000021670	13	96648967	96670936	45	1
ENSMUSG00000021671	13	96388294	96415587	13	1
ENSMUSG00000021676	13	95627177	95891922	36	5
ENSMUSG00000021680	13	95431371	95444831	7	2
ENSMUSG00000021684	13	95024454	95250336	47	1
ENSMUSG00000021686	13	94358960	94566316	27	1
ENSMUSG00000021687	13	94201310	94285857	16	8
ENSMUSG00000021690	13	93430097	93499808	11	3
ENSMUSG00000021693	13	106958996	107022126	37	2
ENSMUSG00000021699	13	108449948	109953461	56	1
ENSMUSG00000021700	13	110054187	110280206	5	1
ENSMUSG00000021701	13	110395044	110400844	14	2
ENSMUSG00000021706	13	92487108	92530868	24	1
ENSMUSG00000021709	13	103818787	103920514	35	3
ENSMUSG00000021710	13	104023439	104109614	13	3
ENSMUSG00000021711	13	104142149	104178469	26	5
ENSMUSG00000021712	13	104178797	104203372	17	5
ENSMUSG00000021716	13	104792484	104839274	14	3
ENSMUSG00000021719	13	104947153	105054930	6	2
ENSMUSG00000021728	13	117220625	117274098	9	3
ENSMUSG00000021730	13	117602480	117976802	8	1
ENSMUSG00000021733	14	14703025	14799943	25	1
ENSMUSG00000021737	14	14112184	14120984	14	7
ENSMUSG00000021738	14	14012491	14107296	12	1
ENSMUSG00000021745	14	11553532	12242041	42	1
ENSMUSG00000021747	14	8431192	8666240	16	1
ENSMUSG00000021750	14	8296274	8318023	11	2
ENSMUSG00000021764	13	114287795	114388094	5	2
ENSMUSG00000021771	14	21831269	21845879	28	6
ENSMUSG00000021779	14	17660960	18038088	14	2
ENSMUSG00000021782	14	24133953	24245920	44	3
ENSMUSG00000021792	14	40993740	41013788	24	7
ENSMUSG00000021794	14	34310727	34345144	21	7
ENSMUSG00000021810	14	20319859	20348121	14	1
ENSMUSG00000021811	14	20384638	20388910	5	4
ENSMUSG00000021814	14	20455261	20480133	14	2
ENSMUSG00000021819	14	20707552	20723618	26	1
ENSMUSG00000021820	14	20734875	20794088	21	1
ENSMUSG00000021824	14	21031442	21052508	29	4
ENSMUSG00000021830	14	45134448	45220328	45	6
ENSMUSG00000021831	14	45283092	45318572	16	4
ENSMUSG00000021838	14	46882854	47105817	27	1
ENSMUSG00000021843	14	47648448	47736564	77	7
ENSMUSG00000021870	14	26413168	26534931	55	12
ENSMUSG00000021891	14	31478320	31495030	6	1
ENSMUSG00000021893	14	31336638	31371986	26	3
ENSMUSG00000021895	14	27238039	27403904	11	2
ENSMUSG00000021901	14	31251450	31259944	38	7
ENSMUSG00000021910	14	31170930	31216946	77	11
ENSMUSG00000021911	14	32201949	32297550	37	1
ENSMUSG00000021913	14	32322019	32347820	24	4
ENSMUSG00000021917	14	30999826	31001672	17	1
ENSMUSG00000021918	14	30951486	30987439	15	4
ENSMUSG00000021929	14	61365186	61439947	17	1
ENSMUSG00000021930	14	61531993	61556886	7	1
ENSMUSG00000021936	14	33377898	33447158	31	4
ENSMUSG00000021938	14	56722441	56778316	14	5
ENSMUSG00000021939	14	63122462	63145919	10	6
ENSMUSG00000021945	14	56887795	56962579	24	4
ENSMUSG00000021962	14	30479565	30527056	10	1
ENSMUSG00000021967	14	57826239	57828745	2	1
ENSMUSG00000021981	14	59440981	59548903	11	1
ENSMUSG00000021982	14	59560896	59597836	13	4
ENSMUSG00000021983	14	59647531	60197179	47	4
ENSMUSG00000021987	14	60265205	60302370	14	7
ENSMUSG00000021991	14	28904943	29721864	38	1
ENSMUSG00000021994	14	28504750	28527447	17	1
ENSMUSG00000022000	14	75284373	75344426	19	4
ENSMUSG00000022008	14	76086232	76110815	8	4
ENSMUSG00000022010	14	76414961	76507765	43	3
ENSMUSG00000022016	14	78492246	78536860	14	7
ENSMUSG00000022022	14	79397772	79423650	11	1
ENSMUSG00000022023	14	79459937	79481268	10	1
ENSMUSG00000022035	14	65837302	65866604	9	6
ENSMUSG00000022037	14	65968483	65981548	26	2
ENSMUSG00000022040	14	66084377	66124500	19	1
ENSMUSG00000022043	14	66297031	66311424	8	2
ENSMUSG00000022048	14	66802864	66868688	14	3
ENSMUSG00000022052	14	67014057	67072471	10	1
ENSMUSG00000022055	14	68083863	68089095	4	2
ENSMUSG00000022075	14	69784990	69805530	10	1
ENSMUSG00000022092	14	70217898	70289449	14	2
ENSMUSG00000022094	14	70303469	70351425	37	1
ENSMUSG00000022100	14	70654246	70766628	29	1
ENSMUSG00000022103	14	70890130	70979838	9	1
ENSMUSG00000022108	14	73362231	73385271	6	1
ENSMUSG00000022110	14	73525319	73596142	27	5
ENSMUSG00000022111	14	101653967	101696124	9	4
ENSMUSG00000022122	14	103814625	103844173	10	1
ENSMUSG00000022124	14	103080239	103099566	17	6
ENSMUSG00000022136	14	118937932	118981702	12	5
ENSMUSG00000022139	14	120275669	120431697	9	1
ENSMUSG00000022141	15	8291225	8444463	47	5
ENSMUSG00000022151	15	5185525	5218336	12	1
ENSMUSG00000022159	14	52261759	52279545	24	4
ENSMUSG00000022174	14	54235479	54254104	5	2
ENSMUSG00000022180	14	54722216	54781886	11	1
ENSMUSG00000022185	14	54642161	54686931	69	6
ENSMUSG00000022186	15	4026383	4155344	26	1
ENSMUSG00000022191	15	12824815	12935290	54	2
ENSMUSG00000022193 ENSMUSG00000076128	14	54614120	54617995	5	1
ENSMUSG00000022199	14	54906727	54913132	9	1
ENSMUSG00000022200	15	12321496	12351265	4	1
ENSMUSG00000022201	15	12117831	12185683	39	12
ENSMUSG00000022204	14	55015454	55024135	11	6
ENSMUSG00000022205	15	11981339	11996983	11	2
ENSMUSG00000022208	14	55106830	55116935	12	1
ENSMUSG00000022210	14	55478758	55490338	8	1
ENSMUSG00000022212	14	55510445	55517431	35	5
ENSMUSG00000022214	14	55560006	55570065	67	1
ENSMUSG00000022216	14	55578123	55581529	43	2
ENSMUSG00000022223	14	55897286	55900232	6	2
ENSMUSG00000022228	13	21442175	21453730	8	1
ENSMUSG00000022234	15	31590800	31601847	20	10
ENSMUSG00000022235	15	31568791	31590119	10	1
ENSMUSG00000022240	15	30172593	31029311	23	9
ENSMUSG00000022247	15	10474779	10485947	19	1
ENSMUSG00000022255	15	34082694	34142386	35	4
ENSMUSG00000022261	15	32920723	33034730	8	2
ENSMUSG00000022262	15	28203752	28472045	79	1
ENSMUSG00000022263	15	27730652	28025848	57	7
ENSMUSG00000022265 ENSMUSG00000098416	15	27466677	27594909	15	6
ENSMUSG00000022270	15	25843264	25973687	12	1
ENSMUSG00000022272	15	25622525	25813673	65	4
ENSMUSG00000022283	15	36595661	36608973	26	11
ENSMUSG00000022285	15	36770770	36794547	20	4
ENSMUSG00000022295	15	38661904	38692443	13	8
ENSMUSG00000022300	15	39112865	39146856	11	1
ENSMUSG00000022307	15	41447482	41861048	23	8
ENSMUSG00000022321	15	18818947	19014236	20	3
ENSMUSG00000022323	15	34484021	34495255	14	3
ENSMUSG00000022329	15	34875496	35155806	18	1
ENSMUSG00000022332	15	68928420	69093512	9	1
ENSMUSG00000022337	15	43477229	43527777	11	7
ENSMUSG00000022340	15	44671859	44788063	9	2
ENSMUSG00000022342	15	45106284	45114934	3	3
ENSMUSG00000022351	15	59315077	59331192	17	1
ENSMUSG00000022360	15	58094047	58135082	28	3
ENSMUSG00000022362 ENSMUSG00000022361 ENSMUSG00000101892	15	58022259	58076541	40	9
ENSMUSG00000022364	15	57912199	57970067	35	1
ENSMUSG00000022365	15	57869502	57892418	8	1
ENSMUSG00000022376	15	64699042	64922296	18	1
ENSMUSG00000022377	15	64086857	64382919	59	6
ENSMUSG00000022378	15	63929097	64060448	14	1
ENSMUSG00000022389	15	81802421	81826861	23	2
ENSMUSG00000022390	15	81744848	81796269	23	3
ENSMUSG00000022391	15	81704248	81729919	20	6
ENSMUSG00000022400	15	81466316	81476369	5	2
ENSMUSG00000022403	15	81363669	81400077	23	10
ENSMUSG00000022415	15	80091334	80119501	10	3
ENSMUSG00000022416	15	80287238	80398279	45	2
ENSMUSG00000022419	15	55112317	55259271	13	1
ENSMUSG00000022425	15	54838898	54920146	34	1
ENSMUSG00000022433	15	79417856	79443919	34	8
ENSMUSG00000022434	15	85037062	85062828	9	1
ENSMUSG00000022436	15	78899667	78919517	29	1
ENSMUSG00000022442	15	83483772	83510893	24	2
ENSMUSG00000022443	15	77760587	77842175	54	3
ENSMUSG00000022450	15	82350139	82354291	3	2
ENSMUSG00000022453	15	82329532	82338826	10	1
ENSMUSG00000022454	15	95219451	95528706	23	1
ENSMUSG00000022462	15	96687394	96699698	16	1
ENSMUSG00000022472	15	81992523	82033862	20	1
ENSMUSG00000022474	15	81951108	81960930	22	5
ENSMUSG00000022476	15	81915030	81926213	6	1
ENSMUSG00000022477	15	81872309	81915133	29	8
ENSMUSG00000022489	15	103503298	103530052	16	1
ENSMUSG00000022490	15	103530279	103537992	7	1
ENSMUSG00000022500	16	10959275	11066157	10	2
ENSMUSG00000022507	16	8830100	8858916	4	4
ENSMUSG00000022508	16	23965052	23988852	14	1
ENSMUSG00000022514	16	26581704	26730117	28	9
ENSMUSG00000022515	16	4941415	4964237	17	1
ENSMUSG00000022521	16	4081328	4213407	34	3
ENSMUSG00000022523	16	28160120	28445227	5	2
ENSMUSG00000022525	16	29209695	29230531	11	2
ENSMUSG00000022536	16	5013906	5049910	17	5
ENSMUSG00000022537	16	30511855	30550842	28	1
ENSMUSG00000022538	16	30560494	30587592	32	1
ENSMUSG00000022548	16	31296192	31314808	18	1
ENSMUSG00000022558 ENSMUSG00000099260	15	76380261	76453038	88	1
ENSMUSG00000022562	15	76296597	76328015	45	1
ENSMUSG00000022564	15	76246807	76249904	7	2
ENSMUSG00000022565 ENSMUSG00000063268	15	76170974	76243441	79	6
ENSMUSG00000022568	15	76047158	76069784	42	1
ENSMUSG00000022577	15	75551268	75567255	25	4
ENSMUSG00000022587	15	74955051	74959905	39	10
ENSMUSG00000022594	15	74747852	74753046	9	1
ENSMUSG00000022607	15	73205105	73423191	34	5
ENSMUSG00000022619	15	89453913	89464468	14	3
ENSMUSG00000022623	15	89499623	89560261	33	1
ENSMUSG00000022629	15	90933276	91049948	39	3
ENSMUSG00000022636	16	52248996	52454074	27	15
ENSMUSG00000022658	16	45711230	45724608	4	1
ENSMUSG00000022661	16	45382135	45409053	27	5
ENSMUSG00000022663	16	45158785	45188538	14	5
ENSMUSG00000022664	16	45139573	45158706	26	1
ENSMUSG00000022680	16	13833148	13903131	58	3
ENSMUSG00000022681 ENSMUSG00000099314	16	13819232	13835451	25	1
ENSMUSG00000022682	16	13780699	13814840	18	3
ENSMUSG00000022685	16	13537964	13668170	24	9
ENSMUSG00000022696	16	44240180	44333196	35	3
ENSMUSG00000022698	16	44139830	44163366	13	1
ENSMUSG00000022708 ENSMUSG00000076372	16	42875881	43642602	57	1
ENSMUSG00000022710	16	8689595	8792308	60	10
ENSMUSG00000022742	16	58670208	58680391	7	1
ENSMUSG00000022747	16	58468125	58524243	38	1
ENSMUSG00000022752	16	57121714	57154530	12	2
ENSMUSG00000022760	16	17527982	17531136	20	1
ENSMUSG00000022761	16	17508688	17526333	47	3
ENSMUSG00000022762	16	81200697	81624285	19	2
ENSMUSG00000022763	16	17489611	17507485	35	4
ENSMUSG00000022769	16	17130138	17132383	3	1
ENSMUSG00000022770	16	31663443	31873356	61	3
ENSMUSG00000022771	16	17086555	17111257	42	4
ENSMUSG00000022774	16	31948513	31961781	13	6
ENSMUSG00000022779	16	16870736	16892990	68	1
ENSMUSG00000022781	16	32016290	32079342	17	1
ENSMUSG00000022787	16	32247227	32257083	10	1
ENSMUSG00000022788	16	16416917	16600549	37	2
ENSMUSG00000022789	16	16312235	16359030	21	1
ENSMUSG00000022790	16	38901471	39027159	9	1
ENSMUSG00000022800	16	32877500	32908963	31	1
ENSMUSG00000022801	16	32914100	33015647	41	1
ENSMUSG00000022808	16	33251456	33299562	14	4
ENSMUSG00000022812	16	38089001	38246084	18	1
ENSMUSG00000022816	16	37776873	37836514	24	3
ENSMUSG00000022822	16	20331303	20426394	59	4
ENSMUSG00000022829	16	37114942	37384962	39	2
ENSMUSG00000022837	16	36828385	36872721	31	1
ENSMUSG00000022840	16	35154877	35305737	21	1
ENSMUSG00000022841	16	20535478	20544909	33	2
ENSMUSG00000022855	16	22009484	22049269	17	5
ENSMUSG00000022858	16	22244549	22266005	21	2
ENSMUSG00000022861	16	22468461	22657221	32	4
ENSMUSG00000022865	16	78301496	78359785	10	1
ENSMUSG00000022884 ENSMUSG00000064382 ENSMUSG00000064880 ENSMUSG00000088524 ENSMUSG00000087935 ENSMUSG00000065208	16	23107444	23114136	71	6
ENSMUSG00000022885	16	23224740	23360350	18	2
ENSMUSG00000022892	16	84954440	85173707	16	1
ENSMUSG00000022893	16	85793827	85803113	13	1
ENSMUSG00000022905	16	35978750	36037131	35	2
ENSMUSG00000022914	16	95992092	96082526	67	4
ENSMUSG00000022940 ENSMUSG00000089814	16	94358763	94371015	18	2
ENSMUSG00000022960 ENSMUSG00000022956	16	91677268	91931687	39	14
ENSMUSG00000022961	16	91647506	91679221	42	3
ENSMUSG00000022964	16	91574503	91597800	10	5
ENSMUSG00000022972	16	90925809	90934927	17	1
ENSMUSG00000022973	16	90936092	91011308	54	13
ENSMUSG00000022982	16	90220742	90226322	5	5
ENSMUSG00000022992	15	98518821	98534244	15	2
ENSMUSG00000022995	1	181896384	182019990	47	2
ENSMUSG00000023004	15	98931425	98934565	7	1
ENSMUSG00000023010	15	99392882	99410049	28	3
ENSMUSG00000023011	15	99497005	99528017	12	8
ENSMUSG00000023018	15	99702287	99713995	13	3
ENSMUSG00000023019	15	99717515	99725005	14	1
ENSMUSG00000023020	15	99725618	99728136	2	2
ENSMUSG00000023021	15	99734881	99772885	24	1
ENSMUSG00000023022	15	99778470	99875428	16	1
ENSMUSG00000023025	15	99970074	100016351	18	3
ENSMUSG00000023026	15	100038664	100219473	44	2
ENSMUSG00000023027	15	100227819	100261244	25	1
ENSMUSG00000023030	15	100387898	100425072	32	1
ENSMUSG00000023032	15	100761747	100823968	38	4
ENSMUSG00000023033	15	100870683	101045929	35	1
ENSMUSG00000023048	15	102459028	102462806	14	3
ENSMUSG00000023050	15	102497649	102517064	34	7
ENSMUSG00000023068	10	52417547	52440192	7	3
ENSMUSG00000023075	4	123734559	123750345	9	2
ENSMUSG00000023079	5	134357669	134456716	33	1
ENSMUSG00000023089	6	24518666	24528013	10	4
ENSMUSG00000023094	2	19371440	19394976	11	5
ENSMUSG00000023118	7	19024377	19054618	45	2
ENSMUSG00000023147	16	96145407	96157852	11	1
ENSMUSG00000023150	1	151344477	151364422	24	1
ENSMUSG00000023156 ENSMUSG00000094130	14	8080367	8091834	8	2
ENSMUSG00000023169	15	96571418	96642913	18	1
ENSMUSG00000023170	11	69913888	69916591	22	1
ENSMUSG00000023175	10	79704491	79711969	21	2
ENSMUSG00000023192	9	106644537	106656109	6	1
ENSMUSG00000023236	2	113776362	113829121	8	4
ENSMUSG00000023277	9	106203108	106215389	20	1
ENSMUSG00000023286	4	155943831	155959604	30	1
ENSMUSG00000023353	5	24452177	24502047	18	6
ENSMUSG00000023456	6	124810586	124814296	18	3
ENSMUSG00000023495	9	106453291	106464012	54	3
ENSMUSG00000023572	2	121008403	121016904	27	5
ENSMUSG00000023805	17	5941280	6044290	57	2
ENSMUSG00000023809	17	7170115	7303313	21	1
ENSMUSG00000023827	17	12118704	12219645	19	1
ENSMUSG00000023845	17	17527723	17624489	18	5
ENSMUSG00000023852	17	15704967	15772610	46	1
ENSMUSG00000023861	17	8282904	8297661	24	6
ENSMUSG00000023885	17	14665500	14694262	22	1
ENSMUSG00000023904	17	23673596	23675227	9	1
ENSMUSG00000023909	17	23736186	23740330	3	1
ENSMUSG00000023913	17	43568098	43612201	24	12
ENSMUSG00000023921	17	40934685	40961989	13	1
ENSMUSG00000023927 ENSMUSG00000103779	17	51736187	51833290	42	7
ENSMUSG00000023932	17	45391892	45433707	16	3
ENSMUSG00000023944	17	45567775	45573271	29	17
ENSMUSG00000023965	17	63057452	63500017	17	3
ENSMUSG00000023967	17	46110986	46128910	17	2
ENSMUSG00000023973	17	46735705	46752214	14	4
ENSMUSG00000023977	17	46928292	47010532	48	2
ENSMUSG00000023984 ENSMUSG00000090115 ENSMUSG00000092558	17	47611582	47686738	34	3
ENSMUSG00000023994	17	48386885	48409906	39	1
ENSMUSG00000024002	17	32196274	32284722	33	5
ENSMUSG00000024007	17	29250803	29264158	11	2
ENSMUSG00000024008	17	29156550	29237797	30	1
ENSMUSG00000024012	17	29332072	29347904	26	13
ENSMUSG00000024030	17	31057698	31115777	17	1
ENSMUSG00000024038	17	31520115	31531326	12	3
ENSMUSG00000024044	17	69156810	69289985	23	3
ENSMUSG00000024045	17	32303676	32321153	14	2
ENSMUSG00000024048	17	70993656	71002878	17	2
ENSMUSG00000024052	17	71182560	71249817	49	4
ENSMUSG00000024054	17	71344489	71475343	65	6
ENSMUSG00000024068	17	74338987	74391113	17	1
ENSMUSG00000024073	17	74528295	74703356	122	8
ENSMUSG00000024074	17	78200248	78376592	17	3
ENSMUSG00000024077	17	78649913	78737196	23	1
ENSMUSG00000024078	17	74717750	74863570	20	1
ENSMUSG00000024081	17	78919006	78937070	16	4
ENSMUSG00000024083	17	64281005	64331916	14	5
ENSMUSG00000024091	17	65580056	65613555	6	1
ENSMUSG00000024096	17	65848433	65885755	11	2
ENSMUSG00000024097	17	80200089	80207305	8	1
ENSMUSG00000024104	6	116208033	116262668	31	7
ENSMUSG00000024109	17	90033644	91092805	58	11
ENSMUSG00000024112	17	25374285	25433783	54	1
ENSMUSG00000024120	17	84705247	84790789	54	5
ENSMUSG00000024121	17	24163866	24169702	15	2
ENSMUSG00000024122	17	24073680	24150924	36	4
ENSMUSG00000024127	17	85063477	85090267	15	4
ENSMUSG00000024130	17	24351950	24410201	46	2
ENSMUSG00000024142	17	24473550	24479078	10	3
ENSMUSG00000024150	17	87254658	87265935	18	4
ENSMUSG00000024151	17	87672330	87723713	25	3
ENSMUSG00000024163 ENSMUSG00000073436	17	24888486	24936977	111	12
ENSMUSG00000024176	17	25565892	25570686	7	2
ENSMUSG00000024188	17	26252910	26285504	31	9
ENSMUSG00000024208	17	27122663	27133916	12	2
ENSMUSG00000024213	17	27579382	27623465	20	3
ENSMUSG00000024218	17	27901122	27909242	10	1
ENSMUSG00000024220	17	28177207	28205886	33	2
ENSMUSG00000024231	18	3382988	3436377	32	5
ENSMUSG00000024234	18	4375592	4397330	9	1
ENSMUSG00000024242	17	80580512	80728093	36	1
ENSMUSG00000024256	17	93199422	93205485	5	3
ENSMUSG00000024259	18	31580168	31609902	8	2
ENSMUSG00000024260	18	31634371	31723061	26	1
ENSMUSG00000024261	18	31437808	31447415	4	4
ENSMUSG00000024268	18	25477632	25753983	14	5
ENSMUSG00000024271	18	24603961	24638830	22	4
ENSMUSG00000024273	18	24470861	24477765	5	1
ENSMUSG00000024276	18	23954688	23964671	4	1
ENSMUSG00000024277	18	23752333	23893861	22	5
ENSMUSG00000024283	18	7868832	7973547	55	5
ENSMUSG00000024286	18	9314044	9450150	10	1
ENSMUSG00000024287	18	9958180	9995484	21	1
ENSMUSG00000024290	18	10064401	10181792	33	5
ENSMUSG00000024293	18	10566602	10610352	19	1
ENSMUSG00000024294	18	10725548	10818704	34	1
ENSMUSG00000024298	17	32771236	32788287	8	3
ENSMUSG00000024302	18	23415415	23659714	22	1
ENSMUSG00000024304	18	16588877	16809246	20	4
ENSMUSG00000024309	17	33938821	33940343	17	1
ENSMUSG00000024317	18	21001341	21028223	8	1
ENSMUSG00000024319	17	33955812	33966984	30	3
ENSMUSG00000024335	17	34112023	34122634	44	2
ENSMUSG00000024346	18	36403679	36454495	4	2
ENSMUSG00000024359	18	34937414	34954357	26	8
ENSMUSG00000024360	18	34902785	34932007	12	4
ENSMUSG00000024382	18	32240300	32270151	19	1
ENSMUSG00000024383	18	32163089	32236751	17	1
ENSMUSG00000024392	17	35135178	35147322	63	5
ENSMUSG00000024393	17	35149076	35164897	44	6
ENSMUSG00000024400	18	31804057	31908987	23	5
ENSMUSG00000024404	18	12128850	12157367	13	1
ENSMUSG00000024410	18	12168717	12189997	40	1
ENSMUSG00000024422	17	35879819	35892670	36	2
ENSMUSG00000024423	18	12972252	12992948	11	3
ENSMUSG00000024424	18	12599926	12737050	19	1
ENSMUSG00000024425	18	38418975	38464399	8	1
ENSMUSG00000024429	17	35979851	35989462	14	5
ENSMUSG00000024431	18	39410545	39491301	25	4
ENSMUSG00000024456	18	37843601	37935476	44	2
ENSMUSG00000024462	17	37045966	37075067	44	3
ENSMUSG00000024474	18	36744656	36757639	20	3
ENSMUSG00000024487	18	40204865	40219399	6	3
ENSMUSG00000024493	18	42202350	42262122	32	1
ENSMUSG00000024500	18	42637432	43059471	22	1
ENSMUSG00000024501	18	43320979	43438286	25	3
ENSMUSG00000024511	18	69979131	70141605	12	5
ENSMUSG00000024515	18	73639009	73703780	23	3
ENSMUSG00000024516	18	65800549	65817665	21	8
ENSMUSG00000024517	18	65872820	65886579	8	1
ENSMUSG00000024524	18	67088336	67226792	13	1
ENSMUSG00000024528	18	52465693	52490738	8	1
ENSMUSG00000024533	18	67488209	67552777	19	3
ENSMUSG00000024539	18	67665511	67724595	18	6
ENSMUSG00000024544	18	67933257	68255549	6	1
ENSMUSG00000024563	18	76241580	76305731	22	1
ENSMUSG00000024566	18	80734143	80934058	29	1
ENSMUSG00000024571 ENSMUSG00000057130	18	80206765	80223533	32	1
ENSMUSG00000024576	18	61555274	61590061	32	4
ENSMUSG00000024579	18	61696837	61707635	11	1
ENSMUSG00000024580	18	61712440	61726331	4	3
ENSMUSG00000024581	18	62977836	62999450	28	3
ENSMUSG00000024583	18	63662801	63692359	8	4
ENSMUSG00000024587	18	64499665	64516557	15	5
ENSMUSG00000024589	18	64887756	65217826	32	3
ENSMUSG00000024593	18	57133090	57297467	27	1
ENSMUSG00000024597	18	57878678	57946821	27	4
ENSMUSG00000024603	18	60526221	60558762	13	2
ENSMUSG00000024604	18	60560736	60572810	20	1
ENSMUSG00000024614	18	90510154	90543267	16	1
ENSMUSG00000024617	18	60925618	60988152	30	14
ENSMUSG00000024621	18	61105572	61132149	24	2
ENSMUSG00000024639	19	16132831	16387463	11	3
ENSMUSG00000024642	19	14448072	14598051	23	3
ENSMUSG00000024654	19	9109868	9135636	10	3
ENSMUSG00000024664	19	10041548	10059671	12	1
ENSMUSG00000024668	19	10500513	10525209	4	1
ENSMUSG00000024712	19	17394043	17401349	8	1
ENSMUSG00000024735	19	10895231	10909559	34	1
ENSMUSG00000024736	19	10857822	10869940	14	1
ENSMUSG00000024740	19	10605625	10629813	27	6
ENSMUSG00000024743	19	10389090	10453181	12	3
ENSMUSG00000024750	19	21272278	21282289	17	3
ENSMUSG00000024758	19	7425901	7483289	12	2
ENSMUSG00000024767	19	7198202	7206316	17	1
ENSMUSG00000024772	19	6276725	6300096	11	1
ENSMUSG00000024789	19	29251828	29313080	25	4
ENSMUSG00000024797 ENSMUSG00000100621 ENSMUSG00000024799 ENSMUSG00000024792	19	6062821	6084944	102	1
ENSMUSG00000024805	19	36379067	36456192	10	1
ENSMUSG00000024810	19	29925114	29960718	17	1
ENSMUSG00000024811	19	36834232	36893477	44	3
ENSMUSG00000024817	19	30030513	30093722	29	3
ENSMUSG00000024826	19	5896516	5913010	28	1
ENSMUSG00000024827	19	30098449	30175418	25	1
ENSMUSG00000024844	19	5364641	5366645	4	2
ENSMUSG00000024851	19	4099998	4113965	50	1
ENSMUSG00000024853	19	5273923	5295455	21	4
ENSMUSG00000024858	19	4286001	4306222	46	1
ENSMUSG00000024862	19	5107746	5118560	37	3
ENSMUSG00000024867	19	24294794	24555872	22	1
ENSMUSG00000024875	19	5088538	5092879	8	1
ENSMUSG00000024878	19	24919916	24961616	15	2
ENSMUSG00000024897	19	23758876	23949597	13	2
ENSMUSG00000024902	19	4962306	4966995	5	3
ENSMUSG00000024908	19	3454933	3575749	25	2
ENSMUSG00000024921	19	26605115	26778321	68	9
ENSMUSG00000024924	19	27216484	27254231	35	3
ENSMUSG00000024935	19	28835049	28913960	20	7
ENSMUSG00000024941	19	5758427	5771401	17	1
ENSMUSG00000024943	19	23206441	23273897	24	5
ENSMUSG00000024947	19	6334979	6340891	37	3
ENSMUSG00000024948	19	6341135	6355615	84	2
ENSMUSG00000024949	19	6363690	6378030	43	5
ENSMUSG00000024952	19	6829085	6840601	20	1
ENSMUSG00000024953	19	6906697	6910106	15	1
ENSMUSG00000024958	19	6938069	6942450	17	1
ENSMUSG00000024966	19	7020696	7040026	14	2
ENSMUSG00000024969	19	7275396	7341860	69	5
ENSMUSG00000024974	19	53600398	53645833	33	8
ENSMUSG00000024975	19	53892231	53929861	15	1
ENSMUSG00000024978	19	55069734	55099451	21	2
ENSMUSG00000024981	19	55253369	55296627	22	1
ENSMUSG00000024982	19	55298301	55316032	11	3
ENSMUSG00000024983	19	55316351	55626561	8	6
ENSMUSG00000024991	19	60761116	60790693	22	3
ENSMUSG00000024999	19	38788128	38819237	21	5
ENSMUSG00000025006	19	40295049	40402267	29	3
ENSMUSG00000025016	19	41210842	41264004	15	6
ENSMUSG00000025019	19	41482645	41562246	10	2
ENSMUSG00000025024	19	53379214	53390573	6	1
ENSMUSG00000025026	19	53140445	53247399	18	2
ENSMUSG00000025034	19	46501648	46516444	6	1
ENSMUSG00000025040	X	17556564	17572325	14	1
ENSMUSG00000025041	19	46886831	47015153	23	2
ENSMUSG00000025060	19	47579678	47645246	28	6
ENSMUSG00000025068	19	47854970	47864790	10	2
ENSMUSG00000025077	19	56529167	56548222	24	1
ENSMUSG00000025085	19	57032733	57314919	69	2
ENSMUSG00000025092	19	58795751	58860984	12	3
ENSMUSG00000025103	7	81792075	81829431	8	2
ENSMUSG00000025130	11	120560298	120573253	17	1
ENSMUSG00000025134	11	120592121	120598365	11	1
ENSMUSG00000025137	11	120610087	120617936	41	1
ENSMUSG00000025139	7	141874813	141918507	13	2
ENSMUSG00000025144	11	120710942	120713738	12	1
ENSMUSG00000025151	X	94535474	94542143	29	1
ENSMUSG00000025153	11	120805940	120824178	47	3
ENSMUSG00000025156	11	120784272	120789102	27	2
ENSMUSG00000025162	11	120961749	120991330	25	1
ENSMUSG00000025173	11	121327224	121354445	18	1
ENSMUSG00000025184	19	42518759	42592343	17	1
ENSMUSG00000025189	19	43440436	43497212	11	3
ENSMUSG00000025190	19	43499752	43524605	16	1
ENSMUSG00000025199	19	44073335	44107480	37	2
ENSMUSG00000025203 ENSMUSG00000093315	19	44293676	44306864	8	6
ENSMUSG00000025208	19	45005014	45006442	3	1
ENSMUSG00000025217	19	45363734	45533341	15	2
ENSMUSG00000025220	19	45750261	45783520	16	1
ENSMUSG00000025223	19	46032593	46045214	27	1
ENSMUSG00000025224	19	46152509	46286510	73	2
ENSMUSG00000025228	19	46376814	46395735	11	3
ENSMUSG00000025232	9	59539667	59565105	14	3
ENSMUSG00000025234	9	59388258	59486618	27	2
ENSMUSG00000025235	9	59321966	59353508	16	3
ENSMUSG00000025237	9	59617284	59650290	27	1
ENSMUSG00000025240	9	123529882	123592598	20	7
ENSMUSG00000025245	9	123694416	123717625	27	7
ENSMUSG00000025266	X	150983141	151017322	27	8
ENSMUSG00000025268	X	150806370	150814345	36	3
ENSMUSG00000025272	X	150645304	150657583	32	4
ENSMUSG00000025277	14	8002902	8056555	11	3
ENSMUSG00000025280	14	24448694	24487046	31	1
ENSMUSG00000025283	X	155213132	155216449	20	1
ENSMUSG00000025290	14	24490681	24496146	6	1
ENSMUSG00000025318	8	121729623	121794276	12	1
ENSMUSG00000025321	12	119158022	119238802	18	1
ENSMUSG00000025326	7	59228752	59306727	13	3
ENSMUSG00000025332	X	152233020	152274535	40	1
ENSMUSG00000025337	5	130245731	130255530	10	4
ENSMUSG00000025364	10	128557766	128565934	20	4
ENSMUSG00000025369	10	128459236	128490173	30	11
ENSMUSG00000025370	15	16778101	16857094	11	5
ENSMUSG00000025372	11	119942763	120006782	27	1
ENSMUSG00000025373	10	128411616	128441438	9	1
ENSMUSG00000025374	10	128401395	128411492	28	1
ENSMUSG00000025375	11	120007313	120047167	30	2
ENSMUSG00000025393	10	128083273	128090391	29	2
ENSMUSG00000025404	10	127380327	127499384	66	13
ENSMUSG00000025410	10	127266262	127281959	14	2
ENSMUSG00000025413	4	106662256	106678944	28	11
ENSMUSG00000025417	10	127197067	127211622	10	3
ENSMUSG00000025422	10	127078907	127093169	19	3
ENSMUSG00000025428	18	77773729	77782869	24	5
ENSMUSG00000025437	3	152346478	152393612	35	1
ENSMUSG00000025439	7	97696634	97718879	9	5
ENSMUSG00000025451	13	119428601	119458218	26	5
ENSMUSG00000025453	13	119335448	119408997	20	1
ENSMUSG00000025466	7	140096770	140102441	32	4
ENSMUSG00000025474	7	139995955	140036350	18	2
ENSMUSG00000025475	7	139834174	139878088	12	2
ENSMUSG00000025478	7	139086001	139102704	26	1
ENSMUSG00000025485	7	140856957	140863730	31	8
ENSMUSG00000025487	7	140881968	140898643	40	2
ENSMUSG00000025503	7	141392199	141402968	13	4
ENSMUSG00000025531	X	113040593	113185517	22	2
ENSMUSG00000025544	14	122107038	122159604	21	4
ENSMUSG00000025551	14	123977907	124677127	7	1
ENSMUSG00000025555	14	121035200	121283744	33	1
ENSMUSG00000025558	14	121542039	121797734	56	3
ENSMUSG00000025571	11	117654289	117763439	34	8
ENSMUSG00000025576	11	118489762	118911597	31	13
ENSMUSG00000025579	11	119267887	119285454	33	5
ENSMUSG00000025580	11	119288363	119300089	22	4
ENSMUSG00000025586	7	81347026	81455465	29	3
ENSMUSG00000025609	6	31398735	31516811	43	1
ENSMUSG00000025613	16	87483326	87495873	36	7
ENSMUSG00000025616	16	87454703	87483517	41	1
ENSMUSG00000025630	X	52988137	53021659	9	1
ENSMUSG00000025647	9	109038606	109057766	11	2
ENSMUSG00000025651	9	108936633	108949623	33	13
ENSMUSG00000025656	X	95048935	95196821	42	1
ENSMUSG00000025658	X	157821436	158043294	25	8
ENSMUSG00000025666	X	81070698	81097872	10	3
ENSMUSG00000025731	17	25875464	25886007	13	4
ENSMUSG00000025733 ENSMUSG00000093593 ENSMUSG00000025735 ENSMUSG00000073434	17	25834465	25861501	155	2
ENSMUSG00000025737	17	25823627	25828730	18	1
ENSMUSG00000025738	17	25809085	25821244	6	1
ENSMUSG00000025743	4	130792537	130826319	11	1
ENSMUSG00000025745	5	30118301	30155162	30	2
ENSMUSG00000025757	3	40744495	40796103	34	9
ENSMUSG00000025762	3	40950631	41040234	37	1
ENSMUSG00000025766	3	41742611	41803320	41	1
ENSMUSG00000025777	1	17145362	17164271	16	2
ENSMUSG00000025781	2	10056016	10080510	25	8
ENSMUSG00000025782	2	9914552	10048596	16	1
ENSMUSG00000025791	4	99929414	99987294	12	1
ENSMUSG00000025793	11	120467635	120483984	32	3
ENSMUSG00000025794	9	120571517	120574653	6	5
ENSMUSG00000025795	10	121410350	121476250	5	2
ENSMUSG00000025813	7	81600481	81706925	10	1
ENSMUSG00000025816	2	5870987	5895432	32	3
ENSMUSG00000025817	2	5845019	5871895	22	1
ENSMUSG00000025821	6	47877204	47908485	10	1
ENSMUSG00000025823 ENSMUSG00000076060	6	47796142	47813512	12	3
ENSMUSG00000025825	5	113772748	113778288	18	1
ENSMUSG00000025854	5	138754514	138810077	19	1
ENSMUSG00000025856	5	138976014	138997370	21	1
ENSMUSG00000025862	X	42149317	42277185	47	8
ENSMUSG00000025867	13	54371349	54383917	4	1
ENSMUSG00000025869	13	54584185	54590090	12	1
ENSMUSG00000025878	13	55027880	55100300	29	2
ENSMUSG00000025885	18	74440936	74771493	61	2
ENSMUSG00000025889	6	60731573	60829855	7	1
ENSMUSG00000025894	9	4294793	4309494	6	1
ENSMUSG00000025899	9	3335478	3387050	14	1
ENSMUSG00000025907	1	6206197	6276648	60	6
ENSMUSG00000025909	1	8361475	9299878	42	2
ENSMUSG00000025917	1	10024601	10038168	22	5
ENSMUSG00000025920	1	16228674	16520112	47	8
ENSMUSG00000025933	1	21218575	21230167	8	1
ENSMUSG00000025939	1	16540790	16619489	19	5
ENSMUSG00000025940	1	16665207	16678275	10	1
ENSMUSG00000025949	1	65186683	65278695	66	2
ENSMUSG00000025958	1	64532645	64604548	31	4
ENSMUSG00000025959	1	64029447	64122282	10	1
ENSMUSG00000025964	1	63445891	63596276	46	1
ENSMUSG00000025968	1	63143596	63176833	50	15
ENSMUSG00000025971	1	57406328	57417953	8	2
ENSMUSG00000025979	1	55131231	55154899	23	8
ENSMUSG00000025980	1	55077835	55088243	15	6
ENSMUSG00000025981	1	55052770	55072702	10	1
ENSMUSG00000025982	1	54985169	55027481	43	6
ENSMUSG00000025986	1	46807544	46892852	16	2
ENSMUSG00000025995	1	45795166	45823619	39	3
ENSMUSG00000026014	1	60482292	60567104	32	3
ENSMUSG00000026018	1	59982490	60043184	27	1
ENSMUSG00000026019	1	60069785	60098645	28	3
ENSMUSG00000026021	1	59586558	59670834	11	5
ENSMUSG00000026024 ENSMUSG00000079550	1	59120935	59237231	88	1
ENSMUSG00000026028	1	58900449	58973430	25	5
ENSMUSG00000026031	1	58711508	58758884	40	1
ENSMUSG00000026034	1	58410189	58424066	33	6
ENSMUSG00000026037	1	58462771	58505109	27	5
ENSMUSG00000026074	1	39900913	40026310	66	6
ENSMUSG00000026078	1	38985608	38997238	14	1
ENSMUSG00000026083	1	37998010	38055579	35	1
ENSMUSG00000026103	1	52163448	52233232	53	15
ENSMUSG00000026107	1	51465862	51478425	26	1
ENSMUSG00000026109	1	50900647	51187270	20	1
ENSMUSG00000026110	1	37439340	37541016	32	2
ENSMUSG00000026113	1	37299865	37410736	54	4
ENSMUSG00000026116	1	36792191	36943666	60	2
ENSMUSG00000026123	1	34849976	34879580	16	8
ENSMUSG00000026127	1	34439851	34449356	26	1
ENSMUSG00000026131 ENSMUSG00000103888 ENSMUSG00000103405	1	33908225	34308661	145	10
ENSMUSG00000026150	1	82724890	82752394	39	4
ENSMUSG00000026153	1	24011093	24100341	43	2
ENSMUSG00000026155	1	23844846	23922317	25	1
ENSMUSG00000026159 ENSMUSG00000093782	1	82839446	82901182	31	2
ENSMUSG00000026163	1	83254139	83408200	20	2
ENSMUSG00000026174	1	74506058	74530842	14	1
ENSMUSG00000026185	1	72857932	72874884	10	6
ENSMUSG00000026188	1	72284369	72303104	6	1
ENSMUSG00000026193	1	71585520	71653200	73	4
ENSMUSG00000026201	1	75210838	75215606	44	1
ENSMUSG00000026202	1	75214228	75219865	19	6
ENSMUSG00000026203	1	75236406	75245692	34	4
ENSMUSG00000026204	1	75247027	75264502	34	3
ENSMUSG00000026207	1	75375297	75432320	73	7
ENSMUSG00000026219	1	84721189	84840516	80	9
ENSMUSG00000026223	1	85894281	85908675	10	4
ENSMUSG00000026234 ENSMUSG00000064837 ENSMUSG00000064696	1	86344719	86359400	31	5
ENSMUSG00000026235	1	77367185	77515088	28	5
ENSMUSG00000026238	1	86526726	86530712	16	5
ENSMUSG00000026240	1	86582904	86609375	20	1
ENSMUSG00000026245	1	78417975	78488897	31	1
ENSMUSG00000026248	1	79776018	79781445	6	3
ENSMUSG00000026249	1	79794197	79861180	18	1
ENSMUSG00000026254	1	87213914	87240488	19	2
ENSMUSG00000026260	1	92439010	92473860	25	1
ENSMUSG00000026275	1	93342854	93373489	15	1
ENSMUSG00000026276	1	93478964	93510260	43	2
ENSMUSG00000026277	1	93619751	93658659	24	2
ENSMUSG00000026279	1	93701935	93754864	18	1
ENSMUSG00000026281	1	93792576	93801934	11	1
ENSMUSG00000026289	1	87755870	87792428	40	1
ENSMUSG00000026305	1	90998737	91128944	49	3
ENSMUSG00000026313	1	91928779	92180341	46	1
ENSMUSG00000026339	1	121431049	121506460	36	1
ENSMUSG00000026341	1	125392905	125435727	34	5
ENSMUSG00000026344	1	125867622	125913101	11	2
ENSMUSG00000026349	1	127774164	127808061	19	4
ENSMUSG00000026353	1	128243964	128279378	20	9
ENSMUSG00000026356	1	128363707	128417368	20	5
ENSMUSG00000026360	1	143999338	144004161	12	1
ENSMUSG00000026361	1	143598800	143702893	25	1
ENSMUSG00000026365	1	140084708	140183764	36	1
ENSMUSG00000026374	1	118294778	118311739	17	2
ENSMUSG00000026384	1	119652467	119837613	47	7
ENSMUSG00000026393	1	138482875	138620141	16	3
ENSMUSG00000026399	1	130439027	130462744	18	1
ENSMUSG00000026411	1	136008150	136035342	15	7
ENSMUSG00000026414	1	135836354	135852260	45	1
ENSMUSG00000026425	1	131285251	131527352	44	2
ENSMUSG00000026426	1	135146824	135156269	13	2
ENSMUSG00000026434	1	131910534	131936321	12	4
ENSMUSG00000026436 ENSMUSG00000026435 ENSMUSG00000100037	1	131962954	132032612	33	3
ENSMUSG00000026437	1	132112237	132139684	27	1
ENSMUSG00000026442	1	132564690	132741797	51	2
ENSMUSG00000026484	1	151458004	151500955	21	2
ENSMUSG00000026490	1	179960472	180165603	74	18
ENSMUSG00000026491 ENSMUSG00000087236	1	179695297	179803680	80	14
ENSMUSG00000026504	1	176814660	177020437	24	1
ENSMUSG00000026509	1	182467260	182517608	33	3
ENSMUSG00000026514	1	181352628	181460641	11	1
ENSMUSG00000026526	1	175600374	175625635	20	1
ENSMUSG00000026527	1	175059087	175492500	34	1
ENSMUSG00000026553	1	172082529	172122330	56	1
ENSMUSG00000026554	1	172148084	172197005	39	8
ENSMUSG00000026558	1	167222883	167285320	19	1
ENSMUSG00000026571	1	165328698	165460475	31	3
ENSMUSG00000026576	1	164437109	164458355	11	2
ENSMUSG00000026578	1	164275585	164287847	6	3
ENSMUSG00000026585	1	163779583	163917109	21	4
ENSMUSG00000026594	1	156804166	156939626	50	5
ENSMUSG00000026600	1	156424525	156474331	32	3
ENSMUSG00000026603	1	189880492	189922363	19	1
ENSMUSG00000026608	1	188971095	189007841	39	6
ENSMUSG00000026615	1	185363044	185428360	49	4
ENSMUSG00000026618	1	185284726	185329396	32	2
ENSMUSG00000026620	1	184896789	184999570	21	2
ENSMUSG00000026623	1	191717834	191784255	17	2
ENSMUSG00000026640	1	194618218	194816869	41	1
ENSMUSG00000026657	2	4017717	4614043	62	5
ENSMUSG00000026659	1	170873498	170885540	19	1
ENSMUSG00000026663	1	170704674	170867771	18	1
ENSMUSG00000026667	1	170193420	170215397	9	1
ENSMUSG00000026678	1	169655501	169695813	7	1
ENSMUSG00000026696	1	162570515	162599084	23	5
ENSMUSG00000026705	1	161088375	161131511	26	1
ENSMUSG00000026709	1	161040601	161070658	32	2
ENSMUSG00000026718	2	14074098	14149634	31	5
ENSMUSG00000026721	1	160219174	160793211	58	1
ENSMUSG00000026727	2	13076821	13271415	29	1
ENSMUSG00000026728	2	13573927	13582826	23	6
ENSMUSG00000026737	2	18842255	18998126	14	1
ENSMUSG00000026739	2	18677018	18686629	22	2
ENSMUSG00000026740	2	18195654	18392830	33	1
ENSMUSG00000026743	2	18055237	18212388	44	8
ENSMUSG00000026750	2	38588036	38644087	10	1
ENSMUSG00000026753	2	39194354	39226451	9	1
ENSMUSG00000026754	2	39016261	39065541	46	4
ENSMUSG00000026755	2	39008076	39015877	11	9
ENSMUSG00000026764	2	49619298	49774778	37	10
ENSMUSG00000026767	2	12347263	12419470	51	2
ENSMUSG00000026771	2	23506220	23572106	24	1
ENSMUSG00000026775	2	23156369	23199260	29	5
ENSMUSG00000026781	2	23068168	23114510	23	1
ENSMUSG00000026782	1	60409619	60481158	36	5
ENSMUSG00000026787	2	22622205	22693874	18	4
ENSMUSG00000026790	2	29889221	29931746	68	7
ENSMUSG00000026797	2	32787602	32847239	27	4
ENSMUSG00000026798	2	29787493	29797935	20	1
ENSMUSG00000026812	2	28641228	28691167	48	2
ENSMUSG00000026817	2	32621758	32635058	19	1
ENSMUSG00000026824	2	55435970	55598145	8	2
ENSMUSG00000026825	2	32308471	32353329	50	10
ENSMUSG00000026826	2	57106830	57124003	16	1
ENSMUSG00000026827	2	57237635	57370719	28	3
ENSMUSG00000026830	2	58045113	58052864	3	2
ENSMUSG00000026833	2	28192992	28230736	10	4
ENSMUSG00000026836	2	58388644	58567157	23	1
ENSMUSG00000026843	2	31572651	31617526	45	1
ENSMUSG00000026851	2	30972177	30982201	13	1
ENSMUSG00000026853	2	30400471	30415813	45	1
ENSMUSG00000026860	2	30344809	30359337	39	4
ENSMUSG00000026864	2	34771970	34777547	22	9
ENSMUSG00000026867	2	34676184	34755232	59	6
ENSMUSG00000026879	2	35279663	35307892	21	2
ENSMUSG00000026883	2	35558266	35730994	41	3
ENSMUSG00000026885	2	35751241	35979913	25	1
ENSMUSG00000026889	2	36116079	36136773	13	3
ENSMUSG00000026904	2	62046462	62326730	37	8
ENSMUSG00000026914	2	61711694	61800376	27	9
ENSMUSG00000026915	2	37483228	37703859	33	2
ENSMUSG00000026918 ENSMUSG00000098812	2	27445579	27507662	37	6
ENSMUSG00000026926	2	26389339	26397122	23	1
ENSMUSG00000026927	2	26382802	26389316	33	3
ENSMUSG00000026933	2	25926838	25983282	42	7
ENSMUSG00000026944	2	25428703	25448540	65	8
ENSMUSG00000026959	2	25291181	25319187	42	5
ENSMUSG00000026970	2	60750193	60963192	29	1
ENSMUSG00000026974	2	24949792	24962075	8	1
ENSMUSG00000026986	2	24002910	24049394	11	1
ENSMUSG00000026987	2	59899363	60209839	70	1
ENSMUSG00000026991	2	59160850	59355208	50	11
ENSMUSG00000027002	2	80500512	80581380	41	4
ENSMUSG00000027006	2	80315466	80354043	31	4
ENSMUSG00000027010	2	71271063	71367749	28	2
ENSMUSG00000027011	2	78868124	78921293	19	1
ENSMUSG00000027012	2	71211706	71263303	40	4
ENSMUSG00000027018	2	71388958	71441622	17	4
ENSMUSG00000027030	2	68210445	68472268	31	2
ENSMUSG00000027035	2	68861441	69114282	23	1
ENSMUSG00000027067	2	85037234	85047109	33	6
ENSMUSG00000027080	2	84678402	84688215	8	3
ENSMUSG00000027082	2	84432855	84476775	26	1
ENSMUSG00000027087	2	83724397	83806916	46	3
ENSMUSG00000027091	2	83644435	83664622	21	2
ENSMUSG00000027099	2	74825803	74878431	14	1
ENSMUSG00000027104 ENSMUSG00000099302	2	73816509	73892639	47	3
ENSMUSG00000027108	2	73092801	73218924	21	4
ENSMUSG00000027122	2	106962527	106974424	11	1
ENSMUSG00000027162	2	109890853	109901003	7	4
ENSMUSG00000027176	2	104590523	104665429	33	2
ENSMUSG00000027180	2	104027721	104063240	22	8
ENSMUSG00000027184	2	103762941	103797649	52	12
ENSMUSG00000027185	2	103721256	103761270	53	3
ENSMUSG00000027188	2	102550012	102643041	18	1
ENSMUSG00000027189	2	102300119	102407828	9	1
ENSMUSG00000027193	2	94411682	94438136	22	3
ENSMUSG00000027194	2	94300767	94406689	33	5
ENSMUSG00000027198	2	93661028	93822568	38	1
ENSMUSG00000027199	2	122594467	122611303	14	3
ENSMUSG00000027200	2	124089969	124667770	40	1
ENSMUSG00000027201	2	125084628	125123661	34	1
ENSMUSG00000027210	2	115863064	116065839	45	2
ENSMUSG00000027215	2	93419111	93463140	31	2
ENSMUSG00000027221	2	92599707	92615250	3	3
ENSMUSG00000027223	2	92383676	92401263	16	1
ENSMUSG00000027244	2	91674618	91710576	29	1
ENSMUSG00000027245 ENSMUSG00000074884	2	121449195	121458672	35	2
ENSMUSG00000027248	2	121413775	121438687	19	2
ENSMUSG00000027253	2	91457511	91513779	46	3
ENSMUSG00000027254	2	121289600	121310832	13	3
ENSMUSG00000027255	2	91264974	91276931	28	7
ENSMUSG00000027272	2	120860269	120970715	60	6
ENSMUSG00000027273	2	136713453	136782428	13	1
ENSMUSG00000027286	2	120604238	120609520	21	2
ENSMUSG00000027288	2	120506820	120563843	45	6
ENSMUSG00000027291	2	120316461	120353137	48	4
ENSMUSG00000027298	2	119797733	119818104	36	5
ENSMUSG00000027304	2	119675068	119735407	26	2
ENSMUSG00000027312	2	130906495	131030333	37	3
ENSMUSG00000027339	2	131989415	132030258	23	3
ENSMUSG00000027340	2	132052496	132145108	29	6
ENSMUSG00000027347	2	117279993	117343001	25	1
ENSMUSG00000027349	2	117249739	117271540	13	2
ENSMUSG00000027350	2	132781278	132795079	5	1
ENSMUSG00000027351	2	117121374	117182279	9	3
ENSMUSG00000027363	2	126707328	126759297	26	4
ENSMUSG00000027365	2	126791565	126876230	64	1
ENSMUSG00000027366	2	126890391	126933235	21	1
ENSMUSG00000027374	2	127587222	127606829	24	4
ENSMUSG00000027375	2	127633226	127656695	6	3
ENSMUSG00000027397	2	129198764	129211616	29	6
ENSMUSG00000027405 ENSMUSG00000065289 ENSMUSG00000093645 ENSMUSG00000065287 ENSMUSG00000065272	2	130274430	130279313	68	15
ENSMUSG00000027406	2	130279309	130284547	21	4
ENSMUSG00000027411	2	130424339	130444269	42	1
ENSMUSG00000027419	2	143546156	143816285	14	5
ENSMUSG00000027425 ENSMUSG00000098387	2	144368983	144407676	37	2
ENSMUSG00000027429	2	144556229	144590749	35	2
ENSMUSG00000027430	2	144599897	144768758	15	6
ENSMUSG00000027433	2	147012996	147078000	36	4
ENSMUSG00000027438	2	148693985	148732467	15	2
ENSMUSG00000027439	2	148681023	148692949	12	1
ENSMUSG00000027447	2	148871722	148875692	8	1
ENSMUSG00000027455	2	151494182	151511414	30	2
ENSMUSG00000027472	2	153008890	153015427	21	1
ENSMUSG00000027479	2	153741274	153773310	11	4
ENSMUSG00000027500	3	8509360	8561606	12	2
ENSMUSG00000027502	2	172440556	172469908	12	3
ENSMUSG00000027506	3	8925593	9004723	29	2
ENSMUSG00000027509	2	173000117	173015739	21	1
ENSMUSG00000027522	2	174076308	174099771	22	9
ENSMUSG00000027523	2	174284320	174346744	46	3
ENSMUSG00000027525	2	178118975	178338492	24	9
ENSMUSG00000027546	2	168634438	168742409	48	1
ENSMUSG00000027560	2	170731807	170879769	8	1
ENSMUSG00000027562	3	14886273	14900770	12	6
ENSMUSG00000027566	2	180036373	180042433	22	11
ENSMUSG00000027575	2	180967225	180982526	47	4
ENSMUSG00000027577	2	181018380	181043546	14	2
ENSMUSG00000027581	2	181306459	181314500	5	2
ENSMUSG00000027584	2	181715016	181720985	26	5
ENSMUSG00000027598	2	155133509	155226855	36	1
ENSMUSG00000027599	3	19131402	19163065	7	2
ENSMUSG00000027613	2	155819832	155826925	16	2
ENSMUSG00000027618 ENSMUSG00000074643 ENSMUSG00000098950 ENSMUSG00000089824	2	156071842	156144186	101	10
ENSMUSG00000027620	2	156147239	156180238	69	18
ENSMUSG00000027624	2	156420909	156543214	44	9
ENSMUSG00000027634	2	156927345	156992056	40	6
ENSMUSG00000027642	2	157279017	157326319	38	4
ENSMUSG00000027652	2	158409848	158499253	51	1
ENSMUSG00000027660	3	31095058	31122577	21	2
ENSMUSG00000027665	3	32397671	32468486	27	1
ENSMUSG00000027668	3	32529465	32579239	38	1
ENSMUSG00000027669	3	32580332	32616585	26	1
ENSMUSG00000027673	3	32736990	32751566	23	4
ENSMUSG00000027674	3	32949408	33143247	35	8
ENSMUSG00000027676	3	33812361	33844310	20	3
ENSMUSG00000027677 ENSMUSG00000104357	3	33800195	33816634	16	3
ENSMUSG00000027680	3	34020079	34069342	19	1
ENSMUSG00000027692	3	28263214	28675858	55	9
ENSMUSG00000027698	3	27182965	27284608	13	4
ENSMUSG00000027706	3	30792875	30821263	14	11
ENSMUSG00000027709	3	35959311	36000678	19	2
ENSMUSG00000027712	3	36448926	36475887	13	1
ENSMUSG00000027714	3	36552606	36565729	31	3
ENSMUSG00000027737	3	49892526	50443614	21	1
ENSMUSG00000027746	3	53855212	53863830	14	3
ENSMUSG00000027751 ENSMUSG00000095832	3	54692823	54728762	30	3
ENSMUSG00000027763	3	60472830	60629750	60	6
ENSMUSG00000027770	3	62468013	62507004	34	4
ENSMUSG00000027774	3	67430096	67476529	22	1
ENSMUSG00000027777 ENSMUSG00000051777 ENSMUSG00000102422	3	67892220	68626481	25	1
ENSMUSG00000027782	3	69067149	69127113	21	5
ENSMUSG00000027787	3	69721985	69756373	28	5
ENSMUSG00000027797	3	55242526	55539064	21	3
ENSMUSG00000027799	3	55625205	56183701	58	8
ENSMUSG00000027804	3	79591342	79603650	23	5
ENSMUSG00000027806	3	58415689	58466787	4	2
ENSMUSG00000027810	3	58525821	58557501	25	5
ENSMUSG00000027823	3	63976106	64022579	16	2
ENSMUSG00000027829	3	65946151	65958249	45	1
ENSMUSG00000027834	3	75557547	75643495	16	5
ENSMUSG00000027835	3	75516490	75556856	20	1
ENSMUSG00000027852	3	103058339	103067914	14	1
ENSMUSG00000027865	3	100162381	100206981	19	1
ENSMUSG00000027879	3	97901190	97923276	12	2
ENSMUSG00000027881	3	108902667	108911727	19	1
ENSMUSG00000027882	3	108793176	108840526	30	2
ENSMUSG00000027889	3	108074062	108086651	40	1
ENSMUSG00000027893	3	107663118	107696560	34	4
ENSMUSG00000027894	3	107467543	107518018	37	3
ENSMUSG00000027933	3	90391380	90433636	32	3
ENSMUSG00000027937	3	90231597	90235838	13	1
ENSMUSG00000027942	3	90051636	90068347	32	1
ENSMUSG00000027950	3	89753448	89764632	6	2
ENSMUSG00000027951	3	89715022	89753446	24	2
ENSMUSG00000027952	3	89459118	89469013	11	4
ENSMUSG00000027962	3	116110020	116129688	9	1
ENSMUSG00000027963	3	116007462	116029016	16	1
ENSMUSG00000027965	3	114904078	115125722	10	2
ENSMUSG00000027977	3	123526166	123690852	28	1
ENSMUSG00000027993	3	84160439	84305446	48	5
ENSMUSG00000027998	3	83055522	83072355	26	4
ENSMUSG00000028005	3	82032004	82074711	22	1
ENSMUSG00000028013	3	133310110	133378235	25	1
ENSMUSG00000028020	3	80843599	80913660	21	10
ENSMUSG00000028029	3	132660498	132683879	7	3
ENSMUSG00000028033	1	21398403	21961942	24	1
ENSMUSG00000028034	3	152210458	152236830	26	6
ENSMUSG00000028035	3	152178511	152210279	15	1
ENSMUSG00000028039	3	89313899	89322965	7	1
ENSMUSG00000028041	3	89338542	89349996	54	3
ENSMUSG00000028048	3	89202928	89208681	14	1
ENSMUSG00000028049	3	89177473	89182765	24	1
ENSMUSG00000028053	3	88950622	89079375	32	4
ENSMUSG00000028057	3	88716838	88731049	25	17
ENSMUSG00000028063	3	88481148	88509956	27	1
ENSMUSG00000028078	3	86786151	86920852	45	1
ENSMUSG00000028082	3	85971109	86130526	35	1
ENSMUSG00000028085	3	85574119	85655622	21	1
ENSMUSG00000028086	3	84815268	84979198	23	2
ENSMUSG00000028098	3	96727611	96791155	9	1
ENSMUSG00000028106	3	95759873	95818953	11	2
ENSMUSG00000028114	3	123364645	123385990	20	2
ENSMUSG00000028128	3	121723537	121735052	6	3
ENSMUSG00000028132	3	121201761	121283098	23	1
ENSMUSG00000028134	3	119718742	119783388	14	2
ENSMUSG00000028137	3	94478831	94492193	13	3
ENSMUSG00000028140	3	94443336	94448708	7	2
ENSMUSG00000028145	3	94310132	94332532	6	1
ENSMUSG00000028149	3	138925906	139075199	15	3
ENSMUSG00000028152	3	138742195	138904433	26	3
ENSMUSG00000028156	3	138526191	138557599	8	2
ENSMUSG00000028161	3	136670124	136937727	25	9
ENSMUSG00000028173	3	159839737	159935833	12	2
ENSMUSG00000028176	3	158084439	158562221	28	1
ENSMUSG00000028180	3	157534160	157548390	24	3
ENSMUSG00000028187	3	146506348	146521423	9	1
ENSMUSG00000028189	3	146450470	146465849	9	1
ENSMUSG00000028207	4	9448069	9669344	45	3
ENSMUSG00000028218	4	12153409	12172015	27	4
ENSMUSG00000028221	4	14864076	14915176	7	1
ENSMUSG00000028222	4	15881264	15908064	16	2
ENSMUSG00000028232	4	3549041	3574853	20	1
ENSMUSG00000028233	4	3574875	3616619	22	3
ENSMUSG00000028243	4	6191098	6221688	8	4
ENSMUSG00000028247	4	21879673	21912162	9	1
ENSMUSG00000028248	4	21847583	21876475	44	6
ENSMUSG00000028249	4	6365650	6408423	25	9
ENSMUSG00000028252	4	21727701	21759922	26	2
ENSMUSG00000028261	4	24898083	24905001	10	4
ENSMUSG00000028266	3	144188530	144205220	15	6
ENSMUSG00000028270	3	142620602	142638008	14	1
ENSMUSG00000028274	4	33310311	33502614	26	6
ENSMUSG00000028277	4	33031416	33052363	10	1
ENSMUSG00000028282	4	32615451	32653265	19	8
ENSMUSG00000028289	4	28813131	28967499	32	5
ENSMUSG00000028292	4	34614957	34660167	34	1
ENSMUSG00000028300	4	35191285	35226175	23	1
ENSMUSG00000028309	4	49632006	49656887	39	3
ENSMUSG00000028312	4	52439243	52488260	32	1
ENSMUSG00000028330	4	46138613	46172403	28	4
ENSMUSG00000028334	4	46489248	46503632	13	1
ENSMUSG00000028341	4	48045153	48086447	15	3
ENSMUSG00000028347	4	48585174	48663131	17	3
ENSMUSG00000028351	4	68761514	68954397	11	6
ENSMUSG00000028354	1	174501825	174822729	27	4
ENSMUSG00000028367	4	57943373	57956411	5	3
ENSMUSG00000028382	4	59471868	59549364	42	1
ENSMUSG00000028383	4	59581563	59618689	16	1
ENSMUSG00000028399	4	75941238	78211961	82	5
ENSMUSG00000028402	4	81278500	81442815	68	4
ENSMUSG00000028403	4	82798738	82859958	20	2
ENSMUSG00000028409	4	40736542	40757923	18	4
ENSMUSG00000028416	4	40936398	40948294	11	4
ENSMUSG00000028419	4	40948407	40965303	8	3
ENSMUSG00000028423	4	40970906	41025993	36	2
ENSMUSG00000028426	4	55350043	55392237	17	2
ENSMUSG00000028430	4	41114427	41124455	34	3
ENSMUSG00000028431	4	56749680	56802331	47	2
ENSMUSG00000028439	4	41517691	41569538	13	2
ENSMUSG00000028452	4	42979963	43000507	27	2
ENSMUSG00000028465	4	43531519	43562691	75	2
ENSMUSG00000028466	4	43562332	43567060	24	1
ENSMUSG00000028467	4	43566928	43578873	32	1
ENSMUSG00000028478	4	44004452	44032846	14	6
ENSMUSG00000028479	4	44034075	44084177	43	1
ENSMUSG00000028483	4	83417724	83467676	28	4
ENSMUSG00000028484	4	83455680	83486459	28	7
ENSMUSG00000028488	4	85205126	85639195	20	1
ENSMUSG00000028495	4	86854660	86857412	13	2
ENSMUSG00000028496	4	87769925	88033364	24	1
ENSMUSG00000028514	4	106316213	106441322	77	4
ENSMUSG00000028518	4	105029874	105109890	9	1
ENSMUSG00000028519	4	103619359	104744844	32	2
ENSMUSG00000028522	4	103114390	103165754	45	7
ENSMUSG00000028524	4	102741297	102973628	55	12
ENSMUSG00000028525	4	102087543	102607259	42	1
ENSMUSG00000028527	4	101419277	101466995	19	2
ENSMUSG00000028528	4	101496648	101642799	33	13
ENSMUSG00000028530	4	101152367	101265282	43	5
ENSMUSG00000028532	4	100776675	101029220	32	1
ENSMUSG00000028541 ENSMUSG00000091237 ENSMUSG00000078588	4	117835299	117883487	56	1
ENSMUSG00000028546	4	110203722	110351909	23	7
ENSMUSG00000028552	4	109280268	109387817	46	3
ENSMUSG00000028559	4	109061145	109202272	57	8
ENSMUSG00000028560	4	98923810	98935543	15	1
ENSMUSG00000028565	4	97772734	98118874	21	2
ENSMUSG00000028567	4	108834601	108862127	11	1
ENSMUSG00000028568	4	108814295	108833614	18	1
ENSMUSG00000028572	4	95967240	96025413	45	3
ENSMUSG00000028576	4	94614491	94693229	22	2
ENSMUSG00000028577	4	94567514	94603244	23	3
ENSMUSG00000028580	4	130663321	130781564	35	9
ENSMUSG00000028603	4	108043839	108144998	34	3
ENSMUSG00000028608	4	107889813	107899384	37	2
[truncated: 2,683 more rows]

## Sheet: CONstim_GFstim
geneID	chr	start	end	total_exons	exon_changes
ENSMUSG00000000078	13	5861489	5870393	4	1
ENSMUSG00000000194	2	31152316	31218775	39	1
ENSMUSG00000000223	X	134404551	134456573	37	1
ENSMUSG00000000308	2	121357714	121363737	30	2
ENSMUSG00000000416	6	18366478	18514869	42	2
ENSMUSG00000000631	11	77763246	77865980	90	3
ENSMUSG00000000804	11	84984442	85140161	50	2
ENSMUSG00000001119	10	76708792	76726168	38	1
ENSMUSG00000001150	10	76468971	76515856	29	2
ENSMUSG00000001156	6	86647044	86669159	6	1
ENSMUSG00000001211	10	78269178	78352489	30	1
ENSMUSG00000001260	5	70751047	70842617	9	1
ENSMUSG00000001289 ENSMUSG00000001285	15	102326116	102338139	47	2
ENSMUSG00000001376	6	3498382	3603319	49	3
ENSMUSG00000001472	8	123373824	123404173	20	5
ENSMUSG00000001525	17	35833921	35838306	12	1
ENSMUSG00000001729	12	112653821	112674884	32	1
ENSMUSG00000001773	7	86719352	86775864	20	1
ENSMUSG00000001774	9	18292267	18314000	11	1
ENSMUSG00000001909	8	84686307	84699808	79	2
ENSMUSG00000001911	8	84699876	84800344	29	2
ENSMUSG00000002010	X	73778963	73786897	31	2
ENSMUSG00000002028	9	44803355	44881296	45	2
ENSMUSG00000002031	9	44767908	44792714	41	2
ENSMUSG00000002342	8	70172356	70183681	39	1
ENSMUSG00000002477	18	10617796	10628230	4	2
ENSMUSG00000002524	15	76070184	76080946	12	1
ENSMUSG00000002580	11	98437708	98438991	4	1
ENSMUSG00000002731	2	76629898	76648015	9	1
ENSMUSG00000002812	11	60714123	60727263	36	1
ENSMUSG00000002881	1	52457294	52500679	18	1
ENSMUSG00000002900	12	31265234	31329644	52	1
ENSMUSG00000002948 ENSMUSG00000089736	8	4238740	4251423	37	1
ENSMUSG00000002949	8	4259731	4275913	32	2
ENSMUSG00000002996	12	31926254	31950535	29	1
ENSMUSG00000003039	8	72219730	72223764	4	4
ENSMUSG00000003161	5	8046078	8069379	19	3
ENSMUSG00000003226	10	58446852	58494155	29	1
ENSMUSG00000003279	17	69969073	70821413	46	1
ENSMUSG00000003308	9	21229730	21239332	17	1
ENSMUSG00000003316	8	111154421	111259216	34	2
ENSMUSG00000003352	15	98632220	98644530	14	3
ENSMUSG00000003363	7	27532000	27553218	30	1
ENSMUSG00000003402	9	22003035	22014219	19	1
ENSMUSG00000003411	4	108879063	108943324	12	1
ENSMUSG00000003435	7	28314898	28338719	30	3
ENSMUSG00000003437	7	28392951	28399388	35	2
ENSMUSG00000003469	14	70457476	70468832	7	1
ENSMUSG00000003546	17	46630631	46645144	16	1
ENSMUSG00000003660	2	127208386	127240451	56	3
ENSMUSG00000003863	7	45339126	45367019	46	1
ENSMUSG00000003868	7	45421852	45438096	22	4
ENSMUSG00000003948	11	90187684	90278589	16	3
ENSMUSG00000004032	3	107895821	107898686	19	3
ENSMUSG00000004056	7	27591552	27640826	45	1
ENSMUSG00000004099	9	20907206	20959888	42	2
ENSMUSG00000004110	1	154390731	154884501	62	1
ENSMUSG00000004151	12	38779380	38868215	40	1
ENSMUSG00000004187	15	76660641	76668196	18	1
ENSMUSG00000004207	10	60277627	60302597	21	1
ENSMUSG00000004264 ENSMUSG00000088835	6	124712336	124716950	26	2
ENSMUSG00000004285	6	29467718	29470512	4	1
ENSMUSG00000004360	10	29211643	29230779	6	2
ENSMUSG00000004394	11	6270369	6274870	10	2
ENSMUSG00000004530	5	113842436	113908758	30	1
ENSMUSG00000004567	8	3500457	3515232	28	1
ENSMUSG00000004633	6	54039554	54301810	29	1
ENSMUSG00000004771	9	64715299	64737758	24	2
ENSMUSG00000004788	12	85219481	85226628	22	1
ENSMUSG00000004849	5	137034993	137046135	13	2
ENSMUSG00000004895	3	87858903	87885608	7	2
ENSMUSG00000005045	4	152338651	152390194	49	1
ENSMUSG00000005102	2	118388618	118475234	50	2
ENSMUSG00000005161	8	84969587	84974834	19	1
ENSMUSG00000005262	16	18811779	18835261	34	1
ENSMUSG00000005299	5	33739673	33782817	21	1
ENSMUSG00000005360	15	8634124	8710764	26	3
ENSMUSG00000005417	11	59661305	59780860	38	3
ENSMUSG00000005506	2	90940382	91019497	33	1
ENSMUSG00000005533	7	67952859	68226780	21	1
ENSMUSG00000005583	13	83504034	83667079	17	1
ENSMUSG00000005625	3	95032694	95042614	30	1
ENSMUSG00000005672	5	75574916	75656722	30	2
ENSMUSG00000005687	3	103171655	103179166	21	3
ENSMUSG00000005802	2	122681233	122702663	9	1
ENSMUSG00000005873	18	34344889	34373415	5	3
ENSMUSG00000005881	2	156008045	156018279	34	3
ENSMUSG00000005882	2	155846894	155930310	47	1
ENSMUSG00000005893	6	92091390	92173057	25	1
ENSMUSG00000006005	1	150392838	150449935	81	1
ENSMUSG00000006050	18	36666681	36679366	30	2
ENSMUSG00000006057	11	96068852	96075670	12	3
ENSMUSG00000006288	14	50765415	50785518	10	3
ENSMUSG00000006423	X	36823737	36874111	21	1
ENSMUSG00000006456 ENSMUSG00000096370 ENSMUSG00000094936	19	4742913	4811634	38	5
ENSMUSG00000006527	14	30714849	30822713	32	1
ENSMUSG00000006575	11	102393403	102402555	27	2
ENSMUSG00000006599	7	46796103	46823800	24	1
ENSMUSG00000006676	9	108490602	108502337	65	1
ENSMUSG00000006800	2	166073089	166155663	35	1
ENSMUSG00000006920	11	101191115	101226463	38	4
ENSMUSG00000006930	11	100347327	100356128	22	3
ENSMUSG00000006932	9	120929216	120960507	50	4
ENSMUSG00000006998	16	20651652	20663414	34	3
ENSMUSG00000007097	1	172271709	172298064	28	1
ENSMUSG00000007564	17	20945311	20965916	31	1
ENSMUSG00000007653	11	42419757	42629028	19	1
ENSMUSG00000007656	9	75037614	75060313	27	2
ENSMUSG00000007682	12	90724554	90738438	2	2
ENSMUSG00000007721	8	70868227	70873490	5	4
ENSMUSG00000007739	11	22990519	23003780	33	2
ENSMUSG00000007891 ENSMUSG00000045777	7	142325837	142388038	30	1
ENSMUSG00000008153	6	124430759	124464794	30	5
ENSMUSG00000008435 ENSMUSG00000077965	7	4424770	4445649	23	1
ENSMUSG00000008489	4	91250763	91400785	36	1
ENSMUSG00000008575	4	82290173	82705750	29	1
ENSMUSG00000008658	16	6809222	7412479	16	1
ENSMUSG00000008690	15	89355719	89372826	49	9
ENSMUSG00000008892	8	22577075	22593813	10	1
ENSMUSG00000009079	11	5069689	5099266	42	1
ENSMUSG00000009207	2	74520291	74579435	39	6
ENSMUSG00000009418 ENSMUSG00000090399	1	135434580	135688105	52	2
ENSMUSG00000009470	13	98839019	98926384	31	1
ENSMUSG00000009535	18	68300355	68324852	27	1
ENSMUSG00000009640	4	117674681	117682273	24	1
ENSMUSG00000009681	10	75060896	75184923	23	1
ENSMUSG00000009894	11	59407134	59451186	23	1
ENSMUSG00000010025	11	61223417	61267464	22	2
ENSMUSG00000010097	19	8757073	8772475	49	2
ENSMUSG00000010453	1	36335730	36369181	40	1
ENSMUSG00000010608	12	83631236	83683123	60	4
ENSMUSG00000010663	19	10182888	10196870	12	1
ENSMUSG00000010803	11	42130939	42182930	17	2
ENSMUSG00000011427	7	29816072	29832042	6	1
ENSMUSG00000011589	17	55986511	55996881	13	2
ENSMUSG00000011831	5	107744795	107875107	46	1
ENSMUSG00000011877	11	77493562	77507786	32	1
ENSMUSG00000012405	14	18267823	18271391	13	1
ENSMUSG00000012535	6	29540827	29609887	45	2
ENSMUSG00000013622	5	31048312	31054633	26	1
ENSMUSG00000013662	19	32672563	32712298	10	1
ENSMUSG00000013698	1	172196728	172206804	12	2
ENSMUSG00000014195	11	100582818	100620168	33	3
ENSMUSG00000014226	1	160202367	160212875	11	2
ENSMUSG00000014232 ENSMUSG00000005982 ENSMUSG00000093575	16	3872375	3941147	58	1
ENSMUSG00000014313	15	35925886	35938246	15	2
ENSMUSG00000014353	2	128818118	128854261	34	1
ENSMUSG00000014355	2	128610104	128687391	70	1
ENSMUSG00000014601	3	107612532	107631710	21	1
ENSMUSG00000014602	1	93015464	93101951	75	2
ENSMUSG00000014867	2	26920040	26933928	11	2
ENSMUSG00000014873	2	26916367	26920183	21	1
ENSMUSG00000014959	2	70661576	70712636	20	3
ENSMUSG00000015090	2	25466709	25470046	16	2
ENSMUSG00000015094 ENSMUSG00000015085	2	25395874	25409494	58	1
ENSMUSG00000015120	17	25261916	25274622	35	2
ENSMUSG00000015165	7	28808541	28822266	40	3
ENSMUSG00000015357	9	65294260	65330658	19	1
ENSMUSG00000015461	17	34647146	34655074	27	3
ENSMUSG00000015488	2	27009926	27021089	21	1
ENSMUSG00000015501	10	13966075	14151374	23	1
ENSMUSG00000015672	13	14610301	14613037	3	1
ENSMUSG00000015733	6	17636234	17666972	26	1
ENSMUSG00000015747	3	95999832	96058466	19	3
ENSMUSG00000015748	3	95830124	95855885	36	1
ENSMUSG00000015766	6	137477245	137654876	50	1
ENSMUSG00000015837	11	50199366	50210827	24	1
ENSMUSG00000015971	14	29978337	29993221	13	1
ENSMUSG00000015981	7	139103638	139213307	13	4
ENSMUSG00000016018	13	112867780	112927380	27	3
ENSMUSG00000016179	1	193346346	193370298	20	1
ENSMUSG00000016253	2	174415804	174427502	29	1
ENSMUSG00000016346	2	181075579	181135291	48	2
ENSMUSG00000016427	X	37187588	37191163	3	1
ENSMUSG00000016487	6	146888487	147032025	51	2
ENSMUSG00000016494	1	194938819	194961279	18	2
ENSMUSG00000016554	15	77958998	77970824	15	1
ENSMUSG00000016559	11	116021912	116027962	14	2
ENSMUSG00000017119 ENSMUSG00000099023	11	101552149	101581951	59	7
ENSMUSG00000017291	11	77529162	77607815	21	1
ENSMUSG00000017466	11	118301069	118355740	7	3
ENSMUSG00000017478	8	122376609	122417360	37	2
ENSMUSG00000017548	11	79993106	80034123	25	1
ENSMUSG00000017631	11	76416734	76622314	46	2
ENSMUSG00000017721	2	164497520	164508301	23	2
ENSMUSG00000017781	11	75588097	75628804	24	2
ENSMUSG00000017801	11	101087277	101092207	19	2
ENSMUSG00000018008	15	78597047	78622019	13	1
ENSMUSG00000018076	5	118560719	118765435	31	2
ENSMUSG00000018209	2	164070322	164155524	18	2
ENSMUSG00000018286	11	70525367	70527858	14	1
ENSMUSG00000018340	11	54979108	55033445	28	1
ENSMUSG00000018362	11	106988629	106999541	23	3
ENSMUSG00000018395	11	53567379	53601967	35	1
ENSMUSG00000018401	11	87592162	87616302	29	1
ENSMUSG00000018412	11	104333229	104468861	25	1
ENSMUSG00000018474	11	69343273	69369406	58	2
ENSMUSG00000018501	11	62316426	62458541	100	1
ENSMUSG00000018565	11	69968222	69982517	32	4
ENSMUSG00000018593	11	55394500	55420080	20	2
ENSMUSG00000018648	11	84048041	84069261	11	1
ENSMUSG00000018697	11	84422855	84513522	18	2
ENSMUSG00000018707	12	110601452	110666945	92	2
ENSMUSG00000018750	11	69765912	69784023	23	1
ENSMUSG00000018765	11	69632990	69653297	28	1
ENSMUSG00000018848	11	35808381	35834506	24	1
ENSMUSG00000018849	11	35838400	35980527	27	3
ENSMUSG00000018974	5	113742446	113771649	19	1
ENSMUSG00000019039	9	108569886	108572774	36	1
ENSMUSG00000019082	7	141429739	141437892	54	4
ENSMUSG00000019124	6	54505890	54566489	14	1
ENSMUSG00000019173	11	100715009	100738215	13	1
ENSMUSG00000019194	7	31116524	31126945	9	1
ENSMUSG00000019302	11	101009452	101063719	40	9
ENSMUSG00000019362	8	84246237	84249761	3	2
ENSMUSG00000019370	7	16915379	16924114	16	2
ENSMUSG00000019373	11	59817795	59839838	25	1
ENSMUSG00000019428	8	70527724	70535328	32	3
ENSMUSG00000019471	9	21138541	21149906	8	1
ENSMUSG00000019659	9	110656503	110711590	7	2
ENSMUSG00000019772	10	5639218	5647614	7	1
ENSMUSG00000019782	10	33996555	34019624	9	1
ENSMUSG00000019795	10	7629373	7681136	25	1
ENSMUSG00000019797	10	43525121	43540994	11	1
ENSMUSG00000019806	10	13647054	13868980	20	2
ENSMUSG00000019820	10	12382188	12861735	74	2
ENSMUSG00000019837	10	40249203	40257665	6	1
ENSMUSG00000019923	10	72654845	72674964	20	5
ENSMUSG00000019970	10	21882184	21999903	37	1
ENSMUSG00000019977	10	21295979	21368889	19	1
ENSMUSG00000019986	10	20952547	21080428	25	3
ENSMUSG00000019996	10	20148471	20281589	20	1
ENSMUSG00000019997	10	24595442	24598683	11	1
ENSMUSG00000020019	10	93640681	93747207	12	1
ENSMUSG00000020022	10	94198955	94221443	11	3
ENSMUSG00000020023	10	94311949	94590956	23	2
ENSMUSG00000020044	10	86300372	86349506	11	1
ENSMUSG00000020070	10	62980223	63017210	34	5
ENSMUSG00000020074	10	62743928	62792368	25	2
ENSMUSG00000020078	10	62454843	62486805	10	2
ENSMUSG00000020088	10	61680310	61693295	7	4
ENSMUSG00000020101	10	60346851	60372684	21	1
ENSMUSG00000020109	10	59879556	59899302	19	1
ENSMUSG00000020111	10	59702477	59864132	38	1
ENSMUSG00000020114	10	119199255	119240055	21	1
ENSMUSG00000020115	10	121546455	121586794	21	1
ENSMUSG00000020180	10	75517551	75537373	6	1
ENSMUSG00000020189	10	111164802	111297247	24	4
ENSMUSG00000020196	10	75646110	75764357	37	2
ENSMUSG00000020198	10	80706978	80742211	31	1
ENSMUSG00000020220	4	144972622	145195005	89	3
ENSMUSG00000020263	10	83600033	83648738	56	1
ENSMUSG00000020277	10	77986947	78010083	27	1
ENSMUSG00000020297	11	32000463	32059202	8	3
ENSMUSG00000020305	11	30954395	31102704	18	1
ENSMUSG00000020315	11	30099395	30268175	48	1
ENSMUSG00000020340	11	46193850	46312859	39	1
ENSMUSG00000020376	11	50025346	50104758	12	1
ENSMUSG00000020402	11	52360860	52389397	18	1
ENSMUSG00000020409	11	43433744	43447981	26	1
ENSMUSG00000020431	11	7063489	7178506	24	1
ENSMUSG00000020436	11	41910203	42000857	16	2
ENSMUSG00000020457 ENSMUSG00000023764	11	3131850	3266415	91	2
ENSMUSG00000020458	11	29692947	29744331	24	1
ENSMUSG00000020459	11	29526408	29545279	30	2
ENSMUSG00000020476	11	5788488	5800962	19	2
ENSMUSG00000020485	11	87737552	87743623	9	1
ENSMUSG00000020496	11	58932288	58938916	4	2
ENSMUSG00000020532	11	84129672	84401651	70	2
ENSMUSG00000020571	12	17266545	17284770	21	1
ENSMUSG00000020589	12	12262139	12376359	13	2
ENSMUSG00000020598	12	44328885	44601846	32	6
ENSMUSG00000020607	12	14147599	14152038	2	2
ENSMUSG00000020608	12	11265886	11319785	27	1
ENSMUSG00000020610	11	109425946	109452813	23	1
ENSMUSG00000020621	12	10390780	10395562	2	1
ENSMUSG00000020640	12	4593008	4713950	39	1
ENSMUSG00000020647	12	4247363	4477182	23	1
ENSMUSG00000020658	12	3962554	4038915	23	3
ENSMUSG00000020664	12	31331564	31351437	14	1
ENSMUSG00000020704	11	80880169	81968457	11	1
ENSMUSG00000020739	11	115564434	115583985	36	1
ENSMUSG00000020752	11	115892595	115933477	35	1
ENSMUSG00000020776	11	116142285	116168166	62	1
ENSMUSG00000020783	11	73047783	73080217	18	1
ENSMUSG00000020802	11	116537740	116581447	22	1
ENSMUSG00000020827	11	70562881	70614483	62	1
ENSMUSG00000020840	11	76924809	76987379	32	1
ENSMUSG00000020849	11	75732869	75765845	15	1
ENSMUSG00000020850	11	75486816	75509449	49	1
ENSMUSG00000020859	11	93996091	94126085	56	3
ENSMUSG00000020866	11	94408391	94474198	56	1
ENSMUSG00000020873	11	95384692	95391776	18	1
ENSMUSG00000020886	11	70017085	70045532	46	1
ENSMUSG00000020900	11	68691559	68816632	62	1
ENSMUSG00000020917	11	100476353	100528000	40	7
ENSMUSG00000020923	11	102304560	102319742	42	1
ENSMUSG00000020929	11	102838473	102880985	56	6
ENSMUSG00000020932	11	102887336	102900912	13	1
ENSMUSG00000020936	11	103028190	103068912	18	1
ENSMUSG00000020946	11	103676849	103697898	10	1
ENSMUSG00000020964	12	91806043	91849157	42	1
ENSMUSG00000020993	12	59043093	59061461	6	2
ENSMUSG00000021007	12	98628157	98669815	21	1
ENSMUSG00000021012	12	98746968	98787774	18	1
ENSMUSG00000021024	12	55384222	55418454	13	2
ENSMUSG00000021027 ENSMUSG00000092949	12	55602929	55821167	44	1
ENSMUSG00000021057	12	76324891	76334153	6	1
ENSMUSG00000021061	12	76580488	76710547	42	2
ENSMUSG00000021068	12	70011435	70111925	37	3
ENSMUSG00000021072	12	70453095	70468040	12	4
ENSMUSG00000021076	12	70937857	70964718	13	3
ENSMUSG00000021111	12	105784694	105838944	62	2
ENSMUSG00000021114	12	78842989	78861638	9	1
ENSMUSG00000021116	12	78861819	78887010	8	2
ENSMUSG00000021124	12	79156017	79172667	12	1
ENSMUSG00000021134	12	80945504	80950507	33	1
ENSMUSG00000021139 ENSMUSG00000090935 ENSMUSG00000091803	12	81358860	81532911	46	2
ENSMUSG00000021140	12	81860030	82000924	36	2
ENSMUSG00000021156	13	9684836	9765321	53	1
ENSMUSG00000021178	12	100110186	100123364	11	1
ENSMUSG00000021188	12	101834043	101913267	35	2
ENSMUSG00000021192	12	102469134	102497902	14	2
ENSMUSG00000021193	13	6548157	6580139	27	1
ENSMUSG00000021194	12	102554969	102565027	8	3
ENSMUSG00000021196	13	6579768	6648777	50	1
ENSMUSG00000021285	12	111828458	111908055	19	2
ENSMUSG00000021288	12	111758849	111807844	34	2
ENSMUSG00000021313	13	11553103	12106945	107	3
ENSMUSG00000021314	13	18948371	19150913	21	1
ENSMUSG00000021374	13	46679905	46727940	30	1
ENSMUSG00000021395	13	51100880	51152546	6	3
ENSMUSG00000021400	13	32802038	32822609	7	1
ENSMUSG00000021417	13	34977748	35027094	33	2
ENSMUSG00000021420	13	36117411	36537592	7	2
ENSMUSG00000021448	13	51431041	51567084	12	1
ENSMUSG00000021474	13	54071845	54108346	11	1
ENSMUSG00000021488	13	55209782	55318325	23	1
ENSMUSG00000021518	13	66932830	66998401	13	1
ENSMUSG00000021520	13	66900617	66905378	6	1
ENSMUSG00000021546	13	58391142	58403343	59	1
ENSMUSG00000021548	13	85189408	85223469	23	1
ENSMUSG00000021549	13	85214780	85289029	41	1
ENSMUSG00000021557	13	59449537	59585227	72	1
ENSMUSG00000021573	13	74009407	74035753	11	1
ENSMUSG00000021595	13	69533746	69635780	35	2
ENSMUSG00000021650	13	99319649	99344678	10	2
ENSMUSG00000021661	13	98263158	98274750	20	1
ENSMUSG00000021662	13	97898595	98206165	36	4
ENSMUSG00000021665	13	97176332	97198357	14	1
ENSMUSG00000021670	13	96648967	96670936	45	5
ENSMUSG00000021676	13	95627177	95891922	36	1
ENSMUSG00000021687	13	94201310	94285857	16	1
ENSMUSG00000021709	13	103818787	103920514	35	1
ENSMUSG00000021711	13	104142149	104178469	26	1
ENSMUSG00000021712	13	104178797	104203372	17	2
ENSMUSG00000021715	13	104631140	104817142	20	1
ENSMUSG00000021719	13	104947153	105054930	6	2
ENSMUSG00000021748	14	8165991	8172992	10	1
ENSMUSG00000021767	14	21481434	21672478	47	1
ENSMUSG00000021814	14	20455261	20480133	14	3
ENSMUSG00000021824	14	21031442	21052508	29	1
ENSMUSG00000021895	14	27238039	27403904	11	1
ENSMUSG00000021901	14	31251450	31259944	38	5
ENSMUSG00000021910	14	31170930	31216946	77	2
ENSMUSG00000021913	14	32322019	32347820	24	1
ENSMUSG00000021929	14	61365186	61439947	17	5
ENSMUSG00000021936	14	33377898	33447158	31	1
ENSMUSG00000021938	14	56722441	56778316	14	1
ENSMUSG00000021939	14	63122462	63145919	10	1
ENSMUSG00000021959 ENSMUSG00000021952	14	57581002	57758388	71	1
ENSMUSG00000021972	14	64811600	64949871	31	1
ENSMUSG00000021982	14	59560896	59597836	13	2
ENSMUSG00000021993	14	60784566	60903610	19	2
ENSMUSG00000022023	14	79459937	79481268	10	1
ENSMUSG00000022044	14	66344296	66361680	24	1
ENSMUSG00000022048	14	66802864	66868688	14	1
ENSMUSG00000022108	14	73362231	73385271	6	1
ENSMUSG00000022136	14	118937932	118981702	12	1
ENSMUSG00000022139	14	120275669	120431697	9	1
ENSMUSG00000022201	15	12117831	12185683	39	1
ENSMUSG00000022216	14	55578123	55581529	43	1
ENSMUSG00000022240	15	30172593	31029311	23	2
ENSMUSG00000022255	15	34082694	34142386	35	1
ENSMUSG00000022263	15	27730652	28025848	57	1
ENSMUSG00000022265 ENSMUSG00000098416	15	27466677	27594909	15	1
ENSMUSG00000022283	15	36595661	36608973	26	2
ENSMUSG00000022295	15	38661904	38692443	13	1
ENSMUSG00000022311	15	47580637	48792063	87	1
ENSMUSG00000022312	15	51786558	51865481	8	1
ENSMUSG00000022314	15	51962605	51991760	14	1
ENSMUSG00000022329	15	34875496	35155806	18	3
ENSMUSG00000022342	15	45106284	45114934	3	2
ENSMUSG00000022351	15	59315077	59331192	17	1
ENSMUSG00000022362 ENSMUSG00000022361 ENSMUSG00000101892	15	58022259	58076541	40	1
ENSMUSG00000022377	15	64086857	64382919	59	1
ENSMUSG00000022378	15	63929097	64060448	14	1
ENSMUSG00000022389	15	81802421	81826861	23	1
ENSMUSG00000022390	15	81744848	81796269	23	1
ENSMUSG00000022394	15	81663889	81688315	40	2
ENSMUSG00000022400	15	81466316	81476369	5	1
ENSMUSG00000022403	15	81363669	81400077	23	4
ENSMUSG00000022415	15	80091334	80119501	10	2
ENSMUSG00000022419	15	55112317	55259271	13	1
ENSMUSG00000022443	15	77760587	77842175	54	1
ENSMUSG00000022451	15	94577951	94589889	16	1
ENSMUSG00000022454	15	95219451	95528706	23	2
ENSMUSG00000022456	15	82274935	82294442	12	2
ENSMUSG00000022466	15	97675105	97705822	17	2
ENSMUSG00000022508	16	23965052	23988852	14	1
ENSMUSG00000022517	16	4886100	4938296	18	2
ENSMUSG00000022521	16	4081328	4213407	34	1
ENSMUSG00000022526	15	76852148	76871435	4	1
ENSMUSG00000022536	16	5013906	5049910	17	2
ENSMUSG00000022537	16	30511855	30550842	28	1
ENSMUSG00000022545	16	13109684	13150617	22	1
ENSMUSG00000022548	16	31296192	31314808	18	2
ENSMUSG00000022568	15	76047158	76069784	42	1
ENSMUSG00000022587	15	74955051	74959905	39	1
ENSMUSG00000022619	15	89453913	89464468	14	3
ENSMUSG00000022629	15	90933276	91049948	39	1
ENSMUSG00000022656	16	46387706	46498525	28	2
ENSMUSG00000022661	16	45382135	45409053	27	8
ENSMUSG00000022680	16	13833148	13903131	58	3
ENSMUSG00000022682	16	13780699	13814840	18	1
ENSMUSG00000022696	16	44240180	44333196	35	1
ENSMUSG00000022710	16	8689595	8792308	60	4
ENSMUSG00000022722	16	59612949	59639391	15	1
ENSMUSG00000022750	16	17759618	17793382	23	1
ENSMUSG00000022762	16	81200697	81624285	19	2
ENSMUSG00000022774	16	31948513	31961781	13	2
ENSMUSG00000022788	16	16416917	16600549	37	2
ENSMUSG00000022791	16	32643874	32683493	46	1
ENSMUSG00000022797	16	32608920	32632794	29	3
ENSMUSG00000022801	16	32914100	33015647	41	1
ENSMUSG00000022808	16	33251456	33299562	14	9
ENSMUSG00000022822	16	20331303	20426394	59	1
ENSMUSG00000022829	16	37114942	37384962	39	1
ENSMUSG00000022841	16	20535478	20544909	33	4
ENSMUSG00000022848	16	35694062	35769356	11	1
ENSMUSG00000022892	16	84954440	85173707	16	1
ENSMUSG00000022893	16	85793827	85803113	13	1
ENSMUSG00000022935	16	87896196	88056176	17	1
ENSMUSG00000022961	16	91647506	91679221	42	1
ENSMUSG00000022964	16	91574503	91597800	10	1
ENSMUSG00000022973	16	90936092	91011308	54	1
ENSMUSG00000023004	15	98931425	98934565	7	1
ENSMUSG00000023026	15	100038664	100219473	44	1
ENSMUSG00000023030	15	100387898	100425072	32	1
ENSMUSG00000023044	15	102176998	102189043	15	1
ENSMUSG00000023089	6	24518666	24528013	10	1
ENSMUSG00000023147	16	96145407	96157852	11	1
ENSMUSG00000023169	15	96571418	96642913	18	1
ENSMUSG00000023236	2	113776362	113829121	8	1
ENSMUSG00000023277	9	106203108	106215389	20	2
ENSMUSG00000023353	5	24452177	24502047	18	1
ENSMUSG00000023456	6	124810586	124814296	18	2
ENSMUSG00000023460	17	66494512	66519717	14	1
ENSMUSG00000023473 ENSMUSG00000093067	9	108826320	108852969	50	1
ENSMUSG00000023800	17	3326573	3519397	28	1
ENSMUSG00000023861	17	8282904	8297661	24	1
ENSMUSG00000023944	17	45567775	45573271	29	3
ENSMUSG00000023967	17	46110986	46128910	17	3
ENSMUSG00000023973	17	46735705	46752214	14	1
ENSMUSG00000023984 ENSMUSG00000090115 ENSMUSG00000092558	17	47611582	47686738	34	2
ENSMUSG00000024002	17	32196274	32284722	33	2
ENSMUSG00000024012	17	29332072	29347904	26	8
ENSMUSG00000024063	17	72918305	72941942	5	1
ENSMUSG00000024068	17	74338987	74391113	17	2
ENSMUSG00000024069	17	74395608	74424229	15	1
ENSMUSG00000024073	17	74528295	74703356	122	4
ENSMUSG00000024074	17	78200248	78376592	17	1
ENSMUSG00000024083	17	64281005	64331916	14	1
ENSMUSG00000024109	17	90033644	91092805	58	3
ENSMUSG00000024121	17	24163866	24169702	15	1
ENSMUSG00000024158	17	24840143	24864450	23	4
ENSMUSG00000024163 ENSMUSG00000073436	17	24888486	24936977	111	2
ENSMUSG00000024201	17	56326062	56402870	36	1
ENSMUSG00000024213	17	27579382	27623465	20	1
ENSMUSG00000024260	18	31634371	31723061	26	1
ENSMUSG00000024268	18	25477632	25753983	14	1
ENSMUSG00000024294	18	10725548	10818704	34	1
ENSMUSG00000024302	18	23415415	23659714	22	3
ENSMUSG00000024304	18	16588877	16809246	20	2
ENSMUSG00000024312	17	33940660	33949695	21	1
ENSMUSG00000024319	17	33955812	33966984	30	1
ENSMUSG00000024335	17	34112023	34122634	44	3
ENSMUSG00000024350	18	35671103	35703144	8	3
ENSMUSG00000024359	18	34937414	34954357	26	1
ENSMUSG00000024381	18	32377217	32435736	19	3
ENSMUSG00000024383	18	32163089	32236751	17	1
ENSMUSG00000024384	18	32067734	32104331	14	1
ENSMUSG00000024400	18	31804057	31908987	23	2
ENSMUSG00000024425	18	38418975	38464399	8	1
ENSMUSG00000024431	18	39410545	39491301	25	2
ENSMUSG00000024462	17	37045966	37075067	44	1
ENSMUSG00000024479	15	54571366	54602846	4	1
ENSMUSG00000024493	18	42202350	42262122	32	2
ENSMUSG00000024500	18	42637432	43059471	22	2
ENSMUSG00000024515	18	73639009	73703780	23	3
ENSMUSG00000024524	18	67088336	67226792	13	2
ENSMUSG00000024544	18	67933257	68255549	6	1
ENSMUSG00000024558	18	73928486	74065359	12	1
ENSMUSG00000024561	18	74268272	74282685	15	1
ENSMUSG00000024566	18	80734143	80934058	29	1
ENSMUSG00000024576	18	61555274	61590061	32	1
ENSMUSG00000024587	18	64499665	64516557	15	1
ENSMUSG00000024589	18	64887756	65217826	32	3
ENSMUSG00000024712	19	17394043	17401349	8	1
ENSMUSG00000024735	19	10895231	10909559	34	1
ENSMUSG00000024767	19	7198202	7206316	17	1
ENSMUSG00000024777	19	6227765	6235872	20	1
ENSMUSG00000024855	19	5133688	5273119	24	2
ENSMUSG00000024901	19	4930651	4943127	20	1
ENSMUSG00000024908	19	3454933	3575749	25	1
ENSMUSG00000024926	19	5603017	5610094	14	1
ENSMUSG00000024935	19	28835049	28913960	20	3
ENSMUSG00000024958	19	6938069	6942450	17	1
ENSMUSG00000024982	19	55298301	55316032	11	2
ENSMUSG00000025006	19	40295049	40402267	29	1
ENSMUSG00000025085	19	57032733	57314919	69	1
ENSMUSG00000025103	7	81792075	81829431	8	2
ENSMUSG00000025130	11	120560298	120573253	17	1
ENSMUSG00000025155	11	120789201	120796403	35	1
ENSMUSG00000025156	11	120784272	120789102	27	2
ENSMUSG00000025173	11	121327224	121354445	18	1
ENSMUSG00000025189	19	43440436	43497212	11	1
ENSMUSG00000025203 ENSMUSG00000093315	19	44293676	44306864	8	4
ENSMUSG00000025220	19	45750261	45783520	16	1
ENSMUSG00000025223	19	46032593	46045214	27	3
ENSMUSG00000025232	9	59539667	59565105	14	1
ENSMUSG00000025235	9	59321966	59353508	16	1
ENSMUSG00000025266	X	150983141	151017322	27	5
ENSMUSG00000025272	X	150645304	150657583	32	1
ENSMUSG00000025280	14	24448694	24487046	31	1
ENSMUSG00000025314	2	90429754	90580647	31	2
ENSMUSG00000025321	12	119158022	119238802	18	1
ENSMUSG00000025369	10	128459236	128490173	30	3
ENSMUSG00000025371	11	119913441	119919548	20	2
ENSMUSG00000025373	10	128411616	128441438	9	1
ENSMUSG00000025374	10	128401395	128411492	28	1
ENSMUSG00000025393	10	128083273	128090391	29	2
ENSMUSG00000025404	10	127380327	127499384	66	1
ENSMUSG00000025410	10	127266262	127281959	14	5
ENSMUSG00000025417	10	127197067	127211622	10	1
ENSMUSG00000025422	10	127078907	127093169	19	1
ENSMUSG00000025428	18	77773729	77782869	24	2
ENSMUSG00000025437	3	152346478	152393612	35	2
ENSMUSG00000025439	7	97696634	97718879	9	2
ENSMUSG00000025466	7	140096770	140102441	32	1
ENSMUSG00000025484	7	140853384	140856383	4	1
ENSMUSG00000025531	X	113040593	113185517	22	2
ENSMUSG00000025555	14	121035200	121283744	33	1
ENSMUSG00000025576	11	118489762	118911597	31	1
ENSMUSG00000025658	X	157821436	158043294	25	3
ENSMUSG00000025666	X	81070698	81097872	10	1
ENSMUSG00000025733 ENSMUSG00000093593 ENSMUSG00000025735 ENSMUSG00000073434	17	25834465	25861501	155	3
ENSMUSG00000025757	3	40744495	40796103	34	2
ENSMUSG00000025762	3	40950631	41040234	37	1
ENSMUSG00000025777	1	17145362	17164271	16	1
ENSMUSG00000025794	9	120571517	120574653	6	2
ENSMUSG00000025812	8	127063893	127612286	71	2
ENSMUSG00000025862	X	42149317	42277185	47	1
ENSMUSG00000025894	9	4294793	4309494	6	2
ENSMUSG00000025907	1	6206197	6276648	60	1
ENSMUSG00000025909	1	8361475	9299878	42	1
ENSMUSG00000025921	1	16105774	16133734	8	1
ENSMUSG00000025949	1	65186683	65278695	66	1
ENSMUSG00000025964	1	63445891	63596276	46	6
ENSMUSG00000025969	1	62703285	62818695	22	1
ENSMUSG00000025980	1	55077835	55088243	15	2
ENSMUSG00000026018	1	59982490	60043184	27	1
ENSMUSG00000026021	1	59586558	59670834	11	6
ENSMUSG00000026028	1	58900449	58973430	25	3
ENSMUSG00000026074	1	39900913	40026310	66	1
ENSMUSG00000026082	1	38052786	38129801	50	1
ENSMUSG00000026083	1	37998010	38055579	35	3
ENSMUSG00000026087	1	37890477	37898535	19	1
ENSMUSG00000026090	1	37611677	37720085	15	1
ENSMUSG00000026109	1	50900647	51187270	20	1
ENSMUSG00000026113	1	37299865	37410736	54	1
ENSMUSG00000026131 ENSMUSG00000103888 ENSMUSG00000103405	1	33908225	34308661	145	3
ENSMUSG00000026150	1	82724890	82752394	39	4
ENSMUSG00000026155	1	23844846	23922317	25	1
ENSMUSG00000026159 ENSMUSG00000093782	1	82839446	82901182	31	1
ENSMUSG00000026171	1	74593748	74601397	31	1
ENSMUSG00000026202	1	75214228	75219865	19	2
ENSMUSG00000026219	1	84721189	84840516	80	1
ENSMUSG00000026276	1	93478964	93510260	43	1
ENSMUSG00000026277	1	93619751	93658659	24	1
ENSMUSG00000026305	1	90998737	91128944	49	1
ENSMUSG00000026312	1	109982431	110140157	38	1
ENSMUSG00000026313	1	91928779	92180341	46	1
ENSMUSG00000026365	1	140084708	140183764	36	1
ENSMUSG00000026374	1	118294778	118311739	17	1
ENSMUSG00000026385	1	120113280	120121078	18	2
ENSMUSG00000026434	1	131910534	131936321	12	1
ENSMUSG00000026442	1	132564690	132741797	51	2
ENSMUSG00000026458	1	134296783	134332928	39	1
ENSMUSG00000026478	1	153218922	153332786	37	1
ENSMUSG00000026482	1	152516760	152766351	29	1
ENSMUSG00000026490	1	179960472	180165603	74	2
ENSMUSG00000026509	1	182467260	182517608	33	1
ENSMUSG00000026553	1	172082529	172122330	56	1
ENSMUSG00000026563	1	166379097	166393621	15	1
ENSMUSG00000026608	1	188971095	189007841	39	1
ENSMUSG00000026623	1	191717834	191784255	17	1
ENSMUSG00000026663	1	170704674	170867771	18	1
ENSMUSG00000026670	1	170141938	170174957	29	2
ENSMUSG00000026728	2	13573927	13582826	23	4
ENSMUSG00000026739	2	18677018	18686629	22	1
ENSMUSG00000026748	2	16356304	16755839	21	1
ENSMUSG00000026750	2	38588036	38644087	10	1
ENSMUSG00000026775	2	23156369	23199260	29	1
ENSMUSG00000026790	2	29889221	29931746	68	2
ENSMUSG00000026811	2	32599709	32620806	29	1
ENSMUSG00000026812	2	28641228	28691167	48	1
ENSMUSG00000026821	2	28513125	28553081	42	1
ENSMUSG00000026824	2	55435970	55598145	8	1
ENSMUSG00000026825	2	32308471	32353329	50	4
ENSMUSG00000026853	2	30400471	30415813	45	1
ENSMUSG00000026854	2	30982279	31023586	49	1
ENSMUSG00000026860	2	30344809	30359337	39	1
ENSMUSG00000026864	2	34771970	34777547	22	1
ENSMUSG00000026878	2	35180205	35201120	22	2
ENSMUSG00000026895	2	36036326	36049406	4	1
ENSMUSG00000026904	2	62046462	62326730	37	1
ENSMUSG00000026915	2	37483228	37703859	33	1
ENSMUSG00000026932	2	26055535	26123220	24	1
ENSMUSG00000026959	2	25291181	25319187	42	1
ENSMUSG00000026966	2	25271039	25272438	10	1
ENSMUSG00000026970	2	60750193	60963192	29	1
ENSMUSG00000027002	2	80500512	80581380	41	2
ENSMUSG00000027010	2	71271063	71367749	28	1
ENSMUSG00000027035	2	68861441	69114282	23	1
ENSMUSG00000027067	2	85037234	85047109	33	1
ENSMUSG00000027080	2	84678402	84688215	8	1
ENSMUSG00000027104 ENSMUSG00000099302	2	73816509	73892639	47	2
ENSMUSG00000027131	2	112363011	112368027	8	4
ENSMUSG00000027175	2	104657288	104712169	23	1
ENSMUSG00000027185	2	103721256	103761270	53	2
ENSMUSG00000027193	2	94411682	94438136	22	1
ENSMUSG00000027206	2	125830304	125859139	24	2
ENSMUSG00000027210	2	115863064	116065839	45	4
ENSMUSG00000027270	2	136052239	136069917	15	2
ENSMUSG00000027273	2	136713453	136782428	13	4
ENSMUSG00000027286	2	120604238	120609520	21	2
ENSMUSG00000027298	2	119797733	119818104	36	1
ENSMUSG00000027304	2	119675068	119735407	26	1
ENSMUSG00000027305	2	119655446	119662827	15	1
ENSMUSG00000027312	2	130906495	131030333	37	1
ENSMUSG00000027340	2	132052496	132145108	29	1
ENSMUSG00000027347	2	117279993	117343001	25	2
ENSMUSG00000027350	2	132781278	132795079	5	1
ENSMUSG00000027363	2	126707328	126759297	26	3
ENSMUSG00000027365	2	126791565	126876230	64	1
ENSMUSG00000027397	2	129198764	129211616	29	1
ENSMUSG00000027406	2	130279309	130284547	21	1
ENSMUSG00000027423	2	144250123	144270906	32	1
ENSMUSG00000027438	2	148693985	148732467	15	3
ENSMUSG00000027475	2	153291413	153333390	9	1
ENSMUSG00000027502	2	172440556	172469908	12	1
ENSMUSG00000027506	3	8925593	9004723	29	1
ENSMUSG00000027533	3	10012548	10016607	8	5
ENSMUSG00000027581	2	181306459	181314500	5	3
ENSMUSG00000027593 ENSMUSG00000027596	2	154791096	155051012	45	1
ENSMUSG00000027602	2	155276297	155278073	8	1
ENSMUSG00000027603	2	155490379	155518237	26	1
ENSMUSG00000027624	2	156420909	156543214	44	2
ENSMUSG00000027634	2	156927345	156992056	40	6
ENSMUSG00000027637	2	156863128	156873563	10	4
ENSMUSG00000027646	2	157418444	157471862	30	1
ENSMUSG00000027673	3	32736990	32751566	23	1
ENSMUSG00000027692	3	28263214	28675858	55	2
ENSMUSG00000027737	3	49892526	50443614	21	1
ENSMUSG00000027742	3	52981875	53017237	30	1
ENSMUSG00000027770	3	62468013	62507004	34	1
ENSMUSG00000027782	3	69067149	69127113	21	3
ENSMUSG00000027808	3	58521969	58525873	3	1
ENSMUSG00000027810	3	58525821	58557501	25	5
ENSMUSG00000027823	3	63976106	64022579	16	1
ENSMUSG00000027828	3	65379655	65392623	10	1
ENSMUSG00000027879	3	97901190	97923276	12	1
ENSMUSG00000027893	3	107663118	107696560	34	1
ENSMUSG00000027894	3	107467543	107518018	37	1
ENSMUSG00000027940	3	90072649	90100902	42	2
ENSMUSG00000027944	3	89995457	89998686	7	5
ENSMUSG00000027981 ENSMUSG00000074264	3	113555710	113630149	49	1
ENSMUSG00000027984	3	131233419	131272101	11	1
ENSMUSG00000027993	3	84160439	84305446	48	2
ENSMUSG00000028005	3	82032004	82074711	22	2
ENSMUSG00000028020	3	80843599	80913660	21	5
ENSMUSG00000028029	3	132660498	132683879	7	1
ENSMUSG00000028048	3	89202928	89208681	14	1
ENSMUSG00000028053	3	88950622	89079375	32	1
ENSMUSG00000028059	3	88607454	88648052	92	1
ENSMUSG00000028060	3	88685794	88712933	14	1
ENSMUSG00000028161	3	136670124	136937727	25	1
ENSMUSG00000028180	3	157534160	157548390	24	1
ENSMUSG00000028207	4	9448069	9669344	45	1
ENSMUSG00000028226	4	17852893	18119145	25	1
ENSMUSG00000028232	4	3549041	3574853	20	2
ENSMUSG00000028249	4	6365650	6408423	25	2
ENSMUSG00000028273	3	142239586	142395696	22	1
ENSMUSG00000028292	4	34614957	34660167	34	1
ENSMUSG00000028351	4	68761514	68954397	11	2
ENSMUSG00000028382	4	59471868	59549364	42	1
ENSMUSG00000028383	4	59581563	59618689	16	1
ENSMUSG00000028393	4	62509169	62519918	16	2
ENSMUSG00000028399	4	75941238	78211961	82	1
ENSMUSG00000028402	4	81278500	81442815	68	1
ENSMUSG00000028403	4	82798738	82859958	20	1
ENSMUSG00000028423	4	40970906	41025993	36	4
ENSMUSG00000028426	4	55350043	55392237	17	1
ENSMUSG00000028431	4	56749680	56802331	47	1
ENSMUSG00000028447	4	41714798	41723170	11	6
ENSMUSG00000028452	4	42979963	43000507	27	2
ENSMUSG00000028467	4	43566928	43578873	32	1
ENSMUSG00000028468	4	43578715	43587487	25	1
ENSMUSG00000028478	4	44004452	44032846	14	3
ENSMUSG00000028484	4	83455680	83486459	28	1
ENSMUSG00000028522	4	103114390	103165754	45	1
ENSMUSG00000028528	4	101496648	101642799	33	4
ENSMUSG00000028530	4	101152367	101265282	43	2
ENSMUSG00000028557	4	109451098	109484728	9	3
ENSMUSG00000028567	4	108834601	108862127	11	1
ENSMUSG00000028576	4	94614491	94693229	22	1
ENSMUSG00000028639	4	119277981	119294604	21	2
ENSMUSG00000028649	4	123349633	123684360	140	3
ENSMUSG00000028657	4	122836242	122859175	16	4
ENSMUSG00000028675	4	135870918	135873850	7	1
ENSMUSG00000028708	4	115839198	115879250	39	1
ENSMUSG00000028756 ENSMUSG00000099200 ENSMUSG00000098364	4	138313409	138326307	16	1
ENSMUSG00000028760	4	137993022	138208508	61	3
ENSMUSG00000028772	4	130315383	130359943	16	1
ENSMUSG00000028773	4	130308595	130315463	4	2
ENSMUSG00000028821	4	134930898	134937548	12	7
ENSMUSG00000028843	4	134127406	134128789	7	1
ENSMUSG00000028869	4	125016585	125055380	28	1
ENSMUSG00000028879	4	132853501	132884509	11	1
ENSMUSG00000028906	4	131923413	132075321	46	1
ENSMUSG00000028911	4	131873617	131901706	16	1
ENSMUSG00000028923	4	141066512	141078357	29	1
ENSMUSG00000028931 ENSMUSG00000089757	4	152390742	152477871	47	2
ENSMUSG00000028944	5	24862744	25100642	35	1
ENSMUSG00000028960	4	149328416	149426749	49	1
ENSMUSG00000028964	4	150897133	150914437	28	2
ENSMUSG00000028969	5	24418250	24423530	12	4
ENSMUSG00000028991	4	148448611	148557683	65	1
ENSMUSG00000029004	5	23434441	23504235	37	1
ENSMUSG00000029007	4	148077061	148088031	8	1
ENSMUSG00000029050	4	155154075	155222592	11	3
ENSMUSG00000029062	4	155624854	155649938	39	1
ENSMUSG00000029071	4	155847402	155859303	36	1
ENSMUSG00000029095	5	35757880	35884973	49	1
ENSMUSG00000029103	5	35091490	35105766	22	1
ENSMUSG00000029104	5	34761740	34912534	80	2
ENSMUSG00000029106 ENSMUSG00000099082	5	34573664	34632308	46	3
ENSMUSG00000029110	5	34336289	34355629	31	1
ENSMUSG00000029131	5	29735688	29786478	27	2
ENSMUSG00000029145	5	31187558	31193430	33	6
ENSMUSG00000029148	5	31240864	31251566	48	2
ENSMUSG00000029151	5	31086106	31108237	19	1
ENSMUSG00000029152	5	73292794	73314077	11	1
ENSMUSG00000029166	5	30814641	30866106	17	1
ENSMUSG00000029221	5	67306955	67358565	24	1
ENSMUSG00000029227	5	74535449	74598790	36	1
ENSMUSG00000029253	5	86012043	86065583	19	1
ENSMUSG00000029291	5	88583574	88642671	13	1
ENSMUSG00000029312	5	103861973	103911259	15	1
ENSMUSG00000029319	5	100654723	100675140	15	4
ENSMUSG00000029364	5	117357304	117378601	19	2
ENSMUSG00000029404	5	124116089	124118196	14	1
ENSMUSG00000029422	5	123728426	123749414	56	9
ENSMUSG00000029427	5	123698302	123721044	14	2
ENSMUSG00000029430	5	129020069	129024323	11	1
ENSMUSG00000029434	5	123528764	123573015	13	2
ENSMUSG00000029436 ENSMUSG00000092933	5	129584155	129608875	14	1
ENSMUSG00000029438	5	123343834	123374082	11	2
ENSMUSG00000029458	5	121660563	121687248	24	2
ENSMUSG00000029463	5	122364580	122372364	7	1
ENSMUSG00000029465	5	122391878	122406179	20	1
ENSMUSG00000029467	5	122442702	122502225	23	1
ENSMUSG00000029469	5	122550204	122614518	32	1
ENSMUSG00000029478	5	125017153	125179219	75	1
ENSMUSG00000029502	5	110176701	110226470	35	3
ENSMUSG00000029538	5	115327177	115333080	11	1
ENSMUSG00000029560	5	140340304	140389251	11	1
ENSMUSG00000029580	5	142903115	142906754	26	2
ENSMUSG00000029599	5	120613130	120628590	20	2
ENSMUSG00000029621	5	145083830	145108761	22	2
ENSMUSG00000029640	5	146734809	146795006	14	1
ENSMUSG00000029648	5	147561604	147726011	37	1
ENSMUSG00000029657	5	149614287	149636376	30	2
ENSMUSG00000029673	5	131437333	132543344	53	2
ENSMUSG00000029674	5	134656039	134688590	31	1
ENSMUSG00000029686	6	47453398	47526139	45	1
ENSMUSG00000029705	5	136248135	136567490	64	1
ENSMUSG00000029767	6	29348069	29377110	24	1
ENSMUSG00000029819	6	49822710	49829507	4	1
ENSMUSG00000029838	6	36715663	36811361	5	1
ENSMUSG00000029869	6	41605482	41620509	27	2
ENSMUSG00000029916	6	40325478	40396762	16	1
ENSMUSG00000029922	6	39397804	39420462	23	2
ENSMUSG00000029924	6	39334770	39377707	15	1
ENSMUSG00000029999	6	86195251	86275639	14	1
ENSMUSG00000030007	6	85451505	85468477	12	4
ENSMUSG00000030016	6	83914353	83986869	34	1
ENSMUSG00000030020	6	92370892	92706145	15	1
ENSMUSG00000030058	6	87887814	87913595	47	1
ENSMUSG00000030059	6	97155266	97179124	19	1
ENSMUSG00000030067 ENSMUSG00000093661 ENSMUSG00000030068	6	98925338	99666797	83	2
ENSMUSG00000030077	6	103510876	103733035	27	1
ENSMUSG00000030084	6	89316316	89362613	36	1
ENSMUSG00000030102	6	108213118	108551109	62	3
ENSMUSG00000030122	6	124913681	124917946	9	3
ENSMUSG00000030134	6	118066385	118091546	13	1
ENSMUSG00000030138	6	118383383	118419417	23	1
ENSMUSG00000030172	6	119570796	119848167	48	1
ENSMUSG00000030209	6	135713232	136173511	22	1
ENSMUSG00000030224	6	137735078	137751932	14	2
ENSMUSG00000030226	6	138362918	138581968	22	1
ENSMUSG00000030243	6	142350342	142387087	40	1
ENSMUSG00000030265	6	145216699	145250239	17	2
ENSMUSG00000030268	6	144993835	145076184	26	1
ENSMUSG00000030272	6	113334124	113343984	28	1
ENSMUSG00000030302	6	113745669	114042613	40	1
ENSMUSG00000030306	6	148232430	148444389	22	2
ENSMUSG00000030313	6	148988071	149101680	30	1
ENSMUSG00000030315	6	114860628	114969994	15	1
ENSMUSG00000030350	6	127689011	127769472	10	1
ENSMUSG00000030374	7	16815889	16840931	50	4
ENSMUSG00000030376	7	16130300	16160509	10	1
ENSMUSG00000030428	7	4119408	4136706	45	3
ENSMUSG00000030447	7	55841745	55930700	52	1
ENSMUSG00000030451	7	56050155	56231794	95	4
ENSMUSG00000030465	8	67689082	68062286	34	1
ENSMUSG00000030519	7	64501706	64753870	22	1
ENSMUSG00000030605	7	79133769	79149060	10	1
ENSMUSG00000030629	7	84615054	84679361	9	2
ENSMUSG00000030653	7	101421691	101512829	36	1
ENSMUSG00000030655	7	118131308	118243637	73	1
ENSMUSG00000030685 ENSMUSG00000030683 ENSMUSG00000095334	7	126928879	126970606	49	3
ENSMUSG00000030689	7	126851580	126862377	26	1
ENSMUSG00000030691	7	101108775	101284405	34	1
ENSMUSG00000030695	7	126795234	126800751	31	1
ENSMUSG00000030701	7	100642892	100662414	27	1
ENSMUSG00000030718	7	100326737	100371896	14	1
ENSMUSG00000030729	7	100227394	100278868	19	2
ENSMUSG00000030738	7	126546455	126566411	21	2
ENSMUSG00000030759	7	113513834	113571511	32	1
ENSMUSG00000030774	7	97842935	97912381	15	1
ENSMUSG00000030779	7	122965686	123002557	31	2
ENSMUSG00000030811	7	127745201	127769476	22	4
ENSMUSG00000030824	7	45492874	45510406	31	1
ENSMUSG00000030835	7	46033698	46084212	39	1
ENSMUSG00000030854	7	47077798	47133684	39	1
ENSMUSG00000030880	7	120917744	120947432	21	1
ENSMUSG00000030884	7	120635176	120659478	24	9
ENSMUSG00000030934	7	132557475	132576398	10	1
ENSMUSG00000030946	7	132610638	132706420	16	1
ENSMUSG00000030980	7	118842222	118856254	17	2
ENSMUSG00000030982	7	118740226	118842966	56	1
ENSMUSG00000031007	X	12587801	12617049	10	1
ENSMUSG00000031010	X	13071498	13173328	59	3
ENSMUSG00000031012	X	13517080	13851367	48	1
ENSMUSG00000031059	X	20615326	20617619	3	2
ENSMUSG00000031065	X	20687954	20699880	36	1
ENSMUSG00000031066	X	20703906	20720539	30	3
ENSMUSG00000031068	7	137437648	137468594	11	2
ENSMUSG00000031129	9	94669909	95230445	21	1
ENSMUSG00000031157	X	7894519	7899269	19	3
ENSMUSG00000031166	X	8123301	8132892	31	11
ENSMUSG00000031176	X	9654267	9663003	10	1
ENSMUSG00000031221	X	100494291	100516125	8	2
ENSMUSG00000031229	X	105797615	105929397	76	4
ENSMUSG00000031299	X	160122209	160138413	16	1
ENSMUSG00000031310	X	101404384	101420849	68	1
ENSMUSG00000031311	X	101429318	101448591	27	1
ENSMUSG00000031370	X	163935443	163958661	28	2
ENSMUSG00000031431	X	140539528	140600659	15	2
ENSMUSG00000031442	8	12873806	13020905	81	2
ENSMUSG00000031467	8	18846277	18891361	11	1
ENSMUSG00000031505	8	11497506	11514960	22	3
ENSMUSG00000031529	8	34829179	34965690	27	4
ENSMUSG00000031540	8	22859535	22943259	21	1
ENSMUSG00000031545	8	23172946	23208453	13	1
ENSMUSG00000031558	5	47983155	48306282	73	1
ENSMUSG00000031561	8	48227682	48844026	39	1
ENSMUSG00000031617	8	77595982	77610698	17	1
ENSMUSG00000031633	8	46206797	46211284	6	2
ENSMUSG00000031660	8	88331039	88362194	32	4
ENSMUSG00000031667	8	91112041	91134465	21	1
ENSMUSG00000031668	6	70844515	70905245	23	2
ENSMUSG00000031672	8	95864134	95888547	12	2
ENSMUSG00000031683	8	78804865	78821140	10	2
ENSMUSG00000031691	8	85036915	85057583	27	1
ENSMUSG00000031700	8	85492576	85527560	20	1
ENSMUSG00000031703	8	85717557	85840949	18	2
ENSMUSG00000031708	8	83571700	83594491	15	1
ENSMUSG00000031715	8	80698507	80739497	35	1
ENSMUSG00000031723	8	109565892	109574051	8	1
ENSMUSG00000031748	8	93809966	93969388	30	3
ENSMUSG00000031751	8	93971588	94012663	20	1
ENSMUSG00000031765	8	94179089	94180325	3	1
ENSMUSG00000031782	8	94838321	94854895	22	1
ENSMUSG00000031818	8	120668222	120674207	18	2
ENSMUSG00000031833	8	70778117	70792433	26	1
ENSMUSG00000031865	6	83165920	83200117	57	4
ENSMUSG00000031913	8	107031222	107045755	16	1
ENSMUSG00000031918	9	13748410	13806481	31	1
ENSMUSG00000031938	9	15283337	15306448	11	1
ENSMUSG00000031948	8	111993440	112011323	19	1
ENSMUSG00000031950	8	111940703	111953612	8	1
ENSMUSG00000031960	8	111033144	111057664	39	2
ENSMUSG00000031996	9	31149557	31211815	18	1
ENSMUSG00000031997	9	8544196	8680565	13	1
ENSMUSG00000032076	9	47530173	47857637	26	1
ENSMUSG00000032087	9	45430293	45753164	33	1
ENSMUSG00000032096	9	44741564	44767845	15	1
ENSMUSG00000032097	9	44604892	44640731	14	2
ENSMUSG00000032115	9	44379490	44392369	53	3
ENSMUSG00000032116	9	36729344	36767679	30	3
ENSMUSG00000032118	9	36821939	36878924	26	3
ENSMUSG00000032212	9	70542920	70592237	21	1
ENSMUSG00000032216	9	72662346	72749852	47	3
ENSMUSG00000032244	9	62791832	62811648	2	2
ENSMUSG00000032249	9	62341293	62378812	27	1
ENSMUSG00000032253	9	82866159	82975516	75	1
ENSMUSG00000032263	9	83925145	84124240	18	1
ENSMUSG00000032297	9	59577917	59607292	25	1
ENSMUSG00000032301	9	54950790	54958030	22	2
ENSMUSG00000032328	9	79768943	79793507	10	1
ENSMUSG00000032330	9	79755241	79759853	4	1
ENSMUSG00000032349	9	77917364	77984519	14	1
ENSMUSG00000032356	9	89909908	90026977	34	1
ENSMUSG00000032382	9	66088133	66126587	28	1
ENSMUSG00000032386	9	65828930	65908794	32	3
ENSMUSG00000032452	9	97444395	98033181	20	2
ENSMUSG00000032468	9	99478372	99568899	27	1
ENSMUSG00000032481	9	110132024	110240177	28	3
ENSMUSG00000032503	9	112065091	112235938	81	1
ENSMUSG00000032517	9	120149742	120181484	8	1
ENSMUSG00000032536	9	121366958	121474916	16	1
ENSMUSG00000032570	9	105403539	105527319	70	1
ENSMUSG00000032612	9	108347853	108392545	42	1
ENSMUSG00000032740	11	29373658	29510808	46	1
ENSMUSG00000032777	7	125640955	125707780	37	1
ENSMUSG00000032826	3	126921606	127499259	113	1
ENSMUSG00000032827	6	4902917	5165661	46	2
ENSMUSG00000032854	3	125865359	125938550	6	1
ENSMUSG00000032966	2	151542483	151561692	27	1
ENSMUSG00000033004	14	103113411	103346814	96	1
ENSMUSG00000033014	3	103279293	103358768	20	1
ENSMUSG00000033020	15	79141351	79151774	5	1
ENSMUSG00000033066	11	67455437	67688990	37	3
ENSMUSG00000033096	2	150583080	150608567	15	1
ENSMUSG00000033099	15	78934933	78943634	16	3
ENSMUSG00000033111	14	12284209	12303231	6	1
ENSMUSG00000033161	3	101576219	101604603	27	2
ENSMUSG00000033208	10	76253853	76261159	3	2
ENSMUSG00000033282	8	91217030	91313262	35	1
ENSMUSG00000033392	9	113812586	113919697	37	2
ENSMUSG00000033409 ENSMUSG00000078908	8	113635586	113655533	20	1
ENSMUSG00000033419	9	86765923	86880654	47	3
ENSMUSG00000033460	X	134717963	134721917	24	2
ENSMUSG00000033499	13	9093881	9174451	32	1
ENSMUSG00000033526	2	121310561	121355396	71	3
ENSMUSG00000033594	8	123232255	123236209	6	4
ENSMUSG00000033653	16	21423118	21644680	72	1
ENSMUSG00000033658	8	111003188	111031751	14	2
ENSMUSG00000033701	1	155558120	155691330	22	4
ENSMUSG00000033712	14	70138177	70153811	21	3
ENSMUSG00000033768	19	6418731	6544169	53	3
ENSMUSG00000033790	7	55794148	55831447	23	1
ENSMUSG00000033808	2	120355312	120404113	35	7
ENSMUSG00000033862	8	123224841	123232250	13	1
ENSMUSG00000033904	7	118712552	118737024	25	1
ENSMUSG00000033916	7	13032006	13034777	6	1
ENSMUSG00000033931	8	126947175	126971079	11	1
ENSMUSG00000033943	2	119897228	119969581	56	2
ENSMUSG00000033953 ENSMUSG00000078970	11	17159263	17233796	20	1
ENSMUSG00000033964	1	139422383	139453007	11	1
ENSMUSG00000033998	8	125995102	126030683	3	1
ENSMUSG00000034007	9	55549883	55919605	31	5
ENSMUSG00000034021	5	150673739	150810690	47	5
ENSMUSG00000034024	10	117050998	117063814	16	1
ENSMUSG00000034088	1	93405940	93478815	48	1
ENSMUSG00000034111	12	87166242	87200229	6	1
ENSMUSG00000034135	9	46012820	46224194	34	2
ENSMUSG00000034154	2	119373042	119477687	40	1
ENSMUSG00000034160	X	101640060	101684351	38	1
ENSMUSG00000034163	10	115384959	115432772	41	1
ENSMUSG00000034269	6	113077365	113153435	57	1
ENSMUSG00000034292	1	91494647	91529307	20	1
ENSMUSG00000034295	18	24709445	25133500	27	1
ENSMUSG00000034312	6	90659598	90810123	26	1
ENSMUSG00000034354	11	4480868	4594863	30	2
ENSMUSG00000034403	X	99465734	99471273	15	6
ENSMUSG00000034501	12	72536357	72580213	11	1
ENSMUSG00000034525	13	70588689	70637634	19	4
ENSMUSG00000034544	3	66981390	67358396	31	1
ENSMUSG00000034557	4	108637466	108780798	22	1
ENSMUSG00000034566	11	115415689	115419962	17	1
ENSMUSG00000034574	12	71831078	71992367	26	2
ENSMUSG00000034586	11	115347707	115367756	34	2
ENSMUSG00000034593	9	75071015	75223688	66	1
ENSMUSG00000034656	8	84388440	84640246	67	2
ENSMUSG00000034675	13	55473429	55488111	33	1
ENSMUSG00000034723	2	134594185	134644145	15	2
ENSMUSG00000034730 ENSMUSG00000093340	15	74516195	74589465	57	1
ENSMUSG00000034868	17	70973920	70990787	8	1
ENSMUSG00000034893	14	75702351	75754493	23	2
ENSMUSG00000034902	10	81292963	81319973	40	2
ENSMUSG00000034958	10	81204508	81230833	17	1
ENSMUSG00000034994	10	81176631	81182507	14	2
ENSMUSG00000035150	X	94188707	94212862	16	1
ENSMUSG00000035151	8	83312632	83332486	20	2
ENSMUSG00000035152	11	83299024	83405035	36	3
ENSMUSG00000035247	12	51743722	51829536	48	2
ENSMUSG00000035268	2	163658386	163726158	21	1
ENSMUSG00000035284	9	67840396	67995634	85	1
ENSMUSG00000035310	5	100441918	100500639	30	1
ENSMUSG00000035342	19	45015176	45027104	8	1
ENSMUSG00000035392	2	37798991	38287390	40	2
ENSMUSG00000035437 ENSMUSG00000053164	2	37443279	37566454	44	1
ENSMUSG00000035469	14	59201209	59237265	39	2
ENSMUSG00000035529	10	85891970	85916945	12	1
ENSMUSG00000035545	7	4137039	4148173	38	2
ENSMUSG00000035566	14	84443563	84537060	4	1
ENSMUSG00000035569	8	122883337	122974793	22	1
ENSMUSG00000035629	16	32821703	32877766	37	2
ENSMUSG00000035726	14	52160419	52197239	26	1
ENSMUSG00000035770	8	104417674	104443047	13	1
ENSMUSG00000035776	X	71420060	71492849	16	1
ENSMUSG00000035781	10	79910053	79917006	12	1
ENSMUSG00000035798	10	110941782	111010066	19	3
ENSMUSG00000035863	10	79793572	79820896	9	2
ENSMUSG00000035898	5	86110720	86172803	37	1
ENSMUSG00000035900	15	86057695	86137634	31	1
ENSMUSG00000035901	7	109893780	109960470	36	1
ENSMUSG00000035934	9	36890982	37147322	34	2
ENSMUSG00000035954	12	40446053	40846486	53	1
ENSMUSG00000035960	14	50924968	50927139	13	2
ENSMUSG00000035969	4	43381979	43427088	50	1
ENSMUSG00000036023	14	50807946	50821300	16	1
ENSMUSG00000036053	2	52857860	53134202	39	1
ENSMUSG00000036054	8	70234226	70279915	41	1
ENSMUSG00000036095	12	37880705	38633410	25	3
ENSMUSG00000036257	12	44221370	44312343	23	1
ENSMUSG00000036306	8	69132669	69184225	12	2
ENSMUSG00000036309	11	52231995	52246858	17	5
ENSMUSG00000036333	12	24974932	25059697	32	1
ENSMUSG00000036371	6	67266979	67289302	8	1
ENSMUSG00000036435	5	76529311	76570294	42	1
ENSMUSG00000036452	18	38601534	39376284	59	3
ENSMUSG00000036550	8	95719451	95807462	50	1
ENSMUSG00000036565	5	140620586	140649031	14	1
ENSMUSG00000036591	2	20847919	20968881	68	1
ENSMUSG00000036634	7	30899176	30914873	31	1
ENSMUSG00000036667	6	42668002	42710072	25	2
ENSMUSG00000036698	15	73095844	73184840	19	1
ENSMUSG00000036955	10	62538626	62578457	23	1
ENSMUSG00000036964 ENSMUSG00000078851	11	58954685	58973098	10	2
ENSMUSG00000036980	5	138178617	138187451	30	1
ENSMUSG00000036990	8	79639618	79677724	33	1
ENSMUSG00000037012	10	62268855	62379908	47	2
ENSMUSG00000037032	7	105558483	105581653	55	3
ENSMUSG00000037149	12	13219308	13249213	26	1
ENSMUSG00000037152	3	51404677	51408988	11	2
ENSMUSG00000037197	2	11585437	11604153	22	1
ENSMUSG00000037210	5	34369933	34486456	25	1
ENSMUSG00000037259	2	144470557	144527414	27	3
ENSMUSG00000037270	3	36863106	37053033	129	5
ENSMUSG00000037287	9	42412316	42507809	21	2
ENSMUSG00000037331	11	58009064	58062034	25	2
ENSMUSG00000037344	5	137314558	137333597	19	1
ENSMUSG00000037364	5	137295704	137307674	20	1
ENSMUSG00000037426	5	32863701	32994231	75	1
ENSMUSG00000037458	15	38487430	38519266	31	4
ENSMUSG00000037470	1	36140027	36244720	63	4
ENSMUSG00000037475	X	41794991	41920674	71	1
ENSMUSG00000037487	15	37967328	38078853	59	1
ENSMUSG00000037519	7	144476758	144553729	53	1
ENSMUSG00000037531	3	32725397	32737605	11	1
ENSMUSG00000037579	15	99224976	99242817	15	1
ENSMUSG00000037625	3	31149920	31164324	3	2
ENSMUSG00000037643	3	30995747	31052959	25	1
ENSMUSG00000037685	5	67618140	67847432	59	3
ENSMUSG00000037706	7	143052739	143067934	15	3
ENSMUSG00000037730	3	30602065	30619873	19	1
ENSMUSG00000037742 ENSMUSG00000076138	9	78478449	78489151	25	4
ENSMUSG00000037788	6	57727807	57825154	10	1
ENSMUSG00000037805	17	28328471	28331032	18	1
ENSMUSG00000037826	6	57506502	57535426	7	1
ENSMUSG00000037852	8	64592558	64693040	9	1
ENSMUSG00000037894	3	137864487	137866922	23	4
ENSMUSG00000037902	2	129592835	129632228	33	1
ENSMUSG00000037990	10	58813359	59138916	19	1
ENSMUSG00000037996	4	86983124	87230477	27	2
ENSMUSG00000038014	13	48879219	48968017	18	1
ENSMUSG00000038056	5	25271798	25498783	76	1
ENSMUSG00000038084	16	29579334	29654884	45	1
ENSMUSG00000038102	8	47490115	47533470	39	1
ENSMUSG00000038116	2	156196466	156309952	40	1
ENSMUSG00000038143	8	47180048	47352348	6	2
ENSMUSG00000038150	11	98581256	98587368	4	2
ENSMUSG00000038170 ENSMUSG00000098381	3	97689824	97888707	59	2
ENSMUSG00000038244	7	112225856	112355194	37	1
ENSMUSG00000038279	6	125131883	125144753	16	1
ENSMUSG00000038280	10	42583822	42702459	16	1
ENSMUSG00000038324	2	155634271	155692384	42	2
ENSMUSG00000038354	3	96670131	96691009	18	1
ENSMUSG00000038365	8	13907806	13940521	10	1
ENSMUSG00000038366	11	97799000	97838764	39	3
ENSMUSG00000038374	3	96629928	96633779	6	4
ENSMUSG00000038390	6	124858444	124863917	5	1
ENSMUSG00000038393	3	96557957	96561883	19	2
ENSMUSG00000038502	7	44863068	44869788	35	2
ENSMUSG00000038530	1	169741477	169747642	9	3
ENSMUSG00000038552	5	31292255	31295877	11	1
ENSMUSG00000038582	5	122284365	122324281	8	1
ENSMUSG00000038615	11	96817414	96829968	26	1
ENSMUSG00000038664	9	66350450	66508775	96	1
ENSMUSG00000038668	4	58435255	58553898	18	1
ENSMUSG00000038683	13	41001023	41013019	21	1
ENSMUSG00000038729 ENSMUSG00000090053 ENSMUSG00000089945	4	57434247	57896984	37	2
ENSMUSG00000038762	17	35956819	35969761	39	1
ENSMUSG00000038806	1	180851127	180868113	9	1
ENSMUSG00000038845	11	95666957	95680773	15	5
ENSMUSG00000038902	3	94837567	94882326	35	2
ENSMUSG00000038909	11	95274259	95310246	33	2
ENSMUSG00000038936	1	179668210	179687189	23	1
ENSMUSG00000038965	16	17152013	17202649	17	2
ENSMUSG00000038970	5	144100436	144188204	14	2
ENSMUSG00000039000	5	29569242	29676077	23	3
ENSMUSG00000039068	3	152395473	152462826	26	1
ENSMUSG00000039108	2	180024987	180035465	14	1
ENSMUSG00000039126	19	16956118	17223932	20	1
ENSMUSG00000039128	2	5794294	5845164	28	1
ENSMUSG00000039145	2	5293457	5714515	16	1
ENSMUSG00000039148	19	5377523	5388703	20	2
ENSMUSG00000039219	13	14063232	14199603	50	2
ENSMUSG00000039257	7	40899215	40930594	8	2
ENSMUSG00000039262	2	32151082	32234537	53	3
ENSMUSG00000039318	1	185204117	185286759	49	1
ENSMUSG00000039361	7	90130232	90209447	21	1
ENSMUSG00000039375	8	54629055	54887184	60	1
ENSMUSG00000039536	2	166947549	166996299	37	2
ENSMUSG00000039585	9	59750896	59928866	54	3
ENSMUSG00000039601	17	43801851	44039516	9	2
ENSMUSG00000039621	2	166566342	166713832	55	3
ENSMUSG00000039630 ENSMUSG00000100725 ENSMUSG00000089788	1	178321108	178337797	34	1
ENSMUSG00000039714	9	57600019	57606281	3	1
ENSMUSG00000039716 ENSMUSG00000092963	9	106892825	107231909	78	4
ENSMUSG00000039737	5	136178127	136198963	15	1
ENSMUSG00000039840	18	77938467	78035027	44	1
ENSMUSG00000039852	4	150281646	150621966	37	1
ENSMUSG00000039943	2	135659011	136014593	65	5
ENSMUSG00000040037	3	156561794	157316445	15	3
ENSMUSG00000040040	14	57424062	57517936	35	1
ENSMUSG00000040054	10	128092783	128129303	31	1
ENSMUSG00000040118	5	15934691	16374511	48	4
ENSMUSG00000040242	6	146577203	146599198	14	3
ENSMUSG00000040249	10	127538161	127621148	111	6
ENSMUSG00000040263	8	121796313	121829569	28	1
ENSMUSG00000040276	17	27655509	27711106	19	2
ENSMUSG00000040289	3	8663359	8667256	13	1
ENSMUSG00000040354	10	127296221	127311786	32	1
ENSMUSG00000040365	11	48806404	48817353	15	2
ENSMUSG00000040389	3	108591279	108645719	27	1
ENSMUSG00000040390	7	27656375	27674598	20	1
ENSMUSG00000040407	5	3928054	4080209	72	2
ENSMUSG00000040447	11	72451638	72489904	26	1
ENSMUSG00000040452	15	21111452	21589533	12	1
ENSMUSG00000040455	4	21767156	21837872	32	1
ENSMUSG00000040536	4	14952245	15149794	18	1
ENSMUSG00000040537	5	8072352	8368160	49	6
ENSMUSG00000040560	18	63708695	63989760	28	1
ENSMUSG00000040591	2	91275068	91444704	24	1
ENSMUSG00000040606	4	142102390	142239401	31	1
ENSMUSG00000040640	14	27622442	28478537	16	1
ENSMUSG00000040687	2	91137360	91183837	81	1
ENSMUSG00000040712	11	70669463	70688105	35	1
ENSMUSG00000040720	4	11485958	11550684	27	1
ENSMUSG00000040722	9	57441328	57468024	7	1
ENSMUSG00000040724	3	107101567	107106879	3	1
ENSMUSG00000040725	7	25721498	25754730	17	1
ENSMUSG00000040738	4	11199158	11254258	41	2
ENSMUSG00000040746	11	70647235	70651421	34	1
ENSMUSG00000040785	16	94370618	94469222	101	17
ENSMUSG00000040797	6	121372933	121473678	18	1
ENSMUSG00000040811 ENSMUSG00000065543	7	19176421	19206482	42	1
ENSMUSG00000040824	7	19149722	19152735	3	1
ENSMUSG00000040848	1	165174337	165194438	13	1
ENSMUSG00000040896	3	105452330	105674002	19	1
ENSMUSG00000040907	7	24978167	25005957	31	1
ENSMUSG00000041028	14	37120444	37135322	10	1
ENSMUSG00000041035	19	45560615	45579763	9	1
ENSMUSG00000041040	1	59913006	59985346	13	1
ENSMUSG00000041229	X	151520672	151633859	37	2
ENSMUSG00000041236	13	18717292	18866809	29	7
ENSMUSG00000041263	3	89083981	89093363	12	3
ENSMUSG00000041268	9	54365158	54501760	65	2
ENSMUSG00000041341	12	105613539	105685241	42	1
ENSMUSG00000041351	4	137664726	137729861	52	1
ENSMUSG00000041375	7	16274042	16286795	49	1
ENSMUSG00000041571	7	15917208	15922402	6	1
ENSMUSG00000041609	5	115648175	115731621	28	1
ENSMUSG00000041638 ENSMUSG00000099047	5	115565254	115622656	86	3
ENSMUSG00000041747	13	98246845	98262992	13	1
ENSMUSG00000041757	1	133181321	133303435	47	2
ENSMUSG00000041762	2	73341506	73386572	32	1
ENSMUSG00000041966	2	71055328	71099142	33	1
ENSMUSG00000041986	9	53911460	53975301	12	1
ENSMUSG00000041997	2	70712407	70825728	32	1
ENSMUSG00000042043	13	94788943	94842899	4	1
ENSMUSG00000042055	7	129591863	129635738	47	1
ENSMUSG00000042063	12	116047724	116063360	10	1
ENSMUSG00000042066	1	132356315	132391281	15	1
ENSMUSG00000042111 ENSMUSG00000101711	1	34436670	34444730	10	1
ENSMUSG00000042133	2	69722545	69754012	39	1
ENSMUSG00000042203 ENSMUSG00000099329 ENSMUSG00000098374 ENSMUSG00000090083 ENSMUSG00000024019	17	29549788	29705979	82	3
ENSMUSG00000042207	1	134560171	134635285	40	1
ENSMUSG00000042350	12	84918148	84970900	36	2
ENSMUSG00000042369	2	76369984	76383768	10	1
ENSMUSG00000042406	15	80255184	80257540	3	1
ENSMUSG00000042453	5	21884454	22344702	83	1
ENSMUSG00000042500	4	126489541	126533472	20	1
ENSMUSG00000042520	3	89999589	90052475	33	1
ENSMUSG00000042524	15	79724070	79742536	35	1
ENSMUSG00000042589 ENSMUSG00000103429	5	121858387	122050102	45	1
ENSMUSG00000042604	2	107290639	107298502	4	1
ENSMUSG00000042650	11	60536381	60558512	6	1
ENSMUSG00000042744	5	121220219	121368577	89	2
ENSMUSG00000042751	1	152954993	153119261	24	1
ENSMUSG00000042772	1	152836995	152902646	36	1
ENSMUSG00000042846	10	63928472	64090277	10	4
ENSMUSG00000043079	18	60593973	60660142	31	1
ENSMUSG00000043241	2	5951469	6056703	29	2
ENSMUSG00000043279	5	137105644	137116209	6	1
ENSMUSG00000043311	17	35126373	35128855	5	1
ENSMUSG00000043411	4	137593755	137658537	65	2
ENSMUSG00000043535	2	29124181	29182471	36	3
ENSMUSG00000043542	3	7503483	7553836	13	1
ENSMUSG00000043866	7	105739393	105744361	12	1
ENSMUSG00000043909	2	121193281	121271407	67	1
ENSMUSG00000043962	4	126164082	126202760	54	1
ENSMUSG00000044060 ENSMUSG00000089798	5	107497378	107580596	41	6
ENSMUSG00000044252	18	12755314	12941841	60	5
ENSMUSG00000044288	4	33924593	33948831	7	1
ENSMUSG00000044308	2	69897246	70024013	61	1
ENSMUSG00000044477	17	30005087	30210019	5	1
ENSMUSG00000044627	2	32278816	32288075	15	1
ENSMUSG00000044667	3	117319145	117360876	9	1
ENSMUSG00000044715	12	105685352	105703047	3	2
ENSMUSG00000044768	1	97606318	97662074	7	1
ENSMUSG00000044864	3	38449261	38484844	12	1
ENSMUSG00000044933	15	78537015	78544345	3	1
ENSMUSG00000045038	17	86167785	86657919	26	1
ENSMUSG00000045039	7	25317164	25365917	43	3
ENSMUSG00000045103	X	82948870	85206141	105	5
ENSMUSG00000045128	8	70894722	70897443	5	1
ENSMUSG00000045136	13	34127008	34130354	4	3
ENSMUSG00000045180	X	152609509	152769465	23	1
ENSMUSG00000045348	5	137730883	137741607	12	1
ENSMUSG00000045374	11	75440944	75454717	16	1
ENSMUSG00000045482	5	144768092	144859778	91	1
ENSMUSG00000045576	3	104864503	104927894	30	2
ENSMUSG00000045962	6	119923969	120038672	74	1
ENSMUSG00000045967	2	21367542	21830547	13	1
ENSMUSG00000045983	16	20668313	20692884	75	2
ENSMUSG00000045999	17	39847526	39848829	9	4
ENSMUSG00000046159	13	9875486	10360844	9	1
ENSMUSG00000046432	X	136270253	136271978	10	2
ENSMUSG00000046603	9	122805539	122836334	17	1
ENSMUSG00000046605	11	121616197	121673153	14	1
ENSMUSG00000046671	4	134525550	134535387	24	1
ENSMUSG00000046753	14	27482412	27508460	18	1
ENSMUSG00000046876	13	45549758	45964991	9	5
ENSMUSG00000047030	2	167481133	167492887	16	2
ENSMUSG00000047155	4	115106323	115134281	14	1
ENSMUSG00000047414	12	95692226	95785215	4	1
ENSMUSG00000047454	12	78226655	78684767	25	1
ENSMUSG00000047495	8	14095865	14847680	30	1
ENSMUSG00000047766	9	60568859	60688158	34	1
ENSMUSG00000047842	13	52504375	52530836	2	2
ENSMUSG00000047879	18	9995432	10045119	30	2
ENSMUSG00000048000	1	87326998	87450796	75	3
ENSMUSG00000048076	11	59211412	59228270	7	2
ENSMUSG00000048249	17	26715650	26776635	20	3
ENSMUSG00000048271	5	28317121	28419244	31	1
ENSMUSG00000048458	3	105704599	105720842	4	1
ENSMUSG00000048537	9	44686304	44735198	54	1
ENSMUSG00000049076	16	31092413	31201238	23	1
ENSMUSG00000049097	3	96596636	96599775	2	2
ENSMUSG00000049100	3	45378398	45435623	14	2
ENSMUSG00000049313	9	41964720	42124297	54	4
ENSMUSG00000049327	5	124439930	124462308	24	2
ENSMUSG00000049336	11	36006656	37235964	44	3
ENSMUSG00000049470	11	53350833	53421830	35	2
ENSMUSG00000049517	13	90923131	90924942	4	2
ENSMUSG00000049550	5	123577795	123684618	50	4
ENSMUSG00000049583	7	87602544	88134907	12	1
ENSMUSG00000049658	13	100017994	100104070	54	2
ENSMUSG00000049659	11	20685084	20741589	26	1
ENSMUSG00000049734 ENSMUSG00000025646	9	109057933	109074124	41	2
ENSMUSG00000049940	3	41066326	41083046	5	1
ENSMUSG00000049957	11	120458115	120464358	29	1
ENSMUSG00000050002	13	58157649	58164693	5	1
ENSMUSG00000050043 ENSMUSG00000101645 ENSMUSG00000034101	2	84600071	84679140	65	2
ENSMUSG00000050272	16	96592079	97170752	33	1
ENSMUSG00000050310	15	6708381	6800398	38	1
ENSMUSG00000050334 ENSMUSG00000065424	13	83721381	83884194	16	2
ENSMUSG00000050379	X	36911326	36991794	18	1
ENSMUSG00000050587	2	96318169	97631666	14	1
ENSMUSG00000050627	9	114899341	114933987	14	1
ENSMUSG00000050663	10	114398823	114802307	23	1
ENSMUSG00000050812	4	58798911	58912749	70	5
ENSMUSG00000050821	16	20693282	20703048	13	1
ENSMUSG00000050840	1	104768529	104995481	12	1
ENSMUSG00000050890	4	134275002	134287895	13	1
ENSMUSG00000051177	2	134786159	135475258	41	3
ENSMUSG00000051223	1	58392898	58407353	18	1
ENSMUSG00000051579	X	136168984	136172342	11	1
ENSMUSG00000051890	12	69241176	69284632	20	3
ENSMUSG00000051920	15	43020811	43170818	6	1
ENSMUSG00000052026	18	60995381	61014199	14	1
ENSMUSG00000052087	13	55369732	55384687	19	1
ENSMUSG00000052105	17	66336982	66449750	38	2
ENSMUSG00000052139 ENSMUSG00000029142	5	31596935	32084962	70	6
ENSMUSG00000052305	7	103826534	103828096	9	1
ENSMUSG00000052336	9	119901616	120068283	5	1
ENSMUSG00000052459	16	44085402	44139705	28	1
ENSMUSG00000052488	8	72460489	72475233	18	1
ENSMUSG00000052516	16	73892306	74411825	47	2
ENSMUSG00000052698	9	67217087	67559703	60	1
ENSMUSG00000052727	13	99421464	99516602	7	3
ENSMUSG00000052889	7	122288751	122634402	26	6
ENSMUSG00000052949	11	116336353	116413032	37	1
ENSMUSG00000053024	1	132509427	132543256	39	1
ENSMUSG00000053025	7	75114897	75309262	14	2
ENSMUSG00000053141	2	161521990	162661147	40	3
ENSMUSG00000053253	14	105258573	105309298	22	4
ENSMUSG00000053310	9	37544492	37552904	7	3
ENSMUSG00000053398	3	98313170	98339990	18	2
ENSMUSG00000053477	18	69344146	69687967	48	4
ENSMUSG00000053510 ENSMUSG00000076444	4	109000655	109061777	57	1
ENSMUSG00000053641	9	64811340	64919667	34	3
ENSMUSG00000053877	7	127511983	127567054	71	1
ENSMUSG00000054280 ENSMUSG00000023452 ENSMUSG00000093574	5	32736301	32854256	43	4
ENSMUSG00000054387	1	132959484	133030561	41	1
ENSMUSG00000054405	4	132535550	132553742	34	1
ENSMUSG00000054423	14	12372563	12823079	38	2
ENSMUSG00000054679	4	33208991	33233340	7	1
ENSMUSG00000054814	5	73998463	74068430	19	1
ENSMUSG00000054934	10	116417861	116473878	9	1
ENSMUSG00000055013	1	89454806	89897617	25	1
ENSMUSG00000055204	5	90227190	90366185	36	1
ENSMUSG00000055254	13	58806596	59133970	20	2
ENSMUSG00000055421	14	93013410	93890679	21	2
ENSMUSG00000055681	8	70302518	70312993	24	1
ENSMUSG00000055692	16	17276300	17283229	38	1
ENSMUSG00000055720	9	57910986	57929968	11	1
ENSMUSG00000055762	15	75894796	75909556	40	1
ENSMUSG00000055932	8	91313532	91668439	22	5
ENSMUSG00000056004	5	9266118	9481825	38	1
ENSMUSG00000056050	1	183326725	183369553	36	1
ENSMUSG00000056073	10	49099460	49788766	31	2
ENSMUSG00000056185	19	5495278	5510489	13	1
ENSMUSG00000056211	1	128103301	128237736	56	2
ENSMUSG00000056258	15	65986387	66286224	19	1
ENSMUSG00000056342	11	23306895	23490560	93	2
ENSMUSG00000056427	11	35121224	35708507	41	1
ENSMUSG00000056553	12	116485720	117276849	32	1
ENSMUSG00000056629	19	6977741	6980461	8	2
ENSMUSG00000056755	6	110645581	111567230	19	1
ENSMUSG00000057230	6	86849517	86991864	26	1
ENSMUSG00000057236	4	129307100	129335370	21	1
ENSMUSG00000057322	11	114668524	114672331	11	3
ENSMUSG00000057406	5	33820725	33897975	41	1
ENSMUSG00000057506	19	44139266	44146446	5	1
ENSMUSG00000057666	6	125161715	125166467	37	16
ENSMUSG00000057738	2	29965560	30031451	83	3
ENSMUSG00000057788	8	70292866	70302489	22	1
ENSMUSG00000057897	11	5969644	6066362	50	3
ENSMUSG00000058006	4	32657119	32775217	125	1
ENSMUSG00000058013	5	93093457	93174958	10	2
ENSMUSG00000058152	18	59175401	59410446	3	1
ENSMUSG00000058239	7	30945252	30956803	24	1
ENSMUSG00000058248	1	192190774	192510159	14	1
ENSMUSG00000058254	X	10485158	10596605	10	3
ENSMUSG00000058297	10	60106219	60135198	15	1
ENSMUSG00000058317	14	18573575	18894267	32	1
ENSMUSG00000058318	2	92093117	92364666	65	2
ENSMUSG00000058325	7	134670687	135173639	52	1
ENSMUSG00000058546 ENSMUSG00000065676	11	78180932	78183584	11	1
ENSMUSG00000058587	9	75497796	75559657	10	1
ENSMUSG00000058589	10	89873509	90973300	95	2
ENSMUSG00000058594	2	11742573	11777582	43	2
ENSMUSG00000058600 ENSMUSG00000065899	15	34440505	34443640	18	1
ENSMUSG00000058624	19	21391307	21473445	18	1
ENSMUSG00000058756	11	98740638	98769006	27	1
ENSMUSG00000058793	2	132263148	132312050	22	1
ENSMUSG00000058835	2	22940073	23040241	36	3
ENSMUSG00000059005 ENSMUSG00000093242	2	75659244	75669407	25	3
ENSMUSG00000059119	7	143513579	143549090	16	1
ENSMUSG00000059146	7	78192362	78578408	29	1
ENSMUSG00000059149	1	132022806	132068062	35	1
ENSMUSG00000059173	2	79834453	80129458	35	1
ENSMUSG00000059248	11	117199661	117362325	30	1
ENSMUSG00000059263	7	112023506	112111386	28	1
ENSMUSG00000059273	7	16401196	16437694	14	2
ENSMUSG00000059291	4	136028265	136053428	27	2
ENSMUSG00000059409	17	46682991	46705002	15	1
ENSMUSG00000059714	17	35823230	35832791	35	2
ENSMUSG00000059742	2	62693414	63184287	22	2
ENSMUSG00000059923	11	115644045	115708597	13	1
ENSMUSG00000059970	12	76404176	76406934	2	1
ENSMUSG00000059974	9	28994750	29963141	29	1
ENSMUSG00000059981	7	126865678	126884703	24	1
ENSMUSG00000059995	11	102289300	102296631	21	3
ENSMUSG00000060126	14	75845093	75848525	23	1
ENSMUSG00000060147	13	33917918	34002794	42	7
ENSMUSG00000060261	5	134237834	134314760	79	2
ENSMUSG00000060301	10	79064374	79097600	6	1
ENSMUSG00000060450	18	38296635	38317847	11	1
ENSMUSG00000060675	19	7557459	7588545	12	1
ENSMUSG00000060743	1	180800832	180813943	18	2
ENSMUSG00000060882	6	21215503	21729805	6	2
ENSMUSG00000060938	11	68901583	68906989	15	3
ENSMUSG00000061130	17	84956741	85023991	11	2
ENSMUSG00000061244	14	49012146	49066653	30	1
ENSMUSG00000061288	5	117120129	117275219	38	1
ENSMUSG00000061306	11	120103960	120151346	48	1
ENSMUSG00000061601	5	14514918	14860184	34	3
ENSMUSG00000061603	12	52699383	53151015	14	5
ENSMUSG00000061751	16	33974258	34573532	101	1
ENSMUSG00000061787	7	81342732	81345254	14	1
ENSMUSG00000061904	10	91116574	91124059	29	1
ENSMUSG00000062078	17	10206471	10319361	10	1
ENSMUSG00000062234	5	108569411	108629739	40	3
ENSMUSG00000062270	9	90091665	90114774	37	1
ENSMUSG00000062296	9	111311739	111395774	22	2
ENSMUSG00000062328	18	75000477	75003381	7	1
ENSMUSG00000062580	1	135295213	135313778	12	1
ENSMUSG00000062604	5	23503356	23616571	15	1
ENSMUSG00000062761	5	31452436	31481749	14	1
ENSMUSG00000062762	9	36779159	36797361	27	4
ENSMUSG00000062949	X	60223290	60592698	36	1
ENSMUSG00000062995	6	8630527	8778488	37	1
ENSMUSG00000062997	2	39001580	39005624	8	1
ENSMUSG00000063015	5	93181933	93206495	13	3
ENSMUSG00000063063	6	76881637	77979699	29	1
ENSMUSG00000063077	4	149176319	149307693	72	3
ENSMUSG00000063108	9	20432972	20460162	25	1
ENSMUSG00000063229	7	46841475	46855627	22	1
ENSMUSG00000063576	17	46674550	46680930	13	1
ENSMUSG00000063646	5	37028335	37148001	42	1
ENSMUSG00000063694	6	50562563	50566538	5	1
ENSMUSG00000063882	4	116066965	116075071	12	4
ENSMUSG00000063887	3	25426215	26332460	15	1
ENSMUSG00000064043	17	47140875	47361958	32	1
ENSMUSG00000064302	1	118389058	118612678	72	1
ENSMUSG00000064329	2	66270781	66440840	43	1
ENSMUSG00000064453 ENSMUSG00000058558	5	107900502	107909005	22	5
ENSMUSG00000064725 ENSMUSG00000020372 ENSMUSG00000064500 ENSMUSG00000064780	11	48800332	48806434	29	6
ENSMUSG00000064829 ENSMUSG00000065295 ENSMUSG00000062647	2	26910764	26913318	23	9
ENSMUSG00000064966 ENSMUSG00000030744	7	99477896	99483738	21	1
ENSMUSG00000065452 ENSMUSG00000028410	4	40722150	40737149	32	3
ENSMUSG00000066392	12	88722876	90334935	50	4
ENSMUSG00000066441	12	79174337	79192293	11	4
ENSMUSG00000066456	9	83109948	83146685	24	5
ENSMUSG00000066551	5	149046702	149053513	24	3
ENSMUSG00000066705	9	45370185	45396158	8	1
ENSMUSG00000066877	1	43444579	43570515	12	1
ENSMUSG00000067274	5	115559467	115563727	14	2
ENSMUSG00000067365	5	38260185	38269622	12	1
ENSMUSG00000067787	2	157556362	157571274	12	1
ENSMUSG00000067847	2	156144039	156145797	11	1
ENSMUSG00000067879	1	9601199	9627143	6	1
ENSMUSG00000067889	19	4711208	4752353	37	1
ENSMUSG00000068206 ENSMUSG00000091135	15	79229173	79256674	41	1
ENSMUSG00000068373	2	104143073	104410334	36	1
ENSMUSG00000068732	3	108556425	108562466	4	1
ENSMUSG00000068798	3	105727267	105801330	8	3
ENSMUSG00000069020	2	29820075	29845002	16	1
ENSMUSG00000069094	3	19223108	19311322	33	1
ENSMUSG00000069171	13	78188973	78199757	12	1
ENSMUSG00000069601	10	69533772	70027438	128	4
ENSMUSG00000069769	11	88339382	88718513	27	1
ENSMUSG00000070000	8	71708387	71725716	56	2
ENSMUSG00000070047	8	44935447	45052257	37	1
ENSMUSG00000070319	9	20894352	20898600	11	4
ENSMUSG00000070461 ENSMUSG00000016356	2	180983924	181017540	45	1
ENSMUSG00000070493	5	129881156	129887470	7	1
ENSMUSG00000070498	5	125531774	125792583	13	1
ENSMUSG00000070544	2	160645888	160722764	31	1
ENSMUSG00000070565	1	157135182	157412595	28	3
ENSMUSG00000070730	2	119137001	119157034	28	2
ENSMUSG00000071054	17	56584825	56606294	51	2
ENSMUSG00000071072	10	128058954	128077272	12	1
ENSMUSG00000071172	17	29032673	29043366	16	2
ENSMUSG00000071415	11	97777527	97782437	16	1
ENSMUSG00000071528	19	47083471	47090625	4	2
ENSMUSG00000071533	16	56007245	56029739	20	8
ENSMUSG00000071655	19	8871559	8875663	12	1
ENSMUSG00000071657	19	8837467	8848683	29	1
ENSMUSG00000071658	19	8836929	8839246	3	1
ENSMUSG00000071723	X	94636069	94643244	8	1
ENSMUSG00000071866	11	6415443	6419817	15	4
ENSMUSG00000072235	15	98949841	98953551	11	1
ENSMUSG00000072825	12	112722174	112746591	27	3
ENSMUSG00000073174 ENSMUSG00000040003	5	19227046	20706052	34	1
ENSMUSG00000073557	1	134754658	134955942	48	1
ENSMUSG00000074280	9	57483913	57484585	2	1
ENSMUSG00000074657	10	127225696	127263363	29	3
ENSMUSG00000074698	2	152226839	152281852	22	2
ENSMUSG00000074968	2	110655201	110950923	30	1
ENSMUSG00000075318	2	65620857	65767447	33	1
ENSMUSG00000075376	2	37370069	37422903	36	2
ENSMUSG00000075415	2	31026206	31142008	44	1
ENSMUSG00000075467	2	26348121	26352110	4	1
ENSMUSG00000077185 ENSMUSG00000077564 ENSMUSG00000041453	5	146832890	146837032	20	11
ENSMUSG00000077220 ENSMUSG00000065160 ENSMUSG00000065228 ENSMUSG00000064440 ENSMUSG00000053332 ENSMUSG00000064968 ENSMUSG00000084667 ENSMUSG00000065735 ENSMUSG00000064816 ENSMUSG00000080463	1	161034422	161038539	73	3
ENSMUSG00000077221 ENSMUSG00000040549	2	91526762	91620664	62	6
ENSMUSG00000077358 ENSMUSG00000026020	1	59684971	59719044	54	5
ENSMUSG00000077450	17	33742484	33760530	17	8
ENSMUSG00000077709 ENSMUSG00000044533	17	24718116	24721929	25	1
ENSMUSG00000078490	4	155409190	155466823	60	1
ENSMUSG00000078517 ENSMUSG00000066036	4	139352587	139489588	156	1
ENSMUSG00000078566	7	138890836	138909519	14	7
ENSMUSG00000078656 ENSMUSG00000001240	11	101246028	101259549	41	1
ENSMUSG00000078868	2	177314520	177324307	4	1
ENSMUSG00000078870	2	177183453	177206421	9	1
ENSMUSG00000078878 ENSMUSG00000078879	2	176670522	176721813	20	4
ENSMUSG00000078931 ENSMUSG00000031916	8	107044698	107056689	20	1
ENSMUSG00000079076 ENSMUSG00000021066	12	69893105	69969721	19	2
ENSMUSG00000079415 ENSMUSG00000024695	19	12763660	12796126	18	1
ENSMUSG00000079487 ENSMUSG00000031302 ENSMUSG00000096056	X	101274030	101325963	85	3
ENSMUSG00000079523	6	72957347	72958748	10	1
ENSMUSG00000079598	6	38663069	38680864	5	1
ENSMUSG00000080441 ENSMUSG00000036046	15	84943936	84988551	19	1
ENSMUSG00000080473 ENSMUSG00000002748	5	135187264	135246129	28	4
ENSMUSG00000080527 ENSMUSG00000055024	15	81585351	81652072	43	1
ENSMUSG00000081375 ENSMUSG00000001964	X	74254687	74261548	19	1
ENSMUSG00000083844	11	5762129	5784710	17	1
ENSMUSG00000084516 ENSMUSG00000027177	2	104426481	104494446	26	1
ENSMUSG00000084899 ENSMUSG00000020048 ENSMUSG00000092686	10	86690209	86705509	32	3
ENSMUSG00000085334 ENSMUSG00000028820	4	127021324	127049398	30	1
ENSMUSG00000086158	9	72979722	72985382	4	1
ENSMUSG00000086496	2	158595472	158610723	11	1
ENSMUSG00000086873 ENSMUSG00000025855	5	139017306	139150693	34	2
ENSMUSG00000086992 ENSMUSG00000051359	15	37366175	37792570	45	1
ENSMUSG00000087687	8	3621551	3624231	4	1
ENSMUSG00000088219 ENSMUSG00000060036	15	80077794	80091868	23	2
ENSMUSG00000088696 ENSMUSG00000028959	5	24438440	24445287	43	1
ENSMUSG00000089989 ENSMUSG00000065878 ENSMUSG00000065628 ENSMUSG00000065219 ENSMUSG00000074129	7	45125558	45136432	66	3
ENSMUSG00000090000 ENSMUSG00000025421	18	76930017	76972902	33	1
ENSMUSG00000090100 ENSMUSG00000027284	2	120716154	120850604	84	1
ENSMUSG00000090137 ENSMUSG00000055553	8	70508263	70527956	41	3
ENSMUSG00000090213 ENSMUSG00000089739 ENSMUSG00000078923	2	167607638	167689822	33	9
ENSMUSG00000090223 ENSMUSG00000000159	16	96361668	96525793	21	1
ENSMUSG00000090639 ENSMUSG00000032553 ENSMUSG00000032554	9	103188032	103230444	55	2
ENSMUSG00000091471 ENSMUSG00000025204 ENSMUSG00000051984	19	44516957	44555440	54	3
ENSMUSG00000091537	9	109074568	109082587	10	2
ENSMUSG00000092310 ENSMUSG00000092622 ENSMUSG00000032215	9	73101836	73123333	29	1
ENSMUSG00000092541 ENSMUSG00000032423 ENSMUSG00000032422	9	88376750	88482574	86	3
ENSMUSG00000092896 ENSMUSG00000025892	9	4417899	4796234	21	2
ENSMUSG00000093219 ENSMUSG00000025261	X	151800807	151935417	135	7
ENSMUSG00000093483	11	83291699	83294632	14	5
ENSMUSG00000093752 ENSMUSG00000078919 ENSMUSG00000051149	2	168180986	168230591	39	1
ENSMUSG00000093904	8	126930664	126945921	5	1
ENSMUSG00000093938 ENSMUSG00000070354 ENSMUSG00000078771	11	79513385	79530609	19	1
ENSMUSG00000095041	JH584304.1	52190	59690	11	2
ENSMUSG00000095118 ENSMUSG00000064791 ENSMUSG00000096263 ENSMUSG00000015656	9	40800984	40805200	42	10
ENSMUSG00000095567	4	156236010	156247616	22	2
ENSMUSG00000096764 ENSMUSG00000027130 ENSMUSG00000027132	2	112265825	112414240	57	1
ENSMUSG00000096780	17	6438524	6467022	24	2
ENSMUSG00000097767 ENSMUSG00000099235 ENSMUSG00000099010 ENSMUSG00000098599 ENSMUSG00000098395	5	112213228	112229395	30	1
ENSMUSG00000097971	17	39843013	39846341	5	1
ENSMUSG00000098371 ENSMUSG00000022601 ENSMUSG00000098274	16	55966275	56008913	26	2
ENSMUSG00000098460 ENSMUSG00000040356	17	34839228	34850210	55	1
ENSMUSG00000098597 ENSMUSG00000029713 ENSMUSG00000029711	5	137483020	137533510	53	1
ENSMUSG00000098606 ENSMUSG00000026463	1	133699457	133801041	38	8
ENSMUSG00000098617 ENSMUSG00000021268 ENSMUSG00000076451 ENSMUSG00000084535	12	109541001	109571726	41	1
ENSMUSG00000098652 ENSMUSG00000060657	16	14109166	14159274	29	4
ENSMUSG00000098953 ENSMUSG00000049252	2	40595248	42653598	108	3
ENSMUSG00000098955 ENSMUSG00000062825 ENSMUSG00000093264	11	120345690	120348542	32	1
ENSMUSG00000099024 ENSMUSG00000024498	18	42511510	42575551	27	1
ENSMUSG00000100252 ENSMUSG00000093073	3	17789921	17808970	18	1
ENSMUSG00000102627 ENSMUSG00000095100 ENSMUSG00000089375 ENSMUSG00000102252 ENSMUSG00000100826 ENSMUSG00000094890 ENSMUSG00000000948 ENSMUSG00000077191	7	59307924	60140219	114	11
ENSMUSG00000102752 ENSMUSG00000038473	1	170298199	170589861	30	1
ENSMUSG00000102869	2	156391831	156392979	3	2
ENSMUSG00000103623 ENSMUSG00000052613	10	73099342	74649737	92	1
ENSMUSG00000103910 ENSMUSG00000030213	6	136518802	136611038	35	1
ENSMUSG00000104063 ENSMUSG00000103472 ENSMUSG00000102828 ENSMUSG00000103770 ENSMUSG00000103677 ENSMUSG00000103458 ENSMUSG00000103144 ENSMUSG00000102836 ENSMUSG00000103255 ENSMUSG00000103793 ENSMUSG00000104318 ENSMUSG00000104252 ENSMUSG00000103567 ENSMUSG00000102697 ENSMUSG00000103092 ENSMUSG00000023036 ENSMUSG00000103800 ENSMUSG00000102748 ENSMUSG00000103601 ENSMUSG00000103585 ENSMUSG00000103442 …	18	36930184	37841873	126	2

## Sheet: CONstim_exGFstim
geneID	chr	start	end	total_exons	exon_changes
ENSMUSG00000000001	3	108107280	108146146	9	3
ENSMUSG00000000078	13	5861489	5870393	4	3
ENSMUSG00000000126	11	59306928	59333552	7	1
ENSMUSG00000000127	17	63896018	64139494	22	1
ENSMUSG00000000134	X	7762560	7775202	39	2
ENSMUSG00000000168	9	50634633	50659780	24	1
ENSMUSG00000000197	14	123276641	123627144	44	2
ENSMUSG00000000223	X	134404551	134456573	37	1
ENSMUSG00000000247	2	38339281	38369733	18	1
ENSMUSG00000000276	11	89035179	89066850	17	2
ENSMUSG00000000308	2	121357714	121363737	30	3
ENSMUSG00000000339	3	116488963	116508208	20	1
ENSMUSG00000000346	15	100615628	100620731	4	2
ENSMUSG00000000355	X	38600578	38613426	13	1
ENSMUSG00000000374	10	78186725	78244642	23	3
ENSMUSG00000000416	6	18366478	18514869	42	1
ENSMUSG00000000420	18	24205344	24286818	28	2
ENSMUSG00000000439	6	115601938	115618670	8	2
ENSMUSG00000000581	11	17257579	17269176	14	1
ENSMUSG00000000605	7	7282316	7299511	13	1
ENSMUSG00000000631	11	77763246	77865980	90	4
ENSMUSG00000000711	10	128677193	128696268	6	2
ENSMUSG00000000738	8	123062942	123097760	42	6
ENSMUSG00000000743	8	123204264	123212763	12	1
ENSMUSG00000000751	11	75298166	75348324	27	2
ENSMUSG00000000787	X	13280970	13294052	29	5
ENSMUSG00000000804	11	84984442	85140161	50	4
ENSMUSG00000000826	2	181520485	181555133	20	2
ENSMUSG00000000838 ENSMUSG00000098736	X	68678485	68717963	37	3
ENSMUSG00000000861	11	24078056	24174123	16	2
ENSMUSG00000000881	X	100767722	100818410	34	6
ENSMUSG00000000915	5	123973628	124003211	46	2
ENSMUSG00000000959	14	54360841	54369669	10	2
ENSMUSG00000001016	3	90476201	90488379	14	1
ENSMUSG00000001017	3	90498956	90509498	24	2
ENSMUSG00000001018	3	90488026	90491033	13	1
ENSMUSG00000001036	11	61517249	61579687	33	3
ENSMUSG00000001053	11	51643063	51650842	11	1
ENSMUSG00000001098	5	114363567	114380515	20	3
ENSMUSG00000001105	11	78536361	78541737	16	8
ENSMUSG00000001119	10	76708792	76726168	38	9
ENSMUSG00000001120	10	76761857	76961887	36	4
ENSMUSG00000001127	X	20797814	20860519	41	1
ENSMUSG00000001150	10	76468971	76515856	29	1
ENSMUSG00000001158	6	86675221	86684522	12	3
ENSMUSG00000001175	12	100199435	100209806	11	7
ENSMUSG00000001211	10	78269178	78352489	30	1
ENSMUSG00000001227	17	56123085	56140343	18	1
ENSMUSG00000001248	7	31130127	31155896	36	1
ENSMUSG00000001260	5	70751047	70842617	9	1
ENSMUSG00000001270	12	111669355	111672338	8	3
ENSMUSG00000001289 ENSMUSG00000001285	15	102326116	102338139	47	1
ENSMUSG00000001300	8	8617434	8660773	7	1
ENSMUSG00000001366	9	78081499	78109065	25	5
ENSMUSG00000001376	6	3498382	3603319	49	3
ENSMUSG00000001380	18	36766530	36783205	13	1
ENSMUSG00000001416	3	88297116	88321767	36	3
ENSMUSG00000001424	6	28475139	28935162	44	1
ENSMUSG00000001440	11	97159714	97187881	27	2
ENSMUSG00000001467	5	4081145	4104746	17	3
ENSMUSG00000001472	8	123373824	123404173	20	12
ENSMUSG00000001525	17	35833921	35838306	12	1
ENSMUSG00000001542	13	75707484	75772356	12	2
ENSMUSG00000001627	12	40201567	40248504	32	5
ENSMUSG00000001687	5	148504631	148552789	11	1
ENSMUSG00000001707	13	38645698	38659028	4	1
ENSMUSG00000001729	12	112653821	112674884	32	1
ENSMUSG00000001767	2	145917479	145935014	18	3
ENSMUSG00000001774	9	18292267	18314000	11	5
ENSMUSG00000001794	7	30186942	30195164	24	3
ENSMUSG00000001802	7	35200027	35215370	13	1
ENSMUSG00000001829	7	101663633	101790168	36	1
ENSMUSG00000001833	9	25252439	25308571	15	7
ENSMUSG00000001847	5	143505478	143528036	12	3
ENSMUSG00000001909	8	84686307	84699808	79	3
ENSMUSG00000001911	8	84699876	84800344	29	9
ENSMUSG00000002010	X	73778963	73786897	31	3
ENSMUSG00000002015	X	73686178	73716175	8	1
ENSMUSG00000002028	9	44803355	44881296	45	2
ENSMUSG00000002052	11	78206746	78245987	40	2
ENSMUSG00000002102	2	91054009	91066369	34	2
ENSMUSG00000002103	2	91202885	91214098	21	1
ENSMUSG00000002107	2	6539694	7509563	70	2
ENSMUSG00000002129	11	4160350	4182541	22	3
ENSMUSG00000002221	5	27740667	27791339	21	1
ENSMUSG00000002222	6	71388634	71440637	18	1
ENSMUSG00000002265	7	6703892	6730421	16	1
ENSMUSG00000002307	17	33909414	33915589	28	3
ENSMUSG00000002319 ENSMUSG00000002320	14	55625400	55643806	98	2
ENSMUSG00000002341	8	70093085	70120873	15	3
ENSMUSG00000002342	8	70172356	70183681	39	1
ENSMUSG00000002395	8	71366848	71369732	29	1
ENSMUSG00000002396	8	71371298	71379361	11	1
ENSMUSG00000002413	6	39603237	39725463	33	3
ENSMUSG00000002428	3	20057811	20118490	36	1
ENSMUSG00000002455	2	181591868	181655660	29	1
ENSMUSG00000002459	1	4909576	5070285	16	1
ENSMUSG00000002475	18	10644411	10706771	15	1
ENSMUSG00000002477	18	10617796	10628230	4	3
ENSMUSG00000002524	15	76070184	76080946	12	3
ENSMUSG00000002546	2	32287384	32307921	49	2
ENSMUSG00000002580	11	98437708	98438991	4	1
ENSMUSG00000002658	17	57003405	57011288	13	2
ENSMUSG00000002728	2	145902099	145916425	23	2
ENSMUSG00000002741	11	5955693	5967780	9	1
ENSMUSG00000002778	7	45872772	45883731	14	2
ENSMUSG00000002812	11	60714123	60727263	36	3
ENSMUSG00000002833	17	56079657	56100596	16	3
ENSMUSG00000002881	1	52457294	52500679	18	2
ENSMUSG00000002900	12	31265234	31329644	52	2
ENSMUSG00000002949	8	4259731	4275913	32	7
ENSMUSG00000002957	7	141562180	141633011	22	5
ENSMUSG00000003031	6	134920401	134925513	4	1
ENSMUSG00000003037	8	72161200	72183904	13	2
ENSMUSG00000003038	4	133964738	133968650	37	1
ENSMUSG00000003039	8	72219730	72223764	4	4
ENSMUSG00000003062	13	19357677	19395752	9	1
ENSMUSG00000003072	10	80138632	80145818	13	3
ENSMUSG00000003099	7	17004640	17027924	34	4
ENSMUSG00000003119	11	98203059	98278504	30	1
ENSMUSG00000003131	9	45965311	45984871	6	1
ENSMUSG00000003153	6	122727809	122801640	26	1
ENSMUSG00000003161	5	8046078	8069379	19	2
ENSMUSG00000003226	10	58446852	58494155	29	7
ENSMUSG00000003228	19	60889749	61092553	16	2
ENSMUSG00000003233	16	20516982	20532520	26	1
ENSMUSG00000003235	16	20498817	20509955	19	6
ENSMUSG00000003269	7	45806637	45814581	30	1
ENSMUSG00000003279	17	69969073	70821413	46	1
ENSMUSG00000003308	9	21229730	21239332	17	3
ENSMUSG00000003316	8	111154421	111259216	34	4
ENSMUSG00000003352	15	98632220	98644530	14	1
ENSMUSG00000003363	7	27532000	27553218	30	3
ENSMUSG00000003380	7	24969750	24972728	5	4
ENSMUSG00000003410	9	22015005	22052023	7	3
ENSMUSG00000003421	7	45062429	45078503	26	1
ENSMUSG00000003435	7	28314898	28338719	30	4
ENSMUSG00000003452	6	149408984	149563329	24	2
ENSMUSG00000003464	1	172126755	172136493	19	3
ENSMUSG00000003518	11	101971143	101987013	14	3
ENSMUSG00000003526	16	18060357	18090203	25	1
ENSMUSG00000003660	2	127208386	127240451	56	2
ENSMUSG00000003721	1	121304353	121332589	36	7
ENSMUSG00000003731	4	129643980	129672767	23	1
ENSMUSG00000003778	18	34598615	34624601	35	2
ENSMUSG00000003814	8	84841850	84846934	17	7
ENSMUSG00000003847	8	107293470	107379517	37	1
ENSMUSG00000003863	7	45339126	45367019	46	2
ENSMUSG00000003872	7	45367891	45370583	15	1
ENSMUSG00000003948	11	90187684	90278589	16	4
ENSMUSG00000003949	11	90336536	90390895	15	4
ENSMUSG00000003970	15	76904071	76906318	6	1
ENSMUSG00000003974	5	9485236	9725352	6	2
ENSMUSG00000004031	1	158245269	158356326	16	5
ENSMUSG00000004032	3	107895821	107898686	19	3
ENSMUSG00000004040	11	100885098	100939540	55	2
ENSMUSG00000004056	7	27591552	27640826	45	2
ENSMUSG00000004069 ENSMUSG00000039646	16	4639941	4707695	23	3
ENSMUSG00000004096	9	14500617	14510577	7	1
ENSMUSG00000004099	9	20907206	20959888	42	7
ENSMUSG00000004110	1	154390731	154884501	62	7
ENSMUSG00000004113	2	24603887	24763152	70	3
ENSMUSG00000004187	15	76660641	76668196	18	4
ENSMUSG00000004207	10	60277627	60302597	21	1
ENSMUSG00000004233	3	99141068	99239186	18	1
ENSMUSG00000004264 ENSMUSG00000088835	6	124712336	124716950	26	5
ENSMUSG00000004267	6	124760053	124769673	44	10
ENSMUSG00000004319	8	60910389	60983300	31	2
ENSMUSG00000004360	10	29211643	29230779	6	4
ENSMUSG00000004364	1	80264923	80340480	28	5
ENSMUSG00000004366	16	23889581	23890844	2	2
ENSMUSG00000004451	1	119470305	119504794	8	2
ENSMUSG00000004530	5	113842436	113908758	30	6
ENSMUSG00000004535	6	52713729	52766780	32	7
ENSMUSG00000004568	8	3393006	3456601	33	1
ENSMUSG00000004642	5	33634952	33652574	27	5
ENSMUSG00000004698	12	34371503	34528889	12	4
ENSMUSG00000004771	9	64715299	64737758	24	5
ENSMUSG00000004789	12	85110833	85134091	15	2
ENSMUSG00000004798	11	61775649	61855073	32	1
ENSMUSG00000004865	17	28587648	28622521	30	3
ENSMUSG00000004929	10	81070035	81082559	21	1
ENSMUSG00000004936	9	64185770	64253631	18	1
ENSMUSG00000004980	6	51460434	51469894	17	2
ENSMUSG00000005034	3	146729579	146812960	17	2
ENSMUSG00000005045	4	152338651	152390194	49	4
ENSMUSG00000005069	6	124396816	124415067	29	2
ENSMUSG00000005089	2	102658659	102790784	34	8
ENSMUSG00000005102	2	118388618	118475234	50	2
ENSMUSG00000005125	15	66929321	66969640	45	2
ENSMUSG00000005198	11	69733997	69758637	37	1
ENSMUSG00000005299	5	33739673	33782817	21	5
ENSMUSG00000005360	15	8634124	8710764	26	9
ENSMUSG00000005362	6	106778249	106800074	20	1
ENSMUSG00000005371	17	87990859	88065291	29	2
ENSMUSG00000005417	11	59661305	59780860	38	8
ENSMUSG00000005469	8	83972978	83996445	10	1
ENSMUSG00000005506	2	90940382	91019497	33	2
ENSMUSG00000005533	7	67952859	68226780	21	1
ENSMUSG00000005534	8	3150922	3279617	23	2
ENSMUSG00000005575	7	13035120	13038275	23	2
ENSMUSG00000005583	13	83504034	83667079	17	6
ENSMUSG00000005610 ENSMUSG00000088948	7	111070568	111083030	54	4
ENSMUSG00000005625	3	95032694	95042614	30	1
ENSMUSG00000005672	5	75574916	75656722	30	2
ENSMUSG00000005683	10	128337832	128362479	11	1
ENSMUSG00000005687	3	103171655	103179166	21	10
ENSMUSG00000005698	8	105636568	105682922	22	2
ENSMUSG00000005732	16	18239784	18248732	12	1
ENSMUSG00000005779	3	94884093	94886961	12	6
ENSMUSG00000005802	2	122681233	122702663	9	4
ENSMUSG00000005813	3	138458960	138489382	11	1
ENSMUSG00000005823	17	57234914	57247641	17	1
ENSMUSG00000005846	16	11192970	11203331	13	1
ENSMUSG00000005871	18	34220924	34322189	32	2
ENSMUSG00000005873	18	34344889	34373415	5	4
ENSMUSG00000005881	2	156008045	156018279	34	1
ENSMUSG00000005882	2	155846894	155930310	47	1
ENSMUSG00000005893	6	92091390	92173057	25	2
ENSMUSG00000005899	16	17619354	17644828	59	1
ENSMUSG00000005973	2	105386291	105399319	8	1
ENSMUSG00000005986	19	4270180	4283137	28	1
ENSMUSG00000006005	1	150392838	150449935	81	12
ENSMUSG00000006010	1	150361305	150393080	32	3
ENSMUSG00000006024	7	16098458	16117975	23	2
ENSMUSG00000006050	18	36666681	36679366	30	6
ENSMUSG00000006057	11	96068852	96075670	12	3
ENSMUSG00000006058	11	96034885	96047430	17	1
ENSMUSG00000006134	16	17451987	17486255	3	1
ENSMUSG00000006169	11	45852051	45910625	16	1
ENSMUSG00000006215	4	141444654	141467930	32	3
ENSMUSG00000006262	5	88720855	88762058	13	1
ENSMUSG00000006273	8	69088646	69113711	26	14
ENSMUSG00000006288	14	50765415	50785518	10	3
ENSMUSG00000006304	1	74236084	74268209	19	1
ENSMUSG00000006335	7	3620324	3629929	14	1
ENSMUSG00000006373	X	36598206	36606079	3	2
ENSMUSG00000006386	4	94739289	94874976	31	1
ENSMUSG00000006392	4	118409337	118415782	29	4
ENSMUSG00000006423	X	36823737	36874111	21	6
ENSMUSG00000006435	19	47178820	47259440	7	1
ENSMUSG00000006456 ENSMUSG00000096370 ENSMUSG00000094936	19	4742913	4811634	38	6
ENSMUSG00000006464	19	4886898	4906627	17	2
ENSMUSG00000006476	2	25054355	25062881	48	1
ENSMUSG00000006575	11	102393403	102402555	27	2
ENSMUSG00000006576	1	75546266	75562172	48	1
ENSMUSG00000006599	7	46796103	46823800	24	2
ENSMUSG00000006651	7	30434981	30445582	17	1
ENSMUSG00000006673 ENSMUSG00000032604 ENSMUSG00000103970	9	108507713	108560163	107	2
ENSMUSG00000006675	9	108578862	108597667	22	1
ENSMUSG00000006676	9	108490602	108502337	65	1
ENSMUSG00000006711	13	24845135	24901270	26	1
ENSMUSG00000006717	13	24817948	24831517	3	1
ENSMUSG00000006731	10	127165156	127172340	11	1
ENSMUSG00000006740	18	6201002	6242174	42	8
ENSMUSG00000006782	11	100574904	100591729	9	1
ENSMUSG00000006818	17	13007839	13018119	5	3
ENSMUSG00000006920	11	101191115	101226463	38	1
ENSMUSG00000006930	11	100347327	100356128	22	4
ENSMUSG00000006932	9	120929216	120960507	50	6
ENSMUSG00000006998	16	20651652	20663414	34	9
ENSMUSG00000007021	17	24685092	24689955	6	1
ENSMUSG00000007038	17	34931253	34935953	11	1
ENSMUSG00000007097	1	172271709	172298064	28	3
ENSMUSG00000007338	19	6053630	6057751	4	1
ENSMUSG00000007415	5	3632932	3647934	10	2
ENSMUSG00000007458	6	122308720	122317680	11	1
ENSMUSG00000007564	17	20945311	20965916	31	1
ENSMUSG00000007613	4	47353222	47414931	19	1
ENSMUSG00000007617	13	93303757	93404129	27	5
ENSMUSG00000007653	11	42419757	42629028	19	1
ENSMUSG00000007656	9	75037614	75060313	27	6
ENSMUSG00000007670	17	57021058	57031507	18	2
ENSMUSG00000007721	8	70868227	70873490	5	4
ENSMUSG00000007739	11	22990519	23003780	33	9
ENSMUSG00000007812	5	145231723	145247302	8	1
ENSMUSG00000007817	14	25459185	25666743	40	2
ENSMUSG00000007827	6	118501308	118562226	38	2
ENSMUSG00000007850	11	50376990	50386528	48	3
ENSMUSG00000007891 ENSMUSG00000045777	7	142325837	142388038	30	3
ENSMUSG00000007908	9	76014855	76136350	19	1
ENSMUSG00000007950	8	71456700	71463657	5	2
ENSMUSG00000008140	7	44489937	44496529	22	1
ENSMUSG00000008153	6	124430759	124464794	30	4
ENSMUSG00000008200	2	90745370	90781021	36	1
ENSMUSG00000008333	2	143063039	143072853	12	1
ENSMUSG00000008373	7	3629985	3642486	25	1
ENSMUSG00000008435 ENSMUSG00000077965	7	4424770	4445649	23	1
ENSMUSG00000008475	1	152766542	152775597	6	2
ENSMUSG00000008489	4	91250763	91400785	36	4
ENSMUSG00000008575	4	82290173	82705750	29	2
ENSMUSG00000008604	3	88553758	88569725	21	2
ENSMUSG00000008658	16	6809222	7412479	16	5
ENSMUSG00000008690	15	89355719	89372826	49	1
ENSMUSG00000008730	3	103739815	103791563	29	3
ENSMUSG00000008763	3	100562208	100685503	24	7
ENSMUSG00000008892	8	22577075	22593813	10	2
ENSMUSG00000009090	11	4986824	5042791	32	2
ENSMUSG00000009207	2	74520291	74579435	39	3
ENSMUSG00000009216	2	27110380	27142491	3	1
ENSMUSG00000009291	10	77581720	77598732	24	4
ENSMUSG00000009376	6	17463800	17573980	35	1
ENSMUSG00000009394	6	115134902	115282626	14	3
ENSMUSG00000009418 ENSMUSG00000090399	1	135434580	135688105	52	5
ENSMUSG00000009470	13	98839019	98926384	31	3
ENSMUSG00000009549	2	118475850	118479711	13	2
ENSMUSG00000009575	15	103191544	103239816	13	1
ENSMUSG00000009647	10	59446984	59616692	19	1
ENSMUSG00000009894	11	59407134	59451186	23	1
ENSMUSG00000009907	1	106764071	106796728	22	2
ENSMUSG00000010025	11	61223417	61267464	22	1
ENSMUSG00000010066	9	107399612	107529343	57	1
ENSMUSG00000010086	11	61448442	61454131	29	2
ENSMUSG00000010205 ENSMUSG00000098907	9	21074168	21091988	15	1
ENSMUSG00000010277	11	78261752	78290623	56	7
ENSMUSG00000010307	7	47050640	47054776	3	1
ENSMUSG00000010376	14	55662265	55671906	8	1
ENSMUSG00000010608	12	83631236	83683123	60	8
ENSMUSG00000010663	19	10182888	10196870	12	3
ENSMUSG00000010755	7	143557230	143600090	39	1
ENSMUSG00000010803	11	42130939	42182930	17	6
ENSMUSG00000011114	9	37649182	37657312	16	2
ENSMUSG00000011257	4	123262351	123298925	29	5
ENSMUSG00000011589	17	55986511	55996881	13	1
ENSMUSG00000011752	19	41911871	41918664	4	3
ENSMUSG00000011831	5	107744795	107875107	46	7
ENSMUSG00000011832	8	4166567	4211257	49	2
ENSMUSG00000011877	11	77493562	77507786	32	3
ENSMUSG00000012405	14	18267823	18271391	13	6
ENSMUSG00000012535	6	29540827	29609887	45	2
ENSMUSG00000012609	12	85824659	86061893	77	1
ENSMUSG00000012640	7	43296197	43313294	19	1
ENSMUSG00000013033	8	83900105	83941954	40	2
ENSMUSG00000013236	17	56412431	56476483	38	3
ENSMUSG00000013523	2	170346991	170427845	27	3
ENSMUSG00000013593	1	171234853	171251388	22	1
ENSMUSG00000013622	5	31048312	31054633	26	1
ENSMUSG00000013662	19	32672563	32712298	10	4
ENSMUSG00000013698	1	172196728	172206804	12	5
ENSMUSG00000013787	17	34898469	34914052	59	4
ENSMUSG00000013921	7	30291672	30308367	28	2
ENSMUSG00000013997	1	171338008	171345646	27	1
ENSMUSG00000014077	2	119547697	119587027	15	4
ENSMUSG00000014177	11	62879455	62916780	14	3
ENSMUSG00000014195	11	100582818	100620168	33	12
ENSMUSG00000014226	1	160202367	160212875	11	6
ENSMUSG00000014232 ENSMUSG00000005982 ENSMUSG00000093575	16	3872375	3941147	58	7
ENSMUSG00000014313	15	35925886	35938246	15	2
ENSMUSG00000014355	2	128610104	128687391	70	2
ENSMUSG00000014426	17	12227621	12318660	27	1
ENSMUSG00000014504	18	34330847	34336599	17	1
ENSMUSG00000014550	6	92186712	92214925	21	5
ENSMUSG00000014592	4	150917322	151861876	52	1
ENSMUSG00000014601	3	107612532	107631710	21	2
ENSMUSG00000014602	1	93015464	93101951	75	7
ENSMUSG00000014763	17	15396246	15433580	11	2
ENSMUSG00000014837	8	105280410	105289528	8	1
ENSMUSG00000014850	13	92211872	92355003	57	1
ENSMUSG00000014867	2	26920040	26933928	11	2
ENSMUSG00000014905	12	44205897	44210068	3	2
ENSMUSG00000014956	5	32458974	32517433	14	1
ENSMUSG00000014959	2	70661576	70712636	20	2
ENSMUSG00000015002	15	65787034	65873816	45	4
ENSMUSG00000015023	8	110974996	110997800	17	1
ENSMUSG00000015087	2	25583018	25608521	35	7
ENSMUSG00000015090	2	25466709	25470046	16	2
ENSMUSG00000015092	2	25557847	25562082	13	1
ENSMUSG00000015094 ENSMUSG00000015085	2	25395874	25409494	58	2
ENSMUSG00000015120	17	25261916	25274622	35	3
ENSMUSG00000015143	12	80167542	80260371	24	1
ENSMUSG00000015165	7	28808541	28822266	40	4
ENSMUSG00000015176	19	46075863	46085528	13	1
ENSMUSG00000015189	6	4600840	4643381	24	4
ENSMUSG00000015222	1	66175273	66442583	68	3
ENSMUSG00000015243	4	53030787	53159895	52	1
ENSMUSG00000015341	8	23241353	23257074	10	1
ENSMUSG00000015396	13	43785107	43803130	5	1
ENSMUSG00000015461	17	34647146	34655074	27	4
ENSMUSG00000015476	17	34629533	34633126	6	1
ENSMUSG00000015488	2	27009926	27021089	21	2
ENSMUSG00000015501	10	13966075	14151374	23	2
ENSMUSG00000015536	13	114818236	114832275	45	9
ENSMUSG00000015568	8	68880491	68907448	18	1
ENSMUSG00000015605	17	46546839	46556162	7	2
ENSMUSG00000015672	13	14610301	14613037	3	2
ENSMUSG00000015733	6	17636234	17666972	26	2
ENSMUSG00000015747	3	95999832	96058466	19	1
ENSMUSG00000015749	3	95929246	95947390	28	2
ENSMUSG00000015755	10	7905653	7956230	17	1
ENSMUSG00000015757	10	7792891	7823135	21	3
ENSMUSG00000015766	6	137477245	137654876	50	4
ENSMUSG00000015806	5	45434032	45450235	21	4
ENSMUSG00000015829	1	159523769	159931729	31	1
ENSMUSG00000015837	11	50199366	50210827	24	2
ENSMUSG00000015882	5	45697181	45857615	25	2
ENSMUSG00000015932	2	143915320	143943324	4	1
ENSMUSG00000015961	1	177762962	177796511	17	1
ENSMUSG00000015968	14	30039949	30491156	48	1
ENSMUSG00000015971	14	29978337	29993221	13	2
ENSMUSG00000016018	13	112867780	112927380	27	6
ENSMUSG00000016150	X	42527866	43429126	43	1
ENSMUSG00000016200	1	192891233	193035775	16	1
ENSMUSG00000016253	2	174415804	174427502	29	3
ENSMUSG00000016256	2	174427493	174439039	6	4
ENSMUSG00000016257	2	174465067	174473081	16	3
ENSMUSG00000016319	X	36795651	36798807	9	3
ENSMUSG00000016382	X	75785654	75875182	26	1
ENSMUSG00000016427	X	37187588	37191163	3	1
ENSMUSG00000016487	6	146888487	147032025	51	1
ENSMUSG00000016510	5	146951573	146963800	17	2
ENSMUSG00000016534	X	38401357	38456454	15	3
ENSMUSG00000016541	15	85336381	85463836	12	2
ENSMUSG00000016559	11	116021912	116027962	14	6
ENSMUSG00000016619	15	84923428	84942955	8	1
ENSMUSG00000016664	15	83375607	83464606	18	1
ENSMUSG00000016831	14	52279146	52296391	21	4
ENSMUSG00000016833	5	100798627	100804471	14	1
ENSMUSG00000016921	2	162931528	162937121	15	1
ENSMUSG00000016933	2	160731300	160775760	62	1
ENSMUSG00000017009	2	164424247	164443887	7	3
ENSMUSG00000017119 ENSMUSG00000099023	11	101552149	101581951	59	9
ENSMUSG00000017132	11	118132019	118248592	25	2
ENSMUSG00000017144	2	51130438	51149111	10	1
ENSMUSG00000017221	11	98682554	98695979	23	2
ENSMUSG00000017264	4	148558429	148582401	42	1
ENSMUSG00000017286 ENSMUSG00000049396 ENSMUSG00000017288	11	76046226	76243725	81	1
ENSMUSG00000017291	11	77529162	77607815	21	2
ENSMUSG00000017314	11	102057015	102088515	25	1
ENSMUSG00000017412	2	52428320	52676831	24	3
ENSMUSG00000017418	2	15049395	15082456	22	1
ENSMUSG00000017421	11	80383279	80405733	34	1
ENSMUSG00000017428	11	80428615	80473248	47	1
ENSMUSG00000017466	11	118301069	118355740	7	1
ENSMUSG00000017478	8	122376609	122417360	37	5
ENSMUSG00000017485	14	16365179	16430787	46	7
ENSMUSG00000017548	11	79993106	80034123	25	4
ENSMUSG00000017631	11	76416734	76622314	46	10
ENSMUSG00000017639	11	79591212	79698023	17	1
ENSMUSG00000017677	11	79239372	79254671	22	4
ENSMUSG00000017707	2	163623272	163645131	13	1
ENSMUSG00000017715	11	117986292	118024011	15	1
ENSMUSG00000017721	2	164497520	164508301	23	1
ENSMUSG00000017765	8	105943590	105966115	31	1
ENSMUSG00000017774	11	75650504	75673910	51	1
ENSMUSG00000017781	11	75588097	75628804	24	1
ENSMUSG00000017831	17	53479234	53507671	6	2
ENSMUSG00000017843	12	110485739	110583061	14	4
ENSMUSG00000017978	6	23262773	23839421	61	8
ENSMUSG00000017999	2	167015193	167034947	34	1
ENSMUSG00000018001	5	143622447	143710250	22	2
ENSMUSG00000018040	15	83113433	83122801	18	4
ENSMUSG00000018076	5	118560719	118765435	31	2
ENSMUSG00000018102	13	23684199	23692488	2	2
ENSMUSG00000018160	11	98152154	98193293	32	2
ENSMUSG00000018189	1	143777272	143807466	27	1
ENSMUSG00000018199	1	143750790	143777068	12	6
ENSMUSG00000018209	2	164070322	164155524	18	2
ENSMUSG00000018293	11	70651850	70654644	11	2
ENSMUSG00000018362	11	106988629	106999541	23	4
ENSMUSG00000018372	11	106789252	106819930	33	1
ENSMUSG00000018395	11	53567379	53601967	35	8
ENSMUSG00000018398	11	53519257	53549565	25	3
ENSMUSG00000018401	11	87592162	87616302	29	2
ENSMUSG00000018411	11	104231390	104332090	36	6
ENSMUSG00000018415	11	60417145	60450927	10	2
ENSMUSG00000018417	1	51749765	51916071	61	1
ENSMUSG00000018425	11	86768846	86807746	23	2
ENSMUSG00000018470	11	69326258	69333042	17	1
ENSMUSG00000018474	11	69343273	69369406	58	17
ENSMUSG00000018476	11	69398508	69413675	25	1
ENSMUSG00000018481	11	85187262	85235130	13	2
ENSMUSG00000018501	11	62316426	62458541	100	8
ENSMUSG00000018548	11	87127077	87220683	29	5
ENSMUSG00000018585	11	55446641	55461239	6	1
ENSMUSG00000018593	11	55394500	55420080	20	2
ENSMUSG00000018648	11	84048041	84069261	11	2
ENSMUSG00000018651	11	84078920	84129600	24	1
ENSMUSG00000018661	11	113649169	113667054	30	1
ENSMUSG00000018666	11	96789127	96808640	15	6
ENSMUSG00000018707	12	110601452	110666945	92	9
ENSMUSG00000018736	11	68821434	68871858	20	10
ENSMUSG00000018750	11	69765912	69784023	23	1
ENSMUSG00000018765	11	69632990	69653297	28	3
ENSMUSG00000018770	2	73908447	73911326	14	1
ENSMUSG00000018796	8	46471041	46536051	38	4
ENSMUSG00000018846	11	35769484	35791285	7	1
ENSMUSG00000018848	11	35808381	35834506	24	7
ENSMUSG00000018849	11	35838400	35980527	27	3
ENSMUSG00000018858	11	115403752	115412674	28	3
ENSMUSG00000018865	15	84076097	84105754	7	2
ENSMUSG00000018909	7	99535466	99606771	37	1
ENSMUSG00000019082	7	141429739	141437892	54	4
ENSMUSG00000019087	X	74297097	74304721	35	2
ENSMUSG00000019124	6	54505890	54566489	14	2
ENSMUSG00000019132	13	24801657	24814013	8	4
ENSMUSG00000019139	8	70594481	70597288	11	1
ENSMUSG00000019173	11	100715009	100738215	13	2
ENSMUSG00000019302	11	101009452	101063719	40	16
ENSMUSG00000019362	8	84246237	84249761	3	2
ENSMUSG00000019370	7	16915379	16924114	16	3
ENSMUSG00000019373	11	59817795	59839838	25	1
ENSMUSG00000019428	8	70527724	70535328	32	5
ENSMUSG00000019437 ENSMUSG00000099101	11	78176711	78181909	26	1
ENSMUSG00000019467	10	127182521	127190054	17	3
ENSMUSG00000019471	9	21138541	21149906	8	2
ENSMUSG00000019590	11	105933702	105953336	20	1
ENSMUSG00000019699	1	177020073	177258203	18	3
ENSMUSG00000019710	3	87919506	87923672	16	1
ENSMUSG00000019726	13	13590409	13777440	53	1
ENSMUSG00000019763	10	4401915	4432388	31	2
ENSMUSG00000019772	10	5639218	5647614	7	1
ENSMUSG00000019775	10	5825663	5922400	11	3
ENSMUSG00000019777	10	36974544	37001889	22	4
ENSMUSG00000019789	10	30832359	30842801	5	1
ENSMUSG00000019790	10	9755547	9901079	50	1
ENSMUSG00000019792	10	30534225	30600749	13	1
ENSMUSG00000019795	10	7629373	7681136	25	8
ENSMUSG00000019796	10	7589800	7625483	16	2
ENSMUSG00000019797	10	43525121	43540994	11	1
ENSMUSG00000019802	10	42761496	42832514	33	3
ENSMUSG00000019810	10	13499540	13519035	20	1
ENSMUSG00000019818	10	41519414	41531048	12	1
ENSMUSG00000019820	10	12382188	12861735	74	3
ENSMUSG00000019837	10	40249203	40257665	6	1
ENSMUSG00000019843	10	39368855	39565381	29	1
ENSMUSG00000019851	10	18845071	18857073	3	1
ENSMUSG00000019852	10	18588011	18743758	34	2
ENSMUSG00000019856	10	53633145	53750909	33	2
ENSMUSG00000019876	10	57631981	57741112	30	1
ENSMUSG00000019877	10	57515774	57532530	20	6
ENSMUSG00000019878	10	57486385	57513133	12	1
ENSMUSG00000019894	10	103367808	103419378	13	1
ENSMUSG00000019899	10	26980036	27619758	77	2
ENSMUSG00000019907	10	108162400	108277575	26	6
ENSMUSG00000019923	10	72654845	72674964	20	5
ENSMUSG00000019929	10	97479500	97518162	9	1
ENSMUSG00000019943	10	98915152	99026143	21	4
ENSMUSG00000019947	10	68095593	68278726	10	2
ENSMUSG00000019951	10	89744991	89819869	21	3
ENSMUSG00000019960	10	99263231	99267488	3	3
ENSMUSG00000019970	10	21882184	21999903	37	1
ENSMUSG00000019975	10	91082940	91102607	13	2
ENSMUSG00000019977	10	21295979	21368889	19	3
ENSMUSG00000019978	10	25359798	25523519	21	1
ENSMUSG00000019979	10	90989311	91082770	44	2
ENSMUSG00000019986	10	20952547	21080428	25	7
ENSMUSG00000019996	10	20148471	20281589	20	1
ENSMUSG00000019997	10	24595442	24598683	11	2
ENSMUSG00000019998	10	24149317	24188959	10	4
ENSMUSG00000020015	10	93160876	93241342	17	4
ENSMUSG00000020018	10	93583029	93589706	4	1
ENSMUSG00000020019	10	93640681	93747207	12	1
ENSMUSG00000020022	10	94198955	94221443	11	6
ENSMUSG00000020023	10	94311949	94590956	23	1
ENSMUSG00000020024	10	94688790	94790336	16	1
ENSMUSG00000020032	10	84370905	84440597	9	2
ENSMUSG00000020044	10	86300372	86349506	11	3
ENSMUSG00000020064	10	63243797	63317881	25	1
ENSMUSG00000020070	10	62980223	63017210	34	4
ENSMUSG00000020074	10	62743928	62792368	25	3
ENSMUSG00000020075	10	62580248	62602298	15	1
ENSMUSG00000020076	10	62616023	62651218	15	2
ENSMUSG00000020088	10	61680310	61693295	7	3
ENSMUSG00000020089	10	61648552	61674168	17	2
ENSMUSG00000020101	10	60346851	60372684	21	2
ENSMUSG00000020102	10	125226464	125328963	8	2
ENSMUSG00000020107	10	59987409	60003135	20	2
ENSMUSG00000020109	10	59879556	59899302	19	1
ENSMUSG00000020111	10	59702477	59864132	38	1
ENSMUSG00000020114	10	119199255	119240055	21	6
ENSMUSG00000020115	10	121546455	121586794	21	3
ENSMUSG00000020128	11	21239281	21321136	35	1
ENSMUSG00000020134	11	21091291	21150323	14	3
ENSMUSG00000020151	10	116018213	116274932	25	3
ENSMUSG00000020152	11	20062304	20112913	13	1
ENSMUSG00000020153	10	80249121	80256794	22	2
ENSMUSG00000020176	11	11930508	12038683	28	2
ENSMUSG00000020181	10	109682660	110456204	50	3
ENSMUSG00000020189	10	111164802	111297247	24	8
ENSMUSG00000020196	10	75646110	75764357	37	2
ENSMUSG00000020211	10	80798198	80804924	16	2
ENSMUSG00000020220	4	144972622	145195005	89	3
ENSMUSG00000020231	10	76259429	76345291	57	4
ENSMUSG00000020232	10	81346048	81350480	39	1
ENSMUSG00000020267	11	54866383	54870501	6	3
ENSMUSG00000020271	11	32642724	32746816	22	6
ENSMUSG00000020273	11	23862646	23895253	27	1
ENSMUSG00000020277	10	77986947	78010083	27	1
ENSMUSG00000020288	11	23487882	23498030	28	3
ENSMUSG00000020290	11	23256041	23298249	42	5
ENSMUSG00000020297	11	32000463	32059202	8	6
ENSMUSG00000020300	11	31872211	31935634	13	2
ENSMUSG00000020315	11	30099395	30268175	48	6
ENSMUSG00000020321	11	21556787	21572367	17	2
ENSMUSG00000020326	11	40748552	40755311	10	1
ENSMUSG00000020333	11	54303798	54364756	50	13
ENSMUSG00000020340	11	46193850	46312859	39	2
ENSMUSG00000020346	11	49244191	49263030	28	1
ENSMUSG00000020361	11	53259814	53300457	22	1
ENSMUSG00000020368	11	50293961	50325673	23	1
ENSMUSG00000020375	11	50389286	50431125	24	3
ENSMUSG00000020376	11	50025346	50104758	12	2
ENSMUSG00000020380	11	53649519	53707319	32	1
ENSMUSG00000020389	11	52004221	52089784	45	1
ENSMUSG00000020390	11	51985497	52000762	12	1
ENSMUSG00000020402	11	52360860	52389397	18	6
ENSMUSG00000020409	11	43433744	43447981	26	3
ENSMUSG00000020430	11	3963975	3980004	20	1
ENSMUSG00000020431	11	7063489	7178506	24	6
ENSMUSG00000020436	11	41910203	42000857	16	3
ENSMUSG00000020451	11	3344256	3409189	39	1
ENSMUSG00000020454	11	3202392	3244588	45	3
ENSMUSG00000020456	11	6291633	6356642	38	1
ENSMUSG00000020457 ENSMUSG00000023764	11	3131850	3266415	91	1
ENSMUSG00000020458	11	29692947	29744331	24	9
ENSMUSG00000020459	11	29526408	29545279	30	4
ENSMUSG00000020462	11	29221532	29247409	18	6
ENSMUSG00000020464	11	29130744	29161828	35	2
ENSMUSG00000020467	11	28853204	28926743	13	1
ENSMUSG00000020477 ENSMUSG00000049680	11	5703983	5762376	33	4
ENSMUSG00000020482	11	5528887	5542187	5	1
ENSMUSG00000020483	11	87979525	87987533	10	3
ENSMUSG00000020496	11	58932288	58938916	4	3
ENSMUSG00000020515	11	58104153	58118594	12	2
ENSMUSG00000020516	11	86498871	86544805	29	2
ENSMUSG00000020524	11	57011387	57330244	26	3
ENSMUSG00000020530	11	84832361	84870817	43	3
ENSMUSG00000020570	12	32953891	32979050	18	1
ENSMUSG00000020571	12	17266545	17284770	21	1
ENSMUSG00000020580	12	16894978	16988274	33	11
ENSMUSG00000020585	12	8921664	8938742	7	1
ENSMUSG00000020589	12	12262139	12376359	13	2
ENSMUSG00000020590	12	35047189	35147469	28	2
ENSMUSG00000020594	12	8674134	8752581	55	3
ENSMUSG00000020598	12	44328885	44601846	32	9
ENSMUSG00000020601	12	15791727	15816877	7	2
ENSMUSG00000020607	12	14147599	14152038	2	2
ENSMUSG00000020608	12	11265886	11319785	27	1
ENSMUSG00000020610	11	109425946	109452813	23	1
ENSMUSG00000020611	11	109362831	109401369	5	1
ENSMUSG00000020612	11	109649405	109669656	17	1
ENSMUSG00000020620	11	109932190	109995845	41	1
ENSMUSG00000020621	12	10390780	10395562	2	1
ENSMUSG00000020623	11	110399122	110525522	18	1
ENSMUSG00000020640	12	4593008	4713950	39	1
ENSMUSG00000020653	12	24651371	24662774	9	1
ENSMUSG00000020656	12	24572287	24617391	18	1
ENSMUSG00000020658	12	3962554	4038915	23	6
ENSMUSG00000020659	12	31484829	31499616	20	1
ENSMUSG00000020671	12	3247430	3309969	6	2
ENSMUSG00000020694	11	105178807	105283959	44	6
ENSMUSG00000020705	11	106216926	106249139	20	3
ENSMUSG00000020716	11	79339693	79581612	73	7
ENSMUSG00000020719 ENSMUSG00000093273 ENSMUSG00000093133	11	106780355	106789185	40	8
ENSMUSG00000020720	11	107479484	107504362	15	1
ENSMUSG00000020721	11	107547930	107693826	50	2
ENSMUSG00000020723	11	107732357	107794557	6	1
ENSMUSG00000020736	11	115490420	115491862	14	2
ENSMUSG00000020739	11	115564434	115583985	36	1
ENSMUSG00000020755	11	115933282	115966725	17	1
ENSMUSG00000020776	11	116142285	116168166	62	1
ENSMUSG00000020783	11	73047783	73080217	18	2
ENSMUSG00000020790	11	72690006	72772146	32	3
ENSMUSG00000020794	11	72607283	72686481	9	2
ENSMUSG00000020802	11	116537740	116581447	22	1
ENSMUSG00000020807	11	72153929	72207459	35	2
ENSMUSG00000020811	11	71749920	71789647	16	1
ENSMUSG00000020817	11	70844778	70943105	35	3
ENSMUSG00000020823	11	117115168	117159268	28	3
ENSMUSG00000020827	11	70562881	70614483	62	2
ENSMUSG00000020840	11	76924809	76987379	32	1
ENSMUSG00000020849	11	75732869	75765845	15	4
ENSMUSG00000020850	11	75486816	75509449	49	1
ENSMUSG00000020859	11	93996091	94126085	56	11
ENSMUSG00000020864	11	94328001	94341841	14	3
ENSMUSG00000020868	11	94663851	94677515	20	1
ENSMUSG00000020873	11	95384692	95391776	18	1
ENSMUSG00000020882	11	98001508	98023034	26	2
ENSMUSG00000020889	11	98767932	98775333	10	1
ENSMUSG00000020893	11	69095217	69109960	33	1
ENSMUSG00000020900	11	68691559	68816632	62	8
ENSMUSG00000020917	11	100476353	100528000	40	5
ENSMUSG00000020921	11	102152546	102156404	9	1
ENSMUSG00000020922	11	102162497	102185296	15	2
ENSMUSG00000020923	11	102304560	102319742	42	4
ENSMUSG00000020926	11	102761439	102780262	44	2
ENSMUSG00000020929	11	102838473	102880985	56	4
ENSMUSG00000020932	11	102887336	102900912	13	3
ENSMUSG00000020936	11	103028190	103068912	18	7
ENSMUSG00000020948	12	64942440	64965536	5	2
ENSMUSG00000020952	12	51377580	51450096	25	4
ENSMUSG00000020954	12	51608541	51691914	18	6
ENSMUSG00000020955	12	51690966	51738939	6	1
ENSMUSG00000020962	12	91555916	91590487	13	2
ENSMUSG00000020964	12	91806043	91849157	42	5
ENSMUSG00000020978	12	69296681	69310687	21	2
ENSMUSG00000020986	12	58958383	59012017	27	7
ENSMUSG00000020993	12	59043093	59061461	6	2
ENSMUSG00000021000	12	59129720	59191583	62	4
ENSMUSG00000021007	12	98628157	98669815	21	1
ENSMUSG00000021012	12	98746968	98787774	18	5
ENSMUSG00000021022	12	55280814	55303000	14	1
ENSMUSG00000021024	12	55384222	55418454	13	1
ENSMUSG00000021025	12	55489411	55492647	6	1
ENSMUSG00000021027 ENSMUSG00000092949	12	55602929	55821167	44	8
ENSMUSG00000021039	12	87449936	87472299	14	4
ENSMUSG00000021048	12	76255232	76319820	28	1
ENSMUSG00000021051	12	75450883	75596200	14	3
ENSMUSG00000021054	12	75714248	75735729	3	2
ENSMUSG00000021057	12	76324891	76334153	6	3
ENSMUSG00000021061	12	76580488	76710547	42	1
ENSMUSG00000021062	12	76797960	76822908	19	1
ENSMUSG00000021065	12	77238104	77476338	15	2
ENSMUSG00000021068	12	70011435	70111925	37	2
ENSMUSG00000021071	12	70244539	70347614	15	1
ENSMUSG00000021072	12	70453095	70468040	12	3
ENSMUSG00000021076	12	70937857	70964718	13	4
ENSMUSG00000021087	12	72211752	72409054	15	1
ENSMUSG00000021111	12	105784694	105838944	62	3
ENSMUSG00000021112	12	78748947	78840711	15	4
ENSMUSG00000021113	12	73964530	73984820	10	1
ENSMUSG00000021114	12	78842989	78861638	9	2
ENSMUSG00000021120	12	79080673	79089670	4	1
ENSMUSG00000021124	12	79156017	79172667	12	1
ENSMUSG00000021134	12	80945504	80950507	33	3
ENSMUSG00000021139 ENSMUSG00000090935 ENSMUSG00000091803	12	81358860	81532911	46	4
ENSMUSG00000021140	12	81860030	82000924	36	4
ENSMUSG00000021147	13	8802968	8871909	48	2
ENSMUSG00000021149	13	8972071	8996017	17	3
ENSMUSG00000021156	13	9684836	9765321	53	1
ENSMUSG00000021171	12	116281222	116373096	22	1
ENSMUSG00000021178	12	100110186	100123364	11	4
ENSMUSG00000021179	12	100125452	100159653	14	1
ENSMUSG00000021188	12	101834043	101913267	35	4
ENSMUSG00000021190	12	102394084	102439813	18	1
ENSMUSG00000021192	12	102469134	102497902	14	3
ENSMUSG00000021196	13	6579768	6648777	50	3
ENSMUSG00000021209	12	103532283	103613831	36	3
ENSMUSG00000021215	13	3882565	3918220	13	1
ENSMUSG00000021219	12	82616925	83162056	36	2
ENSMUSG00000021244	12	84996321	85070515	36	4
ENSMUSG00000021250	12	85473890	85477273	10	1
ENSMUSG00000021254	12	86241890	86291414	10	1
ENSMUSG00000021259	12	108334377	108362231	15	1
ENSMUSG00000021264	12	108792973	108816632	7	1
ENSMUSG00000021270	12	110690605	110702728	29	6
ENSMUSG00000021271	12	110850279	110869998	8	1
ENSMUSG00000021279	12	111292972	111377718	37	5
ENSMUSG00000021282	12	111538101	111546753	14	5
ENSMUSG00000021285	12	111828458	111908055	19	1
ENSMUSG00000021288	12	111758849	111807844	34	7
ENSMUSG00000021301	13	14226438	14523226	29	4
ENSMUSG00000021313	13	11553103	12106945	107	15
ENSMUSG00000021314	13	18948371	19150913	21	3
ENSMUSG00000021340	13	24943152	24990753	31	1
ENSMUSG00000021357	13	30813919	30974047	30	2
ENSMUSG00000021365	13	41309916	41487320	9	1
ENSMUSG00000021373	13	46501848	46649642	18	4
ENSMUSG00000021400	13	32802038	32822609	7	2
ENSMUSG00000021413	13	34875494	34902877	15	5
ENSMUSG00000021427	13	37971401	37994190	8	2
ENSMUSG00000021458	13	63014934	63326096	22	1
ENSMUSG00000021466	13	63508328	63573598	40	1
ENSMUSG00000021476	13	64161866	64186536	8	5
ENSMUSG00000021477	13	64363214	64370306	8	1
ENSMUSG00000021482	13	64291836	64312710	6	1
ENSMUSG00000021486	13	55322055	55325271	5	2
ENSMUSG00000021488	13	55209782	55318325	23	1
ENSMUSG00000021501	13	55623005	55632411	7	2
ENSMUSG00000021518	13	66932830	66998401	13	3
ENSMUSG00000021536	13	68620043	68999541	25	1
ENSMUSG00000021546	13	58391142	58403343	59	1
ENSMUSG00000021548	13	85189408	85223469	23	3
ENSMUSG00000021549	13	85214780	85289029	41	1
ENSMUSG00000021557	13	59449537	59585227	72	6
ENSMUSG00000021559	13	60601947	60763185	29	5
ENSMUSG00000021573	13	74009407	74035753	11	4
ENSMUSG00000021589	13	75869537	75943925	16	1
ENSMUSG00000021596	13	76384535	77031810	35	2
ENSMUSG00000021597	13	77043088	77135473	33	8
ENSMUSG00000021613	13	89540636	89611832	5	2
ENSMUSG00000021635	13	100617165	100651059	18	1
ENSMUSG00000021639	13	100460218	100492579	33	1
ENSMUSG00000021643	13	100107997	100114571	16	1
ENSMUSG00000021646	13	99948533	100015639	17	3
ENSMUSG00000021661	13	98263158	98274750	20	3
ENSMUSG00000021662	13	97898595	98206165	36	5
ENSMUSG00000021665	13	97176332	97198357	14	3
ENSMUSG00000021669	13	96542618	96640167	21	2
ENSMUSG00000021680	13	95431371	95444831	7	1
ENSMUSG00000021684	13	95024454	95250336	47	1
ENSMUSG00000021686	13	94358960	94566316	27	1
ENSMUSG00000021687	13	94201310	94285857	16	8
ENSMUSG00000021690	13	93430097	93499808	11	1
ENSMUSG00000021700	13	110054187	110280206	5	1
ENSMUSG00000021701	13	110395044	110400844	14	2
ENSMUSG00000021706	13	92487108	92530868	24	1
ENSMUSG00000021708	13	91880400	92131656	40	2
ENSMUSG00000021709	13	103818787	103920514	35	2
ENSMUSG00000021711	13	104142149	104178469	26	2
ENSMUSG00000021712	13	104178797	104203372	17	5
ENSMUSG00000021719	13	104947153	105054930	6	4
ENSMUSG00000021728	13	117220625	117274098	9	1
ENSMUSG00000021738	14	14012491	14107296	12	1
ENSMUSG00000021756	13	112464070	112510086	35	1
ENSMUSG00000021764	13	114287795	114388094	5	1
ENSMUSG00000021767	14	21481434	21672478	47	1
ENSMUSG00000021770	14	21750531	21798725	12	1
ENSMUSG00000021771	14	21831269	21845879	28	2
ENSMUSG00000021774	14	18282722	18331859	12	3
ENSMUSG00000021775	14	18204054	18239127	10	2
ENSMUSG00000021779	14	17660960	18038088	14	2
ENSMUSG00000021792	14	40993740	41013788	24	2
ENSMUSG00000021794	14	34310727	34345144	21	2
ENSMUSG00000021811	14	20384638	20388910	5	2
ENSMUSG00000021814	14	20455261	20480133	14	1
ENSMUSG00000021820	14	20734875	20794088	21	2
ENSMUSG00000021824	14	21031442	21052508	29	1
ENSMUSG00000021840	14	47298314	47323204	6	1
ENSMUSG00000021843	14	47648448	47736564	77	3
ENSMUSG00000021870	14	26413168	26534931	55	5
ENSMUSG00000021893	14	31336638	31371986	26	2
ENSMUSG00000021895	14	27238039	27403904	11	3
ENSMUSG00000021901	14	31251450	31259944	38	6
ENSMUSG00000021906	14	32085374	32103202	35	1
ENSMUSG00000021910	14	31170930	31216946	77	3
ENSMUSG00000021918	14	30951486	30987439	15	1
ENSMUSG00000021929	14	61365186	61439947	17	5
ENSMUSG00000021936	14	33377898	33447158	31	1
ENSMUSG00000021938	14	56722441	56778316	14	2
ENSMUSG00000021967	14	57826239	57828745	2	1
ENSMUSG00000021981	14	59440981	59548903	11	1
ENSMUSG00000021987	14	60265205	60302370	14	4
ENSMUSG00000021990	14	60634001	60764556	32	1
ENSMUSG00000021991	14	28904943	29721864	38	6
ENSMUSG00000022000	14	75284373	75344426	19	2
ENSMUSG00000022008	14	76086232	76110815	8	1
ENSMUSG00000022010	14	76414961	76507765	43	2
ENSMUSG00000022016	14	78492246	78536860	14	6
ENSMUSG00000022023	14	79459937	79481268	10	1
ENSMUSG00000022043	14	66297031	66311424	8	2
ENSMUSG00000022048	14	66802864	66868688	14	6
ENSMUSG00000022052	14	67014057	67072471	10	2
ENSMUSG00000022055	14	68083863	68089095	4	2
ENSMUSG00000022064	14	99099433	99254493	18	1
ENSMUSG00000022099	14	70602184	70636048	21	1
ENSMUSG00000022103	14	70890130	70979838	9	1
ENSMUSG00000022105	14	73183673	73325822	37	1
ENSMUSG00000022108	14	73362231	73385271	6	3
ENSMUSG00000022110	14	73525319	73596142	27	4
ENSMUSG00000022111	14	101653967	101696124	9	3
ENSMUSG00000022112	14	115092215	116525179	14	3
ENSMUSG00000022122	14	103814625	103844173	10	2
ENSMUSG00000022124	14	103080239	103099566	17	4
ENSMUSG00000022136	14	118937932	118981702	12	2
ENSMUSG00000022139	14	120275669	120431697	9	5
ENSMUSG00000022141	15	8291225	8444463	47	1
ENSMUSG00000022142	15	8109313	8159857	35	1
ENSMUSG00000022151	15	5185525	5218336	12	1
ENSMUSG00000022159	14	52261759	52279545	24	1
ENSMUSG00000022180	14	54722216	54781886	11	1
ENSMUSG00000022186	15	4026383	4155344	26	1
ENSMUSG00000022197	15	12359711	12739924	47	1
ENSMUSG00000022201	15	12117831	12185683	39	6
ENSMUSG00000022205	15	11981339	11996983	11	5
ENSMUSG00000022208	14	55106830	55116935	12	2
ENSMUSG00000022211	14	55491093	55508246	40	2
ENSMUSG00000022212	14	55510445	55517431	35	2
ENSMUSG00000022216	14	55578123	55581529	43	1
ENSMUSG00000022223	14	55897286	55900232	6	1
ENSMUSG00000022228	13	21442175	21453730	8	1
ENSMUSG00000022234	15	31590800	31601847	20	8
ENSMUSG00000022240	15	30172593	31029311	23	2
ENSMUSG00000022244	15	10981756	10996624	5	1
ENSMUSG00000022255	15	34082694	34142386	35	1
ENSMUSG00000022257	15	34238026	34284295	7	2
ENSMUSG00000022261	15	32920723	33034730	8	2
ENSMUSG00000022262	15	28203752	28472045	79	1
ENSMUSG00000022263	15	27730652	28025848	57	10
ENSMUSG00000022265 ENSMUSG00000098416	15	27466677	27594909	15	3
ENSMUSG00000022270	15	25843264	25973687	12	1
ENSMUSG00000022272	15	25622525	25813673	65	5
ENSMUSG00000022283	15	36595661	36608973	26	11
ENSMUSG00000022285	15	36770770	36794547	20	9
ENSMUSG00000022295	15	38661904	38692443	13	3
ENSMUSG00000022300	15	39112865	39146856	11	1
ENSMUSG00000022305	15	39870603	39943994	10	1
ENSMUSG00000022307	15	41447482	41861048	23	5
ENSMUSG00000022311	15	47580637	48792063	87	1
ENSMUSG00000022314	15	51962605	51991760	14	3
ENSMUSG00000022321	15	18818947	19014236	20	2
ENSMUSG00000022323	15	34484021	34495255	14	2
ENSMUSG00000022324	15	34306680	34436242	24	1
ENSMUSG00000022332	15	68928420	69093512	9	2
ENSMUSG00000022337	15	43477229	43527777	11	6
ENSMUSG00000022340	15	44671859	44788063	9	1
ENSMUSG00000022342	15	45106284	45114934	3	3
ENSMUSG00000022351	15	59315077	59331192	17	1
ENSMUSG00000022360	15	58094047	58135082	28	3
ENSMUSG00000022362 ENSMUSG00000022361 ENSMUSG00000101892	15	58022259	58076541	40	2
ENSMUSG00000022372	15	66780819	66831829	18	1
ENSMUSG00000022376	15	64699042	64922296	18	1
ENSMUSG00000022377	15	64086857	64382919	59	2
ENSMUSG00000022378	15	63929097	64060448	14	2
ENSMUSG00000022389	15	81802421	81826861	23	2
ENSMUSG00000022391	15	81704248	81729919	20	3
ENSMUSG00000022394	15	81663889	81688315	40	3
ENSMUSG00000022403	15	81363669	81400077	23	9
ENSMUSG00000022415	15	80091334	80119501	10	4
ENSMUSG00000022416	15	80287238	80398279	45	2
ENSMUSG00000022419	15	55112317	55259271	13	1
ENSMUSG00000022425	15	54838898	54920146	34	4
ENSMUSG00000022426	15	79674250	79687872	4	1
ENSMUSG00000022427	15	79670861	79672862	6	1
ENSMUSG00000022433	15	79417856	79443919	34	1
ENSMUSG00000022434	15	85037062	85062828	9	1
ENSMUSG00000022443	15	77760587	77842175	54	1
ENSMUSG00000022450	15	82350139	82354291	3	2
ENSMUSG00000022454	15	95219451	95528706	23	3
ENSMUSG00000022456	15	82274935	82294442	12	3
ENSMUSG00000022466	15	97675105	97705822	17	1
ENSMUSG00000022474	15	81951108	81960930	22	6
ENSMUSG00000022477	15	81872309	81915133	29	2
ENSMUSG00000022489	15	103503298	103530052	16	3
ENSMUSG00000022490	15	103530279	103537992	7	2
ENSMUSG00000022507	16	8830100	8858916	4	3
ENSMUSG00000022508	16	23965052	23988852	14	1
ENSMUSG00000022517	16	4886100	4938296	18	3
ENSMUSG00000022521	16	4081328	4213407	34	3
ENSMUSG00000022523	16	28160120	28445227	5	5
ENSMUSG00000022525	16	29209695	29230531	11	2
ENSMUSG00000022526	15	76852148	76871435	4	2
ENSMUSG00000022536	16	5013906	5049910	17	1
ENSMUSG00000022538	16	30560494	30587592	32	1
ENSMUSG00000022564	15	76246807	76249904	7	1
ENSMUSG00000022565 ENSMUSG00000063268	15	76170974	76243441	79	4
ENSMUSG00000022577	15	75551268	75567255	25	4
ENSMUSG00000022587	15	74955051	74959905	39	10
ENSMUSG00000022607	15	73205105	73423191	34	4
ENSMUSG00000022619	15	89453913	89464468	14	4
ENSMUSG00000022629	15	90933276	91049948	39	1
ENSMUSG00000022636	16	52248996	52454074	27	12
ENSMUSG00000022641	16	50191844	50432390	36	1
ENSMUSG00000022656	16	46387706	46498525	28	1
ENSMUSG00000022668	16	44736768	44746363	14	1
ENSMUSG00000022674	16	15552677	15594524	11	1
ENSMUSG00000022680	16	13833148	13903131	58	2
ENSMUSG00000022682	16	13780699	13814840	18	2
ENSMUSG00000022685	16	13537964	13668170	24	1
ENSMUSG00000022696	16	44240180	44333196	35	2
ENSMUSG00000022698	16	44139830	44163366	13	1
ENSMUSG00000022710	16	8689595	8792308	60	8
ENSMUSG00000022722	16	59612949	59639391	15	4
ENSMUSG00000022744	16	58727910	58734251	19	1
ENSMUSG00000022752	16	57121714	57154530	12	2
ENSMUSG00000022761	16	17508688	17526333	47	1
ENSMUSG00000022762	16	81200697	81624285	19	3
ENSMUSG00000022763	16	17489611	17507485	35	2
ENSMUSG00000022770	16	31663443	31873356	61	5
ENSMUSG00000022771	16	17086555	17111257	42	2
ENSMUSG00000022774	16	31948513	31961781	13	4
ENSMUSG00000022788	16	16416917	16600549	37	2
ENSMUSG00000022789	16	16312235	16359030	21	1
ENSMUSG00000022791	16	32643874	32683493	46	3
ENSMUSG00000022800	16	32877500	32908963	31	2
ENSMUSG00000022801	16	32914100	33015647	41	1
ENSMUSG00000022808	16	33251456	33299562	14	10
ENSMUSG00000022812	16	38089001	38246084	18	1
ENSMUSG00000022816	16	37776873	37836514	24	3
ENSMUSG00000022817	16	33829665	33949153	24	1
ENSMUSG00000022822	16	20331303	20426394	59	1
ENSMUSG00000022829	16	37114942	37384962	39	2
ENSMUSG00000022837	16	36828385	36872721	31	2
ENSMUSG00000022840	16	35154877	35305737	21	1
ENSMUSG00000022841	16	20535478	20544909	33	3
ENSMUSG00000022848	16	35694062	35769356	11	1
ENSMUSG00000022855	16	22009484	22049269	17	2
ENSMUSG00000022858	16	22244549	22266005	21	5
ENSMUSG00000022861	16	22468461	22657221	32	5
ENSMUSG00000022865	16	78301496	78359785	10	1
ENSMUSG00000022883	16	72663149	73046095	29	1
ENSMUSG00000022884 ENSMUSG00000064382 ENSMUSG00000064880 ENSMUSG00000088524 ENSMUSG00000087935 ENSMUSG00000065208	16	23107444	23114136	71	2
ENSMUSG00000022885	16	23224740	23360350	18	1
ENSMUSG00000022890	16	84827866	84835625	27	2
ENSMUSG00000022892	16	84954440	85173707	16	1
ENSMUSG00000022893	16	85793827	85803113	13	1
ENSMUSG00000022897	16	94570010	94695517	23	1
ENSMUSG00000022899	16	36750178	36784962	47	1
ENSMUSG00000022905	16	35978750	36037131	35	4
ENSMUSG00000022912	16	62854307	62929346	19	1
ENSMUSG00000022914	16	95992092	96082526	67	2
ENSMUSG00000022957	16	91729281	91920597	89	9
ENSMUSG00000022960 ENSMUSG00000022956	16	91677268	91931687	39	1
ENSMUSG00000022961	16	91647506	91679221	42	2
ENSMUSG00000022964	16	91574503	91597800	10	6
ENSMUSG00000022973	16	90936092	91011308	54	2
ENSMUSG00000022982	16	90220742	90226322	5	2
ENSMUSG00000022992	15	98518821	98534244	15	2
ENSMUSG00000022995	1	181896384	182019990	47	2
ENSMUSG00000023010	15	99392882	99410049	28	3
ENSMUSG00000023020	15	99725618	99728136	2	2
ENSMUSG00000023021	15	99734881	99772885	24	1
ENSMUSG00000023025	15	99970074	100016351	18	2
ENSMUSG00000023026	15	100038664	100219473	44	1
ENSMUSG00000023032	15	100761747	100823968	38	6
ENSMUSG00000023044	15	102176998	102189043	15	1
ENSMUSG00000023068	10	52417547	52440192	7	2
ENSMUSG00000023088	16	14361558	14475737	52	1
ENSMUSG00000023089	6	24518666	24528013	10	3
ENSMUSG00000023094	2	19371440	19394976	11	2
ENSMUSG00000023110	14	54507187	54517525	33	1
ENSMUSG00000023118	7	19024377	19054618	45	1
ENSMUSG00000023150	1	151344477	151364422	24	1
ENSMUSG00000023169	15	96571418	96642913	18	2
ENSMUSG00000023175	10	79704491	79711969	21	2
ENSMUSG00000023236	2	113776362	113829121	8	5
ENSMUSG00000023277	9	106203108	106215389	20	1
ENSMUSG00000023353	5	24452177	24502047	18	2
ENSMUSG00000023456	6	124810586	124814296	18	2
ENSMUSG00000023460	17	66494512	66519717	14	1
ENSMUSG00000023473 ENSMUSG00000093067	9	108826320	108852969	50	1
ENSMUSG00000023495	9	106453291	106464012	54	2
ENSMUSG00000023827	17	12118704	12219645	19	1
ENSMUSG00000023830	17	12682406	12769664	54	2
ENSMUSG00000023845	17	17527723	17624489	18	1
ENSMUSG00000023852	17	15704967	15772610	46	1
ENSMUSG00000023861	17	8282904	8297661	24	1
ENSMUSG00000023868	17	8525372	8986648	44	1
ENSMUSG00000023904	17	23673596	23675227	9	2
ENSMUSG00000023909	17	23736186	23740330	3	3
ENSMUSG00000023913	17	43568098	43612201	24	4
ENSMUSG00000023923	17	50733127	51179349	22	1
ENSMUSG00000023927 ENSMUSG00000103779	17	51736187	51833290	42	6
ENSMUSG00000023944	17	45567775	45573271	29	12
ENSMUSG00000023965	17	63057452	63500017	17	3
ENSMUSG00000023967	17	46110986	46128910	17	2
ENSMUSG00000023973	17	46735705	46752214	14	3
ENSMUSG00000023977	17	46928292	47010532	48	3
ENSMUSG00000023984 ENSMUSG00000090115 ENSMUSG00000092558	17	47611582	47686738	34	6
ENSMUSG00000024007	17	29250803	29264158	11	1
ENSMUSG00000024012	17	29332072	29347904	26	10
ENSMUSG00000024030	17	31057698	31115777	17	1
ENSMUSG00000024038	17	31520115	31531326	12	1
ENSMUSG00000024045	17	32303676	32321153	14	1
ENSMUSG00000024054	17	71344489	71475343	65	6
ENSMUSG00000024059	17	71781947	71858351	16	1
ENSMUSG00000024063	17	72918305	72941942	5	2
ENSMUSG00000024068	17	74338987	74391113	17	3
ENSMUSG00000024073	17	74528295	74703356	122	2
ENSMUSG00000024074	17	78200248	78376592	17	1
ENSMUSG00000024083	17	64281005	64331916	14	4
ENSMUSG00000024095	17	80029487	80062334	27	1
ENSMUSG00000024096	17	65848433	65885755	11	2
ENSMUSG00000024098	17	65923066	65951187	5	2
ENSMUSG00000024104	6	116208033	116262668	31	9
ENSMUSG00000024109	17	90033644	91092805	58	12
ENSMUSG00000024120	17	84705247	84790789	54	6
ENSMUSG00000024121	17	24163866	24169702	15	1
ENSMUSG00000024122	17	24073680	24150924	36	1
ENSMUSG00000024130	17	24351950	24410201	46	1
ENSMUSG00000024146	17	87025550	87035810	11	1
ENSMUSG00000024151	17	87672330	87723713	25	3
ENSMUSG00000024158	17	24840143	24864450	23	5
ENSMUSG00000024163 ENSMUSG00000073436	17	24888486	24936977	111	12
ENSMUSG00000024186	17	26202951	26211324	44	1
ENSMUSG00000024213	17	27579382	27623465	20	1
ENSMUSG00000024231	18	3382988	3436377	32	3
ENSMUSG00000024238	18	5591860	5775467	32	1
ENSMUSG00000024242	17	80580512	80728093	36	1
ENSMUSG00000024256	17	93199422	93205485	5	1
ENSMUSG00000024259	18	31580168	31609902	8	4
ENSMUSG00000024260	18	31634371	31723061	26	2
ENSMUSG00000024261	18	31437808	31447415	4	2
ENSMUSG00000024268	18	25477632	25753983	14	4
ENSMUSG00000024270	18	24579881	24603817	17	1
ENSMUSG00000024283	18	7868832	7973547	55	2
ENSMUSG00000024286	18	9314044	9450150	10	1
ENSMUSG00000024293	18	10566602	10610352	19	2
ENSMUSG00000024294	18	10725548	10818704	34	2
ENSMUSG00000024298	17	32771236	32788287	8	1
ENSMUSG00000024302	18	23415415	23659714	22	3
ENSMUSG00000024304	18	16588877	16809246	20	3
ENSMUSG00000024309	17	33938821	33940343	17	1
ENSMUSG00000024317	18	21001341	21028223	8	1
ENSMUSG00000024319	17	33955812	33966984	30	1
ENSMUSG00000024335	17	34112023	34122634	44	4
ENSMUSG00000024347	18	35964830	36014715	28	2
ENSMUSG00000024350	18	35671103	35703144	8	1
ENSMUSG00000024359	18	34937414	34954357	26	12
ENSMUSG00000024360	18	34902785	34932007	12	4
ENSMUSG00000024381	18	32377217	32435736	19	3
ENSMUSG00000024387	17	35116196	35122053	26	1
ENSMUSG00000024393	17	35149076	35164897	44	3
ENSMUSG00000024403	17	35233660	35238767	14	1
ENSMUSG00000024410	18	12168717	12189997	40	3
ENSMUSG00000024422	17	35879819	35892670	36	1
ENSMUSG00000024424	18	12599926	12737050	19	1
ENSMUSG00000024425	18	38418975	38464399	8	1
ENSMUSG00000024429	17	35979851	35989462	14	3
ENSMUSG00000024431	18	39410545	39491301	25	2
ENSMUSG00000024462	17	37045966	37075067	44	6
ENSMUSG00000024472	18	44380500	44424969	11	1
ENSMUSG00000024474	18	36744656	36757639	20	2
ENSMUSG00000024479	15	54571366	54602846	4	3
ENSMUSG00000024500	18	42637432	43059471	22	1
ENSMUSG00000024501	18	43320979	43438286	25	1
ENSMUSG00000024511	18	69979131	70141605	12	3
ENSMUSG00000024515	18	73639009	73703780	23	3
ENSMUSG00000024516	18	65800549	65817665	21	8
ENSMUSG00000024528	18	52465693	52490738	8	2
ENSMUSG00000024544	18	67933257	68255549	6	3
ENSMUSG00000024558	18	73928486	74065359	12	1
ENSMUSG00000024563	18	76241580	76305731	22	1
ENSMUSG00000024566	18	80734143	80934058	29	1
ENSMUSG00000024571 ENSMUSG00000057130	18	80206765	80223533	32	2
ENSMUSG00000024576	18	61555274	61590061	32	6
ENSMUSG00000024583	18	63662801	63692359	8	1
ENSMUSG00000024587	18	64499665	64516557	15	2
ENSMUSG00000024589	18	64887756	65217826	32	1
ENSMUSG00000024593	18	57133090	57297467	27	1
ENSMUSG00000024597	18	57878678	57946821	27	3
ENSMUSG00000024601	18	58659482	58679570	5	1
ENSMUSG00000024614	18	90510154	90543267	16	1
ENSMUSG00000024617	18	60925618	60988152	30	9
ENSMUSG00000024622	18	61131279	61177050	21	1
ENSMUSG00000024639	19	16132831	16387463	11	2
ENSMUSG00000024642	19	14448072	14598051	23	1
ENSMUSG00000024646	18	84851338	84880401	14	1
ENSMUSG00000024654	19	9109868	9135636	10	1
ENSMUSG00000024712	19	17394043	17401349	8	1
ENSMUSG00000024735	19	10895231	10909559	34	2
ENSMUSG00000024742	19	10199132	10204169	10	1
ENSMUSG00000024743	19	10389090	10453181	12	1
ENSMUSG00000024750	19	21272278	21282289	17	2
ENSMUSG00000024758	19	7425901	7483289	12	1
ENSMUSG00000024787	19	6119399	6128304	20	1
ENSMUSG00000024789	19	29251828	29313080	25	2
ENSMUSG00000024805	19	36379067	36456192	10	1
ENSMUSG00000024811	19	36834232	36893477	44	1
ENSMUSG00000024817	19	30030513	30093722	29	1
ENSMUSG00000024853	19	5273923	5295455	21	5
ENSMUSG00000024855	19	5133688	5273119	24	2
ENSMUSG00000024862	19	5107746	5118560	37	2
ENSMUSG00000024867	19	24294794	24555872	22	2
ENSMUSG00000024896	19	32485769	32515370	5	1
ENSMUSG00000024897	19	23758876	23949597	13	1
ENSMUSG00000024901	19	4930651	4943127	20	2
ENSMUSG00000024908	19	3454933	3575749	25	4
ENSMUSG00000024921	19	26605115	26778321	68	5
ENSMUSG00000024924	19	27216484	27254231	35	1
ENSMUSG00000024926	19	5603017	5610094	14	1
ENSMUSG00000024935	19	28835049	28913960	20	4
ENSMUSG00000024943	19	23206441	23273897	24	1
ENSMUSG00000024947	19	6334979	6340891	37	1
ENSMUSG00000024958	19	6938069	6942450	17	2
ENSMUSG00000024974	19	53600398	53645833	33	5
ENSMUSG00000024975	19	53892231	53929861	15	3
ENSMUSG00000024982	19	55298301	55316032	11	1
ENSMUSG00000024983	19	55316351	55626561	8	5
ENSMUSG00000024991	19	60761116	60790693	22	3
ENSMUSG00000024999	19	38788128	38819237	21	2
ENSMUSG00000025016	19	41210842	41264004	15	8
ENSMUSG00000025019	19	41482645	41562246	10	1
ENSMUSG00000025027	19	52943417	53040214	45	1
ENSMUSG00000025034	19	46501648	46516444	6	2
ENSMUSG00000025037	X	16619698	16687818	15	1
ENSMUSG00000025040	X	17556564	17572325	14	1
ENSMUSG00000025041	19	46886831	47015153	23	1
ENSMUSG00000025060	19	47579678	47645246	28	2
ENSMUSG00000025066	19	47731756	47735588	4	1
ENSMUSG00000025085	19	57032733	57314919	69	1
ENSMUSG00000025103	7	81792075	81829431	8	3
ENSMUSG00000025139	7	141874813	141918507	13	2
ENSMUSG00000025155	11	120789201	120796403	35	1
ENSMUSG00000025156	11	120784272	120789102	27	1
ENSMUSG00000025162	11	120961749	120991330	25	1
ENSMUSG00000025173	11	121327224	121354445	18	1
ENSMUSG00000025189	19	43440436	43497212	11	5
ENSMUSG00000025199	19	44073335	44107480	37	2
ENSMUSG00000025203 ENSMUSG00000093315	19	44293676	44306864	8	4
ENSMUSG00000025208	19	45005014	45006442	3	1
ENSMUSG00000025220	19	45750261	45783520	16	1
ENSMUSG00000025232	9	59539667	59565105	14	4
ENSMUSG00000025234	9	59388258	59486618	27	2
ENSMUSG00000025235	9	59321966	59353508	16	3
ENSMUSG00000025240	9	123529882	123592598	20	5
ENSMUSG00000025245	9	123694416	123717625	27	2
ENSMUSG00000025246	X	77511013	77662983	23	2
ENSMUSG00000025266	X	150983141	151017322	27	14
ENSMUSG00000025268	X	150806370	150814345	36	1
ENSMUSG00000025277	14	8002902	8056555	11	2
ENSMUSG00000025283	X	155213132	155216449	20	2
ENSMUSG00000025316	8	121949750	122029258	49	2
ENSMUSG00000025321	12	119158022	119238802	18	1
ENSMUSG00000025326	7	59228752	59306727	13	4
ENSMUSG00000025332	X	152233020	152274535	40	1
ENSMUSG00000025337	5	130245731	130255530	10	2
ENSMUSG00000025354	10	128805676	128819446	7	1
ENSMUSG00000025364	10	128557766	128565934	20	1
ENSMUSG00000025369	10	128459236	128490173	30	5
ENSMUSG00000025370	15	16778101	16857094	11	1
ENSMUSG00000025371	11	119913441	119919548	20	2
ENSMUSG00000025372	11	119942763	120006782	27	1
ENSMUSG00000025374	10	128401395	128411492	28	1
ENSMUSG00000025375	11	120007313	120047167	30	1
ENSMUSG00000025393	10	128083273	128090391	29	2
ENSMUSG00000025404	10	127380327	127499384	66	6
ENSMUSG00000025410	10	127266262	127281959	14	3
ENSMUSG00000025413	4	106662256	106678944	28	1
ENSMUSG00000025417	10	127197067	127211622	10	1
ENSMUSG00000025422	10	127078907	127093169	19	2
ENSMUSG00000025423	18	77065208	77155708	16	1
ENSMUSG00000025428	18	77773729	77782869	24	7
ENSMUSG00000025437	3	152346478	152393612	35	6
ENSMUSG00000025439	7	97696634	97718879	9	3
ENSMUSG00000025466	7	140096770	140102441	32	9
ENSMUSG00000025474	7	139995955	140036350	18	2
ENSMUSG00000025475	7	139834174	139878088	12	2
ENSMUSG00000025503	7	141392199	141402968	13	1
ENSMUSG00000025505	7	141327739	141337156	23	1
ENSMUSG00000025531	X	113040593	113185517	22	1
ENSMUSG00000025544	14	122107038	122159604	21	5
ENSMUSG00000025551	14	123977907	124677127	7	2
ENSMUSG00000025558	14	121542039	121797734	56	1
ENSMUSG00000025571	11	117654289	117763439	34	2
ENSMUSG00000025576	11	118489762	118911597	31	9
[truncated: 2,599 more rows]

## Sheet: GFstim_exGFstim
geneID	chr	start	end	total_exons	exon_changes
[truncated: 13 more rows]
