# Supplementary material for: Social interaction-induced activation of RNA splicing in the amygdala of microbiome-deficient mice
Source: eLife. 2018 May 29;7:e33070. doi: 10.7554/eLife.33070 (PMC5995540; doi:10.7554/eLife.33070)
Supplement: Supplementary file 5. [file elife-33070-supp5.xlsx]

## Sheet: CON-GF
Category	Term	Count	PValue	Genes	Fold Enrichment	FDR [%]	FDR faction
KEGG_PATHWAY	mmu04720:Long-term potentiation	17	1.96639e-07	ENSMUSG00000000441, ENSMUSG00000053819, ENSMUSG00000028161, ENSMUSG00000063358, ENSMUSG00000030102, ENSMUSG00000033981, ENSMUSG00000005034, ENSMUSG00000078816, ENSMUSG00000019370, ENSMUSG00000030209, ENSMUSG00000024639, ENSMUSG00000024617, ENSMUSG00000014956, ENSMUSG00000036438, ENSMUSG00000026959, ENSMUSG00000014077, ENSMUSG00000063065, ENSMUSG00000051177	4.87243	0.000231133	2.31133e-06
KEGG_PATHWAY	mmu04540:Gap junction	16	1.70546e-05	ENSMUSG00000000441, ENSMUSG00000027523, ENSMUSG00000072235, ENSMUSG00000063358, ENSMUSG00000030102, ENSMUSG00000023004, ENSMUSG00000059923, ENSMUSG00000005034, ENSMUSG00000032562, ENSMUSG00000078816, ENSMUSG00000027646, ENSMUSG00000024639, ENSMUSG00000025162, ENSMUSG00000025856, ENSMUSG00000063065, ENSMUSG00000051177	3.73264	0.0200444	0.000200444
KEGG_PATHWAY	mmu04730:Long-term depression	14	4.29056e-05	ENSMUSG00000000441, ENSMUSG00000001986, ENSMUSG00000027523, ENSMUSG00000034656, ENSMUSG00000063358, ENSMUSG00000030102, ENSMUSG00000033981, ENSMUSG00000032562, ENSMUSG00000078816, ENSMUSG00000024639, ENSMUSG00000031748, ENSMUSG00000020349, ENSMUSG00000063065, ENSMUSG00000051177	3.90113	0.0504203	0.000504203
KEGG_PATHWAY	mmu05016:Huntington's disease	22	0.000255589	ENSMUSG00000024099, ENSMUSG00000002957, ENSMUSG00000035152, ENSMUSG00000042557, ENSMUSG00000031865, ENSMUSG00000030102, ENSMUSG00000020402, ENSMUSG00000025781, ENSMUSG00000020886, ENSMUSG00000018770, ENSMUSG00000030209, ENSMUSG00000006057, ENSMUSG00000000563, ENSMUSG00000024639, ENSMUSG00000047126, ENSMUSG00000022841, ENSMUSG00000026959, ENSMUSG00000022982, ENSMUSG00000031818, ENSMUSG00000025393,…	2.41194	0.300011	0.00300011
KEGG_PATHWAY	mmu05214:Glioma	12	0.000263511	ENSMUSG00000000441, ENSMUSG00000053819, ENSMUSG00000036438, ENSMUSG00000027665, ENSMUSG00000063358, ENSMUSG00000019699, ENSMUSG00000025856, ENSMUSG00000059923, ENSMUSG00000078816, ENSMUSG00000019370, ENSMUSG00000013663, ENSMUSG00000024617, ENSMUSG00000063065	3.7618	0.309297	0.00309297
KEGG_PATHWAY	mmu04666:Fc gamma R-mediated phagocytosis	15	0.000303166	ENSMUSG00000000441, ENSMUSG00000027665, ENSMUSG00000029621, ENSMUSG00000019699, ENSMUSG00000063358, ENSMUSG00000028517, ENSMUSG00000078816, ENSMUSG00000020516, ENSMUSG00000022377, ENSMUSG00000045038, ENSMUSG00000021314, ENSMUSG00000056201, ENSMUSG00000028126, ENSMUSG00000040265, ENSMUSG00000063065	3.07086	0.355766	0.00355766
KEGG_PATHWAY	mmu04020:Calcium signaling pathway	22	0.000460286	ENSMUSG00000027523, ENSMUSG00000053819, ENSMUSG00000034656, ENSMUSG00000028161, ENSMUSG00000030102, ENSMUSG00000020402, ENSMUSG00000005034, ENSMUSG00000024524, ENSMUSG00000078816, ENSMUSG00000019370, ENSMUSG00000024639, ENSMUSG00000024617, ENSMUSG00000004113, ENSMUSG00000030302, ENSMUSG00000036438, ENSMUSG00000026959, ENSMUSG00000026463, ENSMUSG00000014077, ENSMUSG00000032773, ENSMUSG00000008892,…	2.31091	0.539691	0.00539691
KEGG_PATHWAY	mmu04114:Oocyte meiosis	16	0.000509376	ENSMUSG00000053819, ENSMUSG00000028161, ENSMUSG00000063358, ENSMUSG00000030102, ENSMUSG00000029472, ENSMUSG00000018326, ENSMUSG00000005034, ENSMUSG00000019370, ENSMUSG00000025586, ENSMUSG00000024617, ENSMUSG00000014956, ENSMUSG00000036438, ENSMUSG00000020271, ENSMUSG00000014077, ENSMUSG00000029686, ENSMUSG00000020349, ENSMUSG00000063065	2.79137	0.597092	0.00597092
KEGG_PATHWAY	mmu05010:Alzheimer's disease	21	0.00063195	ENSMUSG00000024099, ENSMUSG00000040249, ENSMUSG00000037032, ENSMUSG00000028161, ENSMUSG00000063358, ENSMUSG00000030102, ENSMUSG00000025781, ENSMUSG00000002985, ENSMUSG00000018770, ENSMUSG00000019370, ENSMUSG00000030209, ENSMUSG00000006057, ENSMUSG00000000563, ENSMUSG00000024639, ENSMUSG00000036438, ENSMUSG00000026959, ENSMUSG00000031818, ENSMUSG00000014077, ENSMUSG00000025393, ENSMUSG00000057666,…	2.31495	0.740285	0.00740285
KEGG_PATHWAY	mmu04960:Aldosterone-regulated sodium reabsorption	9	0.000904025	ENSMUSG00000026576, ENSMUSG00000040907, ENSMUSG00000031618, ENSMUSG00000027665, ENSMUSG00000024122, ENSMUSG00000063358, ENSMUSG00000078816, ENSMUSG00000063065, ENSMUSG00000007097	4.2992	1.05746	0.0105746
KEGG_PATHWAY	mmu04120:Ubiquitin mediated proteolysis	17	0.0010577	ENSMUSG00000025261, ENSMUSG00000025860, ENSMUSG00000079323, ENSMUSG00000038664, ENSMUSG00000032596, ENSMUSG00000024073, ENSMUSG00000029472, ENSMUSG00000039000, ENSMUSG00000026219, ENSMUSG00000051234, ENSMUSG00000004364, ENSMUSG00000018548, ENSMUSG00000032216, ENSMUSG00000020271, ENSMUSG00000029203, ENSMUSG00000029686, ENSMUSG00000031446, ENSMUSG00000039159	2.50787	1.23619	0.0123619
KEGG_PATHWAY	mmu04070:Phosphatidylinositol signaling system	12	0.00106709	ENSMUSG00000025417, ENSMUSG00000036438, ENSMUSG00000022973, ENSMUSG00000029330, ENSMUSG00000027665, ENSMUSG00000026113, ENSMUSG00000030102, ENSMUSG00000028126, ENSMUSG00000041720, ENSMUSG00000078816, ENSMUSG00000019370, ENSMUSG00000013663, ENSMUSG00000051177	3.21007	1.2471	0.012471
KEGG_PATHWAY	mmu04144:Endocytosis	21	0.00230189	ENSMUSG00000002957, ENSMUSG00000035152, ENSMUSG00000037126, ENSMUSG00000028528, ENSMUSG00000032870, ENSMUSG00000027646, ENSMUSG00000033916, ENSMUSG00000027255, ENSMUSG00000032216, ENSMUSG00000020817, ENSMUSG00000047126, ENSMUSG00000022841, ENSMUSG00000022377, ENSMUSG00000031242, ENSMUSG00000028126, ENSMUSG00000017639, ENSMUSG00000035203, ENSMUSG00000028552, ENSMUSG00000040265, ENSMUSG00000037643,…	2.08575	2.67244	0.0267244
KEGG_PATHWAY	mmu04912:GnRH signaling pathway	13	0.00288196	ENSMUSG00000000441, ENSMUSG00000027523, ENSMUSG00000053819, ENSMUSG00000063358, ENSMUSG00000030102, ENSMUSG00000059923, ENSMUSG00000005034, ENSMUSG00000019370, ENSMUSG00000027646, ENSMUSG00000024639, ENSMUSG00000024617, ENSMUSG00000036438, ENSMUSG00000051177, ENSMUSG00000063065	2.68885	3.3355	0.033355
KEGG_PATHWAY	mmu04910:Insulin signaling pathway	16	0.00330502	ENSMUSG00000000441, ENSMUSG00000061981, ENSMUSG00000027665, ENSMUSG00000019699, ENSMUSG00000063358, ENSMUSG00000059923, ENSMUSG00000005034, ENSMUSG00000019370, ENSMUSG00000014956, ENSMUSG00000020516, ENSMUSG00000020612, ENSMUSG00000036438, ENSMUSG00000024122, ENSMUSG00000028944, ENSMUSG00000059714, ENSMUSG00000037643, ENSMUSG00000063065	2.32614	3.81648	0.0381648
KEGG_PATHWAY	mmu04012:ErbB signaling pathway	12	0.00359598	ENSMUSG00000000441, ENSMUSG00000020516, ENSMUSG00000053819, ENSMUSG00000027665, ENSMUSG00000063358, ENSMUSG00000019699, ENSMUSG00000059923, ENSMUSG00000078816, ENSMUSG00000027646, ENSMUSG00000022607, ENSMUSG00000024617, ENSMUSG00000063065	2.7673	4.146	0.04146
KEGG_PATHWAY	mmu04916:Melanogenesis	13	0.00371937	ENSMUSG00000000441, ENSMUSG00000027523, ENSMUSG00000053819, ENSMUSG00000036438, ENSMUSG00000031748, ENSMUSG00000063358, ENSMUSG00000005034, ENSMUSG00000078816, ENSMUSG00000032562, ENSMUSG00000019370, ENSMUSG00000051177, ENSMUSG00000024617, ENSMUSG00000063065, ENSMUSG00000024639	2.60818	4.28542	0.0428542
KEGG_PATHWAY	mmu05213:Endometrial cancer	9	0.00374718	ENSMUSG00000000441, ENSMUSG00000027665, ENSMUSG00000024122, ENSMUSG00000063358, ENSMUSG00000063063, ENSMUSG00000019699, ENSMUSG00000059923, ENSMUSG00000013663, ENSMUSG00000063065	3.47243	4.31682	0.0431682
KEGG_PATHWAY	mmu05223:Non-small cell lung cancer	9	0.00475495	ENSMUSG00000000441, ENSMUSG00000027665, ENSMUSG00000018209, ENSMUSG00000024122, ENSMUSG00000063358, ENSMUSG00000019699, ENSMUSG00000059923, ENSMUSG00000078816, ENSMUSG00000063065	3.34382	5.44833	0.0544833
KEGG_PATHWAY	mmu04150:mTOR signaling pathway	9	0.00475495	ENSMUSG00000020516, ENSMUSG00000021109, ENSMUSG00000027665, ENSMUSG00000024122, ENSMUSG00000063358, ENSMUSG00000019699, ENSMUSG00000029512, ENSMUSG00000058655, ENSMUSG00000063065	3.34382	5.44833	0.0544833
KEGG_PATHWAY	mmu04010:MAPK signaling pathway	24	0.00597014	ENSMUSG00000000441, ENSMUSG00000030854, ENSMUSG00000024242, ENSMUSG00000017376, ENSMUSG00000018209, ENSMUSG00000040118, ENSMUSG00000034656, ENSMUSG00000028161, ENSMUSG00000019699, ENSMUSG00000063358, ENSMUSG00000059923, ENSMUSG00000005034, ENSMUSG00000062232, ENSMUSG00000078816, ENSMUSG00000022619, ENSMUSG00000027104, ENSMUSG00000004113, ENSMUSG00000032356, ENSMUSG00000014077, ENSMUSG00000025856,…	1.81702	6.79645	0.0679645
KEGG_PATHWAY	mmu04270:Vascular smooth muscle contraction	14	0.006245	ENSMUSG00000000441, ENSMUSG00000027523, ENSMUSG00000063358, ENSMUSG00000030102, ENSMUSG00000005034, ENSMUSG00000078816, ENSMUSG00000019370, ENSMUSG00000024639, ENSMUSG00000014956, ENSMUSG00000045038, ENSMUSG00000036438, ENSMUSG00000059495, ENSMUSG00000041977, ENSMUSG00000063065, ENSMUSG00000051177	2.34068	7.09892	0.0709892
GOTERM_BP_5	GO:0007268~synaptic transmission	34	6.62283e-12	ENSMUSG00000024897, ENSMUSG00000034593, ENSMUSG00000070570, ENSMUSG00000025892, ENSMUSG00000038486, ENSMUSG00000026103, ENSMUSG00000017740, ENSMUSG00000042429, ENSMUSG00000004113, ENSMUSG00000009394, ENSMUSG00000033615, ENSMUSG00000022973, ENSMUSG00000032773, ENSMUSG00000063063, ENSMUSG00000027273, ENSMUSG00000008892, ENSMUSG00000022607, ENSMUSG00000066392, ENSMUSG00000033577, ENSMUSG00000030806,…	4.10524	1.07495e-08	1.07495e-10
GOTERM_BP_5	GO:0044267~cellular protein metabolic process	151	6.92153e-09	ENSMUSG00000019428, ENSMUSG00000013236, ENSMUSG00000032399, ENSMUSG00000024969, ENSMUSG00000000740, ENSMUSG00000029512, ENSMUSG00000051234, ENSMUSG00000035764, ENSMUSG00000024639, ENSMUSG00000052155, ENSMUSG00000031066, ENSMUSG00000029686, ENSMUSG00000022263, ENSMUSG00000031446, ENSMUSG00000025290, ENSMUSG00000034613, ENSMUSG00000025314, ENSMUSG00000053819, ENSMUSG00000027646, ENSMUSG00000038429,…	1.55427	1.12343e-05	1.12343e-07
GOTERM_BP_5	GO:0050804~regulation of synaptic transmission	20	1.36594e-07	ENSMUSG00000021910, ENSMUSG00000033577, ENSMUSG00000041670, ENSMUSG00000034656, ENSMUSG00000028161, ENSMUSG00000033981, ENSMUSG00000020886, ENSMUSG00000032562, ENSMUSG00000025586, ENSMUSG00000030209, ENSMUSG00000024393, ENSMUSG00000032336, ENSMUSG00000024617, ENSMUSG00000042429, ENSMUSG00000030302, ENSMUSG00000032356, ENSMUSG00000037996, ENSMUSG00000026959, ENSMUSG00000032482, ENSMUSG00000028756	4.29842	0.000221706	2.21706e-06
GOTERM_BP_5	GO:0000902~cell morphogenesis	37	3.29155e-07	ENSMUSG00000020598, ENSMUSG00000024969, ENSMUSG00000037032, ENSMUSG00000018209, ENSMUSG00000021109, ENSMUSG00000029512, ENSMUSG00000033066, ENSMUSG00000028059, ENSMUSG00000004364, ENSMUSG00000028649, ENSMUSG00000005566, ENSMUSG00000035390, ENSMUSG00000039114, ENSMUSG00000063063, ENSMUSG00000022601, ENSMUSG00000033004, ENSMUSG00000022607, ENSMUSG00000037643, ENSMUSG00000031391, ENSMUSG00000022636,…	2.57349	0.000534252	5.34252e-06
GOTERM_BP_5	GO:0051969~regulation of transmission of nerve impulse	20	4.13939e-07	ENSMUSG00000021910, ENSMUSG00000033577, ENSMUSG00000041670, ENSMUSG00000034656, ENSMUSG00000028161, ENSMUSG00000033981, ENSMUSG00000020886, ENSMUSG00000032562, ENSMUSG00000025586, ENSMUSG00000030209, ENSMUSG00000024393, ENSMUSG00000032336, ENSMUSG00000024617, ENSMUSG00000042429, ENSMUSG00000030302, ENSMUSG00000032356, ENSMUSG00000037996, ENSMUSG00000026959, ENSMUSG00000032482, ENSMUSG00000028756	4.01722	0.000671863	6.71863e-06
GOTERM_BP_5	GO:0015031~protein transport	60	5.36162e-07	ENSMUSG00000017288, ENSMUSG00000024870, ENSMUSG00000041670, ENSMUSG00000017978, ENSMUSG00000031012, ENSMUSG00000036435, ENSMUSG00000079477, ENSMUSG00000028649, ENSMUSG00000032549, ENSMUSG00000027255, ENSMUSG00000022841, ENSMUSG00000026470, ENSMUSG00000061244, ENSMUSG00000015291, ENSMUSG00000034187, ENSMUSG00000030806, ENSMUSG00000035152, ENSMUSG00000021062, ENSMUSG00000030058, ENSMUSG00000022159,…	1.98084	0.000870242	8.70242e-06
GOTERM_BP_5	GO:0048666~neuron development	35	7.13102e-07	ENSMUSG00000020598, ENSMUSG00000015222, ENSMUSG00000037032, ENSMUSG00000029512, ENSMUSG00000033066, ENSMUSG00000024639, ENSMUSG00000039114, ENSMUSG00000063063, ENSMUSG00000027581, ENSMUSG00000056579, ENSMUSG00000022601, ENSMUSG00000033004, ENSMUSG00000022607, ENSMUSG00000024695, ENSMUSG00000031391, ENSMUSG00000013663, ENSMUSG00000037643, ENSMUSG00000022636, ENSMUSG00000033577, ENSMUSG00000079415,…	2.57611	0.00115743	1.15743e-05
GOTERM_BP_5	GO:0031644~regulation of neurological system process	20	9.89881e-07	ENSMUSG00000021910, ENSMUSG00000033577, ENSMUSG00000041670, ENSMUSG00000034656, ENSMUSG00000028161, ENSMUSG00000033981, ENSMUSG00000020886, ENSMUSG00000032562, ENSMUSG00000025586, ENSMUSG00000030209, ENSMUSG00000024393, ENSMUSG00000032336, ENSMUSG00000024617, ENSMUSG00000042429, ENSMUSG00000030302, ENSMUSG00000032356, ENSMUSG00000037996, ENSMUSG00000026959, ENSMUSG00000032482, ENSMUSG00000028756	3.80391	0.00160667	1.60667e-05
GOTERM_BP_5	GO:0006464~protein modification process	95	1.87389e-06	ENSMUSG00000000441, ENSMUSG00000013236, ENSMUSG00000024969, ENSMUSG00000020032, ENSMUSG00000032936, ENSMUSG00000028530, ENSMUSG00000035247, ENSMUSG00000018209, ENSMUSG00000020936, ENSMUSG00000029471, ENSMUSG00000031012, ENSMUSG00000029512, ENSMUSG00000051234, ENSMUSG00000024639, ENSMUSG00000040687, ENSMUSG00000071650, ENSMUSG00000032216, ENSMUSG00000052155, ENSMUSG00000017291, ENSMUSG00000022263,…	1.62044	0.00304147	3.04147e-05
GOTERM_BP_5	GO:0007242~intracellular signaling cascade	74	3.0097e-06	ENSMUSG00000000441, ENSMUSG00000024969, ENSMUSG00000004071, ENSMUSG00000024870, ENSMUSG00000025658, ENSMUSG00000028530, ENSMUSG00000079477, ENSMUSG00000041720, ENSMUSG00000024524, ENSMUSG00000029512, ENSMUSG00000057455, ENSMUSG00000028059, ENSMUSG00000024639, ENSMUSG00000020372, ENSMUSG00000040687, ENSMUSG00000032549, ENSMUSG00000043670, ENSMUSG00000029064, ENSMUSG00000027581, ENSMUSG00000015291,…	1.73816	0.00488493	4.88493e-05
GOTERM_BP_5	GO:0031175~neuron projection development	28	3.11039e-06	ENSMUSG00000020598, ENSMUSG00000015222, ENSMUSG00000037032, ENSMUSG00000029512, ENSMUSG00000033066, ENSMUSG00000039114, ENSMUSG00000027581, ENSMUSG00000063063, ENSMUSG00000022601, ENSMUSG00000033004, ENSMUSG00000022607, ENSMUSG00000013663, ENSMUSG00000031391, ENSMUSG00000022636, ENSMUSG00000033577, ENSMUSG00000026782, ENSMUSG00000034656, ENSMUSG00000022037, ENSMUSG00000069601, ENSMUSG00000042453,…	2.76046	0.00504836	5.04836e-05
GOTERM_BP_5	GO:0009966~regulation of signal transduction	58	3.97392e-06	ENSMUSG00000019428, ENSMUSG00000001986, ENSMUSG00000025658, ENSMUSG00000021109, ENSMUSG00000020176, ENSMUSG00000029512, ENSMUSG00000032870, ENSMUSG00000028059, ENSMUSG00000026883, ENSMUSG00000040687, ENSMUSG00000026360, ENSMUSG00000027255, ENSMUSG00000025555, ENSMUSG00000026159, ENSMUSG00000052155, ENSMUSG00000027581, ENSMUSG00000022263, ENSMUSG00000025656, ENSMUSG00000013663, ENSMUSG00000049044,…	1.88584	0.00644988	6.44988e-05
GOTERM_BP_5	GO:0016310~phosphorylation	60	1.2147e-05	ENSMUSG00000000441, ENSMUSG00000024969, ENSMUSG00000020032, ENSMUSG00000032936, ENSMUSG00000028530, ENSMUSG00000018209, ENSMUSG00000029471, ENSMUSG00000031012, ENSMUSG00000041720, ENSMUSG00000018770, ENSMUSG00000029512, ENSMUSG00000040687, ENSMUSG00000006057, ENSMUSG00000052155, ENSMUSG00000017291, ENSMUSG00000022263, ENSMUSG00000022607, ENSMUSG00000052459, ENSMUSG00000053819, ENSMUSG00000026782,…	1.796	0.019714	0.00019714
GOTERM_BP_5	GO:0006886~intracellular protein transport	31	1.28461e-05	ENSMUSG00000024897, ENSMUSG00000002957, ENSMUSG00000041670, ENSMUSG00000000538, ENSMUSG00000031012, ENSMUSG00000079477, ENSMUSG00000063801, ENSMUSG00000018326, ENSMUSG00000028649, ENSMUSG00000027438, ENSMUSG00000022841, ENSMUSG00000026470, ENSMUSG00000026553, ENSMUSG00000000531, ENSMUSG00000030806, ENSMUSG00000033577, ENSMUSG00000035152, ENSMUSG00000032382, ENSMUSG00000030058, ENSMUSG00000028161,…	2.41397	0.0208485	0.000208485
GOTERM_BP_5	GO:0001505~regulation of neurotransmitter levels	13	2.30477e-05	ENSMUSG00000070570, ENSMUSG00000034656, ENSMUSG00000070880, ENSMUSG00000004113, ENSMUSG00000020894, ENSMUSG00000009394, ENSMUSG00000022973, ENSMUSG00000033615, ENSMUSG00000035864, ENSMUSG00000027273, ENSMUSG00000057880, ENSMUSG00000066392, ENSMUSG00000007097	4.50641	0.0374023	0.000374023
GOTERM_BP_5	GO:0043632~modification-dependent macromolecule catabolic process	45	4.80082e-05	ENSMUSG00000005371, ENSMUSG00000025261, ENSMUSG00000036748, ENSMUSG00000031154, ENSMUSG00000030816, ENSMUSG00000044308, ENSMUSG00000035247, ENSMUSG00000003813, ENSMUSG00000060450, ENSMUSG00000029472, ENSMUSG00000071533, ENSMUSG00000066036, ENSMUSG00000004364, ENSMUSG00000051234, ENSMUSG00000035764, ENSMUSG00000019505, ENSMUSG00000032216, ENSMUSG00000031066, ENSMUSG00000029686, ENSMUSG00000033004,…	1.90383	0.0778937	0.000778937
GOTERM_BP_5	GO:0000904~cell morphogenesis involved in differentiation	25	4.88318e-05	ENSMUSG00000022636, ENSMUSG00000020598, ENSMUSG00000037032, ENSMUSG00000021109, ENSMUSG00000034656, ENSMUSG00000069601, ENSMUSG00000029512, ENSMUSG00000004364, ENSMUSG00000042453, ENSMUSG00000030302, ENSMUSG00000068748, ENSMUSG00000027797, ENSMUSG00000005566, ENSMUSG00000035033, ENSMUSG00000026764, ENSMUSG00000026442, ENSMUSG00000022982, ENSMUSG00000039114, ENSMUSG00000063063, ENSMUSG00000022601,…	2.53445	0.0792296	0.000792296
GOTERM_BP_5	GO:0032940~secretion by cell	23	5.15894e-05	ENSMUSG00000024897, ENSMUSG00000021910, ENSMUSG00000033577, ENSMUSG00000034799, ENSMUSG00000034593, ENSMUSG00000041670, ENSMUSG00000017978, ENSMUSG00000019790, ENSMUSG00000034656, ENSMUSG00000036435, ENSMUSG00000020894, ENSMUSG00000004113, ENSMUSG00000038453, ENSMUSG00000009394, ENSMUSG00000022973, ENSMUSG00000033615, ENSMUSG00000061244, ENSMUSG00000035864, ENSMUSG00000027273, ENSMUSG00000025867,…	2.65763	0.0837019	0.000837019
GOTERM_BP_5	GO:0051056~regulation of small GTPase mediated signal transduction	26	5.80088e-05	ENSMUSG00000019852, ENSMUSG00000032870, ENSMUSG00000030134, ENSMUSG00000026883, ENSMUSG00000028059, ENSMUSG00000025555, ENSMUSG00000027255, ENSMUSG00000026159, ENSMUSG00000027581, ENSMUSG00000059495, ENSMUSG00000022263, ENSMUSG00000011831, ENSMUSG00000025656, ENSMUSG00000049044, ENSMUSG00000029602, ENSMUSG00000041992, ENSMUSG00000037126, ENSMUSG00000062232, ENSMUSG00000017132, ENSMUSG00000042453,…	2.45086	0.0941126	0.000941126
GOTERM_BP_5	GO:0048812~neuron projection morphogenesis	22	6.68715e-05	ENSMUSG00000022636, ENSMUSG00000020598, ENSMUSG00000037032, ENSMUSG00000034656, ENSMUSG00000022037, ENSMUSG00000069601, ENSMUSG00000029512, ENSMUSG00000033066, ENSMUSG00000042453, ENSMUSG00000068748, ENSMUSG00000027797, ENSMUSG00000035033, ENSMUSG00000026442, ENSMUSG00000026764, ENSMUSG00000039114, ENSMUSG00000063063, ENSMUSG00000022601, ENSMUSG00000033004, ENSMUSG00000022607, ENSMUSG00000030077,…	2.68651	0.108484	0.00108484
GOTERM_BP_5	GO:0044257~cellular protein catabolic process	46	8.62658e-05	ENSMUSG00000005371, ENSMUSG00000025261, ENSMUSG00000036748, ENSMUSG00000031154, ENSMUSG00000030816, ENSMUSG00000044308, ENSMUSG00000035247, ENSMUSG00000003813, ENSMUSG00000060450, ENSMUSG00000029472, ENSMUSG00000071533, ENSMUSG00000066036, ENSMUSG00000004364, ENSMUSG00000051234, ENSMUSG00000035764, ENSMUSG00000019505, ENSMUSG00000032216, ENSMUSG00000031066, ENSMUSG00000029686, ENSMUSG00000033004,…	1.84104	0.139926	0.00139926
GOTERM_BP_5	GO:0048667~cell morphogenesis involved in neuron differentiation	22	0.000108775	ENSMUSG00000022636, ENSMUSG00000020598, ENSMUSG00000037032, ENSMUSG00000034656, ENSMUSG00000069601, ENSMUSG00000029512, ENSMUSG00000042453, ENSMUSG00000068748, ENSMUSG00000030302, ENSMUSG00000027797, ENSMUSG00000035033, ENSMUSG00000026442, ENSMUSG00000026764, ENSMUSG00000022982, ENSMUSG00000039114, ENSMUSG00000063063, ENSMUSG00000022601, ENSMUSG00000033004, ENSMUSG00000022607, ENSMUSG00000030077,…	2.59795	0.176407	0.00176407
GOTERM_BP_5	GO:0048699~generation of neurons	43	0.000123283	ENSMUSG00000020598, ENSMUSG00000040785, ENSMUSG00000015222, ENSMUSG00000037032, ENSMUSG00000029512, ENSMUSG00000033066, ENSMUSG00000024639, ENSMUSG00000035390, ENSMUSG00000038331, ENSMUSG00000039114, ENSMUSG00000032238, ENSMUSG00000063063, ENSMUSG00000027581, ENSMUSG00000056579, ENSMUSG00000022601, ENSMUSG00000033004, ENSMUSG00000022607, ENSMUSG00000024695, ENSMUSG00000031391, ENSMUSG00000013663,…	1.85948	0.199913	0.00199913
GOTERM_BP_5	GO:0022008~neurogenesis	45	0.000171895	ENSMUSG00000020598, ENSMUSG00000040785, ENSMUSG00000015222, ENSMUSG00000031425, ENSMUSG00000037032, ENSMUSG00000029512, ENSMUSG00000033066, ENSMUSG00000024639, ENSMUSG00000035390, ENSMUSG00000038331, ENSMUSG00000039114, ENSMUSG00000032238, ENSMUSG00000063063, ENSMUSG00000027581, ENSMUSG00000056579, ENSMUSG00000036766, ENSMUSG00000022601, ENSMUSG00000033004, ENSMUSG00000022607, ENSMUSG00000024695,…	1.80102	0.278639	0.00278639
GOTERM_BP_5	GO:0006897~endocytosis	22	0.000172483	ENSMUSG00000040249, ENSMUSG00000002957, ENSMUSG00000033577, ENSMUSG00000024381, ENSMUSG00000040276, ENSMUSG00000034799, ENSMUSG00000006651, ENSMUSG00000037902, ENSMUSG00000055447, ENSMUSG00000033981, ENSMUSG00000020886, ENSMUSG00000029512, ENSMUSG00000017670, ENSMUSG00000020817, ENSMUSG00000022973, ENSMUSG00000079557, ENSMUSG00000031731, ENSMUSG00000021314, ENSMUSG00000046722, ENSMUSG00000030605,…	2.51504	0.27959	0.0027959
GOTERM_BP_5	GO:0009260~ribonucleotide biosynthetic process	16	0.000183481	ENSMUSG00000019302, ENSMUSG00000052459, ENSMUSG00000040907, ENSMUSG00000037685, ENSMUSG00000025781, ENSMUSG00000018770, ENSMUSG00000027823, ENSMUSG00000006057, ENSMUSG00000000563, ENSMUSG00000026576, ENSMUSG00000030302, ENSMUSG00000019087, ENSMUSG00000026463, ENSMUSG00000025393, ENSMUSG00000031432, ENSMUSG00000007097	3.09796	0.297393	0.00297393
GOTERM_BP_5	GO:0030163~protein catabolic process	46	0.000193812	ENSMUSG00000005371, ENSMUSG00000025261, ENSMUSG00000036748, ENSMUSG00000031154, ENSMUSG00000030816, ENSMUSG00000044308, ENSMUSG00000035247, ENSMUSG00000003813, ENSMUSG00000060450, ENSMUSG00000029472, ENSMUSG00000071533, ENSMUSG00000066036, ENSMUSG00000004364, ENSMUSG00000051234, ENSMUSG00000035764, ENSMUSG00000019505, ENSMUSG00000032216, ENSMUSG00000031066, ENSMUSG00000029686, ENSMUSG00000033004,…	1.77812	0.314113	0.00314113
GOTERM_BP_5	GO:0007269~neurotransmitter secretion	9	0.000196717	ENSMUSG00000020894, ENSMUSG00000004113, ENSMUSG00000009394, ENSMUSG00000022973, ENSMUSG00000033615, ENSMUSG00000035864, ENSMUSG00000034656, ENSMUSG00000027273, ENSMUSG00000066392	5.37303	0.318814	0.00318814
GOTERM_BP_5	GO:0007611~learning or memory	14	0.000223165	ENSMUSG00000021794, ENSMUSG00000037032, ENSMUSG00000040907, ENSMUSG00000026782, ENSMUSG00000023017, ENSMUSG00000020402, ENSMUSG00000078816, ENSMUSG00000030209, ENSMUSG00000037996, ENSMUSG00000022973, ENSMUSG00000026959, ENSMUSG00000021314, ENSMUSG00000008892, ENSMUSG00000007097	3.38078	0.361604	0.00361604
GOTERM_BP_5	GO:0055082~cellular chemical homeostasis	27	0.000309508	ENSMUSG00000031425, ENSMUSG00000034593, ENSMUSG00000040907, ENSMUSG00000025203, ENSMUSG00000021109, ENSMUSG00000038486, ENSMUSG00000002985, ENSMUSG00000064329, ENSMUSG00000024639, ENSMUSG00000042429, ENSMUSG00000037996, ENSMUSG00000029064, ENSMUSG00000037622, ENSMUSG00000052456, ENSMUSG00000032966, ENSMUSG00000028161, ENSMUSG00000034656, ENSMUSG00000030102, ENSMUSG00000030209, ENSMUSG00000030302,…	2.16525	0.50118	0.0050118
GOTERM_BP_5	GO:0032990~cell part morphogenesis	23	0.000350148	ENSMUSG00000022636, ENSMUSG00000020598, ENSMUSG00000037032, ENSMUSG00000034656, ENSMUSG00000022037, ENSMUSG00000069601, ENSMUSG00000029512, ENSMUSG00000033066, ENSMUSG00000042453, ENSMUSG00000068748, ENSMUSG00000027797, ENSMUSG00000035033, ENSMUSG00000026442, ENSMUSG00000026764, ENSMUSG00000039114, ENSMUSG00000063063, ENSMUSG00000019054, ENSMUSG00000022601, ENSMUSG00000033004, ENSMUSG00000022607,…	2.33169	0.566812	0.00566812
GOTERM_BP_5	GO:0051050~positive regulation of transport	17	0.000402473	ENSMUSG00000024294, ENSMUSG00000021794, ENSMUSG00000007617, ENSMUSG00000037902, ENSMUSG00000055447, ENSMUSG00000017978, ENSMUSG00000019699, ENSMUSG00000003814, ENSMUSG00000030209, ENSMUSG00000024393, ENSMUSG00000042429, ENSMUSG00000030302, ENSMUSG00000028756, ENSMUSG00000030605, ENSMUSG00000032011, ENSMUSG00000037643, ENSMUSG00000005089	2.76792	0.651256	0.00651256
GOTERM_BP_5	GO:0009142~nucleoside triphosphate biosynthetic process	14	0.000429508	ENSMUSG00000019302, ENSMUSG00000052459, ENSMUSG00000040907, ENSMUSG00000037685, ENSMUSG00000025781, ENSMUSG00000018770, ENSMUSG00000006057, ENSMUSG00000000563, ENSMUSG00000026576, ENSMUSG00000030302, ENSMUSG00000019087, ENSMUSG00000026463, ENSMUSG00000025393, ENSMUSG00000007097	3.16726	0.69486	0.0069486
GOTERM_BP_5	GO:0048858~cell projection morphogenesis	22	0.000462286	ENSMUSG00000022636, ENSMUSG00000020598, ENSMUSG00000037032, ENSMUSG00000034656, ENSMUSG00000022037, ENSMUSG00000069601, ENSMUSG00000029512, ENSMUSG00000033066, ENSMUSG00000042453, ENSMUSG00000068748, ENSMUSG00000027797, ENSMUSG00000035033, ENSMUSG00000026442, ENSMUSG00000026764, ENSMUSG00000039114, ENSMUSG00000063063, ENSMUSG00000022601, ENSMUSG00000033004, ENSMUSG00000022607, ENSMUSG00000030077,…	2.34073	0.747702	0.00747702
GOTERM_BP_5	GO:0043269~regulation of ion transport	11	0.00052331	ENSMUSG00000026276, ENSMUSG00000030302, ENSMUSG00000042429, ENSMUSG00000032216, ENSMUSG00000007617, ENSMUSG00000032966, ENSMUSG00000040118, ENSMUSG00000019699, ENSMUSG00000032562, ENSMUSG00000032011, ENSMUSG00000024393	3.81312	0.846009	0.00846009
GOTERM_BP_5	GO:0006887~exocytosis	15	0.000556346	ENSMUSG00000034799, ENSMUSG00000034593, ENSMUSG00000041670, ENSMUSG00000019790, ENSMUSG00000017978, ENSMUSG00000034656, ENSMUSG00000036435, ENSMUSG00000020894, ENSMUSG00000038453, ENSMUSG00000022973, ENSMUSG00000033615, ENSMUSG00000061244, ENSMUSG00000025867, ENSMUSG00000049044, ENSMUSG00000002741	2.93074	0.89919	0.0089919
GOTERM_BP_5	GO:0007409~axonogenesis	19	0.000565343	ENSMUSG00000022636, ENSMUSG00000020598, ENSMUSG00000037032, ENSMUSG00000069601, ENSMUSG00000029512, ENSMUSG00000042453, ENSMUSG00000068748, ENSMUSG00000027797, ENSMUSG00000035033, ENSMUSG00000026442, ENSMUSG00000026764, ENSMUSG00000039114, ENSMUSG00000063063, ENSMUSG00000022601, ENSMUSG00000033004, ENSMUSG00000022607, ENSMUSG00000030077, ENSMUSG00000031391, ENSMUSG00000024163	2.50522	0.913669	0.00913669
GOTERM_BP_5	GO:0006812~cation transport	41	0.000966248	ENSMUSG00000019302, ENSMUSG00000030685, ENSMUSG00000040907, ENSMUSG00000070570, ENSMUSG00000040118, ENSMUSG00000019194, ENSMUSG00000018770, ENSMUSG00000027340, ENSMUSG00000000563, ENSMUSG00000024617, ENSMUSG00000064329, ENSMUSG00000006057, ENSMUSG00000026576, ENSMUSG00000017740, ENSMUSG00000004113, ENSMUSG00000019087, ENSMUSG00000037996, ENSMUSG00000056258, ENSMUSG00000004110, ENSMUSG00000027130,…	1.71102	1.55683	0.0155683
GOTERM_BP_5	GO:0050801~ion homeostasis	27	0.00118573	ENSMUSG00000031425, ENSMUSG00000034593, ENSMUSG00000040907, ENSMUSG00000025203, ENSMUSG00000021109, ENSMUSG00000038486, ENSMUSG00000002985, ENSMUSG00000064329, ENSMUSG00000024639, ENSMUSG00000042429, ENSMUSG00000037996, ENSMUSG00000029064, ENSMUSG00000052456, ENSMUSG00000032966, ENSMUSG00000026904, ENSMUSG00000028161, ENSMUSG00000034656, ENSMUSG00000030102, ENSMUSG00000030209, ENSMUSG00000030302,…	1.9805	1.90728	0.0190728
GOTERM_BP_5	GO:0009150~purine ribonucleotide metabolic process	15	0.0012222	ENSMUSG00000019302, ENSMUSG00000052459, ENSMUSG00000040907, ENSMUSG00000037685, ENSMUSG00000025781, ENSMUSG00000018770, ENSMUSG00000027823, ENSMUSG00000006057, ENSMUSG00000000563, ENSMUSG00000026576, ENSMUSG00000030302, ENSMUSG00000019087, ENSMUSG00000026463, ENSMUSG00000025393, ENSMUSG00000007097	2.70909	1.9654	0.019654
GOTERM_BP_5	GO:0009144~purine nucleoside triphosphate metabolic process	14	0.00123011	ENSMUSG00000019302, ENSMUSG00000052459, ENSMUSG00000040907, ENSMUSG00000037685, ENSMUSG00000025781, ENSMUSG00000018770, ENSMUSG00000006057, ENSMUSG00000000563, ENSMUSG00000026576, ENSMUSG00000030302, ENSMUSG00000019087, ENSMUSG00000026463, ENSMUSG00000025393, ENSMUSG00000007097	2.83858	1.978	0.01978
GOTERM_BP_5	GO:0015986~ATP synthesis coupled proton transport	8	0.00137091	ENSMUSG00000019087, ENSMUSG00000019302, ENSMUSG00000052459, ENSMUSG00000025393, ENSMUSG00000025781, ENSMUSG00000018770, ENSMUSG00000006057, ENSMUSG00000000563	4.64694	2.20204	0.0220204
GOTERM_BP_5	GO:0015985~energy coupled proton transport, down electrochemical gradient	8	0.00137091	ENSMUSG00000019087, ENSMUSG00000019302, ENSMUSG00000052459, ENSMUSG00000025393, ENSMUSG00000025781, ENSMUSG00000018770, ENSMUSG00000006057, ENSMUSG00000000563	4.64694	2.20204	0.0220204
GOTERM_BP_5	GO:0010959~regulation of metal ion transport	9	0.00150271	ENSMUSG00000030302, ENSMUSG00000042429, ENSMUSG00000032216, ENSMUSG00000007617, ENSMUSG00000032966, ENSMUSG00000040118, ENSMUSG00000019699, ENSMUSG00000032562, ENSMUSG00000032011	4.02977	2.41133	0.0241133
GOTERM_BP_5	GO:0030003~cellular cation homeostasis	17	0.00186287	ENSMUSG00000052456, ENSMUSG00000040907, ENSMUSG00000032966, ENSMUSG00000021109, ENSMUSG00000034656, ENSMUSG00000030102, ENSMUSG00000038486, ENSMUSG00000002985, ENSMUSG00000030302, ENSMUSG00000037996, ENSMUSG00000031618, ENSMUSG00000026959, ENSMUSG00000022982, ENSMUSG00000039953, ENSMUSG00000029064, ENSMUSG00000030898, ENSMUSG00000007097	2.40372	2.98111	0.0298111
GOTERM_BP_5	GO:0007264~small GTPase mediated signal transduction	24	0.00209826	ENSMUSG00000041992, ENSMUSG00000021910, ENSMUSG00000021062, ENSMUSG00000022159, ENSMUSG00000024870, ENSMUSG00000026878, ENSMUSG00000059923, ENSMUSG00000079477, ENSMUSG00000029405, ENSMUSG00000029512, ENSMUSG00000062232, ENSMUSG00000057455, ENSMUSG00000030134, ENSMUSG00000048076, ENSMUSG00000032549, ENSMUSG00000026585, ENSMUSG00000032356, ENSMUSG00000051853, ENSMUSG00000043670, ENSMUSG00000049866,…	1.99927	3.35181	0.0335181
GOTERM_BP_5	GO:0006006~glucose metabolic process	16	0.00214499	ENSMUSG00000032294, ENSMUSG00000021910, ENSMUSG00000027665, ENSMUSG00000021756, ENSMUSG00000034656, ENSMUSG00000004267, ENSMUSG00000071072, ENSMUSG00000014956, ENSMUSG00000063524, ENSMUSG00000036427, ENSMUSG00000020456, ENSMUSG00000023019, ENSMUSG00000019179, ENSMUSG00000026827, ENSMUSG00000037622, ENSMUSG00000057666	2.45624	3.42524	0.0342524
GOTERM_BP_5	GO:0034220~ion transmembrane transport	8	0.00293984	ENSMUSG00000019087, ENSMUSG00000019302, ENSMUSG00000052459, ENSMUSG00000025393, ENSMUSG00000025781, ENSMUSG00000018770, ENSMUSG00000006057, ENSMUSG00000000563	4.09374	4.66631	0.0466631
GOTERM_BP_5	GO:0015672~monovalent inorganic cation transport	26	0.0038653	ENSMUSG00000019302, ENSMUSG00000052459, ENSMUSG00000040907, ENSMUSG00000030685, ENSMUSG00000005936, ENSMUSG00000070570, ENSMUSG00000026904, ENSMUSG00000019194, ENSMUSG00000023017, ENSMUSG00000025781, ENSMUSG00000018770, ENSMUSG00000027340, ENSMUSG00000000563, ENSMUSG00000006057, ENSMUSG00000064329, ENSMUSG00000026576, ENSMUSG00000017740, ENSMUSG00000019087, ENSMUSG00000023033, ENSMUSG00000027895,…	1.84421	6.09244	0.0609244
GOTERM_BP_5	GO:0006164~purine nucleotide biosynthetic process	15	0.00457197	ENSMUSG00000019302, ENSMUSG00000052459, ENSMUSG00000040907, ENSMUSG00000037685, ENSMUSG00000025781, ENSMUSG00000018770, ENSMUSG00000027823, ENSMUSG00000006057, ENSMUSG00000000563, ENSMUSG00000026576, ENSMUSG00000030302, ENSMUSG00000019087, ENSMUSG00000026463, ENSMUSG00000025393, ENSMUSG00000007097	2.35315	7.16791	0.0716791
GOTERM_BP_5	GO:0060627~regulation of vesicle-mediated transport	11	0.00496135	ENSMUSG00000020894, ENSMUSG00000024381, ENSMUSG00000040276, ENSMUSG00000024294, ENSMUSG00000037902, ENSMUSG00000017978, ENSMUSG00000055447, ENSMUSG00000034656, ENSMUSG00000030605, ENSMUSG00000003814, ENSMUSG00000049044	2.84835	7.75556	0.0775556
GOTERM_BP_5	GO:0007416~synaptogenesis	5	0.0053614	ENSMUSG00000032076, ENSMUSG00000033577, ENSMUSG00000034656, ENSMUSG00000020886, ENSMUSG00000066392	6.71629	8.35567	0.0835567
GOTERM_CC_5	GO:0005737~cytoplasm	432	6.26831e-24	ENSMUSG00000062647, ENSMUSG00000024268, ENSMUSG00000046785, ENSMUSG00000025203, ENSMUSG00000018196, ENSMUSG00000021109, ENSMUSG00000018707, ENSMUSG00000038696, ENSMUSG00000019370, ENSMUSG00000032503, ENSMUSG00000033066, ENSMUSG00000006057, ENSMUSG00000009394, ENSMUSG00000022263, ENSMUSG00000006651, ENSMUSG00000025781, ENSMUSG00000051853, ENSMUSG00000039953, ENSMUSG00000061904, ENSMUSG00000020708,…	1.41411	8.48637e-21	8.48637e-23
GOTERM_CC_5	GO:0030425~dendrite	29	1.17806e-13	ENSMUSG00000038084, ENSMUSG00000015222, ENSMUSG00000001986, ENSMUSG00000022048, ENSMUSG00000031012, ENSMUSG00000028059, ENSMUSG00000017740, ENSMUSG00000042429, ENSMUSG00000004113, ENSMUSG00000033615, ENSMUSG00000036766, ENSMUSG00000005089, ENSMUSG00000022421, ENSMUSG00000026782, ENSMUSG00000034656, ENSMUSG00000023017, ENSMUSG00000033981, ENSMUSG00000027184, ENSMUSG00000078816, ENSMUSG00000042453,…	5.5818	1.59472e-10	1.59472e-12
GOTERM_CC_5	GO:0031410~cytoplasmic vesicle	61	4.06604e-11	ENSMUSG00000032936, ENSMUSG00000040276, ENSMUSG00000070570, ENSMUSG00000017978, ENSMUSG00000079477, ENSMUSG00000041720, ENSMUSG00000049775, ENSMUSG00000029512, ENSMUSG00000038696, ENSMUSG00000056429, ENSMUSG00000032549, ENSMUSG00000032181, ENSMUSG00000071650, ENSMUSG00000022841, ENSMUSG00000026159, ENSMUSG00000009394, ENSMUSG00000032482, ENSMUSG00000021314, ENSMUSG00000022463, ENSMUSG00000030058,…	2.54235	5.50481e-08	5.50481e-10
GOTERM_CC_5	GO:0005624~membrane fraction	61	4.76829e-11	ENSMUSG00000062647, ENSMUSG00000001986, ENSMUSG00000007617, ENSMUSG00000070570, ENSMUSG00000031012, ENSMUSG00000020886, ENSMUSG00000029512, ENSMUSG00000007440, ENSMUSG00000024639, ENSMUSG00000032216, ENSMUSG00000026470, ENSMUSG00000037996, ENSMUSG00000031748, ENSMUSG00000026223, ENSMUSG00000015291, ENSMUSG00000032589, ENSMUSG00000031391, ENSMUSG00000040249, ENSMUSG00000030806, ENSMUSG00000006651,…	2.53238	6.45555e-08	6.45555e-10
GOTERM_CC_5	GO:0044444~cytoplasmic part	273	1.92613e-10	ENSMUSG00000062647, ENSMUSG00000046785, ENSMUSG00000032399, ENSMUSG00000025203, ENSMUSG00000043940, ENSMUSG00000018196, ENSMUSG00000023764, ENSMUSG00000038696, ENSMUSG00000006057, ENSMUSG00000027255, ENSMUSG00000009394, ENSMUSG00000006651, ENSMUSG00000020402, ENSMUSG00000025781, ENSMUSG00000043857, ENSMUSG00000027244, ENSMUSG00000034171, ENSMUSG00000003363, ENSMUSG00000051853, ENSMUSG00000061904,…	1.38147	2.60769e-07	2.60769e-09
GOTERM_CC_5	GO:0016023~cytoplasmic membrane-bounded vesicle	48	2.06151e-08	ENSMUSG00000002957, ENSMUSG00000034593, ENSMUSG00000019302, ENSMUSG00000040276, ENSMUSG00000070570, ENSMUSG00000017978, ENSMUSG00000079477, ENSMUSG00000038486, ENSMUSG00000018326, ENSMUSG00000041720, ENSMUSG00000049775, ENSMUSG00000029512, ENSMUSG00000038696, ENSMUSG00000000826, ENSMUSG00000056429, ENSMUSG00000032181, ENSMUSG00000071650, ENSMUSG00000024487, ENSMUSG00000022841, ENSMUSG00000026159,…	2.45477	2.79099e-05	2.79099e-07
GOTERM_CC_5	GO:0005829~cytosol	57	4.00423e-08	ENSMUSG00000000441, ENSMUSG00000047215, ENSMUSG00000024862, ENSMUSG00000020176, ENSMUSG00000031012, ENSMUSG00000049775, ENSMUSG00000004267, ENSMUSG00000027823, ENSMUSG00000032216, ENSMUSG00000037373, ENSMUSG00000022601, ENSMUSG00000037622, ENSMUSG00000022607, ENSMUSG00000025290, ENSMUSG00000049044, ENSMUSG00000052459, ENSMUSG00000026782, ENSMUSG00000028161, ENSMUSG00000063358, ENSMUSG00000026878,…	2.19822	5.42114e-05	5.42114e-07
GOTERM_CC_5	GO:0044459~plasma membrane part	123	1.11734e-07	ENSMUSG00000019428, ENSMUSG00000001986, ENSMUSG00000005338, ENSMUSG00000041670, ENSMUSG00000043940, ENSMUSG00000025892, ENSMUSG00000020886, ENSMUSG00000054728, ENSMUSG00000028059, ENSMUSG00000024462, ENSMUSG00000024639, ENSMUSG00000031584, ENSMUSG00000027255, ENSMUSG00000067578, ENSMUSG00000021823, ENSMUSG00000022841, ENSMUSG00000003273, ENSMUSG00000009394, ENSMUSG00000021314, ENSMUSG00000032773,…	1.59473	0.000151271	1.51271e-06
GOTERM_CC_5	GO:0019717~synaptosome	16	3.09559e-07	ENSMUSG00000053825, ENSMUSG00000026276, ENSMUSG00000070570, ENSMUSG00000031012, ENSMUSG00000023017, ENSMUSG00000020886, ENSMUSG00000078816, ENSMUSG00000030209, ENSMUSG00000020894, ENSMUSG00000040640, ENSMUSG00000020516, ENSMUSG00000040003, ENSMUSG00000026959, ENSMUSG00000027273, ENSMUSG00000030337, ENSMUSG00000032589	5.13269	0.000419096	4.19096e-06
GOTERM_CC_5	GO:0030054~cell junction	49	3.76054e-07	ENSMUSG00000034799, ENSMUSG00000001986, ENSMUSG00000005338, ENSMUSG00000041670, ENSMUSG00000007617, ENSMUSG00000070570, ENSMUSG00000010803, ENSMUSG00000017978, ENSMUSG00000038486, ENSMUSG00000025892, ENSMUSG00000020886, ENSMUSG00000054728, ENSMUSG00000028059, ENSMUSG00000024462, ENSMUSG00000024617, ENSMUSG00000064329, ENSMUSG00000067578, ENSMUSG00000021823, ENSMUSG00000036591, ENSMUSG00000020516,…	2.20733	0.000509121	5.09121e-06
GOTERM_CC_5	GO:0030424~axon	20	5.34996e-07	ENSMUSG00000022636, ENSMUSG00000025969, ENSMUSG00000020598, ENSMUSG00000033577, ENSMUSG00000039542, ENSMUSG00000022048, ENSMUSG00000069601, ENSMUSG00000070880, ENSMUSG00000064329, ENSMUSG00000032076, ENSMUSG00000042429, ENSMUSG00000004113, ENSMUSG00000026442, ENSMUSG00000063063, ENSMUSG00000033004, ENSMUSG00000027130, ENSMUSG00000053024, ENSMUSG00000031391, ENSMUSG00000024163, ENSMUSG00000005089	3.95745	0.000724303	7.24303e-06
GOTERM_CC_5	GO:0043229~intracellular organelle	447	7.81477e-07	ENSMUSG00000062647, ENSMUSG00000024268, ENSMUSG00000046785, ENSMUSG00000025203, ENSMUSG00000018196, ENSMUSG00000021109, ENSMUSG00000018707, ENSMUSG00000038696, ENSMUSG00000019370, ENSMUSG00000033066, ENSMUSG00000006057, ENSMUSG00000020262, ENSMUSG00000009394, ENSMUSG00000006651, ENSMUSG00000013089, ENSMUSG00000025781, ENSMUSG00000051853, ENSMUSG00000039953, ENSMUSG00000061904, ENSMUSG00000020708,…	1.15613	0.001058	1.058e-05
GOTERM_CC_5	GO:0005856~cytoskeleton	88	2.2897e-06	ENSMUSG00000059248, ENSMUSG00000022451, ENSMUSG00000027012, ENSMUSG00000001986, ENSMUSG00000007617, ENSMUSG00000028530, ENSMUSG00000024862, ENSMUSG00000049775, ENSMUSG00000020886, ENSMUSG00000018707, ENSMUSG00000023764, ENSMUSG00000019370, ENSMUSG00000074657, ENSMUSG00000028059, ENSMUSG00000033066, ENSMUSG00000067889, ENSMUSG00000028649, ENSMUSG00000034868, ENSMUSG00000017670, ENSMUSG00000025555,…	1.66058	0.00309987	3.09987e-05
GOTERM_CC_5	GO:0030135~coated vesicle	20	5.31136e-06	ENSMUSG00000040276, ENSMUSG00000030058, ENSMUSG00000070570, ENSMUSG00000017978, ENSMUSG00000033981, ENSMUSG00000038486, ENSMUSG00000026878, ENSMUSG00000030209, ENSMUSG00000032076, ENSMUSG00000056429, ENSMUSG00000020894, ENSMUSG00000024487, ENSMUSG00000047126, ENSMUSG00000009394, ENSMUSG00000026959, ENSMUSG00000031731, ENSMUSG00000035864, ENSMUSG00000021314, ENSMUSG00000026553, ENSMUSG00000068923	3.4149	0.00719055	7.19055e-05
GOTERM_CC_5	GO:0009898~internal side of plasma membrane	33	5.59439e-06	ENSMUSG00000019428, ENSMUSG00000002957, ENSMUSG00000024870, ENSMUSG00000043940, ENSMUSG00000017978, ENSMUSG00000063801, ENSMUSG00000020886, ENSMUSG00000033916, ENSMUSG00000027255, ENSMUSG00000021823, ENSMUSG00000022841, ENSMUSG00000043670, ENSMUSG00000021314, ENSMUSG00000063063, ENSMUSG00000022607, ENSMUSG00000026553, ENSMUSG00000027002, ENSMUSG00000022421, ENSMUSG00000035152, ENSMUSG00000032382,…	2.43445	0.00757371	7.57371e-05
GOTERM_CC_5	GO:0019898~extrinsic to membrane	45	1.24072e-05	ENSMUSG00000024969, ENSMUSG00000034799, ENSMUSG00000017288, ENSMUSG00000025658, ENSMUSG00000032936, ENSMUSG00000061981, ENSMUSG00000041670, ENSMUSG00000043940, ENSMUSG00000028530, ENSMUSG00000019790, ENSMUSG00000031012, ENSMUSG00000020886, ENSMUSG00000002985, ENSMUSG00000024524, ENSMUSG00000038696, ENSMUSG00000026883, ENSMUSG00000024639, ENSMUSG00000027438, ENSMUSG00000025555, ENSMUSG00000044340,…	2.01855	0.0167962	0.000167962
GOTERM_CC_5	GO:0043232~intracellular non-membrane-bounded organelle	130	1.33796e-05	ENSMUSG00000062647, ENSMUSG00000059248, ENSMUSG00000032399, ENSMUSG00000022451, ENSMUSG00000001986, ENSMUSG00000000740, ENSMUSG00000060743, ENSMUSG00000049775, ENSMUSG00000018707, ENSMUSG00000020886, ENSMUSG00000023764, ENSMUSG00000019370, ENSMUSG00000028059, ENSMUSG00000033066, ENSMUSG00000028649, ENSMUSG00000021823, ENSMUSG00000036438, ENSMUSG00000028849, ENSMUSG00000021314, ENSMUSG00000032589,…	1.43429	0.0181124	0.000181124
GOTERM_CC_5	GO:0044446~intracellular organelle part	197	1.79893e-05	ENSMUSG00000043940, ENSMUSG00000021109, ENSMUSG00000018707, ENSMUSG00000023764, ENSMUSG00000019370, ENSMUSG00000033066, ENSMUSG00000006057, ENSMUSG00000036438, ENSMUSG00000009394, ENSMUSG00000000948, ENSMUSG00000020402, ENSMUSG00000025781, ENSMUSG00000009575, ENSMUSG00000061904, ENSMUSG00000039953, ENSMUSG00000020708, ENSMUSG00000025393, ENSMUSG00000022391, ENSMUSG00000056201, ENSMUSG00000036940,…	1.30587	0.0243521	0.000243521
GOTERM_CC_5	GO:0043198~dendritic shaft	7	2.334e-05	ENSMUSG00000004113, ENSMUSG00000015222, ENSMUSG00000001986, ENSMUSG00000023017, ENSMUSG00000033981, ENSMUSG00000028059, ENSMUSG00000005089	10.5862	0.0315942	0.000315942
GOTERM_CC_5	GO:0012506~vesicle membrane	15	0.000174552	ENSMUSG00000033577, ENSMUSG00000030058, ENSMUSG00000029390, ENSMUSG00000070570, ENSMUSG00000059923, ENSMUSG00000033981, ENSMUSG00000041720, ENSMUSG00000029512, ENSMUSG00000020894, ENSMUSG00000047126, ENSMUSG00000009394, ENSMUSG00000035864, ENSMUSG00000032482, ENSMUSG00000063077, ENSMUSG00000026553	3.27408	0.236059	0.00236059
GOTERM_CC_5	GO:0005874~microtubule	26	0.000175187	ENSMUSG00000026276, ENSMUSG00000015222, ENSMUSG00000072825, ENSMUSG00000027012, ENSMUSG00000057335, ENSMUSG00000024862, ENSMUSG00000037415, ENSMUSG00000023004, ENSMUSG00000018707, ENSMUSG00000074657, ENSMUSG00000028059, ENSMUSG00000072235, ENSMUSG00000028851, ENSMUSG00000031865, ENSMUSG00000015149, ENSMUSG00000006740, ENSMUSG00000041236, ENSMUSG00000029651, ENSMUSG00000026764, ENSMUSG00000047459,…	2.29367	0.236917	0.00236917
GOTERM_CC_5	GO:0005875~microtubule associated complex	13	0.000212553	ENSMUSG00000026585, ENSMUSG00000006740, ENSMUSG00000015222, ENSMUSG00000027012, ENSMUSG00000047459, ENSMUSG00000026764, ENSMUSG00000009013, ENSMUSG00000024862, ENSMUSG00000031865, ENSMUSG00000018707, ENSMUSG00000063077, ENSMUSG00000074657, ENSMUSG00000013698	3.62159	0.287382	0.00287382
GOTERM_CC_5	GO:0015630~microtubule cytoskeleton	39	0.000382216	ENSMUSG00000026276, ENSMUSG00000015222, ENSMUSG00000027012, ENSMUSG00000072825, ENSMUSG00000057335, ENSMUSG00000024862, ENSMUSG00000037415, ENSMUSG00000023004, ENSMUSG00000018707, ENSMUSG00000023764, ENSMUSG00000019370, ENSMUSG00000074657, ENSMUSG00000028059, ENSMUSG00000028649, ENSMUSG00000036438, ENSMUSG00000028849, ENSMUSG00000033004, ENSMUSG00000011831, ENSMUSG00000072235, ENSMUSG00000028851,…	1.83494	0.516225	0.00516225
GOTERM_CC_5	GO:0005794~Golgi apparatus	53	0.000419891	ENSMUSG00000040276, ENSMUSG00000017288, ENSMUSG00000079477, ENSMUSG00000041720, ENSMUSG00000028059, ENSMUSG00000004364, ENSMUSG00000032549, ENSMUSG00000056429, ENSMUSG00000071650, ENSMUSG00000027255, ENSMUSG00000026470, ENSMUSG00000001576, ENSMUSG00000032482, ENSMUSG00000022463, ENSMUSG00000030058, ENSMUSG00000022159, ENSMUSG00000006651, ENSMUSG00000026878, ENSMUSG00000043857, ENSMUSG00000048076,…	1.64536	0.566977	0.00566977
GOTERM_CC_5	GO:0044433~cytoplasmic vesicle part	14	0.000500736	ENSMUSG00000030058, ENSMUSG00000029390, ENSMUSG00000070570, ENSMUSG00000033981, ENSMUSG00000041720, ENSMUSG00000049775, ENSMUSG00000029512, ENSMUSG00000020894, ENSMUSG00000047126, ENSMUSG00000009394, ENSMUSG00000035864, ENSMUSG00000032482, ENSMUSG00000063077, ENSMUSG00000026553	3.12014	0.675798	0.00675798
GOTERM_CC_5	GO:0044430~cytoskeletal part	58	0.000518456	ENSMUSG00000059248, ENSMUSG00000027012, ENSMUSG00000001986, ENSMUSG00000007617, ENSMUSG00000024862, ENSMUSG00000018707, ENSMUSG00000020886, ENSMUSG00000023764, ENSMUSG00000019370, ENSMUSG00000074657, ENSMUSG00000028059, ENSMUSG00000067889, ENSMUSG00000033066, ENSMUSG00000034868, ENSMUSG00000036438, ENSMUSG00000028849, ENSMUSG00000031865, ENSMUSG00000025586, ENSMUSG00000026585, ENSMUSG00000015149,…	1.58656	0.699635	0.00699635
GOTERM_CC_5	GO:0014069~postsynaptic density	10	0.000561418	ENSMUSG00000042429, ENSMUSG00000001986, ENSMUSG00000007617, ENSMUSG00000052572, ENSMUSG00000026959, ENSMUSG00000030102, ENSMUSG00000033981, ENSMUSG00000020886, ENSMUSG00000025586, ENSMUSG00000030209	4.15144	0.757407	0.00757407
GOTERM_CC_5	GO:0048770~pigment granule	13	0.000612504	ENSMUSG00000071650, ENSMUSG00000034593, ENSMUSG00000019302, ENSMUSG00000047126, ENSMUSG00000079477, ENSMUSG00000020048, ENSMUSG00000058799, ENSMUSG00000018326, ENSMUSG00000020142, ENSMUSG00000027248, ENSMUSG00000059714, ENSMUSG00000000826, ENSMUSG00000010095	3.23813	0.826063	0.00826063
GOTERM_CC_5	GO:0030659~cytoplasmic vesicle membrane	13	0.000757896	ENSMUSG00000020894, ENSMUSG00000030058, ENSMUSG00000047126, ENSMUSG00000029390, ENSMUSG00000009394, ENSMUSG00000070570, ENSMUSG00000035864, ENSMUSG00000032482, ENSMUSG00000033981, ENSMUSG00000041720, ENSMUSG00000063077, ENSMUSG00000029512, ENSMUSG00000026553	3.16369	1.02122	0.0102122
GOTERM_CC_5	GO:0005798~Golgi-associated vesicle	8	0.00126849	ENSMUSG00000056429, ENSMUSG00000040276, ENSMUSG00000030058, ENSMUSG00000047126, ENSMUSG00000032482, ENSMUSG00000026878, ENSMUSG00000041720, ENSMUSG00000026553	4.70497	1.70376	0.0170376
GOTERM_CC_5	GO:0005871~kinesin complex	5	0.00179123	ENSMUSG00000026585, ENSMUSG00000006740, ENSMUSG00000026764, ENSMUSG00000024862, ENSMUSG00000074657	8.82182	2.39801	0.0239801
GOTERM_CC_5	GO:0016469~proton-transporting two-sector ATPase complex	8	0.00320982	ENSMUSG00000019087, ENSMUSG00000019302, ENSMUSG00000052459, ENSMUSG00000025393, ENSMUSG00000025781, ENSMUSG00000018770, ENSMUSG00000006057, ENSMUSG00000000563	4.03283	4.25924	0.0425924
GOTERM_CC_5	GO:0008328~ionotropic glutamate receptor complex	5	0.00335918	ENSMUSG00000026959, ENSMUSG00000033981, ENSMUSG00000025892, ENSMUSG00000020886, ENSMUSG00000030209	7.56156	4.45328	0.0445328
GOTERM_CC_5	GO:0005905~coated pit	7	0.00340947	ENSMUSG00000040249, ENSMUSG00000033577, ENSMUSG00000002957, ENSMUSG00000035152, ENSMUSG00000047126, ENSMUSG00000022841, ENSMUSG00000035203	4.63145	4.51853	0.0451853
GOTERM_CC_5	GO:0000790~nuclear chromatin	9	0.00401638	ENSMUSG00000005566, ENSMUSG00000026484, ENSMUSG00000062270, ENSMUSG00000038331, ENSMUSG00000023055, ENSMUSG00000023927, ENSMUSG00000060743, ENSMUSG00000068039, ENSMUSG00000016559, ENSMUSG00000009575	3.46457	5.30276	0.0530276
GOTERM_CC_5	GO:0031201~SNARE complex	4	0.00489343	ENSMUSG00000020894, ENSMUSG00000033615, ENSMUSG00000027273, ENSMUSG00000002741	10.5862	6.42552	0.0642552
GOTERM_CC_5	GO:0044431~Golgi apparatus part	21	0.00542392	ENSMUSG00000008153, ENSMUSG00000040276, ENSMUSG00000022159, ENSMUSG00000030058, ENSMUSG00000026878, ENSMUSG00000041720, ENSMUSG00000063801, ENSMUSG00000056429, ENSMUSG00000020894, ENSMUSG00000047126, ENSMUSG00000027799, ENSMUSG00000026470, ENSMUSG00000031731, ENSMUSG00000045503, ENSMUSG00000039953, ENSMUSG00000032482, ENSMUSG00000028126, ENSMUSG00000027273, ENSMUSG00000026553, ENSMUSG00000024163,…	1.95868	7.09863	0.0709863
GOTERM_CC_5	GO:0033267~axon part	6	0.00556218	ENSMUSG00000004113, ENSMUSG00000042429, ENSMUSG00000031391, ENSMUSG00000064329, ENSMUSG00000005089, ENSMUSG00000024163	5.08137	7.27331	0.0727331
GOTERM_CC_5	GO:0030117~membrane coat	9	0.00558904	ENSMUSG00000002957, ENSMUSG00000035152, ENSMUSG00000030058, ENSMUSG00000047126, ENSMUSG00000022841, ENSMUSG00000022973, ENSMUSG00000031731, ENSMUSG00000063801, ENSMUSG00000026553	3.28537	7.30722	0.0730722
GOTERM_CC_5	GO:0005802~trans-Golgi network	8	0.00610833	ENSMUSG00000056429, ENSMUSG00000020894, ENSMUSG00000040276, ENSMUSG00000027799, ENSMUSG00000026470, ENSMUSG00000031731, ENSMUSG00000063801, ENSMUSG00000027273	3.60381	7.9604	0.079604
GOTERM_MF_5	GO:0016462~pyrophosphatase activity	54	3.85529e-06	ENSMUSG00000038084, ENSMUSG00000027012, ENSMUSG00000024862, ENSMUSG00000018707, ENSMUSG00000024524, ENSMUSG00000074657, ENSMUSG00000024921, ENSMUSG00000024639, ENSMUSG00000034868, ENSMUSG00000026576, ENSMUSG00000000787, ENSMUSG00000031748, ENSMUSG00000029064, ENSMUSG00000034187, ENSMUSG00000052456, ENSMUSG00000052459, ENSMUSG00000063870, ENSMUSG00000031865, ENSMUSG00000025781, ENSMUSG00000062203,…	1.93381	0.00473082	4.73082e-05
GOTERM_MF_5	GO:0005088~Ras guanyl-nucleotide exchange factor activity	15	1.20241e-05	ENSMUSG00000026585, ENSMUSG00000041992, ENSMUSG00000025558, ENSMUSG00000025555, ENSMUSG00000032356, ENSMUSG00000061751, ENSMUSG00000037415, ENSMUSG00000048960, ENSMUSG00000059495, ENSMUSG00000022263, ENSMUSG00000025656, ENSMUSG00000062232, ENSMUSG00000041977, ENSMUSG00000028059, ENSMUSG00000040687	4.14204	0.014754	0.00014754
GOTERM_MF_5	GO:0032559~adenyl ribonucleotide binding	97	1.33143e-05	ENSMUSG00000000441, ENSMUSG00000032294, ENSMUSG00000024969, ENSMUSG00000020032, ENSMUSG00000032936, ENSMUSG00000028530, ENSMUSG00000018209, ENSMUSG00000029471, ENSMUSG00000031012, ENSMUSG00000018707, ENSMUSG00000029512, ENSMUSG00000074657, ENSMUSG00000032604, ENSMUSG00000027823, ENSMUSG00000024921, ENSMUSG00000000787, ENSMUSG00000009394, ENSMUSG00000026223, ENSMUSG00000052155, ENSMUSG00000017291,…	1.52272	0.0163371	0.000163371
GOTERM_MF_5	GO:0017075~syntaxin-1 binding	5	0.00021571	ENSMUSG00000020894, ENSMUSG00000033615, ENSMUSG00000019790, ENSMUSG00000027273, ENSMUSG00000025867	14.3246	0.264382	0.00264382
GOTERM_MF_5	GO:0008324~cation transmembrane transporter activity	38	0.00064838	ENSMUSG00000019302, ENSMUSG00000030685, ENSMUSG00000040907, ENSMUSG00000070570, ENSMUSG00000040118, ENSMUSG00000019194, ENSMUSG00000018770, ENSMUSG00000027340, ENSMUSG00000000563, ENSMUSG00000064329, ENSMUSG00000006057, ENSMUSG00000017740, ENSMUSG00000004113, ENSMUSG00000019087, ENSMUSG00000037996, ENSMUSG00000056258, ENSMUSG00000020142, ENSMUSG00000004110, ENSMUSG00000027130, ENSMUSG00000005089,…	1.78836	0.792742	0.00792742
GOTERM_MF_5	GO:0042625~ATPase activity, coupled to transmembrane movement of ions	11	0.000748352	ENSMUSG00000026576, ENSMUSG00000030302, ENSMUSG00000019087, ENSMUSG00000052456, ENSMUSG00000052459, ENSMUSG00000040907, ENSMUSG00000037685, ENSMUSG00000026463, ENSMUSG00000025393, ENSMUSG00000025781, ENSMUSG00000007097	3.6538	0.914458	0.00914458
GOTERM_MF_5	GO:0019787~small conjugating protein ligase activity	15	0.00105167	ENSMUSG00000005371, ENSMUSG00000024294, ENSMUSG00000025261, ENSMUSG00000044308, ENSMUSG00000035247, ENSMUSG00000024073, ENSMUSG00000060450, ENSMUSG00000056537, ENSMUSG00000066036, ENSMUSG00000051234, ENSMUSG00000026484, ENSMUSG00000032216, ENSMUSG00000029203, ENSMUSG00000029686, ENSMUSG00000039159	2.75031	1.28291	0.0128291
GOTERM_MF_5	GO:0042626~ATPase activity, coupled to transmembrane movement of substances	12	0.00319535	ENSMUSG00000026576, ENSMUSG00000030302, ENSMUSG00000019087, ENSMUSG00000052456, ENSMUSG00000052459, ENSMUSG00000040907, ENSMUSG00000037685, ENSMUSG00000026463, ENSMUSG00000025393, ENSMUSG00000028127, ENSMUSG00000025781, ENSMUSG00000007097	2.83538	3.85124	0.0385124
GOTERM_MF_5	GO:0019901~protein kinase binding	10	0.00350629	ENSMUSG00000060261, ENSMUSG00000025658, ENSMUSG00000027799, ENSMUSG00000028944, ENSMUSG00000032604, ENSMUSG00000020859, ENSMUSG00000020372, ENSMUSG00000013698, ENSMUSG00000022619, ENSMUSG00000024163	3.22807	4.21865	0.0421865
GOTERM_MF_5	GO:0032561~guanyl ribonucleotide binding	28	0.00453351	ENSMUSG00000026276, ENSMUSG00000059248, ENSMUSG00000038084, ENSMUSG00000024870, ENSMUSG00000023004, ENSMUSG00000079477, ENSMUSG00000032562, ENSMUSG00000024524, ENSMUSG00000057455, ENSMUSG00000050379, ENSMUSG00000024639, ENSMUSG00000032549, ENSMUSG00000025558, ENSMUSG00000043670, ENSMUSG00000031748, ENSMUSG00000020457, ENSMUSG00000021062, ENSMUSG00000022159, ENSMUSG00000021794, ENSMUSG00000027523,…	1.76788	5.42323	0.0542323
GOTERM_MF_5	GO:0004672~protein kinase activity	40	0.00472522	ENSMUSG00000000441, ENSMUSG00000024242, ENSMUSG00000024969, ENSMUSG00000020032, ENSMUSG00000022451, ENSMUSG00000032936, ENSMUSG00000028530, ENSMUSG00000018209, ENSMUSG00000031012, ENSMUSG00000029471, ENSMUSG00000029512, ENSMUSG00000024617, ENSMUSG00000005566, ENSMUSG00000020516, ENSMUSG00000035390, ENSMUSG00000052155, ENSMUSG00000017291, ENSMUSG00000022263, ENSMUSG00000028944, ENSMUSG00000022607,…	1.57251	5.6465	0.056465
GOTERM_MF_5	GO:0022836~gated channel activity	23	0.00551641	ENSMUSG00000001986, ENSMUSG00000030685, ENSMUSG00000005936, ENSMUSG00000010803, ENSMUSG00000040118, ENSMUSG00000034656, ENSMUSG00000019194, ENSMUSG00000023017, ENSMUSG00000030102, ENSMUSG00000033981, ENSMUSG00000025892, ENSMUSG00000020402, ENSMUSG00000030209, ENSMUSG00000064329, ENSMUSG00000004113, ENSMUSG00000023033, ENSMUSG00000027895, ENSMUSG00000026959, ENSMUSG00000056258, ENSMUSG00000028931,…	1.87596	6.5628	0.065628
GOTERM_MF_5	GO:0008066~glutamate receptor activity	7	0.00555553	ENSMUSG00000019505, ENSMUSG00000001986, ENSMUSG00000026959, ENSMUSG00000033981, ENSMUSG00000025892, ENSMUSG00000024462, ENSMUSG00000030209	4.22197	6.60789	0.0660789
GOTERM_MF_5	GO:0015405~P-P-bond-hydrolysis-driven transmembrane transporter activity	12	0.00675917	ENSMUSG00000026576, ENSMUSG00000030302, ENSMUSG00000019087, ENSMUSG00000052456, ENSMUSG00000052459, ENSMUSG00000040907, ENSMUSG00000037685, ENSMUSG00000026463, ENSMUSG00000025393, ENSMUSG00000028127, ENSMUSG00000025781, ENSMUSG00000007097	2.57039	7.98559	0.0798559
GOTERM_MF_5	GO:0016791~phosphatase activity	20	0.00779205	ENSMUSG00000034613, ENSMUSG00000013236, ENSMUSG00000030854, ENSMUSG00000025314, ENSMUSG00000025041, ENSMUSG00000046062, ENSMUSG00000028161, ENSMUSG00000028528, ENSMUSG00000026113, ENSMUSG00000028517, ENSMUSG00000068748, ENSMUSG00000014956, ENSMUSG00000044340, ENSMUSG00000027784, ENSMUSG00000022973, ENSMUSG00000056553, ENSMUSG00000020349, ENSMUSG00000028399, ENSMUSG00000038028, ENSMUSG00000013663	1.92599	9.15293	0.0915293

## Sheet: GF-exGF
Category	Term	Count	PValue	Genes	Fold Enrichment	FDR [%]	FDR faction
KEGG_PATHWAY	mmu04720:Long-term potentiation	10	5.43215e-05	ENSMUSG00000014956, ENSMUSG00000020524, ENSMUSG00000036438, ENSMUSG00000028161, ENSMUSG00000052889, ENSMUSG00000063358, ENSMUSG00000014077, ENSMUSG00000033981, ENSMUSG00000019370, ENSMUSG00000024617, ENSMUSG00000024639	5.6532	0.0618592	0.000618592
KEGG_PATHWAY	mmu04730:Long-term depression	10	6.81262e-05	ENSMUSG00000007564, ENSMUSG00000020524, ENSMUSG00000029334, ENSMUSG00000031748, ENSMUSG00000052889, ENSMUSG00000034656, ENSMUSG00000063358, ENSMUSG00000033981, ENSMUSG00000034781, ENSMUSG00000024639	5.49617	0.0775738	0.000775738
KEGG_PATHWAY	mmu05010:Alzheimer's disease	13	0.00193466	ENSMUSG00000037916, ENSMUSG00000037032, ENSMUSG00000028161, ENSMUSG00000063358, ENSMUSG00000020153, ENSMUSG00000025781, ENSMUSG00000019370, ENSMUSG00000024639, ENSMUSG00000018411, ENSMUSG00000021520, ENSMUSG00000025428, ENSMUSG00000036438, ENSMUSG00000025393, ENSMUSG00000014077	2.8266	2.18172	0.0218172
KEGG_PATHWAY	mmu04114:Oocyte meiosis	10	0.00225706	ENSMUSG00000007564, ENSMUSG00000014956, ENSMUSG00000036438, ENSMUSG00000025217, ENSMUSG00000028161, ENSMUSG00000036309, ENSMUSG00000063358, ENSMUSG00000014077, ENSMUSG00000018326, ENSMUSG00000019370, ENSMUSG00000024617	3.44108	2.54103	0.0254103
KEGG_PATHWAY	mmu03040:Spliceosome	10	0.00376448	ENSMUSG00000020719, ENSMUSG00000020180, ENSMUSG00000028821, ENSMUSG00000003360, ENSMUSG00000039630, ENSMUSG00000031157, ENSMUSG00000060373, ENSMUSG00000020850, ENSMUSG00000046434, ENSMUSG00000021039	3.19132	4.20517	0.0420517
KEGG_PATHWAY	mmu00190:Oxidative phosphorylation	10	0.00514552	ENSMUSG00000021520, ENSMUSG00000037916, ENSMUSG00000019087, ENSMUSG00000052459, ENSMUSG00000025428, ENSMUSG00000019210, ENSMUSG00000025393, ENSMUSG00000020153, ENSMUSG00000025781, ENSMUSG00000065947, ENSMUSG00000064363	3.04403	5.70697	0.0570697
KEGG_PATHWAY	mmu05012:Parkinson's disease	10	0.00596941	ENSMUSG00000021520, ENSMUSG00000037916, ENSMUSG00000079323, ENSMUSG00000028964, ENSMUSG00000025428, ENSMUSG00000032596, ENSMUSG00000025393, ENSMUSG00000031633, ENSMUSG00000020153, ENSMUSG00000025781, ENSMUSG00000065947, ENSMUSG00000064363	2.97537	6.59265	0.0659265
GOTERM_BP_5	GO:0007268~synaptic transmission	18	2.01467e-06	ENSMUSG00000028964, ENSMUSG00000015733, ENSMUSG00000031144, ENSMUSG00000034656, ENSMUSG00000028161, ENSMUSG00000027577, ENSMUSG00000033981, ENSMUSG00000030519, ENSMUSG00000031840, ENSMUSG00000042429, ENSMUSG00000009394, ENSMUSG00000022973, ENSMUSG00000035864, ENSMUSG00000039953, ENSMUSG00000031633, ENSMUSG00000057914, ENSMUSG00000063077, ENSMUSG00000022607	4.06882	0.00316141	3.16141e-05
GOTERM_BP_5	GO:0031175~neuron projection development	18	2.9867e-05	ENSMUSG00000020598, ENSMUSG00000015222, ENSMUSG00000037032, ENSMUSG00000020792, ENSMUSG00000026782, ENSMUSG00000034656, ENSMUSG00000022037, ENSMUSG00000052516, ENSMUSG00000021066, ENSMUSG00000025085, ENSMUSG00000031840, ENSMUSG00000043733, ENSMUSG00000079076, ENSMUSG00000027797, ENSMUSG00000030774, ENSMUSG00000032356, ENSMUSG00000020950, ENSMUSG00000022607, ENSMUSG00000026131	3.32224	0.0468574	0.000468574
GOTERM_BP_5	GO:0050804~regulation of synaptic transmission	12	3.58722e-05	ENSMUSG00000033208, ENSMUSG00000042429, ENSMUSG00000032356, ENSMUSG00000037996, ENSMUSG00000041670, ENSMUSG00000031144, ENSMUSG00000028161, ENSMUSG00000034656, ENSMUSG00000033981, ENSMUSG00000020886, ENSMUSG00000031840, ENSMUSG00000024617	4.82833	0.0562764	0.000562764
GOTERM_BP_5	GO:0016310~phosphorylation	37	4.16699e-05	ENSMUSG00000015222, ENSMUSG00000029334, ENSMUSG00000025855, ENSMUSG00000019210, ENSMUSG00000028926, ENSMUSG00000028530, ENSMUSG00000059146, ENSMUSG00000065947, ENSMUSG00000024617, ENSMUSG00000064363, ENSMUSG00000026034, ENSMUSG00000026437, ENSMUSG00000042429, ENSMUSG00000043733, ENSMUSG00000019087, ENSMUSG00000025428, ENSMUSG00000052155, ENSMUSG00000052889, ENSMUSG00000057230, ENSMUSG00000022607,…	2.07345	0.0653691	0.000653691
GOTERM_BP_5	GO:0051969~regulation of transmission of nerve impulse	12	6.7312e-05	ENSMUSG00000033208, ENSMUSG00000042429, ENSMUSG00000032356, ENSMUSG00000037996, ENSMUSG00000041670, ENSMUSG00000031144, ENSMUSG00000028161, ENSMUSG00000034656, ENSMUSG00000033981, ENSMUSG00000020886, ENSMUSG00000031840, ENSMUSG00000024617	4.51246	0.105575	0.00105575
GOTERM_BP_5	GO:0015031~protein transport	34	7.18278e-05	ENSMUSG00000030172, ENSMUSG00000041670, ENSMUSG00000029430, ENSMUSG00000000538, ENSMUSG00000040722, ENSMUSG00000024580, ENSMUSG00000063801, ENSMUSG00000018326, ENSMUSG00000028649, ENSMUSG00000027438, ENSMUSG00000025484, ENSMUSG00000015291, ENSMUSG00000028136, ENSMUSG00000034187, ENSMUSG00000027291, ENSMUSG00000027522, ENSMUSG00000018481, ENSMUSG00000020946, ENSMUSG00000020792, ENSMUSG00000024851,…	2.10142	0.112654	0.00112654
GOTERM_BP_5	GO:0006464~protein modification process	54	7.77639e-05	ENSMUSG00000029334, ENSMUSG00000025855, ENSMUSG00000028530, ENSMUSG00000035247, ENSMUSG00000059146, ENSMUSG00000030451, ENSMUSG00000024639, ENSMUSG00000026437, ENSMUSG00000043733, ENSMUSG00000052155, ENSMUSG00000052889, ENSMUSG00000022607, ENSMUSG00000033862, ENSMUSG00000062270, ENSMUSG00000079323, ENSMUSG00000015733, ENSMUSG00000026782, ENSMUSG00000063358, ENSMUSG00000026484, ENSMUSG00000030774,…	1.7244	0.121959	0.00121959
GOTERM_BP_5	GO:0031644~regulation of neurological system process	12	0.000110743	ENSMUSG00000033208, ENSMUSG00000042429, ENSMUSG00000032356, ENSMUSG00000037996, ENSMUSG00000041670, ENSMUSG00000031144, ENSMUSG00000028161, ENSMUSG00000034656, ENSMUSG00000033981, ENSMUSG00000020886, ENSMUSG00000031840, ENSMUSG00000024617	4.27286	0.173638	0.00173638
GOTERM_BP_5	GO:0048666~neuron development	20	0.000121366	ENSMUSG00000020598, ENSMUSG00000015222, ENSMUSG00000037032, ENSMUSG00000020792, ENSMUSG00000026782, ENSMUSG00000034656, ENSMUSG00000022037, ENSMUSG00000052516, ENSMUSG00000021066, ENSMUSG00000025085, ENSMUSG00000031840, ENSMUSG00000024639, ENSMUSG00000043733, ENSMUSG00000079076, ENSMUSG00000027797, ENSMUSG00000030774, ENSMUSG00000032356, ENSMUSG00000022982, ENSMUSG00000020950, ENSMUSG00000022607,…	2.75589	0.19028	0.0019028
GOTERM_BP_5	GO:0022008~neurogenesis	29	0.000163361	ENSMUSG00000020598, ENSMUSG00000019874, ENSMUSG00000015222, ENSMUSG00000031425, ENSMUSG00000037032, ENSMUSG00000059146, ENSMUSG00000052516, ENSMUSG00000025085, ENSMUSG00000024639, ENSMUSG00000018411, ENSMUSG00000043733, ENSMUSG00000036766, ENSMUSG00000022607, ENSMUSG00000048799, ENSMUSG00000026131, ENSMUSG00000020792, ENSMUSG00000015733, ENSMUSG00000026782, ENSMUSG00000034656, ENSMUSG00000022037,…	2.1729	0.256042	0.00256042
GOTERM_BP_5	GO:0044267~cellular protein metabolic process	77	0.000225286	ENSMUSG00000021037, ENSMUSG00000029334, ENSMUSG00000025855, ENSMUSG00000028530, ENSMUSG00000035247, ENSMUSG00000059146, ENSMUSG00000067194, ENSMUSG00000000804, ENSMUSG00000056629, ENSMUSG00000030451, ENSMUSG00000005610, ENSMUSG00000022884, ENSMUSG00000024639, ENSMUSG00000021266, ENSMUSG00000026437, ENSMUSG00000043733, ENSMUSG00000025757, ENSMUSG00000052155, ENSMUSG00000052889, ENSMUSG00000022607,…	1.4838	0.352937	0.00352937
GOTERM_BP_5	GO:0050801~ion homeostasis	19	0.000368781	ENSMUSG00000033208, ENSMUSG00000031425, ENSMUSG00000028964, ENSMUSG00000032966, ENSMUSG00000026904, ENSMUSG00000034656, ENSMUSG00000028161, ENSMUSG00000027577, ENSMUSG00000034781, ENSMUSG00000041607, ENSMUSG00000028854, ENSMUSG00000024639, ENSMUSG00000042429, ENSMUSG00000037996, ENSMUSG00000022982, ENSMUSG00000039953, ENSMUSG00000021313, ENSMUSG00000052889, ENSMUSG00000029064	2.60916	0.577131	0.00577131
GOTERM_BP_5	GO:0006886~intracellular protein transport	18	0.000518462	ENSMUSG00000027522, ENSMUSG00000020946, ENSMUSG00000029430, ENSMUSG00000041670, ENSMUSG00000000538, ENSMUSG00000028161, ENSMUSG00000018326, ENSMUSG00000063801, ENSMUSG00000024580, ENSMUSG00000003731, ENSMUSG00000002319, ENSMUSG00000028649, ENSMUSG00000027438, ENSMUSG00000047126, ENSMUSG00000027799, ENSMUSG00000006005, ENSMUSG00000010392, ENSMUSG00000038324	2.62409	0.810487	0.00810487
GOTERM_BP_5	GO:0000902~cell morphogenesis	19	0.000690794	ENSMUSG00000020598, ENSMUSG00000037032, ENSMUSG00000034656, ENSMUSG00000022037, ENSMUSG00000052516, ENSMUSG00000021066, ENSMUSG00000025085, ENSMUSG00000031840, ENSMUSG00000028059, ENSMUSG00000028649, ENSMUSG00000043733, ENSMUSG00000079076, ENSMUSG00000027797, ENSMUSG00000022982, ENSMUSG00000029106, ENSMUSG00000045180, ENSMUSG00000020950, ENSMUSG00000024781, ENSMUSG00000022607, ENSMUSG00000026131	2.47406	1.07852	0.0107852
GOTERM_BP_5	GO:0055082~cellular chemical homeostasis	17	0.00104792	ENSMUSG00000033208, ENSMUSG00000031425, ENSMUSG00000028964, ENSMUSG00000032966, ENSMUSG00000034656, ENSMUSG00000028161, ENSMUSG00000027577, ENSMUSG00000034781, ENSMUSG00000041607, ENSMUSG00000024639, ENSMUSG00000042429, ENSMUSG00000037996, ENSMUSG00000022982, ENSMUSG00000039953, ENSMUSG00000021313, ENSMUSG00000052889, ENSMUSG00000029064	2.55229	1.63182	0.0163182
GOTERM_BP_5	GO:0048699~generation of neurons	25	0.00139786	ENSMUSG00000020598, ENSMUSG00000015222, ENSMUSG00000037032, ENSMUSG00000059146, ENSMUSG00000052516, ENSMUSG00000025085, ENSMUSG00000024639, ENSMUSG00000018411, ENSMUSG00000043733, ENSMUSG00000022607, ENSMUSG00000026131, ENSMUSG00000020792, ENSMUSG00000015733, ENSMUSG00000026782, ENSMUSG00000034656, ENSMUSG00000022037, ENSMUSG00000020423, ENSMUSG00000031840, ENSMUSG00000021066, ENSMUSG00000027797,…	2.02395	2.17116	0.0217116
GOTERM_BP_5	GO:0048812~neuron projection morphogenesis	13	0.00144972	ENSMUSG00000020598, ENSMUSG00000037032, ENSMUSG00000034656, ENSMUSG00000022037, ENSMUSG00000052516, ENSMUSG00000021066, ENSMUSG00000031840, ENSMUSG00000025085, ENSMUSG00000043733, ENSMUSG00000027797, ENSMUSG00000079076, ENSMUSG00000020950, ENSMUSG00000022607, ENSMUSG00000026131	2.97198	2.25086	0.0225086
GOTERM_BP_5	GO:0048667~cell morphogenesis involved in neuron differentiation	13	0.0019128	ENSMUSG00000020598, ENSMUSG00000037032, ENSMUSG00000034656, ENSMUSG00000052516, ENSMUSG00000021066, ENSMUSG00000031840, ENSMUSG00000025085, ENSMUSG00000043733, ENSMUSG00000027797, ENSMUSG00000079076, ENSMUSG00000022982, ENSMUSG00000020950, ENSMUSG00000022607, ENSMUSG00000026131	2.874	2.95978	0.0295978
GOTERM_BP_5	GO:0015986~ATP synthesis coupled proton transport	6	0.00205323	ENSMUSG00000019087, ENSMUSG00000052459, ENSMUSG00000025428, ENSMUSG00000019210, ENSMUSG00000025393, ENSMUSG00000025781	6.52477	3.17382	0.0317382
GOTERM_BP_5	GO:0015985~energy coupled proton transport, down electrochemical gradient	6	0.00205323	ENSMUSG00000019087, ENSMUSG00000052459, ENSMUSG00000025428, ENSMUSG00000019210, ENSMUSG00000025393, ENSMUSG00000025781	6.52477	3.17382	0.0317382
GOTERM_BP_5	GO:0006897~endocytosis	13	0.00251802	ENSMUSG00000034799, ENSMUSG00000037902, ENSMUSG00000031144, ENSMUSG00000034940, ENSMUSG00000033981, ENSMUSG00000020886, ENSMUSG00000024924, ENSMUSG00000031840, ENSMUSG00000027087, ENSMUSG00000020524, ENSMUSG00000022973, ENSMUSG00000026825, ENSMUSG00000030605	2.78228	3.87907	0.0387907
GOTERM_BP_5	GO:0042391~regulation of membrane potential	10	0.00278844	ENSMUSG00000042429, ENSMUSG00000031425, ENSMUSG00000028964, ENSMUSG00000022982, ENSMUSG00000028161, ENSMUSG00000034656, ENSMUSG00000027577, ENSMUSG00000034781, ENSMUSG00000041607, ENSMUSG00000024639	3.38118	4.28716	0.0428716
GOTERM_BP_5	GO:0048488~synaptic vesicle endocytosis	4	0.00280458	ENSMUSG00000034799, ENSMUSG00000022973, ENSMUSG00000020886, ENSMUSG00000031840	13.412	4.31147	0.0431147
GOTERM_BP_5	GO:0034220~ion transmembrane transport	6	0.00362346	ENSMUSG00000019087, ENSMUSG00000052459, ENSMUSG00000025428, ENSMUSG00000019210, ENSMUSG00000025393, ENSMUSG00000025781	5.74801	5.53711	0.0553711
GOTERM_BP_5	GO:0001505~regulation of neurotransmitter levels	7	0.00422103	ENSMUSG00000028964, ENSMUSG00000009394, ENSMUSG00000022973, ENSMUSG00000035864, ENSMUSG00000034656, ENSMUSG00000031633, ENSMUSG00000031840	4.54278	6.42222	0.0642222
GOTERM_BP_5	GO:0008380~RNA splicing	13	0.00431063	ENSMUSG00000024268, ENSMUSG00000020719, ENSMUSG00000020180, ENSMUSG00000020863, ENSMUSG00000032580, ENSMUSG00000060373, ENSMUSG00000028821, ENSMUSG00000028820, ENSMUSG00000020850, ENSMUSG00000046434, ENSMUSG00000007850, ENSMUSG00000021039, ENSMUSG00000002107	2.60233	6.55426	0.0655426
GOTERM_BP_5	GO:0048858~cell projection morphogenesis	13	0.00448255	ENSMUSG00000020598, ENSMUSG00000037032, ENSMUSG00000034656, ENSMUSG00000022037, ENSMUSG00000052516, ENSMUSG00000021066, ENSMUSG00000031840, ENSMUSG00000025085, ENSMUSG00000043733, ENSMUSG00000027797, ENSMUSG00000079076, ENSMUSG00000020950, ENSMUSG00000022607, ENSMUSG00000026131	2.58945	6.80714	0.0680714
GOTERM_BP_5	GO:0031110~regulation of microtubule polymerization or depolymerization	5	0.00472749	ENSMUSG00000018411, ENSMUSG00000015222, ENSMUSG00000015733, ENSMUSG00000026131, ENSMUSG00000028059	7.18501	7.1663	0.071663
GOTERM_BP_5	GO:0007172~signal complex assembly	4	0.00548979	ENSMUSG00000030774, ENSMUSG00000034656, ENSMUSG00000022607, ENSMUSG00000059456	10.7296	8.2758	0.082758
GOTERM_BP_5	GO:0016188~synaptic vesicle maturation	3	0.00582115	ENSMUSG00000034799, ENSMUSG00000020886, ENSMUSG00000031840	24.1416	8.75421	0.0875421
GOTERM_BP_5	GO:0006887~exocytosis	9	0.00596825	ENSMUSG00000034799, ENSMUSG00000038453, ENSMUSG00000041670, ENSMUSG00000020792, ENSMUSG00000022973, ENSMUSG00000040722, ENSMUSG00000034656, ENSMUSG00000025867, ENSMUSG00000031840	3.29204	8.96584	0.0896584
GOTERM_BP_5	GO:0007611~learning or memory	8	0.00650927	ENSMUSG00000033208, ENSMUSG00000020524, ENSMUSG00000037032, ENSMUSG00000025855, ENSMUSG00000037996, ENSMUSG00000022973, ENSMUSG00000026782, ENSMUSG00000021670	3.61672	9.74024	0.0974024
GOTERM_BP_5	GO:0000904~cell morphogenesis involved in differentiation	13	0.00654057	ENSMUSG00000020598, ENSMUSG00000037032, ENSMUSG00000034656, ENSMUSG00000052516, ENSMUSG00000021066, ENSMUSG00000031840, ENSMUSG00000025085, ENSMUSG00000043733, ENSMUSG00000027797, ENSMUSG00000079076, ENSMUSG00000022982, ENSMUSG00000020950, ENSMUSG00000022607, ENSMUSG00000026131	2.46731	9.78485	0.0978485
GOTERM_BP_5	GO:0032990~cell part morphogenesis	13	0.00654057	ENSMUSG00000020598, ENSMUSG00000037032, ENSMUSG00000034656, ENSMUSG00000022037, ENSMUSG00000052516, ENSMUSG00000021066, ENSMUSG00000031840, ENSMUSG00000025085, ENSMUSG00000043733, ENSMUSG00000027797, ENSMUSG00000079076, ENSMUSG00000020950, ENSMUSG00000022607, ENSMUSG00000026131	2.46731	9.78485	0.0978485
GOTERM_CC_5	GO:0005737~cytoplasm	244	1.13584e-18	ENSMUSG00000016382, ENSMUSG00000009569, ENSMUSG00000024268, ENSMUSG00000037916, ENSMUSG00000046785, ENSMUSG00000032393, ENSMUSG00000043940, ENSMUSG00000018707, ENSMUSG00000054728, ENSMUSG00000037058, ENSMUSG00000019370, ENSMUSG00000032503, ENSMUSG00000021266, ENSMUSG00000029581, ENSMUSG00000025484, ENSMUSG00000036438, ENSMUSG00000009394, ENSMUSG00000022789, ENSMUSG00000038412, ENSMUSG00000053581,…	1.50149	1.49256e-15	1.49256e-17
GOTERM_CC_5	GO:0044444~cytoplasmic part	157	4.16111e-09	ENSMUSG00000037916, ENSMUSG00000046785, ENSMUSG00000028249, ENSMUSG00000029430, ENSMUSG00000043940, ENSMUSG00000029432, ENSMUSG00000056629, ENSMUSG00000030451, ENSMUSG00000027199, ENSMUSG00000028059, ENSMUSG00000031584, ENSMUSG00000056429, ENSMUSG00000028649, ENSMUSG00000025484, ENSMUSG00000009394, ENSMUSG00000022789, ENSMUSG00000038412, ENSMUSG00000006800, ENSMUSG00000021313, ENSMUSG00000025290,…	1.49351	5.46794e-06	5.46794e-08
GOTERM_CC_5	GO:0043229~intracellular organelle	256	2.2907e-08	ENSMUSG00000009569, ENSMUSG00000024268, ENSMUSG00000037916, ENSMUSG00000046785, ENSMUSG00000043940, ENSMUSG00000018707, ENSMUSG00000019370, ENSMUSG00000025484, ENSMUSG00000036438, ENSMUSG00000009394, ENSMUSG00000038412, ENSMUSG00000000948, ENSMUSG00000053581, ENSMUSG00000042699, ENSMUSG00000025781, ENSMUSG00000009575, ENSMUSG00000079562, ENSMUSG00000027104, ENSMUSG00000038914, ENSMUSG00000003360,…	1.24471	3.01012e-05	3.01012e-07
GOTERM_CC_5	GO:0005829~cytosol	33	8.23438e-06	ENSMUSG00000021037, ENSMUSG00000027347, ENSMUSG00000019210, ENSMUSG00000028926, ENSMUSG00000020176, ENSMUSG00000020720, ENSMUSG00000007564, ENSMUSG00000018411, ENSMUSG00000058756, ENSMUSG00000022789, ENSMUSG00000029649, ENSMUSG00000021288, ENSMUSG00000028136, ENSMUSG00000022607, ENSMUSG00000025290, ENSMUSG00000052459, ENSMUSG00000015733, ENSMUSG00000020792, ENSMUSG00000026782, ENSMUSG00000034940,…	2.39245	0.0108199	0.000108199
GOTERM_CC_5	GO:0019898~extrinsic to membrane	30	8.26348e-06	ENSMUSG00000027347, ENSMUSG00000030172, ENSMUSG00000034799, ENSMUSG00000028249, ENSMUSG00000041670, ENSMUSG00000043940, ENSMUSG00000028530, ENSMUSG00000034781, ENSMUSG00000026123, ENSMUSG00000020886, ENSMUSG00000056629, ENSMUSG00000017144, ENSMUSG00000024639, ENSMUSG00000027438, ENSMUSG00000022789, ENSMUSG00000031748, ENSMUSG00000052889, ENSMUSG00000029064, ENSMUSG00000057230, ENSMUSG00000027291,…	2.52977	0.0108581	0.000108581
GOTERM_CC_5	GO:0044446~intracellular organelle part	116	1.02321e-05	ENSMUSG00000037916, ENSMUSG00000032580, ENSMUSG00000043940, ENSMUSG00000018707, ENSMUSG00000020886, ENSMUSG00000030451, ENSMUSG00000027199, ENSMUSG00000019370, ENSMUSG00000028059, ENSMUSG00000056429, ENSMUSG00000025484, ENSMUSG00000036438, ENSMUSG00000009394, ENSMUSG00000000948, ENSMUSG00000006800, ENSMUSG00000021313, ENSMUSG00000025290, ENSMUSG00000042699, ENSMUSG00000021068, ENSMUSG00000031592,…	1.44552	0.0134448	0.000134448
GOTERM_CC_5	GO:0030425~dendrite	13	1.97191e-05	ENSMUSG00000032076, ENSMUSG00000042429, ENSMUSG00000038084, ENSMUSG00000015222, ENSMUSG00000026782, ENSMUSG00000022982, ENSMUSG00000034656, ENSMUSG00000033981, ENSMUSG00000036766, ENSMUSG00000059213, ENSMUSG00000025867, ENSMUSG00000028059, ENSMUSG00000058589	4.70383	0.0259089	0.000259089
GOTERM_CC_5	GO:0030054~cell junction	29	2.0773e-05	ENSMUSG00000034799, ENSMUSG00000005338, ENSMUSG00000041670, ENSMUSG00000007617, ENSMUSG00000040722, ENSMUSG00000027577, ENSMUSG00000020886, ENSMUSG00000054728, ENSMUSG00000028059, ENSMUSG00000024617, ENSMUSG00000043733, ENSMUSG00000009394, ENSMUSG00000003657, ENSMUSG00000022607, ENSMUSG00000032589, ENSMUSG00000026131, ENSMUSG00000059456, ENSMUSG00000015733, ENSMUSG00000026782, ENSMUSG00000031144,…	2.45585	0.0272935	0.000272935
GOTERM_CC_5	GO:0033178~proton-transporting two-sector ATPase complex, catalytic domain	6	4.63388e-05	ENSMUSG00000019087, ENSMUSG00000052459, ENSMUSG00000025428, ENSMUSG00000019210, ENSMUSG00000025393, ENSMUSG00000025781	14.0477	0.0608748	0.000608748
GOTERM_CC_5	GO:0043231~intracellular membrane-bounded organelle	219	5.97387e-05	ENSMUSG00000009569, ENSMUSG00000024268, ENSMUSG00000037916, ENSMUSG00000046785, ENSMUSG00000043940, ENSMUSG00000025484, ENSMUSG00000009394, ENSMUSG00000038412, ENSMUSG00000000948, ENSMUSG00000053581, ENSMUSG00000042699, ENSMUSG00000025781, ENSMUSG00000009575, ENSMUSG00000027104, ENSMUSG00000079562, ENSMUSG00000038914, ENSMUSG00000003360, ENSMUSG00000061904, ENSMUSG00000039953, ENSMUSG00000025393,…	1.20146	0.0784716	0.000784716
GOTERM_CC_5	GO:0005856~cytoskeleton	49	0.000177024	ENSMUSG00000007617, ENSMUSG00000028530, ENSMUSG00000038244, ENSMUSG00000018707, ENSMUSG00000020886, ENSMUSG00000074657, ENSMUSG00000019370, ENSMUSG00000067889, ENSMUSG00000028059, ENSMUSG00000028649, ENSMUSG00000043733, ENSMUSG00000038453, ENSMUSG00000036438, ENSMUSG00000048799, ENSMUSG00000022607, ENSMUSG00000032589, ENSMUSG00000018481, ENSMUSG00000015733, ENSMUSG00000026782, ENSMUSG00000026830,…	1.73822	0.232369	0.00232369
GOTERM_CC_5	GO:0031410~cytoplasmic vesicle	28	0.000199551	ENSMUSG00000028249, ENSMUSG00000029430, ENSMUSG00000040722, ENSMUSG00000002320, ENSMUSG00000063801, ENSMUSG00000018326, ENSMUSG00000056429, ENSMUSG00000009394, ENSMUSG00000021288, ENSMUSG00000026131, ENSMUSG00000025980, ENSMUSG00000018481, ENSMUSG00000015733, ENSMUSG00000031144, ENSMUSG00000035798, ENSMUSG00000033981, ENSMUSG00000031840, ENSMUSG00000032076, ENSMUSG00000021939, ENSMUSG00000047126,…	2.19379	0.261904	0.00261904
GOTERM_CC_5	GO:0005874~microtubule	17	0.000369328	ENSMUSG00000015222, ENSMUSG00000070730, ENSMUSG00000018481, ENSMUSG00000021068, ENSMUSG00000018707, ENSMUSG00000074657, ENSMUSG00000028059, ENSMUSG00000018411, ENSMUSG00000047459, ENSMUSG00000014602, ENSMUSG00000020668, ENSMUSG00000018567, ENSMUSG00000045180, ENSMUSG00000041298, ENSMUSG00000026825, ENSMUSG00000063077, ENSMUSG00000021288	2.81929	0.484231	0.00484231
GOTERM_CC_5	GO:0044431~Golgi apparatus part	16	0.000613152	ENSMUSG00000008153, ENSMUSG00000030701, ENSMUSG00000020946, ENSMUSG00000026811, ENSMUSG00000040722, ENSMUSG00000063801, ENSMUSG00000021066, ENSMUSG00000056429, ENSMUSG00000003316, ENSMUSG00000079076, ENSMUSG00000047126, ENSMUSG00000027799, ENSMUSG00000025484, ENSMUSG00000006800, ENSMUSG00000039953, ENSMUSG00000010392, ENSMUSG00000018567	2.8054	0.802725	0.00802725
GOTERM_CC_5	GO:0044459~plasma membrane part	62	0.000870935	ENSMUSG00000028249, ENSMUSG00000005338, ENSMUSG00000019210, ENSMUSG00000007617, ENSMUSG00000041670, ENSMUSG00000043940, ENSMUSG00000059146, ENSMUSG00000040722, ENSMUSG00000020886, ENSMUSG00000054728, ENSMUSG00000052516, ENSMUSG00000028059, ENSMUSG00000024639, ENSMUSG00000031584, ENSMUSG00000026576, ENSMUSG00000043733, ENSMUSG00000003273, ENSMUSG00000009394, ENSMUSG00000031748, ENSMUSG00000029064,…	1.51115	1.13843	0.0113843
GOTERM_CC_5	GO:0043232~intracellular non-membrane-bounded organelle	70	0.00108871	ENSMUSG00000074457, ENSMUSG00000007617, ENSMUSG00000038244, ENSMUSG00000028530, ENSMUSG00000019923, ENSMUSG00000018707, ENSMUSG00000020886, ENSMUSG00000019370, ENSMUSG00000074657, ENSMUSG00000028059, ENSMUSG00000067889, ENSMUSG00000028649, ENSMUSG00000043733, ENSMUSG00000038453, ENSMUSG00000036438, ENSMUSG00000032480, ENSMUSG00000022607, ENSMUSG00000048799, ENSMUSG00000032589, ENSMUSG00000025290,…	1.45186	1.42121	0.0142121
GOTERM_CC_5	GO:0030424~axon	10	0.0014583	ENSMUSG00000032076, ENSMUSG00000018411, ENSMUSG00000020598, ENSMUSG00000042429, ENSMUSG00000030774, ENSMUSG00000022762, ENSMUSG00000026830, ENSMUSG00000041607, ENSMUSG00000052516, ENSMUSG00000021288	3.71978	1.89942	0.0189942
GOTERM_CC_5	GO:0016023~cytoplasmic membrane-bounded vesicle	22	0.00179332	ENSMUSG00000028249, ENSMUSG00000018481, ENSMUSG00000029430, ENSMUSG00000015733, ENSMUSG00000031144, ENSMUSG00000040722, ENSMUSG00000033981, ENSMUSG00000018326, ENSMUSG00000031840, ENSMUSG00000032076, ENSMUSG00000056429, ENSMUSG00000021939, ENSMUSG00000047126, ENSMUSG00000009394, ENSMUSG00000035864, ENSMUSG00000056553, ENSMUSG00000024122, ENSMUSG00000020048, ENSMUSG00000063077, ENSMUSG00000025980,…	2.11506	2.33104	0.0233104
GOTERM_CC_5	GO:0005794~Golgi apparatus	31	0.00200076	ENSMUSG00000027347, ENSMUSG00000008153, ENSMUSG00000030172, ENSMUSG00000040722, ENSMUSG00000063801, ENSMUSG00000017144, ENSMUSG00000028059, ENSMUSG00000056429, ENSMUSG00000003316, ENSMUSG00000027438, ENSMUSG00000025484, ENSMUSG00000001576, ENSMUSG00000006800, ENSMUSG00000050967, ENSMUSG00000027522, ENSMUSG00000030701, ENSMUSG00000020946, ENSMUSG00000024851, ENSMUSG00000026811, ENSMUSG00000034940,…	1.80917	2.59742	0.0259742
GOTERM_CC_5	GO:0005783~endoplasmic reticulum	36	0.00210226	ENSMUSG00000021037, ENSMUSG00000008153, ENSMUSG00000027347, ENSMUSG00000046785, ENSMUSG00000025240, ENSMUSG00000003721, ENSMUSG00000003814, ENSMUSG00000056629, ENSMUSG00000025421, ENSMUSG00000027438, ENSMUSG00000042429, ENSMUSG00000001576, ENSMUSG00000006800, ENSMUSG00000021313, ENSMUSG00000050967, ENSMUSG00000059811, ENSMUSG00000050565, ENSMUSG00000020946, ENSMUSG00000024851, ENSMUSG00000022136,…	1.70986	2.7275	0.027275
GOTERM_CC_5	GO:0015630~microtubule cytoskeleton	23	0.00222405	ENSMUSG00000015222, ENSMUSG00000070730, ENSMUSG00000018481, ENSMUSG00000021068, ENSMUSG00000031592, ENSMUSG00000018707, ENSMUSG00000019370, ENSMUSG00000074657, ENSMUSG00000021395, ENSMUSG00000028059, ENSMUSG00000028649, ENSMUSG00000018411, ENSMUSG00000036438, ENSMUSG00000047459, ENSMUSG00000014602, ENSMUSG00000020668, ENSMUSG00000018567, ENSMUSG00000045180, ENSMUSG00000041298, ENSMUSG00000026825,…	2.03431	2.8834	0.028834
GOTERM_CC_5	GO:0000139~Golgi membrane	11	0.00236003	ENSMUSG00000003316, ENSMUSG00000008153, ENSMUSG00000030701, ENSMUSG00000047126, ENSMUSG00000020946, ENSMUSG00000025484, ENSMUSG00000026811, ENSMUSG00000039953, ENSMUSG00000040722, ENSMUSG00000018567, ENSMUSG00000010392	3.19576	3.05717	0.0305717
GOTERM_CC_5	GO:0016323~basolateral plasma membrane	11	0.00291142	ENSMUSG00000032076, ENSMUSG00000026576, ENSMUSG00000042429, ENSMUSG00000030774, ENSMUSG00000003273, ENSMUSG00000015733, ENSMUSG00000026904, ENSMUSG00000028854, ENSMUSG00000022607, ENSMUSG00000059456, ENSMUSG00000026131	3.1051	3.75889	0.0375889
GOTERM_CC_5	GO:0012506~vesicle membrane	9	0.00299018	ENSMUSG00000018481, ENSMUSG00000047126, ENSMUSG00000009394, ENSMUSG00000015733, ENSMUSG00000031144, ENSMUSG00000035864, ENSMUSG00000033981, ENSMUSG00000059923, ENSMUSG00000063077	3.69294	3.85874	0.0385874
GOTERM_CC_5	GO:0032281~alpha-amino-3-hydroxy-5-methyl-4-isoxazolepropionic acid selective glutamate receptor complex	3	0.00363242	ENSMUSG00000020524, ENSMUSG00000033981, ENSMUSG00000020886	29.8513	4.66937	0.0466937
GOTERM_CC_5	GO:0016469~proton-transporting two-sector ATPase complex	6	0.00381403	ENSMUSG00000019087, ENSMUSG00000052459, ENSMUSG00000025428, ENSMUSG00000019210, ENSMUSG00000025393, ENSMUSG00000025781	5.68595	4.89745	0.0489745
GOTERM_CC_5	GO:0015629~actin cytoskeleton	13	0.00560623	ENSMUSG00000062825, ENSMUSG00000015733, ENSMUSG00000067889, ENSMUSG00000025085, ENSMUSG00000026421, ENSMUSG00000028649, ENSMUSG00000079562, ENSMUSG00000043733, ENSMUSG00000038453, ENSMUSG00000005103, ENSMUSG00000018567, ENSMUSG00000045180, ENSMUSG00000026131	2.52401	7.12135	0.0712135
GOTERM_CC_5	GO:0030659~cytoplasmic vesicle membrane	8	0.00614306	ENSMUSG00000018481, ENSMUSG00000047126, ENSMUSG00000009394, ENSMUSG00000015733, ENSMUSG00000031144, ENSMUSG00000035864, ENSMUSG00000033981, ENSMUSG00000063077	3.65992	7.77808	0.0777808
GOTERM_MF_5	GO:0032559~adenyl ribonucleotide binding	63	1.83964e-06	ENSMUSG00000029334, ENSMUSG00000025855, ENSMUSG00000028530, ENSMUSG00000059146, ENSMUSG00000018707, ENSMUSG00000074657, ENSMUSG00000022884, ENSMUSG00000021266, ENSMUSG00000026473, ENSMUSG00000026437, ENSMUSG00000009394, ENSMUSG00000032480, ENSMUSG00000025757, ENSMUSG00000026223, ENSMUSG00000052155, ENSMUSG00000052889, ENSMUSG00000022607, ENSMUSG00000013662, ENSMUSG00000042699, ENSMUSG00000034187,…	1.81517	0.00215103	2.15103e-05
GOTERM_MF_5	GO:0016462~pyrophosphatase activity	36	2.67812e-06	ENSMUSG00000038084, ENSMUSG00000019210, ENSMUSG00000029430, ENSMUSG00000034781, ENSMUSG00000018707, ENSMUSG00000074657, ENSMUSG00000022884, ENSMUSG00000024639, ENSMUSG00000026576, ENSMUSG00000019087, ENSMUSG00000028646, ENSMUSG00000025428, ENSMUSG00000022789, ENSMUSG00000032480, ENSMUSG00000031748, ENSMUSG00000029064, ENSMUSG00000058594, ENSMUSG00000026825, ENSMUSG00000021288, ENSMUSG00000013662,…	2.3662	0.00313143	3.13143e-05
GOTERM_MF_5	GO:0005509~calcium ion binding	37	0.00033812	ENSMUSG00000016382, ENSMUSG00000004263, ENSMUSG00000033208, ENSMUSG00000027347, ENSMUSG00000008153, ENSMUSG00000005338, ENSMUSG00000022454, ENSMUSG00000025854, ENSMUSG00000074457, ENSMUSG00000003814, ENSMUSG00000024924, ENSMUSG00000019370, ENSMUSG00000028649, ENSMUSG00000034009, ENSMUSG00000036438, ENSMUSG00000003657, ENSMUSG00000006800, ENSMUSG00000021313, ENSMUSG00000026827, ENSMUSG00000052889,…	1.8529	0.394642	0.00394642
GOTERM_MF_5	GO:0042625~ATPase activity, coupled to transmembrane movement of ions	8	0.00118236	ENSMUSG00000026576, ENSMUSG00000019087, ENSMUSG00000052459, ENSMUSG00000025428, ENSMUSG00000019210, ENSMUSG00000025393, ENSMUSG00000027546, ENSMUSG00000025781	4.8772	1.3738	0.013738
GOTERM_MF_5	GO:0008017~microtubule binding	7	0.00309572	ENSMUSG00000028649, ENSMUSG00000018411, ENSMUSG00000018481, ENSMUSG00000018567, ENSMUSG00000063077, ENSMUSG00000026131, ENSMUSG00000028059	4.82723	3.56044	0.0356044
GOTERM_MF_5	GO:0042626~ATPase activity, coupled to transmembrane movement of substances	8	0.00806845	ENSMUSG00000026576, ENSMUSG00000019087, ENSMUSG00000052459, ENSMUSG00000025428, ENSMUSG00000019210, ENSMUSG00000025393, ENSMUSG00000027546, ENSMUSG00000025781	3.46935	9.03772	0.0903772

## Sheet: CON-SI
Category	Term	Count	PValue	Genes	Fold Enrichment	FDR [%]	FDR faction
KEGG_PATHWAY	mmu04720:Long-term potentiation	8	0.00147236	ENSMUSG00000028161, ENSMUSG00000063358, ENSMUSG00000030102, ENSMUSG00000033981, ENSMUSG00000049583, ENSMUSG00000019370, ENSMUSG00000024617, ENSMUSG00000051177	4.65086	1.66957	0.0166957
GOTERM_BP_5	GO:0007268~synaptic transmission	19	7.26151e-08	ENSMUSG00000030806, ENSMUSG00000021071, ENSMUSG00000052572, ENSMUSG00000047879, ENSMUSG00000028161, ENSMUSG00000033981, ENSMUSG00000025892, ENSMUSG00000020402, ENSMUSG00000026797, ENSMUSG00000020894, ENSMUSG00000009394, ENSMUSG00000022973, ENSMUSG00000019906, ENSMUSG00000027273, ENSMUSG00000063077, ENSMUSG00000008892, ENSMUSG00000022607, ENSMUSG00000066392, ENSMUSG00000007097	4.8337	0.000113526	1.13526e-06
GOTERM_BP_5	GO:0044267~cellular protein metabolic process	79	6.78685e-07	ENSMUSG00000013236, ENSMUSG00000005371, ENSMUSG00000020032, ENSMUSG00000031154, ENSMUSG00000030357, ENSMUSG00000047879, ENSMUSG00000000740, ENSMUSG00000029471, ENSMUSG00000029512, ENSMUSG00000030451, ENSMUSG00000004364, ENSMUSG00000032604, ENSMUSG00000022884, ENSMUSG00000004865, ENSMUSG00000033545, ENSMUSG00000021767, ENSMUSG00000029686, ENSMUSG00000022607, ENSMUSG00000025290, ENSMUSG00000021870,…	1.71334	0.00106105	1.06105e-05
GOTERM_BP_5	GO:0048489~synaptic vesicle transport	7	3.32911e-05	ENSMUSG00000020894, ENSMUSG00000021071, ENSMUSG00000034799, ENSMUSG00000022973, ENSMUSG00000021314, ENSMUSG00000019906, ENSMUSG00000026797	10.9307	0.0520345	0.000520345
GOTERM_BP_5	GO:0007269~neurotransmitter secretion	7	0.000119965	ENSMUSG00000020894, ENSMUSG00000021071, ENSMUSG00000009394, ENSMUSG00000022973, ENSMUSG00000019906, ENSMUSG00000027273, ENSMUSG00000066392	8.80525	0.187389	0.00187389
GOTERM_BP_5	GO:0032940~secretion by cell	14	0.000235432	ENSMUSG00000020894, ENSMUSG00000021071, ENSMUSG00000034799, ENSMUSG00000041670, ENSMUSG00000009394, ENSMUSG00000022973, ENSMUSG00000055254, ENSMUSG00000021687, ENSMUSG00000019906, ENSMUSG00000027273, ENSMUSG00000026797, ENSMUSG00000022587, ENSMUSG00000066392, ENSMUSG00000049044	3.40848	0.367439	0.00367439
GOTERM_BP_5	GO:0001505~regulation of neurotransmitter levels	8	0.000403915	ENSMUSG00000020894, ENSMUSG00000021071, ENSMUSG00000009394, ENSMUSG00000022973, ENSMUSG00000019906, ENSMUSG00000027273, ENSMUSG00000066392, ENSMUSG00000007097	5.84311	0.629615	0.00629615
GOTERM_BP_5	GO:0009966~regulation of signal transduction	29	0.000659073	ENSMUSG00000031442, ENSMUSG00000031996, ENSMUSG00000025658, ENSMUSG00000001986, ENSMUSG00000042700, ENSMUSG00000029512, ENSMUSG00000025422, ENSMUSG00000071369, ENSMUSG00000027177, ENSMUSG00000027255, ENSMUSG00000025555, ENSMUSG00000037706, ENSMUSG00000005871, ENSMUSG00000004056, ENSMUSG00000049044, ENSMUSG00000057113, ENSMUSG00000040249, ENSMUSG00000041992, ENSMUSG00000017376, ENSMUSG00000037126,…	1.98675	1.02544	0.0102544
GOTERM_BP_5	GO:0007611~learning or memory	9	0.00074968	ENSMUSG00000037032, ENSMUSG00000037996, ENSMUSG00000040907, ENSMUSG00000022973, ENSMUSG00000021314, ENSMUSG00000020402, ENSMUSG00000049583, ENSMUSG00000008892, ENSMUSG00000007097	4.57929	1.16564	0.0116564
GOTERM_BP_5	GO:0000904~cell morphogenesis involved in differentiation	14	0.000823083	ENSMUSG00000020598, ENSMUSG00000037032, ENSMUSG00000022443, ENSMUSG00000038970, ENSMUSG00000069601, ENSMUSG00000029512, ENSMUSG00000026797, ENSMUSG00000004364, ENSMUSG00000028832, ENSMUSG00000027797, ENSMUSG00000026442, ENSMUSG00000005871, ENSMUSG00000022607, ENSMUSG00000026131	2.99046	1.27908	0.0127908
GOTERM_BP_5	GO:0007242~intracellular signaling cascade	36	0.000919912	ENSMUSG00000031442, ENSMUSG00000004071, ENSMUSG00000034799, ENSMUSG00000025658, ENSMUSG00000030357, ENSMUSG00000052139, ENSMUSG00000041444, ENSMUSG00000027363, ENSMUSG00000029512, ENSMUSG00000025422, ENSMUSG00000071369, ENSMUSG00000037706, ENSMUSG00000004865, ENSMUSG00000022973, ENSMUSG00000028945, ENSMUSG00000051177, ENSMUSG00000049044, ENSMUSG00000041992, ENSMUSG00000017376, ENSMUSG00000017631,…	1.78167	1.42855	0.0142855
GOTERM_BP_5	GO:0007409~axonogenesis	12	0.000955056	ENSMUSG00000020598, ENSMUSG00000027797, ENSMUSG00000037032, ENSMUSG00000026442, ENSMUSG00000005871, ENSMUSG00000038970, ENSMUSG00000069601, ENSMUSG00000026797, ENSMUSG00000029512, ENSMUSG00000022607, ENSMUSG00000026131, ENSMUSG00000028832	3.3338	1.48274	0.0148274
GOTERM_BP_5	GO:0009142~nucleoside triphosphate biosynthetic process	9	0.00115236	ENSMUSG00000026576, ENSMUSG00000020857, ENSMUSG00000037601, ENSMUSG00000019302, ENSMUSG00000040907, ENSMUSG00000006273, ENSMUSG00000025781, ENSMUSG00000000563, ENSMUSG00000007097	4.29008	1.78648	0.0178648
GOTERM_BP_5	GO:0080135~regulation of cellular response to stress	8	0.00127952	ENSMUSG00000027177, ENSMUSG00000037032, ENSMUSG00000052139, ENSMUSG00000052305, ENSMUSG00000004056, ENSMUSG00000035086, ENSMUSG00000074781, ENSMUSG00000057113	4.83031	1.98178	0.0198178
GOTERM_BP_5	GO:0051493~regulation of cytoskeleton organization	9	0.0015054	ENSMUSG00000026341, ENSMUSG00000003031, ENSMUSG00000005871, ENSMUSG00000029621, ENSMUSG00000049775, ENSMUSG00000029465, ENSMUSG00000026131, ENSMUSG00000028832, ENSMUSG00000057113	4.11674	2.32778	0.0232778
GOTERM_BP_5	GO:0032271~regulation of protein polymerization	7	0.00152009	ENSMUSG00000026341, ENSMUSG00000003031, ENSMUSG00000005871, ENSMUSG00000029621, ENSMUSG00000049775, ENSMUSG00000029465, ENSMUSG00000028832	5.56121	2.35025	0.0235025
GOTERM_BP_5	GO:0050804~regulation of synaptic transmission	9	0.00160582	ENSMUSG00000037996, ENSMUSG00000041670, ENSMUSG00000055254, ENSMUSG00000028161, ENSMUSG00000033981, ENSMUSG00000049583, ENSMUSG00000051790, ENSMUSG00000026797, ENSMUSG00000024617	4.07557	2.48125	0.0248125
GOTERM_BP_5	GO:0048858~cell projection morphogenesis	13	0.0016959	ENSMUSG00000020598, ENSMUSG00000027797, ENSMUSG00000037032, ENSMUSG00000026442, ENSMUSG00000005871, ENSMUSG00000038970, ENSMUSG00000069601, ENSMUSG00000033282, ENSMUSG00000026797, ENSMUSG00000029512, ENSMUSG00000022607, ENSMUSG00000026131, ENSMUSG00000028832	2.91433	2.61872	0.0261872
GOTERM_BP_5	GO:0048812~neuron projection morphogenesis	12	0.00175457	ENSMUSG00000020598, ENSMUSG00000027797, ENSMUSG00000037032, ENSMUSG00000026442, ENSMUSG00000005871, ENSMUSG00000038970, ENSMUSG00000069601, ENSMUSG00000026797, ENSMUSG00000029512, ENSMUSG00000022607, ENSMUSG00000026131, ENSMUSG00000028832	3.08755	2.70814	0.0270814
GOTERM_BP_5	GO:0048488~synaptic vesicle endocytosis	4	0.00199979	ENSMUSG00000034799, ENSMUSG00000022973, ENSMUSG00000021314, ENSMUSG00000026797	15.0947	3.08113	0.0308113
GOTERM_BP_5	GO:0048667~cell morphogenesis involved in neuron differentiation	12	0.00228561	ENSMUSG00000020598, ENSMUSG00000027797, ENSMUSG00000037032, ENSMUSG00000026442, ENSMUSG00000005871, ENSMUSG00000038970, ENSMUSG00000069601, ENSMUSG00000026797, ENSMUSG00000029512, ENSMUSG00000022607, ENSMUSG00000026131, ENSMUSG00000028832	2.98577	3.51416	0.0351416
GOTERM_BP_5	GO:0009144~purine nucleoside triphosphate metabolic process	9	0.00232507	ENSMUSG00000026576, ENSMUSG00000020857, ENSMUSG00000037601, ENSMUSG00000019302, ENSMUSG00000040907, ENSMUSG00000006273, ENSMUSG00000025781, ENSMUSG00000000563, ENSMUSG00000007097	3.84488	3.57381	0.0357381
GOTERM_BP_5	GO:0051969~regulation of transmission of nerve impulse	9	0.00246623	ENSMUSG00000037996, ENSMUSG00000041670, ENSMUSG00000055254, ENSMUSG00000028161, ENSMUSG00000033981, ENSMUSG00000049583, ENSMUSG00000051790, ENSMUSG00000026797, ENSMUSG00000024617	3.80895	3.78689	0.0378689
GOTERM_BP_5	GO:0032990~cell part morphogenesis	13	0.00253292	ENSMUSG00000020598, ENSMUSG00000027797, ENSMUSG00000037032, ENSMUSG00000026442, ENSMUSG00000005871, ENSMUSG00000038970, ENSMUSG00000069601, ENSMUSG00000033282, ENSMUSG00000026797, ENSMUSG00000029512, ENSMUSG00000022607, ENSMUSG00000026131, ENSMUSG00000028832	2.77686	3.8874	0.038874
GOTERM_BP_5	GO:0030163~protein catabolic process	24	0.0027327	ENSMUSG00000064061, ENSMUSG00000042211, ENSMUSG00000005371, ENSMUSG00000002102, ENSMUSG00000031154, ENSMUSG00000022443, ENSMUSG00000015671, ENSMUSG00000047879, ENSMUSG00000030816, ENSMUSG00000027363, ENSMUSG00000028086, ENSMUSG00000030451, ENSMUSG00000074781, ENSMUSG00000004364, ENSMUSG00000036712, ENSMUSG00000031095, ENSMUSG00000047539, ENSMUSG00000039100, ENSMUSG00000033545, ENSMUSG00000017843,…	1.95471	4.18791	0.0418791
GOTERM_BP_5	GO:0006887~exocytosis	9	0.00293035	ENSMUSG00000020894, ENSMUSG00000021071, ENSMUSG00000034799, ENSMUSG00000041670, ENSMUSG00000022973, ENSMUSG00000021687, ENSMUSG00000019906, ENSMUSG00000026797, ENSMUSG00000049044	3.70507	4.48436	0.0448436
GOTERM_BP_5	GO:0006897~endocytosis	12	0.0029368	ENSMUSG00000037601, ENSMUSG00000040249, ENSMUSG00000034799, ENSMUSG00000022973, ENSMUSG00000031731, ENSMUSG00000055447, ENSMUSG00000021314, ENSMUSG00000040990, ENSMUSG00000033981, ENSMUSG00000026825, ENSMUSG00000026797, ENSMUSG00000029512	2.89048	4.49402	0.0449402
GOTERM_BP_5	GO:0009260~ribonucleotide biosynthetic process	9	0.0030993	ENSMUSG00000026576, ENSMUSG00000020857, ENSMUSG00000037601, ENSMUSG00000019302, ENSMUSG00000040907, ENSMUSG00000006273, ENSMUSG00000025781, ENSMUSG00000000563, ENSMUSG00000007097	3.67169	4.73709	0.0473709
GOTERM_BP_5	GO:0031644~regulation of neurological system process	9	0.0034599	ENSMUSG00000037996, ENSMUSG00000041670, ENSMUSG00000055254, ENSMUSG00000028161, ENSMUSG00000033981, ENSMUSG00000049583, ENSMUSG00000051790, ENSMUSG00000026797, ENSMUSG00000024617	3.6067	5.27437	0.0527437
GOTERM_BP_5	GO:0044257~cellular protein catabolic process	23	0.00377954	ENSMUSG00000064061, ENSMUSG00000042211, ENSMUSG00000005371, ENSMUSG00000031154, ENSMUSG00000022443, ENSMUSG00000015671, ENSMUSG00000047879, ENSMUSG00000030816, ENSMUSG00000027363, ENSMUSG00000028086, ENSMUSG00000030451, ENSMUSG00000074781, ENSMUSG00000004364, ENSMUSG00000036712, ENSMUSG00000031095, ENSMUSG00000047539, ENSMUSG00000039100, ENSMUSG00000033545, ENSMUSG00000017843, ENSMUSG00000011256,…	1.93954	5.74828	0.0574828
GOTERM_BP_5	GO:0051056~regulation of small GTPase mediated signal transduction	13	0.0045579	ENSMUSG00000031442, ENSMUSG00000041992, ENSMUSG00000037126, ENSMUSG00000017631, ENSMUSG00000042700, ENSMUSG00000024096, ENSMUSG00000025422, ENSMUSG00000025555, ENSMUSG00000027255, ENSMUSG00000021895, ENSMUSG00000041977, ENSMUSG00000042492, ENSMUSG00000049044	2.58199	6.893	0.06893
GOTERM_BP_5	GO:0007264~small GTPase mediated signal transduction	14	0.0046301	ENSMUSG00000031442, ENSMUSG00000041992, ENSMUSG00000041444, ENSMUSG00000035133, ENSMUSG00000027363, ENSMUSG00000029512, ENSMUSG00000024096, ENSMUSG00000025422, ENSMUSG00000077450, ENSMUSG00000015087, ENSMUSG00000049866, ENSMUSG00000049044, ENSMUSG00000004771, ENSMUSG00000028945	2.45728	6.99853	0.0699853
GOTERM_BP_5	GO:0009150~purine ribonucleotide metabolic process	9	0.00473929	ENSMUSG00000026576, ENSMUSG00000020857, ENSMUSG00000037601, ENSMUSG00000019302, ENSMUSG00000040907, ENSMUSG00000006273, ENSMUSG00000025781, ENSMUSG00000000563, ENSMUSG00000007097	3.42485	7.1579	0.071579
GOTERM_BP_5	GO:0050821~protein stabilization	4	0.00476962	ENSMUSG00000027002, ENSMUSG00000041879, ENSMUSG00000037032, ENSMUSG00000026797	11.321	7.20212	0.0720212
GOTERM_CC_5	GO:0005737~cytoplasm	200	6.83909e-09	ENSMUSG00000043940, ENSMUSG00000064138, ENSMUSG00000018707, ENSMUSG00000054728, ENSMUSG00000032503, ENSMUSG00000019370, ENSMUSG00000029581, ENSMUSG00000027255, ENSMUSG00000009394, ENSMUSG00000073422, ENSMUSG00000001525, ENSMUSG00000027500, ENSMUSG00000020402, ENSMUSG00000025781, ENSMUSG00000024359, ENSMUSG00000041879, ENSMUSG00000077450, ENSMUSG00000031799, ENSMUSG00000027248, ENSMUSG00000041977,…	1.3474	8.91231e-06	8.91231e-08
GOTERM_CC_5	GO:0030054~cell junction	32	1.22677e-07	ENSMUSG00000034799, ENSMUSG00000001986, ENSMUSG00000041670, ENSMUSG00000007617, ENSMUSG00000041444, ENSMUSG00000041268, ENSMUSG00000025892, ENSMUSG00000054728, ENSMUSG00000024617, ENSMUSG00000051375, ENSMUSG00000009394, ENSMUSG00000005871, ENSMUSG00000033545, ENSMUSG00000021314, ENSMUSG00000019906, ENSMUSG00000027273, ENSMUSG00000030337, ENSMUSG00000022607, ENSMUSG00000026131, ENSMUSG00000022443,…	2.9668	0.000159866	1.59866e-06
GOTERM_CC_5	GO:0005624~membrane fraction	31	2.17798e-06	ENSMUSG00000053825, ENSMUSG00000021071, ENSMUSG00000001986, ENSMUSG00000020333, ENSMUSG00000007617, ENSMUSG00000047879, ENSMUSG00000029512, ENSMUSG00000007440, ENSMUSG00000037601, ENSMUSG00000037996, ENSMUSG00000019906, ENSMUSG00000027273, ENSMUSG00000030337, ENSMUSG00000015766, ENSMUSG00000008892, ENSMUSG00000078919, ENSMUSG00000073422, ENSMUSG00000040249, ENSMUSG00000030806, ENSMUSG00000032966,…	2.64867	0.00283818	2.83818e-05
GOTERM_CC_5	GO:0043232~intracellular non-membrane-bounded organelle	74	5.9141e-06	ENSMUSG00000059248, ENSMUSG00000001986, ENSMUSG00000079470, ENSMUSG00000018474, ENSMUSG00000007617, ENSMUSG00000000740, ENSMUSG00000043535, ENSMUSG00000018707, ENSMUSG00000049775, ENSMUSG00000019370, ENSMUSG00000021076, ENSMUSG00000026127, ENSMUSG00000025555, ENSMUSG00000021314, ENSMUSG00000031605, ENSMUSG00000021767, ENSMUSG00000015766, ENSMUSG00000021595, ENSMUSG00000022607, ENSMUSG00000025290,…	1.68033	0.00770664	7.70664e-05
GOTERM_CC_5	GO:0044446~intracellular organelle part	107	1.43442e-05	ENSMUSG00000059248, ENSMUSG00000001986, ENSMUSG00000043940, ENSMUSG00000018707, ENSMUSG00000027193, ENSMUSG00000049775, ENSMUSG00000029512, ENSMUSG00000030451, ENSMUSG00000019370, ENSMUSG00000021076, ENSMUSG00000026127, ENSMUSG00000009394, ENSMUSG00000021595, ENSMUSG00000015766, ENSMUSG00000073422, ENSMUSG00000042699, ENSMUSG00000025290, ENSMUSG00000001525, ENSMUSG00000022443, ENSMUSG00000020402,…	1.45977	0.0186909	0.000186909
GOTERM_CC_5	GO:0019717~synaptosome	10	1.80798e-05	ENSMUSG00000053825, ENSMUSG00000020894, ENSMUSG00000021071, ENSMUSG00000040003, ENSMUSG00000047879, ENSMUSG00000040990, ENSMUSG00000019906, ENSMUSG00000027273, ENSMUSG00000015766, ENSMUSG00000030337	6.60226	0.023558	0.00023558
GOTERM_CC_5	GO:0044444~cytoplasmic part	131	2.5816e-05	ENSMUSG00000059248, ENSMUSG00000043940, ENSMUSG00000064138, ENSMUSG00000000740, ENSMUSG00000041268, ENSMUSG00000075376, ENSMUSG00000049775, ENSMUSG00000030451, ENSMUSG00000029512, ENSMUSG00000027255, ENSMUSG00000009394, ENSMUSG00000021314, ENSMUSG00000025290, ENSMUSG00000073422, ENSMUSG00000049044, ENSMUSG00000001525, ENSMUSG00000022443, ENSMUSG00000027500, ENSMUSG00000028161, ENSMUSG00000020402,…	1.36432	0.0336367	0.000336367
GOTERM_CC_5	GO:0005856~cytoskeleton	47	7.61556e-05	ENSMUSG00000025228, ENSMUSG00000059248, ENSMUSG00000072825, ENSMUSG00000001986, ENSMUSG00000057335, ENSMUSG00000007617, ENSMUSG00000041444, ENSMUSG00000055407, ENSMUSG00000024991, ENSMUSG00000018707, ENSMUSG00000049775, ENSMUSG00000019370, ENSMUSG00000021076, ENSMUSG00000037601, ENSMUSG00000026341, ENSMUSG00000025555, ENSMUSG00000005871, ENSMUSG00000021314, ENSMUSG00000026825, ENSMUSG00000031605,…	1.82533	0.0991962	0.000991962
GOTERM_CC_5	GO:0043229~intracellular organelle	221	0.00010927	ENSMUSG00000043940, ENSMUSG00000064138, ENSMUSG00000018707, ENSMUSG00000007440, ENSMUSG00000019370, ENSMUSG00000027255, ENSMUSG00000009394, ENSMUSG00000073422, ENSMUSG00000042699, ENSMUSG00000001525, ENSMUSG00000020402, ENSMUSG00000013089, ENSMUSG00000022961, ENSMUSG00000025781, ENSMUSG00000024359, ENSMUSG00000041879, ENSMUSG00000077450, ENSMUSG00000031799, ENSMUSG00000040433, ENSMUSG00000027248,…	1.17641	0.142301	0.00142301
GOTERM_CC_5	GO:0014069~postsynaptic density	8	0.000150014	ENSMUSG00000001986, ENSMUSG00000007617, ENSMUSG00000052572, ENSMUSG00000041444, ENSMUSG00000055254, ENSMUSG00000030102, ENSMUSG00000033981, ENSMUSG00000015766	6.83528	0.195313	0.00195313
GOTERM_CC_5	GO:0019898~extrinsic to membrane	25	0.000226567	ENSMUSG00000034799, ENSMUSG00000025658, ENSMUSG00000041670, ENSMUSG00000043940, ENSMUSG00000041268, ENSMUSG00000002985, ENSMUSG00000027438, ENSMUSG00000025555, ENSMUSG00000006273, ENSMUSG00000033545, ENSMUSG00000019906, ENSMUSG00000049044, ENSMUSG00000045095, ENSMUSG00000040990, ENSMUSG00000035133, ENSMUSG00000035086, ENSMUSG00000030653, ENSMUSG00000024096, ENSMUSG00000022194, ENSMUSG00000031696,…	2.30799	0.294847	0.00294847
GOTERM_CC_5	GO:0005829~cytosol	27	0.000376213	ENSMUSG00000002102, ENSMUSG00000003031, ENSMUSG00000015671, ENSMUSG00000052305, ENSMUSG00000049775, ENSMUSG00000005534, ENSMUSG00000001289, ENSMUSG00000054766, ENSMUSG00000024346, ENSMUSG00000006273, ENSMUSG00000022607, ENSMUSG00000025290, ENSMUSG00000057113, ENSMUSG00000049044, ENSMUSG00000021870, ENSMUSG00000001525, ENSMUSG00000022443, ENSMUSG00000028161, ENSMUSG00000063358, ENSMUSG00000024431,…	2.14303	0.489152	0.00489152
GOTERM_CC_5	GO:0044430~cytoskeletal part	34	0.000423772	ENSMUSG00000059248, ENSMUSG00000025228, ENSMUSG00000072825, ENSMUSG00000001986, ENSMUSG00000057335, ENSMUSG00000007617, ENSMUSG00000041444, ENSMUSG00000055407, ENSMUSG00000018707, ENSMUSG00000024991, ENSMUSG00000019370, ENSMUSG00000021076, ENSMUSG00000037601, ENSMUSG00000005871, ENSMUSG00000026825, ENSMUSG00000031605, ENSMUSG00000015766, ENSMUSG00000057113, ENSMUSG00000021693, ENSMUSG00000021870,…	1.91414	0.55083	0.0055083
GOTERM_CC_5	GO:0016023~cytoplasmic membrane-bounded vesicle	22	0.000570092	ENSMUSG00000027419, ENSMUSG00000019302, ENSMUSG00000007891, ENSMUSG00000041268, ENSMUSG00000033981, ENSMUSG00000035086, ENSMUSG00000049775, ENSMUSG00000029512, ENSMUSG00000032076, ENSMUSG00000020894, ENSMUSG00000032181, ENSMUSG00000077450, ENSMUSG00000009394, ENSMUSG00000006273, ENSMUSG00000031731, ENSMUSG00000021687, ENSMUSG00000021314, ENSMUSG00000020048, ENSMUSG00000027248, ENSMUSG00000063077,…	2.31558	0.740369	0.00740369
GOTERM_CC_5	GO:0031410~cytoplasmic vesicle	25	0.00065409	ENSMUSG00000027419, ENSMUSG00000019302, ENSMUSG00000007891, ENSMUSG00000041268, ENSMUSG00000049775, ENSMUSG00000029512, ENSMUSG00000032181, ENSMUSG00000009394, ENSMUSG00000006273, ENSMUSG00000021687, ENSMUSG00000033545, ENSMUSG00000021314, ENSMUSG00000030337, ENSMUSG00000026131, ENSMUSG00000040990, ENSMUSG00000035086, ENSMUSG00000033981, ENSMUSG00000032076, ENSMUSG00000077450, ENSMUSG00000020894,…	2.14444	0.849026	0.00849026
GOTERM_CC_5	GO:0005802~trans-Golgi network	7	0.000667119	ENSMUSG00000020894, ENSMUSG00000027799, ENSMUSG00000031731, ENSMUSG00000021687, ENSMUSG00000035086, ENSMUSG00000027273, ENSMUSG00000004771	6.48988	0.865871	0.00865871
GOTERM_CC_5	GO:0015630~microtubule cytoskeleton	23	0.000696707	ENSMUSG00000021693, ENSMUSG00000021870, ENSMUSG00000001525, ENSMUSG00000025228, ENSMUSG00000072825, ENSMUSG00000057335, ENSMUSG00000030161, ENSMUSG00000022443, ENSMUSG00000055407, ENSMUSG00000024991, ENSMUSG00000018707, ENSMUSG00000033282, ENSMUSG00000019370, ENSMUSG00000021076, ENSMUSG00000028832, ENSMUSG00000037601, ENSMUSG00000040549, ENSMUSG00000005871, ENSMUSG00000068039, ENSMUSG00000026825,…	2.22716	0.904112	0.00904112
GOTERM_CC_5	GO:0030424~axon	9	0.00315759	ENSMUSG00000032076, ENSMUSG00000025969, ENSMUSG00000020598, ENSMUSG00000062901, ENSMUSG00000026442, ENSMUSG00000027500, ENSMUSG00000005871, ENSMUSG00000055254, ENSMUSG00000069601	3.66518	4.03753	0.0403753
GOTERM_CC_5	GO:0044459~plasma membrane part	54	0.00535216	ENSMUSG00000031442, ENSMUSG00000016346, ENSMUSG00000001986, ENSMUSG00000007617, ENSMUSG00000041670, ENSMUSG00000043940, ENSMUSG00000041268, ENSMUSG00000025892, ENSMUSG00000054728, ENSMUSG00000026576, ENSMUSG00000027255, ENSMUSG00000051375, ENSMUSG00000009394, ENSMUSG00000033545, ENSMUSG00000021314, ENSMUSG00000015766, ENSMUSG00000022607, ENSMUSG00000028945, ENSMUSG00000027002, ENSMUSG00000040249,…	1.44093	6.75442	0.0675442
GOTERM_CC_5	GO:0030135~coated vesicle	9	0.00765325	ENSMUSG00000032076, ENSMUSG00000020894, ENSMUSG00000009394, ENSMUSG00000031731, ENSMUSG00000021687, ENSMUSG00000041268, ENSMUSG00000021314, ENSMUSG00000033981, ENSMUSG00000068923	3.1627	9.52679	0.0952679
GOTERM_MF_5	GO:0032559~adenyl ribonucleotide binding	58	1.07759e-06	ENSMUSG00000032294, ENSMUSG00000020032, ENSMUSG00000020333, ENSMUSG00000002102, ENSMUSG00000030357, ENSMUSG00000018474, ENSMUSG00000043535, ENSMUSG00000029471, ENSMUSG00000018707, ENSMUSG00000029512, ENSMUSG00000022884, ENSMUSG00000032604, ENSMUSG00000000787, ENSMUSG00000004865, ENSMUSG00000009394, ENSMUSG00000052293, ENSMUSG00000022607, ENSMUSG00000042699, ENSMUSG00000049044, ENSMUSG00000003234,…	1.89757	0.00121337	1.21337e-05
GOTERM_MF_5	GO:0008066~glutamate receptor activity	5	0.0077706	ENSMUSG00000001986, ENSMUSG00000033981, ENSMUSG00000025892, ENSMUSG00000049583, ENSMUSG00000055553	6.28505	8.40914	0.0840914

## Sheet: GF-SI
Category	Term	Count	PValue	Genes	Fold Enrichment	FDR [%]	FDR faction
KEGG_PATHWAY	mmu03040:Spliceosome	65	1.90446e-16	ENSMUSG00000029817, ENSMUSG00000024422, ENSMUSG00000030216, ENSMUSG00000040383, ENSMUSG00000039630, ENSMUSG00000031157, ENSMUSG00000074088, ENSMUSG00000015656, ENSMUSG00000028676, ENSMUSG00000040824, ENSMUSG00000031683, ENSMUSG00000023932, ENSMUSG00000032407, ENSMUSG00000059208, ENSMUSG00000059005, ENSMUSG00000037475, ENSMUSG00000033732, ENSMUSG00000005687, ENSMUSG00000021039, ENSMUSG00000020180,…	2.73438	2.77556e-13	2.77556e-15
KEGG_PATHWAY	mmu04144:Endocytosis	81	5.3183e-12	ENSMUSG00000023353, ENSMUSG00000007613, ENSMUSG00000025793, ENSMUSG00000020375, ENSMUSG00000037098, ENSMUSG00000015656, ENSMUSG00000019173, ENSMUSG00000032870, ENSMUSG00000028488, ENSMUSG00000027255, ENSMUSG00000032216, ENSMUSG00000022841, ENSMUSG00000022789, ENSMUSG00000037999, ENSMUSG00000026155, ENSMUSG00000029648, ENSMUSG00000040797, ENSMUSG00000000743, ENSMUSG00000035203, ENSMUSG00000027519,…	2.09171	6.56289e-09	6.56289e-11
KEGG_PATHWAY	mmu04720:Long-term potentiation	36	4.95561e-09	ENSMUSG00000000441, ENSMUSG00000055024, ENSMUSG00000019370, ENSMUSG00000001127, ENSMUSG00000002413, ENSMUSG00000020431, ENSMUSG00000024617, ENSMUSG00000033953, ENSMUSG00000024639, ENSMUSG00000039943, ENSMUSG00000059003, ENSMUSG00000036438, ENSMUSG00000021820, ENSMUSG00000022521, ENSMUSG00000052889, ENSMUSG00000042406, ENSMUSG00000051177, ENSMUSG00000057897, ENSMUSG00000001175, ENSMUSG00000053819,…	2.6827	6.11533e-06	6.11533e-08
KEGG_PATHWAY	mmu05016:Huntington's disease	66	8.97838e-08	ENSMUSG00000037916, ENSMUSG00000005510, ENSMUSG00000025968, ENSMUSG00000025204, ENSMUSG00000058076, ENSMUSG00000019777, ENSMUSG00000020886, ENSMUSG00000024639, ENSMUSG00000002416, ENSMUSG00000039943, ENSMUSG00000022841, ENSMUSG00000033020, ENSMUSG00000030884, ENSMUSG00000051177, ENSMUSG00000004667, ENSMUSG00000024099, ENSMUSG00000035152, ENSMUSG00000042523, ENSMUSG00000003923, ENSMUSG00000006930,…	1.88131	0.000110795	1.10795e-06
KEGG_PATHWAY	mmu04012:ErbB signaling pathway	39	1.14989e-07	ENSMUSG00000000441, ENSMUSG00000031284, ENSMUSG00000001127, ENSMUSG00000002413, ENSMUSG00000024617, ENSMUSG00000028698, ENSMUSG00000001729, ENSMUSG00000074923, ENSMUSG00000020516, ENSMUSG00000021820, ENSMUSG00000026596, ENSMUSG00000033352, ENSMUSG00000052889, ENSMUSG00000020312, ENSMUSG00000004056, ENSMUSG00000022607, ENSMUSG00000034342, ENSMUSG00000057897, ENSMUSG00000028991, ENSMUSG00000002948,…	2.33837	0.000141899	1.41899e-06
KEGG_PATHWAY	mmu04120:Ubiquitin mediated proteolysis	53	1.22635e-07	ENSMUSG00000032307, ENSMUSG00000027011, ENSMUSG00000038965, ENSMUSG00000029176, ENSMUSG00000029472, ENSMUSG00000030451, ENSMUSG00000051234, ENSMUSG00000004364, ENSMUSG00000009293, ENSMUSG00000032216, ENSMUSG00000032405, ENSMUSG00000029686, ENSMUSG00000034342, ENSMUSG00000035048, ENSMUSG00000020687, ENSMUSG00000038664, ENSMUSG00000025217, ENSMUSG00000036309, ENSMUSG00000022771, ENSMUSG00000026219,…	2.03285	0.000151334	1.51334e-06
KEGG_PATHWAY	mmu03010:Ribosome	39	2.36829e-07	ENSMUSG00000032399, ENSMUSG00000060036, ENSMUSG00000025794, ENSMUSG00000071415, ENSMUSG00000058558, ENSMUSG00000061787, ENSMUSG00000062997, ENSMUSG00000037563, ENSMUSG00000059291, ENSMUSG00000043716, ENSMUSG00000032215, ENSMUSG00000008348, ENSMUSG00000019505, ENSMUSG00000060938, ENSMUSG00000067274, ENSMUSG00000018362, ENSMUSG00000022601, ENSMUSG00000058600, ENSMUSG00000025290, ENSMUSG00000012405,…	2.28582	0.000292252	2.92252e-06
KEGG_PATHWAY	mmu05214:Glioma	31	3.88184e-07	ENSMUSG00000000441, ENSMUSG00000070348, ENSMUSG00000019370, ENSMUSG00000001127, ENSMUSG00000002413, ENSMUSG00000024617, ENSMUSG00000005533, ENSMUSG00000028698, ENSMUSG00000001729, ENSMUSG00000022105, ENSMUSG00000036438, ENSMUSG00000021820, ENSMUSG00000052889, ENSMUSG00000020312, ENSMUSG00000004056, ENSMUSG00000025856, ENSMUSG00000057897, ENSMUSG00000028991, ENSMUSG00000001175, ENSMUSG00000053819,…	2.52668	0.000479027	4.79027e-06
KEGG_PATHWAY	mmu04910:Insulin signaling pathway	51	1.44093e-06	ENSMUSG00000000441, ENSMUSG00000026254, ENSMUSG00000025855, ENSMUSG00000032601, ENSMUSG00000001127, ENSMUSG00000019370, ENSMUSG00000002413, ENSMUSG00000020538, ENSMUSG00000039844, ENSMUSG00000036438, ENSMUSG00000020532, ENSMUSG00000002496, ENSMUSG00000028944, ENSMUSG00000034342, ENSMUSG00000028945, ENSMUSG00000001175, ENSMUSG00000030265, ENSMUSG00000063358, ENSMUSG00000025153, ENSMUSG00000005034,…	1.92779	0.00177812	1.77812e-05
KEGG_PATHWAY	mmu05223:Non-small cell lung cancer	26	4.8148e-06	ENSMUSG00000000441, ENSMUSG00000070348, ENSMUSG00000048756, ENSMUSG00000039656, ENSMUSG00000018209, ENSMUSG00000001127, ENSMUSG00000002413, ENSMUSG00000028698, ENSMUSG00000001729, ENSMUSG00000022105, ENSMUSG00000015846, ENSMUSG00000052889, ENSMUSG00000004056, ENSMUSG00000030265, ENSMUSG00000027665, ENSMUSG00000004936, ENSMUSG00000063358, ENSMUSG00000019699, ENSMUSG00000059923, ENSMUSG00000041417,…	2.51158	0.00594141	5.94141e-05
KEGG_PATHWAY	mmu04914:Progesterone-mediated oocyte maturation	35	5.99768e-06	ENSMUSG00000000441, ENSMUSG00000029176, ENSMUSG00000053137, ENSMUSG00000029472, ENSMUSG00000032562, ENSMUSG00000001127, ENSMUSG00000002413, ENSMUSG00000020431, ENSMUSG00000005533, ENSMUSG00000028698, ENSMUSG00000001729, ENSMUSG00000022994, ENSMUSG00000022840, ENSMUSG00000004056, ENSMUSG00000014355, ENSMUSG00000005580, ENSMUSG00000020654, ENSMUSG00000035048, ENSMUSG00000020687, ENSMUSG00000024370,…	2.14791	0.00740101	7.40101e-05
KEGG_PATHWAY	mmu04070:Phosphatidylinositol signaling system	32	6.92955e-06	ENSMUSG00000025949, ENSMUSG00000036095, ENSMUSG00000029330, ENSMUSG00000026737, ENSMUSG00000022861, ENSMUSG00000041720, ENSMUSG00000019370, ENSMUSG00000028698, ENSMUSG00000039943, ENSMUSG00000036438, ENSMUSG00000022973, ENSMUSG00000052889, ENSMUSG00000058793, ENSMUSG00000051177, ENSMUSG00000000276, ENSMUSG00000004815, ENSMUSG00000001175, ENSMUSG00000038665, ENSMUSG00000034731, ENSMUSG00000027665,…	2.22565	0.00855087	8.55087e-05
KEGG_PATHWAY	mmu05220:Chronic myeloid leukemia	32	9.59375e-06	ENSMUSG00000000441, ENSMUSG00000007613, ENSMUSG00000009681, ENSMUSG00000070348, ENSMUSG00000019777, ENSMUSG00000001127, ENSMUSG00000002413, ENSMUSG00000028698, ENSMUSG00000001729, ENSMUSG00000043733, ENSMUSG00000022105, ENSMUSG00000020312, ENSMUSG00000004056, ENSMUSG00000025199, ENSMUSG00000034342, ENSMUSG00000030970, ENSMUSG00000004508, ENSMUSG00000030265, ENSMUSG00000027665, ENSMUSG00000004936,…	2.19636	0.0118382	0.000118382
KEGG_PATHWAY	mmu05211:Renal cell carcinoma	30	1.29583e-05	ENSMUSG00000000441, ENSMUSG00000055024, ENSMUSG00000031284, ENSMUSG00000001127, ENSMUSG00000002413, ENSMUSG00000028698, ENSMUSG00000001729, ENSMUSG00000074923, ENSMUSG00000015709, ENSMUSG00000043733, ENSMUSG00000023951, ENSMUSG00000039844, ENSMUSG00000022521, ENSMUSG00000025856, ENSMUSG00000004056, ENSMUSG00000032633, ENSMUSG00000030265, ENSMUSG00000027665, ENSMUSG00000063358, ENSMUSG00000019699,…	2.23558	0.0159896	0.000159896
KEGG_PATHWAY	mmu04010:MAPK signaling pathway	79	2.35946e-05	ENSMUSG00000000441, ENSMUSG00000007613, ENSMUSG00000027347, ENSMUSG00000053137, ENSMUSG00000018209, ENSMUSG00000015656, ENSMUSG00000042826, ENSMUSG00000002413, ENSMUSG00000025408, ENSMUSG00000017412, ENSMUSG00000025551, ENSMUSG00000052889, ENSMUSG00000005583, ENSMUSG00000025856, ENSMUSG00000025199, ENSMUSG00000017291, ENSMUSG00000042406, ENSMUSG00000002948, ENSMUSG00000053395, ENSMUSG00000060216,…	1.55507	0.0291124	0.000291124
KEGG_PATHWAY	mmu05212:Pancreatic cancer	30	2.46699e-05	ENSMUSG00000000441, ENSMUSG00000024563, ENSMUSG00000007613, ENSMUSG00000070348, ENSMUSG00000028530, ENSMUSG00000026821, ENSMUSG00000001127, ENSMUSG00000004451, ENSMUSG00000002413, ENSMUSG00000028698, ENSMUSG00000001729, ENSMUSG00000023951, ENSMUSG00000022105, ENSMUSG00000004056, ENSMUSG00000025199, ENSMUSG00000030265, ENSMUSG00000027665, ENSMUSG00000046709, ENSMUSG00000004936, ENSMUSG00000063358,…	2.17348	0.0304389	0.000304389
KEGG_PATHWAY	mmu05213:Endometrial cancer	24	2.90134e-05	ENSMUSG00000000441, ENSMUSG00000006932, ENSMUSG00000048756, ENSMUSG00000070348, ENSMUSG00000030265, ENSMUSG00000030890, ENSMUSG00000027665, ENSMUSG00000004936, ENSMUSG00000019699, ENSMUSG00000063358, ENSMUSG00000041417, ENSMUSG00000059923, ENSMUSG00000027852, ENSMUSG00000001127, ENSMUSG00000002413, ENSMUSG00000028698, ENSMUSG00000001729, ENSMUSG00000031834, ENSMUSG00000005871, ENSMUSG00000063063,…	2.40755	0.0357973	0.000357973
KEGG_PATHWAY	mmu04722:Neurotrophin signaling pathway	45	4.37773e-05	ENSMUSG00000000441, ENSMUSG00000048756, ENSMUSG00000053137, ENSMUSG00000059146, ENSMUSG00000036333, ENSMUSG00000019370, ENSMUSG00000002413, ENSMUSG00000071369, ENSMUSG00000028698, ENSMUSG00000024617, ENSMUSG00000001729, ENSMUSG00000043733, ENSMUSG00000036438, ENSMUSG00000039844, ENSMUSG00000021820, ENSMUSG00000020312, ENSMUSG00000004056, ENSMUSG00000042406, ENSMUSG00000057897, ENSMUSG00000001175,…	1.80566	0.0540087	0.000540087
KEGG_PATHWAY	mmu04912:GnRH signaling pathway	36	5.99726e-05	ENSMUSG00000000441, ENSMUSG00000053137, ENSMUSG00000034781, ENSMUSG00000019370, ENSMUSG00000020431, ENSMUSG00000024617, ENSMUSG00000024639, ENSMUSG00000039943, ENSMUSG00000022994, ENSMUSG00000036438, ENSMUSG00000022840, ENSMUSG00000021820, ENSMUSG00000033352, ENSMUSG00000052889, ENSMUSG00000042406, ENSMUSG00000005580, ENSMUSG00000059456, ENSMUSG00000020654, ENSMUSG00000051177, ENSMUSG00000057897,…	1.93597	0.0739822	0.000739822
KEGG_PATHWAY	mmu04540:Gap junction	33	6.20774e-05	ENSMUSG00000000441, ENSMUSG00000023004, ENSMUSG00000034781, ENSMUSG00000045136, ENSMUSG00000032562, ENSMUSG00000020431, ENSMUSG00000024639, ENSMUSG00000039943, ENSMUSG00000022994, ENSMUSG00000022840, ENSMUSG00000052889, ENSMUSG00000026202, ENSMUSG00000025856, ENSMUSG00000062380, ENSMUSG00000005580, ENSMUSG00000020654, ENSMUSG00000051177, ENSMUSG00000001525, ENSMUSG00000027523, ENSMUSG00000072235,…	2.00163	0.0765779	0.000765779
KEGG_PATHWAY	mmu00190:Oxidative phosphorylation	44	9.80011e-05	ENSMUSG00000037916, ENSMUSG00000005510, ENSMUSG00000025968, ENSMUSG00000063882, ENSMUSG00000019302, ENSMUSG00000024403, ENSMUSG00000019210, ENSMUSG00000039347, ENSMUSG00000050856, ENSMUSG00000058076, ENSMUSG00000025204, ENSMUSG00000027673, ENSMUSG00000004285, ENSMUSG00000021606, ENSMUSG00000000563, ENSMUSG00000064341, ENSMUSG00000002416, ENSMUSG00000019087, ENSMUSG00000038023, ENSMUSG00000014313,…	1.76554	0.120868	0.00120868
KEGG_PATHWAY	mmu04114:Oocyte meiosis	40	0.000112054	ENSMUSG00000029176, ENSMUSG00000025060, ENSMUSG00000029472, ENSMUSG00000041133, ENSMUSG00000019370, ENSMUSG00000020431, ENSMUSG00000024617, ENSMUSG00000005533, ENSMUSG00000033953, ENSMUSG00000022994, ENSMUSG00000036438, ENSMUSG00000022840, ENSMUSG00000021820, ENSMUSG00000024777, ENSMUSG00000017843, ENSMUSG00000029686, ENSMUSG00000014355, ENSMUSG00000005580, ENSMUSG00000020654, ENSMUSG00000057897,…	1.81439	0.13819	0.0013819
KEGG_PATHWAY	mmu05215:Prostate cancer	33	0.00016909	ENSMUSG00000000441, ENSMUSG00000070348, ENSMUSG00000055024, ENSMUSG00000001127, ENSMUSG00000002413, ENSMUSG00000005533, ENSMUSG00000028698, ENSMUSG00000001729, ENSMUSG00000022105, ENSMUSG00000022521, ENSMUSG00000031565, ENSMUSG00000025856, ENSMUSG00000004056, ENSMUSG00000025199, ENSMUSG00000042406, ENSMUSG00000028991, ENSMUSG00000006932, ENSMUSG00000025958, ENSMUSG00000030265, ENSMUSG00000027665,…	1.91267	0.20846	0.0020846
KEGG_PATHWAY	mmu04062:Chemokine signaling pathway	56	0.000178902	ENSMUSG00000000441, ENSMUSG00000048756, ENSMUSG00000020431, ENSMUSG00000002413, ENSMUSG00000029713, ENSMUSG00000039943, ENSMUSG00000040033, ENSMUSG00000022994, ENSMUSG00000041112, ENSMUSG00000022840, ENSMUSG00000052889, ENSMUSG00000029684, ENSMUSG00000025199, ENSMUSG00000022607, ENSMUSG00000005580, ENSMUSG00000051177, ENSMUSG00000060216, ENSMUSG00000024789, ENSMUSG00000030265, ENSMUSG00000063358,…	1.60503	0.220545	0.00220545
KEGG_PATHWAY	mmu04666:Fc gamma R-mediated phagocytosis	35	0.000184999	ENSMUSG00000000441, ENSMUSG00000079426, ENSMUSG00000025949, ENSMUSG00000028517, ENSMUSG00000028698, ENSMUSG00000001729, ENSMUSG00000020516, ENSMUSG00000022789, ENSMUSG00000052889, ENSMUSG00000029684, ENSMUSG00000021314, ENSMUSG00000026825, ENSMUSG00000004056, ENSMUSG00000004508, ENSMUSG00000006304, ENSMUSG00000027665, ENSMUSG00000063358, ENSMUSG00000019699, ENSMUSG00000004936, ENSMUSG00000041417,…	1.86299	0.228053	0.00228053
KEGG_PATHWAY	mmu05216:Thyroid cancer	15	0.000356688	ENSMUSG00000006932, ENSMUSG00000070348, ENSMUSG00000039656, ENSMUSG00000030265, ENSMUSG00000004936, ENSMUSG00000063358, ENSMUSG00000027852, ENSMUSG00000002413, ENSMUSG00000027940, ENSMUSG00000015846, ENSMUSG00000006005, ENSMUSG00000056234, ENSMUSG00000022757, ENSMUSG00000025499, ENSMUSG00000048701	2.69812	0.439271	0.00439271
KEGG_PATHWAY	mmu05221:Acute myeloid leukemia	23	0.000474965	ENSMUSG00000000441, ENSMUSG00000028991, ENSMUSG00000070348, ENSMUSG00000030265, ENSMUSG00000027665, ENSMUSG00000004936, ENSMUSG00000019699, ENSMUSG00000063358, ENSMUSG00000041417, ENSMUSG00000059923, ENSMUSG00000031537, ENSMUSG00000027852, ENSMUSG00000001127, ENSMUSG00000002413, ENSMUSG00000005672, ENSMUSG00000028698, ENSMUSG00000001729, ENSMUSG00000031834, ENSMUSG00000020516, ENSMUSG00000004040,…	2.10485	0.584541	0.00584541
KEGG_PATHWAY	mmu05010:Alzheimer's disease	54	0.000634	ENSMUSG00000037916, ENSMUSG00000005510, ENSMUSG00000025968, ENSMUSG00000025204, ENSMUSG00000058076, ENSMUSG00000019370, ENSMUSG00000024639, ENSMUSG00000002416, ENSMUSG00000039943, ENSMUSG00000059003, ENSMUSG00000036438, ENSMUSG00000030884, ENSMUSG00000057666, ENSMUSG00000051177, ENSMUSG00000024099, ENSMUSG00000040249, ENSMUSG00000001175, ENSMUSG00000029467, ENSMUSG00000063358, ENSMUSG00000025781,…	1.54771	0.779563	0.00779563
KEGG_PATHWAY	mmu05012:Parkinson's disease	42	0.000745713	ENSMUSG00000037916, ENSMUSG00000005510, ENSMUSG00000025968, ENSMUSG00000063882, ENSMUSG00000036273, ENSMUSG00000038965, ENSMUSG00000028964, ENSMUSG00000058076, ENSMUSG00000025204, ENSMUSG00000027673, ENSMUSG00000001924, ENSMUSG00000021606, ENSMUSG00000000563, ENSMUSG00000064341, ENSMUSG00000002416, ENSMUSG00000008348, ENSMUSG00000019505, ENSMUSG00000009293, ENSMUSG00000014313, ENSMUSG00000025428,…	1.64727	0.916344	0.00916344
KEGG_PATHWAY	mmu04810:Regulation of actin cytoskeleton	61	0.00121791	ENSMUSG00000000441, ENSMUSG00000030739, ENSMUSG00000026737, ENSMUSG00000042826, ENSMUSG00000001127, ENSMUSG00000002413, ENSMUSG00000029580, ENSMUSG00000022995, ENSMUSG00000021823, ENSMUSG00000025551, ENSMUSG00000026193, ENSMUSG00000029684, ENSMUSG00000025856, ENSMUSG00000022607, ENSMUSG00000027002, ENSMUSG00000031511, ENSMUSG00000022443, ENSMUSG00000020340, ENSMUSG00000030265, ENSMUSG00000026782,…	1.46635	1.49259	0.0149259
KEGG_PATHWAY	mmu04520:Adherens junction	27	0.00130212	ENSMUSG00000024563, ENSMUSG00000033060, ENSMUSG00000007613, ENSMUSG00000055024, ENSMUSG00000005534, ENSMUSG00000034101, ENSMUSG00000005533, ENSMUSG00000024387, ENSMUSG00000029580, ENSMUSG00000021823, ENSMUSG00000022521, ENSMUSG00000031565, ENSMUSG00000029684, ENSMUSG00000063063, ENSMUSG00000044573, ENSMUSG00000025314, ENSMUSG00000006932, ENSMUSG00000019843, ENSMUSG00000063358, ENSMUSG00000027646,…	1.85318	1.59504	0.0159504
KEGG_PATHWAY	mmu04916:Melanogenesis	33	0.00139181	ENSMUSG00000000441, ENSMUSG00000055024, ENSMUSG00000022122, ENSMUSG00000032562, ENSMUSG00000019370, ENSMUSG00000020431, ENSMUSG00000024617, ENSMUSG00000005672, ENSMUSG00000024639, ENSMUSG00000039943, ENSMUSG00000022994, ENSMUSG00000036438, ENSMUSG00000022840, ENSMUSG00000021820, ENSMUSG00000031748, ENSMUSG00000022521, ENSMUSG00000052889, ENSMUSG00000005580, ENSMUSG00000020654, ENSMUSG00000051177,…	1.7214	1.70403	0.0170403
KEGG_PATHWAY	mmu04150:mTOR signaling pathway	21	0.0015478	ENSMUSG00000028991, ENSMUSG00000026254, ENSMUSG00000027665, ENSMUSG00000069631, ENSMUSG00000019699, ENSMUSG00000063358, ENSMUSG00000041417, ENSMUSG00000002413, ENSMUSG00000028698, ENSMUSG00000001729, ENSMUSG00000031309, ENSMUSG00000031834, ENSMUSG00000023951, ENSMUSG00000036707, ENSMUSG00000020516, ENSMUSG00000024122, ENSMUSG00000004798, ENSMUSG00000004056, ENSMUSG00000002496, ENSMUSG00000058655,…	2.02859	1.89335	0.0189335
KEGG_PATHWAY	mmu04510:Focal adhesion	56	0.00171205	ENSMUSG00000000441, ENSMUSG00000031502, ENSMUSG00000017344, ENSMUSG00000002413, ENSMUSG00000029580, ENSMUSG00000021823, ENSMUSG00000039844, ENSMUSG00000026193, ENSMUSG00000052889, ENSMUSG00000029648, ENSMUSG00000025856, ENSMUSG00000015829, ENSMUSG00000022607, ENSMUSG00000026478, ENSMUSG00000006932, ENSMUSG00000024456, ENSMUSG00000063358, ENSMUSG00000021448, ENSMUSG00000027646, ENSMUSG00000027087,…	1.47534	2.09232	0.0209232
KEGG_PATHWAY	mmu04360:Axon guidance	40	0.0020463	ENSMUSG00000038264, ENSMUSG00000001227, ENSMUSG00000029095, ENSMUSG00000028883, ENSMUSG00000001300, ENSMUSG00000031284, ENSMUSG00000032562, ENSMUSG00000052516, ENSMUSG00000025085, ENSMUSG00000027200, ENSMUSG00000033953, ENSMUSG00000074923, ENSMUSG00000063531, ENSMUSG00000028289, ENSMUSG00000030257, ENSMUSG00000022607, ENSMUSG00000031391, ENSMUSG00000028969, ENSMUSG00000029245, ENSMUSG00000050587,…	1.59278	2.49608	0.0249608
KEGG_PATHWAY	mmu04142:Lysosome	37	0.00220857	ENSMUSG00000019302, ENSMUSG00000020198, ENSMUSG00000021686, ENSMUSG00000007891, ENSMUSG00000063801, ENSMUSG00000047547, ENSMUSG00000026944, ENSMUSG00000035311, ENSMUSG00000004849, ENSMUSG00000019087, ENSMUSG00000020740, ENSMUSG00000021824, ENSMUSG00000038023, ENSMUSG00000021665, ENSMUSG00000007038, ENSMUSG00000033379, ENSMUSG00000033793, ENSMUSG00000009090, ENSMUSG00000024413, ENSMUSG00000025232,…	1.62189	2.69155	0.0269155
KEGG_PATHWAY	mmu00020:Citrate cycle (TCA cycle)	14	0.00288004	ENSMUSG00000021748, ENSMUSG00000022477, ENSMUSG00000021913, ENSMUSG00000020456, ENSMUSG00000020321, ENSMUSG00000058076, ENSMUSG00000052738, ENSMUSG00000061838, ENSMUSG00000025950, ENSMUSG00000020664, ENSMUSG00000031299, ENSMUSG00000020917, ENSMUSG00000022110, ENSMUSG00000027406	2.35578	3.49656	0.0349656
KEGG_PATHWAY	mmu04730:Long-term depression	25	0.0029206	ENSMUSG00000000441, ENSMUSG00000027523, ENSMUSG00000001986, ENSMUSG00000030265, ENSMUSG00000063358, ENSMUSG00000004936, ENSMUSG00000030102, ENSMUSG00000033981, ENSMUSG00000034781, ENSMUSG00000027852, ENSMUSG00000078816, ENSMUSG00000032562, ENSMUSG00000001127, ENSMUSG00000002413, ENSMUSG00000005533, ENSMUSG00000024639, ENSMUSG00000039943, ENSMUSG00000028005, ENSMUSG00000040009, ENSMUSG00000031748,…	1.81124	3.54499	0.0354499
KEGG_PATHWAY	mmu05014:Amyotrophic lateral sclerosis (ALS)	21	0.00325778	ENSMUSG00000005674, ENSMUSG00000053137, ENSMUSG00000033981, ENSMUSG00000063694, ENSMUSG00000027187, ENSMUSG00000030209, ENSMUSG00000033953, ENSMUSG00000071369, ENSMUSG00000022092, ENSMUSG00000063856, ENSMUSG00000022054, ENSMUSG00000059003, ENSMUSG00000034108, ENSMUSG00000026959, ENSMUSG00000007659, ENSMUSG00000021816, ENSMUSG00000026024, ENSMUSG00000014077, ENSMUSG00000029361, ENSMUSG00000017831,…	1.92182	3.94673	0.0394673
KEGG_PATHWAY	mmu04530:Tight junction	40	0.00369013	ENSMUSG00000003411, ENSMUSG00000013076, ENSMUSG00000030739, ENSMUSG00000031012, ENSMUSG00000028906, ENSMUSG00000029763, ENSMUSG00000032562, ENSMUSG00000024387, ENSMUSG00000001729, ENSMUSG00000029580, ENSMUSG00000019978, ENSMUSG00000052889, ENSMUSG00000063063, ENSMUSG00000020315, ENSMUSG00000004056, ENSMUSG00000000159, ENSMUSG00000037643, ENSMUSG00000006932, ENSMUSG00000028402, ENSMUSG00000022443,…	1.54559	4.45962	0.0445962
KEGG_PATHWAY	mmu04310:Wnt signaling pathway	43	0.00432428	ENSMUSG00000024563, ENSMUSG00000053754, ENSMUSG00000070348, ENSMUSG00000025246, ENSMUSG00000055024, ENSMUSG00000034574, ENSMUSG00000027630, ENSMUSG00000024387, ENSMUSG00000024617, ENSMUSG00000033953, ENSMUSG00000039943, ENSMUSG00000021820, ENSMUSG00000022521, ENSMUSG00000005871, ENSMUSG00000052889, ENSMUSG00000017843, ENSMUSG00000024777, ENSMUSG00000029686, ENSMUSG00000051177, ENSMUSG00000057897,…	1.50539	5.20734	0.0520734
KEGG_PATHWAY	mmu00561:Glycerolipid metabolism	18	0.0045301	ENSMUSG00000000276, ENSMUSG00000004815, ENSMUSG00000024978, ENSMUSG00000028692, ENSMUSG00000038665, ENSMUSG00000036095, ENSMUSG00000034731, ENSMUSG00000026687, ENSMUSG00000029916, ENSMUSG00000010025, ENSMUSG00000033174, ENSMUSG00000022861, ENSMUSG00000031545, ENSMUSG00000028517, ENSMUSG00000053644, ENSMUSG00000040479, ENSMUSG00000001211, ENSMUSG00000034254	1.99776	5.44886	0.0544886
KEGG_PATHWAY	mmu04370:VEGF signaling pathway	25	0.00634764	ENSMUSG00000000441, ENSMUSG00000053137, ENSMUSG00000028698, ENSMUSG00000033953, ENSMUSG00000001729, ENSMUSG00000023951, ENSMUSG00000052889, ENSMUSG00000020312, ENSMUSG00000004056, ENSMUSG00000022607, ENSMUSG00000030265, ENSMUSG00000027665, ENSMUSG00000063358, ENSMUSG00000019699, ENSMUSG00000004936, ENSMUSG00000041417, ENSMUSG00000078816, ENSMUSG00000027852, ENSMUSG00000027646, ENSMUSG00000022092,…	1.71591	7.55728	0.0755728
KEGG_PATHWAY	mmu00010:Glycolysis / Gluconeogenesis	23	0.00640554	ENSMUSG00000021748, ENSMUSG00000032294, ENSMUSG00000023456, ENSMUSG00000028692, ENSMUSG00000026687, ENSMUSG00000017390, ENSMUSG00000063229, ENSMUSG00000010025, ENSMUSG00000062070, ENSMUSG00000004267, ENSMUSG00000033065, ENSMUSG00000031299, ENSMUSG00000053644, ENSMUSG00000020277, ENSMUSG00000063524, ENSMUSG00000036427, ENSMUSG00000021196, ENSMUSG00000020664, ENSMUSG00000030246, ENSMUSG00000030695,…	1.76436	7.62372	0.0762372
KEGG_PATHWAY	mmu00620:Pyruvate metabolism	16	0.00662445	ENSMUSG00000021748, ENSMUSG00000032294, ENSMUSG00000020321, ENSMUSG00000063229, ENSMUSG00000026687, ENSMUSG00000010025, ENSMUSG00000032418, ENSMUSG00000031299, ENSMUSG00000053644, ENSMUSG00000061046, ENSMUSG00000024026, ENSMUSG00000030621, ENSMUSG00000020532, ENSMUSG00000020664, ENSMUSG00000030246, ENSMUSG00000032047	2.03565	7.87456	0.0787456
GOTERM_BP_5	GO:0044267~cellular protein metabolic process	647	3.25478e-40	ENSMUSG00000038822, ENSMUSG00000026254, ENSMUSG00000025794, ENSMUSG00000019777, ENSMUSG00000028700, ENSMUSG00000025103, ENSMUSG00000019977, ENSMUSG00000046947, ENSMUSG00000025613, ENSMUSG00000020265, ENSMUSG00000029686, ENSMUSG00000025486, ENSMUSG00000022263, ENSMUSG00000020124, ENSMUSG00000019578, ENSMUSG00000021116, ENSMUSG00000028309, ENSMUSG00000020115, ENSMUSG00000020114, ENSMUSG00000037805,…	1.55211	5.63624e-37	5.63624e-39
GOTERM_BP_5	GO:0015031~protein transport	242	1.21608e-25	ENSMUSG00000000131, ENSMUSG00000025793, ENSMUSG00000020128, ENSMUSG00000039367, ENSMUSG00000036435, ENSMUSG00000042590, ENSMUSG00000027255, ENSMUSG00000025484, ENSMUSG00000061244, ENSMUSG00000027519, ENSMUSG00000019971, ENSMUSG00000021124, ENSMUSG00000051984, ENSMUSG00000021139, ENSMUSG00000030534, ENSMUSG00000024789, ENSMUSG00000007458, ENSMUSG00000025607, ENSMUSG00000025885, ENSMUSG00000041879,…	1.86202	2.10586e-22	2.10586e-24
GOTERM_BP_5	GO:0006464~protein modification process	389	1.20903e-22	ENSMUSG00000038822, ENSMUSG00000019777, ENSMUSG00000028700, ENSMUSG00000046947, ENSMUSG00000020265, ENSMUSG00000025486, ENSMUSG00000022263, ENSMUSG00000021116, ENSMUSG00000020115, ENSMUSG00000020114, ENSMUSG00000027642, ENSMUSG00000027646, ENSMUSG00000006456, ENSMUSG00000019969, ENSMUSG00000027304, ENSMUSG00000020802, ENSMUSG00000027300, ENSMUSG00000019960, ENSMUSG00000027303, ENSMUSG00000016179,…	1.54642	2.09365e-19	2.09365e-21
GOTERM_BP_5	GO:0008380~RNA splicing	102	3.04533e-22	ENSMUSG00000029817, ENSMUSG00000024268, ENSMUSG00000031311, ENSMUSG00000032580, ENSMUSG00000040824, ENSMUSG00000059708, ENSMUSG00000027763, ENSMUSG00000022635, ENSMUSG00000002524, ENSMUSG00000022774, ENSMUSG00000038374, ENSMUSG00000028639, ENSMUSG00000024604, ENSMUSG00000021500, ENSMUSG00000018379, ENSMUSG00000078676, ENSMUSG00000027593, ENSMUSG00000021134, ENSMUSG00000062078, ENSMUSG00000008658,…	2.54187	5.27354e-19	5.27354e-21
GOTERM_BP_5	GO:0006397~mRNA processing	119	1.01911e-20	ENSMUSG00000029817, ENSMUSG00000024268, ENSMUSG00000031311, ENSMUSG00000032580, ENSMUSG00000040824, ENSMUSG00000034820, ENSMUSG00000059708, ENSMUSG00000038611, ENSMUSG00000027763, ENSMUSG00000022635, ENSMUSG00000036698, ENSMUSG00000006651, ENSMUSG00000002524, ENSMUSG00000022774, ENSMUSG00000038374, ENSMUSG00000028639, ENSMUSG00000024604, ENSMUSG00000029227, ENSMUSG00000021500, ENSMUSG00000022194,…	2.27507	1.76477e-17	1.76477e-19
GOTERM_BP_5	GO:0016071~mRNA metabolic process	130	4.31898e-20	ENSMUSG00000029817, ENSMUSG00000024268, ENSMUSG00000031311, ENSMUSG00000032580, ENSMUSG00000040824, ENSMUSG00000034820, ENSMUSG00000059708, ENSMUSG00000038611, ENSMUSG00000027763, ENSMUSG00000022635, ENSMUSG00000036698, ENSMUSG00000006651, ENSMUSG00000002524, ENSMUSG00000022774, ENSMUSG00000038374, ENSMUSG00000028639, ENSMUSG00000024604, ENSMUSG00000029227, ENSMUSG00000022194, ENSMUSG00000021500,…	2.15618	7.47909e-17	7.47909e-19
GOTERM_BP_5	GO:0016568~chromatin modification	108	3.56263e-19	ENSMUSG00000022702, ENSMUSG00000019777, ENSMUSG00000018501, ENSMUSG00000029712, ENSMUSG00000031314, ENSMUSG00000034245, ENSMUSG00000025316, ENSMUSG00000028309, ENSMUSG00000020387, ENSMUSG00000029505, ENSMUSG00000024454, ENSMUSG00000004698, ENSMUSG00000039852, ENSMUSG00000026313, ENSMUSG00000006456, ENSMUSG00000022394, ENSMUSG00000027304, ENSMUSG00000036940, ENSMUSG00000031458, ENSMUSG00000037935,…	2.29224	6.16933e-16	6.16933e-18
GOTERM_BP_5	GO:0016070~RNA metabolic process	221	5.10725e-17	ENSMUSG00000002658, ENSMUSG00000024268, ENSMUSG00000053286, ENSMUSG00000021266, ENSMUSG00000040824, ENSMUSG00000034820, ENSMUSG00000059708, ENSMUSG00000027763, ENSMUSG00000022635, ENSMUSG00000036698, ENSMUSG00000006651, ENSMUSG00000002524, ENSMUSG00000037805, ENSMUSG00000022774, ENSMUSG00000024608, ENSMUSG00000039166, ENSMUSG00000024604, ENSMUSG00000021500, ENSMUSG00000047242, ENSMUSG00000027304,…	1.67218	8.84412e-14	8.84412e-16
GOTERM_BP_5	GO:0016310~phosphorylation	234	2.41541e-16	ENSMUSG00000050856, ENSMUSG00000025204, ENSMUSG00000001127, ENSMUSG00000030397, ENSMUSG00000046947, ENSMUSG00000033379, ENSMUSG00000022263, ENSMUSG00000021116, ENSMUSG00000024789, ENSMUSG00000020115, ENSMUSG00000025781, ENSMUSG00000027646, ENSMUSG00000021279, ENSMUSG00000062234, ENSMUSG00000074698, ENSMUSG00000019969, ENSMUSG00000025393, ENSMUSG00000027303, ENSMUSG00000021114, ENSMUSG00000016179,…	1.63245	3.88578e-13	3.88578e-15
GOTERM_BP_5	GO:0006396~RNA processing	156	9.84637e-15	ENSMUSG00000029817, ENSMUSG00000024268, ENSMUSG00000032580, ENSMUSG00000031311, ENSMUSG00000053286, ENSMUSG00000029439, ENSMUSG00000040824, ENSMUSG00000034820, ENSMUSG00000059708, ENSMUSG00000021595, ENSMUSG00000038611, ENSMUSG00000027763, ENSMUSG00000022635, ENSMUSG00000036698, ENSMUSG00000006651, ENSMUSG00000037805, ENSMUSG00000002524, ENSMUSG00000022774, ENSMUSG00000038374, ENSMUSG00000024608,…	1.7881	1.71085e-11	1.71085e-13
GOTERM_BP_5	GO:0006886~intracellular protein transport	111	1.28959e-14	ENSMUSG00000028246, ENSMUSG00000000131, ENSMUSG00000078974, ENSMUSG00000041670, ENSMUSG00000025793, ENSMUSG00000069631, ENSMUSG00000042590, ENSMUSG00000039367, ENSMUSG00000028649, ENSMUSG00000021929, ENSMUSG00000021824, ENSMUSG00000022841, ENSMUSG00000030082, ENSMUSG00000032042, ENSMUSG00000005069, ENSMUSG00000020671, ENSMUSG00000020986, ENSMUSG00000021124, ENSMUSG00000021139, ENSMUSG00000034893,…	2.01448	2.23044e-11	2.23044e-13
GOTERM_BP_5	GO:0030163~protein catabolic process	181	1.04989e-12	ENSMUSG00000032307, ENSMUSG00000038822, ENSMUSG00000029176, ENSMUSG00000023977, ENSMUSG00000030451, ENSMUSG00000025103, ENSMUSG00000051234, ENSMUSG00000032905, ENSMUSG00000041773, ENSMUSG00000020265, ENSMUSG00000031066, ENSMUSG00000029686, ENSMUSG00000020124, ENSMUSG00000032301, ENSMUSG00000019578, ENSMUSG00000028309, ENSMUSG00000021301, ENSMUSG00000022443, ENSMUSG00000020114, ENSMUSG00000025217,…	1.63062	1.81816e-09	1.81816e-11
GOTERM_BP_5	GO:0051056~regulation of small GTPase mediated signal transduction	92	2.31904e-12	ENSMUSG00000023353, ENSMUSG00000031442, ENSMUSG00000027347, ENSMUSG00000042203, ENSMUSG00000018001, ENSMUSG00000020745, ENSMUSG00000021662, ENSMUSG00000020374, ENSMUSG00000027652, ENSMUSG00000032870, ENSMUSG00000026883, ENSMUSG00000028059, ENSMUSG00000039178, ENSMUSG00000019467, ENSMUSG00000027255, ENSMUSG00000022957, ENSMUSG00000025555, ENSMUSG00000026159, ENSMUSG00000039844, ENSMUSG00000037999,…	2.02117	4.01582e-09	4.01582e-11
GOTERM_BP_5	GO:0043632~modification-dependent macromolecule catabolic process	167	3.58801e-12	ENSMUSG00000032307, ENSMUSG00000038822, ENSMUSG00000029176, ENSMUSG00000023977, ENSMUSG00000030451, ENSMUSG00000025103, ENSMUSG00000051234, ENSMUSG00000032905, ENSMUSG00000041773, ENSMUSG00000020265, ENSMUSG00000031066, ENSMUSG00000029686, ENSMUSG00000020124, ENSMUSG00000032301, ENSMUSG00000019578, ENSMUSG00000028309, ENSMUSG00000021301, ENSMUSG00000020114, ENSMUSG00000041180, ENSMUSG00000033319,…	1.64665	6.2133e-09	6.2133e-11
GOTERM_BP_5	GO:0044257~cellular protein catabolic process	174	4.86062e-12	ENSMUSG00000032307, ENSMUSG00000038822, ENSMUSG00000029176, ENSMUSG00000023977, ENSMUSG00000030451, ENSMUSG00000025103, ENSMUSG00000051234, ENSMUSG00000032905, ENSMUSG00000041773, ENSMUSG00000020265, ENSMUSG00000031066, ENSMUSG00000029686, ENSMUSG00000020124, ENSMUSG00000032301, ENSMUSG00000019578, ENSMUSG00000028309, ENSMUSG00000021301, ENSMUSG00000022443, ENSMUSG00000020114, ENSMUSG00000041180,…	1.62302	8.41712e-09	8.41712e-11
GOTERM_BP_5	GO:0006897~endocytosis	76	2.04002e-10	ENSMUSG00000040276, ENSMUSG00000039361, ENSMUSG00000020476, ENSMUSG00000020375, ENSMUSG00000020886, ENSMUSG00000024924, ENSMUSG00000066151, ENSMUSG00000028488, ENSMUSG00000027253, ENSMUSG00000017670, ENSMUSG00000022957, ENSMUSG00000041112, ENSMUSG00000021314, ENSMUSG00000036103, ENSMUSG00000035203, ENSMUSG00000009090, ENSMUSG00000021139, ENSMUSG00000040249, ENSMUSG00000035151, ENSMUSG00000024413,…	2.02491	3.53265e-07	3.53265e-09
GOTERM_BP_5	GO:0007268~synaptic transmission	73	2.238e-10	ENSMUSG00000033730, ENSMUSG00000047879, ENSMUSG00000026986, ENSMUSG00000024261, ENSMUSG00000020745, ENSMUSG00000025892, ENSMUSG00000021557, ENSMUSG00000022594, ENSMUSG00000020436, ENSMUSG00000056755, ENSMUSG00000017412, ENSMUSG00000059003, ENSMUSG00000009394, ENSMUSG00000002341, ENSMUSG00000000416, ENSMUSG00000003279, ENSMUSG00000022607, ENSMUSG00000066392, ENSMUSG00000033768, ENSMUSG00000006932,…	2.05424	3.8755e-07	3.8755e-09
GOTERM_BP_5	GO:0006412~translation	111	5.57558e-10	ENSMUSG00000032399, ENSMUSG00000026254, ENSMUSG00000030738, ENSMUSG00000018858, ENSMUSG00000025794, ENSMUSG00000071415, ENSMUSG00000067194, ENSMUSG00000062997, ENSMUSG00000037563, ENSMUSG00000021266, ENSMUSG00000019977, ENSMUSG00000030083, ENSMUSG00000025290, ENSMUSG00000030068, ENSMUSG00000021116, ENSMUSG00000058546, ENSMUSG00000037772, ENSMUSG00000023967, ENSMUSG00000037805, ENSMUSG00000024608,…	1.74294	9.65511e-07	9.65511e-09
GOTERM_BP_5	GO:0007242~intracellular signaling cascade	257	8.11667e-10	ENSMUSG00000050711, ENSMUSG00000047842, ENSMUSG00000001127, ENSMUSG00000024639, ENSMUSG00000022957, ENSMUSG00000039943, ENSMUSG00000022263, ENSMUSG00000027519, ENSMUSG00000021139, ENSMUSG00000000276, ENSMUSG00000004815, ENSMUSG00000031511, ENSMUSG00000017631, ENSMUSG00000024789, ENSMUSG00000030265, ENSMUSG00000033629, ENSMUSG00000054855, ENSMUSG00000064247, ENSMUSG00000062232, ENSMUSG00000056486,…	1.40689	1.40555e-06	1.40555e-08
GOTERM_BP_5	GO:0007611~learning or memory	40	2.53152e-07	ENSMUSG00000026080, ENSMUSG00000025855, ENSMUSG00000037032, ENSMUSG00000029838, ENSMUSG00000040907, ENSMUSG00000020745, ENSMUSG00000038418, ENSMUSG00000020431, ENSMUSG00000056755, ENSMUSG00000059003, ENSMUSG00000037996, ENSMUSG00000022973, ENSMUSG00000022240, ENSMUSG00000021314, ENSMUSG00000025485, ENSMUSG00000008892, ENSMUSG00000028969, ENSMUSG00000022489, ENSMUSG00000079487, ENSMUSG00000020716,…	2.25123	0.000438378	4.38378e-06
GOTERM_BP_5	GO:0009144~purine nucleoside triphosphate metabolic process	45	2.93377e-07	ENSMUSG00000025968, ENSMUSG00000019302, ENSMUSG00000031441, ENSMUSG00000060671, ENSMUSG00000019210, ENSMUSG00000040907, ENSMUSG00000037685, ENSMUSG00000039347, ENSMUSG00000050856, ENSMUSG00000024566, ENSMUSG00000019943, ENSMUSG00000004285, ENSMUSG00000000563, ENSMUSG00000026576, ENSMUSG00000037601, ENSMUSG00000032087, ENSMUSG00000031376, ENSMUSG00000019087, ENSMUSG00000038023, ENSMUSG00000025428,…	2.12645	0.000508034	5.08034e-06
GOTERM_BP_5	GO:0006753~nucleoside phosphate metabolic process	83	5.4155e-07	ENSMUSG00000025968, ENSMUSG00000023456, ENSMUSG00000060671, ENSMUSG00000031441, ENSMUSG00000019210, ENSMUSG00000050856, ENSMUSG00000024566, ENSMUSG00000029780, ENSMUSG00000020431, ENSMUSG00000026576, ENSMUSG00000032087, ENSMUSG00000017412, ENSMUSG00000022994, ENSMUSG00000022840, ENSMUSG00000033379, ENSMUSG00000005580, ENSMUSG00000021871, ENSMUSG00000029467, ENSMUSG00000022295, ENSMUSG00000033161,…	1.68318	0.000937786	9.37786e-06
GOTERM_BP_5	GO:0009966~regulation of signal transduction	184	5.45531e-07	ENSMUSG00000031442, ENSMUSG00000019428, ENSMUSG00000001986, ENSMUSG00000019775, ENSMUSG00000020374, ENSMUSG00000002459, ENSMUSG00000027652, ENSMUSG00000018501, ENSMUSG00000028059, ENSMUSG00000039178, ENSMUSG00000027253, ENSMUSG00000027255, ENSMUSG00000022957, ENSMUSG00000039844, ENSMUSG00000052155, ENSMUSG00000025199, ENSMUSG00000025485, ENSMUSG00000022263, ENSMUSG00000035437, ENSMUSG00000027582,…	1.39433	0.000944681	9.44681e-06
GOTERM_BP_5	GO:0009142~nucleoside triphosphate biosynthetic process	41	6.43715e-07	ENSMUSG00000019302, ENSMUSG00000031441, ENSMUSG00000060671, ENSMUSG00000019210, ENSMUSG00000040907, ENSMUSG00000037685, ENSMUSG00000039347, ENSMUSG00000050856, ENSMUSG00000024566, ENSMUSG00000019943, ENSMUSG00000004285, ENSMUSG00000000563, ENSMUSG00000026576, ENSMUSG00000037601, ENSMUSG00000031376, ENSMUSG00000019087, ENSMUSG00000032087, ENSMUSG00000038023, ENSMUSG00000025428, ENSMUSG00000033379,…	2.16177	0.0011147	1.1147e-05
GOTERM_BP_5	GO:0009150~purine ribonucleotide metabolic process	48	6.73432e-07	ENSMUSG00000025968, ENSMUSG00000019302, ENSMUSG00000031441, ENSMUSG00000060671, ENSMUSG00000019210, ENSMUSG00000040907, ENSMUSG00000037685, ENSMUSG00000039347, ENSMUSG00000050856, ENSMUSG00000024566, ENSMUSG00000019943, ENSMUSG00000029310, ENSMUSG00000004285, ENSMUSG00000000563, ENSMUSG00000026576, ENSMUSG00000037601, ENSMUSG00000032087, ENSMUSG00000031376, ENSMUSG00000019087, ENSMUSG00000038023,…	2.02043	0.00116616	1.16616e-05
GOTERM_BP_5	GO:0048489~synaptic vesicle transport	19	8.46062e-07	ENSMUSG00000022568, ENSMUSG00000006932, ENSMUSG00000039714, ENSMUSG00000034799, ENSMUSG00000024261, ENSMUSG00000020886, ENSMUSG00000026797, ENSMUSG00000031840, ENSMUSG00000035392, ENSMUSG00000047139, ENSMUSG00000007207, ENSMUSG00000022973, ENSMUSG00000019969, ENSMUSG00000033615, ENSMUSG00000021314, ENSMUSG00000063887, ENSMUSG00000029608, ENSMUSG00000028456, ENSMUSG00000061601	3.28175	0.0014651	1.4651e-05
GOTERM_BP_5	GO:0043623~cellular protein complex assembly	44	1.54083e-06	ENSMUSG00000026276, ENSMUSG00000079426, ENSMUSG00000039361, ENSMUSG00000000131, ENSMUSG00000043866, ENSMUSG00000042709, ENSMUSG00000001440, ENSMUSG00000042590, ENSMUSG00000023004, ENSMUSG00000045136, ENSMUSG00000033066, ENSMUSG00000027253, ENSMUSG00000030662, ENSMUSG00000022973, ENSMUSG00000021573, ENSMUSG00000000416, ENSMUSG00000044716, ENSMUSG00000026202, ENSMUSG00000022607, ENSMUSG00000062380,…	2.0407	0.00266819	2.66819e-05
GOTERM_BP_5	GO:0006164~purine nucleotide biosynthetic process	52	1.89548e-06	ENSMUSG00000031441, ENSMUSG00000060671, ENSMUSG00000019210, ENSMUSG00000050856, ENSMUSG00000024566, ENSMUSG00000020431, ENSMUSG00000026576, ENSMUSG00000032087, ENSMUSG00000022994, ENSMUSG00000022840, ENSMUSG00000033379, ENSMUSG00000005580, ENSMUSG00000021871, ENSMUSG00000029467, ENSMUSG00000022295, ENSMUSG00000052459, ENSMUSG00000033161, ENSMUSG00000032570, ENSMUSG00000027546, ENSMUSG00000025781,…	1.90122	0.00328232	3.28232e-05
GOTERM_BP_5	GO:0009260~ribonucleotide biosynthetic process	44	3.61148e-06	ENSMUSG00000019302, ENSMUSG00000031441, ENSMUSG00000060671, ENSMUSG00000019210, ENSMUSG00000040907, ENSMUSG00000037685, ENSMUSG00000039347, ENSMUSG00000050856, ENSMUSG00000024566, ENSMUSG00000019943, ENSMUSG00000004285, ENSMUSG00000000563, ENSMUSG00000026576, ENSMUSG00000079104, ENSMUSG00000037601, ENSMUSG00000031376, ENSMUSG00000019087, ENSMUSG00000032087, ENSMUSG00000038023, ENSMUSG00000062867,…	1.98554	0.00625374	6.25374e-05
GOTERM_BP_5	GO:0007264~small GTPase mediated signal transduction	83	3.84621e-06	ENSMUSG00000028057, ENSMUSG00000023353, ENSMUSG00000031442, ENSMUSG00000027347, ENSMUSG00000036273, ENSMUSG00000028249, ENSMUSG00000024870, ENSMUSG00000020476, ENSMUSG00000020374, ENSMUSG00000003037, ENSMUSG00000047842, ENSMUSG00000034930, ENSMUSG00000017144, ENSMUSG00000019173, ENSMUSG00000057455, ENSMUSG00000004451, ENSMUSG00000004768, ENSMUSG00000022957, ENSMUSG00000039844, ENSMUSG00000041112,…	1.61142	0.00666019	6.66019e-05
GOTERM_BP_5	GO:0006457~protein folding	48	5.69984e-06	ENSMUSG00000019428, ENSMUSG00000071866, ENSMUSG00000021037, ENSMUSG00000003226, ENSMUSG00000052033, ENSMUSG00000028035, ENSMUSG00000030007, ENSMUSG00000036052, ENSMUSG00000032525, ENSMUSG00000028960, ENSMUSG00000037072, ENSMUSG00000015656, ENSMUSG00000056629, ENSMUSG00000073676, ENSMUSG00000000826, ENSMUSG00000001289, ENSMUSG00000034024, ENSMUSG00000066151, ENSMUSG00000028410, ENSMUSG00000019802,…	1.89316	0.00986984	9.86984e-05
GOTERM_BP_5	GO:0031175~neuron projection development	72	6.57408e-06	ENSMUSG00000029516, ENSMUSG00000028883, ENSMUSG00000021662, ENSMUSG00000017485, ENSMUSG00000052516, ENSMUSG00000033066, ENSMUSG00000043733, ENSMUSG00000022995, ENSMUSG00000028289, ENSMUSG00000032547, ENSMUSG00000022601, ENSMUSG00000022607, ENSMUSG00000006464, ENSMUSG00000031391, ENSMUSG00000022636, ENSMUSG00000011751, ENSMUSG00000045103, ENSMUSG00000026782, ENSMUSG00000053398, ENSMUSG00000021066,…	1.65434	0.0113836	0.000113836
GOTERM_BP_5	GO:0043087~regulation of GTPase activity	38	8.27003e-06	ENSMUSG00000023353, ENSMUSG00000052302, ENSMUSG00000022568, ENSMUSG00000042203, ENSMUSG00000028030, ENSMUSG00000011877, ENSMUSG00000020745, ENSMUSG00000027575, ENSMUSG00000032870, ENSMUSG00000025422, ENSMUSG00000039178, ENSMUSG00000036644, ENSMUSG00000027255, ENSMUSG00000026159, ENSMUSG00000037999, ENSMUSG00000026155, ENSMUSG00000021218, ENSMUSG00000015291, ENSMUSG00000002496, ENSMUSG00000022749,…	2.04668	0.0143201	0.000143201
GOTERM_BP_5	GO:0006417~regulation of translation	40	8.36733e-06	ENSMUSG00000062078, ENSMUSG00000029613, ENSMUSG00000026254, ENSMUSG00000025571, ENSMUSG00000037058, ENSMUSG00000020190, ENSMUSG00000005610, ENSMUSG00000009549, ENSMUSG00000001729, ENSMUSG00000052707, ENSMUSG00000058301, ENSMUSG00000020459, ENSMUSG00000028760, ENSMUSG00000031668, ENSMUSG00000039782, ENSMUSG00000028580, ENSMUSG00000020594, ENSMUSG00000024483, ENSMUSG00000030068, ENSMUSG00000021116,…	2.00359	0.0144886	0.000144886
GOTERM_BP_5	GO:0010608~posttranscriptional regulation of gene expression	53	1.05863e-05	ENSMUSG00000029613, ENSMUSG00000001424, ENSMUSG00000026254, ENSMUSG00000031167, ENSMUSG00000037058, ENSMUSG00000005610, ENSMUSG00000058301, ENSMUSG00000052707, ENSMUSG00000039782, ENSMUSG00000028580, ENSMUSG00000030068, ENSMUSG00000027002, ENSMUSG00000021116, ENSMUSG00000036698, ENSMUSG00000006651, ENSMUSG00000003235, ENSMUSG00000022774, ENSMUSG00000022204, ENSMUSG00000038374, ENSMUSG00000030122,…	1.79376	0.0183304	0.000183304
GOTERM_BP_5	GO:0007269~neurotransmitter secretion	20	1.19678e-05	ENSMUSG00000033768, ENSMUSG00000022568, ENSMUSG00000039714, ENSMUSG00000024261, ENSMUSG00000003872, ENSMUSG00000031840, ENSMUSG00000004113, ENSMUSG00000007207, ENSMUSG00000028657, ENSMUSG00000009394, ENSMUSG00000022973, ENSMUSG00000019969, ENSMUSG00000033615, ENSMUSG00000029608, ENSMUSG00000027273, ENSMUSG00000063887, ENSMUSG00000024109, ENSMUSG00000066392, ENSMUSG00000028456, ENSMUSG00000061601	2.78277	0.0207224	0.000207224
GOTERM_BP_5	GO:0019320~hexose catabolic process	25	1.74863e-05	ENSMUSG00000021748, ENSMUSG00000032294, ENSMUSG00000023456, ENSMUSG00000021913, ENSMUSG00000028961, ENSMUSG00000017390, ENSMUSG00000063229, ENSMUSG00000062070, ENSMUSG00000004267, ENSMUSG00000033065, ENSMUSG00000020456, ENSMUSG00000057666, ENSMUSG00000022536, ENSMUSG00000020321, ENSMUSG00000029776, ENSMUSG00000031299, ENSMUSG00000020277, ENSMUSG00000063524, ENSMUSG00000036427, ENSMUSG00000021196,…	2.40816	0.0302764	0.000302764
GOTERM_BP_5	GO:0048193~Golgi vesicle transport	25	1.74863e-05	ENSMUSG00000049299, ENSMUSG00000034602, ENSMUSG00000021248, ENSMUSG00000039367, ENSMUSG00000055681, ENSMUSG00000041891, ENSMUSG00000026577, ENSMUSG00000024941, ENSMUSG00000026470, ENSMUSG00000079317, ENSMUSG00000001052, ENSMUSG00000020986, ENSMUSG00000037643, ENSMUSG00000029148, ENSMUSG00000034893, ENSMUSG00000031889, ENSMUSG00000029705, ENSMUSG00000027799, ENSMUSG00000029229, ENSMUSG00000030304,…	2.40816	0.0302764	0.000302764
GOTERM_BP_5	GO:0000902~cell morphogenesis	93	2.00563e-05	ENSMUSG00000078970, ENSMUSG00000024969, ENSMUSG00000018209, ENSMUSG00000028883, ENSMUSG00000021662, ENSMUSG00000017485, ENSMUSG00000052516, ENSMUSG00000004364, ENSMUSG00000033066, ENSMUSG00000028059, ENSMUSG00000028649, ENSMUSG00000021669, ENSMUSG00000043733, ENSMUSG00000022995, ENSMUSG00000028289, ENSMUSG00000032547, ENSMUSG00000022601, ENSMUSG00000022607, ENSMUSG00000006464, ENSMUSG00000031391,…	1.50756	0.0347254	0.000347254
GOTERM_BP_5	GO:0051969~regulation of transmission of nerve impulse	41	2.10247e-05	ENSMUSG00000021910, ENSMUSG00000041670, ENSMUSG00000020886, ENSMUSG00000026797, ENSMUSG00000032562, ENSMUSG00000024617, ENSMUSG00000054814, ENSMUSG00000031668, ENSMUSG00000059003, ENSMUSG00000062661, ENSMUSG00000037996, ENSMUSG00000022935, ENSMUSG00000022240, ENSMUSG00000032482, ENSMUSG00000063887, ENSMUSG00000022415, ENSMUSG00000028969, ENSMUSG00000005360, ENSMUSG00000033577, ENSMUSG00000023845,…	1.91933	0.0364019	0.000364019
GOTERM_BP_5	GO:0050804~regulation of synaptic transmission	39	2.1836e-05	ENSMUSG00000021910, ENSMUSG00000041670, ENSMUSG00000020886, ENSMUSG00000026797, ENSMUSG00000032562, ENSMUSG00000024617, ENSMUSG00000054814, ENSMUSG00000059003, ENSMUSG00000062661, ENSMUSG00000037996, ENSMUSG00000022935, ENSMUSG00000022240, ENSMUSG00000032482, ENSMUSG00000063887, ENSMUSG00000022415, ENSMUSG00000028969, ENSMUSG00000005360, ENSMUSG00000033577, ENSMUSG00000023845, ENSMUSG00000079487,…	1.9535	0.0378063	0.000378063
GOTERM_BP_5	GO:0051246~regulation of protein metabolic process	103	2.23469e-05	ENSMUSG00000032307, ENSMUSG00000029613, ENSMUSG00000026254, ENSMUSG00000018501, ENSMUSG00000037058, ENSMUSG00000052707, ENSMUSG00000016481, ENSMUSG00000052155, ENSMUSG00000028580, ENSMUSG00000049044, ENSMUSG00000030068, ENSMUSG00000021116, ENSMUSG00000036698, ENSMUSG00000079415, ENSMUSG00000006651, ENSMUSG00000024789, ENSMUSG00000022774, ENSMUSG00000030122, ENSMUSG00000038374, ENSMUSG00000006728,…	1.46987	0.0386906	0.000386906
GOTERM_BP_5	GO:0032990~cell part morphogenesis	68	3.50449e-05	ENSMUSG00000028883, ENSMUSG00000021662, ENSMUSG00000017485, ENSMUSG00000052516, ENSMUSG00000033066, ENSMUSG00000021669, ENSMUSG00000043733, ENSMUSG00000022995, ENSMUSG00000028289, ENSMUSG00000032547, ENSMUSG00000022601, ENSMUSG00000022607, ENSMUSG00000006464, ENSMUSG00000031391, ENSMUSG00000022636, ENSMUSG00000011751, ENSMUSG00000045103, ENSMUSG00000024253, ENSMUSG00000047193, ENSMUSG00000021066,…	1.60665	0.0606692	0.000606692
GOTERM_BP_5	GO:0031644~regulation of neurological system process	42	3.76888e-05	ENSMUSG00000021910, ENSMUSG00000041670, ENSMUSG00000020886, ENSMUSG00000026797, ENSMUSG00000032562, ENSMUSG00000024617, ENSMUSG00000054814, ENSMUSG00000062661, ENSMUSG00000031668, ENSMUSG00000059003, ENSMUSG00000037996, ENSMUSG00000022935, ENSMUSG00000022240, ENSMUSG00000032482, ENSMUSG00000063887, ENSMUSG00000022415, ENSMUSG00000028969, ENSMUSG00000005360, ENSMUSG00000033577, ENSMUSG00000023845,…	1.86174	0.0652448	0.000652448
GOTERM_BP_5	GO:0046365~monosaccharide catabolic process	25	3.79407e-05	ENSMUSG00000021748, ENSMUSG00000032294, ENSMUSG00000023456, ENSMUSG00000021913, ENSMUSG00000028961, ENSMUSG00000017390, ENSMUSG00000063229, ENSMUSG00000062070, ENSMUSG00000004267, ENSMUSG00000033065, ENSMUSG00000020456, ENSMUSG00000057666, ENSMUSG00000022536, ENSMUSG00000020321, ENSMUSG00000029776, ENSMUSG00000031299, ENSMUSG00000020277, ENSMUSG00000063524, ENSMUSG00000036427, ENSMUSG00000021196,…	2.31897	0.0656807	0.000656807
GOTERM_BP_5	GO:0048858~cell projection morphogenesis	65	4.77311e-05	ENSMUSG00000028883, ENSMUSG00000021662, ENSMUSG00000017485, ENSMUSG00000052516, ENSMUSG00000033066, ENSMUSG00000043733, ENSMUSG00000022995, ENSMUSG00000028289, ENSMUSG00000032547, ENSMUSG00000022601, ENSMUSG00000022607, ENSMUSG00000006464, ENSMUSG00000031391, ENSMUSG00000022636, ENSMUSG00000011751, ENSMUSG00000045103, ENSMUSG00000024253, ENSMUSG00000047193, ENSMUSG00000021066, ENSMUSG00000020900,…	1.6118	0.0826229	0.000826229
GOTERM_BP_5	GO:0006913~nucleocytoplasmic transport	37	4.94452e-05	ENSMUSG00000017801, ENSMUSG00000000131, ENSMUSG00000040463, ENSMUSG00000069631, ENSMUSG00000001440, ENSMUSG00000055116, ENSMUSG00000042590, ENSMUSG00000028676, ENSMUSG00000030272, ENSMUSG00000021929, ENSMUSG00000027787, ENSMUSG00000067150, ENSMUSG00000030662, ENSMUSG00000018362, ENSMUSG00000020315, ENSMUSG00000002496, ENSMUSG00000027782, ENSMUSG00000031922, ENSMUSG00000034544, ENSMUSG00000038393,…	1.93054	0.0855887	0.000855887
GOTERM_BP_5	GO:0034220~ion transmembrane transport	21	4.99147e-05	ENSMUSG00000019302, ENSMUSG00000022295, ENSMUSG00000052459, ENSMUSG00000019210, ENSMUSG00000022890, ENSMUSG00000039347, ENSMUSG00000050856, ENSMUSG00000025781, ENSMUSG00000004285, ENSMUSG00000034566, ENSMUSG00000000563, ENSMUSG00000019087, ENSMUSG00000038023, ENSMUSG00000025428, ENSMUSG00000033793, ENSMUSG00000033379, ENSMUSG00000033792, ENSMUSG00000024121, ENSMUSG00000025393, ENSMUSG00000023030,…	2.50449	0.0864011	0.000864011
GOTERM_BP_5	GO:0006605~protein targeting	47	5.22877e-05	ENSMUSG00000028246, ENSMUSG00000000131, ENSMUSG00000021709, ENSMUSG00000078974, ENSMUSG00000021686, ENSMUSG00000069631, ENSMUSG00000001440, ENSMUSG00000055116, ENSMUSG00000042590, ENSMUSG00000079108, ENSMUSG00000009549, ENSMUSG00000021929, ENSMUSG00000028649, ENSMUSG00000027828, ENSMUSG00000067150, ENSMUSG00000030662, ENSMUSG00000018362, ENSMUSG00000032042, ENSMUSG00000020315, ENSMUSG00000002496,…	1.77009	0.090507	0.00090507
GOTERM_BP_5	GO:0034654~nucleobase, nucleoside, nucleotide and nucleic acid biosynthetic process	59	5.24562e-05	ENSMUSG00000031441, ENSMUSG00000060671, ENSMUSG00000019210, ENSMUSG00000050856, ENSMUSG00000024566, ENSMUSG00000020431, ENSMUSG00000026576, ENSMUSG00000032087, ENSMUSG00000022994, ENSMUSG00000022840, ENSMUSG00000033379, ENSMUSG00000005580, ENSMUSG00000021871, ENSMUSG00000029467, ENSMUSG00000022295, ENSMUSG00000052459, ENSMUSG00000033161, ENSMUSG00000032570, ENSMUSG00000027546, ENSMUSG00000025781,…	1.651	0.0907984	0.000907984
GOTERM_BP_5	GO:0034404~nucleobase, nucleoside and nucleotide biosynthetic process	59	5.24562e-05	ENSMUSG00000031441, ENSMUSG00000060671, ENSMUSG00000019210, ENSMUSG00000050856, ENSMUSG00000024566, ENSMUSG00000020431, ENSMUSG00000026576, ENSMUSG00000032087, ENSMUSG00000022994, ENSMUSG00000022840, ENSMUSG00000033379, ENSMUSG00000005580, ENSMUSG00000021871, ENSMUSG00000029467, ENSMUSG00000022295, ENSMUSG00000052459, ENSMUSG00000033161, ENSMUSG00000032570, ENSMUSG00000027546, ENSMUSG00000025781,…	1.651	0.0907984	0.000907984
GOTERM_BP_5	GO:0001505~regulation of neurotransmitter levels	27	6.20648e-05	ENSMUSG00000022568, ENSMUSG00000000326, ENSMUSG00000028964, ENSMUSG00000026986, ENSMUSG00000024261, ENSMUSG00000021557, ENSMUSG00000004113, ENSMUSG00000009394, ENSMUSG00000033615, ENSMUSG00000022973, ENSMUSG00000027273, ENSMUSG00000063887, ENSMUSG00000066392, ENSMUSG00000061601, ENSMUSG00000033768, ENSMUSG00000039714, ENSMUSG00000003872, ENSMUSG00000026787, ENSMUSG00000070880, ENSMUSG00000031840,…	2.18133	0.107422	0.00107422
GOTERM_BP_5	GO:0006606~protein import into nucleus	25	7.7737e-05	ENSMUSG00000038393, ENSMUSG00000057322, ENSMUSG00000000131, ENSMUSG00000024789, ENSMUSG00000001440, ENSMUSG00000055116, ENSMUSG00000042590, ENSMUSG00000009470, ENSMUSG00000003731, ENSMUSG00000068742, ENSMUSG00000021929, ENSMUSG00000022905, ENSMUSG00000002319, ENSMUSG00000041879, ENSMUSG00000006005, ENSMUSG00000040029, ENSMUSG00000002718, ENSMUSG00000026020, ENSMUSG00000030662, ENSMUSG00000018362,…	2.23615	0.13453	0.0013453
GOTERM_BP_5	GO:0051169~nuclear transport	37	8.15994e-05	ENSMUSG00000017801, ENSMUSG00000000131, ENSMUSG00000040463, ENSMUSG00000069631, ENSMUSG00000001440, ENSMUSG00000055116, ENSMUSG00000042590, ENSMUSG00000028676, ENSMUSG00000030272, ENSMUSG00000021929, ENSMUSG00000027787, ENSMUSG00000067150, ENSMUSG00000030662, ENSMUSG00000018362, ENSMUSG00000020315, ENSMUSG00000002496, ENSMUSG00000027782, ENSMUSG00000031922, ENSMUSG00000034544, ENSMUSG00000038393,…	1.89115	0.14121	0.0014121
GOTERM_BP_5	GO:0015985~energy coupled proton transport, down electrochemical gradient	19	8.32116e-05	ENSMUSG00000019302, ENSMUSG00000022295, ENSMUSG00000052459, ENSMUSG00000019210, ENSMUSG00000022890, ENSMUSG00000039347, ENSMUSG00000050856, ENSMUSG00000025781, ENSMUSG00000004285, ENSMUSG00000034566, ENSMUSG00000000563, ENSMUSG00000019087, ENSMUSG00000038023, ENSMUSG00000025428, ENSMUSG00000033793, ENSMUSG00000033379, ENSMUSG00000024121, ENSMUSG00000025393, ENSMUSG00000021114	2.57218	0.143998	0.00143998
GOTERM_BP_5	GO:0015986~ATP synthesis coupled proton transport	19	8.32116e-05	ENSMUSG00000019302, ENSMUSG00000022295, ENSMUSG00000052459, ENSMUSG00000019210, ENSMUSG00000022890, ENSMUSG00000039347, ENSMUSG00000050856, ENSMUSG00000025781, ENSMUSG00000004285, ENSMUSG00000034566, ENSMUSG00000000563, ENSMUSG00000019087, ENSMUSG00000038023, ENSMUSG00000025428, ENSMUSG00000033793, ENSMUSG00000033379, ENSMUSG00000024121, ENSMUSG00000025393, ENSMUSG00000021114	2.57218	0.143998	0.00143998
GOTERM_BP_5	GO:0007632~visual behavior	17	8.37756e-05	ENSMUSG00000022489, ENSMUSG00000020716, ENSMUSG00000079487, ENSMUSG00000037032, ENSMUSG00000022892, ENSMUSG00000040907, ENSMUSG00000030265, ENSMUSG00000027852, ENSMUSG00000021670, ENSMUSG00000059003, ENSMUSG00000047459, ENSMUSG00000026959, ENSMUSG00000031302, ENSMUSG00000025485, ENSMUSG00000007097, ENSMUSG00000028969, ENSMUSG00000005089	2.74686	0.144973	0.00144973
GOTERM_BP_5	GO:0000059~protein import into nucleus, docking	11	0.00010978	ENSMUSG00000002319, ENSMUSG00000041879, ENSMUSG00000000131, ENSMUSG00000002718, ENSMUSG00000040029, ENSMUSG00000030662, ENSMUSG00000001440, ENSMUSG00000042590, ENSMUSG00000009470, ENSMUSG00000066232, ENSMUSG00000020290	3.67325	0.189933	0.00189933
GOTERM_BP_5	GO:0033365~protein localization in organelle	36	0.000153944	ENSMUSG00000078970, ENSMUSG00000028246, ENSMUSG00000000131, ENSMUSG00000001440, ENSMUSG00000055116, ENSMUSG00000042590, ENSMUSG00000020077, ENSMUSG00000079108, ENSMUSG00000009549, ENSMUSG00000033953, ENSMUSG00000021929, ENSMUSG00000028649, ENSMUSG00000030662, ENSMUSG00000032042, ENSMUSG00000018362, ENSMUSG00000020315, ENSMUSG00000002496, ENSMUSG00000027782, ENSMUSG00000031922, ENSMUSG00000024847,…	1.859	0.266247	0.00266247
GOTERM_BP_5	GO:0030705~cytoskeleton-dependent intracellular transport	17	0.000216403	ENSMUSG00000034593, ENSMUSG00000037032, ENSMUSG00000022892, ENSMUSG00000006930, ENSMUSG00000022443, ENSMUSG00000030739, ENSMUSG00000020745, ENSMUSG00000025733, ENSMUSG00000020900, ENSMUSG00000006740, ENSMUSG00000022054, ENSMUSG00000029207, ENSMUSG00000029757, ENSMUSG00000063077, ENSMUSG00000018736, ENSMUSG00000021288, ENSMUSG00000026131	2.58038	0.37408	0.0037408
GOTERM_BP_5	GO:0048812~neuron projection morphogenesis	56	0.000234129	ENSMUSG00000028883, ENSMUSG00000021662, ENSMUSG00000017485, ENSMUSG00000052516, ENSMUSG00000033066, ENSMUSG00000043733, ENSMUSG00000022995, ENSMUSG00000028289, ENSMUSG00000032547, ENSMUSG00000022601, ENSMUSG00000022607, ENSMUSG00000031391, ENSMUSG00000022636, ENSMUSG00000011751, ENSMUSG00000045103, ENSMUSG00000021066, ENSMUSG00000020900, ENSMUSG00000028832, ENSMUSG00000068748, ENSMUSG00000079076,…	1.59377	0.404664	0.00404664
GOTERM_BP_5	GO:0022008~neurogenesis	141	0.00027471	ENSMUSG00000071866, ENSMUSG00000029516, ENSMUSG00000059146, ENSMUSG00000019777, ENSMUSG00000033066, ENSMUSG00000024639, ENSMUSG00000036766, ENSMUSG00000005069, ENSMUSG00000062380, ENSMUSG00000006464, ENSMUSG00000031391, ENSMUSG00000019971, ENSMUSG00000022636, ENSMUSG00000050071, ENSMUSG00000079415, ENSMUSG00000029603, ENSMUSG00000053398, ENSMUSG00000034586, ENSMUSG00000018965, ENSMUSG00000021066,…	1.31521	0.474646	0.00474646
GOTERM_BP_5	GO:0044275~cellular carbohydrate catabolic process	25	0.000280713	ENSMUSG00000021748, ENSMUSG00000032294, ENSMUSG00000023456, ENSMUSG00000021913, ENSMUSG00000028961, ENSMUSG00000017390, ENSMUSG00000063229, ENSMUSG00000062070, ENSMUSG00000004267, ENSMUSG00000033065, ENSMUSG00000020456, ENSMUSG00000057666, ENSMUSG00000022536, ENSMUSG00000020321, ENSMUSG00000029776, ENSMUSG00000031299, ENSMUSG00000020277, ENSMUSG00000063524, ENSMUSG00000036427, ENSMUSG00000021196,…	2.08707	0.484993	0.00484993
GOTERM_BP_5	GO:0032268~regulation of cellular protein metabolic process	81	0.000299194	ENSMUSG00000029613, ENSMUSG00000025855, ENSMUSG00000026254, ENSMUSG00000032601, ENSMUSG00000018501, ENSMUSG00000037058, ENSMUSG00000005610, ENSMUSG00000052707, ENSMUSG00000058301, ENSMUSG00000004768, ENSMUSG00000016481, ENSMUSG00000032405, ENSMUSG00000052155, ENSMUSG00000039782, ENSMUSG00000044716, ENSMUSG00000025856, ENSMUSG00000028580, ENSMUSG00000066551, ENSMUSG00000049044, ENSMUSG00000030068,…	1.44903	0.516846	0.00516846
GOTERM_BP_5	GO:0016079~synaptic vesicle exocytosis	11	0.000479287	ENSMUSG00000022568, ENSMUSG00000039714, ENSMUSG00000007207, ENSMUSG00000022973, ENSMUSG00000019969, ENSMUSG00000033615, ENSMUSG00000029608, ENSMUSG00000063887, ENSMUSG00000028456, ENSMUSG00000031840, ENSMUSG00000061601	3.2411	0.826733	0.00826733
GOTERM_BP_5	GO:0006887~exocytosis	38	0.00050492	ENSMUSG00000022568, ENSMUSG00000053841, ENSMUSG00000034799, ENSMUSG00000034593, ENSMUSG00000052301, ENSMUSG00000041670, ENSMUSG00000022829, ENSMUSG00000019790, ENSMUSG00000017978, ENSMUSG00000040722, ENSMUSG00000036435, ENSMUSG00000021248, ENSMUSG00000029763, ENSMUSG00000026797, ENSMUSG00000021357, ENSMUSG00000038453, ENSMUSG00000033615, ENSMUSG00000022973, ENSMUSG00000061244, ENSMUSG00000021687,…	1.73037	0.870767	0.00870767
GOTERM_BP_5	GO:0008542~visual learning	15	0.000566056	ENSMUSG00000022489, ENSMUSG00000020716, ENSMUSG00000079487, ENSMUSG00000037032, ENSMUSG00000022892, ENSMUSG00000040907, ENSMUSG00000030265, ENSMUSG00000027852, ENSMUSG00000021670, ENSMUSG00000059003, ENSMUSG00000026959, ENSMUSG00000031302, ENSMUSG00000025485, ENSMUSG00000007097, ENSMUSG00000028969	2.59085	0.975713	0.00975713
GOTERM_BP_5	GO:0048488~synaptic vesicle endocytosis	9	0.000568164	ENSMUSG00000022568, ENSMUSG00000034799, ENSMUSG00000035392, ENSMUSG00000047139, ENSMUSG00000022973, ENSMUSG00000021314, ENSMUSG00000020886, ENSMUSG00000026797, ENSMUSG00000031840	3.75673	0.979331	0.00979331
GOTERM_BP_5	GO:0015992~proton transport	22	0.00056971	ENSMUSG00000019302, ENSMUSG00000022295, ENSMUSG00000024403, ENSMUSG00000052459, ENSMUSG00000019210, ENSMUSG00000022890, ENSMUSG00000039347, ENSMUSG00000050856, ENSMUSG00000025781, ENSMUSG00000004285, ENSMUSG00000034566, ENSMUSG00000000563, ENSMUSG00000025453, ENSMUSG00000019087, ENSMUSG00000038023, ENSMUSG00000025428, ENSMUSG00000033793, ENSMUSG00000033379, ENSMUSG00000024121, ENSMUSG00000025393,…	2.11918	0.981983	0.00981983
GOTERM_BP_5	GO:0032940~secretion by cell	57	0.000585517	ENSMUSG00000024563, ENSMUSG00000053841, ENSMUSG00000041670, ENSMUSG00000017978, ENSMUSG00000040722, ENSMUSG00000024261, ENSMUSG00000036435, ENSMUSG00000032872, ENSMUSG00000021357, ENSMUSG00000038453, ENSMUSG00000009394, ENSMUSG00000061244, ENSMUSG00000066392, ENSMUSG00000049044, ENSMUSG00000033768, ENSMUSG00000030534, ENSMUSG00000039714, ENSMUSG00000019726, ENSMUSG00000033769, ENSMUSG00000020900,…	1.53501	1.0091	0.010091
GOTERM_BP_5	GO:0048667~cell morphogenesis involved in neuron differentiation	56	0.000590552	ENSMUSG00000028883, ENSMUSG00000021662, ENSMUSG00000017485, ENSMUSG00000052516, ENSMUSG00000043733, ENSMUSG00000022995, ENSMUSG00000028289, ENSMUSG00000032547, ENSMUSG00000022601, ENSMUSG00000022607, ENSMUSG00000006464, ENSMUSG00000031391, ENSMUSG00000005360, ENSMUSG00000022636, ENSMUSG00000011751, ENSMUSG00000021066, ENSMUSG00000020900, ENSMUSG00000028832, ENSMUSG00000068748, ENSMUSG00000079076,…	1.54122	1.01773	0.0101773
GOTERM_BP_5	GO:0007409~axonogenesis	51	0.00070639	ENSMUSG00000028883, ENSMUSG00000021662, ENSMUSG00000017485, ENSMUSG00000052516, ENSMUSG00000043733, ENSMUSG00000022995, ENSMUSG00000028289, ENSMUSG00000032547, ENSMUSG00000022601, ENSMUSG00000022607, ENSMUSG00000031391, ENSMUSG00000022636, ENSMUSG00000011751, ENSMUSG00000021066, ENSMUSG00000028832, ENSMUSG00000020900, ENSMUSG00000068748, ENSMUSG00000079076, ENSMUSG00000026442, ENSMUSG00000004798,…	1.56723	1.21622	0.0121622
GOTERM_BP_5	GO:0048666~neuron development	82	0.000744094	ENSMUSG00000029516, ENSMUSG00000028883, ENSMUSG00000021662, ENSMUSG00000017485, ENSMUSG00000052516, ENSMUSG00000033066, ENSMUSG00000024639, ENSMUSG00000043733, ENSMUSG00000022995, ENSMUSG00000028289, ENSMUSG00000032547, ENSMUSG00000022601, ENSMUSG00000022607, ENSMUSG00000006464, ENSMUSG00000031391, ENSMUSG00000019971, ENSMUSG00000005360, ENSMUSG00000022636, ENSMUSG00000011751, ENSMUSG00000079415,…	1.40663	1.28074	0.0128074
GOTERM_BP_5	GO:0000245~spliceosome assembly	10	0.000765473	ENSMUSG00000001767, ENSMUSG00000024268, ENSMUSG00000021645, ENSMUSG00000028134, ENSMUSG00000062604, ENSMUSG00000032580, ENSMUSG00000028676, ENSMUSG00000005506, ENSMUSG00000002107, ENSMUSG00000027763	3.33932	1.31731	0.0131731
GOTERM_BP_5	GO:0010970~microtubule-based transport	11	0.000886047	ENSMUSG00000006740, ENSMUSG00000022054, ENSMUSG00000006930, ENSMUSG00000022892, ENSMUSG00000020745, ENSMUSG00000029757, ENSMUSG00000063077, ENSMUSG00000018736, ENSMUSG00000025733, ENSMUSG00000021288, ENSMUSG00000026131	3.06104	1.52331	0.0152331
GOTERM_BP_5	GO:0048699~generation of neurons	128	0.00115927	ENSMUSG00000071866, ENSMUSG00000029516, ENSMUSG00000059146, ENSMUSG00000019777, ENSMUSG00000033066, ENSMUSG00000024639, ENSMUSG00000005069, ENSMUSG00000062380, ENSMUSG00000006464, ENSMUSG00000031391, ENSMUSG00000019971, ENSMUSG00000022636, ENSMUSG00000050071, ENSMUSG00000079415, ENSMUSG00000053398, ENSMUSG00000034586, ENSMUSG00000018965, ENSMUSG00000021066, ENSMUSG00000020900, ENSMUSG00000028832,…	1.29004	1.98861	0.0198861
GOTERM_BP_5	GO:0022618~ribonucleoprotein complex assembly	16	0.00117799	ENSMUSG00000024268, ENSMUSG00000027810, ENSMUSG00000032580, ENSMUSG00000024608, ENSMUSG00000024991, ENSMUSG00000028676, ENSMUSG00000016554, ENSMUSG00000001767, ENSMUSG00000021645, ENSMUSG00000028134, ENSMUSG00000062604, ENSMUSG00000060098, ENSMUSG00000022601, ENSMUSG00000005506, ENSMUSG00000027763, ENSMUSG00000002107	2.35717	2.02041	0.0202041
GOTERM_BP_5	GO:0000904~cell morphogenesis involved in differentiation	62	0.00122236	ENSMUSG00000078970, ENSMUSG00000028883, ENSMUSG00000021662, ENSMUSG00000017485, ENSMUSG00000052516, ENSMUSG00000004364, ENSMUSG00000043733, ENSMUSG00000022995, ENSMUSG00000028289, ENSMUSG00000032547, ENSMUSG00000022601, ENSMUSG00000022607, ENSMUSG00000006464, ENSMUSG00000031391, ENSMUSG00000005360, ENSMUSG00000022636, ENSMUSG00000006932, ENSMUSG00000011751, ENSMUSG00000022443, ENSMUSG00000021066,…	1.46489	2.09575	0.0209575
GOTERM_BP_5	GO:0050658~RNA transport	25	0.00140715	ENSMUSG00000025134, ENSMUSG00000062078, ENSMUSG00000003226, ENSMUSG00000034274, ENSMUSG00000022338, ENSMUSG00000078812, ENSMUSG00000022774, ENSMUSG00000053453, ENSMUSG00000038374, ENSMUSG00000028676, ENSMUSG00000029405, ENSMUSG00000010097, ENSMUSG00000040667, ENSMUSG00000052533, ENSMUSG00000000838, ENSMUSG00000022855, ENSMUSG00000004980, ENSMUSG00000040549, ENSMUSG00000024120, ENSMUSG00000039509,…	1.89734	2.40896	0.0240896
GOTERM_BP_5	GO:0050657~nucleic acid transport	25	0.00140715	ENSMUSG00000025134, ENSMUSG00000062078, ENSMUSG00000003226, ENSMUSG00000034274, ENSMUSG00000022338, ENSMUSG00000078812, ENSMUSG00000022774, ENSMUSG00000053453, ENSMUSG00000038374, ENSMUSG00000028676, ENSMUSG00000029405, ENSMUSG00000010097, ENSMUSG00000040667, ENSMUSG00000052533, ENSMUSG00000000838, ENSMUSG00000022855, ENSMUSG00000004980, ENSMUSG00000040549, ENSMUSG00000024120, ENSMUSG00000039509,…	1.89734	2.40896	0.0240896
GOTERM_BP_5	GO:0007243~protein kinase cascade	67	0.00175872	ENSMUSG00000000441, ENSMUSG00000024969, ENSMUSG00000025658, ENSMUSG00000050711, ENSMUSG00000028530, ENSMUSG00000053137, ENSMUSG00000034761, ENSMUSG00000040687, ENSMUSG00000043733, ENSMUSG00000004865, ENSMUSG00000062604, ENSMUSG00000025551, ENSMUSG00000032405, ENSMUSG00000025199, ENSMUSG00000002496, ENSMUSG00000002948, ENSMUSG00000024789, ENSMUSG00000033629, ENSMUSG00000005161, ENSMUSG00000063358,…	1.42204	3.00223	0.0300223
GOTERM_BP_5	GO:0043038~amino acid activation	19	0.00211279	ENSMUSG00000030515, ENSMUSG00000026615, ENSMUSG00000024587, ENSMUSG00000018848, ENSMUSG00000026618, ENSMUSG00000037851, ENSMUSG00000028292, ENSMUSG00000032604, ENSMUSG00000021266, ENSMUSG00000019039, ENSMUSG00000006005, ENSMUSG00000068739, ENSMUSG00000005102, ENSMUSG00000031960, ENSMUSG00000024493, ENSMUSG00000026356, ENSMUSG00000007670, ENSMUSG00000010755, ENSMUSG00000040354	2.06893	3.59629	0.0359629
GOTERM_BP_5	GO:0006418~tRNA aminoacylation for protein translation	19	0.00211279	ENSMUSG00000030515, ENSMUSG00000026615, ENSMUSG00000024587, ENSMUSG00000018848, ENSMUSG00000026618, ENSMUSG00000037851, ENSMUSG00000028292, ENSMUSG00000032604, ENSMUSG00000021266, ENSMUSG00000019039, ENSMUSG00000006005, ENSMUSG00000068739, ENSMUSG00000005102, ENSMUSG00000031960, ENSMUSG00000024493, ENSMUSG00000026356, ENSMUSG00000007670, ENSMUSG00000010755, ENSMUSG00000040354	2.06893	3.59629	0.0359629
GOTERM_BP_5	GO:0032271~regulation of protein polymerization	22	0.00226904	ENSMUSG00000028991, ENSMUSG00000021061, ENSMUSG00000006304, ENSMUSG00000015733, ENSMUSG00000020476, ENSMUSG00000027479, ENSMUSG00000008475, ENSMUSG00000029465, ENSMUSG00000022770, ENSMUSG00000030707, ENSMUSG00000028832, ENSMUSG00000021549, ENSMUSG00000079523, ENSMUSG00000056367, ENSMUSG00000026879, ENSMUSG00000057738, ENSMUSG00000028745, ENSMUSG00000005871, ENSMUSG00000021573, ENSMUSG00000000416,…	1.93329	3.85735	0.0385735
GOTERM_BP_5	GO:0016458~gene silencing	22	0.00226904	ENSMUSG00000020661, ENSMUSG00000004099, ENSMUSG00000001424, ENSMUSG00000025138, ENSMUSG00000036698, ENSMUSG00000025571, ENSMUSG00000031167, ENSMUSG00000022774, ENSMUSG00000031527, ENSMUSG00000051910, ENSMUSG00000052707, ENSMUSG00000027951, ENSMUSG00000067150, ENSMUSG00000040054, ENSMUSG00000037364, ENSMUSG00000025486, ENSMUSG00000041530, ENSMUSG00000000743, ENSMUSG00000002731, ENSMUSG00000015461,…	1.93329	3.85735	0.0385735
GOTERM_BP_5	GO:0051493~regulation of cytoskeleton organization	33	0.00243526	ENSMUSG00000015222, ENSMUSG00000020476, ENSMUSG00000028059, ENSMUSG00000079523, ENSMUSG00000033392, ENSMUSG00000027254, ENSMUSG00000057738, ENSMUSG00000028745, ENSMUSG00000052727, ENSMUSG00000005871, ENSMUSG00000043079, ENSMUSG00000000416, ENSMUSG00000020315, ENSMUSG00000033004, ENSMUSG00000026131, ENSMUSG00000028991, ENSMUSG00000032740, ENSMUSG00000006304, ENSMUSG00000021061, ENSMUSG00000015733,…	1.66966	4.13433	0.0413433
GOTERM_BP_5	GO:0001578~microtubule bundle formation	10	0.00252225	ENSMUSG00000030397, ENSMUSG00000015222, ENSMUSG00000019996, ENSMUSG00000052727, ENSMUSG00000009418, ENSMUSG00000014846, ENSMUSG00000021573, ENSMUSG00000030276, ENSMUSG00000002031, ENSMUSG00000024068	2.94646	4.27901	0.0427901
GOTERM_BP_5	GO:0010629~negative regulation of gene expression	106	0.00274195	ENSMUSG00000040761, ENSMUSG00000018501, ENSMUSG00000038418, ENSMUSG00000052707, ENSMUSG00000049577, ENSMUSG00000025486, ENSMUSG00000000743, ENSMUSG00000030067, ENSMUSG00000027582, ENSMUSG00000022634, ENSMUSG00000036698, ENSMUSG00000022774, ENSMUSG00000051910, ENSMUSG00000001472, ENSMUSG00000009575, ENSMUSG00000029705, ENSMUSG00000004698, ENSMUSG00000026313, ENSMUSG00000022306, ENSMUSG00000037364,…	1.295	4.64344	0.0464344
GOTERM_BP_5	GO:0045454~cell redox homeostasis	23	0.0031139	ENSMUSG00000024583, ENSMUSG00000022763, ENSMUSG00000005161, ENSMUSG00000005354, ENSMUSG00000025130, ENSMUSG00000027006, ENSMUSG00000028843, ENSMUSG00000024997, ENSMUSG00000036327, ENSMUSG00000041571, ENSMUSG00000025408, ENSMUSG00000028567, ENSMUSG00000020250, ENSMUSG00000002580, ENSMUSG00000021830, ENSMUSG00000020571, ENSMUSG00000024953, ENSMUSG00000031068, ENSMUSG00000027248, ENSMUSG00000020664,…	1.85817	5.25745	0.0525745
GOTERM_BP_5	GO:0051028~mRNA transport	23	0.0031139	ENSMUSG00000025134, ENSMUSG00000062078, ENSMUSG00000034274, ENSMUSG00000003226, ENSMUSG00000022338, ENSMUSG00000078812, ENSMUSG00000022774, ENSMUSG00000053453, ENSMUSG00000038374, ENSMUSG00000029405, ENSMUSG00000028676, ENSMUSG00000010097, ENSMUSG00000000838, ENSMUSG00000052533, ENSMUSG00000040667, ENSMUSG00000022855, ENSMUSG00000024120, ENSMUSG00000039509, ENSMUSG00000078676, ENSMUSG00000007670,…	1.85817	5.25745	0.0525745
GOTERM_BP_5	GO:0051650~establishment of vesicle localization	8	0.00383442	ENSMUSG00000022568, ENSMUSG00000034593, ENSMUSG00000019969, ENSMUSG00000021248, ENSMUSG00000045180, ENSMUSG00000063887, ENSMUSG00000061601, ENSMUSG00000027596	3.33932	6.43628	0.0643628
GOTERM_BP_5	GO:0043414~biopolymer methylation	25	0.00427017	ENSMUSG00000004099, ENSMUSG00000002028, ENSMUSG00000020661, ENSMUSG00000030213, ENSMUSG00000003411, ENSMUSG00000019795, ENSMUSG00000024561, ENSMUSG00000013787, ENSMUSG00000021488, ENSMUSG00000079184, ENSMUSG00000062203, ENSMUSG00000028233, ENSMUSG00000030704, ENSMUSG00000024947, ENSMUSG00000029004, ENSMUSG00000060098, ENSMUSG00000030763, ENSMUSG00000040054, ENSMUSG00000023927, ENSMUSG00000038056,…	1.76373	7.14249	0.0714249
GOTERM_BP_5	GO:0007015~actin filament organization	21	0.00432562	ENSMUSG00000016382, ENSMUSG00000079426, ENSMUSG00000038976, ENSMUSG00000037902, ENSMUSG00000020476, ENSMUSG00000024456, ENSMUSG00000038729, ENSMUSG00000022770, ENSMUSG00000030707, ENSMUSG00000033066, ENSMUSG00000028059, ENSMUSG00000022995, ENSMUSG00000026879, ENSMUSG00000070047, ENSMUSG00000026596, ENSMUSG00000032827, ENSMUSG00000034675, ENSMUSG00000029684, ENSMUSG00000054808, ENSMUSG00000022353,…	1.87837	7.232	0.07232
GOTERM_BP_5	GO:0006413~translational initiation	16	0.00439509	ENSMUSG00000035150, ENSMUSG00000030738, ENSMUSG00000026254, ENSMUSG00000028683, ENSMUSG00000003235, ENSMUSG00000070319, ENSMUSG00000067194, ENSMUSG00000024991, ENSMUSG00000016554, ENSMUSG00000029145, ENSMUSG00000020459, ENSMUSG00000057561, ENSMUSG00000004788, ENSMUSG00000021282, ENSMUSG00000056076, ENSMUSG00000030068	2.10904	7.34401	0.0734401
GOTERM_BP_5	GO:0007420~brain development	77	0.00448861	ENSMUSG00000029478, ENSMUSG00000019874, ENSMUSG00000069171, ENSMUSG00000020745, ENSMUSG00000022842, ENSMUSG00000021557, ENSMUSG00000019777, ENSMUSG00000018501, ENSMUSG00000017485, ENSMUSG00000052516, ENSMUSG00000024639, ENSMUSG00000040481, ENSMUSG00000000416, ENSMUSG00000005069, ENSMUSG00000048799, ENSMUSG00000006464, ENSMUSG00000019971, ENSMUSG00000032187, ENSMUSG00000006932, ENSMUSG00000015733,…	1.33921	7.49462	0.0749462
GOTERM_BP_5	GO:0045749~negative regulation of S phase of mitotic cell cycle	6	0.00461269	ENSMUSG00000048787, ENSMUSG00000029207, ENSMUSG00000037032, ENSMUSG00000039057, ENSMUSG00000000743, ENSMUSG00000015461	4.29341	7.69407	0.0769407
GOTERM_BP_5	GO:0006376~mRNA splice site selection	6	0.00461269	ENSMUSG00000024268, ENSMUSG00000028134, ENSMUSG00000028676, ENSMUSG00000005506, ENSMUSG00000002107, ENSMUSG00000027763	4.29341	7.69407	0.0769407
GOTERM_BP_5	GO:0043242~negative regulation of protein complex disassembly	15	0.00508968	ENSMUSG00000015222, ENSMUSG00000021061, ENSMUSG00000015733, ENSMUSG00000020476, ENSMUSG00000028059, ENSMUSG00000033392, ENSMUSG00000027254, ENSMUSG00000026879, ENSMUSG00000057738, ENSMUSG00000052727, ENSMUSG00000028745, ENSMUSG00000005871, ENSMUSG00000022099, ENSMUSG00000045180, ENSMUSG00000020315	2.14671	8.45706	0.0845706
GOTERM_BP_5	GO:0007346~regulation of mitotic cell cycle	31	0.00567519	ENSMUSG00000022568, ENSMUSG00000037032, ENSMUSG00000070348, ENSMUSG00000018697, ENSMUSG00000030451, ENSMUSG00000040327, ENSMUSG00000035390, ENSMUSG00000005871, ENSMUSG00000039057, ENSMUSG00000040250, ENSMUSG00000000743, ENSMUSG00000022601, ENSMUSG00000033004, ENSMUSG00000066551, ENSMUSG00000055670, ENSMUSG00000029062, ENSMUSG00000048787, ENSMUSG00000024370, ENSMUSG00000022892, ENSMUSG00000027499,…	1.61748	9.3855	0.093855
GOTERM_BP_5	GO:0017148~negative regulation of translation	11	0.00599718	ENSMUSG00000052707, ENSMUSG00000029613, ENSMUSG00000031668, ENSMUSG00000036698, ENSMUSG00000003235, ENSMUSG00000071337, ENSMUSG00000005102, ENSMUSG00000041530, ENSMUSG00000037058, ENSMUSG00000024483, ENSMUSG00000009549	2.50449	9.8923	0.098923
GOTERM_CC_5	GO:0005737~cytoplasm	1783	3.57105e-80	ENSMUSG00000039361, ENSMUSG00000026254, ENSMUSG00000039367, ENSMUSG00000018501, ENSMUSG00000032503, ENSMUSG00000052707, ENSMUSG00000025484, ENSMUSG00000019978, ENSMUSG00000025487, ENSMUSG00000025486, ENSMUSG00000025485, ENSMUSG00000019971, ENSMUSG00000019578, ENSMUSG00000036698, ENSMUSG00000037805, ENSMUSG00000038302, ENSMUSG00000038914, ENSMUSG00000048175, ENSMUSG00000019969, ENSMUSG00000027305,…	1.3	5.15e-77	5.15e-79
GOTERM_CC_5	GO:0043229~intracellular organelle	2061	3.05636e-59	ENSMUSG00000002658, ENSMUSG00000039361, ENSMUSG00000039367, ENSMUSG00000042826, ENSMUSG00000018501, ENSMUSG00000042446, ENSMUSG00000025484, ENSMUSG00000019978, ENSMUSG00000001016, ENSMUSG00000003279, ENSMUSG00000025486, ENSMUSG00000067942, ENSMUSG00000019971, ENSMUSG00000019578, ENSMUSG00000036698, ENSMUSG00000037805, ENSMUSG00000025885, ENSMUSG00000038302, ENSMUSG00000038914, ENSMUSG00000006456,…		4.41e-56	4.41e-58
GOTERM_CC_5	GO:0044446~intracellular organelle part	953	1.03683e-46	ENSMUSG00000025204, ENSMUSG00000039367, ENSMUSG00000019777, ENSMUSG00000018501, ENSMUSG00000018707, ENSMUSG00000019370, ENSMUSG00000039176, ENSMUSG00000033066, ENSMUSG00000025484, ENSMUSG00000001016, ENSMUSG00000003279, ENSMUSG00000019971, ENSMUSG00000019578, ENSMUSG00000032786, ENSMUSG00000025885, ENSMUSG00000025607, ENSMUSG00000040048, ENSMUSG00000019373, ENSMUSG00000006456, ENSMUSG00000040040,…	1.45301	1.49723e-43	1.49723e-45
GOTERM_CC_5	GO:0043231~intracellular membrane-bounded organelle	1815	2.96452e-42	ENSMUSG00000002658, ENSMUSG00000039361, ENSMUSG00000039367, ENSMUSG00000042826, ENSMUSG00000018501, ENSMUSG00000042446, ENSMUSG00000025484, ENSMUSG00000001016, ENSMUSG00000025486, ENSMUSG00000067942, ENSMUSG00000019971, ENSMUSG00000019578, ENSMUSG00000036698, ENSMUSG00000037805, ENSMUSG00000038302, ENSMUSG00000038914, ENSMUSG00000006456, ENSMUSG00000042439, ENSMUSG00000019969, ENSMUSG00000027305,…		4.28e-39	4.28e-41
GOTERM_CC_5	GO:0044444~cytoplasmic part	1157	1.13541e-40	ENSMUSG00000033061, ENSMUSG00000039361, ENSMUSG00000025203, ENSMUSG00000025204, ENSMUSG00000039367, ENSMUSG00000033065, ENSMUSG00000039176, ENSMUSG00000052707, ENSMUSG00000046947, ENSMUSG00000025484, ENSMUSG00000025487, ENSMUSG00000025486, ENSMUSG00000025485, ENSMUSG00000027519, ENSMUSG00000019971, ENSMUSG00000030533, ENSMUSG00000030534, ENSMUSG00000019578, ENSMUSG00000025212, ENSMUSG00000032786,…	1.34664	1.63958e-37	1.63958e-39
GOTERM_CC_5	GO:0044428~nuclear part	396	3.10008e-23	ENSMUSG00000019777, ENSMUSG00000018501, ENSMUSG00000040824, ENSMUSG00000042308, ENSMUSG00000001016, ENSMUSG00000035297, ENSMUSG00000019373, ENSMUSG00000021500, ENSMUSG00000006456, ENSMUSG00000019969, ENSMUSG00000020708, ENSMUSG00000027304, ENSMUSG00000029599, ENSMUSG00000020705, ENSMUSG00000022255, ENSMUSG00000019961, ENSMUSG00000040463, ENSMUSG00000055116, ENSMUSG00000062627, ENSMUSG00000024240,…	1.55394	4.47667e-20	4.47667e-22
GOTERM_CC_5	GO:0030529~ribonucleoprotein complex	180	3.32812e-20	ENSMUSG00000032399, ENSMUSG00000032777, ENSMUSG00000032580, ENSMUSG00000025794, ENSMUSG00000039630, ENSMUSG00000071415, ENSMUSG00000001120, ENSMUSG00000027193, ENSMUSG00000062997, ENSMUSG00000025103, ENSMUSG00000037563, ENSMUSG00000052707, ENSMUSG00000040824, ENSMUSG00000000948, ENSMUSG00000059708, ENSMUSG00000025290, ENSMUSG00000042699, ENSMUSG00000022635, ENSMUSG00000003660, ENSMUSG00000036698,…	1.89732	4.80597e-17	4.80597e-19
GOTERM_CC_5	GO:0043232~intracellular non-membrane-bounded organelle	544	4.95921e-19	ENSMUSG00000024269, ENSMUSG00000025794, ENSMUSG00000019777, ENSMUSG00000028906, ENSMUSG00000035954, ENSMUSG00000018707, ENSMUSG00000019370, ENSMUSG00000033066, ENSMUSG00000029580, ENSMUSG00000039943, ENSMUSG00000003178, ENSMUSG00000019978, ENSMUSG00000029684, ENSMUSG00000001016, ENSMUSG00000003279, ENSMUSG00000019971, ENSMUSG00000019578, ENSMUSG00000028309, ENSMUSG00000075415, ENSMUSG00000024253,…	1.38049	7.16136e-16	7.16136e-18
GOTERM_CC_5	GO:0005634~nucleus	1065	1.11629e-15	ENSMUSG00000002658, ENSMUSG00000032777, ENSMUSG00000019775, ENSMUSG00000048756, ENSMUSG00000019777, ENSMUSG00000018501, ENSMUSG00000042826, ENSMUSG00000042446, ENSMUSG00000040033, ENSMUSG00000029684, ENSMUSG00000053581, ENSMUSG00000001016, ENSMUSG00000067942, ENSMUSG00000019971, ENSMUSG00000030533, ENSMUSG00000019578, ENSMUSG00000036698, ENSMUSG00000020114, ENSMUSG00000039166, ENSMUSG00000019373,…	1.20193	1.59872e-12	1.59872e-14
GOTERM_CC_5	GO:0031981~nuclear lumen	277	5.58918e-15	ENSMUSG00000000134, ENSMUSG00000019777, ENSMUSG00000001016, ENSMUSG00000042308, ENSMUSG00000059708, ENSMUSG00000042699, ENSMUSG00000022635, ENSMUSG00000004815, ENSMUSG00000022774, ENSMUSG00000009575, ENSMUSG00000062929, ENSMUSG00000021500, ENSMUSG00000006456, ENSMUSG00000047242, ENSMUSG00000020708, ENSMUSG00000027304, ENSMUSG00000020705, ENSMUSG00000036940, ENSMUSG00000029599, ENSMUSG00000022255,…	1.52767	8.01581e-12	8.01581e-14
GOTERM_CC_5	GO:0070013~intracellular organelle lumen	335	5.48791e-14	ENSMUSG00000000134, ENSMUSG00000019777, ENSMUSG00000039176, ENSMUSG00000042308, ENSMUSG00000001016, ENSMUSG00000059708, ENSMUSG00000049225, ENSMUSG00000042699, ENSMUSG00000022635, ENSMUSG00000004815, ENSMUSG00000032786, ENSMUSG00000022774, ENSMUSG00000009575, ENSMUSG00000062929, ENSMUSG00000021500, ENSMUSG00000006456, ENSMUSG00000026740, ENSMUSG00000047242, ENSMUSG00000020708, ENSMUSG00000027304,…	1.43988	7.92033e-11	7.92033e-13
GOTERM_CC_5	GO:0031410~cytoplasmic vesicle	176	7.56749e-14	ENSMUSG00000028249, ENSMUSG00000039361, ENSMUSG00000004319, ENSMUSG00000041268, ENSMUSG00000024261, ENSMUSG00000039367, ENSMUSG00000015656, ENSMUSG00000022842, ENSMUSG00000038696, ENSMUSG00000026944, ENSMUSG00000030731, ENSMUSG00000056429, ENSMUSG00000022957, ENSMUSG00000022841, ENSMUSG00000009394, ENSMUSG00000020571, ENSMUSG00000021314, ENSMUSG00000031788, ENSMUSG00000051984, ENSMUSG00000020986,…	1.68717	1.09335e-10	1.09335e-12
GOTERM_CC_5	GO:0005794~Golgi apparatus	221	1.18619e-13	ENSMUSG00000033061, ENSMUSG00000039361, ENSMUSG00000004319, ENSMUSG00000039367, ENSMUSG00000032252, ENSMUSG00000028700, ENSMUSG00000027255, ENSMUSG00000027455, ENSMUSG00000025484, ENSMUSG00000031788, ENSMUSG00000034040, ENSMUSG00000021124, ENSMUSG00000006651, ENSMUSG00000039959, ENSMUSG00000025607, ENSMUSG00000062234, ENSMUSG00000019969, ENSMUSG00000039953, ENSMUSG00000021130, ENSMUSG00000025499,…	1.57804	1.71219e-10	1.71219e-12
GOTERM_CC_5	GO:0019898~extrinsic to membrane	164	4.43892e-13	ENSMUSG00000024969, ENSMUSG00000028249, ENSMUSG00000038388, ENSMUSG00000041670, ENSMUSG00000025793, ENSMUSG00000043940, ENSMUSG00000022456, ENSMUSG00000041268, ENSMUSG00000020375, ENSMUSG00000028906, ENSMUSG00000020886, ENSMUSG00000056629, ENSMUSG00000035954, ENSMUSG00000038696, ENSMUSG00000020078, ENSMUSG00000024639, ENSMUSG00000029713, ENSMUSG00000042388, ENSMUSG00000022789, ENSMUSG00000047250,…	1.69205	6.40965e-10	6.40965e-12
GOTERM_CC_5	GO:0044431~Golgi apparatus part	93	3.59891e-12	ENSMUSG00000036273, ENSMUSG00000040276, ENSMUSG00000039037, ENSMUSG00000040722, ENSMUSG00000039367, ENSMUSG00000022842, ENSMUSG00000028700, ENSMUSG00000041720, ENSMUSG00000027489, ENSMUSG00000005899, ENSMUSG00000056429, ENSMUSG00000026577, ENSMUSG00000020740, ENSMUSG00000027455, ENSMUSG00000025484, ENSMUSG00000026470, ENSMUSG00000006800, ENSMUSG00000001052, ENSMUSG00000079317, ENSMUSG00000032482,…	1.99511	5.19699e-09	5.19699e-11
GOTERM_CC_5	GO:0015630~microtubule cytoskeleton	155	4.50139e-12	ENSMUSG00000024269, ENSMUSG00000018707, ENSMUSG00000023764, ENSMUSG00000026944, ENSMUSG00000019370, ENSMUSG00000028059, ENSMUSG00000028649, ENSMUSG00000030397, ENSMUSG00000066306, ENSMUSG00000027254, ENSMUSG00000036438, ENSMUSG00000028849, ENSMUSG00000025920, ENSMUSG00000028447, ENSMUSG00000000743, ENSMUSG00000031788, ENSMUSG00000035437, ENSMUSG00000062380, ENSMUSG00000021597, ENSMUSG00000019971,…	1.67737	6.50024e-09	6.50024e-11
GOTERM_CC_5	GO:0005856~cytoskeleton	323	6.94051e-12	ENSMUSG00000024269, ENSMUSG00000051586, ENSMUSG00000028906, ENSMUSG00000018707, ENSMUSG00000023764, ENSMUSG00000019370, ENSMUSG00000033066, ENSMUSG00000030397, ENSMUSG00000029580, ENSMUSG00000039943, ENSMUSG00000027254, ENSMUSG00000003178, ENSMUSG00000036438, ENSMUSG00000019978, ENSMUSG00000029684, ENSMUSG00000003279, ENSMUSG00000031788, ENSMUSG00000035437, ENSMUSG00000062380, ENSMUSG00000019971,…	1.40191	1.00225e-08	1.00225e-10
GOTERM_CC_5	GO:0005681~spliceosome	60	1.25106e-11	ENSMUSG00000040383, ENSMUSG00000021413, ENSMUSG00000032580, ENSMUSG00000074088, ENSMUSG00000028809, ENSMUSG00000027193, ENSMUSG00000027014, ENSMUSG00000040824, ENSMUSG00000023932, ENSMUSG00000059208, ENSMUSG00000059005, ENSMUSG00000016018, ENSMUSG00000033732, ENSMUSG00000059708, ENSMUSG00000005687, ENSMUSG00000021039, ENSMUSG00000028945, ENSMUSG00000022635, ENSMUSG00000020180, ENSMUSG00000030224,…	2.35635	1.8066e-08	1.8066e-10
GOTERM_CC_5	GO:0005829~cytosol	178	3.52589e-11	ENSMUSG00000071866, ENSMUSG00000036769, ENSMUSG00000020375, ENSMUSG00000015656, ENSMUSG00000033065, ENSMUSG00000020078, ENSMUSG00000001127, ENSMUSG00000029580, ENSMUSG00000027254, ENSMUSG00000022789, ENSMUSG00000025487, ENSMUSG00000025485, ENSMUSG00000032301, ENSMUSG00000035437, ENSMUSG00000025290, ENSMUSG00000019971, ENSMUSG00000013523, ENSMUSG00000039431, ENSMUSG00000049044, ENSMUSG00000001525,…	1.57891	5.09156e-08	5.09156e-10
GOTERM_CC_5	GO:0005654~nucleoplasm	188	2.02232e-10	ENSMUSG00000024563, ENSMUSG00000000134, ENSMUSG00000024561, ENSMUSG00000028248, ENSMUSG00000031311, ENSMUSG00000019777, ENSMUSG00000026439, ENSMUSG00000029238, ENSMUSG00000031314, ENSMUSG00000042308, ENSMUSG00000059708, ENSMUSG00000038612, ENSMUSG00000034245, ENSMUSG00000004815, ENSMUSG00000022635, ENSMUSG00000022774, ENSMUSG00000038374, ENSMUSG00000051910, ENSMUSG00000006728, ENSMUSG00000021639,…	1.52841	2.92034e-07	2.92034e-09
GOTERM_CC_5	GO:0009898~internal side of plasma membrane	105	3.85521e-10	ENSMUSG00000019428, ENSMUSG00000031442, ENSMUSG00000043940, ENSMUSG00000025793, ENSMUSG00000047842, ENSMUSG00000020886, ENSMUSG00000027255, ENSMUSG00000021823, ENSMUSG00000022841, ENSMUSG00000021314, ENSMUSG00000020671, ENSMUSG00000051984, ENSMUSG00000021139, ENSMUSG00000030534, ENSMUSG00000021062, ENSMUSG00000028975, ENSMUSG00000030058, ENSMUSG00000075415, ENSMUSG00000030265, ENSMUSG00000054855,…	1.78163	5.56711e-07	5.56711e-09
GOTERM_CC_5	GO:0005874~microtubule	91	7.99473e-10	ENSMUSG00000024269, ENSMUSG00000027012, ENSMUSG00000020745, ENSMUSG00000018707, ENSMUSG00000074657, ENSMUSG00000028059, ENSMUSG00000066306, ENSMUSG00000027254, ENSMUSG00000025920, ENSMUSG00000029757, ENSMUSG00000031788, ENSMUSG00000031922, ENSMUSG00000062380, ENSMUSG00000020483, ENSMUSG00000029166, ENSMUSG00000001525, ENSMUSG00000020687, ENSMUSG00000024253, ENSMUSG00000031176, ENSMUSG00000035770,…	1.84646	1.15448e-06	1.15448e-08
GOTERM_CC_5	GO:0016023~cytoplasmic membrane-bounded vesicle	138	9.12676e-10	ENSMUSG00000028249, ENSMUSG00000039361, ENSMUSG00000041268, ENSMUSG00000024261, ENSMUSG00000039367, ENSMUSG00000015656, ENSMUSG00000022842, ENSMUSG00000038696, ENSMUSG00000026944, ENSMUSG00000030731, ENSMUSG00000056429, ENSMUSG00000022957, ENSMUSG00000022841, ENSMUSG00000009394, ENSMUSG00000020571, ENSMUSG00000021314, ENSMUSG00000020986, ENSMUSG00000030058, ENSMUSG00000075415, ENSMUSG00000034813,…	1.62326	1.31795e-06	1.31795e-08
GOTERM_CC_5	GO:0030054~cell junction	151	2.53221e-09	ENSMUSG00000033060, ENSMUSG00000001986, ENSMUSG00000041670, ENSMUSG00000022456, ENSMUSG00000041268, ENSMUSG00000024261, ENSMUSG00000025892, ENSMUSG00000020886, ENSMUSG00000054728, ENSMUSG00000028059, ENSMUSG00000024462, ENSMUSG00000030731, ENSMUSG00000027457, ENSMUSG00000042388, ENSMUSG00000022957, ENSMUSG00000019820, ENSMUSG00000021823, ENSMUSG00000009394, ENSMUSG00000021314, ENSMUSG00000003279,…	1.56455	3.65664e-06	3.65664e-08
GOTERM_CC_5	GO:0048471~perinuclear region of cytoplasm	75	2.86849e-09	ENSMUSG00000036769, ENSMUSG00000060675, ENSMUSG00000018340, ENSMUSG00000020745, ENSMUSG00000024261, ENSMUSG00000020074, ENSMUSG00000075376, ENSMUSG00000074657, ENSMUSG00000029131, ENSMUSG00000036371, ENSMUSG00000052707, ENSMUSG00000029713, ENSMUSG00000079317, ENSMUSG00000029757, ENSMUSG00000028447, ENSMUSG00000004961, ENSMUSG00000020986, ENSMUSG00000021139, ENSMUSG00000030533, ENSMUSG00000039713,…	1.93246	4.14224e-06	4.14224e-08
GOTERM_CC_5	GO:0030425~dendrite	51	3.25301e-09	ENSMUSG00000038084, ENSMUSG00000001986, ENSMUSG00000031012, ENSMUSG00000028059, ENSMUSG00000066306, ENSMUSG00000039943, ENSMUSG00000059003, ENSMUSG00000036766, ENSMUSG00000028402, ENSMUSG00000026782, ENSMUSG00000022204, ENSMUSG00000036306, ENSMUSG00000027184, ENSMUSG00000058589, ENSMUSG00000020900, ENSMUSG00000032076, ENSMUSG00000023033, ENSMUSG00000022212, ENSMUSG00000053310, ENSMUSG00000019969,…	2.25781	4.69752e-06	4.69752e-08
GOTERM_CC_5	GO:0030424~axon	50	3.42479e-09	ENSMUSG00000025969, ENSMUSG00000020598, ENSMUSG00000022762, ENSMUSG00000075318, ENSMUSG00000030739, ENSMUSG00000023169, ENSMUSG00000017167, ENSMUSG00000041607, ENSMUSG00000052516, ENSMUSG00000066151, ENSMUSG00000064329, ENSMUSG00000004113, ENSMUSG00000062661, ENSMUSG00000005871, ENSMUSG00000063063, ENSMUSG00000033004, ENSMUSG00000021288, ENSMUSG00000062380, ENSMUSG00000027130, ENSMUSG00000031391,…	2.2756	4.94558e-06	4.94558e-08
GOTERM_CC_5	GO:0030135~coated vesicle	55	5.14767e-09	ENSMUSG00000039361, ENSMUSG00000040276, ENSMUSG00000036273, ENSMUSG00000017978, ENSMUSG00000040722, ENSMUSG00000024261, ENSMUSG00000041268, ENSMUSG00000039367, ENSMUSG00000030731, ENSMUSG00000056429, ENSMUSG00000009394, ENSMUSG00000001052, ENSMUSG00000021314, ENSMUSG00000020986, ENSMUSG00000004961, ENSMUSG00000030058, ENSMUSG00000006169, ENSMUSG00000072214, ENSMUSG00000026878, ENSMUSG00000025607,…	2.15999	7.43349e-06	7.43349e-08
GOTERM_CC_5	GO:0030117~membrane coat	33	6.39826e-09	ENSMUSG00000002957, ENSMUSG00000039361, ENSMUSG00000020198, ENSMUSG00000021686, ENSMUSG00000039367, ENSMUSG00000063801, ENSMUSG00000047547, ENSMUSG00000055681, ENSMUSG00000004849, ENSMUSG00000020740, ENSMUSG00000060279, ENSMUSG00000021824, ENSMUSG00000024941, ENSMUSG00000022841, ENSMUSG00000022973, ENSMUSG00000001052, ENSMUSG00000026825, ENSMUSG00000028923, ENSMUSG00000009090, ENSMUSG00000026553,…	2.77074	9.23942e-06	9.23942e-08
GOTERM_CC_5	GO:0044451~nucleoplasm part	160	8.37203e-09	ENSMUSG00000024563, ENSMUSG00000000134, ENSMUSG00000024561, ENSMUSG00000028248, ENSMUSG00000031311, ENSMUSG00000019777, ENSMUSG00000026439, ENSMUSG00000029238, ENSMUSG00000031314, ENSMUSG00000042308, ENSMUSG00000059708, ENSMUSG00000034245, ENSMUSG00000004815, ENSMUSG00000038374, ENSMUSG00000051910, ENSMUSG00000006728, ENSMUSG00000021639, ENSMUSG00000028233, ENSMUSG00000009575, ENSMUSG00000024454,…	1.51884	1.20896e-05	1.20896e-07
GOTERM_CC_5	GO:0014069~postsynaptic density	30	1.30091e-08	ENSMUSG00000001986, ENSMUSG00000022623, ENSMUSG00000007617, ENSMUSG00000041444, ENSMUSG00000020886, ENSMUSG00000024083, ENSMUSG00000042388, ENSMUSG00000039943, ENSMUSG00000059003, ENSMUSG00000062661, ENSMUSG00000043079, ENSMUSG00000003279, ENSMUSG00000063887, ENSMUSG00000068206, ENSMUSG00000028402, ENSMUSG00000052572, ENSMUSG00000078484, ENSMUSG00000030102, ENSMUSG00000033981, ENSMUSG00000036306,…	2.86458	1.87858e-05	1.87858e-07
GOTERM_CC_5	GO:0044430~cytoskeletal part	223	1.75087e-08	ENSMUSG00000024269, ENSMUSG00000018707, ENSMUSG00000023764, ENSMUSG00000019370, ENSMUSG00000033066, ENSMUSG00000030397, ENSMUSG00000039943, ENSMUSG00000027254, ENSMUSG00000036438, ENSMUSG00000003279, ENSMUSG00000031788, ENSMUSG00000035437, ENSMUSG00000062380, ENSMUSG00000019971, ENSMUSG00000029166, ENSMUSG00000001525, ENSMUSG00000019578, ENSMUSG00000024253, ENSMUSG00000025885, ENSMUSG00000022770,…	1.40305	2.52835e-05	2.52835e-07
GOTERM_CC_5	GO:0031967~organelle envelope	164	4.08248e-08	ENSMUSG00000028246, ENSMUSG00000019428, ENSMUSG00000037916, ENSMUSG00000025968, ENSMUSG00000000131, ENSMUSG00000029433, ENSMUSG00000050856, ENSMUSG00000043940, ENSMUSG00000058076, ENSMUSG00000025204, ENSMUSG00000020074, ENSMUSG00000042590, ENSMUSG00000030451, ENSMUSG00000039176, ENSMUSG00000064341, ENSMUSG00000021929, ENSMUSG00000026198, ENSMUSG00000002346, ENSMUSG00000018574, ENSMUSG00000022437,…	1.47897	5.89531e-05	5.89531e-07
GOTERM_CC_5	GO:0005768~endosome	89	6.2556e-08	ENSMUSG00000017288, ENSMUSG00000004319, ENSMUSG00000003948, ENSMUSG00000036769, ENSMUSG00000019210, ENSMUSG00000025793, ENSMUSG00000060126, ENSMUSG00000020375, ENSMUSG00000040722, ENSMUSG00000019173, ENSMUSG00000020078, ENSMUSG00000050812, ENSMUSG00000066151, ENSMUSG00000020740, ENSMUSG00000033379, ENSMUSG00000028788, ENSMUSG00000000743, ENSMUSG00000027519, ENSMUSG00000009907, ENSMUSG00000004961,…	1.71989	9.0334e-05	9.0334e-07
GOTERM_CC_5	GO:0005802~trans-Golgi network	26	7.37484e-07	ENSMUSG00000040276, ENSMUSG00000036273, ENSMUSG00000020198, ENSMUSG00000021686, ENSMUSG00000022842, ENSMUSG00000063801, ENSMUSG00000004849, ENSMUSG00000026754, ENSMUSG00000005899, ENSMUSG00000056429, ENSMUSG00000020740, ENSMUSG00000016664, ENSMUSG00000026470, ENSMUSG00000028080, ENSMUSG00000033792, ENSMUSG00000021687, ENSMUSG00000027273, ENSMUSG00000009090, ENSMUSG00000031889, ENSMUSG00000032570,…	2.69393	0.00106496	1.06496e-05
GOTERM_CC_5	GO:0016585~chromatin remodeling complex	27	7.92322e-07	ENSMUSG00000029478, ENSMUSG00000018474, ENSMUSG00000019777, ENSMUSG00000062627, ENSMUSG00000063049, ENSMUSG00000024921, ENSMUSG00000057236, ENSMUSG00000031060, ENSMUSG00000040054, ENSMUSG00000038331, ENSMUSG00000029712, ENSMUSG00000032481, ENSMUSG00000034245, ENSMUSG00000031353, ENSMUSG00000008855, ENSMUSG00000032187, ENSMUSG00000002748, ENSMUSG00000062270, ENSMUSG00000058318, ENSMUSG00000066900,…	2.62969	0.00114415	1.14415e-05
GOTERM_CC_5	GO:0016604~nuclear body	55	1.12781e-06	ENSMUSG00000029478, ENSMUSG00000028248, ENSMUSG00000024561, ENSMUSG00000030216, ENSMUSG00000031311, ENSMUSG00000031403, ENSMUSG00000028809, ENSMUSG00000028676, ENSMUSG00000029474, ENSMUSG00000000787, ENSMUSG00000023932, ENSMUSG00000032405, ENSMUSG00000059708, ENSMUSG00000004815, ENSMUSG00000011751, ENSMUSG00000030016, ENSMUSG00000038374, ENSMUSG00000028233, ENSMUSG00000021938, ENSMUSG00000031754,…	1.88619	0.00162861	1.62861e-05
GOTERM_CC_5	GO:0005624~membrane fraction	150	1.33235e-06	ENSMUSG00000001986, ENSMUSG00000048756, ENSMUSG00000022456, ENSMUSG00000028700, ENSMUSG00000020886, ENSMUSG00000001467, ENSMUSG00000007440, ENSMUSG00000022594, ENSMUSG00000034101, ENSMUSG00000024639, ENSMUSG00000027457, ENSMUSG00000023021, ENSMUSG00000039943, ENSMUSG00000022957, ENSMUSG00000047250, ENSMUSG00000073422, ENSMUSG00000031391, ENSMUSG00000039431, ENSMUSG00000040249, ENSMUSG00000033161,…	1.43229	0.00192397	1.92397e-05
GOTERM_CC_5	GO:0005783~endoplasmic reticulum	228	1.62259e-06	ENSMUSG00000038822, ENSMUSG00000033061, ENSMUSG00000025203, ENSMUSG00000029780, ENSMUSG00000020260, ENSMUSG00000039943, ENSMUSG00000047250, ENSMUSG00000051984, ENSMUSG00000027642, ENSMUSG00000034813, ENSMUSG00000048578, ENSMUSG00000022770, ENSMUSG00000026740, ENSMUSG00000003363, ENSMUSG00000019969, ENSMUSG00000021273, ENSMUSG00000039953, ENSMUSG00000062372, ENSMUSG00000003161, ENSMUSG00000027248,…	1.32495	0.00234308	2.34308e-05
GOTERM_CC_5	GO:0005938~cell cortex	50	1.64059e-06	ENSMUSG00000024969, ENSMUSG00000020476, ENSMUSG00000022456, ENSMUSG00000031543, ENSMUSG00000028906, ENSMUSG00000067889, ENSMUSG00000028649, ENSMUSG00000029580, ENSMUSG00000021357, ENSMUSG00000019820, ENSMUSG00000028745, ENSMUSG00000031068, ENSMUSG00000025656, ENSMUSG00000011751, ENSMUSG00000021061, ENSMUSG00000022443, ENSMUSG00000015733, ENSMUSG00000020486, ENSMUSG00000075415, ENSMUSG00000072214,…	1.93246	0.00236907	2.36907e-05
GOTERM_CC_5	GO:0044448~cell cortex part	34	1.73517e-06	ENSMUSG00000026276, ENSMUSG00000038366, ENSMUSG00000024969, ENSMUSG00000022456, ENSMUSG00000031543, ENSMUSG00000028906, ENSMUSG00000029763, ENSMUSG00000067889, ENSMUSG00000050379, ENSMUSG00000029580, ENSMUSG00000021357, ENSMUSG00000027940, ENSMUSG00000019820, ENSMUSG00000057738, ENSMUSG00000028745, ENSMUSG00000020315, ENSMUSG00000038976, ENSMUSG00000011751, ENSMUSG00000021061, ENSMUSG00000022443,…	2.26812	0.00250564	2.50564e-05
GOTERM_CC_5	GO:0043197~dendritic spine	18	1.95931e-06	ENSMUSG00000041556, ENSMUSG00000038976, ENSMUSG00000001986, ENSMUSG00000041444, ENSMUSG00000023017, ENSMUSG00000033981, ENSMUSG00000036306, ENSMUSG00000058589, ENSMUSG00000020900, ENSMUSG00000059003, ENSMUSG00000053310, ENSMUSG00000026959, ENSMUSG00000032827, ENSMUSG00000043079, ENSMUSG00000026024, ENSMUSG00000003974, ENSMUSG00000029361, ENSMUSG00000005089	3.24653	0.00282931	2.82931e-05
GOTERM_CC_5	GO:0012506~vesicle membrane	40	7.25006e-06	ENSMUSG00000024403, ENSMUSG00000004319, ENSMUSG00000025949, ENSMUSG00000039367, ENSMUSG00000021248, ENSMUSG00000022842, ENSMUSG00000047547, ENSMUSG00000041720, ENSMUSG00000055681, ENSMUSG00000004849, ENSMUSG00000035392, ENSMUSG00000024941, ENSMUSG00000009394, ENSMUSG00000001052, ENSMUSG00000000416, ENSMUSG00000021687, ENSMUSG00000032482, ENSMUSG00000028923, ENSMUSG00000026553, ENSMUSG00000020986,…	2.00816	0.0104689	0.000104689
GOTERM_CC_5	GO:0005905~coated pit	19	9.46365e-06	ENSMUSG00000040249, ENSMUSG00000002957, ENSMUSG00000033577, ENSMUSG00000035152, ENSMUSG00000039361, ENSMUSG00000022892, ENSMUSG00000047547, ENSMUSG00000024924, ENSMUSG00000004849, ENSMUSG00000000915, ENSMUSG00000006276, ENSMUSG00000060279, ENSMUSG00000028478, ENSMUSG00000047126, ENSMUSG00000022841, ENSMUSG00000033419, ENSMUSG00000057230, ENSMUSG00000030327, ENSMUSG00000035203	2.89144	0.0136651	0.000136651
GOTERM_CC_5	GO:0015629~actin cytoskeleton	69	1.40442e-05	ENSMUSG00000022451, ENSMUSG00000029095, ENSMUSG00000030739, ENSMUSG00000029516, ENSMUSG00000028906, ENSMUSG00000033066, ENSMUSG00000067889, ENSMUSG00000066151, ENSMUSG00000028649, ENSMUSG00000043733, ENSMUSG00000022995, ENSMUSG00000019820, ENSMUSG00000021823, ENSMUSG00000038453, ENSMUSG00000028745, ENSMUSG00000019978, ENSMUSG00000034675, ENSMUSG00000000416, ENSMUSG00000029684, ENSMUSG00000028447,…	1.6391	0.0202786	0.000202786
GOTERM_CC_5	GO:0005840~ribosome	65	2.08747e-05	ENSMUSG00000032399, ENSMUSG00000025794, ENSMUSG00000071415, ENSMUSG00000062997, ENSMUSG00000037563, ENSMUSG00000059291, ENSMUSG00000032215, ENSMUSG00000029066, ENSMUSG00000022601, ENSMUSG00000023723, ENSMUSG00000025290, ENSMUSG00000036850, ENSMUSG00000028936, ENSMUSG00000058546, ENSMUSG00000037772, ENSMUSG00000023967, ENSMUSG00000037805, ENSMUSG00000024608, ENSMUSG00000030744, ENSMUSG00000030706,…	1.64863	0.0301399	0.000301399
GOTERM_CC_5	GO:0005740~mitochondrial envelope	115	2.50575e-05	ENSMUSG00000028246, ENSMUSG00000019428, ENSMUSG00000037916, ENSMUSG00000025968, ENSMUSG00000050856, ENSMUSG00000029433, ENSMUSG00000025204, ENSMUSG00000058076, ENSMUSG00000030451, ENSMUSG00000039176, ENSMUSG00000064341, ENSMUSG00000026198, ENSMUSG00000002346, ENSMUSG00000018574, ENSMUSG00000022437, ENSMUSG00000015357, ENSMUSG00000073422, ENSMUSG00000032047, ENSMUSG00000021139, ENSMUSG00000029916,…	1.43229	0.0361782	0.000361782
GOTERM_CC_5	GO:0030118~clathrin coat	19	2.89183e-05	ENSMUSG00000002957, ENSMUSG00000035152, ENSMUSG00000039361, ENSMUSG00000031539, ENSMUSG00000047547, ENSMUSG00000032096, ENSMUSG00000004849, ENSMUSG00000021824, ENSMUSG00000060279, ENSMUSG00000020740, ENSMUSG00000028478, ENSMUSG00000047126, ENSMUSG00000022841, ENSMUSG00000022973, ENSMUSG00000033419, ENSMUSG00000030327, ENSMUSG00000033128, ENSMUSG00000028923, ENSMUSG00000009090	2.72135	0.0417513	0.000417513
GOTERM_CC_5	GO:0031966~mitochondrial membrane	109	3.00086e-05	ENSMUSG00000028246, ENSMUSG00000037916, ENSMUSG00000025968, ENSMUSG00000050856, ENSMUSG00000025204, ENSMUSG00000058076, ENSMUSG00000030451, ENSMUSG00000039176, ENSMUSG00000064341, ENSMUSG00000026198, ENSMUSG00000002346, ENSMUSG00000018574, ENSMUSG00000022437, ENSMUSG00000015357, ENSMUSG00000032047, ENSMUSG00000021139, ENSMUSG00000029916, ENSMUSG00000062580, ENSMUSG00000020402, ENSMUSG00000025781,…	1.44241	0.0433252	0.000433252
GOTERM_CC_5	GO:0030662~coated vesicle membrane	25	4.24668e-05	ENSMUSG00000024403, ENSMUSG00000039367, ENSMUSG00000047547, ENSMUSG00000055681, ENSMUSG00000004849, ENSMUSG00000035392, ENSMUSG00000024941, ENSMUSG00000009394, ENSMUSG00000021687, ENSMUSG00000001052, ENSMUSG00000028923, ENSMUSG00000026553, ENSMUSG00000020986, ENSMUSG00000031889, ENSMUSG00000030058, ENSMUSG00000032458, ENSMUSG00000033981, ENSMUSG00000039959, ENSMUSG00000025607, ENSMUSG00000026787,…	2.29707	0.0613068	0.000613068
GOTERM_CC_5	GO:0000118~histone deacetylase complex	18	4.54809e-05	ENSMUSG00000029478, ENSMUSG00000062270, ENSMUSG00000058318, ENSMUSG00000018474, ENSMUSG00000019777, ENSMUSG00000063049, ENSMUSG00000066900, ENSMUSG00000024454, ENSMUSG00000009575, ENSMUSG00000057236, ENSMUSG00000026313, ENSMUSG00000004698, ENSMUSG00000039852, ENSMUSG00000038331, ENSMUSG00000071646, ENSMUSG00000031353, ENSMUSG00000034245, ENSMUSG00000008855	2.73926	0.0656566	0.000656566
GOTERM_CC_5	GO:0030659~cytoplasmic vesicle membrane	35	5.46708e-05	ENSMUSG00000024403, ENSMUSG00000039367, ENSMUSG00000021248, ENSMUSG00000022842, ENSMUSG00000047547, ENSMUSG00000041720, ENSMUSG00000055681, ENSMUSG00000004849, ENSMUSG00000035392, ENSMUSG00000024941, ENSMUSG00000009394, ENSMUSG00000001052, ENSMUSG00000000416, ENSMUSG00000021687, ENSMUSG00000032482, ENSMUSG00000028923, ENSMUSG00000026553, ENSMUSG00000020986, ENSMUSG00000031889, ENSMUSG00000030058,…	1.95911	0.0789184	0.000789184
GOTERM_CC_5	GO:0044433~cytoplasmic vesicle part	37	7.17292e-05	ENSMUSG00000024403, ENSMUSG00000039367, ENSMUSG00000021248, ENSMUSG00000022842, ENSMUSG00000047547, ENSMUSG00000041720, ENSMUSG00000055681, ENSMUSG00000004849, ENSMUSG00000035392, ENSMUSG00000024941, ENSMUSG00000009394, ENSMUSG00000001052, ENSMUSG00000000416, ENSMUSG00000021687, ENSMUSG00000032482, ENSMUSG00000028923, ENSMUSG00000026553, ENSMUSG00000020986, ENSMUSG00000031889, ENSMUSG00000030058,…	1.89665	0.103531	0.00103531
GOTERM_CC_5	GO:0005815~microtubule organizing center	62	9.29003e-05	ENSMUSG00000020745, ENSMUSG00000023764, ENSMUSG00000026944, ENSMUSG00000050812, ENSMUSG00000044066, ENSMUSG00000030397, ENSMUSG00000028447, ENSMUSG00000000743, ENSMUSG00000035437, ENSMUSG00000031922, ENSMUSG00000048799, ENSMUSG00000032118, ENSMUSG00000021597, ENSMUSG00000019971, ENSMUSG00000031347, ENSMUSG00000019578, ENSMUSG00000021870, ENSMUSG00000020687, ENSMUSG00000021068, ENSMUSG00000031592,…	1.5975	0.134069	0.00134069
GOTERM_CC_5	GO:0005743~mitochondrial inner membrane	89	9.59806e-05	ENSMUSG00000037916, ENSMUSG00000027010, ENSMUSG00000025968, ENSMUSG00000005510, ENSMUSG00000038084, ENSMUSG00000004264, ENSMUSG00000020022, ENSMUSG00000050856, ENSMUSG00000003438, ENSMUSG00000025204, ENSMUSG00000058076, ENSMUSG00000030451, ENSMUSG00000039176, ENSMUSG00000064341, ENSMUSG00000002416, ENSMUSG00000002346, ENSMUSG00000018574, ENSMUSG00000024012, ENSMUSG00000022437, ENSMUSG00000015357,…	1.46423	0.138512	0.00138512
GOTERM_CC_5	GO:0005643~nuclear pore	26	0.000113338	ENSMUSG00000003226, ENSMUSG00000000131, ENSMUSG00000001440, ENSMUSG00000042590, ENSMUSG00000021929, ENSMUSG00000030662, ENSMUSG00000018362, ENSMUSG00000027782, ENSMUSG00000057322, ENSMUSG00000078812, ENSMUSG00000009470, ENSMUSG00000003731, ENSMUSG00000041879, ENSMUSG00000010097, ENSMUSG00000002319, ENSMUSG00000022905, ENSMUSG00000052533, ENSMUSG00000040667, ENSMUSG00000006005, ENSMUSG00000002718,…	2.14601	0.163541	0.00163541
GOTERM_CC_5	GO:0000139~Golgi membrane	48	0.000114394	ENSMUSG00000074582, ENSMUSG00000008153, ENSMUSG00000039037, ENSMUSG00000041444, ENSMUSG00000040722, ENSMUSG00000028700, ENSMUSG00000047547, ENSMUSG00000041720, ENSMUSG00000055681, ENSMUSG00000004849, ENSMUSG00000003316, ENSMUSG00000024941, ENSMUSG00000025484, ENSMUSG00000045503, ENSMUSG00000032482, ENSMUSG00000026553, ENSMUSG00000020986, ENSMUSG00000030059, ENSMUSG00000022159, ENSMUSG00000030058,…	1.7062	0.165064	0.00165064
GOTERM_CC_5	GO:0030863~cortical cytoskeleton	21	0.000115418	ENSMUSG00000038366, ENSMUSG00000038976, ENSMUSG00000011751, ENSMUSG00000021061, ENSMUSG00000022443, ENSMUSG00000015733, ENSMUSG00000031543, ENSMUSG00000028906, ENSMUSG00000027479, ENSMUSG00000067889, ENSMUSG00000029580, ENSMUSG00000027940, ENSMUSG00000028656, ENSMUSG00000019820, ENSMUSG00000057738, ENSMUSG00000032827, ENSMUSG00000028745, ENSMUSG00000054808, ENSMUSG00000022099, ENSMUSG00000045180,…	2.37827	0.16654	0.0016654
GOTERM_CC_5	GO:0005875~microtubule associated complex	31	0.000118689	ENSMUSG00000015222, ENSMUSG00000027012, ENSMUSG00000020745, ENSMUSG00000018707, ENSMUSG00000078762, ENSMUSG00000074657, ENSMUSG00000027254, ENSMUSG00000052727, ENSMUSG00000029757, ENSMUSG00000028447, ENSMUSG00000031788, ENSMUSG00000021288, ENSMUSG00000020483, ENSMUSG00000022420, ENSMUSG00000026280, ENSMUSG00000031176, ENSMUSG00000024253, ENSMUSG00000035770, ENSMUSG00000025410, ENSMUSG00000031865,…	1.98636	0.171256	0.00171256
GOTERM_CC_5	GO:0005730~nucleolus	92	0.000121726	ENSMUSG00000030980, ENSMUSG00000033931, ENSMUSG00000024561, ENSMUSG00000079470, ENSMUSG00000030216, ENSMUSG00000074457, ENSMUSG00000004100, ENSMUSG00000031403, ENSMUSG00000043535, ENSMUSG00000071415, ENSMUSG00000017485, ENSMUSG00000020430, ENSMUSG00000000581, ENSMUSG00000032215, ENSMUSG00000016018, ENSMUSG00000041923, ENSMUSG00000025920, ENSMUSG00000001016, ENSMUSG00000005687, ENSMUSG00000021595,…	1.44523	0.175635	0.00175635
GOTERM_CC_5	GO:0046930~pore complex	30	0.00013414	ENSMUSG00000003226, ENSMUSG00000005674, ENSMUSG00000000131, ENSMUSG00000001440, ENSMUSG00000042590, ENSMUSG00000021929, ENSMUSG00000030662, ENSMUSG00000018362, ENSMUSG00000027782, ENSMUSG00000008892, ENSMUSG00000057322, ENSMUSG00000021771, ENSMUSG00000078812, ENSMUSG00000020402, ENSMUSG00000009470, ENSMUSG00000003731, ENSMUSG00000041879, ENSMUSG00000010097, ENSMUSG00000002319, ENSMUSG00000022905,…	2.00128	0.193531	0.00193531
GOTERM_CC_5	GO:0005635~nuclear envelope	52	0.000137815	ENSMUSG00000003226, ENSMUSG00000000131, ENSMUSG00000043940, ENSMUSG00000020745, ENSMUSG00000020074, ENSMUSG00000042590, ENSMUSG00000021929, ENSMUSG00000020181, ENSMUSG00000024413, ENSMUSG00000009470, ENSMUSG00000015090, ENSMUSG00000010517, ENSMUSG00000041879, ENSMUSG00000026021, ENSMUSG00000019969, ENSMUSG00000026353, ENSMUSG00000024120, ENSMUSG00000066232, ENSMUSG00000079614, ENSMUSG00000029361,…	1.65509	0.198827	0.00198827
GOTERM_CC_5	GO:0044445~cytosolic part	27	0.000140847	ENSMUSG00000052033, ENSMUSG00000030007, ENSMUSG00000061787, ENSMUSG00000004267, ENSMUSG00000033065, ENSMUSG00000001289, ENSMUSG00000028698, ENSMUSG00000034024, ENSMUSG00000043716, ENSMUSG00000022601, ENSMUSG00000025290, ENSMUSG00000021870, ENSMUSG00000007739, ENSMUSG00000029447, ENSMUSG00000027472, ENSMUSG00000027665, ENSMUSG00000041417, ENSMUSG00000020366, ENSMUSG00000020277, ENSMUSG00000063524,…	2.08705	0.203198	0.00203198
GOTERM_CC_5	GO:0044429~mitochondrial part	143	0.000145004	ENSMUSG00000028246, ENSMUSG00000019428, ENSMUSG00000037916, ENSMUSG00000025968, ENSMUSG00000050856, ENSMUSG00000029433, ENSMUSG00000025204, ENSMUSG00000058076, ENSMUSG00000030451, ENSMUSG00000039176, ENSMUSG00000064341, ENSMUSG00000026198, ENSMUSG00000002346, ENSMUSG00000018574, ENSMUSG00000022437, ENSMUSG00000015357, ENSMUSG00000049225, ENSMUSG00000073422, ENSMUSG00000032047, ENSMUSG00000021139,…	1.32897	0.20919	0.0020919
GOTERM_CC_5	GO:0019866~organelle inner membrane	92	0.000156231	ENSMUSG00000037916, ENSMUSG00000027010, ENSMUSG00000025968, ENSMUSG00000005510, ENSMUSG00000038084, ENSMUSG00000004264, ENSMUSG00000020022, ENSMUSG00000050856, ENSMUSG00000003438, ENSMUSG00000025204, ENSMUSG00000058076, ENSMUSG00000030451, ENSMUSG00000039176, ENSMUSG00000064341, ENSMUSG00000002416, ENSMUSG00000002346, ENSMUSG00000018574, ENSMUSG00000024012, ENSMUSG00000022437, ENSMUSG00000015357,…	1.43596	0.225369	0.00225369
GOTERM_CC_5	GO:0000151~ubiquitin ligase complex	26	0.000156757	ENSMUSG00000029458, ENSMUSG00000052139, ENSMUSG00000028960, ENSMUSG00000023977, ENSMUSG00000030451, ENSMUSG00000004364, ENSMUSG00000024019, ENSMUSG00000022663, ENSMUSG00000040327, ENSMUSG00000032216, ENSMUSG00000029686, ENSMUSG00000033004, ENSMUSG00000055670, ENSMUSG00000024370, ENSMUSG00000029060, ENSMUSG00000020114, ENSMUSG00000036309, ENSMUSG00000022771, ENSMUSG00000027598, ENSMUSG00000024735,…	2.11024	0.226126	0.00226126
GOTERM_CC_5	GO:0035097~histone methyltransferase complex	14	0.00015866	ENSMUSG00000002028, ENSMUSG00000048154, ENSMUSG00000004698, ENSMUSG00000029004, ENSMUSG00000021488, ENSMUSG00000038056, ENSMUSG00000042308, ENSMUSG00000031575, ENSMUSG00000002221, ENSMUSG00000030619, ENSMUSG00000026439, ENSMUSG00000024947, ENSMUSG00000009575, ENSMUSG00000030680	2.96422	0.228868	0.00228868
GOTERM_CC_5	GO:0034708~methyltransferase complex	14	0.00015866	ENSMUSG00000002028, ENSMUSG00000048154, ENSMUSG00000004698, ENSMUSG00000029004, ENSMUSG00000021488, ENSMUSG00000038056, ENSMUSG00000042308, ENSMUSG00000031575, ENSMUSG00000002221, ENSMUSG00000030619, ENSMUSG00000026439, ENSMUSG00000024947, ENSMUSG00000009575, ENSMUSG00000030680	2.96422	0.228868	0.00228868
GOTERM_CC_5	GO:0016469~proton-transporting two-sector ATPase complex	20	0.000267215	ENSMUSG00000019302, ENSMUSG00000022295, ENSMUSG00000024403, ENSMUSG00000052459, ENSMUSG00000019210, ENSMUSG00000022890, ENSMUSG00000039347, ENSMUSG00000050856, ENSMUSG00000025781, ENSMUSG00000004285, ENSMUSG00000034566, ENSMUSG00000000563, ENSMUSG00000019087, ENSMUSG00000038023, ENSMUSG00000025428, ENSMUSG00000033793, ENSMUSG00000033379, ENSMUSG00000024121, ENSMUSG00000025393, ENSMUSG00000021114	2.31895	0.385179	0.00385179
GOTERM_CC_5	GO:0005798~Golgi-associated vesicle	18	0.000297023	ENSMUSG00000040276, ENSMUSG00000030058, ENSMUSG00000032458, ENSMUSG00000026878, ENSMUSG00000047547, ENSMUSG00000041720, ENSMUSG00000025607, ENSMUSG00000055681, ENSMUSG00000004849, ENSMUSG00000056429, ENSMUSG00000054693, ENSMUSG00000028478, ENSMUSG00000047126, ENSMUSG00000024941, ENSMUSG00000029229, ENSMUSG00000033792, ENSMUSG00000032482, ENSMUSG00000026553	2.43489	0.428061	0.00428061
GOTERM_CC_5	GO:0048770~pigment granule	32	0.000485869	ENSMUSG00000034593, ENSMUSG00000019302, ENSMUSG00000028249, ENSMUSG00000001424, ENSMUSG00000024403, ENSMUSG00000007891, ENSMUSG00000018340, ENSMUSG00000029767, ENSMUSG00000021248, ENSMUSG00000015656, ENSMUSG00000019173, ENSMUSG00000000826, ENSMUSG00000037720, ENSMUSG00000026864, ENSMUSG00000020571, ENSMUSG00000058799, ENSMUSG00000022415, ENSMUSG00000007739, ENSMUSG00000032383, ENSMUSG00000025153,…	1.83333	0.699334	0.00699334
GOTERM_CC_5	GO:0030120~vesicle coat	15	0.000487485	ENSMUSG00000030058, ENSMUSG00000032458, ENSMUSG00000039367, ENSMUSG00000047547, ENSMUSG00000025607, ENSMUSG00000055681, ENSMUSG00000004849, ENSMUSG00000028478, ENSMUSG00000047126, ENSMUSG00000024941, ENSMUSG00000001052, ENSMUSG00000030327, ENSMUSG00000028923, ENSMUSG00000026553, ENSMUSG00000020986	2.60882	0.701651	0.00701651
GOTERM_CC_5	GO:0005813~centrosome	51	0.000870088	ENSMUSG00000020745, ENSMUSG00000023764, ENSMUSG00000050812, ENSMUSG00000044066, ENSMUSG00000030397, ENSMUSG00000028447, ENSMUSG00000031922, ENSMUSG00000035437, ENSMUSG00000048799, ENSMUSG00000032118, ENSMUSG00000021597, ENSMUSG00000019971, ENSMUSG00000031347, ENSMUSG00000019578, ENSMUSG00000021870, ENSMUSG00000020687, ENSMUSG00000021068, ENSMUSG00000040407, ENSMUSG00000031592, ENSMUSG00000020580,…	1.55224	1.24913	0.0124913
GOTERM_CC_5	GO:0019717~synaptosome	26	0.00087647	ENSMUSG00000053825, ENSMUSG00000026276, ENSMUSG00000068206, ENSMUSG00000052301, ENSMUSG00000028402, ENSMUSG00000020340, ENSMUSG00000047879, ENSMUSG00000072214, ENSMUSG00000022456, ENSMUSG00000003872, ENSMUSG00000031012, ENSMUSG00000040990, ENSMUSG00000023017, ENSMUSG00000020886, ENSMUSG00000078816, ENSMUSG00000030209, ENSMUSG00000027457, ENSMUSG00000022957, ENSMUSG00000040640, ENSMUSG00000058835,…	1.9184	1.25824	0.0125824
GOTERM_CC_5	GO:0030660~Golgi-associated vesicle membrane	12	0.00120765	ENSMUSG00000028478, ENSMUSG00000030058, ENSMUSG00000032458, ENSMUSG00000047126, ENSMUSG00000024941, ENSMUSG00000032482, ENSMUSG00000041720, ENSMUSG00000047547, ENSMUSG00000025607, ENSMUSG00000055681, ENSMUSG00000026553, ENSMUSG00000004849	2.78274	1.72983	0.0172983
GOTERM_CC_5	GO:0005739~mitochondrion	315	0.00149176	ENSMUSG00000037916, ENSMUSG00000031782, ENSMUSG00000050856, ENSMUSG00000031505, ENSMUSG00000058076, ENSMUSG00000025204, ENSMUSG00000029780, ENSMUSG00000039176, ENSMUSG00000001127, ENSMUSG00000026198, ENSMUSG00000027457, ENSMUSG00000064341, ENSMUSG00000046947, ENSMUSG00000067847, ENSMUSG00000025486, ENSMUSG00000034189, ENSMUSG00000049225, ENSMUSG00000073422, ENSMUSG00000021139, ENSMUSG00000029993,…	1.16035	2.13271	0.0213271
GOTERM_CC_5	GO:0070161~anchoring junction	40	0.0022777	ENSMUSG00000021782, ENSMUSG00000033060, ENSMUSG00000022568, ENSMUSG00000038366, ENSMUSG00000036099, ENSMUSG00000019851, ENSMUSG00000009073, ENSMUSG00000028465, ENSMUSG00000022995, ENSMUSG00000021823, ENSMUSG00000036452, ENSMUSG00000057738, ENSMUSG00000032064, ENSMUSG00000022240, ENSMUSG00000000416, ENSMUSG00000063063, ENSMUSG00000022607, ENSMUSG00000059456, ENSMUSG00000006932, ENSMUSG00000006304,…	1.58367	3.23924	0.0323924
GOTERM_CC_5	GO:0016363~nuclear matrix	18	0.00249768	ENSMUSG00000062929, ENSMUSG00000020661, ENSMUSG00000021938, ENSMUSG00000029290, ENSMUSG00000066306, ENSMUSG00000011751, ENSMUSG00000028820, ENSMUSG00000024498, ENSMUSG00000027525, ENSMUSG00000032249, ENSMUSG00000023927, ENSMUSG00000024045, ENSMUSG00000028809, ENSMUSG00000037236, ENSMUSG00000000743, ENSMUSG00000002625, ENSMUSG00000015461, ENSMUSG00000024974	2.08705	3.54685	0.0354685
GOTERM_CC_5	GO:0033178~proton-transporting two-sector ATPase complex, catalytic domain	10	0.00310013	ENSMUSG00000019087, ENSMUSG00000022295, ENSMUSG00000052459, ENSMUSG00000025428, ENSMUSG00000019210, ENSMUSG00000033793, ENSMUSG00000025393, ENSMUSG00000025781, ENSMUSG00000004285, ENSMUSG00000021114	2.86458	4.38466	0.0438466
GOTERM_CC_5	GO:0000119~mediator complex	7	0.0035164	ENSMUSG00000017210, ENSMUSG00000079487, ENSMUSG00000043962, ENSMUSG00000030291, ENSMUSG00000012114, ENSMUSG00000018076, ENSMUSG00000027080	3.78761	4.9596	0.049596
GOTERM_CC_5	GO:0000123~histone acetyltransferase complex	13	0.00429355	ENSMUSG00000022338, ENSMUSG00000062270, ENSMUSG00000038909, ENSMUSG00000055024, ENSMUSG00000020918, ENSMUSG00000028863, ENSMUSG00000048930, ENSMUSG00000024240, ENSMUSG00000003868, ENSMUSG00000059995, ENSMUSG00000031540, ENSMUSG00000022521, ENSMUSG00000045482	2.34471	6.02435	0.0602435
GOTERM_CC_5	GO:0005769~early endosome	21	0.00479346	ENSMUSG00000021910, ENSMUSG00000029060, ENSMUSG00000047037, ENSMUSG00000004319, ENSMUSG00000021224, ENSMUSG00000037224, ENSMUSG00000026878, ENSMUSG00000034216, ENSMUSG00000029146, ENSMUSG00000036989, ENSMUSG00000041236, ENSMUSG00000020817, ENSMUSG00000028788, ENSMUSG00000036499, ENSMUSG00000026024, ENSMUSG00000000743, ENSMUSG00000026721, ENSMUSG00000023030, ENSMUSG00000017831, ENSMUSG00000015461,…	1.85937	6.70339	0.0670339
GOTERM_CC_5	GO:0022626~cytosolic ribosome	10	0.00508043	ENSMUSG00000043716, ENSMUSG00000017404, ENSMUSG00000005102, ENSMUSG00000028772, ENSMUSG00000071415, ENSMUSG00000046364, ENSMUSG00000022601, ENSMUSG00000061787, ENSMUSG00000040952, ENSMUSG00000025290	2.70544	7.09112	0.0709112
GOTERM_CC_5	GO:0016323~basolateral plasma membrane	43	0.00565151	ENSMUSG00000022568, ENSMUSG00000038366, ENSMUSG00000007613, ENSMUSG00000021709, ENSMUSG00000042616, ENSMUSG00000031012, ENSMUSG00000027030, ENSMUSG00000027340, ENSMUSG00000026576, ENSMUSG00000032839, ENSMUSG00000022995, ENSMUSG00000028465, ENSMUSG00000021823, ENSMUSG00000036452, ENSMUSG00000003273, ENSMUSG00000032064, ENSMUSG00000019996, ENSMUSG00000000416, ENSMUSG00000063063, ENSMUSG00000022607,…	1.48511	7.85826	0.0785826
GOTERM_CC_5	GO:0034399~nuclear periphery	19	0.00643531	ENSMUSG00000020661, ENSMUSG00000011751, ENSMUSG00000027525, ENSMUSG00000001964, ENSMUSG00000028809, ENSMUSG00000037236, ENSMUSG00000002625, ENSMUSG00000021938, ENSMUSG00000062929, ENSMUSG00000029290, ENSMUSG00000066306, ENSMUSG00000028820, ENSMUSG00000024498, ENSMUSG00000032249, ENSMUSG00000023927, ENSMUSG00000024045, ENSMUSG00000000743, ENSMUSG00000015461, ENSMUSG00000024974	1.88829	8.90155	0.0890155
GOTERM_CC_5	GO:0033267~axon part	12	0.00677813	ENSMUSG00000004113, ENSMUSG00000011751, ENSMUSG00000005871, ENSMUSG00000055254, ENSMUSG00000023050, ENSMUSG00000017167, ENSMUSG00000041607, ENSMUSG00000052516, ENSMUSG00000031391, ENSMUSG00000064329, ENSMUSG00000005089, ENSMUSG00000024163	2.3375	9.3544	0.093544
GOTERM_CC_5	GO:0031968~organelle outer membrane	29	0.00706691	ENSMUSG00000028246, ENSMUSG00000005674, ENSMUSG00000038084, ENSMUSG00000020333, ENSMUSG00000018796, ENSMUSG00000025733, ENSMUSG00000026198, ENSMUSG00000041241, ENSMUSG00000078566, ENSMUSG00000024900, ENSMUSG00000022437, ENSMUSG00000024981, ENSMUSG00000008892, ENSMUSG00000026150, ENSMUSG00000028991, ENSMUSG00000021139, ENSMUSG00000020181, ENSMUSG00000024978, ENSMUSG00000021771, ENSMUSG00000020402,…	1.62326	9.73424	0.0973424
GOTERM_MF_5	GO:0032559~adenyl ribonucleotide binding	437	7.42892e-30	ENSMUSG00000018707, ENSMUSG00000033065, ENSMUSG00000026198, ENSMUSG00000029580, ENSMUSG00000046947, ENSMUSG00000025613, ENSMUSG00000009394, ENSMUSG00000001016, ENSMUSG00000022263, ENSMUSG00000033161, ENSMUSG00000020115, ENSMUSG00000025885, ENSMUSG00000027646, ENSMUSG00000020900, ENSMUSG00000022110, ENSMUSG00000021500, ENSMUSG00000038302, ENSMUSG00000020708, ENSMUSG00000020802, ENSMUSG00000025393,…	1.60188	1.03769e-26	1.03769e-28
GOTERM_MF_5	GO:0016462~pyrophosphatase activity	208	4.19348e-18	ENSMUSG00000018707, ENSMUSG00000024639, ENSMUSG00000026198, ENSMUSG00000019977, ENSMUSG00000022789, ENSMUSG00000033379, ENSMUSG00000010086, ENSMUSG00000031788, ENSMUSG00000062380, ENSMUSG00000042699, ENSMUSG00000030946, ENSMUSG00000001525, ENSMUSG00000003660, ENSMUSG00000033161, ENSMUSG00000030265, ENSMUSG00000024253, ENSMUSG00000025781, ENSMUSG00000025885, ENSMUSG00000020900, ENSMUSG00000021500,…	1.73935	5.85756e-15	5.85756e-17
GOTERM_MF_5	GO:0004672~protein kinase activity	187	1.95274e-15	ENSMUSG00000029613, ENSMUSG00000022451, ENSMUSG00000024969, ENSMUSG00000025060, ENSMUSG00000053137, ENSMUSG00000059146, ENSMUSG00000069631, ENSMUSG00000029516, ENSMUSG00000034761, ENSMUSG00000001127, ENSMUSG00000030397, ENSMUSG00000026437, ENSMUSG00000046947, ENSMUSG00000021820, ENSMUSG00000052155, ENSMUSG00000031314, ENSMUSG00000025199, ENSMUSG00000022263, ENSMUSG00000053819, ENSMUSG00000024789,…	1.71663	2.78666e-12	2.78666e-14
GOTERM_MF_5	GO:0008017~microtubule binding	33	2.84364e-09	ENSMUSG00000034593, ENSMUSG00000020745, ENSMUSG00000055407, ENSMUSG00000028059, ENSMUSG00000049550, ENSMUSG00000028649, ENSMUSG00000030397, ENSMUSG00000033392, ENSMUSG00000066306, ENSMUSG00000003810, ENSMUSG00000005871, ENSMUSG00000021573, ENSMUSG00000029757, ENSMUSG00000031922, ENSMUSG00000026131, ENSMUSG00000019971, ENSMUSG00000029166, ENSMUSG00000032740, ENSMUSG00000020716, ENSMUSG00000026280,…	2.89525	3.97206e-06	3.97206e-08
GOTERM_MF_5	GO:0032561~guanyl ribonucleotide binding	110	6.84935e-08	ENSMUSG00000028057, ENSMUSG00000022456, ENSMUSG00000047842, ENSMUSG00000034930, ENSMUSG00000024639, ENSMUSG00000019977, ENSMUSG00000022789, ENSMUSG00000010086, ENSMUSG00000032042, ENSMUSG00000020671, ENSMUSG00000062380, ENSMUSG00000027519, ENSMUSG00000001525, ENSMUSG00000021062, ENSMUSG00000020486, ENSMUSG00000030265, ENSMUSG00000021068, ENSMUSG00000054855, ENSMUSG00000020088, ENSMUSG00000021066,…	1.62177	9.56735e-05	9.56735e-07
GOTERM_MF_5	GO:0042625~ATPase activity, coupled to transmembrane movement of ions	31	1.74156e-06	ENSMUSG00000060671, ENSMUSG00000031441, ENSMUSG00000024403, ENSMUSG00000019210, ENSMUSG00000040907, ENSMUSG00000037685, ENSMUSG00000024566, ENSMUSG00000019943, ENSMUSG00000004285, ENSMUSG00000026576, ENSMUSG00000019087, ENSMUSG00000031376, ENSMUSG00000025428, ENSMUSG00000033793, ENSMUSG00000033379, ENSMUSG00000033792, ENSMUSG00000029467, ENSMUSG00000052456, ENSMUSG00000022295, ENSMUSG00000033161,…	2.40445	0.00243263	2.43263e-05
GOTERM_MF_5	GO:0015405~P-P-bond-hydrolysis-driven transmembrane transporter activity	41	3.92274e-06	ENSMUSG00000031441, ENSMUSG00000060671, ENSMUSG00000024403, ENSMUSG00000078974, ENSMUSG00000019210, ENSMUSG00000040907, ENSMUSG00000037685, ENSMUSG00000024566, ENSMUSG00000019943, ENSMUSG00000022822, ENSMUSG00000004285, ENSMUSG00000026576, ENSMUSG00000026198, ENSMUSG00000019087, ENSMUSG00000031376, ENSMUSG00000025428, ENSMUSG00000030082, ENSMUSG00000033379, ENSMUSG00000033793, ENSMUSG00000033792,…	2.0507	0.00547924	5.47924e-05
GOTERM_MF_5	GO:0003714~transcription corepressor activity	31	5.04463e-06	ENSMUSG00000029478, ENSMUSG00000030213, ENSMUSG00000033565, ENSMUSG00000029050, ENSMUSG00000040761, ENSMUSG00000027206, ENSMUSG00000020473, ENSMUSG00000021488, ENSMUSG00000025246, ENSMUSG00000018501, ENSMUSG00000027630, ENSMUSG00000000581, ENSMUSG00000000861, ENSMUSG00000061436, ENSMUSG00000049577, ENSMUSG00000028282, ENSMUSG00000032405, ENSMUSG00000031622, ENSMUSG00000030967, ENSMUSG00000008855,…	2.30426	0.00704624	7.04624e-05
GOTERM_MF_5	GO:0019787~small conjugating protein ligase activity	45	8.23843e-06	ENSMUSG00000032307, ENSMUSG00000027011, ENSMUSG00000005371, ENSMUSG00000025261, ENSMUSG00000038965, ENSMUSG00000044308, ENSMUSG00000029458, ENSMUSG00000035247, ENSMUSG00000028960, ENSMUSG00000042572, ENSMUSG00000023977, ENSMUSG00000030451, ENSMUSG00000066036, ENSMUSG00000051234, ENSMUSG00000024019, ENSMUSG00000041241, ENSMUSG00000022663, ENSMUSG00000009293, ENSMUSG00000032216, ENSMUSG00000020265,…	1.92666	0.011507	0.00011507
GOTERM_MF_5	GO:0004221~ubiquitin thiolesterase activity	30	1.15099e-05	ENSMUSG00000026914, ENSMUSG00000031154, ENSMUSG00000047879, ENSMUSG00000028514, ENSMUSG00000000804, ENSMUSG00000062627, ENSMUSG00000027363, ENSMUSG00000036712, ENSMUSG00000031010, ENSMUSG00000029640, ENSMUSG00000054814, ENSMUSG00000022867, ENSMUSG00000031066, ENSMUSG00000020124, ENSMUSG00000043411, ENSMUSG00000031826, ENSMUSG00000051306, ENSMUSG00000056305, ENSMUSG00000022710, ENSMUSG00000042506,…	2.26134	0.0160761	0.000160761
GOTERM_MF_5	GO:0000287~magnesium ion binding	112	1.17892e-05	ENSMUSG00000024969, ENSMUSG00000031441, ENSMUSG00000001323, ENSMUSG00000024566, ENSMUSG00000029780, ENSMUSG00000033065, ENSMUSG00000039176, ENSMUSG00000022840, ENSMUSG00000052155, ENSMUSG00000049225, ENSMUSG00000033161, ENSMUSG00000032570, ENSMUSG00000034751, ENSMUSG00000050860, ENSMUSG00000021279, ENSMUSG00000031309, ENSMUSG00000022191, ENSMUSG00000021273, ENSMUSG00000028630, ENSMUSG00000073435,…	1.46554	0.0164661	0.000164661
GOTERM_MF_5	GO:0042626~ATPase activity, coupled to transmembrane movement of substances	36	3.72377e-05	ENSMUSG00000031441, ENSMUSG00000060671, ENSMUSG00000024403, ENSMUSG00000019210, ENSMUSG00000040907, ENSMUSG00000037685, ENSMUSG00000024566, ENSMUSG00000019943, ENSMUSG00000022822, ENSMUSG00000004285, ENSMUSG00000026198, ENSMUSG00000026576, ENSMUSG00000019087, ENSMUSG00000031376, ENSMUSG00000025428, ENSMUSG00000033793, ENSMUSG00000033379, ENSMUSG00000033792, ENSMUSG00000029467, ENSMUSG00000052456,…	1.98625	0.052002	0.00052002
GOTERM_MF_5	GO:0019901~protein kinase binding	28	0.000100841	ENSMUSG00000025658, ENSMUSG00000070348, ENSMUSG00000020151, ENSMUSG00000005534, ENSMUSG00000025422, ENSMUSG00000032604, ENSMUSG00000020372, ENSMUSG00000060261, ENSMUSG00000047139, ENSMUSG00000028944, ENSMUSG00000032740, ENSMUSG00000068206, ENSMUSG00000024271, ENSMUSG00000031555, ENSMUSG00000022770, ENSMUSG00000039166, ENSMUSG00000020859, ENSMUSG00000010517, ENSMUSG00000022619, ENSMUSG00000054693,…	2.11058	0.140765	0.00140765
GOTERM_MF_5	GO:0005099~Ras GTPase activator activity	26	0.000145979	ENSMUSG00000052302, ENSMUSG00000031709, ENSMUSG00000042203, ENSMUSG00000028030, ENSMUSG00000036882, ENSMUSG00000024096, ENSMUSG00000038351, ENSMUSG00000039178, ENSMUSG00000036644, ENSMUSG00000023923, ENSMUSG00000021676, ENSMUSG00000020130, ENSMUSG00000021218, ENSMUSG00000026024, ENSMUSG00000022391, ENSMUSG00000048960, ENSMUSG00000022749, ENSMUSG00000026721, ENSMUSG00000035437, ENSMUSG00000011831,…	2.14073	0.203715	0.00203715
GOTERM_MF_5	GO:0003713~transcription coactivator activity	35	0.000184494	ENSMUSG00000003575, ENSMUSG00000009569, ENSMUSG00000043962, ENSMUSG00000019302, ENSMUSG00000027678, ENSMUSG00000030291, ENSMUSG00000055024, ENSMUSG00000062627, ENSMUSG00000029004, ENSMUSG00000022521, ENSMUSG00000046711, ENSMUSG00000073422, ENSMUSG00000021039, ENSMUSG00000064127, ENSMUSG00000006932, ENSMUSG00000079487, ENSMUSG00000022338, ENSMUSG00000022634, ENSMUSG00000041164, ENSMUSG00000021690,…	1.87314	0.257397	0.00257397
GOTERM_MF_5	GO:0005097~Rab GTPase activator activity	19	0.000362399	ENSMUSG00000052302, ENSMUSG00000031709, ENSMUSG00000028030, ENSMUSG00000042203, ENSMUSG00000038351, ENSMUSG00000039178, ENSMUSG00000036644, ENSMUSG00000023923, ENSMUSG00000020130, ENSMUSG00000021218, ENSMUSG00000026024, ENSMUSG00000022749, ENSMUSG00000026721, ENSMUSG00000035437, ENSMUSG00000011831, ENSMUSG00000036104, ENSMUSG00000042216, ENSMUSG00000029192, ENSMUSG00000011832	2.36476	0.50502	0.0050502
GOTERM_MF_5	GO:0005086~ARF guanyl-nucleotide exchange factor activity	10	0.000456381	ENSMUSG00000074582, ENSMUSG00000017132, ENSMUSG00000030465, ENSMUSG00000037126, ENSMUSG00000025224, ENSMUSG00000019852, ENSMUSG00000018001, ENSMUSG00000040797, ENSMUSG00000034312, ENSMUSG00000003269	3.56789	0.635602	0.00635602
GOTERM_MF_5	GO:0004812~aminoacyl-tRNA ligase activity	20	0.000585539	ENSMUSG00000030515, ENSMUSG00000026615, ENSMUSG00000024587, ENSMUSG00000018848, ENSMUSG00000026618, ENSMUSG00000037851, ENSMUSG00000028292, ENSMUSG00000032604, ENSMUSG00000021266, ENSMUSG00000039804, ENSMUSG00000019039, ENSMUSG00000006005, ENSMUSG00000068739, ENSMUSG00000005102, ENSMUSG00000031960, ENSMUSG00000024493, ENSMUSG00000026356, ENSMUSG00000007670, ENSMUSG00000010755, ENSMUSG00000040354	2.22993	0.814798	0.00814798
GOTERM_MF_5	GO:0008324~cation transmembrane transporter activity	119	0.00105099	ENSMUSG00000050856, ENSMUSG00000032839, ENSMUSG00000033379, ENSMUSG00000021313, ENSMUSG00000025212, ENSMUSG00000053395, ENSMUSG00000052456, ENSMUSG00000033161, ENSMUSG00000052459, ENSMUSG00000032570, ENSMUSG00000037579, ENSMUSG00000001098, ENSMUSG00000040896, ENSMUSG00000025781, ENSMUSG00000014786, ENSMUSG00000023033, ENSMUSG00000020704, ENSMUSG00000028631, ENSMUSG00000025393, ENSMUSG00000023030,…	1.30774	1.45809	0.0145809
GOTERM_MF_5	GO:0005509~calcium ion binding	191	0.00156581	ENSMUSG00000016382, ENSMUSG00000050711, ENSMUSG00000060126, ENSMUSG00000024261, ENSMUSG00000019370, ENSMUSG00000007440, ENSMUSG00000027253, ENSMUSG00000022957, ENSMUSG00000039943, ENSMUSG00000040033, ENSMUSG00000036438, ENSMUSG00000049225, ENSMUSG00000034040, ENSMUSG00000053395, ENSMUSG00000035566, ENSMUSG00000039953, ENSMUSG00000021130, ENSMUSG00000062372, ENSMUSG00000020111, ENSMUSG00000003161,…	1.2169	2.16509	0.0216509
GOTERM_MF_5	GO:0016791~phosphatase activity	63	0.00282104	ENSMUSG00000003438, ENSMUSG00000029780, ENSMUSG00000043733, ENSMUSG00000024052, ENSMUSG00000028788, ENSMUSG00000046442, ENSMUSG00000044667, ENSMUSG00000037826, ENSMUSG00000049225, ENSMUSG00000039431, ENSMUSG00000034613, ENSMUSG00000033411, ENSMUSG00000025314, ENSMUSG00000033161, ENSMUSG00000038764, ENSMUSG00000026113, ENSMUSG00000018648, ENSMUSG00000029326, ENSMUSG00000041231, ENSMUSG00000050860,…	1.41666	3.86922	0.0386922
GOTERM_MF_5	GO:0005088~Ras guanyl-nucleotide exchange factor activity	27	0.003755	ENSMUSG00000031442, ENSMUSG00000009681, ENSMUSG00000021662, ENSMUSG00000028059, ENSMUSG00000040687, ENSMUSG00000019467, ENSMUSG00000025558, ENSMUSG00000025555, ENSMUSG00000022957, ENSMUSG00000022263, ENSMUSG00000025656, ENSMUSG00000028896, ENSMUSG00000039713, ENSMUSG00000041992, ENSMUSG00000031511, ENSMUSG00000017631, ENSMUSG00000020640, ENSMUSG00000004568, ENSMUSG00000062232, ENSMUSG00000026585,…	1.74096	5.11926	0.0511926
GOTERM_MF_5	GO:0031267~small GTPase binding	21	0.00386402	ENSMUSG00000030172, ENSMUSG00000038665, ENSMUSG00000041670, ENSMUSG00000037679, ENSMUSG00000041268, ENSMUSG00000036053, ENSMUSG00000024456, ENSMUSG00000034930, ENSMUSG00000031284, ENSMUSG00000024096, ENSMUSG00000034574, ENSMUSG00000028059, ENSMUSG00000035901, ENSMUSG00000041879, ENSMUSG00000021357, ENSMUSG00000025558, ENSMUSG00000020740, ENSMUSG00000055805, ENSMUSG00000026024, ENSMUSG00000040260,…	1.90489	5.26419	0.0526419
GOTERM_MF_5	GO:0008060~ARF GTPase activator activity	11	0.0053657	ENSMUSG00000023353, ENSMUSG00000027255, ENSMUSG00000026159, ENSMUSG00000011877, ENSMUSG00000022377, ENSMUSG00000037999, ENSMUSG00000026155, ENSMUSG00000029722, ENSMUSG00000027575, ENSMUSG00000032870, ENSMUSG00000025422	2.55957	7.23968	0.0723968
GOTERM_MF_5	GO:0008276~protein methyltransferase activity	17	0.00552894	ENSMUSG00000002028, ENSMUSG00000013787, ENSMUSG00000019795, ENSMUSG00000049327, ENSMUSG00000021488, ENSMUSG00000015697, ENSMUSG00000057406, ENSMUSG00000051285, ENSMUSG00000037111, ENSMUSG00000029004, ENSMUSG00000054823, ENSMUSG00000060098, ENSMUSG00000030763, ENSMUSG00000038056, ENSMUSG00000006920, ENSMUSG00000030350, ENSMUSG00000030619	2.0218	7.4521	0.074521
GOTERM_MF_5	GO:0019903~protein phosphatase binding	9	0.00711006	ENSMUSG00000042772, ENSMUSG00000006932, ENSMUSG00000030718, ENSMUSG00000039515, ENSMUSG00000024908, ENSMUSG00000001415, ENSMUSG00000005534, ENSMUSG00000034101, ENSMUSG00000052296	2.83332	9.48638	0.0948638
GOTERM_MF_5	GO:0046914~transition metal ion binding	531	0.00732591	ENSMUSG00000033060, ENSMUSG00000037916, ENSMUSG00000025203, ENSMUSG00000025793, ENSMUSG00000042726, ENSMUSG00000039367, ENSMUSG00000028700, ENSMUSG00000053286, ENSMUSG00000038418, ENSMUSG00000042446, ENSMUSG00000061911, ENSMUSG00000003178, ENSMUSG00000003273, ENSMUSG00000066798, ENSMUSG00000010086, ENSMUSG00000053581, ENSMUSG00000025486, ENSMUSG00000067942, ENSMUSG00000025212, ENSMUSG00000028309,…	1.08966	9.76086	0.0976086

## Sheet: exGF-SI
Category	Term	Count	PValue	Genes	Fold Enrichment	FDR [%]	FDR faction
KEGG_PATHWAY	mmu03040:Spliceosome	75	3.45419e-17	ENSMUSG00000029817, ENSMUSG00000024422, ENSMUSG00000030216, ENSMUSG00000040383, ENSMUSG00000031157, ENSMUSG00000039630, ENSMUSG00000060373, ENSMUSG00000015656, ENSMUSG00000028676, ENSMUSG00000031683, ENSMUSG00000023932, ENSMUSG00000032407, ENSMUSG00000034931, ENSMUSG00000059208, ENSMUSG00000059005, ENSMUSG00000002455, ENSMUSG00000037475, ENSMUSG00000033732, ENSMUSG00000005687, ENSMUSG00000021039,…	2.46139	4.25863e-14	4.25863e-16
KEGG_PATHWAY	mmu04120:Ubiquitin mediated proteolysis	72	2.08001e-12	ENSMUSG00000032307, ENSMUSG00000027011, ENSMUSG00000038965, ENSMUSG00000029176, ENSMUSG00000030451, ENSMUSG00000004364, ENSMUSG00000051234, ENSMUSG00000038416, ENSMUSG00000032216, ENSMUSG00000041058, ENSMUSG00000030061, ENSMUSG00000029686, ENSMUSG00000052981, ENSMUSG00000031446, ENSMUSG00000034342, ENSMUSG00000035048, ENSMUSG00000036840, ENSMUSG00000020687, ENSMUSG00000025939, ENSMUSG00000079323,…	2.15444	2.56442e-09	2.56442e-11
KEGG_PATHWAY	mmu04720:Long-term potentiation	41	4.87566e-09	ENSMUSG00000004455, ENSMUSG00000022490, ENSMUSG00000055024, ENSMUSG00000019828, ENSMUSG00000019370, ENSMUSG00000001127, ENSMUSG00000002413, ENSMUSG00000020431, ENSMUSG00000024617, ENSMUSG00000024639, ENSMUSG00000039943, ENSMUSG00000035027, ENSMUSG00000050965, ENSMUSG00000059003, ENSMUSG00000036438, ENSMUSG00000038128, ENSMUSG00000021820, ENSMUSG00000022521, ENSMUSG00000052889, ENSMUSG00000019907,…	2.38357	6.01114e-06	6.01114e-08
KEGG_PATHWAY	mmu05016:Huntington's disease	81	6.42463e-09	ENSMUSG00000037916, ENSMUSG00000022450, ENSMUSG00000025968, ENSMUSG00000005510, ENSMUSG00000048482, ENSMUSG00000031783, ENSMUSG00000025204, ENSMUSG00000019777, ENSMUSG00000020886, ENSMUSG00000018770, ENSMUSG00000024639, ENSMUSG00000006057, ENSMUSG00000061518, ENSMUSG00000002416, ENSMUSG00000039943, ENSMUSG00000022956, ENSMUSG00000022841, ENSMUSG00000021764, ENSMUSG00000059534, ENSMUSG00000025651,…	1.80126	7.92085e-06	7.92085e-08
KEGG_PATHWAY	mmu04010:MAPK signaling pathway	104	8.8645e-08	ENSMUSG00000015656, ENSMUSG00000015968, ENSMUSG00000001847, ENSMUSG00000022781, ENSMUSG00000026436, ENSMUSG00000028708, ENSMUSG00000025199, ENSMUSG00000029231, ENSMUSG00000051331, ENSMUSG00000019146, ENSMUSG00000028161, ENSMUSG00000030849, ENSMUSG00000018648, ENSMUSG00000062232, ENSMUSG00000028832, ENSMUSG00000027104, ENSMUSG00000053716, ENSMUSG00000055254, ENSMUSG00000014077, ENSMUSG00000024952,…	1.59709	0.000109289	1.09289e-06
KEGG_PATHWAY	mmu04144:Endocytosis	81	1.06333e-06	ENSMUSG00000023353, ENSMUSG00000003228, ENSMUSG00000025793, ENSMUSG00000020375, ENSMUSG00000037098, ENSMUSG00000041115, ENSMUSG00000015656, ENSMUSG00000032504, ENSMUSG00000032870, ENSMUSG00000006058, ENSMUSG00000028488, ENSMUSG00000027255, ENSMUSG00000032216, ENSMUSG00000022841, ENSMUSG00000041058, ENSMUSG00000022789, ENSMUSG00000037999, ENSMUSG00000026155, ENSMUSG00000029231, ENSMUSG00000024867,…	1.63183	0.00131095	1.31095e-05
KEGG_PATHWAY	mmu05010:Alzheimer's disease	72	8.09882e-06	ENSMUSG00000056999, ENSMUSG00000037916, ENSMUSG00000022450, ENSMUSG00000025968, ENSMUSG00000005510, ENSMUSG00000025204, ENSMUSG00000015968, ENSMUSG00000018770, ENSMUSG00000019370, ENSMUSG00000031878, ENSMUSG00000024639, ENSMUSG00000006057, ENSMUSG00000061518, ENSMUSG00000002416, ENSMUSG00000032086, ENSMUSG00000039943, ENSMUSG00000022956, ENSMUSG00000059003, ENSMUSG00000036438, ENSMUSG00000021764,…	1.60991	0.00998448	9.98448e-05
KEGG_PATHWAY	mmu05012:Parkinson's disease	56	1.19537e-05	ENSMUSG00000037916, ENSMUSG00000022450, ENSMUSG00000005510, ENSMUSG00000025968, ENSMUSG00000038965, ENSMUSG00000025204, ENSMUSG00000018770, ENSMUSG00000064345, ENSMUSG00000061518, ENSMUSG00000006057, ENSMUSG00000002416, ENSMUSG00000022956, ENSMUSG00000021764, ENSMUSG00000059534, ENSMUSG00000025651, ENSMUSG00000030884, ENSMUSG00000026260, ENSMUSG00000079323, ENSMUSG00000021771, ENSMUSG00000020402,…	1.71348	0.0147365	0.000147365
KEGG_PATHWAY	mmu04810:Regulation of actin cytoskeleton	82	1.35416e-05	ENSMUSG00000004455, ENSMUSG00000026737, ENSMUSG00000049775, ENSMUSG00000001847, ENSMUSG00000001127, ENSMUSG00000045613, ENSMUSG00000002413, ENSMUSG00000022781, ENSMUSG00000034868, ENSMUSG00000029580, ENSMUSG00000030786, ENSMUSG00000022995, ENSMUSG00000025551, ENSMUSG00000026193, ENSMUSG00000029684, ENSMUSG00000032773, ENSMUSG00000025856, ENSMUSG00000029231, ENSMUSG00000024867, ENSMUSG00000022607,…	1.53778	0.016694	0.00016694
KEGG_PATHWAY	mmu03050:Proteasome	26	2.14749e-05	ENSMUSG00000026914, ENSMUSG00000002102, ENSMUSG00000015671, ENSMUSG00000020720, ENSMUSG00000017428, ENSMUSG00000026229, ENSMUSG00000060073, ENSMUSG00000026750, ENSMUSG00000018286, ENSMUSG00000025487, ENSMUSG00000029649, ENSMUSG00000032301, ENSMUSG00000005779, ENSMUSG00000017221, ENSMUSG00000021024, ENSMUSG00000040850, ENSMUSG00000021737, ENSMUSG00000022216, ENSMUSG00000027566, ENSMUSG00000005625,…	2.25121	0.0264729	0.000264729
KEGG_PATHWAY	mmu04150:mTOR signaling pathway	28	4.35745e-05	ENSMUSG00000026254, ENSMUSG00000021109, ENSMUSG00000069631, ENSMUSG00000021981, ENSMUSG00000028156, ENSMUSG00000029512, ENSMUSG00000002413, ENSMUSG00000028698, ENSMUSG00000001729, ENSMUSG00000020516, ENSMUSG00000028518, ENSMUSG00000004056, ENSMUSG00000002496, ENSMUSG00000058655, ENSMUSG00000028945, ENSMUSG00000027665, ENSMUSG00000026812, ENSMUSG00000063358, ENSMUSG00000019699, ENSMUSG00000041417,…	2.11011	0.0537093	0.000537093
KEGG_PATHWAY	mmu05211:Renal cell carcinoma	33	8.43409e-05	ENSMUSG00000021109, ENSMUSG00000055024, ENSMUSG00000031284, ENSMUSG00000001847, ENSMUSG00000001127, ENSMUSG00000034801, ENSMUSG00000002413, ENSMUSG00000006134, ENSMUSG00000022781, ENSMUSG00000028698, ENSMUSG00000001729, ENSMUSG00000015709, ENSMUSG00000043733, ENSMUSG00000058709, ENSMUSG00000035027, ENSMUSG00000028645, ENSMUSG00000039844, ENSMUSG00000022521, ENSMUSG00000025856, ENSMUSG00000004056,…	1.91848	0.103933	0.00103933
KEGG_PATHWAY	mmu04910:Insulin signaling pathway	55	8.85745e-05	ENSMUSG00000004455, ENSMUSG00000026254, ENSMUSG00000025855, ENSMUSG00000032601, ENSMUSG00000028156, ENSMUSG00000019370, ENSMUSG00000001127, ENSMUSG00000002413, ENSMUSG00000028708, ENSMUSG00000036438, ENSMUSG00000039844, ENSMUSG00000020532, ENSMUSG00000044167, ENSMUSG00000002496, ENSMUSG00000028945, ENSMUSG00000034342, ENSMUSG00000001175, ENSMUSG00000029167, ENSMUSG00000055980, ENSMUSG00000063358,…	1.6219	0.109148	0.00109148
KEGG_PATHWAY	mmu00190:Oxidative phosphorylation	52	0.000127933	ENSMUSG00000037916, ENSMUSG00000005510, ENSMUSG00000025968, ENSMUSG00000022450, ENSMUSG00000019210, ENSMUSG00000025204, ENSMUSG00000018770, ENSMUSG00000064345, ENSMUSG00000061518, ENSMUSG00000006057, ENSMUSG00000002416, ENSMUSG00000022956, ENSMUSG00000033379, ENSMUSG00000021764, ENSMUSG00000059534, ENSMUSG00000025651, ENSMUSG00000028013, ENSMUSG00000030884, ENSMUSG00000022295, ENSMUSG00000026260,…	1.6278	0.157613	0.00157613
KEGG_PATHWAY	mmu04722:Neurotrophin signaling pathway	51	0.000262515	ENSMUSG00000048482, ENSMUSG00000048756, ENSMUSG00000059146, ENSMUSG00000030733, ENSMUSG00000036333, ENSMUSG00000020849, ENSMUSG00000001847, ENSMUSG00000019370, ENSMUSG00000002413, ENSMUSG00000021514, ENSMUSG00000043733, ENSMUSG00000036438, ENSMUSG00000039844, ENSMUSG00000021820, ENSMUSG00000042406, ENSMUSG00000057897, ENSMUSG00000001175, ENSMUSG00000002948, ENSMUSG00000055980, ENSMUSG00000006494,…	1.5965	0.32317	0.0032317
KEGG_PATHWAY	mmu03010:Ribosome	38	0.000276904	ENSMUSG00000032399, ENSMUSG00000006333, ENSMUSG00000061983, ENSMUSG00000000740, ENSMUSG00000025794, ENSMUSG00000071415, ENSMUSG00000058558, ENSMUSG00000061787, ENSMUSG00000059291, ENSMUSG00000081094, ENSMUSG00000060636, ENSMUSG00000019505, ENSMUSG00000060938, ENSMUSG00000018362, ENSMUSG00000048758, ENSMUSG00000022601, ENSMUSG00000058600, ENSMUSG00000025290, ENSMUSG00000012405, ENSMUSG00000049517,…	1.73754	0.340857	0.00340857
KEGG_PATHWAY	mmu00020:Citrate cycle (TCA cycle)	18	0.000279987	ENSMUSG00000026526, ENSMUSG00000022477, ENSMUSG00000021913, ENSMUSG00000020321, ENSMUSG00000021577, ENSMUSG00000061838, ENSMUSG00000032279, ENSMUSG00000031299, ENSMUSG00000020917, ENSMUSG00000022110, ENSMUSG00000004789, ENSMUSG00000019179, ENSMUSG00000005683, ENSMUSG00000052738, ENSMUSG00000020664, ENSMUSG00000000168, ENSMUSG00000030541, ENSMUSG00000027406	2.36294	0.344646	0.00344646
KEGG_PATHWAY	mmu04540:Gap junction	37	0.000283686	ENSMUSG00000041624, ENSMUSG00000024383, ENSMUSG00000033910, ENSMUSG00000021478, ENSMUSG00000023004, ENSMUSG00000019828, ENSMUSG00000045136, ENSMUSG00000034801, ENSMUSG00000020431, ENSMUSG00000024639, ENSMUSG00000052920, ENSMUSG00000039943, ENSMUSG00000035027, ENSMUSG00000050965, ENSMUSG00000022840, ENSMUSG00000058672, ENSMUSG00000052889, ENSMUSG00000026202, ENSMUSG00000025856, ENSMUSG00000029231,…	1.75083	0.349191	0.00349191
KEGG_PATHWAY	mmu04360:Axon guidance	51	0.000325458	ENSMUSG00000001227, ENSMUSG00000029095, ENSMUSG00000029765, ENSMUSG00000020451, ENSMUSG00000028039, ENSMUSG00000022048, ENSMUSG00000079662, ENSMUSG00000001847, ENSMUSG00000031284, ENSMUSG00000052516, ENSMUSG00000025085, ENSMUSG00000027200, ENSMUSG00000022781, ENSMUSG00000028780, ENSMUSG00000060534, ENSMUSG00000028664, ENSMUSG00000028289, ENSMUSG00000020121, ENSMUSG00000055540, ENSMUSG00000059495,…	1.58431	0.400514	0.00400514
KEGG_PATHWAY	mmu04730:Long-term depression	32	0.000409856	ENSMUSG00000041624, ENSMUSG00000001986, ENSMUSG00000033910, ENSMUSG00000019828, ENSMUSG00000001127, ENSMUSG00000002413, ENSMUSG00000005533, ENSMUSG00000024639, ENSMUSG00000007564, ENSMUSG00000052920, ENSMUSG00000039943, ENSMUSG00000035027, ENSMUSG00000050965, ENSMUSG00000020611, ENSMUSG00000031748, ENSMUSG00000052889, ENSMUSG00000042228, ENSMUSG00000051177, ENSMUSG00000027523, ENSMUSG00000000001,…	1.80867	0.504135	0.00504135
KEGG_PATHWAY	mmu04310:Wnt signaling pathway	55	0.000837759	ENSMUSG00000053754, ENSMUSG00000024563, ENSMUSG00000022433, ENSMUSG00000001847, ENSMUSG00000039943, ENSMUSG00000021820, ENSMUSG00000052889, ENSMUSG00000029686, ENSMUSG00000003847, ENSMUSG00000057897, ENSMUSG00000051177, ENSMUSG00000036840, ENSMUSG00000006932, ENSMUSG00000030970, ENSMUSG00000053819, ENSMUSG00000000142, ENSMUSG00000003233, ENSMUSG00000025217, ENSMUSG00000024290, ENSMUSG00000028161,…	1.50217	1.02798	0.0102798
KEGG_PATHWAY	mmu04666:Fc gamma R-mediated phagocytosis	39	0.00116162	ENSMUSG00000029636, ENSMUSG00000052632, ENSMUSG00000025949, ENSMUSG00000020451, ENSMUSG00000001847, ENSMUSG00000006134, ENSMUSG00000028698, ENSMUSG00000001729, ENSMUSG00000026755, ENSMUSG00000050965, ENSMUSG00000020516, ENSMUSG00000022789, ENSMUSG00000052889, ENSMUSG00000029684, ENSMUSG00000042228, ENSMUSG00000021314, ENSMUSG00000026825, ENSMUSG00000004056, ENSMUSG00000024867, ENSMUSG00000069662,…	1.6195	1.42276	0.0142276
KEGG_PATHWAY	mmu04530:Tight junction	50	0.00137902	ENSMUSG00000062825, ENSMUSG00000013076, ENSMUSG00000028053, ENSMUSG00000031012, ENSMUSG00000028906, ENSMUSG00000037815, ENSMUSG00000001729, ENSMUSG00000047230, ENSMUSG00000034868, ENSMUSG00000007564, ENSMUSG00000029580, ENSMUSG00000020536, ENSMUSG00000050965, ENSMUSG00000019978, ENSMUSG00000052889, ENSMUSG00000063063, ENSMUSG00000004056, ENSMUSG00000020315, ENSMUSG00000000159, ENSMUSG00000037625,…	1.50722	1.68695	0.0168695
KEGG_PATHWAY	mmu04012:ErbB signaling pathway	35	0.0017706	ENSMUSG00000020919, ENSMUSG00000031284, ENSMUSG00000001127, ENSMUSG00000034801, ENSMUSG00000002413, ENSMUSG00000006134, ENSMUSG00000022781, ENSMUSG00000024617, ENSMUSG00000028698, ENSMUSG00000001729, ENSMUSG00000035027, ENSMUSG00000050965, ENSMUSG00000020516, ENSMUSG00000021820, ENSMUSG00000033352, ENSMUSG00000052889, ENSMUSG00000004056, ENSMUSG00000022607, ENSMUSG00000034342, ENSMUSG00000057897,…	1.63716	2.16118	0.0216118
KEGG_PATHWAY	mmu04130:SNARE interactions in vesicular transport	19	0.00181522	ENSMUSG00000030805, ENSMUSG00000030806, ENSMUSG00000027522, ENSMUSG00000028879, ENSMUSG00000020946, ENSMUSG00000029125, ENSMUSG00000026696, ENSMUSG00000010110, ENSMUSG00000020894, ENSMUSG00000019998, ENSMUSG00000007207, ENSMUSG00000027879, ENSMUSG00000010392, ENSMUSG00000051412, ENSMUSG00000027273, ENSMUSG00000030337, ENSMUSG00000032757, ENSMUSG00000009894, ENSMUSG00000024983	2.03475	2.21509	0.0221509
KEGG_PATHWAY	mmu03018:RNA degradation	26	0.00251689	ENSMUSG00000046139, ENSMUSG00000036270, ENSMUSG00000034575, ENSMUSG00000036550, ENSMUSG00000004267, ENSMUSG00000033991, ENSMUSG00000000581, ENSMUSG00000021962, ENSMUSG00000031683, ENSMUSG00000022685, ENSMUSG00000026174, ENSMUSG00000027433, ENSMUSG00000020515, ENSMUSG00000016018, ENSMUSG00000034724, ENSMUSG00000025980, ENSMUSG00000027714, ENSMUSG00000035632, ENSMUSG00000032097, ENSMUSG00000024359,…	1.76345	3.05919	0.0305919
KEGG_PATHWAY	mmu04114:Oocyte meiosis	43	0.00257604	ENSMUSG00000004455, ENSMUSG00000021051, ENSMUSG00000029176, ENSMUSG00000025060, ENSMUSG00000020849, ENSMUSG00000018326, ENSMUSG00000041133, ENSMUSG00000019370, ENSMUSG00000020431, ENSMUSG00000024617, ENSMUSG00000005533, ENSMUSG00000007564, ENSMUSG00000038416, ENSMUSG00000031870, ENSMUSG00000036438, ENSMUSG00000022840, ENSMUSG00000021820, ENSMUSG00000051391, ENSMUSG00000017843, ENSMUSG00000014355,…	1.52164	3.13004	0.0313004
KEGG_PATHWAY	mmu04142:Lysosome	44	0.00290961	ENSMUSG00000019302, ENSMUSG00000022453, ENSMUSG00000020198, ENSMUSG00000003033, ENSMUSG00000021686, ENSMUSG00000007891, ENSMUSG00000026944, ENSMUSG00000016534, ENSMUSG00000025579, ENSMUSG00000030560, ENSMUSG00000021824, ENSMUSG00000019087, ENSMUSG00000021665, ENSMUSG00000007038, ENSMUSG00000033379, ENSMUSG00000033793, ENSMUSG00000021477, ENSMUSG00000009090, ENSMUSG00000016256, ENSMUSG00000025232,…	1.50469	3.52868	0.0352868
KEGG_PATHWAY	mmu05213:Endometrial cancer	23	0.00357183	ENSMUSG00000006932, ENSMUSG00000048756, ENSMUSG00000000142, ENSMUSG00000027665, ENSMUSG00000019699, ENSMUSG00000063358, ENSMUSG00000041417, ENSMUSG00000037815, ENSMUSG00000027852, ENSMUSG00000001127, ENSMUSG00000002413, ENSMUSG00000034801, ENSMUSG00000022812, ENSMUSG00000028698, ENSMUSG00000001729, ENSMUSG00000031834, ENSMUSG00000009406, ENSMUSG00000035027, ENSMUSG00000005871, ENSMUSG00000063063,…	1.79997	4.31565	0.0431565
KEGG_PATHWAY	mmu04070:Phosphatidylinositol signaling system	30	0.00448033	ENSMUSG00000025949, ENSMUSG00000036095, ENSMUSG00000026737, ENSMUSG00000022861, ENSMUSG00000041720, ENSMUSG00000019370, ENSMUSG00000038861, ENSMUSG00000028698, ENSMUSG00000039943, ENSMUSG00000050965, ENSMUSG00000030660, ENSMUSG00000036438, ENSMUSG00000022973, ENSMUSG00000052889, ENSMUSG00000030682, ENSMUSG00000024867, ENSMUSG00000051177, ENSMUSG00000001175, ENSMUSG00000038665, ENSMUSG00000027665,…	1.6278	5.3857	0.053857
KEGG_PATHWAY	mmu00640:Propanoate metabolism	15	0.00678185	ENSMUSG00000041650, ENSMUSG00000063229, ENSMUSG00000010025, ENSMUSG00000061838, ENSMUSG00000025745, ENSMUSG00000032527, ENSMUSG00000022110, ENSMUSG00000023921, ENSMUSG00000033429, ENSMUSG00000020532, ENSMUSG00000052738, ENSMUSG00000057880, ENSMUSG00000021238, ENSMUSG00000030246, ENSMUSG00000032047	2.03475	8.04744	0.0804744
GOTERM_BP_5	GO:0044267~cellular protein metabolic process	787	1.53524e-46	ENSMUSG00000026254, ENSMUSG00000024360, ENSMUSG00000025616, ENSMUSG00000019777, ENSMUSG00000032501, ENSMUSG00000073563, ENSMUSG00000060636, ENSMUSG00000019977, ENSMUSG00000046947, ENSMUSG00000025613, ENSMUSG00000048758, ENSMUSG00000025208, ENSMUSG00000029686, ENSMUSG00000022263, ENSMUSG00000020124, ENSMUSG00000052981, ENSMUSG00000019970, ENSMUSG00000020115, ENSMUSG00000020114, ENSMUSG00000047635,…	1.51259	2.6845e-43	2.6845e-45
GOTERM_BP_5	GO:0015031~protein transport	281	1.39042e-25	ENSMUSG00000000131, ENSMUSG00000025793, ENSMUSG00000020128, ENSMUSG00000053799, ENSMUSG00000039367, ENSMUSG00000042590, ENSMUSG00000036435, ENSMUSG00000032504, ENSMUSG00000034826, ENSMUSG00000006058, ENSMUSG00000030643, ENSMUSG00000032258, ENSMUSG00000027255, ENSMUSG00000061244, ENSMUSG00000033475, ENSMUSG00000034187, ENSMUSG00000019971, ENSMUSG00000051984, ENSMUSG00000021139, ENSMUSG00000030534,…	1.73222	2.43128e-22	2.43128e-24
GOTERM_BP_5	GO:0006397~mRNA processing	136	5.68798e-21	ENSMUSG00000029817, ENSMUSG00000024268, ENSMUSG00000028382, ENSMUSG00000032580, ENSMUSG00000031311, ENSMUSG00000041777, ENSMUSG00000034931, ENSMUSG00000002455, ENSMUSG00000031256, ENSMUSG00000038611, ENSMUSG00000027763, ENSMUSG00000020409, ENSMUSG00000029169, ENSMUSG00000025580, ENSMUSG00000036698, ENSMUSG00000006651, ENSMUSG00000031590, ENSMUSG00000002524, ENSMUSG00000022774, ENSMUSG00000038374,…	2.08313	9.94596e-18	9.94596e-20
GOTERM_BP_5	GO:0006886~intracellular protein transport	140	2.19715e-20	ENSMUSG00000078974, ENSMUSG00000000131, ENSMUSG00000041670, ENSMUSG00000029430, ENSMUSG00000025793, ENSMUSG00000069631, ENSMUSG00000039367, ENSMUSG00000042590, ENSMUSG00000047187, ENSMUSG00000034826, ENSMUSG00000021929, ENSMUSG00000028649, ENSMUSG00000029020, ENSMUSG00000021824, ENSMUSG00000022841, ENSMUSG00000032042, ENSMUSG00000020671, ENSMUSG00000020986, ENSMUSG00000021139, ENSMUSG00000030058,…	2.03562	3.84192e-17	3.84192e-19
GOTERM_BP_5	GO:0006464~protein modification process	450	8.2605e-20	ENSMUSG00000024360, ENSMUSG00000025616, ENSMUSG00000019777, ENSMUSG00000028700, ENSMUSG00000026393, ENSMUSG00000028909, ENSMUSG00000032501, ENSMUSG00000073563, ENSMUSG00000046947, ENSMUSG00000028708, ENSMUSG00000022263, ENSMUSG00000052981, ENSMUSG00000019970, ENSMUSG00000021116, ENSMUSG00000035293, ENSMUSG00000020115, ENSMUSG00000020114, ENSMUSG00000027642, ENSMUSG00000022111, ENSMUSG00000052833,…	1.43324	1.44442e-16	1.44442e-18
GOTERM_BP_5	GO:0016070~RNA metabolic process	268	1.06551e-19	ENSMUSG00000002658, ENSMUSG00000024268, ENSMUSG00000031783, ENSMUSG00000053286, ENSMUSG00000035575, ENSMUSG00000001909, ENSMUSG00000031256, ENSMUSG00000027763, ENSMUSG00000020409, ENSMUSG00000029169, ENSMUSG00000025782, ENSMUSG00000036698, ENSMUSG00000006651, ENSMUSG00000037805, ENSMUSG00000002524, ENSMUSG00000022774, ENSMUSG00000039166, ENSMUSG00000036693, ENSMUSG00000024604, ENSMUSG00000021500,…	1.62463	1.86314e-16	1.86314e-18
GOTERM_BP_5	GO:0016071~mRNA metabolic process	147	3.04442e-19	ENSMUSG00000029817, ENSMUSG00000024268, ENSMUSG00000028382, ENSMUSG00000032580, ENSMUSG00000031311, ENSMUSG00000041777, ENSMUSG00000034931, ENSMUSG00000002455, ENSMUSG00000031256, ENSMUSG00000038611, ENSMUSG00000027763, ENSMUSG00000020409, ENSMUSG00000029169, ENSMUSG00000025580, ENSMUSG00000036698, ENSMUSG00000006651, ENSMUSG00000031590, ENSMUSG00000002524, ENSMUSG00000022774, ENSMUSG00000038374,…	1.95339	5.32345e-16	5.32345e-18
GOTERM_BP_5	GO:0008380~RNA splicing	109	8.61009e-19	ENSMUSG00000029817, ENSMUSG00000024268, ENSMUSG00000031311, ENSMUSG00000032580, ENSMUSG00000041777, ENSMUSG00000034931, ENSMUSG00000002455, ENSMUSG00000027763, ENSMUSG00000020409, ENSMUSG00000029169, ENSMUSG00000025580, ENSMUSG00000031590, ENSMUSG00000002524, ENSMUSG00000022774, ENSMUSG00000038374, ENSMUSG00000019432, ENSMUSG00000028639, ENSMUSG00000024604, ENSMUSG00000029427, ENSMUSG00000021500,…	2.17625	1.50555e-15	1.50555e-17
GOTERM_BP_5	GO:0030163~protein catabolic process	227	2.71941e-17	ENSMUSG00000030254, ENSMUSG00000029176, ENSMUSG00000025616, ENSMUSG00000022124, ENSMUSG00000025103, ENSMUSG00000051234, ENSMUSG00000032905, ENSMUSG00000038416, ENSMUSG00000041058, ENSMUSG00000029686, ENSMUSG00000020124, ENSMUSG00000052981, ENSMUSG00000006392, ENSMUSG00000028309, ENSMUSG00000035293, ENSMUSG00000025217, ENSMUSG00000020114, ENSMUSG00000035299, ENSMUSG00000038429, ENSMUSG00000022111,…	1.63843	4.75514e-14	4.75514e-16
GOTERM_BP_5	GO:0006396~RNA processing	188	3.84014e-17	ENSMUSG00000029817, ENSMUSG00000024268, ENSMUSG00000028382, ENSMUSG00000032580, ENSMUSG00000031311, ENSMUSG00000053286, ENSMUSG00000029439, ENSMUSG00000026127, ENSMUSG00000041777, ENSMUSG00000035575, ENSMUSG00000034931, ENSMUSG00000037376, ENSMUSG00000002455, ENSMUSG00000001909, ENSMUSG00000031256, ENSMUSG00000021595, ENSMUSG00000038611, ENSMUSG00000027763, ENSMUSG00000060739, ENSMUSG00000020409,…	1.72645	6.71483e-14	6.71483e-16
GOTERM_BP_5	GO:0043632~modification-dependent macromolecule catabolic process	211	4.32516e-17	ENSMUSG00000030254, ENSMUSG00000029176, ENSMUSG00000025616, ENSMUSG00000022124, ENSMUSG00000025103, ENSMUSG00000051234, ENSMUSG00000032905, ENSMUSG00000038416, ENSMUSG00000041058, ENSMUSG00000029686, ENSMUSG00000020124, ENSMUSG00000006392, ENSMUSG00000052981, ENSMUSG00000028309, ENSMUSG00000035293, ENSMUSG00000020114, ENSMUSG00000035299, ENSMUSG00000038429, ENSMUSG00000022111, ENSMUSG00000033364,…	1.66685	7.56293e-14	7.56293e-16
GOTERM_BP_5	GO:0044257~cellular protein catabolic process	219	2.30265e-16	ENSMUSG00000030254, ENSMUSG00000029176, ENSMUSG00000025616, ENSMUSG00000022124, ENSMUSG00000025103, ENSMUSG00000051234, ENSMUSG00000032905, ENSMUSG00000038416, ENSMUSG00000041058, ENSMUSG00000029686, ENSMUSG00000020124, ENSMUSG00000052981, ENSMUSG00000006392, ENSMUSG00000028309, ENSMUSG00000035293, ENSMUSG00000020114, ENSMUSG00000035299, ENSMUSG00000038429, ENSMUSG00000022111, ENSMUSG00000033364,…	1.63662	3.88578e-13	3.88578e-15
GOTERM_BP_5	GO:0007268~synaptic transmission	93	1.05101e-14	ENSMUSG00000021071, ENSMUSG00000070570, ENSMUSG00000026986, ENSMUSG00000047879, ENSMUSG00000024261, ENSMUSG00000025892, ENSMUSG00000021557, ENSMUSG00000022594, ENSMUSG00000020436, ENSMUSG00000056755, ENSMUSG00000017412, ENSMUSG00000059003, ENSMUSG00000009394, ENSMUSG00000002341, ENSMUSG00000000416, ENSMUSG00000003378, ENSMUSG00000032773, ENSMUSG00000030317, ENSMUSG00000033676, ENSMUSG00000003279,…	2.09672	1.84408e-11	1.84408e-13
GOTERM_BP_5	GO:0006412~translation	141	5.54064e-14	ENSMUSG00000029610, ENSMUSG00000032399, ENSMUSG00000025967, ENSMUSG00000030738, ENSMUSG00000026254, ENSMUSG00000024360, ENSMUSG00000018858, ENSMUSG00000025794, ENSMUSG00000000740, ENSMUSG00000071415, ENSMUSG00000067194, ENSMUSG00000028156, ENSMUSG00000060636, ENSMUSG00000081094, ENSMUSG00000019977, ENSMUSG00000037376, ENSMUSG00000020477, ENSMUSG00000029028, ENSMUSG00000025208, ENSMUSG00000048758,…	1.77381	9.6867e-11	9.6867e-13
GOTERM_BP_5	GO:0016310~phosphorylation	263	7.73328e-13	ENSMUSG00000025204, ENSMUSG00000026393, ENSMUSG00000001127, ENSMUSG00000064345, ENSMUSG00000006057, ENSMUSG00000032501, ENSMUSG00000022781, ENSMUSG00000073563, ENSMUSG00000030397, ENSMUSG00000046947, ENSMUSG00000028708, ENSMUSG00000022956, ENSMUSG00000022788, ENSMUSG00000033379, ENSMUSG00000022263, ENSMUSG00000019970, ENSMUSG00000021116, ENSMUSG00000024789, ENSMUSG00000020115, ENSMUSG00000025781,…	1.46997	1.35233e-09	1.35233e-11
GOTERM_BP_5	GO:0016568~chromatin modification	108	4.65899e-12	ENSMUSG00000028053, ENSMUSG00000068457, ENSMUSG00000025616, ENSMUSG00000038384, ENSMUSG00000026739, ENSMUSG00000019777, ENSMUSG00000018501, ENSMUSG00000031715, ENSMUSG00000031314, ENSMUSG00000034245, ENSMUSG00000028309, ENSMUSG00000020387, ENSMUSG00000029505, ENSMUSG00000037876, ENSMUSG00000004698, ENSMUSG00000026313, ENSMUSG00000006456, ENSMUSG00000059325, ENSMUSG00000037369, ENSMUSG00000027304,…	1.83649	8.14658e-09	8.14658e-11
GOTERM_BP_5	GO:0007269~neurotransmitter secretion	28	3.755e-10	ENSMUSG00000022568, ENSMUSG00000021071, ENSMUSG00000037217, ENSMUSG00000024261, ENSMUSG00000004113, ENSMUSG00000009394, ENSMUSG00000033615, ENSMUSG00000022973, ENSMUSG00000019906, ENSMUSG00000030317, ENSMUSG00000027273, ENSMUSG00000063887, ENSMUSG00000066392, ENSMUSG00000061601, ENSMUSG00000030805, ENSMUSG00000033768, ENSMUSG00000023192, ENSMUSG00000034656, ENSMUSG00000020894, ENSMUSG00000027162,…	3.12128	6.56597e-07	6.56597e-09
GOTERM_BP_5	GO:0006457~protein folding	65	4.72503e-10	ENSMUSG00000019428, ENSMUSG00000071866, ENSMUSG00000021037, ENSMUSG00000003226, ENSMUSG00000030357, ENSMUSG00000015656, ENSMUSG00000056629, ENSMUSG00000029781, ENSMUSG00000005981, ENSMUSG00000066151, ENSMUSG00000039233, ENSMUSG00000025613, ENSMUSG00000074212, ENSMUSG00000025757, ENSMUSG00000021870, ENSMUSG00000042133, ENSMUSG00000020949, ENSMUSG00000001134, ENSMUSG00000024359, ENSMUSG00000022771,…	2.05394	8.26214e-07	8.26214e-09
GOTERM_BP_5	GO:0051056~regulation of small GTPase mediated signal transduction	100	5.74738e-10	ENSMUSG00000031442, ENSMUSG00000041115, ENSMUSG00000027652, ENSMUSG00000022508, ENSMUSG00000027255, ENSMUSG00000022788, ENSMUSG00000039844, ENSMUSG00000027581, ENSMUSG00000022263, ENSMUSG00000042303, ENSMUSG00000035437, ENSMUSG00000049044, ENSMUSG00000029602, ENSMUSG00000031453, ENSMUSG00000031511, ENSMUSG00000017631, ENSMUSG00000039621, ENSMUSG00000062232, ENSMUSG00000050310, ENSMUSG00000030465,…	1.76012	1.00498e-06	1.00498e-08
GOTERM_BP_5	GO:0006605~protein targeting	66	1.76854e-09	ENSMUSG00000055334, ENSMUSG00000000131, ENSMUSG00000078974, ENSMUSG00000029430, ENSMUSG00000069631, ENSMUSG00000042590, ENSMUSG00000020849, ENSMUSG00000034826, ENSMUSG00000021929, ENSMUSG00000028649, ENSMUSG00000029020, ENSMUSG00000027099, ENSMUSG00000067150, ENSMUSG00000032042, ENSMUSG00000002496, ENSMUSG00000031922, ENSMUSG00000021139, ENSMUSG00000008450, ENSMUSG00000024789, ENSMUSG00000019433,…	1.99145	3.09245e-06	3.09245e-08
GOTERM_BP_5	GO:0051169~nuclear transport	52	6.66648e-09	ENSMUSG00000055334, ENSMUSG00000000131, ENSMUSG00000029430, ENSMUSG00000069631, ENSMUSG00000042590, ENSMUSG00000028676, ENSMUSG00000034826, ENSMUSG00000021929, ENSMUSG00000067150, ENSMUSG00000002496, ENSMUSG00000031922, ENSMUSG00000057113, ENSMUSG00000022538, ENSMUSG00000008450, ENSMUSG00000024789, ENSMUSG00000028161, ENSMUSG00000022774, ENSMUSG00000028330, ENSMUSG00000009470, ENSMUSG00000024359,…	2.12939	1.16569e-05	1.16569e-07
GOTERM_BP_5	GO:0006913~nucleocytoplasmic transport	51	9.03035e-09	ENSMUSG00000055334, ENSMUSG00000000131, ENSMUSG00000029430, ENSMUSG00000069631, ENSMUSG00000042590, ENSMUSG00000028676, ENSMUSG00000034826, ENSMUSG00000021929, ENSMUSG00000067150, ENSMUSG00000002496, ENSMUSG00000031922, ENSMUSG00000057113, ENSMUSG00000022538, ENSMUSG00000008450, ENSMUSG00000024789, ENSMUSG00000028161, ENSMUSG00000022774, ENSMUSG00000028330, ENSMUSG00000009470, ENSMUSG00000024359,…	2.13195	1.57904e-05	1.57904e-07
GOTERM_BP_5	GO:0050804~regulation of synaptic transmission	52	1.61946e-08	ENSMUSG00000033208, ENSMUSG00000048482, ENSMUSG00000041670, ENSMUSG00000020886, ENSMUSG00000062995, ENSMUSG00000054814, ENSMUSG00000059003, ENSMUSG00000037996, ENSMUSG00000003378, ENSMUSG00000051790, ENSMUSG00000031144, ENSMUSG00000028161, ENSMUSG00000034656, ENSMUSG00000019433, ENSMUSG00000028833, ENSMUSG00000025586, ENSMUSG00000024393, ENSMUSG00000032336, ENSMUSG00000025889, ENSMUSG00000019969,…	2.0868	2.83177e-05	2.83177e-07
GOTERM_BP_5	GO:0051969~regulation of transmission of nerve impulse	54	3.08818e-08	ENSMUSG00000033208, ENSMUSG00000048482, ENSMUSG00000041670, ENSMUSG00000020886, ENSMUSG00000062995, ENSMUSG00000054814, ENSMUSG00000059003, ENSMUSG00000037996, ENSMUSG00000003378, ENSMUSG00000051790, ENSMUSG00000031144, ENSMUSG00000028833, ENSMUSG00000028161, ENSMUSG00000034656, ENSMUSG00000019433, ENSMUSG00000025586, ENSMUSG00000024393, ENSMUSG00000032336, ENSMUSG00000025889, ENSMUSG00000019969,…	2.02529	5.39996e-05	5.39996e-07
GOTERM_BP_5	GO:0031644~regulation of neurological system process	56	3.70643e-08	ENSMUSG00000033208, ENSMUSG00000048482, ENSMUSG00000041670, ENSMUSG00000019828, ENSMUSG00000020886, ENSMUSG00000062995, ENSMUSG00000054814, ENSMUSG00000059003, ENSMUSG00000037996, ENSMUSG00000003378, ENSMUSG00000051790, ENSMUSG00000031144, ENSMUSG00000028833, ENSMUSG00000028161, ENSMUSG00000034656, ENSMUSG00000019433, ENSMUSG00000025586, ENSMUSG00000024393, ENSMUSG00000032336, ENSMUSG00000025889,…	1.98878	6.48103e-05	6.48103e-07
GOTERM_BP_5	GO:0010608~posttranscriptional regulation of gene expression	68	4.88633e-08	ENSMUSG00000024423, ENSMUSG00000001424, ENSMUSG00000026254, ENSMUSG00000031167, ENSMUSG00000037058, ENSMUSG00000028156, ENSMUSG00000005610, ENSMUSG00000032293, ENSMUSG00000052707, ENSMUSG00000028708, ENSMUSG00000037376, ENSMUSG00000048696, ENSMUSG00000039782, ENSMUSG00000028580, ENSMUSG00000030068, ENSMUSG00000027002, ENSMUSG00000021116, ENSMUSG00000025580, ENSMUSG00000036698, ENSMUSG00000003235,…	1.84385	8.54418e-05	8.54418e-07
GOTERM_BP_5	GO:0032940~secretion by cell	80	9.81667e-08	ENSMUSG00000024563, ENSMUSG00000021071, ENSMUSG00000048482, ENSMUSG00000041670, ENSMUSG00000029616, ENSMUSG00000017978, ENSMUSG00000024261, ENSMUSG00000053799, ENSMUSG00000040722, ENSMUSG00000036435, ENSMUSG00000032872, ENSMUSG00000021357, ENSMUSG00000020536, ENSMUSG00000038453, ENSMUSG00000009394, ENSMUSG00000061244, ENSMUSG00000051412, ENSMUSG00000030317, ENSMUSG00000051331, ENSMUSG00000066392,…	1.72606	0.000171653	1.71653e-06
GOTERM_BP_5	GO:0001505~regulation of neurotransmitter levels	36	1.11305e-07	ENSMUSG00000022568, ENSMUSG00000037217, ENSMUSG00000021071, ENSMUSG00000028964, ENSMUSG00000070570, ENSMUSG00000026986, ENSMUSG00000024261, ENSMUSG00000021557, ENSMUSG00000004113, ENSMUSG00000009394, ENSMUSG00000033615, ENSMUSG00000022973, ENSMUSG00000030317, ENSMUSG00000019906, ENSMUSG00000063887, ENSMUSG00000027273, ENSMUSG00000066392, ENSMUSG00000061601, ENSMUSG00000033768, ENSMUSG00000030805,…	2.33018	0.000194627	1.94627e-06
GOTERM_BP_5	GO:0031175~neuron projection development	90	1.40167e-07	ENSMUSG00000048482, ENSMUSG00000029516, ENSMUSG00000021662, ENSMUSG00000001847, ENSMUSG00000017485, ENSMUSG00000052516, ENSMUSG00000029512, ENSMUSG00000033066, ENSMUSG00000050896, ENSMUSG00000043733, ENSMUSG00000039233, ENSMUSG00000060534, ENSMUSG00000022995, ENSMUSG00000028289, ENSMUSG00000041362, ENSMUSG00000027581, ENSMUSG00000022601, ENSMUSG00000022607, ENSMUSG00000031391, ENSMUSG00000022636,…	1.65678	0.000245095	2.45095e-06
GOTERM_BP_5	GO:0006417~regulation of translation	49	4.56419e-07	ENSMUSG00000062078, ENSMUSG00000024423, ENSMUSG00000016510, ENSMUSG00000026254, ENSMUSG00000025571, ENSMUSG00000028156, ENSMUSG00000037058, ENSMUSG00000005610, ENSMUSG00000032293, ENSMUSG00000009549, ENSMUSG00000001729, ENSMUSG00000052707, ENSMUSG00000020459, ENSMUSG00000028760, ENSMUSG00000028708, ENSMUSG00000025364, ENSMUSG00000031668, ENSMUSG00000037376, ENSMUSG00000039782, ENSMUSG00000028580,…	1.96641	0.000798087	7.98087e-06
GOTERM_BP_5	GO:0007611~learning or memory	45	4.81971e-07	ENSMUSG00000033208, ENSMUSG00000025855, ENSMUSG00000037032, ENSMUSG00000048482, ENSMUSG00000040907, ENSMUSG00000029838, ENSMUSG00000021478, ENSMUSG00000038418, ENSMUSG00000020431, ENSMUSG00000022681, ENSMUSG00000056755, ENSMUSG00000028664, ENSMUSG00000059003, ENSMUSG00000037996, ENSMUSG00000022973, ENSMUSG00000022240, ENSMUSG00000021314, ENSMUSG00000025485, ENSMUSG00000008892, ENSMUSG00000051331,…	2.02909	0.000842767	8.42767e-06
GOTERM_BP_5	GO:0051246~regulation of protein metabolic process	129	6.97006e-07	ENSMUSG00000032307, ENSMUSG00000026254, ENSMUSG00000018501, ENSMUSG00000028156, ENSMUSG00000037058, ENSMUSG00000052707, ENSMUSG00000028708, ENSMUSG00000022788, ENSMUSG00000037376, ENSMUSG00000016481, ENSMUSG00000052155, ENSMUSG00000042303, ENSMUSG00000028580, ENSMUSG00000052981, ENSMUSG00000030068, ENSMUSG00000049044, ENSMUSG00000021116, ENSMUSG00000025580, ENSMUSG00000025939, ENSMUSG00000036698,…	1.47489	0.00121877	1.21877e-05
GOTERM_BP_5	GO:0048489~synaptic vesicle transport	21	7.22146e-07	ENSMUSG00000030805, ENSMUSG00000022568, ENSMUSG00000006932, ENSMUSG00000021071, ENSMUSG00000034799, ENSMUSG00000024261, ENSMUSG00000020886, ENSMUSG00000026797, ENSMUSG00000020894, ENSMUSG00000025889, ENSMUSG00000035392, ENSMUSG00000007207, ENSMUSG00000022973, ENSMUSG00000019969, ENSMUSG00000033615, ENSMUSG00000021314, ENSMUSG00000019906, ENSMUSG00000063887, ENSMUSG00000029608, ENSMUSG00000053025,…	2.90602	0.00126273	1.26273e-05
GOTERM_BP_5	GO:0006887~exocytosis	52	7.76271e-07	ENSMUSG00000021071, ENSMUSG00000041670, ENSMUSG00000017978, ENSMUSG00000040722, ENSMUSG00000053799, ENSMUSG00000036435, ENSMUSG00000021357, ENSMUSG00000020536, ENSMUSG00000038453, ENSMUSG00000061244, ENSMUSG00000051412, ENSMUSG00000051331, ENSMUSG00000049044, ENSMUSG00000030805, ENSMUSG00000030534, ENSMUSG00000033769, ENSMUSG00000034656, ENSMUSG00000020900, ENSMUSG00000056050, ENSMUSG00000019969,…	1.89709	0.00135737	1.35737e-05
GOTERM_BP_5	GO:0043623~cellular protein complex assembly	51	1.04805e-06	ENSMUSG00000039361, ENSMUSG00000000131, ENSMUSG00000030357, ENSMUSG00000042590, ENSMUSG00000033066, ENSMUSG00000027253, ENSMUSG00000039233, ENSMUSG00000058672, ENSMUSG00000000416, ENSMUSG00000003378, ENSMUSG00000022607, ENSMUSG00000001525, ENSMUSG00000034480, ENSMUSG00000015733, ENSMUSG00000034656, ENSMUSG00000024456, ENSMUSG00000072115, ENSMUSG00000009470, ENSMUSG00000039959, ENSMUSG00000073131,…	1.89507	0.00183259	1.83259e-05
GOTERM_BP_5	GO:0006606~protein import into nucleus	32	1.05543e-06	ENSMUSG00000055334, ENSMUSG00000000131, ENSMUSG00000029430, ENSMUSG00000001440, ENSMUSG00000022100, ENSMUSG00000021478, ENSMUSG00000042590, ENSMUSG00000036986, ENSMUSG00000021929, ENSMUSG00000018362, ENSMUSG00000020315, ENSMUSG00000002496, ENSMUSG00000027782, ENSMUSG00000031922, ENSMUSG00000008450, ENSMUSG00000024789, ENSMUSG00000028161, ENSMUSG00000009470, ENSMUSG00000003731, ENSMUSG00000068742,…	2.29319	0.00184549	1.84549e-05
GOTERM_BP_5	GO:0032990~cell part morphogenesis	85	1.37268e-06	ENSMUSG00000048482, ENSMUSG00000021662, ENSMUSG00000001847, ENSMUSG00000017485, ENSMUSG00000052516, ENSMUSG00000029512, ENSMUSG00000033066, ENSMUSG00000021669, ENSMUSG00000029020, ENSMUSG00000050896, ENSMUSG00000043733, ENSMUSG00000039233, ENSMUSG00000060534, ENSMUSG00000022995, ENSMUSG00000028289, ENSMUSG00000041362, ENSMUSG00000022601, ENSMUSG00000022607, ENSMUSG00000031391, ENSMUSG00000022636,…	1.60902	0.00240023	2.40023e-05
GOTERM_BP_5	GO:0043087~regulation of GTPase activity	45	2.22389e-06	ENSMUSG00000023353, ENSMUSG00000052302, ENSMUSG00000022568, ENSMUSG00000052632, ENSMUSG00000042203, ENSMUSG00000011877, ENSMUSG00000022508, ENSMUSG00000027575, ENSMUSG00000032870, ENSMUSG00000025422, ENSMUSG00000025531, ENSMUSG00000036644, ENSMUSG00000027255, ENSMUSG00000026159, ENSMUSG00000037999, ENSMUSG00000036473, ENSMUSG00000026155, ENSMUSG00000027581, ENSMUSG00000002496, ENSMUSG00000035437,…	1.94181	0.0038886	3.8886e-05
GOTERM_BP_5	GO:0051493~regulation of cytoskeleton organization	47	2.46955e-06	ENSMUSG00000015222, ENSMUSG00000020476, ENSMUSG00000049775, ENSMUSG00000001847, ENSMUSG00000026341, ENSMUSG00000018411, ENSMUSG00000026755, ENSMUSG00000079523, ENSMUSG00000023022, ENSMUSG00000033392, ENSMUSG00000027254, ENSMUSG00000073542, ENSMUSG00000057738, ENSMUSG00000028745, ENSMUSG00000052727, ENSMUSG00000005871, ENSMUSG00000043079, ENSMUSG00000000416, ENSMUSG00000027581, ENSMUSG00000020315,…	1.9052	0.00431815	4.31815e-05
GOTERM_BP_5	GO:0033365~protein localization in organelle	46	3.3369e-06	ENSMUSG00000029198, ENSMUSG00000055334, ENSMUSG00000039016, ENSMUSG00000000131, ENSMUSG00000029430, ENSMUSG00000001440, ENSMUSG00000022100, ENSMUSG00000021478, ENSMUSG00000042590, ENSMUSG00000024580, ENSMUSG00000079108, ENSMUSG00000036986, ENSMUSG00000009549, ENSMUSG00000021929, ENSMUSG00000028649, ENSMUSG00000029020, ENSMUSG00000027099, ENSMUSG00000018362, ENSMUSG00000032042, ENSMUSG00000020315,…	1.90311	0.00583471	5.83471e-05
GOTERM_BP_5	GO:0006897~endocytosis	76	3.68984e-06	ENSMUSG00000040276, ENSMUSG00000039361, ENSMUSG00000020476, ENSMUSG00000020375, ENSMUSG00000001847, ENSMUSG00000020886, ENSMUSG00000029512, ENSMUSG00000024924, ENSMUSG00000031214, ENSMUSG00000066151, ENSMUSG00000028488, ENSMUSG00000027253, ENSMUSG00000017670, ENSMUSG00000041112, ENSMUSG00000021314, ENSMUSG00000051412, ENSMUSG00000036103, ENSMUSG00000035203, ENSMUSG00000024772, ENSMUSG00000009090,…	1.62231	0.00645183	6.45183e-05
GOTERM_BP_5	GO:0048812~neuron projection morphogenesis	72	4.16651e-06	ENSMUSG00000048482, ENSMUSG00000021662, ENSMUSG00000001847, ENSMUSG00000017485, ENSMUSG00000029512, ENSMUSG00000052516, ENSMUSG00000033066, ENSMUSG00000050896, ENSMUSG00000039233, ENSMUSG00000043733, ENSMUSG00000060534, ENSMUSG00000022995, ENSMUSG00000028289, ENSMUSG00000041362, ENSMUSG00000022601, ENSMUSG00000022607, ENSMUSG00000031391, ENSMUSG00000022636, ENSMUSG00000045103, ENSMUSG00000034656,…	1.64171	0.00728528	7.28528e-05
GOTERM_BP_5	GO:0009966~regulation of signal transduction	215	5.48385e-06	ENSMUSG00000019775, ENSMUSG00000021109, ENSMUSG00000022508, ENSMUSG00000027652, ENSMUSG00000037815, ENSMUSG00000018501, ENSMUSG00000032501, ENSMUSG00000027253, ENSMUSG00000027255, ENSMUSG00000022500, ENSMUSG00000022788, ENSMUSG00000025485, ENSMUSG00000022263, ENSMUSG00000042303, ENSMUSG00000035437, ENSMUSG00000031391, ENSMUSG00000031511, ENSMUSG00000024789, ENSMUSG00000017631, ENSMUSG00000000142,…	1.30531	0.00958858	9.58858e-05
GOTERM_BP_5	GO:0022604~regulation of cell morphogenesis	45	8.82199e-06	ENSMUSG00000024563, ENSMUSG00000040785, ENSMUSG00000029634, ENSMUSG00000029516, ENSMUSG00000059146, ENSMUSG00000028906, ENSMUSG00000029512, ENSMUSG00000052516, ENSMUSG00000033066, ENSMUSG00000066129, ENSMUSG00000018411, ENSMUSG00000028664, ENSMUSG00000020611, ENSMUSG00000019978, ENSMUSG00000020458, ENSMUSG00000026193, ENSMUSG00000052298, ENSMUSG00000022607, ENSMUSG00000022443, ENSMUSG00000050587,…	1.86174	0.0154249	0.000154249
GOTERM_BP_5	GO:0048858~cell projection morphogenesis	79	9.97115e-06	ENSMUSG00000048482, ENSMUSG00000021662, ENSMUSG00000001847, ENSMUSG00000017485, ENSMUSG00000052516, ENSMUSG00000029512, ENSMUSG00000033066, ENSMUSG00000050896, ENSMUSG00000043733, ENSMUSG00000039233, ENSMUSG00000060534, ENSMUSG00000022995, ENSMUSG00000028289, ENSMUSG00000041362, ENSMUSG00000022601, ENSMUSG00000022607, ENSMUSG00000031391, ENSMUSG00000022636, ENSMUSG00000045103, ENSMUSG00000034656,…	1.56947	0.017434	0.00017434
GOTERM_BP_5	GO:0050658~RNA transport	33	2.83382e-05	ENSMUSG00000062078, ENSMUSG00000003226, ENSMUSG00000008301, ENSMUSG00000052798, ENSMUSG00000022100, ENSMUSG00000024287, ENSMUSG00000028676, ENSMUSG00000034826, ENSMUSG00000057113, ENSMUSG00000025134, ENSMUSG00000025580, ENSMUSG00000016619, ENSMUSG00000030188, ENSMUSG00000022774, ENSMUSG00000038374, ENSMUSG00000042271, ENSMUSG00000028330, ENSMUSG00000019432, ENSMUSG00000029405, ENSMUSG00000026491,…	2.00654	0.0495404	0.000495404
GOTERM_BP_5	GO:0050657~nucleic acid transport	33	2.83382e-05	ENSMUSG00000062078, ENSMUSG00000003226, ENSMUSG00000008301, ENSMUSG00000052798, ENSMUSG00000022100, ENSMUSG00000024287, ENSMUSG00000028676, ENSMUSG00000034826, ENSMUSG00000057113, ENSMUSG00000025134, ENSMUSG00000025580, ENSMUSG00000016619, ENSMUSG00000030188, ENSMUSG00000022774, ENSMUSG00000038374, ENSMUSG00000042271, ENSMUSG00000028330, ENSMUSG00000019432, ENSMUSG00000029405, ENSMUSG00000026491,…	2.00654	0.0495404	0.000495404
GOTERM_BP_5	GO:0007242~intracellular signaling cascade	281	2.96552e-05	ENSMUSG00000050711, ENSMUSG00000022508, ENSMUSG00000015968, ENSMUSG00000001127, ENSMUSG00000030643, ENSMUSG00000024639, ENSMUSG00000039943, ENSMUSG00000028708, ENSMUSG00000022788, ENSMUSG00000020121, ENSMUSG00000022263, ENSMUSG00000042303, ENSMUSG00000021139, ENSMUSG00000031511, ENSMUSG00000053291, ENSMUSG00000017631, ENSMUSG00000024789, ENSMUSG00000027500, ENSMUSG00000033629, ENSMUSG00000062232,…	1.23243	0.0518421	0.000518421
GOTERM_BP_5	GO:0007409~axonogenesis	65	3.32668e-05	ENSMUSG00000048482, ENSMUSG00000021662, ENSMUSG00000001847, ENSMUSG00000017485, ENSMUSG00000029512, ENSMUSG00000052516, ENSMUSG00000050896, ENSMUSG00000039233, ENSMUSG00000043733, ENSMUSG00000022995, ENSMUSG00000060534, ENSMUSG00000028289, ENSMUSG00000041362, ENSMUSG00000022601, ENSMUSG00000022607, ENSMUSG00000031391, ENSMUSG00000022636, ENSMUSG00000032532, ENSMUSG00000021066, ENSMUSG00000020900,…	1.60031	0.058154	0.00058154
GOTERM_BP_5	GO:0048666~neuron development	104	4.13131e-05	ENSMUSG00000029516, ENSMUSG00000001847, ENSMUSG00000029512, ENSMUSG00000033066, ENSMUSG00000024639, ENSMUSG00000039233, ENSMUSG00000038417, ENSMUSG00000060534, ENSMUSG00000041362, ENSMUSG00000056579, ENSMUSG00000027581, ENSMUSG00000019971, ENSMUSG00000031391, ENSMUSG00000022636, ENSMUSG00000002900, ENSMUSG00000021066, ENSMUSG00000020900, ENSMUSG00000028832, ENSMUSG00000022055, ENSMUSG00000026442,…	1.42932	0.0722151	0.000722151
GOTERM_BP_5	GO:0051494~negative regulation of cytoskeleton organization	26	4.6612e-05	ENSMUSG00000015222, ENSMUSG00000032479, ENSMUSG00000015733, ENSMUSG00000020476, ENSMUSG00000058587, ENSMUSG00000070372, ENSMUSG00000035299, ENSMUSG00000049775, ENSMUSG00000027479, ENSMUSG00000028832, ENSMUSG00000045092, ENSMUSG00000018411, ENSMUSG00000079523, ENSMUSG00000023022, ENSMUSG00000033392, ENSMUSG00000027254, ENSMUSG00000026879, ENSMUSG00000057738, ENSMUSG00000028745, ENSMUSG00000052727,…	2.17375	0.0814741	0.000814741
GOTERM_BP_5	GO:0007270~nerve-nerve synaptic transmission	18	6.13205e-05	ENSMUSG00000028964, ENSMUSG00000023192, ENSMUSG00000034656, ENSMUSG00000021478, ENSMUSG00000020402, ENSMUSG00000025889, ENSMUSG00000017412, ENSMUSG00000056073, ENSMUSG00000038128, ENSMUSG00000026959, ENSMUSG00000003378, ENSMUSG00000026024, ENSMUSG00000033676, ENSMUSG00000003974, ENSMUSG00000063077, ENSMUSG00000008892, ENSMUSG00000028020, ENSMUSG00000032186	2.57984	0.10717	0.0010717
GOTERM_BP_5	GO:0048667~cell morphogenesis involved in neuron differentiation	70	6.26229e-05	ENSMUSG00000048482, ENSMUSG00000021662, ENSMUSG00000001847, ENSMUSG00000017485, ENSMUSG00000029512, ENSMUSG00000052516, ENSMUSG00000050896, ENSMUSG00000039233, ENSMUSG00000043733, ENSMUSG00000060534, ENSMUSG00000022995, ENSMUSG00000028289, ENSMUSG00000041362, ENSMUSG00000022601, ENSMUSG00000022607, ENSMUSG00000031391, ENSMUSG00000022636, ENSMUSG00000034656, ENSMUSG00000032532, ENSMUSG00000021066,…	1.54349	0.109445	0.00109445
GOTERM_BP_5	GO:0032271~regulation of protein polymerization	29	6.58486e-05	ENSMUSG00000020476, ENSMUSG00000001847, ENSMUSG00000049775, ENSMUSG00000026341, ENSMUSG00000018411, ENSMUSG00000079523, ENSMUSG00000026755, ENSMUSG00000057738, ENSMUSG00000028745, ENSMUSG00000005871, ENSMUSG00000021573, ENSMUSG00000000416, ENSMUSG00000020315, ENSMUSG00000015733, ENSMUSG00000029621, ENSMUSG00000058587, ENSMUSG00000070372, ENSMUSG00000027479, ENSMUSG00000008475, ENSMUSG00000029465,…	2.04174	0.11508	0.0011508
GOTERM_BP_5	GO:0042391~regulation of membrane potential	50	6.64711e-05	ENSMUSG00000025968, ENSMUSG00000025203, ENSMUSG00000024639, ENSMUSG00000017412, ENSMUSG00000059003, ENSMUSG00000021665, ENSMUSG00000003378, ENSMUSG00000041362, ENSMUSG00000063142, ENSMUSG00000037625, ENSMUSG00000019146, ENSMUSG00000003235, ENSMUSG00000028161, ENSMUSG00000034656, ENSMUSG00000022770, ENSMUSG00000025889, ENSMUSG00000019969, ENSMUSG00000031302, ENSMUSG00000028020, ENSMUSG00000062078,…	1.68617	0.116167	0.00116167
GOTERM_BP_5	GO:0000059~protein import into nucleus, docking	12	0.000110176	ENSMUSG00000002319, ENSMUSG00000041879, ENSMUSG00000000131, ENSMUSG00000040029, ENSMUSG00000031691, ENSMUSG00000033365, ENSMUSG00000001440, ENSMUSG00000022100, ENSMUSG00000042590, ENSMUSG00000009470, ENSMUSG00000066232, ENSMUSG00000020290	3.21046	0.192478	0.00192478
GOTERM_BP_5	GO:0022618~ribonucleoprotein complex assembly	20	0.000110397	ENSMUSG00000024268, ENSMUSG00000020409, ENSMUSG00000027810, ENSMUSG00000032580, ENSMUSG00000041415, ENSMUSG00000016554, ENSMUSG00000024991, ENSMUSG00000028676, ENSMUSG00000025024, ENSMUSG00000001767, ENSMUSG00000008373, ENSMUSG00000028134, ENSMUSG00000027613, ENSMUSG00000062604, ENSMUSG00000060098, ENSMUSG00000038335, ENSMUSG00000005506, ENSMUSG00000022601, ENSMUSG00000027763, ENSMUSG00000002107	2.36064	0.192864	0.00192864
GOTERM_BP_5	GO:0017038~protein import	37	0.000129254	ENSMUSG00000029198, ENSMUSG00000055334, ENSMUSG00000039016, ENSMUSG00000000131, ENSMUSG00000029430, ENSMUSG00000001440, ENSMUSG00000022100, ENSMUSG00000021478, ENSMUSG00000042590, ENSMUSG00000024580, ENSMUSG00000036986, ENSMUSG00000021929, ENSMUSG00000029020, ENSMUSG00000027099, ENSMUSG00000018362, ENSMUSG00000020315, ENSMUSG00000002496, ENSMUSG00000027782, ENSMUSG00000031922, ENSMUSG00000008450,…	1.81078	0.225772	0.00225772
GOTERM_BP_5	GO:0051028~mRNA transport	30	0.000149317	ENSMUSG00000062078, ENSMUSG00000003226, ENSMUSG00000052798, ENSMUSG00000022100, ENSMUSG00000024287, ENSMUSG00000028676, ENSMUSG00000034826, ENSMUSG00000025134, ENSMUSG00000025580, ENSMUSG00000016619, ENSMUSG00000030188, ENSMUSG00000022774, ENSMUSG00000038374, ENSMUSG00000042271, ENSMUSG00000029405, ENSMUSG00000019432, ENSMUSG00000028330, ENSMUSG00000026491, ENSMUSG00000010097, ENSMUSG00000000838,…	1.94181	0.260774	0.00260774
GOTERM_BP_5	GO:0043242~negative regulation of protein complex disassembly	20	0.000185349	ENSMUSG00000015222, ENSMUSG00000032479, ENSMUSG00000015733, ENSMUSG00000020476, ENSMUSG00000058587, ENSMUSG00000070372, ENSMUSG00000035299, ENSMUSG00000018411, ENSMUSG00000023022, ENSMUSG00000033392, ENSMUSG00000027254, ENSMUSG00000026879, ENSMUSG00000057738, ENSMUSG00000052727, ENSMUSG00000028745, ENSMUSG00000005871, ENSMUSG00000032050, ENSMUSG00000045180, ENSMUSG00000020315, ENSMUSG00000008035	2.29319	0.323605	0.00323605
GOTERM_BP_5	GO:0000902~cell morphogenesis	106	0.000187492	ENSMUSG00000024969, ENSMUSG00000021109, ENSMUSG00000022508, ENSMUSG00000001847, ENSMUSG00000037815, ENSMUSG00000029512, ENSMUSG00000033066, ENSMUSG00000028649, ENSMUSG00000039233, ENSMUSG00000060534, ENSMUSG00000041362, ENSMUSG00000031391, ENSMUSG00000022636, ENSMUSG00000022443, ENSMUSG00000051910, ENSMUSG00000047193, ENSMUSG00000021066, ENSMUSG00000020900, ENSMUSG00000028832, ENSMUSG00000022055,…	1.37666	0.327341	0.00327341
GOTERM_BP_5	GO:0032268~regulation of cellular protein metabolic process	97	0.000242767	ENSMUSG00000024423, ENSMUSG00000025855, ENSMUSG00000026254, ENSMUSG00000032601, ENSMUSG00000020849, ENSMUSG00000018501, ENSMUSG00000037058, ENSMUSG00000028156, ENSMUSG00000005610, ENSMUSG00000032293, ENSMUSG00000052707, ENSMUSG00000028708, ENSMUSG00000037376, ENSMUSG00000022788, ENSMUSG00000016481, ENSMUSG00000052155, ENSMUSG00000039782, ENSMUSG00000021764, ENSMUSG00000025856, ENSMUSG00000028580,…	1.39025	0.423652	0.00423652
GOTERM_BP_5	GO:0048193~Golgi vesicle transport	26	0.00024635	ENSMUSG00000034602, ENSMUSG00000028847, ENSMUSG00000039367, ENSMUSG00000021248, ENSMUSG00000030298, ENSMUSG00000035933, ENSMUSG00000024941, ENSMUSG00000001576, ENSMUSG00000051412, ENSMUSG00000032757, ENSMUSG00000020986, ENSMUSG00000037643, ENSMUSG00000029148, ENSMUSG00000024533, ENSMUSG00000029462, ENSMUSG00000027429, ENSMUSG00000029705, ENSMUSG00000027799, ENSMUSG00000030754, ENSMUSG00000027879,…	2.00654	0.429892	0.00429892
GOTERM_BP_5	GO:0022008~neurogenesis	170	0.000267086	ENSMUSG00000071866, ENSMUSG00000059146, ENSMUSG00000029516, ENSMUSG00000019777, ENSMUSG00000037815, ENSMUSG00000001847, ENSMUSG00000029512, ENSMUSG00000033066, ENSMUSG00000024639, ENSMUSG00000039233, ENSMUSG00000060534, ENSMUSG00000038417, ENSMUSG00000041362, ENSMUSG00000027581, ENSMUSG00000056579, ENSMUSG00000036766, ENSMUSG00000031391, ENSMUSG00000019971, ENSMUSG00000022636, ENSMUSG00000050071,…	1.27044	0.465998	0.00465998
GOTERM_BP_5	GO:0007416~synaptogenesis	12	0.000272952	ENSMUSG00000032076, ENSMUSG00000027253, ENSMUSG00000031985, ENSMUSG00000033768, ENSMUSG00000033577, ENSMUSG00000022892, ENSMUSG00000024304, ENSMUSG00000034656, ENSMUSG00000063887, ENSMUSG00000020886, ENSMUSG00000024109, ENSMUSG00000066392	3.00981	0.47621	0.0047621
GOTERM_BP_5	GO:0008064~regulation of actin polymerization or depolymerization	25	0.000336117	ENSMUSG00000015733, ENSMUSG00000020476, ENSMUSG00000029621, ENSMUSG00000058587, ENSMUSG00000070372, ENSMUSG00000008475, ENSMUSG00000049775, ENSMUSG00000001847, ENSMUSG00000029465, ENSMUSG00000030707, ENSMUSG00000022770, ENSMUSG00000021549, ENSMUSG00000050310, ENSMUSG00000026341, ENSMUSG00000026755, ENSMUSG00000079523, ENSMUSG00000023022, ENSMUSG00000024142, ENSMUSG00000026879, ENSMUSG00000057738,…	2.00654	0.586106	0.00586106
GOTERM_BP_5	GO:0010769~regulation of cell morphogenesis involved in differentiation	25	0.000336117	ENSMUSG00000024563, ENSMUSG00000040785, ENSMUSG00000029634, ENSMUSG00000059146, ENSMUSG00000029516, ENSMUSG00000052516, ENSMUSG00000029512, ENSMUSG00000066129, ENSMUSG00000018411, ENSMUSG00000028664, ENSMUSG00000020458, ENSMUSG00000022607, ENSMUSG00000050587, ENSMUSG00000034656, ENSMUSG00000018965, ENSMUSG00000002489, ENSMUSG00000024515, ENSMUSG00000022055, ENSMUSG00000025810, ENSMUSG00000027950,…	2.00654	0.586106	0.00586106
GOTERM_BP_5	GO:0009142~nucleoside triphosphate biosynthetic process	40	0.000381105	ENSMUSG00000019302, ENSMUSG00000060671, ENSMUSG00000019210, ENSMUSG00000040907, ENSMUSG00000037685, ENSMUSG00000024566, ENSMUSG00000021983, ENSMUSG00000019943, ENSMUSG00000018770, ENSMUSG00000000563, ENSMUSG00000006057, ENSMUSG00000026576, ENSMUSG00000037601, ENSMUSG00000019087, ENSMUSG00000032087, ENSMUSG00000022956, ENSMUSG00000036622, ENSMUSG00000025428, ENSMUSG00000033379, ENSMUSG00000033793,…	1.68972	0.664307	0.00664307
GOTERM_BP_5	GO:0030833~regulation of actin filament polymerization	23	0.000426441	ENSMUSG00000015733, ENSMUSG00000020476, ENSMUSG00000029621, ENSMUSG00000058587, ENSMUSG00000070372, ENSMUSG00000001847, ENSMUSG00000049775, ENSMUSG00000008475, ENSMUSG00000029465, ENSMUSG00000022770, ENSMUSG00000030707, ENSMUSG00000021549, ENSMUSG00000050310, ENSMUSG00000026341, ENSMUSG00000079523, ENSMUSG00000026755, ENSMUSG00000024142, ENSMUSG00000026879, ENSMUSG00000057738, ENSMUSG00000028745,…	2.05113	0.743056	0.00743056
GOTERM_BP_5	GO:0016197~endosome transport	17	0.000468583	ENSMUSG00000021589, ENSMUSG00000030172, ENSMUSG00000031328, ENSMUSG00000020128, ENSMUSG00000034602, ENSMUSG00000037234, ENSMUSG00000025422, ENSMUSG00000034867, ENSMUSG00000031667, ENSMUSG00000026024, ENSMUSG00000028419, ENSMUSG00000051412, ENSMUSG00000029104, ENSMUSG00000031479, ENSMUSG00000028572, ENSMUSG00000024772, ENSMUSG00000044465	2.3525	0.816203	0.00816203
GOTERM_BP_5	GO:0030832~regulation of actin filament length	25	0.000486326	ENSMUSG00000015733, ENSMUSG00000020476, ENSMUSG00000029621, ENSMUSG00000058587, ENSMUSG00000070372, ENSMUSG00000008475, ENSMUSG00000049775, ENSMUSG00000001847, ENSMUSG00000029465, ENSMUSG00000030707, ENSMUSG00000022770, ENSMUSG00000021549, ENSMUSG00000050310, ENSMUSG00000026341, ENSMUSG00000026755, ENSMUSG00000079523, ENSMUSG00000023022, ENSMUSG00000024142, ENSMUSG00000026879, ENSMUSG00000057738,…	1.9672	0.846984	0.00846984
GOTERM_BP_5	GO:0032956~regulation of actin cytoskeleton organization	28	0.000540664	ENSMUSG00000020476, ENSMUSG00000001847, ENSMUSG00000049775, ENSMUSG00000026341, ENSMUSG00000026755, ENSMUSG00000023022, ENSMUSG00000079523, ENSMUSG00000057738, ENSMUSG00000028745, ENSMUSG00000043079, ENSMUSG00000020315, ENSMUSG00000032740, ENSMUSG00000015733, ENSMUSG00000029621, ENSMUSG00000058587, ENSMUSG00000070372, ENSMUSG00000008475, ENSMUSG00000029465, ENSMUSG00000022770, ENSMUSG00000030707,…	1.87277	0.941198	0.00941198
GOTERM_BP_5	GO:0016079~synaptic vesicle exocytosis	12	0.000599142	ENSMUSG00000030805, ENSMUSG00000020894, ENSMUSG00000022568, ENSMUSG00000021071, ENSMUSG00000007207, ENSMUSG00000022973, ENSMUSG00000019969, ENSMUSG00000033615, ENSMUSG00000029608, ENSMUSG00000063887, ENSMUSG00000053025, ENSMUSG00000061601	2.83276	1.0425	0.010425
GOTERM_BP_5	GO:0007167~enzyme linked receptor protein signaling pathway	93	0.000620081	ENSMUSG00000024563, ENSMUSG00000023266, ENSMUSG00000028530, ENSMUSG00000059146, ENSMUSG00000020176, ENSMUSG00000002602, ENSMUSG00000032253, ENSMUSG00000031010, ENSMUSG00000027253, ENSMUSG00000029714, ENSMUSG00000043733, ENSMUSG00000021962, ENSMUSG00000028289, ENSMUSG00000039844, ENSMUSG00000031681, ENSMUSG00000052155, ENSMUSG00000003378, ENSMUSG00000025856, ENSMUSG00000044167, ENSMUSG00000029231,…	1.36709	1.07874	0.0107874
GOTERM_BP_5	GO:0000904~cell morphogenesis involved in differentiation	75	0.000667932	ENSMUSG00000048482, ENSMUSG00000021109, ENSMUSG00000021662, ENSMUSG00000001847, ENSMUSG00000017485, ENSMUSG00000029512, ENSMUSG00000052516, ENSMUSG00000004364, ENSMUSG00000050896, ENSMUSG00000039233, ENSMUSG00000043733, ENSMUSG00000060534, ENSMUSG00000022995, ENSMUSG00000028289, ENSMUSG00000041362, ENSMUSG00000022601, ENSMUSG00000022607, ENSMUSG00000031391, ENSMUSG00000022636, ENSMUSG00000006932,…	1.41972	1.16153	0.0116153
GOTERM_BP_5	GO:0006413~translational initiation	20	0.000731046	ENSMUSG00000035150, ENSMUSG00000016510, ENSMUSG00000030738, ENSMUSG00000026254, ENSMUSG00000003235, ENSMUSG00000006941, ENSMUSG00000070319, ENSMUSG00000067194, ENSMUSG00000023106, ENSMUSG00000024991, ENSMUSG00000016554, ENSMUSG00000029145, ENSMUSG00000028156, ENSMUSG00000074656, ENSMUSG00000020459, ENSMUSG00000037376, ENSMUSG00000011158, ENSMUSG00000021282, ENSMUSG00000056076, ENSMUSG00000030068	2.11215	1.27063	0.0127063
GOTERM_BP_5	GO:0000245~spliceosome assembly	11	0.000764967	ENSMUSG00000020409, ENSMUSG00000001767, ENSMUSG00000024268, ENSMUSG00000025024, ENSMUSG00000028134, ENSMUSG00000062604, ENSMUSG00000032580, ENSMUSG00000028676, ENSMUSG00000005506, ENSMUSG00000002107, ENSMUSG00000027763	2.94293	1.32921	0.0132921
GOTERM_BP_5	GO:0009260~ribonucleotide biosynthetic process	44	0.000849547	ENSMUSG00000019302, ENSMUSG00000060671, ENSMUSG00000019210, ENSMUSG00000040907, ENSMUSG00000037685, ENSMUSG00000024566, ENSMUSG00000021983, ENSMUSG00000019943, ENSMUSG00000018770, ENSMUSG00000033308, ENSMUSG00000027823, ENSMUSG00000000563, ENSMUSG00000006057, ENSMUSG00000015961, ENSMUSG00000026576, ENSMUSG00000037601, ENSMUSG00000027889, ENSMUSG00000019087, ENSMUSG00000032087, ENSMUSG00000022956,…	1.59077	1.47515	0.0147515
GOTERM_BP_5	GO:0030705~cytoskeleton-dependent intracellular transport	18	0.000895754	ENSMUSG00000034593, ENSMUSG00000037032, ENSMUSG00000022892, ENSMUSG00000006930, ENSMUSG00000022443, ENSMUSG00000024862, ENSMUSG00000025733, ENSMUSG00000075284, ENSMUSG00000020900, ENSMUSG00000006740, ENSMUSG00000029207, ENSMUSG00000029757, ENSMUSG00000029104, ENSMUSG00000029223, ENSMUSG00000063077, ENSMUSG00000021288, ENSMUSG00000018736, ENSMUSG00000026131	2.18895	1.55479	0.0155479
GOTERM_BP_5	GO:0010975~regulation of neuron projection development	23	0.000903939	ENSMUSG00000050587, ENSMUSG00000029634, ENSMUSG00000029516, ENSMUSG00000034656, ENSMUSG00000059146, ENSMUSG00000029512, ENSMUSG00000052516, ENSMUSG00000018965, ENSMUSG00000066129, ENSMUSG00000018411, ENSMUSG00000002489, ENSMUSG00000022055, ENSMUSG00000025810, ENSMUSG00000028664, ENSMUSG00000027950, ENSMUSG00000029674, ENSMUSG00000019969, ENSMUSG00000020458, ENSMUSG00000026959, ENSMUSG00000055254,…	1.96385	1.5689	0.015689
GOTERM_BP_5	GO:0007015~actin filament organization	26	0.000989031	ENSMUSG00000016382, ENSMUSG00000038976, ENSMUSG00000031328, ENSMUSG00000034480, ENSMUSG00000037902, ENSMUSG00000020476, ENSMUSG00000026830, ENSMUSG00000024456, ENSMUSG00000052397, ENSMUSG00000072115, ENSMUSG00000038729, ENSMUSG00000022770, ENSMUSG00000030707, ENSMUSG00000015605, ENSMUSG00000033066, ENSMUSG00000023022, ENSMUSG00000025006, ENSMUSG00000022995, ENSMUSG00000026879, ENSMUSG00000032827,…	1.86322	1.71538	0.0171538
GOTERM_BP_5	GO:0045333~cellular respiration	27	0.00100123	ENSMUSG00000025968, ENSMUSG00000027010, ENSMUSG00000063882, ENSMUSG00000022477, ENSMUSG00000021577, ENSMUSG00000025204, ENSMUSG00000032279, ENSMUSG00000064345, ENSMUSG00000004789, ENSMUSG00000005683, ENSMUSG00000059534, ENSMUSG00000025651, ENSMUSG00000030541, ENSMUSG00000023089, ENSMUSG00000026526, ENSMUSG00000029167, ENSMUSG00000020321, ENSMUSG00000061838, ENSMUSG00000024668, ENSMUSG00000022110,…	1.83649	1.73636	0.0173636
GOTERM_BP_5	GO:0048699~generation of neurons	155	0.00103383	ENSMUSG00000071866, ENSMUSG00000029516, ENSMUSG00000059146, ENSMUSG00000019777, ENSMUSG00000037815, ENSMUSG00000001847, ENSMUSG00000029512, ENSMUSG00000033066, ENSMUSG00000024639, ENSMUSG00000039233, ENSMUSG00000060534, ENSMUSG00000038417, ENSMUSG00000041362, ENSMUSG00000027581, ENSMUSG00000056579, ENSMUSG00000031391, ENSMUSG00000019971, ENSMUSG00000022636, ENSMUSG00000050071, ENSMUSG00000034586,…	1.25156	1.79242	0.0179242
GOTERM_BP_5	GO:0009144~purine nucleoside triphosphate metabolic process	42	0.0011475	ENSMUSG00000025968, ENSMUSG00000019302, ENSMUSG00000060671, ENSMUSG00000019210, ENSMUSG00000040907, ENSMUSG00000037685, ENSMUSG00000024566, ENSMUSG00000021983, ENSMUSG00000019943, ENSMUSG00000018770, ENSMUSG00000000563, ENSMUSG00000006057, ENSMUSG00000026576, ENSMUSG00000037601, ENSMUSG00000019087, ENSMUSG00000032087, ENSMUSG00000022956, ENSMUSG00000036622, ENSMUSG00000025428, ENSMUSG00000033379,…	1.59009	1.98765	0.0198765
GOTERM_BP_5	GO:0009150~purine ribonucleotide metabolic process	46	0.00117783	ENSMUSG00000025968, ENSMUSG00000019302, ENSMUSG00000060671, ENSMUSG00000019210, ENSMUSG00000040907, ENSMUSG00000037685, ENSMUSG00000024566, ENSMUSG00000021983, ENSMUSG00000019943, ENSMUSG00000018770, ENSMUSG00000027823, ENSMUSG00000000563, ENSMUSG00000002326, ENSMUSG00000006057, ENSMUSG00000015961, ENSMUSG00000026576, ENSMUSG00000037601, ENSMUSG00000027889, ENSMUSG00000019087, ENSMUSG00000032087,…	1.55127	2.03966	0.0203966
GOTERM_BP_5	GO:0010970~microtubule-based transport	12	0.00119442	ENSMUSG00000006740, ENSMUSG00000006930, ENSMUSG00000022892, ENSMUSG00000024862, ENSMUSG00000029757, ENSMUSG00000029104, ENSMUSG00000063077, ENSMUSG00000029223, ENSMUSG00000018736, ENSMUSG00000025733, ENSMUSG00000021288, ENSMUSG00000026131	2.67539	2.06812	0.0206812
GOTERM_BP_5	GO:0007632~visual behavior	17	0.0012313	ENSMUSG00000022489, ENSMUSG00000020716, ENSMUSG00000079487, ENSMUSG00000037032, ENSMUSG00000022892, ENSMUSG00000040907, ENSMUSG00000021478, ENSMUSG00000027852, ENSMUSG00000021670, ENSMUSG00000027950, ENSMUSG00000059003, ENSMUSG00000026959, ENSMUSG00000031302, ENSMUSG00000029104, ENSMUSG00000025485, ENSMUSG00000051331, ENSMUSG00000005089	2.20072	2.13133	0.0213133
GOTERM_BP_5	GO:0019228~regulation of action potential in neuron	22	0.00123335	ENSMUSG00000031985, ENSMUSG00000062078, ENSMUSG00000020716, ENSMUSG00000034593, ENSMUSG00000031425, ENSMUSG00000025232, ENSMUSG00000003235, ENSMUSG00000025203, ENSMUSG00000002881, ENSMUSG00000026812, ENSMUSG00000021478, ENSMUSG00000019843, ENSMUSG00000041607, ENSMUSG00000029145, ENSMUSG00000064329, ENSMUSG00000056073, ENSMUSG00000021665, ENSMUSG00000022982, ENSMUSG00000032854, ENSMUSG00000063142,…	1.96195	2.13483	0.0213483
GOTERM_BP_5	GO:0006376~mRNA splice site selection	7	0.00131111	ENSMUSG00000020409, ENSMUSG00000024268, ENSMUSG00000028134, ENSMUSG00000028676, ENSMUSG00000005506, ENSMUSG00000002107, ENSMUSG00000027763	4.01308	2.26799	0.0226799
GOTERM_BP_5	GO:0015985~energy coupled proton transport, down electrochemical gradient	19	0.00150356	ENSMUSG00000019302, ENSMUSG00000022295, ENSMUSG00000052459, ENSMUSG00000019210, ENSMUSG00000025781, ENSMUSG00000018770, ENSMUSG00000034566, ENSMUSG00000006057, ENSMUSG00000000563, ENSMUSG00000019087, ENSMUSG00000022956, ENSMUSG00000025428, ENSMUSG00000006273, ENSMUSG00000033793, ENSMUSG00000033379, ENSMUSG00000024121, ENSMUSG00000025393, ENSMUSG00000038600, ENSMUSG00000021114	2.06077	2.59678	0.0259678
GOTERM_BP_5	GO:0015986~ATP synthesis coupled proton transport	19	0.00150356	ENSMUSG00000019302, ENSMUSG00000022295, ENSMUSG00000052459, ENSMUSG00000019210, ENSMUSG00000025781, ENSMUSG00000018770, ENSMUSG00000034566, ENSMUSG00000006057, ENSMUSG00000000563, ENSMUSG00000019087, ENSMUSG00000022956, ENSMUSG00000025428, ENSMUSG00000006273, ENSMUSG00000033793, ENSMUSG00000033379, ENSMUSG00000024121, ENSMUSG00000025393, ENSMUSG00000038600, ENSMUSG00000021114	2.06077	2.59678	0.0259678
GOTERM_BP_5	GO:0031111~negative regulation of microtubule polymerization or depolymerization	11	0.00158499	ENSMUSG00000018411, ENSMUSG00000015222, ENSMUSG00000033392, ENSMUSG00000032479, ENSMUSG00000027254, ENSMUSG00000052727, ENSMUSG00000005871, ENSMUSG00000027479, ENSMUSG00000035299, ENSMUSG00000008035, ENSMUSG00000028832	2.75899	2.73559	0.0273559
GOTERM_BP_5	GO:0008542~visual learning	16	0.00169489	ENSMUSG00000022489, ENSMUSG00000020716, ENSMUSG00000079487, ENSMUSG00000037032, ENSMUSG00000022892, ENSMUSG00000040907, ENSMUSG00000021478, ENSMUSG00000027852, ENSMUSG00000021670, ENSMUSG00000027950, ENSMUSG00000059003, ENSMUSG00000026959, ENSMUSG00000031302, ENSMUSG00000029104, ENSMUSG00000025485, ENSMUSG00000051331	2.21411	2.92263	0.0292263
GOTERM_BP_5	GO:0042176~regulation of protein catabolic process	17	0.00189826	ENSMUSG00000024425, ENSMUSG00000031328, ENSMUSG00000054387, ENSMUSG00000019433, ENSMUSG00000039615, ENSMUSG00000031555, ENSMUSG00000006998, ENSMUSG00000001729, ENSMUSG00000027598, ENSMUSG00000026229, ENSMUSG00000058709, ENSMUSG00000032216, ENSMUSG00000059003, ENSMUSG00000005871, ENSMUSG00000042303, ENSMUSG00000020290, ENSMUSG00000017221	2.13195	3.26784	0.0326784
GOTERM_BP_5	GO:0055082~cellular chemical homeostasis	89	0.00195012	ENSMUSG00000033208, ENSMUSG00000025968, ENSMUSG00000025203, ENSMUSG00000021109, ENSMUSG00000032293, ENSMUSG00000024639, ENSMUSG00000017412, ENSMUSG00000059003, ENSMUSG00000021665, ENSMUSG00000037996, ENSMUSG00000041362, ENSMUSG00000021313, ENSMUSG00000052889, ENSMUSG00000029064, ENSMUSG00000003378, ENSMUSG00000051331, ENSMUSG00000019970, ENSMUSG00000063142, ENSMUSG00000037625, ENSMUSG00000079037,…	1.3327	3.35569	0.0335569
GOTERM_BP_5	GO:0050801~ion homeostasis	96	0.00205476	ENSMUSG00000033208, ENSMUSG00000025968, ENSMUSG00000025203, ENSMUSG00000021109, ENSMUSG00000022122, ENSMUSG00000032293, ENSMUSG00000024639, ENSMUSG00000017412, ENSMUSG00000059003, ENSMUSG00000021665, ENSMUSG00000037996, ENSMUSG00000041362, ENSMUSG00000021313, ENSMUSG00000029064, ENSMUSG00000052889, ENSMUSG00000003378, ENSMUSG00000051331, ENSMUSG00000019970, ENSMUSG00000063142, ENSMUSG00000037625,…	1.31487	3.53272	0.0353272
GOTERM_BP_5	GO:0001662~behavioral fear response	10	0.002084	ENSMUSG00000056755, ENSMUSG00000045573, ENSMUSG00000056073, ENSMUSG00000055078, ENSMUSG00000023192, ENSMUSG00000021478, ENSMUSG00000026024, ENSMUSG00000020402, ENSMUSG00000008892, ENSMUSG00000030209	2.86649	3.58213	0.0358213
GOTERM_BP_5	GO:0006351~transcription, DNA-dependent	46	0.00210867	ENSMUSG00000024382, ENSMUSG00000002658, ENSMUSG00000022476, ENSMUSG00000038369, ENSMUSG00000043962, ENSMUSG00000019302, ENSMUSG00000043866, ENSMUSG00000031783, ENSMUSG00000036980, ENSMUSG00000031487, ENSMUSG00000028266, ENSMUSG00000005198, ENSMUSG00000031585, ENSMUSG00000033813, ENSMUSG00000015882, ENSMUSG00000025019, ENSMUSG00000022682, ENSMUSG00000027433, ENSMUSG00000031314, ENSMUSG00000020962,…	1.51313	3.62381	0.0362381
GOTERM_BP_5	GO:0045454~cell redox homeostasis	27	0.00238555	ENSMUSG00000022763, ENSMUSG00000024583, ENSMUSG00000018196, ENSMUSG00000028367, ENSMUSG00000024614, ENSMUSG00000025823, ENSMUSG00000028843, ENSMUSG00000031584, ENSMUSG00000058709, ENSMUSG00000028567, ENSMUSG00000020571, ENSMUSG00000036932, ENSMUSG00000031068, ENSMUSG00000050043, ENSMUSG00000034723, ENSMUSG00000021497, ENSMUSG00000040697, ENSMUSG00000075700, ENSMUSG00000027006, ENSMUSG00000025130,…	1.74763	4.09032	0.0409032
GOTERM_BP_5	GO:0010639~negative regulation of organelle organization	27	0.00238555	ENSMUSG00000015222, ENSMUSG00000020476, ENSMUSG00000049775, ENSMUSG00000018411, ENSMUSG00000023022, ENSMUSG00000079523, ENSMUSG00000033392, ENSMUSG00000027254, ENSMUSG00000057738, ENSMUSG00000052727, ENSMUSG00000028745, ENSMUSG00000005871, ENSMUSG00000020315, ENSMUSG00000032479, ENSMUSG00000015733, ENSMUSG00000058587, ENSMUSG00000070372, ENSMUSG00000027479, ENSMUSG00000035299, ENSMUSG00000045092,…	1.74763	4.09032	0.0409032
GOTERM_BP_5	GO:0010468~regulation of gene expression	661	0.00238961	ENSMUSG00000002658, ENSMUSG00000038518, ENSMUSG00000026254, ENSMUSG00000048756, ENSMUSG00000021109, ENSMUSG00000025616, ENSMUSG00000056476, ENSMUSG00000024260, ENSMUSG00000019777, ENSMUSG00000018501, ENSMUSG00000038418, ENSMUSG00000006058, ENSMUSG00000052707, ENSMUSG00000021514, ENSMUSG00000061911, ENSMUSG00000040033, ENSMUSG00000028708, ENSMUSG00000059474, ENSMUSG00000028901, ENSMUSG00000029684,…	1.09207	4.09715	0.0409715
GOTERM_BP_5	GO:0051650~establishment of vesicle localization	9	0.00270066	ENSMUSG00000032202, ENSMUSG00000022568, ENSMUSG00000034593, ENSMUSG00000019969, ENSMUSG00000021248, ENSMUSG00000045180, ENSMUSG00000063887, ENSMUSG00000024948, ENSMUSG00000061601	3.00981	4.61868	0.0461868
GOTERM_BP_5	GO:0006164~purine nucleotide biosynthetic process	50	0.00287931	ENSMUSG00000041624, ENSMUSG00000060671, ENSMUSG00000019302, ENSMUSG00000019210, ENSMUSG00000040907, ENSMUSG00000033910, ENSMUSG00000037685, ENSMUSG00000024566, ENSMUSG00000021983, ENSMUSG00000019943, ENSMUSG00000018770, ENSMUSG00000020431, ENSMUSG00000027823, ENSMUSG00000006057, ENSMUSG00000000563, ENSMUSG00000026576, ENSMUSG00000037601, ENSMUSG00000015961, ENSMUSG00000027889, ENSMUSG00000032087,…	1.46463	4.917	0.04917
GOTERM_BP_5	GO:0070507~regulation of microtubule cytoskeleton organization	18	0.00301611	ENSMUSG00000015222, ENSMUSG00000032479, ENSMUSG00000015733, ENSMUSG00000027479, ENSMUSG00000035299, ENSMUSG00000028832, ENSMUSG00000018411, ENSMUSG00000033392, ENSMUSG00000027254, ENSMUSG00000073542, ENSMUSG00000052727, ENSMUSG00000005871, ENSMUSG00000020580, ENSMUSG00000000416, ENSMUSG00000008035, ENSMUSG00000026131, ENSMUSG00000020290, ENSMUSG00000057113	2.00654	5.14485	0.0514485
GOTERM_BP_5	GO:0007264~small GTPase mediated signal transduction	85	0.00316962	ENSMUSG00000028057, ENSMUSG00000023353, ENSMUSG00000031442, ENSMUSG00000027347, ENSMUSG00000028249, ENSMUSG00000020476, ENSMUSG00000022508, ENSMUSG00000003037, ENSMUSG00000079477, ENSMUSG00000001847, ENSMUSG00000017144, ENSMUSG00000029512, ENSMUSG00000047187, ENSMUSG00000030643, ENSMUSG00000032549, ENSMUSG00000041112, ENSMUSG00000017418, ENSMUSG00000039844, ENSMUSG00000020121, ENSMUSG00000079316,…	1.32214	5.39991	0.0539991
GOTERM_BP_5	GO:0006984~ER-nuclear signaling pathway	14	0.00322731	ENSMUSG00000029467, ENSMUSG00000027810, ENSMUSG00000031668, ENSMUSG00000021831, ENSMUSG00000054455, ENSMUSG00000015839, ENSMUSG00000046062, ENSMUSG00000031960, ENSMUSG00000040435, ENSMUSG00000022365, ENSMUSG00000020715, ENSMUSG00000078622, ENSMUSG00000026864, ENSMUSG00000022812	2.24733	5.49559	0.0549559
GOTERM_BP_5	GO:0034220~ion transmembrane transport	20	0.0032321	ENSMUSG00000019302, ENSMUSG00000022295, ENSMUSG00000052459, ENSMUSG00000019210, ENSMUSG00000025781, ENSMUSG00000018770, ENSMUSG00000034566, ENSMUSG00000006057, ENSMUSG00000000563, ENSMUSG00000019087, ENSMUSG00000022956, ENSMUSG00000025428, ENSMUSG00000006273, ENSMUSG00000033793, ENSMUSG00000033379, ENSMUSG00000024121, ENSMUSG00000025393, ENSMUSG00000038600, ENSMUSG00000023030, ENSMUSG00000021114	1.91099	5.50354	0.0550354
GOTERM_BP_5	GO:0016458~gene silencing	25	0.00323782	ENSMUSG00000004099, ENSMUSG00000001424, ENSMUSG00000025571, ENSMUSG00000031167, ENSMUSG00000027018, ENSMUSG00000031715, ENSMUSG00000052707, ENSMUSG00000067150, ENSMUSG00000040054, ENSMUSG00000000743, ENSMUSG00000032187, ENSMUSG00000020661, ENSMUSG00000036698, ENSMUSG00000041415, ENSMUSG00000022774, ENSMUSG00000051910, ENSMUSG00000028330, ENSMUSG00000020390, ENSMUSG00000027951, ENSMUSG00000015149,…	1.76012	5.51301	0.0551301
GOTERM_BP_5	GO:0030866~cortical actin cytoskeleton organization	8	0.00341585	ENSMUSG00000004530, ENSMUSG00000028465, ENSMUSG00000019978, ENSMUSG00000027624, ENSMUSG00000024044, ENSMUSG00000028906, ENSMUSG00000003814, ENSMUSG00000022770	3.21046	5.80767	0.0580767
GOTERM_BP_5	GO:0008286~insulin receptor signaling pathway	15	0.00361279	ENSMUSG00000037112, ENSMUSG00000055980, ENSMUSG00000057177, ENSMUSG00000041417, ENSMUSG00000038485, ENSMUSG00000032253, ENSMUSG00000005534, ENSMUSG00000028698, ENSMUSG00000001729, ENSMUSG00000025006, ENSMUSG00000031834, ENSMUSG00000024539, ENSMUSG00000027288, ENSMUSG00000031955, ENSMUSG00000044167	2.14986	6.13263	0.0613263
GOTERM_BP_5	GO:0006084~acetyl-CoA metabolic process	16	0.00391513	ENSMUSG00000026526, ENSMUSG00000022477, ENSMUSG00000020321, ENSMUSG00000021577, ENSMUSG00000061838, ENSMUSG00000032279, ENSMUSG00000020917, ENSMUSG00000022110, ENSMUSG00000004789, ENSMUSG00000019179, ENSMUSG00000005683, ENSMUSG00000052738, ENSMUSG00000010277, ENSMUSG00000000168, ENSMUSG00000030541, ENSMUSG00000027406	2.07127	6.62942	0.0662942
GOTERM_BP_5	GO:0032774~RNA biosynthetic process	46	0.00429996	ENSMUSG00000024382, ENSMUSG00000002658, ENSMUSG00000022476, ENSMUSG00000038369, ENSMUSG00000043962, ENSMUSG00000019302, ENSMUSG00000043866, ENSMUSG00000031783, ENSMUSG00000036980, ENSMUSG00000031487, ENSMUSG00000028266, ENSMUSG00000005198, ENSMUSG00000031585, ENSMUSG00000033813, ENSMUSG00000015882, ENSMUSG00000025019, ENSMUSG00000022682, ENSMUSG00000027433, ENSMUSG00000031314, ENSMUSG00000020962,…	1.46509	7.25819	0.0725819
GOTERM_BP_5	GO:0007243~protein kinase cascade	78	0.00431388	ENSMUSG00000024969, ENSMUSG00000025658, ENSMUSG00000050711, ENSMUSG00000028530, ENSMUSG00000019828, ENSMUSG00000021559, ENSMUSG00000037239, ENSMUSG00000040687, ENSMUSG00000043733, ENSMUSG00000028708, ENSMUSG00000004865, ENSMUSG00000062604, ENSMUSG00000022788, ENSMUSG00000031681, ENSMUSG00000025551, ENSMUSG00000025199, ENSMUSG00000002496, ENSMUSG00000055980, ENSMUSG00000002948, ENSMUSG00000038668,…	1.32636	7.28086	0.0728086
GOTERM_BP_5	GO:0032869~cellular response to insulin stimulus	20	0.00445786	ENSMUSG00000055980, ENSMUSG00000037112, ENSMUSG00000057177, ENSMUSG00000019699, ENSMUSG00000041417, ENSMUSG00000032253, ENSMUSG00000038485, ENSMUSG00000005534, ENSMUSG00000028698, ENSMUSG00000001729, ENSMUSG00000025006, ENSMUSG00000031834, ENSMUSG00000024539, ENSMUSG00000027288, ENSMUSG00000004056, ENSMUSG00000044167, ENSMUSG00000031955, ENSMUSG00000030671, ENSMUSG00000019970, ENSMUSG00000037643	1.86655	7.51503	0.0751503
GOTERM_BP_5	GO:0014047~glutamate secretion	6	0.00455068	ENSMUSG00000024897, ENSMUSG00000033577, ENSMUSG00000048482, ENSMUSG00000055254, ENSMUSG00000023192, ENSMUSG00000019433	4.01308	7.66568	0.0766568
GOTERM_BP_5	GO:0009109~coenzyme catabolic process	15	0.00540283	ENSMUSG00000026526, ENSMUSG00000022477, ENSMUSG00000020321, ENSMUSG00000021577, ENSMUSG00000061838, ENSMUSG00000032279, ENSMUSG00000022110, ENSMUSG00000004789, ENSMUSG00000019179, ENSMUSG00000005683, ENSMUSG00000052738, ENSMUSG00000010277, ENSMUSG00000030541, ENSMUSG00000030088, ENSMUSG00000027406	2.07573	9.03811	0.0903811
GOTERM_BP_5	GO:0007420~brain development	92	0.00567473	ENSMUSG00000029478, ENSMUSG00000019874, ENSMUSG00000069171, ENSMUSG00000020849, ENSMUSG00000026739, ENSMUSG00000019777, ENSMUSG00000021557, ENSMUSG00000001847, ENSMUSG00000018501, ENSMUSG00000017485, ENSMUSG00000052516, ENSMUSG00000029512, ENSMUSG00000024639, ENSMUSG00000040481, ENSMUSG00000020536, ENSMUSG00000031681, ENSMUSG00000000416, ENSMUSG00000048799, ENSMUSG00000019971, ENSMUSG00000032187,…	1.28196	9.47195	0.0947195
GOTERM_BP_5	GO:0001701~in utero embryonic development	86	0.00590397	ENSMUSG00000009569, ENSMUSG00000029478, ENSMUSG00000024563, ENSMUSG00000053754, ENSMUSG00000046985, ENSMUSG00000052429, ENSMUSG00000002102, ENSMUSG00000021109, ENSMUSG00000015697, ENSMUSG00000020936, ENSMUSG00000026739, ENSMUSG00000029131, ENSMUSG00000004364, ENSMUSG00000021660, ENSMUSG00000021669, ENSMUSG00000029020, ENSMUSG00000022682, ENSMUSG00000029547, ENSMUSG00000016481, ENSMUSG00000008976,…	1.2926	9.83621	0.0983621
GOTERM_CC_5	GO:0005737~cytoplasm	2208	2.05459e-89	ENSMUSG00000046785, ENSMUSG00000039361, ENSMUSG00000024360, ENSMUSG00000026254, ENSMUSG00000053799, ENSMUSG00000025894, ENSMUSG00000039367, ENSMUSG00000032504, ENSMUSG00000037815, ENSMUSG00000018501, ENSMUSG00000032503, ENSMUSG00000006058, ENSMUSG00000061518, ENSMUSG00000006057, ENSMUSG00000073563, ENSMUSG00000052707, ENSMUSG00000019975, ENSMUSG00000019978, ENSMUSG00000042032, ENSMUSG00000025487,…		3.001e-86	3.001e-88
GOTERM_CC_5	GO:0043229~intracellular organelle	2617	2.83375e-80	ENSMUSG00000002658, ENSMUSG00000038518, ENSMUSG00000046785, ENSMUSG00000039361, ENSMUSG00000039367, ENSMUSG00000032504, ENSMUSG00000037815, ENSMUSG00000018501, ENSMUSG00000006058, ENSMUSG00000061518, ENSMUSG00000006057, ENSMUSG00000042446, ENSMUSG00000019975, ENSMUSG00000019978, ENSMUSG00000042032, ENSMUSG00000001016, ENSMUSG00000003279, ENSMUSG00000019970, ENSMUSG00000019971, ENSMUSG00000026260,…		4.14e-77	4.14e-79
GOTERM_CC_5	GO:0043231~intracellular membrane-bounded organelle	2324	2.04733e-62	ENSMUSG00000002658, ENSMUSG00000038518, ENSMUSG00000046785, ENSMUSG00000039361, ENSMUSG00000039367, ENSMUSG00000032504, ENSMUSG00000018501, ENSMUSG00000006058, ENSMUSG00000061518, ENSMUSG00000006057, ENSMUSG00000042446, ENSMUSG00000019975, ENSMUSG00000042032, ENSMUSG00000001016, ENSMUSG00000019970, ENSMUSG00000019971, ENSMUSG00000026260, ENSMUSG00000036698, ENSMUSG00000037805, ENSMUSG00000024359,…		2.99e-59	2.99e-61
GOTERM_CC_5	GO:0044446~intracellular organelle part	1140	2.06429e-43	ENSMUSG00000025204, ENSMUSG00000056476, ENSMUSG00000039367, ENSMUSG00000019777, ENSMUSG00000032504, ENSMUSG00000018501, ENSMUSG00000018707, ENSMUSG00000019370, ENSMUSG00000039176, ENSMUSG00000033066, ENSMUSG00000006058, ENSMUSG00000006057, ENSMUSG00000061518, ENSMUSG00000001016, ENSMUSG00000033475, ENSMUSG00000003279, ENSMUSG00000025208, ENSMUSG00000022262, ENSMUSG00000030541, ENSMUSG00000019971,…	1.36971	3.0155e-40	3.0155e-42
GOTERM_CC_5	GO:0044444~cytoplasmic part	1407	1.73132e-39	ENSMUSG00000033061, ENSMUSG00000046785, ENSMUSG00000039361, ENSMUSG00000025203, ENSMUSG00000025204, ENSMUSG00000053799, ENSMUSG00000039367, ENSMUSG00000032504, ENSMUSG00000033065, ENSMUSG00000039176, ENSMUSG00000006058, ENSMUSG00000006057, ENSMUSG00000061518, ENSMUSG00000052707, ENSMUSG00000060636, ENSMUSG00000046947, ENSMUSG00000019975, ENSMUSG00000025487, ENSMUSG00000033475, ENSMUSG00000042032,…	1.29051	2.52911e-36	2.52911e-38
GOTERM_CC_5	GO:0005634~nucleus	1402	1.5532e-30	ENSMUSG00000002658, ENSMUSG00000038518, ENSMUSG00000032777, ENSMUSG00000019775, ENSMUSG00000048756, ENSMUSG00000056476, ENSMUSG00000025616, ENSMUSG00000019777, ENSMUSG00000018501, ENSMUSG00000006058, ENSMUSG00000042446, ENSMUSG00000040033, ENSMUSG00000029684, ENSMUSG00000053581, ENSMUSG00000001016, ENSMUSG00000019970, ENSMUSG00000019971, ENSMUSG00000036698, ENSMUSG00000020116, ENSMUSG00000020114,…	1.24689	2.26891e-27	2.26891e-29
GOTERM_CC_5	GO:0044428~nuclear part	477	7.02813e-24	ENSMUSG00000021109, ENSMUSG00000056476, ENSMUSG00000019777, ENSMUSG00000018501, ENSMUSG00000034826, ENSMUSG00000006058, ENSMUSG00000020263, ENSMUSG00000042308, ENSMUSG00000001016, ENSMUSG00000006392, ENSMUSG00000048661, ENSMUSG00000025782, ENSMUSG00000020116, ENSMUSG00000035293, ENSMUSG00000036693, ENSMUSG00000040044, ENSMUSG00000019373, ENSMUSG00000021500, ENSMUSG00000079562, ENSMUSG00000006456,…	1.47505	1.02667e-20	1.02667e-22
GOTERM_CC_5	GO:0030529~ribonucleoprotein complex	215	7.48117e-22	ENSMUSG00000032399, ENSMUSG00000018199, ENSMUSG00000032777, ENSMUSG00000025794, ENSMUSG00000001120, ENSMUSG00000025103, ENSMUSG00000052707, ENSMUSG00000060636, ENSMUSG00000081094, ENSMUSG00000000948, ENSMUSG00000025208, ENSMUSG00000048758, ENSMUSG00000042699, ENSMUSG00000025508, ENSMUSG00000020409, ENSMUSG00000029169, ENSMUSG00000003660, ENSMUSG00000036698, ENSMUSG00000002524, ENSMUSG00000037805,…	1.7859	1.09285e-18	1.09285e-20
GOTERM_CC_5	GO:0070013~intracellular organelle lumen	432	7.52055e-21	ENSMUSG00000021109, ENSMUSG00000056476, ENSMUSG00000019777, ENSMUSG00000029781, ENSMUSG00000039176, ENSMUSG00000006058, ENSMUSG00000020263, ENSMUSG00000042308, ENSMUSG00000001016, ENSMUSG00000025208, ENSMUSG00000006392, ENSMUSG00000026260, ENSMUSG00000025782, ENSMUSG00000020116, ENSMUSG00000035293, ENSMUSG00000033624, ENSMUSG00000036693, ENSMUSG00000021500, ENSMUSG00000079562, ENSMUSG00000006456,…	1.46323	1.0986e-17	1.0986e-19
GOTERM_CC_5	GO:0031981~nuclear lumen	338	2.16401e-16	ENSMUSG00000000134, ENSMUSG00000031783, ENSMUSG00000021109, ENSMUSG00000056476, ENSMUSG00000019777, ENSMUSG00000026739, ENSMUSG00000006058, ENSMUSG00000020263, ENSMUSG00000035575, ENSMUSG00000042308, ENSMUSG00000001016, ENSMUSG00000006392, ENSMUSG00000042699, ENSMUSG00000020409, ENSMUSG00000025782, ENSMUSG00000020116, ENSMUSG00000035293, ENSMUSG00000022774, ENSMUSG00000009575, ENSMUSG00000036693,…	1.46898	3.21965e-13	3.21965e-15
GOTERM_CC_5	GO:0043232~intracellular non-membrane-bounded organelle	649	3.52598e-16	ENSMUSG00000025795, ENSMUSG00000025794, ENSMUSG00000032504, ENSMUSG00000028906, ENSMUSG00000019777, ENSMUSG00000035954, ENSMUSG00000018707, ENSMUSG00000037815, ENSMUSG00000019370, ENSMUSG00000033066, ENSMUSG00000029580, ENSMUSG00000060636, ENSMUSG00000039943, ENSMUSG00000038416, ENSMUSG00000019978, ENSMUSG00000029684, ENSMUSG00000001016, ENSMUSG00000003279, ENSMUSG00000022262, ENSMUSG00000025208,…	1.29786	4.88498e-13	4.88498e-15
GOTERM_CC_5	GO:0005829~cytosol	226	5.64134e-15	ENSMUSG00000071866, ENSMUSG00000032504, ENSMUSG00000033065, ENSMUSG00000001127, ENSMUSG00000002797, ENSMUSG00000029580, ENSMUSG00000081094, ENSMUSG00000027254, ENSMUSG00000022789, ENSMUSG00000025487, ENSMUSG00000036932, ENSMUSG00000025485, ENSMUSG00000035437, ENSMUSG00000019971, ENSMUSG00000001525, ENSMUSG00000029993, ENSMUSG00000001134, ENSMUSG00000027244, ENSMUSG00000025889, ENSMUSG00000020250,…	1.57978	8.27116e-12	8.27116e-14
GOTERM_CC_5	GO:0005794~Golgi apparatus	267	2.2416e-14	ENSMUSG00000033061, ENSMUSG00000039361, ENSMUSG00000004319, ENSMUSG00000039367, ENSMUSG00000028700, ENSMUSG00000027255, ENSMUSG00000027455, ENSMUSG00000022500, ENSMUSG00000034040, ENSMUSG00000017929, ENSMUSG00000006651, ENSMUSG00000000001, ENSMUSG00000039959, ENSMUSG00000062234, ENSMUSG00000027879, ENSMUSG00000051853, ENSMUSG00000019969, ENSMUSG00000039953, ENSMUSG00000008153, ENSMUSG00000024758,…	1.5024	3.27627e-11	3.27627e-13
GOTERM_CC_5	GO:0030425~dendrite	67	5.25736e-14	ENSMUSG00000038084, ENSMUSG00000001986, ENSMUSG00000031012, ENSMUSG00000019828, ENSMUSG00000031214, ENSMUSG00000039943, ENSMUSG00000066306, ENSMUSG00000059003, ENSMUSG00000003378, ENSMUSG00000036766, ENSMUSG00000051331, ENSMUSG00000019861, ENSMUSG00000028402, ENSMUSG00000026782, ENSMUSG00000028833, ENSMUSG00000019433, ENSMUSG00000034656, ENSMUSG00000022204, ENSMUSG00000027184, ENSMUSG00000069895,…	2.33745	7.68718e-11	7.68718e-13
GOTERM_CC_5	GO:0030054~cell junction	194	4.14266e-13	ENSMUSG00000033060, ENSMUSG00000024261, ENSMUSG00000025892, ENSMUSG00000037815, ENSMUSG00000054728, ENSMUSG00000028909, ENSMUSG00000067578, ENSMUSG00000009394, ENSMUSG00000003378, ENSMUSG00000032773, ENSMUSG00000003279, ENSMUSG00000042303, ENSMUSG00000022770, ENSMUSG00000021279, ENSMUSG00000007653, ENSMUSG00000062234, ENSMUSG00000039953, ENSMUSG00000067242, ENSMUSG00000022255, ENSMUSG00000021112,…	1.58403	6.05094e-10	6.05094e-12
GOTERM_CC_5	GO:0019898~extrinsic to membrane	191	5.36746e-12	ENSMUSG00000024969, ENSMUSG00000028249, ENSMUSG00000038388, ENSMUSG00000041670, ENSMUSG00000025793, ENSMUSG00000043940, ENSMUSG00000041268, ENSMUSG00000020375, ENSMUSG00000028906, ENSMUSG00000026123, ENSMUSG00000020886, ENSMUSG00000056629, ENSMUSG00000001847, ENSMUSG00000035954, ENSMUSG00000062995, ENSMUSG00000024639, ENSMUSG00000029713, ENSMUSG00000042388, ENSMUSG00000020263, ENSMUSG00000022789,…	1.55293	7.84079e-09	7.84079e-11
GOTERM_CC_5	GO:0005681~spliceosome	69	8.14775e-12	ENSMUSG00000040383, ENSMUSG00000032580, ENSMUSG00000021413, ENSMUSG00000060373, ENSMUSG00000028809, ENSMUSG00000028882, ENSMUSG00000022023, ENSMUSG00000027193, ENSMUSG00000027014, ENSMUSG00000023932, ENSMUSG00000034931, ENSMUSG00000059208, ENSMUSG00000059005, ENSMUSG00000016018, ENSMUSG00000002455, ENSMUSG00000033732, ENSMUSG00000005687, ENSMUSG00000021039, ENSMUSG00000028945, ENSMUSG00000020409,…	2.13544	1.19021e-08	1.19021e-10
GOTERM_CC_5	GO:0030424~axon	62	1.05155e-11	ENSMUSG00000030310, ENSMUSG00000023169, ENSMUSG00000052516, ENSMUSG00000031214, ENSMUSG00000066151, ENSMUSG00000032086, ENSMUSG00000060534, ENSMUSG00000041362, ENSMUSG00000033676, ENSMUSG00000063142, ENSMUSG00000031391, ENSMUSG00000022636, ENSMUSG00000027500, ENSMUSG00000026830, ENSMUSG00000022204, ENSMUSG00000032532, ENSMUSG00000026787, ENSMUSG00000070880, ENSMUSG00000020900, ENSMUSG00000032076,…	2.22365	1.5361e-08	1.5361e-10
GOTERM_CC_5	GO:0014069~postsynaptic density	36	2.23222e-10	ENSMUSG00000035168, ENSMUSG00000001986, ENSMUSG00000022623, ENSMUSG00000007617, ENSMUSG00000041444, ENSMUSG00000019828, ENSMUSG00000020886, ENSMUSG00000024083, ENSMUSG00000042429, ENSMUSG00000042388, ENSMUSG00000039943, ENSMUSG00000059003, ENSMUSG00000043079, ENSMUSG00000003279, ENSMUSG00000063887, ENSMUSG00000015766, ENSMUSG00000019861, ENSMUSG00000068206, ENSMUSG00000028402, ENSMUSG00000052572,…	2.70889	3.26082e-07	3.26082e-09
GOTERM_CC_5	GO:0005856~cytoskeleton	381	8.22512e-10	ENSMUSG00000058070, ENSMUSG00000025795, ENSMUSG00000032504, ENSMUSG00000028906, ENSMUSG00000018707, ENSMUSG00000037815, ENSMUSG00000023764, ENSMUSG00000019370, ENSMUSG00000033066, ENSMUSG00000030397, ENSMUSG00000029580, ENSMUSG00000032258, ENSMUSG00000039943, ENSMUSG00000027254, ENSMUSG00000038416, ENSMUSG00000036438, ENSMUSG00000022788, ENSMUSG00000019978, ENSMUSG00000029684, ENSMUSG00000022262,…	1.30314	1.20152e-06	1.20152e-08
GOTERM_CC_5	GO:0031410~cytoplasmic vesicle	194	1.21596e-09	ENSMUSG00000028249, ENSMUSG00000039361, ENSMUSG00000004319, ENSMUSG00000029430, ENSMUSG00000029616, ENSMUSG00000041268, ENSMUSG00000024261, ENSMUSG00000039367, ENSMUSG00000015656, ENSMUSG00000032504, ENSMUSG00000049775, ENSMUSG00000001847, ENSMUSG00000025823, ENSMUSG00000029512, ENSMUSG00000047187, ENSMUSG00000062995, ENSMUSG00000026944, ENSMUSG00000039637, ENSMUSG00000056429, ENSMUSG00000028645,…	1.46554	1.77627e-06	1.77627e-08
GOTERM_CC_5	GO:0005654~nucleoplasm	221	2.70596e-09	ENSMUSG00000000134, ENSMUSG00000031783, ENSMUSG00000021109, ENSMUSG00000056476, ENSMUSG00000026739, ENSMUSG00000019777, ENSMUSG00000006058, ENSMUSG00000020263, ENSMUSG00000042308, ENSMUSG00000006392, ENSMUSG00000020409, ENSMUSG00000025782, ENSMUSG00000022774, ENSMUSG00000009575, ENSMUSG00000021500, ENSMUSG00000006456, ENSMUSG00000047242, ENSMUSG00000036940, ENSMUSG00000020705, ENSMUSG00000007850,…	1.41587	3.95285e-06	3.95285e-08
GOTERM_CC_5	GO:0016604~nuclear body	70	6.08805e-09	ENSMUSG00000029478, ENSMUSG00000028248, ENSMUSG00000030216, ENSMUSG00000031311, ENSMUSG00000028809, ENSMUSG00000028882, ENSMUSG00000022023, ENSMUSG00000038384, ENSMUSG00000008730, ENSMUSG00000026739, ENSMUSG00000028676, ENSMUSG00000029474, ENSMUSG00000041777, ENSMUSG00000000787, ENSMUSG00000023932, ENSMUSG00000027829, ENSMUSG00000002307, ENSMUSG00000057113, ENSMUSG00000020409, ENSMUSG00000040850,…	1.89177	8.8934e-06	8.8934e-08
GOTERM_CC_5	GO:0031967~organelle envelope	201	6.77969e-09	ENSMUSG00000037916, ENSMUSG00000000131, ENSMUSG00000043940, ENSMUSG00000025204, ENSMUSG00000042590, ENSMUSG00000064345, ENSMUSG00000034826, ENSMUSG00000039176, ENSMUSG00000061518, ENSMUSG00000006057, ENSMUSG00000022956, ENSMUSG00000033475, ENSMUSG00000036932, ENSMUSG00000030541, ENSMUSG00000073422, ENSMUSG00000021139, ENSMUSG00000031791, ENSMUSG00000024259, ENSMUSG00000048661, ENSMUSG00000020402,…	1.42844	9.90374e-06	9.90374e-08
GOTERM_CC_5	GO:0015630~microtubule cytoskeleton	172	1.06642e-08	ENSMUSG00000058070, ENSMUSG00000025795, ENSMUSG00000032504, ENSMUSG00000018707, ENSMUSG00000023764, ENSMUSG00000026944, ENSMUSG00000019370, ENSMUSG00000028649, ENSMUSG00000029020, ENSMUSG00000032258, ENSMUSG00000030397, ENSMUSG00000066306, ENSMUSG00000027254, ENSMUSG00000038416, ENSMUSG00000058672, ENSMUSG00000036438, ENSMUSG00000041775, ENSMUSG00000028849, ENSMUSG00000025920, ENSMUSG00000022262,…	1.46682	1.55782e-05	1.55782e-07
GOTERM_CC_5	GO:0016023~cytoplasmic membrane-bounded vesicle	160	1.52358e-08	ENSMUSG00000028249, ENSMUSG00000039361, ENSMUSG00000029430, ENSMUSG00000029616, ENSMUSG00000041268, ENSMUSG00000024261, ENSMUSG00000039367, ENSMUSG00000015656, ENSMUSG00000032504, ENSMUSG00000049775, ENSMUSG00000025823, ENSMUSG00000001847, ENSMUSG00000029512, ENSMUSG00000026944, ENSMUSG00000062995, ENSMUSG00000047187, ENSMUSG00000039637, ENSMUSG00000056429, ENSMUSG00000022841, ENSMUSG00000028645,…	1.48313	2.22564e-05	2.22564e-07
GOTERM_CC_5	GO:0048770~pigment granule	46	1.10648e-07	ENSMUSG00000034593, ENSMUSG00000019302, ENSMUSG00000001424, ENSMUSG00000028249, ENSMUSG00000029430, ENSMUSG00000029616, ENSMUSG00000007891, ENSMUSG00000029767, ENSMUSG00000020849, ENSMUSG00000021248, ENSMUSG00000015656, ENSMUSG00000032504, ENSMUSG00000079477, ENSMUSG00000025823, ENSMUSG00000018326, ENSMUSG00000001847, ENSMUSG00000047187, ENSMUSG00000037720, ENSMUSG00000026864, ENSMUSG00000071650,…	2.07682	0.000161633	1.61633e-06
GOTERM_CC_5	GO:0044451~nucleoplasm part	187	1.34871e-07	ENSMUSG00000024563, ENSMUSG00000000134, ENSMUSG00000028248, ENSMUSG00000031311, ENSMUSG00000031783, ENSMUSG00000021109, ENSMUSG00000056476, ENSMUSG00000038384, ENSMUSG00000019777, ENSMUSG00000026739, ENSMUSG00000031585, ENSMUSG00000006058, ENSMUSG00000041777, ENSMUSG00000029238, ENSMUSG00000020263, ENSMUSG00000023027, ENSMUSG00000000346, ENSMUSG00000031314, ENSMUSG00000042308, ENSMUSG00000040760,…	1.39889	0.000197018	1.97018e-06
GOTERM_CC_5	GO:0019717~synaptosome	38	2.17422e-07	ENSMUSG00000053825, ENSMUSG00000026276, ENSMUSG00000021071, ENSMUSG00000037386, ENSMUSG00000052301, ENSMUSG00000047879, ENSMUSG00000070570, ENSMUSG00000031012, ENSMUSG00000056296, ENSMUSG00000020886, ENSMUSG00000020516, ENSMUSG00000059003, ENSMUSG00000019906, ENSMUSG00000027273, ENSMUSG00000015766, ENSMUSG00000030337, ENSMUSG00000032589, ENSMUSG00000034891, ENSMUSG00000068206, ENSMUSG00000001833,…	2.20953	0.000317609	3.17609e-06
GOTERM_CC_5	GO:0030135~coated vesicle	59	4.98807e-07	ENSMUSG00000039361, ENSMUSG00000040276, ENSMUSG00000070570, ENSMUSG00000017978, ENSMUSG00000041268, ENSMUSG00000040722, ENSMUSG00000024261, ENSMUSG00000039367, ENSMUSG00000062995, ENSMUSG00000056429, ENSMUSG00000009394, ENSMUSG00000021314, ENSMUSG00000030317, ENSMUSG00000004961, ENSMUSG00000020986, ENSMUSG00000019861, ENSMUSG00000030058, ENSMUSG00000006169, ENSMUSG00000031144, ENSMUSG00000019433,…	1.82595	0.000728653	7.28653e-06
GOTERM_CC_5	GO:0044431~Golgi apparatus part	94	5.74069e-07	ENSMUSG00000074513, ENSMUSG00000024425, ENSMUSG00000040276, ENSMUSG00000040236, ENSMUSG00000003033, ENSMUSG00000039037, ENSMUSG00000056812, ENSMUSG00000040722, ENSMUSG00000039367, ENSMUSG00000028847, ENSMUSG00000028700, ENSMUSG00000041720, ENSMUSG00000062995, ENSMUSG00000045210, ENSMUSG00000027198, ENSMUSG00000039637, ENSMUSG00000022885, ENSMUSG00000005899, ENSMUSG00000056429, ENSMUSG00000027455,…	1.58914	0.000838594	8.38594e-06
GOTERM_CC_5	GO:0005768~endosome	102	6.58256e-07	ENSMUSG00000036769, ENSMUSG00000004319, ENSMUSG00000025793, ENSMUSG00000020375, ENSMUSG00000006058, ENSMUSG00000038417, ENSMUSG00000020263, ENSMUSG00000033379, ENSMUSG00000034109, ENSMUSG00000028788, ENSMUSG00000040760, ENSMUSG00000000743, ENSMUSG00000024772, ENSMUSG00000030534, ENSMUSG00000007458, ENSMUSG00000030638, ENSMUSG00000079557, ENSMUSG00000070953, ENSMUSG00000023030, ENSMUSG00000017639,…	1.55331	0.000961574	9.61574e-06
GOTERM_CC_5	GO:0044429~mitochondrial part	186	1.15047e-06	ENSMUSG00000019428, ENSMUSG00000037916, ENSMUSG00000028247, ENSMUSG00000025968, ENSMUSG00000022450, ENSMUSG00000025204, ENSMUSG00000018042, ENSMUSG00000030451, ENSMUSG00000064345, ENSMUSG00000039176, ENSMUSG00000027199, ENSMUSG00000006057, ENSMUSG00000061518, ENSMUSG00000029020, ENSMUSG00000018574, ENSMUSG00000022956, ENSMUSG00000020477, ENSMUSG00000033475, ENSMUSG00000025208, ENSMUSG00000036932,…	1.3622	0.00168059	1.68059e-05
GOTERM_CC_5	GO:0009898~internal side of plasma membrane	112	1.50587e-06	ENSMUSG00000019428, ENSMUSG00000031442, ENSMUSG00000043940, ENSMUSG00000025793, ENSMUSG00000018042, ENSMUSG00000001847, ENSMUSG00000020886, ENSMUSG00000037815, ENSMUSG00000034826, ENSMUSG00000030643, ENSMUSG00000027255, ENSMUSG00000022500, ENSMUSG00000022841, ENSMUSG00000021314, ENSMUSG00000020671, ENSMUSG00000024772, ENSMUSG00000051984, ENSMUSG00000021139, ENSMUSG00000030534, ENSMUSG00000021062,…	1.4976	0.00219975	2.19975e-05
GOTERM_CC_5	GO:0005624~membrane fraction	181	1.64148e-06	ENSMUSG00000021071, ENSMUSG00000001986, ENSMUSG00000048756, ENSMUSG00000032776, ENSMUSG00000028700, ENSMUSG00000019828, ENSMUSG00000020886, ENSMUSG00000001847, ENSMUSG00000001467, ENSMUSG00000029512, ENSMUSG00000007440, ENSMUSG00000050511, ENSMUSG00000022594, ENSMUSG00000034101, ENSMUSG00000039637, ENSMUSG00000045613, ENSMUSG00000024639, ENSMUSG00000023021, ENSMUSG00000039943, ENSMUSG00000003378,…	1.36197	0.00239784	2.39784e-05
GOTERM_CC_5	GO:0005730~nucleolus	119	1.81572e-06	ENSMUSG00000071415, ENSMUSG00000020076, ENSMUSG00000026127, ENSMUSG00000031711, ENSMUSG00000035575, ENSMUSG00000025920, ENSMUSG00000001016, ENSMUSG00000032834, ENSMUSG00000021595, ENSMUSG00000061458, ENSMUSG00000018433, ENSMUSG00000041360, ENSMUSG00000042699, ENSMUSG00000004393, ENSMUSG00000060739, ENSMUSG00000020116, ENSMUSG00000035293, ENSMUSG00000022300, ENSMUSG00000027185, ENSMUSG00000046204,…	1.47314	0.00265236	2.65236e-05
GOTERM_CC_5	GO:0000502~proteasome complex	33	2.28615e-06	ENSMUSG00000026914, ENSMUSG00000018189, ENSMUSG00000002102, ENSMUSG00000015671, ENSMUSG00000020720, ENSMUSG00000017428, ENSMUSG00000050812, ENSMUSG00000026229, ENSMUSG00000060073, ENSMUSG00000026750, ENSMUSG00000018286, ENSMUSG00000025487, ENSMUSG00000029649, ENSMUSG00000027272, ENSMUSG00000005779, ENSMUSG00000032301, ENSMUSG00000025326, ENSMUSG00000017221, ENSMUSG00000021024, ENSMUSG00000040850,…	2.18346	0.00333955	3.33955e-05
GOTERM_CC_5	GO:0005874~microtubule	96	2.65117e-06	ENSMUSG00000058070, ENSMUSG00000027012, ENSMUSG00000063146, ENSMUSG00000025795, ENSMUSG00000024862, ENSMUSG00000037234, ENSMUSG00000018707, ENSMUSG00000074657, ENSMUSG00000066306, ENSMUSG00000038416, ENSMUSG00000027254, ENSMUSG00000058672, ENSMUSG00000025920, ENSMUSG00000029757, ENSMUSG00000022262, ENSMUSG00000031922, ENSMUSG00000020483, ENSMUSG00000001525, ENSMUSG00000020687, ENSMUSG00000032479,…	1.53504	0.00387275	3.87275e-05
GOTERM_CC_5	GO:0005635~nuclear envelope	67	3.07411e-06	ENSMUSG00000003226, ENSMUSG00000055334, ENSMUSG00000000131, ENSMUSG00000043940, ENSMUSG00000042590, ENSMUSG00000020074, ENSMUSG00000030298, ENSMUSG00000034826, ENSMUSG00000021929, ENSMUSG00000027613, ENSMUSG00000031791, ENSMUSG00000025647, ENSMUSG00000020181, ENSMUSG00000048661, ENSMUSG00000060771, ENSMUSG00000028063, ENSMUSG00000009470, ENSMUSG00000029501, ENSMUSG00000015090, ENSMUSG00000041879,…	1.68052	0.00449055	4.49055e-05
GOTERM_CC_5	GO:0048471~perinuclear region of cytoplasm	79	3.26975e-06	ENSMUSG00000036769, ENSMUSG00000024261, ENSMUSG00000020074, ENSMUSG00000075376, ENSMUSG00000074657, ENSMUSG00000029131, ENSMUSG00000022781, ENSMUSG00000052707, ENSMUSG00000029713, ENSMUSG00000024528, ENSMUSG00000029757, ENSMUSG00000063142, ENSMUSG00000004961, ENSMUSG00000020986, ENSMUSG00000030805, ENSMUSG00000021139, ENSMUSG00000039713, ENSMUSG00000006021, ENSMUSG00000023277, ENSMUSG00000025979,…	1.60408	0.00477633	4.77633e-05
GOTERM_CC_5	GO:0005643~nuclear pore	33	3.75254e-06	ENSMUSG00000003226, ENSMUSG00000055334, ENSMUSG00000000131, ENSMUSG00000052798, ENSMUSG00000001440, ENSMUSG00000022100, ENSMUSG00000042590, ENSMUSG00000034826, ENSMUSG00000030298, ENSMUSG00000021929, ENSMUSG00000018362, ENSMUSG00000027782, ENSMUSG00000016619, ENSMUSG00000009470, ENSMUSG00000003731, ENSMUSG00000026491, ENSMUSG00000022905, ENSMUSG00000041879, ENSMUSG00000010097, ENSMUSG00000002319,…	2.14645	0.00548155	5.48155e-05
GOTERM_CC_5	GO:0044430~cytoskeletal part	257	4.66921e-06	ENSMUSG00000058070, ENSMUSG00000025795, ENSMUSG00000032504, ENSMUSG00000018707, ENSMUSG00000023764, ENSMUSG00000019370, ENSMUSG00000033066, ENSMUSG00000032258, ENSMUSG00000030397, ENSMUSG00000039943, ENSMUSG00000027254, ENSMUSG00000038416, ENSMUSG00000036438, ENSMUSG00000003279, ENSMUSG00000022262, ENSMUSG00000035437, ENSMUSG00000019971, ENSMUSG00000001525, ENSMUSG00000031516, ENSMUSG00000001134,…	1.27424	0.00682054	6.82054e-05
GOTERM_CC_5	GO:0005739~mitochondrion	412	9.51682e-06	ENSMUSG00000037916, ENSMUSG00000025204, ENSMUSG00000018196, ENSMUSG00000039176, ENSMUSG00000006057, ENSMUSG00000061518, ENSMUSG00000060636, ENSMUSG00000046947, ENSMUSG00000022956, ENSMUSG00000067847, ENSMUSG00000038412, ENSMUSG00000042032, ENSMUSG00000033475, ENSMUSG00000025208, ENSMUSG00000021519, ENSMUSG00000030541, ENSMUSG00000073422, ENSMUSG00000024259, ENSMUSG00000053291, ENSMUSG00000026260,…	1.19598	0.0139012	0.000139012
GOTERM_CC_5	GO:0046930~pore complex	37	1.66394e-05	ENSMUSG00000003226, ENSMUSG00000005674, ENSMUSG00000055334, ENSMUSG00000000131, ENSMUSG00000052798, ENSMUSG00000001440, ENSMUSG00000022100, ENSMUSG00000042590, ENSMUSG00000034826, ENSMUSG00000030298, ENSMUSG00000021929, ENSMUSG00000018362, ENSMUSG00000027782, ENSMUSG00000008892, ENSMUSG00000016619, ENSMUSG00000021771, ENSMUSG00000020402, ENSMUSG00000009470, ENSMUSG00000003731, ENSMUSG00000026491,…	1.94508	0.024304	0.00024304
GOTERM_CC_5	GO:0016363~nuclear matrix	25	1.901e-05	ENSMUSG00000020661, ENSMUSG00000042133, ENSMUSG00000028063, ENSMUSG00000027525, ENSMUSG00000001157, ENSMUSG00000028809, ENSMUSG00000024287, ENSMUSG00000037236, ENSMUSG00000002625, ENSMUSG00000006678, ENSMUSG00000036986, ENSMUSG00000026491, ENSMUSG00000030782, ENSMUSG00000021938, ENSMUSG00000029290, ENSMUSG00000079562, ENSMUSG00000066306, ENSMUSG00000028820, ENSMUSG00000024498, ENSMUSG00000032249,…	2.28428	0.0277662	0.000277662
GOTERM_CC_5	GO:0030117~membrane coat	31	2.5805e-05	ENSMUSG00000002957, ENSMUSG00000039361, ENSMUSG00000020198, ENSMUSG00000003033, ENSMUSG00000021686, ENSMUSG00000039367, ENSMUSG00000060279, ENSMUSG00000021824, ENSMUSG00000024941, ENSMUSG00000022841, ENSMUSG00000022973, ENSMUSG00000026825, ENSMUSG00000009090, ENSMUSG00000026553, ENSMUSG00000001036, ENSMUSG00000020986, ENSMUSG00000035152, ENSMUSG00000030058, ENSMUSG00000031539, ENSMUSG00000027429,…	2.05113	0.0376892	0.000376892
GOTERM_CC_5	GO:0005938~cell cortex	55	2.92593e-05	ENSMUSG00000024425, ENSMUSG00000059248, ENSMUSG00000024969, ENSMUSG00000020476, ENSMUSG00000031402, ENSMUSG00000031543, ENSMUSG00000053799, ENSMUSG00000028906, ENSMUSG00000021365, ENSMUSG00000067889, ENSMUSG00000028649, ENSMUSG00000029580, ENSMUSG00000021357, ENSMUSG00000019820, ENSMUSG00000028745, ENSMUSG00000031068, ENSMUSG00000025656, ENSMUSG00000022443, ENSMUSG00000015733, ENSMUSG00000020486,…	1.67514	0.0427334	0.000427334
GOTERM_CC_5	GO:0031966~mitochondrial membrane	131	4.24515e-05	ENSMUSG00000037916, ENSMUSG00000025968, ENSMUSG00000022450, ENSMUSG00000025204, ENSMUSG00000018042, ENSMUSG00000030451, ENSMUSG00000064345, ENSMUSG00000027199, ENSMUSG00000039176, ENSMUSG00000006057, ENSMUSG00000061518, ENSMUSG00000029020, ENSMUSG00000018574, ENSMUSG00000022956, ENSMUSG00000033475, ENSMUSG00000036932, ENSMUSG00000059534, ENSMUSG00000030541, ENSMUSG00000032047, ENSMUSG00000021139,…	1.3661	0.061995	0.00061995
GOTERM_CC_5	GO:0031968~organelle outer membrane	41	4.62713e-05	ENSMUSG00000005674, ENSMUSG00000038084, ENSMUSG00000004455, ENSMUSG00000020333, ENSMUSG00000018796, ENSMUSG00000018322, ENSMUSG00000018042, ENSMUSG00000025733, ENSMUSG00000038861, ENSMUSG00000008540, ENSMUSG00000078566, ENSMUSG00000029020, ENSMUSG00000027099, ENSMUSG00000033475, ENSMUSG00000024981, ENSMUSG00000036932, ENSMUSG00000008892, ENSMUSG00000026150, ENSMUSG00000031924, ENSMUSG00000031278,…	1.80852	0.0675716	0.000675716
GOTERM_CC_5	GO:0005840~ribosome	76	4.85275e-05	ENSMUSG00000036860, ENSMUSG00000032399, ENSMUSG00000000740, ENSMUSG00000025794, ENSMUSG00000071415, ENSMUSG00000060679, ENSMUSG00000059291, ENSMUSG00000060636, ENSMUSG00000081094, ENSMUSG00000030786, ENSMUSG00000021967, ENSMUSG00000034729, ENSMUSG00000020477, ENSMUSG00000025208, ENSMUSG00000029066, ENSMUSG00000048758, ENSMUSG00000022601, ENSMUSG00000025290, ENSMUSG00000057113, ENSMUSG00000025508,…	1.51905	0.0708654	0.000708654
GOTERM_CC_5	GO:0034399~nuclear periphery	27	4.99744e-05	ENSMUSG00000001964, ENSMUSG00000024287, ENSMUSG00000028809, ENSMUSG00000037236, ENSMUSG00000036986, ENSMUSG00000030782, ENSMUSG00000066306, ENSMUSG00000028820, ENSMUSG00000027613, ENSMUSG00000000743, ENSMUSG00000020661, ENSMUSG00000042133, ENSMUSG00000027525, ENSMUSG00000028063, ENSMUSG00000001157, ENSMUSG00000002625, ENSMUSG00000006678, ENSMUSG00000026491, ENSMUSG00000021938, ENSMUSG00000029290,…	2.11459	0.0729776	0.000729776
GOTERM_CC_5	GO:0015629~actin cytoskeleton	80	5.36159e-05	ENSMUSG00000029095, ENSMUSG00000029516, ENSMUSG00000028906, ENSMUSG00000037815, ENSMUSG00000031214, ENSMUSG00000033066, ENSMUSG00000067889, ENSMUSG00000066151, ENSMUSG00000028649, ENSMUSG00000034868, ENSMUSG00000023022, ENSMUSG00000043733, ENSMUSG00000022995, ENSMUSG00000019820, ENSMUSG00000038453, ENSMUSG00000028745, ENSMUSG00000019978, ENSMUSG00000034675, ENSMUSG00000029684, ENSMUSG00000000416,…	1.4976	0.0782933	0.000782933
GOTERM_CC_5	GO:0043197~dendritic spine	18	5.86389e-05	ENSMUSG00000038976, ENSMUSG00000001986, ENSMUSG00000041444, ENSMUSG00000019433, ENSMUSG00000033981, ENSMUSG00000036306, ENSMUSG00000031214, ENSMUSG00000058589, ENSMUSG00000020900, ENSMUSG00000059003, ENSMUSG00000053310, ENSMUSG00000026959, ENSMUSG00000032827, ENSMUSG00000043079, ENSMUSG00000026024, ENSMUSG00000003974, ENSMUSG00000029361, ENSMUSG00000005089	2.5584	0.0856253	0.000856253
GOTERM_CC_5	GO:0000151~ubiquitin ligase complex	31	5.94237e-05	ENSMUSG00000052139, ENSMUSG00000028960, ENSMUSG00000026739, ENSMUSG00000039615, ENSMUSG00000023977, ENSMUSG00000030451, ENSMUSG00000004364, ENSMUSG00000024019, ENSMUSG00000022663, ENSMUSG00000032216, ENSMUSG00000029686, ENSMUSG00000027272, ENSMUSG00000033004, ENSMUSG00000031446, ENSMUSG00000024231, ENSMUSG00000029060, ENSMUSG00000020114, ENSMUSG00000059890, ENSMUSG00000022771, ENSMUSG00000022400,…	1.98276	0.0867708	0.000867708
GOTERM_CC_5	GO:0044445~cytosolic part	32	6.66073e-05	ENSMUSG00000024309, ENSMUSG00000052033, ENSMUSG00000030007, ENSMUSG00000061787, ENSMUSG00000004267, ENSMUSG00000033065, ENSMUSG00000001289, ENSMUSG00000028698, ENSMUSG00000034024, ENSMUSG00000081094, ENSMUSG00000024346, ENSMUSG00000030660, ENSMUSG00000022601, ENSMUSG00000025290, ENSMUSG00000021870, ENSMUSG00000007739, ENSMUSG00000031197, ENSMUSG00000029447, ENSMUSG00000027472, ENSMUSG00000027665,…	1.94926	0.0972556	0.000972556
GOTERM_CC_5	GO:0005740~mitochondrial envelope	136	0.000102602	ENSMUSG00000019428, ENSMUSG00000037916, ENSMUSG00000025968, ENSMUSG00000022450, ENSMUSG00000025204, ENSMUSG00000018042, ENSMUSG00000030451, ENSMUSG00000064345, ENSMUSG00000027199, ENSMUSG00000039176, ENSMUSG00000006057, ENSMUSG00000061518, ENSMUSG00000029020, ENSMUSG00000018574, ENSMUSG00000022956, ENSMUSG00000033475, ENSMUSG00000036932, ENSMUSG00000059534, ENSMUSG00000073422, ENSMUSG00000030541,…	1.33482	0.149775	0.00149775
GOTERM_CC_5	GO:0005783~endoplasmic reticulum	265	0.000161741	ENSMUSG00000033061, ENSMUSG00000046785, ENSMUSG00000025203, ENSMUSG00000064138, ENSMUSG00000029781, ENSMUSG00000020260, ENSMUSG00000039943, ENSMUSG00000019975, ENSMUSG00000019970, ENSMUSG00000051984, ENSMUSG00000031791, ENSMUSG00000027642, ENSMUSG00000032262, ENSMUSG00000022770, ENSMUSG00000021501, ENSMUSG00000026740, ENSMUSG00000003363, ENSMUSG00000027879, ENSMUSG00000019969, ENSMUSG00000039953,…	1.21356	0.236011	0.00236011
GOTERM_CC_5	GO:0005741~mitochondrial outer membrane	37	0.00018638	ENSMUSG00000005674, ENSMUSG00000038084, ENSMUSG00000004455, ENSMUSG00000020333, ENSMUSG00000018796, ENSMUSG00000018322, ENSMUSG00000018042, ENSMUSG00000025733, ENSMUSG00000038861, ENSMUSG00000008540, ENSMUSG00000078566, ENSMUSG00000029020, ENSMUSG00000027099, ENSMUSG00000033475, ENSMUSG00000024981, ENSMUSG00000036932, ENSMUSG00000008892, ENSMUSG00000026150, ENSMUSG00000031924, ENSMUSG00000031278,…	1.77489	0.271918	0.00271918
GOTERM_CC_5	GO:0000139~Golgi membrane	56	0.000206327	ENSMUSG00000024425, ENSMUSG00000074513, ENSMUSG00000039037, ENSMUSG00000056812, ENSMUSG00000040722, ENSMUSG00000028847, ENSMUSG00000028700, ENSMUSG00000041720, ENSMUSG00000062995, ENSMUSG00000039637, ENSMUSG00000027198, ENSMUSG00000022885, ENSMUSG00000022747, ENSMUSG00000031749, ENSMUSG00000040584, ENSMUSG00000020986, ENSMUSG00000030059, ENSMUSG00000030058, ENSMUSG00000030701, ENSMUSG00000022159,…	1.56865	0.300979	0.00300979
GOTERM_CC_5	GO:0016585~chromatin remodeling complex	26	0.000240821	ENSMUSG00000029478, ENSMUSG00000018474, ENSMUSG00000019777, ENSMUSG00000062627, ENSMUSG00000031715, ENSMUSG00000024921, ENSMUSG00000057236, ENSMUSG00000020263, ENSMUSG00000031060, ENSMUSG00000021963, ENSMUSG00000040054, ENSMUSG00000038331, ENSMUSG00000032481, ENSMUSG00000040760, ENSMUSG00000034245, ENSMUSG00000031353, ENSMUSG00000032187, ENSMUSG00000002748, ENSMUSG00000062270, ENSMUSG00000007880,…	1.99555	0.351215	0.00351215
GOTERM_CC_5	GO:0030662~coated vesicle membrane	27	0.000269156	ENSMUSG00000037217, ENSMUSG00000070570, ENSMUSG00000039367, ENSMUSG00000056296, ENSMUSG00000062995, ENSMUSG00000035392, ENSMUSG00000024941, ENSMUSG00000009394, ENSMUSG00000021687, ENSMUSG00000026553, ENSMUSG00000020986, ENSMUSG00000001036, ENSMUSG00000030058, ENSMUSG00000031144, ENSMUSG00000033981, ENSMUSG00000039959, ENSMUSG00000027429, ENSMUSG00000026787, ENSMUSG00000073131, ENSMUSG00000020894,…	1.955	0.392462	0.00392462
GOTERM_CC_5	GO:0019866~organelle inner membrane	110	0.000277039	ENSMUSG00000037916, ENSMUSG00000022450, ENSMUSG00000025968, ENSMUSG00000025204, ENSMUSG00000018042, ENSMUSG00000030451, ENSMUSG00000064345, ENSMUSG00000027199, ENSMUSG00000039176, ENSMUSG00000061518, ENSMUSG00000006057, ENSMUSG00000022956, ENSMUSG00000018574, ENSMUSG00000059534, ENSMUSG00000030541, ENSMUSG00000032047, ENSMUSG00000024259, ENSMUSG00000048661, ENSMUSG00000028063, ENSMUSG00000062580,…	1.353	0.403935	0.00403935
GOTERM_CC_5	GO:0044448~cell cortex part	34	0.000306609	ENSMUSG00000026276, ENSMUSG00000038366, ENSMUSG00000059248, ENSMUSG00000024969, ENSMUSG00000031402, ENSMUSG00000053799, ENSMUSG00000031543, ENSMUSG00000029761, ENSMUSG00000028906, ENSMUSG00000067889, ENSMUSG00000050379, ENSMUSG00000029580, ENSMUSG00000021357, ENSMUSG00000019820, ENSMUSG00000057738, ENSMUSG00000028745, ENSMUSG00000020315, ENSMUSG00000001833, ENSMUSG00000038976, ENSMUSG00000022443,…	1.78737	0.44696	0.0044696
GOTERM_CC_5	GO:0012506~vesicle membrane	42	0.000362847	ENSMUSG00000037217, ENSMUSG00000004319, ENSMUSG00000070570, ENSMUSG00000025949, ENSMUSG00000039367, ENSMUSG00000021248, ENSMUSG00000056296, ENSMUSG00000041720, ENSMUSG00000029512, ENSMUSG00000016534, ENSMUSG00000062995, ENSMUSG00000035392, ENSMUSG00000024941, ENSMUSG00000009394, ENSMUSG00000000416, ENSMUSG00000021687, ENSMUSG00000026553, ENSMUSG00000001036, ENSMUSG00000020986, ENSMUSG00000033577,…	1.66164	0.528739	0.00528739
GOTERM_CC_5	GO:0016272~prefoldin complex	9	0.000561684	ENSMUSG00000021870, ENSMUSG00000024309, ENSMUSG00000052033, ENSMUSG00000024346, ENSMUSG00000027472, ENSMUSG00000031197, ENSMUSG00000001134, ENSMUSG00000030421, ENSMUSG00000001289	3.45384	0.817377	0.00817377
GOTERM_CC_5	GO:0005759~mitochondrial matrix	62	0.000872109	ENSMUSG00000036860, ENSMUSG00000028247, ENSMUSG00000027618, ENSMUSG00000028292, ENSMUSG00000039176, ENSMUSG00000005683, ENSMUSG00000032480, ENSMUSG00000021967, ENSMUSG00000034729, ENSMUSG00000020477, ENSMUSG00000025208, ENSMUSG00000029066, ENSMUSG00000049225, ENSMUSG00000004610, ENSMUSG00000035517, ENSMUSG00000006494, ENSMUSG00000026926, ENSMUSG00000026260, ENSMUSG00000026709, ENSMUSG00000002767,…	1.4597	1.26644	0.0126644
GOTERM_CC_5	GO:0031980~mitochondrial lumen	62	0.000872109	ENSMUSG00000036860, ENSMUSG00000028247, ENSMUSG00000027618, ENSMUSG00000028292, ENSMUSG00000039176, ENSMUSG00000005683, ENSMUSG00000032480, ENSMUSG00000021967, ENSMUSG00000034729, ENSMUSG00000020477, ENSMUSG00000025208, ENSMUSG00000029066, ENSMUSG00000049225, ENSMUSG00000004610, ENSMUSG00000035517, ENSMUSG00000006494, ENSMUSG00000026926, ENSMUSG00000026260, ENSMUSG00000026709, ENSMUSG00000002767,…	1.4597	1.26644	0.0126644
GOTERM_CC_5	GO:0005815~microtubule organizing center	70	0.000919466	ENSMUSG00000040860, ENSMUSG00000027550, ENSMUSG00000032504, ENSMUSG00000026885, ENSMUSG00000023764, ENSMUSG00000026944, ENSMUSG00000050812, ENSMUSG00000030397, ENSMUSG00000032258, ENSMUSG00000038416, ENSMUSG00000000743, ENSMUSG00000035437, ENSMUSG00000031922, ENSMUSG00000048799, ENSMUSG00000032118, ENSMUSG00000021597, ENSMUSG00000057113, ENSMUSG00000019971, ENSMUSG00000063439, ENSMUSG00000031347,…	1.42133	1.33478	0.0133478
GOTERM_CC_5	GO:0044433~cytoplasmic vesicle part	40	0.000987447	ENSMUSG00000037217, ENSMUSG00000070570, ENSMUSG00000039367, ENSMUSG00000021248, ENSMUSG00000056296, ENSMUSG00000041720, ENSMUSG00000049775, ENSMUSG00000029512, ENSMUSG00000016534, ENSMUSG00000062995, ENSMUSG00000035392, ENSMUSG00000024941, ENSMUSG00000009394, ENSMUSG00000000416, ENSMUSG00000021687, ENSMUSG00000026553, ENSMUSG00000001036, ENSMUSG00000020986, ENSMUSG00000030058, ENSMUSG00000018481,…	1.61583	1.43281	0.0143281
GOTERM_CC_5	GO:0005743~mitochondrial inner membrane	102	0.00113187	ENSMUSG00000037916, ENSMUSG00000022450, ENSMUSG00000025968, ENSMUSG00000025204, ENSMUSG00000018042, ENSMUSG00000030451, ENSMUSG00000027199, ENSMUSG00000039176, ENSMUSG00000064345, ENSMUSG00000061518, ENSMUSG00000006057, ENSMUSG00000022956, ENSMUSG00000018574, ENSMUSG00000059534, ENSMUSG00000030541, ENSMUSG00000032047, ENSMUSG00000024259, ENSMUSG00000062580, ENSMUSG00000020402, ENSMUSG00000025781,…	1.32242	1.64076	0.0164076
GOTERM_CC_5	GO:0030659~cytoplasmic vesicle membrane	37	0.00128151	ENSMUSG00000037217, ENSMUSG00000070570, ENSMUSG00000039367, ENSMUSG00000021248, ENSMUSG00000056296, ENSMUSG00000041720, ENSMUSG00000029512, ENSMUSG00000016534, ENSMUSG00000062995, ENSMUSG00000035392, ENSMUSG00000024941, ENSMUSG00000009394, ENSMUSG00000000416, ENSMUSG00000021687, ENSMUSG00000026553, ENSMUSG00000001036, ENSMUSG00000020986, ENSMUSG00000018481, ENSMUSG00000030058, ENSMUSG00000015733,…	1.63208	1.8558	0.018558
GOTERM_CC_5	GO:0044432~endoplasmic reticulum part	81	0.00221303	ENSMUSG00000019428, ENSMUSG00000039530, ENSMUSG00000048482, ENSMUSG00000025240, ENSMUSG00000029616, ENSMUSG00000031545, ENSMUSG00000018042, ENSMUSG00000001467, ENSMUSG00000005615, ENSMUSG00000029781, ENSMUSG00000025823, ENSMUSG00000028207, ENSMUSG00000019877, ENSMUSG00000027198, ENSMUSG00000071650, ENSMUSG00000037470, ENSMUSG00000027963, ENSMUSG00000020571, ENSMUSG00000021313, ENSMUSG00000032042,…	1.34565	3.18455	0.0318455
GOTERM_CC_5	GO:0030118~clathrin coat	18	0.00234278	ENSMUSG00000002957, ENSMUSG00000035152, ENSMUSG00000039361, ENSMUSG00000003033, ENSMUSG00000031539, ENSMUSG00000032096, ENSMUSG00000021824, ENSMUSG00000060279, ENSMUSG00000028478, ENSMUSG00000047126, ENSMUSG00000022841, ENSMUSG00000022973, ENSMUSG00000031731, ENSMUSG00000033419, ENSMUSG00000033128, ENSMUSG00000009090, ENSMUSG00000030872, ENSMUSG00000001036	2.03167	3.36831	0.0336831
GOTERM_CC_5	GO:0005813~centrosome	59	0.00270314	ENSMUSG00000040860, ENSMUSG00000027550, ENSMUSG00000032504, ENSMUSG00000023764, ENSMUSG00000050812, ENSMUSG00000030397, ENSMUSG00000038416, ENSMUSG00000035437, ENSMUSG00000031922, ENSMUSG00000048799, ENSMUSG00000032118, ENSMUSG00000021597, ENSMUSG00000057113, ENSMUSG00000019971, ENSMUSG00000031347, ENSMUSG00000021870, ENSMUSG00000020687, ENSMUSG00000026504, ENSMUSG00000024290, ENSMUSG00000031592,…	1.41511	3.87693	0.0387693
GOTERM_CC_5	GO:0033279~ribosomal subunit	29	0.00275459	ENSMUSG00000036860, ENSMUSG00000021607, ENSMUSG00000006333, ENSMUSG00000015672, ENSMUSG00000061787, ENSMUSG00000001445, ENSMUSG00000081094, ENSMUSG00000024902, ENSMUSG00000060938, ENSMUSG00000020477, ENSMUSG00000034729, ENSMUSG00000014551, ENSMUSG00000025208, ENSMUSG00000029066, ENSMUSG00000030335, ENSMUSG00000022601, ENSMUSG00000025290, ENSMUSG00000049517, ENSMUSG00000057113, ENSMUSG00000002767,…	1.68622	3.94935	0.0394935
GOTERM_CC_5	GO:0008328~ionotropic glutamate receptor complex	10	0.00292406	ENSMUSG00000020524, ENSMUSG00000059003, ENSMUSG00000056073, ENSMUSG00000026959, ENSMUSG00000003378, ENSMUSG00000033981, ENSMUSG00000025892, ENSMUSG00000020886, ENSMUSG00000015766, ENSMUSG00000030209	2.74114	4.18751	0.0418751
GOTERM_CC_5	GO:0030863~cortical cytoskeleton	21	0.0030054	ENSMUSG00000038366, ENSMUSG00000038976, ENSMUSG00000022443, ENSMUSG00000015733, ENSMUSG00000031402, ENSMUSG00000031543, ENSMUSG00000029761, ENSMUSG00000028906, ENSMUSG00000070372, ENSMUSG00000027479, ENSMUSG00000067889, ENSMUSG00000029580, ENSMUSG00000028656, ENSMUSG00000019820, ENSMUSG00000057738, ENSMUSG00000032827, ENSMUSG00000028745, ENSMUSG00000031799, ENSMUSG00000045180, ENSMUSG00000020315,…	1.87418	4.30163	0.0430163
GOTERM_CC_5	GO:0033178~proton-transporting two-sector ATPase complex, catalytic domain	11	0.00427636	ENSMUSG00000019087, ENSMUSG00000022956, ENSMUSG00000022295, ENSMUSG00000052459, ENSMUSG00000025428, ENSMUSG00000019210, ENSMUSG00000006273, ENSMUSG00000033793, ENSMUSG00000025393, ENSMUSG00000025781, ENSMUSG00000021114	2.48315	6.06836	0.0606836
GOTERM_CC_5	GO:0035253~ciliary rootlet	8	0.00450203	ENSMUSG00000040860, ENSMUSG00000006740, ENSMUSG00000022892, ENSMUSG00000026764, ENSMUSG00000019969, ENSMUSG00000024862, ENSMUSG00000021288, ENSMUSG00000074657	3.07008	6.37885	0.0637885
GOTERM_CC_5	GO:0070469~respiratory chain	28	0.00461741	ENSMUSG00000037916, ENSMUSG00000025968, ENSMUSG00000005510, ENSMUSG00000063882, ENSMUSG00000022450, ENSMUSG00000020022, ENSMUSG00000025204, ENSMUSG00000027673, ENSMUSG00000020153, ENSMUSG00000021606, ENSMUSG00000064345, ENSMUSG00000002416, ENSMUSG00000041697, ENSMUSG00000021764, ENSMUSG00000059534, ENSMUSG00000025651, ENSMUSG00000030884, ENSMUSG00000024038, ENSMUSG00000023089, ENSMUSG00000013593,…	1.65312	6.53724	0.0653724
GOTERM_CC_5	GO:0033267~axon part	14	0.0049228	ENSMUSG00000026830, ENSMUSG00000041607, ENSMUSG00000052516, ENSMUSG00000064329, ENSMUSG00000042429, ENSMUSG00000004113, ENSMUSG00000005871, ENSMUSG00000055254, ENSMUSG00000033676, ENSMUSG00000023050, ENSMUSG00000063142, ENSMUSG00000024163, ENSMUSG00000005089, ENSMUSG00000031391	2.14905	6.95525	0.0695525
GOTERM_CC_5	GO:0015934~large ribosomal subunit	19	0.00528675	ENSMUSG00000036860, ENSMUSG00000021607, ENSMUSG00000002767, ENSMUSG00000015672, ENSMUSG00000001445, ENSMUSG00000062328, ENSMUSG00000008682, ENSMUSG00000081094, ENSMUSG00000024902, ENSMUSG00000074129, ENSMUSG00000060938, ENSMUSG00000028772, ENSMUSG00000020477, ENSMUSG00000030879, ENSMUSG00000025208, ENSMUSG00000029066, ENSMUSG00000030335, ENSMUSG00000022601, ENSMUSG00000057113	1.8696	7.45115	0.0745115
GOTERM_CC_5	GO:0016469~proton-transporting two-sector ATPase complex	20	0.0055245	ENSMUSG00000019302, ENSMUSG00000022295, ENSMUSG00000052459, ENSMUSG00000019210, ENSMUSG00000025781, ENSMUSG00000018770, ENSMUSG00000034566, ENSMUSG00000006057, ENSMUSG00000000563, ENSMUSG00000019087, ENSMUSG00000022956, ENSMUSG00000025428, ENSMUSG00000006273, ENSMUSG00000033793, ENSMUSG00000033379, ENSMUSG00000039105, ENSMUSG00000024121, ENSMUSG00000025393, ENSMUSG00000038600, ENSMUSG00000021114	1.82743	7.77375	0.0777375
GOTERM_CC_5	GO:0034708~methyltransferase complex	13	0.00660971	ENSMUSG00000002028, ENSMUSG00000048154, ENSMUSG00000004698, ENSMUSG00000038369, ENSMUSG00000037369, ENSMUSG00000029004, ENSMUSG00000006307, ENSMUSG00000021488, ENSMUSG00000038056, ENSMUSG00000042308, ENSMUSG00000024947, ENSMUSG00000009575, ENSMUSG00000030680	2.16908	9.23304	0.0923304
GOTERM_CC_5	GO:0035097~histone methyltransferase complex	13	0.00660971	ENSMUSG00000002028, ENSMUSG00000048154, ENSMUSG00000004698, ENSMUSG00000038369, ENSMUSG00000037369, ENSMUSG00000029004, ENSMUSG00000006307, ENSMUSG00000021488, ENSMUSG00000038056, ENSMUSG00000042308, ENSMUSG00000024947, ENSMUSG00000009575, ENSMUSG00000030680	2.16908	9.23304	0.0923304
GOTERM_MF_5	GO:0032559~adenyl ribonucleotide binding	518	1.31945e-30	ENSMUSG00000053289, ENSMUSG00000018707, ENSMUSG00000026393, ENSMUSG00000033065, ENSMUSG00000032501, ENSMUSG00000073563, ENSMUSG00000029580, ENSMUSG00000046947, ENSMUSG00000028708, ENSMUSG00000025613, ENSMUSG00000009394, ENSMUSG00000001016, ENSMUSG00000022262, ENSMUSG00000022263, ENSMUSG00000052981, ENSMUSG00000019970, ENSMUSG00000026260, ENSMUSG00000033161, ENSMUSG00000020115, ENSMUSG00000024359,…	1.52511	1.8671e-27	1.8671e-29
GOTERM_MF_5	GO:0016462~pyrophosphatase activity	234	6.23428e-15	ENSMUSG00000053289, ENSMUSG00000018707, ENSMUSG00000024639, ENSMUSG00000064037, ENSMUSG00000019977, ENSMUSG00000022956, ENSMUSG00000022789, ENSMUSG00000033379, ENSMUSG00000010086, ENSMUSG00000022262, ENSMUSG00000024772, ENSMUSG00000034187, ENSMUSG00000042699, ENSMUSG00000001525, ENSMUSG00000029169, ENSMUSG00000003660, ENSMUSG00000033161, ENSMUSG00000000001, ENSMUSG00000025781, ENSMUSG00000025885,…	1.57166	8.79297e-12	8.79297e-14
GOTERM_MF_5	GO:0004672~protein kinase activity	205	2.58931e-11	ENSMUSG00000031783, ENSMUSG00000026393, ENSMUSG00000001127, ENSMUSG00000032501, ENSMUSG00000022781, ENSMUSG00000073563, ENSMUSG00000030397, ENSMUSG00000046947, ENSMUSG00000028708, ENSMUSG00000022263, ENSMUSG00000019970, ENSMUSG00000024789, ENSMUSG00000020115, ENSMUSG00000021279, ENSMUSG00000020601, ENSMUSG00000062234, ENSMUSG00000042046, ENSMUSG00000006599, ENSMUSG00000024382, ENSMUSG00000009681,…	1.5115	3.66403e-08	3.66403e-10
GOTERM_MF_5	GO:0019787~small conjugating protein ligase activity	63	9.67118e-11	ENSMUSG00000032307, ENSMUSG00000027011, ENSMUSG00000005371, ENSMUSG00000038965, ENSMUSG00000035247, ENSMUSG00000026739, ENSMUSG00000023977, ENSMUSG00000030451, ENSMUSG00000051234, ENSMUSG00000024019, ENSMUSG00000032216, ENSMUSG00000041058, ENSMUSG00000029686, ENSMUSG00000052981, ENSMUSG00000036840, ENSMUSG00000025939, ENSMUSG00000024294, ENSMUSG00000035293, ENSMUSG00000020738, ENSMUSG00000022771,…	2.16648	1.36853e-07	1.36853e-09
GOTERM_MF_5	GO:0046914~transition metal ion binding	701	3.93e-07	ENSMUSG00000033060, ENSMUSG00000037916, ENSMUSG00000025203, ENSMUSG00000025793, ENSMUSG00000018196, ENSMUSG00000025616, ENSMUSG00000042726, ENSMUSG00000039367, ENSMUSG00000028700, ENSMUSG00000053286, ENSMUSG00000038418, ENSMUSG00000061518, ENSMUSG00000021514, ENSMUSG00000042446, ENSMUSG00000061911, ENSMUSG00000003273, ENSMUSG00000010086, ENSMUSG00000059474, ENSMUSG00000028901, ENSMUSG00000053581,…	1.15541	0.000556117	5.56117e-06
GOTERM_MF_5	GO:0019901~protein kinase binding	35	4.52472e-06	ENSMUSG00000025658, ENSMUSG00000020151, ENSMUSG00000005534, ENSMUSG00000025422, ENSMUSG00000032604, ENSMUSG00000020372, ENSMUSG00000060261, ENSMUSG00000051391, ENSMUSG00000069662, ENSMUSG00000032740, ENSMUSG00000023277, ENSMUSG00000055980, ENSMUSG00000068206, ENSMUSG00000031328, ENSMUSG00000024271, ENSMUSG00000054226, ENSMUSG00000031555, ENSMUSG00000030557, ENSMUSG00000022770, ENSMUSG00000039166,…	2.11901	0.00640256	6.40256e-05
GOTERM_MF_5	GO:0008017~microtubule binding	30	2.67429e-05	ENSMUSG00000034593, ENSMUSG00000037234, ENSMUSG00000055407, ENSMUSG00000049550, ENSMUSG00000018411, ENSMUSG00000028649, ENSMUSG00000030397, ENSMUSG00000066306, ENSMUSG00000033392, ENSMUSG00000003810, ENSMUSG00000005871, ENSMUSG00000021573, ENSMUSG00000029757, ENSMUSG00000031922, ENSMUSG00000026131, ENSMUSG00000019971, ENSMUSG00000032740, ENSMUSG00000020716, ENSMUSG00000018481, ENSMUSG00000024277,…	2.11405	0.0378361	0.000378361
GOTERM_MF_5	GO:0032561~guanyl ribonucleotide binding	118	4.35032e-05	ENSMUSG00000028057, ENSMUSG00000059248, ENSMUSG00000029430, ENSMUSG00000001847, ENSMUSG00000047187, ENSMUSG00000030643, ENSMUSG00000024639, ENSMUSG00000064037, ENSMUSG00000015961, ENSMUSG00000029020, ENSMUSG00000019977, ENSMUSG00000028646, ENSMUSG00000058672, ENSMUSG00000022789, ENSMUSG00000010086, ENSMUSG00000032042, ENSMUSG00000020671, ENSMUSG00000024772, ENSMUSG00000001525, ENSMUSG00000021062,…	1.39733	0.0615421	0.000615421
GOTERM_MF_5	GO:0042625~ATPase activity, coupled to transmembrane movement of ions	32	5.67256e-05	ENSMUSG00000060671, ENSMUSG00000019210, ENSMUSG00000040907, ENSMUSG00000037685, ENSMUSG00000024566, ENSMUSG00000021983, ENSMUSG00000019943, ENSMUSG00000026576, ENSMUSG00000019087, ENSMUSG00000022956, ENSMUSG00000036622, ENSMUSG00000025428, ENSMUSG00000033793, ENSMUSG00000006273, ENSMUSG00000033379, ENSMUSG00000029467, ENSMUSG00000022295, ENSMUSG00000033161, ENSMUSG00000052459, ENSMUSG00000032570,…	1.99354	0.0802402	0.000802402
GOTERM_MF_5	GO:0005088~Ras guanyl-nucleotide exchange factor activity	36	9.66383e-05	ENSMUSG00000031442, ENSMUSG00000031133, ENSMUSG00000009681, ENSMUSG00000021662, ENSMUSG00000037415, ENSMUSG00000030839, ENSMUSG00000037509, ENSMUSG00000034801, ENSMUSG00000066129, ENSMUSG00000040687, ENSMUSG00000032875, ENSMUSG00000025558, ENSMUSG00000025555, ENSMUSG00000022788, ENSMUSG00000059495, ENSMUSG00000022263, ENSMUSG00000025656, ENSMUSG00000021215, ENSMUSG00000028896, ENSMUSG00000039713,…	1.86444	0.136662	0.00136662
GOTERM_MF_5	GO:0004221~ubiquitin thiolesterase activity	32	0.000109846	ENSMUSG00000026914, ENSMUSG00000018189, ENSMUSG00000031154, ENSMUSG00000047879, ENSMUSG00000025616, ENSMUSG00000028514, ENSMUSG00000000804, ENSMUSG00000062627, ENSMUSG00000027363, ENSMUSG00000059263, ENSMUSG00000036712, ENSMUSG00000031010, ENSMUSG00000054814, ENSMUSG00000031066, ENSMUSG00000028560, ENSMUSG00000020124, ENSMUSG00000043411, ENSMUSG00000031826, ENSMUSG00000051306, ENSMUSG00000022710,…	1.93738	0.155326	0.00155326
GOTERM_MF_5	GO:0031267~small GTPase binding	28	0.00011456	ENSMUSG00000030172, ENSMUSG00000037386, ENSMUSG00000041670, ENSMUSG00000022100, ENSMUSG00000041268, ENSMUSG00000036053, ENSMUSG00000037415, ENSMUSG00000031284, ENSMUSG00000025558, ENSMUSG00000021357, ENSMUSG00000020263, ENSMUSG00000020121, ENSMUSG00000042303, ENSMUSG00000031328, ENSMUSG00000034480, ENSMUSG00000038665, ENSMUSG00000024456, ENSMUSG00000024096, ENSMUSG00000041879, ENSMUSG00000035901,…	2.04	0.161987	0.00161987
GOTERM_MF_5	GO:0015405~P-P-bond-hydrolysis-driven transmembrane transporter activity	43	0.000146793	ENSMUSG00000060671, ENSMUSG00000078974, ENSMUSG00000019210, ENSMUSG00000040907, ENSMUSG00000037685, ENSMUSG00000024566, ENSMUSG00000021983, ENSMUSG00000019943, ENSMUSG00000022822, ENSMUSG00000026576, ENSMUSG00000019087, ENSMUSG00000022956, ENSMUSG00000036622, ENSMUSG00000025428, ENSMUSG00000033379, ENSMUSG00000033793, ENSMUSG00000006273, ENSMUSG00000031158, ENSMUSG00000031333, ENSMUSG00000040584,…	1.72746	0.207521	0.00207521
GOTERM_MF_5	GO:0003713~transcription coactivator activity	40	0.000291747	ENSMUSG00000009569, ENSMUSG00000043962, ENSMUSG00000024309, ENSMUSG00000038369, ENSMUSG00000019302, ENSMUSG00000042292, ENSMUSG00000025616, ENSMUSG00000061315, ENSMUSG00000055024, ENSMUSG00000062627, ENSMUSG00000036986, ENSMUSG00000060534, ENSMUSG00000029004, ENSMUSG00000022521, ENSMUSG00000002455, ENSMUSG00000002307, ENSMUSG00000025326, ENSMUSG00000044475, ENSMUSG00000021039, ENSMUSG00000073422,…	1.71943	0.412049	0.00412049
GOTERM_MF_5	GO:0019903~protein phosphatase binding	12	0.000314356	ENSMUSG00000042772, ENSMUSG00000006932, ENSMUSG00000030718, ENSMUSG00000039515, ENSMUSG00000022982, ENSMUSG00000024304, ENSMUSG00000024908, ENSMUSG00000036561, ENSMUSG00000001415, ENSMUSG00000005534, ENSMUSG00000034101, ENSMUSG00000052296	3.03428	0.443914	0.00443914
GOTERM_MF_5	GO:0000287~magnesium ion binding	126	0.000317999	ENSMUSG00000024969, ENSMUSG00000001323, ENSMUSG00000024566, ENSMUSG00000025791, ENSMUSG00000025894, ENSMUSG00000053907, ENSMUSG00000026393, ENSMUSG00000033065, ENSMUSG00000039176, ENSMUSG00000015961, ENSMUSG00000022840, ENSMUSG00000036622, ENSMUSG00000052155, ENSMUSG00000002844, ENSMUSG00000049225, ENSMUSG00000030541, ENSMUSG00000034187, ENSMUSG00000033161, ENSMUSG00000032570, ENSMUSG00000034751,…	1.32425	0.449048	0.00449048
GOTERM_MF_5	GO:0008060~ARF GTPase activator activity	14	0.000586397	ENSMUSG00000023353, ENSMUSG00000052632, ENSMUSG00000027255, ENSMUSG00000026159, ENSMUSG00000011877, ENSMUSG00000022377, ENSMUSG00000037999, ENSMUSG00000049076, ENSMUSG00000026155, ENSMUSG00000027575, ENSMUSG00000032870, ENSMUSG00000054277, ENSMUSG00000025422, ENSMUSG00000055013	2.61652	0.826595	0.00826595
GOTERM_MF_5	GO:0035257~nuclear hormone receptor binding	18	0.000595389	ENSMUSG00000024309, ENSMUSG00000038369, ENSMUSG00000019302, ENSMUSG00000030357, ENSMUSG00000021488, ENSMUSG00000030852, ENSMUSG00000018501, ENSMUSG00000018965, ENSMUSG00000048546, ENSMUSG00000005886, ENSMUSG00000002307, ENSMUSG00000002455, ENSMUSG00000029599, ENSMUSG00000020647, ENSMUSG00000018160, ENSMUSG00000021039, ENSMUSG00000073422, ENSMUSG00000025878	2.27571	0.839222	0.00839222
GOTERM_MF_5	GO:0016791~phosphatase activity	77	0.00121421	ENSMUSG00000013236, ENSMUSG00000004455, ENSMUSG00000025240, ENSMUSG00000028909, ENSMUSG00000043733, ENSMUSG00000024052, ENSMUSG00000028788, ENSMUSG00000046442, ENSMUSG00000044667, ENSMUSG00000049225, ENSMUSG00000039431, ENSMUSG00000033411, ENSMUSG00000011752, ENSMUSG00000030223, ENSMUSG00000033161, ENSMUSG00000028161, ENSMUSG00000029462, ENSMUSG00000026113, ENSMUSG00000041231, ENSMUSG00000029326,…	1.39071	1.70453	0.0170453
GOTERM_MF_5	GO:0042626~ATPase activity, coupled to transmembrane movement of substances	37	0.00142229	ENSMUSG00000060671, ENSMUSG00000019210, ENSMUSG00000040907, ENSMUSG00000037685, ENSMUSG00000024566, ENSMUSG00000021983, ENSMUSG00000019943, ENSMUSG00000022822, ENSMUSG00000026576, ENSMUSG00000019087, ENSMUSG00000022956, ENSMUSG00000036622, ENSMUSG00000025428, ENSMUSG00000033793, ENSMUSG00000006273, ENSMUSG00000033379, ENSMUSG00000031333, ENSMUSG00000040584, ENSMUSG00000029467, ENSMUSG00000022295,…	1.63966	1.99392	0.0199392
GOTERM_MF_5	GO:0005099~Ras GTPase activator activity	27	0.00186194	ENSMUSG00000052302, ENSMUSG00000042203, ENSMUSG00000031523, ENSMUSG00000036644, ENSMUSG00000020121, ENSMUSG00000036473, ENSMUSG00000035437, ENSMUSG00000011831, ENSMUSG00000036104, ENSMUSG00000022364, ENSMUSG00000042303, ENSMUSG00000011832, ENSMUSG00000031355, ENSMUSG00000037148, ENSMUSG00000048720, ENSMUSG00000024096, ENSMUSG00000038351, ENSMUSG00000021676, ENSMUSG00000022391, ENSMUSG00000048960,…	1.78556	2.60274	0.0260274
GOTERM_MF_5	GO:0008170~N-methyltransferase activity	20	0.00266078	ENSMUSG00000002028, ENSMUSG00000052429, ENSMUSG00000013787, ENSMUSG00000028053, ENSMUSG00000045098, ENSMUSG00000049327, ENSMUSG00000021488, ENSMUSG00000006307, ENSMUSG00000026986, ENSMUSG00000015697, ENSMUSG00000057406, ENSMUSG00000038384, ENSMUSG00000009535, ENSMUSG00000053286, ENSMUSG00000037111, ENSMUSG00000029004, ENSMUSG00000054823, ENSMUSG00000060098, ENSMUSG00000038056, ENSMUSG00000001909	1.9539	3.69999	0.0369999
GOTERM_MF_5	GO:0008066~glutamate receptor activity	18	0.00279843	ENSMUSG00000001986, ENSMUSG00000023192, ENSMUSG00000033981, ENSMUSG00000025892, ENSMUSG00000019828, ENSMUSG00000020460, ENSMUSG00000030209, ENSMUSG00000041078, ENSMUSG00000024462, ENSMUSG00000019505, ENSMUSG00000056755, ENSMUSG00000020524, ENSMUSG00000056073, ENSMUSG00000059003, ENSMUSG00000026959, ENSMUSG00000039809, ENSMUSG00000003378, ENSMUSG00000003974, ENSMUSG00000049583, ENSMUSG00000055553	2.03616	3.8879	0.038879
GOTERM_MF_5	GO:0017075~syntaxin-1 binding	7	0.00283074	ENSMUSG00000020894, ENSMUSG00000033615, ENSMUSG00000031144, ENSMUSG00000019790, ENSMUSG00000027273, ENSMUSG00000026797, ENSMUSG00000025867	3.76125	3.93196	0.0393196
GOTERM_MF_5	GO:0051015~actin filament binding	21	0.00457535	ENSMUSG00000038366, ENSMUSG00000033577, ENSMUSG00000034593, ENSMUSG00000031328, ENSMUSG00000022443, ENSMUSG00000020476, ENSMUSG00000026830, ENSMUSG00000052397, ENSMUSG00000037815, ENSMUSG00000030707, ENSMUSG00000035934, ENSMUSG00000033066, ENSMUSG00000020900, ENSMUSG00000023022, ENSMUSG00000030447, ENSMUSG00000019820, ENSMUSG00000024120, ENSMUSG00000039057, ENSMUSG00000045180, ENSMUSG00000015143,…	1.84224	6.28318	0.0628318

## Sheet: overlap all SI
Category	Term	Count	PValue	Genes	Fold Enrichment	FDR [%]	FDR faction
KEGG_PATHWAY	mmu04720:Long-term potentiation	7	0.00135179	ENSMUSG00000063358, ENSMUSG00000030102, ENSMUSG00000033981, ENSMUSG00000049583, ENSMUSG00000019370, ENSMUSG00000024617, ENSMUSG00000051177	5.62549	1.49297	0.0149297
KEGG_PATHWAY	mmu04722:Neurotrophin signaling pathway	8	0.00767344	ENSMUSG00000055254, ENSMUSG00000036333, ENSMUSG00000063358, ENSMUSG00000004056, ENSMUSG00000019370, ENSMUSG00000021936, ENSMUSG00000071369, ENSMUSG00000024617	3.46184	8.20927	0.0820927
KEGG_PATHWAY	mmu04730:Long-term depression	6	0.00842911	ENSMUSG00000001986, ENSMUSG00000063358, ENSMUSG00000030102, ENSMUSG00000033981, ENSMUSG00000049583, ENSMUSG00000051177	4.68791	8.98357	0.0898357
GOTERM_BP_5	GO:0007268~synaptic transmission	13	1.26777e-05	ENSMUSG00000052572, ENSMUSG00000047879, ENSMUSG00000020402, ENSMUSG00000025892, ENSMUSG00000033981, ENSMUSG00000026797, ENSMUSG00000009394, ENSMUSG00000022973, ENSMUSG00000027273, ENSMUSG00000063077, ENSMUSG00000022607, ENSMUSG00000008892, ENSMUSG00000066392	4.92456	0.0192349	0.000192349
GOTERM_BP_5	GO:0000904~cell morphogenesis involved in differentiation	13	7.127e-05	ENSMUSG00000020598, ENSMUSG00000037032, ENSMUSG00000022443, ENSMUSG00000038970, ENSMUSG00000069601, ENSMUSG00000026797, ENSMUSG00000004364, ENSMUSG00000028832, ENSMUSG00000027797, ENSMUSG00000026442, ENSMUSG00000005871, ENSMUSG00000022607, ENSMUSG00000026131	4.13477	0.108088	0.00108088
GOTERM_BP_5	GO:0007409~axonogenesis	11	0.000149359	ENSMUSG00000020598, ENSMUSG00000027797, ENSMUSG00000037032, ENSMUSG00000026442, ENSMUSG00000005871, ENSMUSG00000038970, ENSMUSG00000069601, ENSMUSG00000026797, ENSMUSG00000022607, ENSMUSG00000026131, ENSMUSG00000028832	4.55039	0.226391	0.00226391
GOTERM_BP_5	GO:0044267~cellular protein metabolic process	51	0.000221263	ENSMUSG00000005371, ENSMUSG00000031154, ENSMUSG00000047879, ENSMUSG00000030451, ENSMUSG00000022884, ENSMUSG00000032604, ENSMUSG00000004364, ENSMUSG00000004865, ENSMUSG00000029686, ENSMUSG00000022607, ENSMUSG00000025290, ENSMUSG00000021870, ENSMUSG00000022443, ENSMUSG00000063358, ENSMUSG00000032536, ENSMUSG00000030779, ENSMUSG00000023927, ENSMUSG00000055254, ENSMUSG00000020048, ENSMUSG00000021936,…	1.64696	0.335209	0.00335209
GOTERM_BP_5	GO:0048812~neuron projection morphogenesis	11	0.000278773	ENSMUSG00000020598, ENSMUSG00000027797, ENSMUSG00000037032, ENSMUSG00000026442, ENSMUSG00000005871, ENSMUSG00000038970, ENSMUSG00000069601, ENSMUSG00000026797, ENSMUSG00000022607, ENSMUSG00000026131, ENSMUSG00000028832	4.21429	0.422164	0.00422164
GOTERM_BP_5	GO:0007611~learning or memory	8	0.000336546	ENSMUSG00000037032, ENSMUSG00000037996, ENSMUSG00000040907, ENSMUSG00000022973, ENSMUSG00000021314, ENSMUSG00000020402, ENSMUSG00000049583, ENSMUSG00000008892	6.061	0.509446	0.00509446
GOTERM_BP_5	GO:0048667~cell morphogenesis involved in neuron differentiation	11	0.000364695	ENSMUSG00000020598, ENSMUSG00000027797, ENSMUSG00000037032, ENSMUSG00000026442, ENSMUSG00000005871, ENSMUSG00000038970, ENSMUSG00000069601, ENSMUSG00000026797, ENSMUSG00000022607, ENSMUSG00000026131, ENSMUSG00000028832	4.07535	0.551945	0.00551945
GOTERM_BP_5	GO:0007242~intracellular signaling cascade	28	0.000404442	ENSMUSG00000031442, ENSMUSG00000004071, ENSMUSG00000034799, ENSMUSG00000025658, ENSMUSG00000052139, ENSMUSG00000041444, ENSMUSG00000027363, ENSMUSG00000025422, ENSMUSG00000071369, ENSMUSG00000037706, ENSMUSG00000004865, ENSMUSG00000022973, ENSMUSG00000051177, ENSMUSG00000049044, ENSMUSG00000028945, ENSMUSG00000041992, ENSMUSG00000017631, ENSMUSG00000063358, ENSMUSG00000026490, ENSMUSG00000024096,…	2.06339	0.611927	0.00611927
GOTERM_BP_5	GO:0032940~secretion by cell	11	0.00043209	ENSMUSG00000034799, ENSMUSG00000041670, ENSMUSG00000009394, ENSMUSG00000022973, ENSMUSG00000055254, ENSMUSG00000021687, ENSMUSG00000027273, ENSMUSG00000026797, ENSMUSG00000022587, ENSMUSG00000066392, ENSMUSG00000049044	3.98771	0.653631	0.00653631
GOTERM_BP_5	GO:0048488~synaptic vesicle endocytosis	4	0.000629418	ENSMUSG00000034799, ENSMUSG00000022973, ENSMUSG00000021314, ENSMUSG00000026797	22.4762	0.950805	0.00950805
GOTERM_BP_5	GO:0009966~regulation of signal transduction	22	0.000738068	ENSMUSG00000031442, ENSMUSG00000040249, ENSMUSG00000041992, ENSMUSG00000031996, ENSMUSG00000025658, ENSMUSG00000001986, ENSMUSG00000037126, ENSMUSG00000017631, ENSMUSG00000042700, ENSMUSG00000033981, ENSMUSG00000024096, ENSMUSG00000074781, ENSMUSG00000025422, ENSMUSG00000071369, ENSMUSG00000004207, ENSMUSG00000025555, ENSMUSG00000027255, ENSMUSG00000037706, ENSMUSG00000005871, ENSMUSG00000004056,…	2.24422	1.11408	0.0111408
GOTERM_BP_5	GO:0048858~cell projection morphogenesis	11	0.000823954	ENSMUSG00000020598, ENSMUSG00000027797, ENSMUSG00000037032, ENSMUSG00000026442, ENSMUSG00000005871, ENSMUSG00000038970, ENSMUSG00000069601, ENSMUSG00000026797, ENSMUSG00000022607, ENSMUSG00000026131, ENSMUSG00000028832	3.67185	1.24296	0.0124296
GOTERM_BP_5	GO:0032990~cell part morphogenesis	11	0.00119104	ENSMUSG00000020598, ENSMUSG00000027797, ENSMUSG00000037032, ENSMUSG00000026442, ENSMUSG00000005871, ENSMUSG00000038970, ENSMUSG00000069601, ENSMUSG00000026797, ENSMUSG00000022607, ENSMUSG00000026131, ENSMUSG00000028832	3.49865	1.79206	0.0179206
GOTERM_BP_5	GO:0031175~neuron projection development	11	0.00146643	ENSMUSG00000020598, ENSMUSG00000027797, ENSMUSG00000037032, ENSMUSG00000026442, ENSMUSG00000005871, ENSMUSG00000038970, ENSMUSG00000069601, ENSMUSG00000026797, ENSMUSG00000022607, ENSMUSG00000026131, ENSMUSG00000028832	3.40236	2.20212	0.0220212
GOTERM_BP_5	GO:0050821~protein stabilization	4	0.00153403	ENSMUSG00000027002, ENSMUSG00000041879, ENSMUSG00000037032, ENSMUSG00000026797	16.8571	2.30254	0.0230254
GOTERM_BP_5	GO:0051056~regulation of small GTPase mediated signal transduction	11	0.00204464	ENSMUSG00000031442, ENSMUSG00000041992, ENSMUSG00000025555, ENSMUSG00000027255, ENSMUSG00000037126, ENSMUSG00000017631, ENSMUSG00000042700, ENSMUSG00000024096, ENSMUSG00000041977, ENSMUSG00000025422, ENSMUSG00000049044	3.25313	3.0579	0.030579
GOTERM_BP_5	GO:0000902~cell morphogenesis	13	0.00210632	ENSMUSG00000020598, ENSMUSG00000037032, ENSMUSG00000022443, ENSMUSG00000038970, ENSMUSG00000069601, ENSMUSG00000026797, ENSMUSG00000004364, ENSMUSG00000028832, ENSMUSG00000027797, ENSMUSG00000026442, ENSMUSG00000005871, ENSMUSG00000022607, ENSMUSG00000026131	2.8368	3.14878	0.0314878
GOTERM_BP_5	GO:0009142~nucleoside triphosphate biosynthetic process	7	0.00278357	ENSMUSG00000026576, ENSMUSG00000020857, ENSMUSG00000037601, ENSMUSG00000019302, ENSMUSG00000040907, ENSMUSG00000025781, ENSMUSG00000000563	4.96842	4.14137	0.0414137
GOTERM_BP_5	GO:0030163~protein catabolic process	18	0.00353177	ENSMUSG00000064061, ENSMUSG00000005371, ENSMUSG00000002102, ENSMUSG00000031154, ENSMUSG00000022443, ENSMUSG00000047879, ENSMUSG00000030816, ENSMUSG00000027363, ENSMUSG00000028086, ENSMUSG00000030451, ENSMUSG00000036712, ENSMUSG00000004364, ENSMUSG00000074781, ENSMUSG00000031095, ENSMUSG00000017843, ENSMUSG00000020048, ENSMUSG00000029686, ENSMUSG00000055553	2.18294	5.22689	0.0522689
GOTERM_BP_5	GO:0050804~regulation of synaptic transmission	7	0.00359454	ENSMUSG00000037996, ENSMUSG00000041670, ENSMUSG00000055254, ENSMUSG00000033981, ENSMUSG00000049583, ENSMUSG00000026797, ENSMUSG00000024617	4.72	5.31743	0.0531743
GOTERM_BP_5	GO:0048666~neuron development	12	0.00403455	ENSMUSG00000020598, ENSMUSG00000027797, ENSMUSG00000037032, ENSMUSG00000026442, ENSMUSG00000005871, ENSMUSG00000055254, ENSMUSG00000038970, ENSMUSG00000069601, ENSMUSG00000026797, ENSMUSG00000022607, ENSMUSG00000026131, ENSMUSG00000028832	2.77104	5.94989	0.0594989
GOTERM_BP_5	GO:0009144~purine nucleoside triphosphate metabolic process	7	0.00478554	ENSMUSG00000026576, ENSMUSG00000020857, ENSMUSG00000037601, ENSMUSG00000019302, ENSMUSG00000040907, ENSMUSG00000025781, ENSMUSG00000000563	4.45283	7.02021	0.0702021
GOTERM_BP_5	GO:0007264~small GTPase mediated signal transduction	11	0.00495082	ENSMUSG00000031442, ENSMUSG00000077450, ENSMUSG00000041992, ENSMUSG00000015087, ENSMUSG00000041444, ENSMUSG00000027363, ENSMUSG00000024096, ENSMUSG00000025422, ENSMUSG00000028945, ENSMUSG00000004771, ENSMUSG00000049044	2.87486	7.25424	0.0725424
GOTERM_BP_5	GO:0051969~regulation of transmission of nerve impulse	7	0.00500921	ENSMUSG00000037996, ENSMUSG00000041670, ENSMUSG00000055254, ENSMUSG00000033981, ENSMUSG00000049583, ENSMUSG00000026797, ENSMUSG00000024617	4.41121	7.3368	0.073368
GOTERM_BP_5	GO:0031647~regulation of protein stability	4	0.00571626	ENSMUSG00000027002, ENSMUSG00000041879, ENSMUSG00000037032, ENSMUSG00000026797	10.7886	8.33092	0.0833092
GOTERM_BP_5	GO:0044257~cellular protein catabolic process	17	0.00589783	ENSMUSG00000064061, ENSMUSG00000005371, ENSMUSG00000031154, ENSMUSG00000022443, ENSMUSG00000047879, ENSMUSG00000030816, ENSMUSG00000027363, ENSMUSG00000028086, ENSMUSG00000030451, ENSMUSG00000036712, ENSMUSG00000004364, ENSMUSG00000074781, ENSMUSG00000031095, ENSMUSG00000017843, ENSMUSG00000020048, ENSMUSG00000029686, ENSMUSG00000055553	2.13461	8.5846	0.085846
GOTERM_BP_5	GO:0009260~ribonucleotide biosynthetic process	7	0.00598129	ENSMUSG00000026576, ENSMUSG00000020857, ENSMUSG00000037601, ENSMUSG00000019302, ENSMUSG00000040907, ENSMUSG00000025781, ENSMUSG00000000563	4.25225	8.70098	0.0870098
GOTERM_BP_5	GO:0031644~regulation of neurological system process	7	0.00651583	ENSMUSG00000037996, ENSMUSG00000041670, ENSMUSG00000055254, ENSMUSG00000033981, ENSMUSG00000049583, ENSMUSG00000026797, ENSMUSG00000024617	4.17699	9.44312	0.0944312
GOTERM_BP_5	GO:0006897~endocytosis	9	0.00673887	ENSMUSG00000037601, ENSMUSG00000040249, ENSMUSG00000034799, ENSMUSG00000022973, ENSMUSG00000021314, ENSMUSG00000040990, ENSMUSG00000033981, ENSMUSG00000026825, ENSMUSG00000026797	3.22796	9.75112	0.0975112
GOTERM_CC_5	GO:0044446~intracellular organelle part	78	5.70521e-07	ENSMUSG00000038084, ENSMUSG00000020333, ENSMUSG00000001986, ENSMUSG00000079470, ENSMUSG00000018474, ENSMUSG00000007617, ENSMUSG00000043940, ENSMUSG00000043535, ENSMUSG00000037236, ENSMUSG00000018707, ENSMUSG00000027193, ENSMUSG00000030451, ENSMUSG00000019370, ENSMUSG00000054766, ENSMUSG00000000787, ENSMUSG00000009394, ENSMUSG00000033732, ENSMUSG00000052293, ENSMUSG00000021595, ENSMUSG00000025290,…	1.68918	0.000721352	7.21352e-06
GOTERM_CC_5	GO:0005737~cytoplasm	129	5.77566e-07	ENSMUSG00000031442, ENSMUSG00000043940, ENSMUSG00000041268, ENSMUSG00000075376, ENSMUSG00000018707, ENSMUSG00000027193, ENSMUSG00000030451, ENSMUSG00000054728, ENSMUSG00000032503, ENSMUSG00000019370, ENSMUSG00000027255, ENSMUSG00000009394, ENSMUSG00000021314, ENSMUSG00000021595, ENSMUSG00000025290, ENSMUSG00000073422, ENSMUSG00000049044, ENSMUSG00000040249, ENSMUSG00000001525, ENSMUSG00000022443,…	1.37955	0.00073026	7.3026e-06
GOTERM_CC_5	GO:0030054~cell junction	23	1.14964e-06	ENSMUSG00000034799, ENSMUSG00000001986, ENSMUSG00000022443, ENSMUSG00000007617, ENSMUSG00000052572, ENSMUSG00000041670, ENSMUSG00000041444, ENSMUSG00000041268, ENSMUSG00000040990, ENSMUSG00000033981, ENSMUSG00000025892, ENSMUSG00000054728, ENSMUSG00000024617, ENSMUSG00000032076, ENSMUSG00000027799, ENSMUSG00000051375, ENSMUSG00000009394, ENSMUSG00000023036, ENSMUSG00000005871, ENSMUSG00000021314,…	3.38491	0.00145358	1.45358e-05
GOTERM_CC_5	GO:0043232~intracellular non-membrane-bounded organelle	54	1.40714e-06	ENSMUSG00000001986, ENSMUSG00000079470, ENSMUSG00000018474, ENSMUSG00000007617, ENSMUSG00000043535, ENSMUSG00000018707, ENSMUSG00000019370, ENSMUSG00000025555, ENSMUSG00000021314, ENSMUSG00000021595, ENSMUSG00000022607, ENSMUSG00000066551, ENSMUSG00000042699, ENSMUSG00000025290, ENSMUSG00000021870, ENSMUSG00000001525, ENSMUSG00000022443, ENSMUSG00000040990, ENSMUSG00000015002, ENSMUSG00000035086,…	1.94642	0.00177914	1.77914e-05
GOTERM_CC_5	GO:0043229~intracellular organelle	147	2.8739e-05	ENSMUSG00000004071, ENSMUSG00000001986, ENSMUSG00000043940, ENSMUSG00000032582, ENSMUSG00000041268, ENSMUSG00000027193, ENSMUSG00000018707, ENSMUSG00000030451, ENSMUSG00000007440, ENSMUSG00000019370, ENSMUSG00000027255, ENSMUSG00000009394, ENSMUSG00000038615, ENSMUSG00000021314, ENSMUSG00000021595, ENSMUSG00000025290, ENSMUSG00000073422, ENSMUSG00000042699, ENSMUSG00000040249, ENSMUSG00000001525,…	1.24212	0.036331	0.00036331
GOTERM_CC_5	GO:0014069~postsynaptic density	7	8.65557e-05	ENSMUSG00000001986, ENSMUSG00000007617, ENSMUSG00000052572, ENSMUSG00000041444, ENSMUSG00000055254, ENSMUSG00000030102, ENSMUSG00000033981	9.49391	0.109384	0.00109384
GOTERM_CC_5	GO:0019898~extrinsic to membrane	19	0.000164026	ENSMUSG00000034799, ENSMUSG00000025658, ENSMUSG00000041670, ENSMUSG00000043940, ENSMUSG00000041268, ENSMUSG00000040990, ENSMUSG00000035086, ENSMUSG00000030653, ENSMUSG00000002985, ENSMUSG00000024096, ENSMUSG00000022194, ENSMUSG00000027438, ENSMUSG00000025555, ENSMUSG00000031696, ENSMUSG00000027799, ENSMUSG00000026353, ENSMUSG00000037012, ENSMUSG00000004771, ENSMUSG00000049044	2.78438	0.207193	0.00207193
GOTERM_CC_5	GO:0005856~cytoskeleton	32	0.00032423	ENSMUSG00000001986, ENSMUSG00000057335, ENSMUSG00000007617, ENSMUSG00000041444, ENSMUSG00000055407, ENSMUSG00000018707, ENSMUSG00000024991, ENSMUSG00000019370, ENSMUSG00000037601, ENSMUSG00000025555, ENSMUSG00000005871, ENSMUSG00000021314, ENSMUSG00000026825, ENSMUSG00000022607, ENSMUSG00000026131, ENSMUSG00000021693, ENSMUSG00000021870, ENSMUSG00000001525, ENSMUSG00000022443, ENSMUSG00000052572,…	1.97276	0.409176	0.00409176
GOTERM_CC_5	GO:0044444~cytoplasmic part	84	0.000396808	ENSMUSG00000032294, ENSMUSG00000009905, ENSMUSG00000038084, ENSMUSG00000027419, ENSMUSG00000020333, ENSMUSG00000002102, ENSMUSG00000007617, ENSMUSG00000043940, ENSMUSG00000007891, ENSMUSG00000041268, ENSMUSG00000075376, ENSMUSG00000030451, ENSMUSG00000004364, ENSMUSG00000054766, ENSMUSG00000032181, ENSMUSG00000027255, ENSMUSG00000009394, ENSMUSG00000021314, ENSMUSG00000022607, ENSMUSG00000025290,…	1.38869	0.500559	0.00500559
GOTERM_CC_5	GO:0005624~membrane fraction	19	0.000417977	ENSMUSG00000053825, ENSMUSG00000040249, ENSMUSG00000001986, ENSMUSG00000020333, ENSMUSG00000007617, ENSMUSG00000047879, ENSMUSG00000024073, ENSMUSG00000040990, ENSMUSG00000030102, ENSMUSG00000033981, ENSMUSG00000069601, ENSMUSG00000032883, ENSMUSG00000007440, ENSMUSG00000037601, ENSMUSG00000037996, ENSMUSG00000023036, ENSMUSG00000027273, ENSMUSG00000008892, ENSMUSG00000073422	2.57692	0.527197	0.00527197
GOTERM_CC_5	GO:0031967~organelle envelope	19	0.000814518	ENSMUSG00000038084, ENSMUSG00000020333, ENSMUSG00000043940, ENSMUSG00000030102, ENSMUSG00000020402, ENSMUSG00000025781, ENSMUSG00000032883, ENSMUSG00000030451, ENSMUSG00000000563, ENSMUSG00000041879, ENSMUSG00000022194, ENSMUSG00000006005, ENSMUSG00000021987, ENSMUSG00000020458, ENSMUSG00000026353, ENSMUSG00000008892, ENSMUSG00000024500, ENSMUSG00000037012, ENSMUSG00000073422	2.43376	1.02499	0.0102499
GOTERM_CC_5	GO:0016023~cytoplasmic membrane-bounded vesicle	16	0.000972115	ENSMUSG00000027419, ENSMUSG00000019302, ENSMUSG00000007891, ENSMUSG00000041268, ENSMUSG00000033981, ENSMUSG00000035086, ENSMUSG00000032076, ENSMUSG00000077450, ENSMUSG00000032181, ENSMUSG00000009394, ENSMUSG00000021687, ENSMUSG00000021314, ENSMUSG00000020048, ENSMUSG00000027248, ENSMUSG00000063077, ENSMUSG00000026131	2.67323	1.22219	0.0122219
GOTERM_CC_5	GO:0005741~mitochondrial outer membrane	7	0.00102282	ENSMUSG00000038084, ENSMUSG00000020333, ENSMUSG00000020402, ENSMUSG00000032883, ENSMUSG00000008892, ENSMUSG00000037012, ENSMUSG00000024500	6.05237	1.28556	0.0128556
GOTERM_CC_5	GO:0031968~organelle outer membrane	7	0.00158205	ENSMUSG00000038084, ENSMUSG00000020333, ENSMUSG00000020402, ENSMUSG00000032883, ENSMUSG00000008892, ENSMUSG00000037012, ENSMUSG00000024500	5.56539	1.98199	0.0198199
GOTERM_CC_5	GO:0000151~ubiquitin ligase complex	6	0.00168747	ENSMUSG00000031095, ENSMUSG00000030779, ENSMUSG00000052139, ENSMUSG00000029686, ENSMUSG00000030451, ENSMUSG00000004364	6.91699	2.11277	0.0211277
GOTERM_CC_5	GO:0044428~nuclear part	32	0.00171479	ENSMUSG00000019302, ENSMUSG00000079470, ENSMUSG00000018474, ENSMUSG00000043940, ENSMUSG00000052139, ENSMUSG00000043535, ENSMUSG00000058558, ENSMUSG00000037236, ENSMUSG00000027193, ENSMUSG00000030451, ENSMUSG00000016559, ENSMUSG00000054766, ENSMUSG00000057236, ENSMUSG00000000787, ENSMUSG00000021244, ENSMUSG00000021987, ENSMUSG00000020458, ENSMUSG00000052293, ENSMUSG00000033732, ENSMUSG00000025982,…	1.78359	2.14663	0.0214663
GOTERM_CC_5	GO:0015630~microtubule cytoskeleton	16	0.0022081	ENSMUSG00000021693, ENSMUSG00000021870, ENSMUSG00000001525, ENSMUSG00000057335, ENSMUSG00000022443, ENSMUSG00000055407, ENSMUSG00000024991, ENSMUSG00000018707, ENSMUSG00000019370, ENSMUSG00000028832, ENSMUSG00000037601, ENSMUSG00000040549, ENSMUSG00000005871, ENSMUSG00000026825, ENSMUSG00000063077, ENSMUSG00000026131	2.45937	2.75626	0.0275626
GOTERM_CC_5	GO:0031410~cytoplasmic vesicle	17	0.00279737	ENSMUSG00000027419, ENSMUSG00000019302, ENSMUSG00000007891, ENSMUSG00000041268, ENSMUSG00000040990, ENSMUSG00000033981, ENSMUSG00000035086, ENSMUSG00000032076, ENSMUSG00000077450, ENSMUSG00000032181, ENSMUSG00000009394, ENSMUSG00000021687, ENSMUSG00000021314, ENSMUSG00000020048, ENSMUSG00000027248, ENSMUSG00000063077, ENSMUSG00000026131	2.31474	3.4799	0.034799
GOTERM_CC_5	GO:0044459~plasma membrane part	38	0.00333909	ENSMUSG00000031442, ENSMUSG00000034799, ENSMUSG00000001986, ENSMUSG00000007617, ENSMUSG00000041670, ENSMUSG00000043940, ENSMUSG00000041444, ENSMUSG00000041268, ENSMUSG00000025892, ENSMUSG00000002985, ENSMUSG00000054728, ENSMUSG00000024617, ENSMUSG00000026576, ENSMUSG00000027255, ENSMUSG00000037706, ENSMUSG00000051375, ENSMUSG00000009394, ENSMUSG00000005871, ENSMUSG00000021314, ENSMUSG00000027273,…	1.60959	4.14077	0.0414077
GOTERM_CC_5	GO:0043231~intracellular membrane-bounded organelle	125	0.0034628	ENSMUSG00000004071, ENSMUSG00000043940, ENSMUSG00000032582, ENSMUSG00000041268, ENSMUSG00000027193, ENSMUSG00000030451, ENSMUSG00000007440, ENSMUSG00000027255, ENSMUSG00000009394, ENSMUSG00000038615, ENSMUSG00000021314, ENSMUSG00000021595, ENSMUSG00000073422, ENSMUSG00000042699, ENSMUSG00000040249, ENSMUSG00000022443, ENSMUSG00000020402, ENSMUSG00000022961, ENSMUSG00000035086, ENSMUSG00000025781,…	1.19176	4.29111	0.0429111
GOTERM_CC_5	GO:0044430~cytoskeletal part	22	0.00388988	ENSMUSG00000021693, ENSMUSG00000021870, ENSMUSG00000001525, ENSMUSG00000001986, ENSMUSG00000057335, ENSMUSG00000022443, ENSMUSG00000007617, ENSMUSG00000052572, ENSMUSG00000041444, ENSMUSG00000055407, ENSMUSG00000030102, ENSMUSG00000033981, ENSMUSG00000024991, ENSMUSG00000018707, ENSMUSG00000029465, ENSMUSG00000019370, ENSMUSG00000028832, ENSMUSG00000037601, ENSMUSG00000005871, ENSMUSG00000055254,…	1.96607	4.80842	0.0480842
GOTERM_CC_5	GO:0030424~axon	7	0.00447127	ENSMUSG00000032076, ENSMUSG00000020598, ENSMUSG00000062901, ENSMUSG00000026442, ENSMUSG00000005871, ENSMUSG00000055254, ENSMUSG00000069601	4.52513	5.50852	0.0550852
GOTERM_CC_5	GO:0005802~trans-Golgi network	5	0.00457651	ENSMUSG00000027799, ENSMUSG00000021687, ENSMUSG00000035086, ENSMUSG00000027273, ENSMUSG00000004771	7.3585	5.63474	0.0563474
GOTERM_CC_5	GO:0030529~ribonucleoprotein complex	15	0.00705457	ENSMUSG00000079470, ENSMUSG00000058558, ENSMUSG00000027193, ENSMUSG00000029142, ENSMUSG00000036712, ENSMUSG00000062328, ENSMUSG00000026234, ENSMUSG00000060938, ENSMUSG00000015165, ENSMUSG00000033732, ENSMUSG00000025982, ENSMUSG00000055553, ENSMUSG00000042699, ENSMUSG00000025290, ENSMUSG00000028945	2.24578	8.56232	0.0856232
GOTERM_MF_5	GO:0032559~adenyl ribonucleotide binding	42	4.57996e-06	ENSMUSG00000032294, ENSMUSG00000020333, ENSMUSG00000002102, ENSMUSG00000018474, ENSMUSG00000040907, ENSMUSG00000043535, ENSMUSG00000018707, ENSMUSG00000005534, ENSMUSG00000022884, ENSMUSG00000025422, ENSMUSG00000032604, ENSMUSG00000071369, ENSMUSG00000024617, ENSMUSG00000026034, ENSMUSG00000037601, ENSMUSG00000000787, ENSMUSG00000004865, ENSMUSG00000009394, ENSMUSG00000005045, ENSMUSG00000052293,…	2.05635	0.00499292	4.99292e-05
GOTERM_MF_5	GO:0008066~glutamate receptor activity	5	0.00182612	ENSMUSG00000001986, ENSMUSG00000033981, ENSMUSG00000025892, ENSMUSG00000049583, ENSMUSG00000055553	9.40559	1.97292	0.0197292
GOTERM_MF_5	GO:0016462~pyrophosphatase activity	19	0.0032431	ENSMUSG00000021693, ENSMUSG00000001525, ENSMUSG00000038084, ENSMUSG00000003234, ENSMUSG00000002102, ENSMUSG00000022443, ENSMUSG00000040907, ENSMUSG00000043535, ENSMUSG00000025781, ENSMUSG00000018707, ENSMUSG00000022884, ENSMUSG00000025422, ENSMUSG00000026576, ENSMUSG00000057236, ENSMUSG00000000787, ENSMUSG00000005045, ENSMUSG00000026825, ENSMUSG00000063077, ENSMUSG00000042699	2.12214	3.47937	0.0347937
GOTERM_MF_5	GO:0031267~small GTPase binding	5	0.00899916	ENSMUSG00000035901, ENSMUSG00000041879, ENSMUSG00000041670, ENSMUSG00000041268, ENSMUSG00000024096	6.05784	9.38516	0.0938516

## Sheet: overlap GF-SI and exGF-SI
Category	Term	Count	PValue	Genes	Fold Enrichment	FDR [%]	FDR faction
KEGG_PATHWAY	mmu03040:Spliceosome	50	1.75933e-15	ENSMUSG00000029817, ENSMUSG00000024422, ENSMUSG00000040383, ENSMUSG00000030216, ENSMUSG00000039630, ENSMUSG00000031157, ENSMUSG00000015656, ENSMUSG00000028676, ENSMUSG00000023932, ENSMUSG00000031683, ENSMUSG00000032407, ENSMUSG00000059208, ENSMUSG00000059005, ENSMUSG00000037475, ENSMUSG00000005687, ENSMUSG00000021039, ENSMUSG00000020180, ENSMUSG00000003660, ENSMUSG00000024853, ENSMUSG00000021546,…	3.38262	2.16493e-12	2.16493e-14
KEGG_PATHWAY	mmu04144:Endocytosis	50	4.99718e-07	ENSMUSG00000024589, ENSMUSG00000026718, ENSMUSG00000023353, ENSMUSG00000002957, ENSMUSG00000011877, ENSMUSG00000025793, ENSMUSG00000025949, ENSMUSG00000020375, ENSMUSG00000037098, ENSMUSG00000015656, ENSMUSG00000027575, ENSMUSG00000026860, ENSMUSG00000032870, ENSMUSG00000033916, ENSMUSG00000005533, ENSMUSG00000028488, ENSMUSG00000060279, ENSMUSG00000020817, ENSMUSG00000032216, ENSMUSG00000022841,…	2.07646	0.000609646	6.09646e-06
KEGG_PATHWAY	mmu04120:Ubiquitin mediated proteolysis	36	5.44602e-06	ENSMUSG00000024589, ENSMUSG00000032307, ENSMUSG00000027011, ENSMUSG00000025261, ENSMUSG00000038965, ENSMUSG00000029176, ENSMUSG00000024740, ENSMUSG00000028960, ENSMUSG00000042572, ENSMUSG00000001924, ENSMUSG00000051234, ENSMUSG00000032216, ENSMUSG00000014355, ENSMUSG00000040782, ENSMUSG00000034342, ENSMUSG00000035048, ENSMUSG00000020687, ENSMUSG00000058317, ENSMUSG00000020064, ENSMUSG00000038664,…	2.22059	0.00664386	6.64386e-05
KEGG_PATHWAY	mmu05016:Huntington's disease	44	6.17685e-06	ENSMUSG00000037916, ENSMUSG00000063882, ENSMUSG00000002957, ENSMUSG00000005510, ENSMUSG00000025968, ENSMUSG00000025204, ENSMUSG00000027673, ENSMUSG00000055024, ENSMUSG00000005198, ENSMUSG00000019777, ENSMUSG00000020886, ENSMUSG00000021606, ENSMUSG00000024639, ENSMUSG00000002416, ENSMUSG00000039943, ENSMUSG00000060279, ENSMUSG00000022841, ENSMUSG00000014313, ENSMUSG00000025428, ENSMUSG00000022521,…	2.017	0.00753539	7.53539e-05
KEGG_PATHWAY	mmu04720:Long-term potentiation	23	1.07282e-05	ENSMUSG00000001175, ENSMUSG00000053819, ENSMUSG00000055024, ENSMUSG00000005034, ENSMUSG00000027852, ENSMUSG00000078816, ENSMUSG00000001127, ENSMUSG00000030209, ENSMUSG00000020431, ENSMUSG00000002413, ENSMUSG00000024639, ENSMUSG00000022092, ENSMUSG00000014956, ENSMUSG00000039943, ENSMUSG00000059003, ENSMUSG00000022376, ENSMUSG00000036438, ENSMUSG00000021820, ENSMUSG00000026959, ENSMUSG00000022521,…	2.75635	0.0130875	0.000130875
KEGG_PATHWAY	mmu04070:Phosphatidylinositol signaling system	21	0.000338902	ENSMUSG00000001175, ENSMUSG00000038665, ENSMUSG00000036095, ENSMUSG00000025949, ENSMUSG00000027665, ENSMUSG00000026737, ENSMUSG00000022861, ENSMUSG00000026113, ENSMUSG00000041417, ENSMUSG00000041720, ENSMUSG00000078816, ENSMUSG00000028894, ENSMUSG00000028698, ENSMUSG00000031834, ENSMUSG00000039943, ENSMUSG00000025417, ENSMUSG00000040479, ENSMUSG00000036438, ENSMUSG00000052889, ENSMUSG00000034902,…	2.34889	0.412671	0.00412671
KEGG_PATHWAY	mmu04910:Insulin signaling pathway	30	0.00141208	ENSMUSG00000026254, ENSMUSG00000025855, ENSMUSG00000032601, ENSMUSG00000001127, ENSMUSG00000002413, ENSMUSG00000028698, ENSMUSG00000001729, ENSMUSG00000020612, ENSMUSG00000020516, ENSMUSG00000036438, ENSMUSG00000039844, ENSMUSG00000020532, ENSMUSG00000002496, ENSMUSG00000037643, ENSMUSG00000034342, ENSMUSG00000001175, ENSMUSG00000027665, ENSMUSG00000019699, ENSMUSG00000046709, ENSMUSG00000031295,…	1.82367	1.70915	0.0170915
KEGG_PATHWAY	mmu04010:MAPK signaling pathway	49	0.00162788	ENSMUSG00000024242, ENSMUSG00000027347, ENSMUSG00000018209, ENSMUSG00000040118, ENSMUSG00000020151, ENSMUSG00000015656, ENSMUSG00000029454, ENSMUSG00000002413, ENSMUSG00000001729, ENSMUSG00000003352, ENSMUSG00000004113, ENSMUSG00000017412, ENSMUSG00000025551, ENSMUSG00000033352, ENSMUSG00000052889, ENSMUSG00000054252, ENSMUSG00000005583, ENSMUSG00000025199, ENSMUSG00000017291, ENSMUSG00000022416,…	1.55115	1.96799	0.0196799
KEGG_PATHWAY	mmu04012:ErbB signaling pathway	21	0.00251599	ENSMUSG00000002948, ENSMUSG00000053819, ENSMUSG00000027665, ENSMUSG00000046709, ENSMUSG00000019699, ENSMUSG00000041417, ENSMUSG00000031284, ENSMUSG00000027852, ENSMUSG00000078816, ENSMUSG00000001127, ENSMUSG00000002413, ENSMUSG00000028698, ENSMUSG00000001729, ENSMUSG00000031834, ENSMUSG00000030774, ENSMUSG00000020516, ENSMUSG00000021820, ENSMUSG00000033352, ENSMUSG00000052889, ENSMUSG00000034342,…	2.0249	3.02658	0.0302658
KEGG_PATHWAY	mmu03010:Ribosome	21	0.00333812	ENSMUSG00000032399, ENSMUSG00000058546, ENSMUSG00000008668, ENSMUSG00000025794, ENSMUSG00000071415, ENSMUSG00000037805, ENSMUSG00000061787, ENSMUSG00000030744, ENSMUSG00000046364, ENSMUSG00000028234, ENSMUSG00000059291, ENSMUSG00000008683, ENSMUSG00000019505, ENSMUSG00000073702, ENSMUSG00000045128, ENSMUSG00000018362, ENSMUSG00000040952, ENSMUSG00000022601, ENSMUSG00000058600, ENSMUSG00000049517,…	1.9794	3.99718	0.0399718
KEGG_PATHWAY	mmu04150:mTOR signaling pathway	15	0.00341468	ENSMUSG00000001729, ENSMUSG00000031834, ENSMUSG00000036707, ENSMUSG00000026254, ENSMUSG00000020516, ENSMUSG00000027665, ENSMUSG00000069631, ENSMUSG00000004798, ENSMUSG00000024122, ENSMUSG00000019699, ENSMUSG00000041417, ENSMUSG00000002496, ENSMUSG00000058655, ENSMUSG00000002413, ENSMUSG00000028698	2.33025	4.08711	0.0408711
KEGG_PATHWAY	mmu05010:Alzheimer's disease	35	0.00455771	ENSMUSG00000037916, ENSMUSG00000005510, ENSMUSG00000025968, ENSMUSG00000063882, ENSMUSG00000025204, ENSMUSG00000027673, ENSMUSG00000021606, ENSMUSG00000024639, ENSMUSG00000002416, ENSMUSG00000039943, ENSMUSG00000059003, ENSMUSG00000031668, ENSMUSG00000014313, ENSMUSG00000036438, ENSMUSG00000025428, ENSMUSG00000030884, ENSMUSG00000023089, ENSMUSG00000001175, ENSMUSG00000016427, ENSMUSG00000029467,…	1.61325	5.42059	0.0542059
KEGG_PATHWAY	mmu00190:Oxidative phosphorylation	27	0.00495725	ENSMUSG00000037916, ENSMUSG00000025968, ENSMUSG00000005510, ENSMUSG00000063882, ENSMUSG00000019210, ENSMUSG00000025204, ENSMUSG00000027673, ENSMUSG00000021606, ENSMUSG00000002416, ENSMUSG00000019087, ENSMUSG00000014313, ENSMUSG00000025428, ENSMUSG00000033793, ENSMUSG00000033379, ENSMUSG00000030884, ENSMUSG00000023089, ENSMUSG00000016427, ENSMUSG00000022295, ENSMUSG00000052459, ENSMUSG00000040048,…	1.74231	5.88267	0.0588267
KEGG_PATHWAY	mmu05213:Endometrial cancer	14	0.00656662	ENSMUSG00000006932, ENSMUSG00000048756, ENSMUSG00000027665, ENSMUSG00000019699, ENSMUSG00000041417, ENSMUSG00000027852, ENSMUSG00000001127, ENSMUSG00000002413, ENSMUSG00000028698, ENSMUSG00000001729, ENSMUSG00000031834, ENSMUSG00000063063, ENSMUSG00000024122, ENSMUSG00000020135	2.25855	7.72305	0.0772305
KEGG_PATHWAY	mmu05012:Parkinson's disease	27	0.00676715	ENSMUSG00000037916, ENSMUSG00000025968, ENSMUSG00000005510, ENSMUSG00000063882, ENSMUSG00000038965, ENSMUSG00000028964, ENSMUSG00000025204, ENSMUSG00000027673, ENSMUSG00000001924, ENSMUSG00000021606, ENSMUSG00000002416, ENSMUSG00000019505, ENSMUSG00000014313, ENSMUSG00000025428, ENSMUSG00000030884, ENSMUSG00000027804, ENSMUSG00000023089, ENSMUSG00000016427, ENSMUSG00000021771, ENSMUSG00000063694,…	1.70301	7.95004	0.0795004
KEGG_PATHWAY	mmu05220:Chronic myeloid leukemia	18	0.0068831	ENSMUSG00000009681, ENSMUSG00000030970, ENSMUSG00000004508, ENSMUSG00000027665, ENSMUSG00000019699, ENSMUSG00000019777, ENSMUSG00000041417, ENSMUSG00000031537, ENSMUSG00000027852, ENSMUSG00000001127, ENSMUSG00000002413, ENSMUSG00000028698, ENSMUSG00000001729, ENSMUSG00000043733, ENSMUSG00000031834, ENSMUSG00000007659, ENSMUSG00000025199, ENSMUSG00000034342	1.98684	8.08105	0.0808105
KEGG_PATHWAY	mmu05214:Glioma	16	0.00691996	ENSMUSG00000001729, ENSMUSG00000001175, ENSMUSG00000031834, ENSMUSG00000053819, ENSMUSG00000036438, ENSMUSG00000021820, ENSMUSG00000027665, ENSMUSG00000052889, ENSMUSG00000019699, ENSMUSG00000041417, ENSMUSG00000027852, ENSMUSG00000078816, ENSMUSG00000001127, ENSMUSG00000002413, ENSMUSG00000057897, ENSMUSG00000028698, ENSMUSG00000005533	2.09722	8.12266	0.0812266
KEGG_PATHWAY	mmu00020:Citrate cycle (TCA cycle)	10	0.00812992	ENSMUSG00000022477, ENSMUSG00000020321, ENSMUSG00000021913, ENSMUSG00000052738, ENSMUSG00000061838, ENSMUSG00000020664, ENSMUSG00000031299, ENSMUSG00000020917, ENSMUSG00000022110, ENSMUSG00000027406	2.70609	9.47906	0.0947906
KEGG_PATHWAY	mmu05215:Prostate cancer	20	0.00847633	ENSMUSG00000025958, ENSMUSG00000006932, ENSMUSG00000027665, ENSMUSG00000030849, ENSMUSG00000019699, ENSMUSG00000055024, ENSMUSG00000041417, ENSMUSG00000031537, ENSMUSG00000027852, ENSMUSG00000001127, ENSMUSG00000023944, ENSMUSG00000002413, ENSMUSG00000005533, ENSMUSG00000028698, ENSMUSG00000001729, ENSMUSG00000031834, ENSMUSG00000022521, ENSMUSG00000024122, ENSMUSG00000025199, ENSMUSG00000042406	1.8642	9.864	0.09864
GOTERM_BP_5	GO:0044267~cellular protein metabolic process	420	6.94897e-30	ENSMUSG00000026254, ENSMUSG00000025794, ENSMUSG00000019777, ENSMUSG00000028700, ENSMUSG00000025103, ENSMUSG00000019977, ENSMUSG00000046947, ENSMUSG00000025613, ENSMUSG00000022263, ENSMUSG00000020124, ENSMUSG00000021116, ENSMUSG00000028309, ENSMUSG00000020115, ENSMUSG00000020114, ENSMUSG00000037805, ENSMUSG00000027642, ENSMUSG00000038429, ENSMUSG00000006456, ENSMUSG00000019969, ENSMUSG00000027304,…	1.63911	1.17133e-26	1.17133e-28
GOTERM_BP_5	GO:0006464~protein modification process	256	5.12021e-18	ENSMUSG00000019777, ENSMUSG00000028700, ENSMUSG00000001127, ENSMUSG00000051234, ENSMUSG00000024639, ENSMUSG00000030397, ENSMUSG00000046947, ENSMUSG00000022263, ENSMUSG00000049225, ENSMUSG00000021116, ENSMUSG00000024789, ENSMUSG00000020115, ENSMUSG00000020114, ENSMUSG00000027642, ENSMUSG00000030122, ENSMUSG00000022771, ENSMUSG00000021279, ENSMUSG00000006456, ENSMUSG00000062234, ENSMUSG00000019969,…	1.65562	8.63072e-15	8.63072e-17
GOTERM_BP_5	GO:0008380~RNA splicing	69	8.4523e-16	ENSMUSG00000029817, ENSMUSG00000024268, ENSMUSG00000030216, ENSMUSG00000040383, ENSMUSG00000031311, ENSMUSG00000021413, ENSMUSG00000032580, ENSMUSG00000028809, ENSMUSG00000028676, ENSMUSG00000027014, ENSMUSG00000031683, ENSMUSG00000023932, ENSMUSG00000062604, ENSMUSG00000060098, ENSMUSG00000059208, ENSMUSG00000059005, ENSMUSG00000016018, ENSMUSG00000005687, ENSMUSG00000027763, ENSMUSG00000021039,…	2.79733	1.4988e-12	1.4988e-14
GOTERM_BP_5	GO:0006397~mRNA processing	80	6.09884e-15	ENSMUSG00000029817, ENSMUSG00000024268, ENSMUSG00000030216, ENSMUSG00000040383, ENSMUSG00000031311, ENSMUSG00000032580, ENSMUSG00000021413, ENSMUSG00000028809, ENSMUSG00000028676, ENSMUSG00000027014, ENSMUSG00000031683, ENSMUSG00000023932, ENSMUSG00000062604, ENSMUSG00000060098, ENSMUSG00000059208, ENSMUSG00000059005, ENSMUSG00000016018, ENSMUSG00000005687, ENSMUSG00000038611, ENSMUSG00000027763,…	2.48816	1.02918e-11	1.02918e-13
GOTERM_BP_5	GO:0016071~mRNA metabolic process	86	4.55218e-14	ENSMUSG00000029817, ENSMUSG00000024268, ENSMUSG00000030216, ENSMUSG00000040383, ENSMUSG00000031311, ENSMUSG00000032580, ENSMUSG00000021413, ENSMUSG00000028809, ENSMUSG00000028675, ENSMUSG00000028676, ENSMUSG00000027014, ENSMUSG00000031683, ENSMUSG00000023932, ENSMUSG00000062604, ENSMUSG00000060098, ENSMUSG00000059208, ENSMUSG00000059005, ENSMUSG00000016018, ENSMUSG00000005687, ENSMUSG00000038611,…	2.3205	7.67275e-11	7.67275e-13
GOTERM_BP_5	GO:0016568~chromatin modification	72	1.66721e-13	ENSMUSG00000053754, ENSMUSG00000049327, ENSMUSG00000042207, ENSMUSG00000015697, ENSMUSG00000018476, ENSMUSG00000019777, ENSMUSG00000018501, ENSMUSG00000024019, ENSMUSG00000040481, ENSMUSG00000060098, ENSMUSG00000038331, ENSMUSG00000031314, ENSMUSG00000032481, ENSMUSG00000031353, ENSMUSG00000034245, ENSMUSG00000032187, ENSMUSG00000039473, ENSMUSG00000062270, ENSMUSG00000028309, ENSMUSG00000038909,…	2.48606	2.81086e-10	2.81086e-12
GOTERM_BP_5	GO:0016070~RNA metabolic process	145	1.20749e-12	ENSMUSG00000029817, ENSMUSG00000002658, ENSMUSG00000024268, ENSMUSG00000032580, ENSMUSG00000031311, ENSMUSG00000053286, ENSMUSG00000029439, ENSMUSG00000031314, ENSMUSG00000038611, ENSMUSG00000027763, ENSMUSG00000036698, ENSMUSG00000006651, ENSMUSG00000037805, ENSMUSG00000002524, ENSMUSG00000022774, ENSMUSG00000038374, ENSMUSG00000021639, ENSMUSG00000028233, ENSMUSG00000068882, ENSMUSG00000028639,…	1.78484	2.03535e-09	2.03535e-11
GOTERM_BP_5	GO:0015031~protein transport	142	2.96347e-12	ENSMUSG00000078974, ENSMUSG00000000131, ENSMUSG00000020128, ENSMUSG00000025793, ENSMUSG00000069631, ENSMUSG00000020375, ENSMUSG00000039367, ENSMUSG00000036435, ENSMUSG00000042590, ENSMUSG00000021929, ENSMUSG00000028649, ENSMUSG00000021824, ENSMUSG00000022841, ENSMUSG00000061244, ENSMUSG00000032042, ENSMUSG00000000743, ENSMUSG00000020671, ENSMUSG00000019971, ENSMUSG00000020986, ENSMUSG00000051984,…	1.77745	4.99536e-09	4.99536e-11
GOTERM_BP_5	GO:0006886~intracellular protein transport	75	2.70245e-11	ENSMUSG00000000131, ENSMUSG00000078974, ENSMUSG00000025793, ENSMUSG00000069631, ENSMUSG00000042590, ENSMUSG00000031012, ENSMUSG00000039367, ENSMUSG00000028649, ENSMUSG00000021929, ENSMUSG00000021824, ENSMUSG00000067150, ENSMUSG00000022841, ENSMUSG00000032042, ENSMUSG00000002496, ENSMUSG00000020671, ENSMUSG00000031922, ENSMUSG00000009090, ENSMUSG00000020986, ENSMUSG00000021139, ENSMUSG00000035152,…	2.21433	4.5553e-08	4.5553e-10
GOTERM_BP_5	GO:0006396~RNA processing	103	4.3558e-11	ENSMUSG00000029817, ENSMUSG00000024268, ENSMUSG00000031311, ENSMUSG00000032580, ENSMUSG00000053286, ENSMUSG00000029439, ENSMUSG00000038611, ENSMUSG00000027763, ENSMUSG00000036698, ENSMUSG00000006651, ENSMUSG00000002524, ENSMUSG00000037805, ENSMUSG00000022774, ENSMUSG00000038374, ENSMUSG00000068882, ENSMUSG00000028639, ENSMUSG00000028233, ENSMUSG00000024604, ENSMUSG00000029227, ENSMUSG00000021500,…	1.92064	7.34222e-08	7.34222e-10
GOTERM_BP_5	GO:0016310~phosphorylation	148	8.43513e-11	ENSMUSG00000024563, ENSMUSG00000025968, ENSMUSG00000024969, ENSMUSG00000025060, ENSMUSG00000025204, ENSMUSG00000059146, ENSMUSG00000069631, ENSMUSG00000029516, ENSMUSG00000001127, ENSMUSG00000030397, ENSMUSG00000026437, ENSMUSG00000046947, ENSMUSG00000021820, ENSMUSG00000033379, ENSMUSG00000052155, ENSMUSG00000025199, ENSMUSG00000022263, ENSMUSG00000021116, ENSMUSG00000053819, ENSMUSG00000052459,…	1.67968	1.42184e-07	1.42184e-09
GOTERM_BP_5	GO:0051056~regulation of small GTPase mediated signal transduction	61	4.49947e-09	ENSMUSG00000023353, ENSMUSG00000027347, ENSMUSG00000042203, ENSMUSG00000018001, ENSMUSG00000021662, ENSMUSG00000027652, ENSMUSG00000032870, ENSMUSG00000026883, ENSMUSG00000026159, ENSMUSG00000039844, ENSMUSG00000037999, ENSMUSG00000026155, ENSMUSG00000002496, ENSMUSG00000022263, ENSMUSG00000035437, ENSMUSG00000025656, ENSMUSG00000029602, ENSMUSG00000039713, ENSMUSG00000031453, ENSMUSG00000031511,…	2.18014	7.58439e-06	7.58439e-08
GOTERM_BP_5	GO:0030163~protein catabolic process	115	1.19025e-08	ENSMUSG00000032307, ENSMUSG00000029176, ENSMUSG00000023977, ENSMUSG00000025103, ENSMUSG00000051234, ENSMUSG00000032905, ENSMUSG00000041773, ENSMUSG00000031066, ENSMUSG00000032301, ENSMUSG00000020124, ENSMUSG00000028309, ENSMUSG00000021301, ENSMUSG00000020114, ENSMUSG00000025217, ENSMUSG00000038429, ENSMUSG00000027598, ENSMUSG00000079557, ENSMUSG00000019969, ENSMUSG00000024817, ENSMUSG00000064145,…	1.68544	2.0063e-05	2.0063e-07
GOTERM_BP_5	GO:0006412~translation	75	2.8461e-08	ENSMUSG00000032399, ENSMUSG00000026254, ENSMUSG00000030738, ENSMUSG00000018858, ENSMUSG00000025794, ENSMUSG00000031167, ENSMUSG00000067194, ENSMUSG00000071415, ENSMUSG00000028292, ENSMUSG00000005610, ENSMUSG00000059291, ENSMUSG00000019977, ENSMUSG00000068739, ENSMUSG00000029066, ENSMUSG00000022601, ENSMUSG00000030068, ENSMUSG00000035150, ENSMUSG00000021116, ENSMUSG00000058546, ENSMUSG00000003235,…	1.91585	4.79744e-05	4.79744e-07
GOTERM_BP_5	GO:0044257~cellular protein catabolic process	110	4.42163e-08	ENSMUSG00000032307, ENSMUSG00000029176, ENSMUSG00000023977, ENSMUSG00000025103, ENSMUSG00000051234, ENSMUSG00000032905, ENSMUSG00000041773, ENSMUSG00000031066, ENSMUSG00000032301, ENSMUSG00000020124, ENSMUSG00000028309, ENSMUSG00000021301, ENSMUSG00000020114, ENSMUSG00000038429, ENSMUSG00000027598, ENSMUSG00000079557, ENSMUSG00000019969, ENSMUSG00000024817, ENSMUSG00000064145, ENSMUSG00000020802,…	1.6692	7.45318e-05	7.45318e-07
GOTERM_BP_5	GO:0043632~modification-dependent macromolecule catabolic process	105	5.75306e-08	ENSMUSG00000032307, ENSMUSG00000029176, ENSMUSG00000023977, ENSMUSG00000025103, ENSMUSG00000051234, ENSMUSG00000032905, ENSMUSG00000041773, ENSMUSG00000031066, ENSMUSG00000032301, ENSMUSG00000020124, ENSMUSG00000028309, ENSMUSG00000021301, ENSMUSG00000020114, ENSMUSG00000038429, ENSMUSG00000027598, ENSMUSG00000079557, ENSMUSG00000024817, ENSMUSG00000064145, ENSMUSG00000020802, ENSMUSG00000032030,…	1.68429	9.69746e-05	9.69746e-07
GOTERM_BP_5	GO:0007268~synaptic transmission	47	4.9777e-07	ENSMUSG00000022568, ENSMUSG00000034593, ENSMUSG00000028964, ENSMUSG00000046159, ENSMUSG00000026986, ENSMUSG00000024261, ENSMUSG00000021557, ENSMUSG00000026103, ENSMUSG00000022594, ENSMUSG00000017740, ENSMUSG00000004113, ENSMUSG00000056755, ENSMUSG00000020436, ENSMUSG00000017412, ENSMUSG00000059003, ENSMUSG00000033615, ENSMUSG00000002341, ENSMUSG00000000416, ENSMUSG00000063063, ENSMUSG00000003279,…	2.15163	0.000839047	8.39047e-06
GOTERM_BP_5	GO:0006897~endocytosis	48	1.05268e-06	ENSMUSG00000022568, ENSMUSG00000002957, ENSMUSG00000019796, ENSMUSG00000040276, ENSMUSG00000039361, ENSMUSG00000020476, ENSMUSG00000021686, ENSMUSG00000020375, ENSMUSG00000049252, ENSMUSG00000020886, ENSMUSG00000026867, ENSMUSG00000024924, ENSMUSG00000066151, ENSMUSG00000028488, ENSMUSG00000027253, ENSMUSG00000017670, ENSMUSG00000006276, ENSMUSG00000060279, ENSMUSG00000020817, ENSMUSG00000035392,…	2.08053	0.00177441	1.77441e-05
GOTERM_BP_5	GO:0006417~regulation of translation	31	1.81572e-06	ENSMUSG00000026254, ENSMUSG00000025571, ENSMUSG00000037058, ENSMUSG00000005610, ENSMUSG00000009549, ENSMUSG00000001729, ENSMUSG00000052707, ENSMUSG00000020459, ENSMUSG00000028760, ENSMUSG00000031668, ENSMUSG00000039782, ENSMUSG00000028580, ENSMUSG00000020594, ENSMUSG00000024483, ENSMUSG00000030068, ENSMUSG00000021116, ENSMUSG00000027810, ENSMUSG00000036698, ENSMUSG00000022892, ENSMUSG00000071337,…	2.52611	0.00306056	3.06056e-05
GOTERM_BP_5	GO:0006457~protein folding	36	2.34323e-06	ENSMUSG00000019428, ENSMUSG00000071866, ENSMUSG00000021037, ENSMUSG00000003226, ENSMUSG00000052033, ENSMUSG00000030007, ENSMUSG00000036052, ENSMUSG00000032525, ENSMUSG00000028960, ENSMUSG00000037072, ENSMUSG00000015656, ENSMUSG00000056629, ENSMUSG00000073676, ENSMUSG00000001289, ENSMUSG00000066151, ENSMUSG00000028410, ENSMUSG00000034024, ENSMUSG00000019802, ENSMUSG00000025613, ENSMUSG00000025757,…	2.30988	0.00394972	3.94972e-05
GOTERM_BP_5	GO:0006913~nucleocytoplasmic transport	28	2.18225e-05	ENSMUSG00000017801, ENSMUSG00000000131, ENSMUSG00000069631, ENSMUSG00000001440, ENSMUSG00000042590, ENSMUSG00000028676, ENSMUSG00000021929, ENSMUSG00000027787, ENSMUSG00000067150, ENSMUSG00000018362, ENSMUSG00000020315, ENSMUSG00000002496, ENSMUSG00000031922, ENSMUSG00000027782, ENSMUSG00000024789, ENSMUSG00000022774, ENSMUSG00000009470, ENSMUSG00000003731, ENSMUSG00000068742, ENSMUSG00000010097,…	2.37672	0.036778	0.00036778
GOTERM_BP_5	GO:0043623~cellular protein complex assembly	30	2.87227e-05	ENSMUSG00000026276, ENSMUSG00000039361, ENSMUSG00000043866, ENSMUSG00000000131, ENSMUSG00000001440, ENSMUSG00000042590, ENSMUSG00000023004, ENSMUSG00000045136, ENSMUSG00000033066, ENSMUSG00000027253, ENSMUSG00000021573, ENSMUSG00000000416, ENSMUSG00000026202, ENSMUSG00000059456, ENSMUSG00000068206, ENSMUSG00000072235, ENSMUSG00000015733, ENSMUSG00000024271, ENSMUSG00000024456, ENSMUSG00000009470,…	2.26354	0.0484045	0.000484045
GOTERM_BP_5	GO:0051169~nuclear transport	28	3.26833e-05	ENSMUSG00000017801, ENSMUSG00000000131, ENSMUSG00000069631, ENSMUSG00000001440, ENSMUSG00000042590, ENSMUSG00000028676, ENSMUSG00000021929, ENSMUSG00000027787, ENSMUSG00000067150, ENSMUSG00000018362, ENSMUSG00000020315, ENSMUSG00000002496, ENSMUSG00000031922, ENSMUSG00000027782, ENSMUSG00000024789, ENSMUSG00000022774, ENSMUSG00000009470, ENSMUSG00000003731, ENSMUSG00000068742, ENSMUSG00000010097,…	2.32821	0.0550772	0.000550772
GOTERM_BP_5	GO:0051246~regulation of protein metabolic process	70	4.03459e-05	ENSMUSG00000032307, ENSMUSG00000027011, ENSMUSG00000025855, ENSMUSG00000038965, ENSMUSG00000026254, ENSMUSG00000032601, ENSMUSG00000018501, ENSMUSG00000037058, ENSMUSG00000005610, ENSMUSG00000052707, ENSMUSG00000032216, ENSMUSG00000059003, ENSMUSG00000016481, ENSMUSG00000052155, ENSMUSG00000039782, ENSMUSG00000026365, ENSMUSG00000028580, ENSMUSG00000030068, ENSMUSG00000032740, ENSMUSG00000021116,…	1.6251	0.067986	0.00067986
GOTERM_BP_5	GO:0006605~protein targeting	34	4.82178e-05	ENSMUSG00000078974, ENSMUSG00000000131, ENSMUSG00000021709, ENSMUSG00000021686, ENSMUSG00000069631, ENSMUSG00000001440, ENSMUSG00000042590, ENSMUSG00000079108, ENSMUSG00000009549, ENSMUSG00000021929, ENSMUSG00000028649, ENSMUSG00000067150, ENSMUSG00000032042, ENSMUSG00000018362, ENSMUSG00000020315, ENSMUSG00000002496, ENSMUSG00000027782, ENSMUSG00000031922, ENSMUSG00000022415, ENSMUSG00000021139,…	2.08314	0.0812458	0.000812458
GOTERM_BP_5	GO:0022008~neurogenesis	97	7.45165e-05	ENSMUSG00000071866, ENSMUSG00000059146, ENSMUSG00000029516, ENSMUSG00000019777, ENSMUSG00000033066, ENSMUSG00000024639, ENSMUSG00000036766, ENSMUSG00000019971, ENSMUSG00000031391, ENSMUSG00000022636, ENSMUSG00000050071, ENSMUSG00000029603, ENSMUSG00000034586, ENSMUSG00000018965, ENSMUSG00000021066, ENSMUSG00000020900, ENSMUSG00000029705, ENSMUSG00000019969, ENSMUSG00000004798, ENSMUSG00000023030,…	1.47193	0.125532	0.00125532
GOTERM_BP_5	GO:0006606~protein import into nucleus	19	7.61173e-05	ENSMUSG00000000131, ENSMUSG00000024789, ENSMUSG00000001440, ENSMUSG00000042590, ENSMUSG00000009470, ENSMUSG00000003731, ENSMUSG00000068742, ENSMUSG00000021929, ENSMUSG00000002319, ENSMUSG00000022905, ENSMUSG00000040029, ENSMUSG00000026020, ENSMUSG00000018362, ENSMUSG00000020315, ENSMUSG00000002496, ENSMUSG00000027782, ENSMUSG00000066232, ENSMUSG00000031922, ENSMUSG00000020290	2.76475	0.128227	0.00128227
GOTERM_BP_5	GO:0007420~brain development	59	8.13561e-05	ENSMUSG00000029478, ENSMUSG00000019874, ENSMUSG00000069171, ENSMUSG00000021557, ENSMUSG00000019777, ENSMUSG00000018501, ENSMUSG00000017485, ENSMUSG00000052516, ENSMUSG00000040481, ENSMUSG00000024639, ENSMUSG00000000416, ENSMUSG00000048799, ENSMUSG00000032187, ENSMUSG00000019971, ENSMUSG00000006932, ENSMUSG00000015733, ENSMUSG00000006651, ENSMUSG00000020486, ENSMUSG00000004892, ENSMUSG00000001270,…	1.66936	0.137047	0.00137047
GOTERM_BP_5	GO:0010608~posttranscriptional regulation of gene expression	36	8.34706e-05	ENSMUSG00000001424, ENSMUSG00000026254, ENSMUSG00000031167, ENSMUSG00000025571, ENSMUSG00000037058, ENSMUSG00000005610, ENSMUSG00000009549, ENSMUSG00000001729, ENSMUSG00000052707, ENSMUSG00000020459, ENSMUSG00000028760, ENSMUSG00000000568, ENSMUSG00000031668, ENSMUSG00000039782, ENSMUSG00000028580, ENSMUSG00000020594, ENSMUSG00000024483, ENSMUSG00000030068, ENSMUSG00000021116, ENSMUSG00000027810,…	1.98213	0.140607	0.00140607
GOTERM_BP_5	GO:0031175~neuron projection development	47	0.00014032	ENSMUSG00000015222, ENSMUSG00000079499, ENSMUSG00000029516, ENSMUSG00000021662, ENSMUSG00000017485, ENSMUSG00000052516, ENSMUSG00000025085, ENSMUSG00000033066, ENSMUSG00000043733, ENSMUSG00000022995, ENSMUSG00000028289, ENSMUSG00000052727, ENSMUSG00000063063, ENSMUSG00000022601, ENSMUSG00000033004, ENSMUSG00000063160, ENSMUSG00000049556, ENSMUSG00000031391, ENSMUSG00000022636, ENSMUSG00000033577,…	1.75684	0.236262	0.00236262
GOTERM_BP_5	GO:0009966~regulation of signal transduction	113	0.000183826	ENSMUSG00000019428, ENSMUSG00000019775, ENSMUSG00000027652, ENSMUSG00000018501, ENSMUSG00000027253, ENSMUSG00000039844, ENSMUSG00000052155, ENSMUSG00000025199, ENSMUSG00000025485, ENSMUSG00000022263, ENSMUSG00000035437, ENSMUSG00000031391, ENSMUSG00000029602, ENSMUSG00000031453, ENSMUSG00000031511, ENSMUSG00000024789, ENSMUSG00000032570, ENSMUSG00000025217, ENSMUSG00000030849, ENSMUSG00000062232,…	1.39305	0.309409	0.00309409
GOTERM_BP_5	GO:0007611~learning or memory	24	0.000344013	ENSMUSG00000022489, ENSMUSG00000020716, ENSMUSG00000079487, ENSMUSG00000025855, ENSMUSG00000022892, ENSMUSG00000029838, ENSMUSG00000055078, ENSMUSG00000026782, ENSMUSG00000027852, ENSMUSG00000038418, ENSMUSG00000078816, ENSMUSG00000021670, ENSMUSG00000030209, ENSMUSG00000020431, ENSMUSG00000056755, ENSMUSG00000022376, ENSMUSG00000059003, ENSMUSG00000028657, ENSMUSG00000019969, ENSMUSG00000026959,…	2.19741	0.578296	0.00578296
GOTERM_BP_5	GO:0033365~protein localization in organelle	25	0.000517606	ENSMUSG00000000131, ENSMUSG00000024789, ENSMUSG00000025235, ENSMUSG00000001440, ENSMUSG00000042590, ENSMUSG00000009470, ENSMUSG00000003731, ENSMUSG00000079108, ENSMUSG00000068742, ENSMUSG00000009549, ENSMUSG00000021929, ENSMUSG00000022905, ENSMUSG00000028649, ENSMUSG00000002319, ENSMUSG00000014504, ENSMUSG00000040029, ENSMUSG00000026020, ENSMUSG00000018362, ENSMUSG00000032042, ENSMUSG00000020315,…	2.10019	0.868916	0.00868916
GOTERM_BP_5	GO:0007417~central nervous system development	68	0.00056856	ENSMUSG00000029478, ENSMUSG00000019874, ENSMUSG00000069171, ENSMUSG00000021662, ENSMUSG00000021557, ENSMUSG00000019777, ENSMUSG00000018501, ENSMUSG00000017485, ENSMUSG00000052516, ENSMUSG00000024639, ENSMUSG00000040481, ENSMUSG00000000416, ENSMUSG00000048799, ENSMUSG00000032187, ENSMUSG00000019971, ENSMUSG00000006932, ENSMUSG00000003235, ENSMUSG00000015733, ENSMUSG00000006651, ENSMUSG00000020486,…	1.50166	0.954067	0.00954067
GOTERM_BP_5	GO:0043087~regulation of GTPase activity	24	0.00067521	ENSMUSG00000052302, ENSMUSG00000023353, ENSMUSG00000022568, ENSMUSG00000020716, ENSMUSG00000042203, ENSMUSG00000011877, ENSMUSG00000038665, ENSMUSG00000027575, ENSMUSG00000032870, ENSMUSG00000038351, ENSMUSG00000036644, ENSMUSG00000026159, ENSMUSG00000032356, ENSMUSG00000022377, ENSMUSG00000037999, ENSMUSG00000026155, ENSMUSG00000026024, ENSMUSG00000002496, ENSMUSG00000026721, ENSMUSG00000035437,…	2.1029	1.13207	0.0113207
GOTERM_BP_5	GO:0032268~regulation of cellular protein metabolic process	54	0.000776882	ENSMUSG00000026254, ENSMUSG00000025855, ENSMUSG00000032601, ENSMUSG00000018501, ENSMUSG00000037058, ENSMUSG00000005610, ENSMUSG00000052707, ENSMUSG00000016481, ENSMUSG00000052155, ENSMUSG00000039782, ENSMUSG00000028580, ENSMUSG00000030068, ENSMUSG00000032740, ENSMUSG00000021116, ENSMUSG00000060216, ENSMUSG00000036698, ENSMUSG00000024789, ENSMUSG00000006651, ENSMUSG00000003235, ENSMUSG00000022204,…	1.57154	1.30149	0.0130149
GOTERM_BP_5	GO:0048699~generation of neurons	86	0.0008094	ENSMUSG00000071866, ENSMUSG00000069171, ENSMUSG00000029516, ENSMUSG00000059146, ENSMUSG00000021662, ENSMUSG00000021557, ENSMUSG00000019777, ENSMUSG00000017485, ENSMUSG00000052516, ENSMUSG00000033066, ENSMUSG00000024639, ENSMUSG00000043733, ENSMUSG00000022995, ENSMUSG00000028289, ENSMUSG00000038331, ENSMUSG00000000416, ENSMUSG00000022601, ENSMUSG00000031391, ENSMUSG00000019971, ENSMUSG00000022636,…	1.41004	1.35562	0.0135562
GOTERM_BP_5	GO:0009144~purine nucleoside triphosphate metabolic process	26	0.000856252	ENSMUSG00000025968, ENSMUSG00000060671, ENSMUSG00000019210, ENSMUSG00000037685, ENSMUSG00000024566, ENSMUSG00000019943, ENSMUSG00000019087, ENSMUSG00000032087, ENSMUSG00000025428, ENSMUSG00000039058, ENSMUSG00000033793, ENSMUSG00000033379, ENSMUSG00000029467, ENSMUSG00000022295, ENSMUSG00000033161, ENSMUSG00000052459, ENSMUSG00000032570, ENSMUSG00000027546, ENSMUSG00000034566, ENSMUSG00000037400,…	1.99875	1.43356	0.0143356
GOTERM_BP_5	GO:0030900~forebrain development	36	0.000952286	ENSMUSG00000029478, ENSMUSG00000019874, ENSMUSG00000069171, ENSMUSG00000019777, ENSMUSG00000017485, ENSMUSG00000018501, ENSMUSG00000024639, ENSMUSG00000028519, ENSMUSG00000054252, ENSMUSG00000048799, ENSMUSG00000063160, ENSMUSG00000032187, ENSMUSG00000005089, ENSMUSG00000006932, ENSMUSG00000025958, ENSMUSG00000020716, ENSMUSG00000022892, ENSMUSG00000021224, ENSMUSG00000006651, ENSMUSG00000025235,…	1.75661	1.59313	0.0159313
[truncated: 131 more rows]

## Sheet: GF-SI only
Category	Term	Count	PValue	Genes	Fold Enrichment	FDR [%]	FDR faction
[truncated: 72 more rows]

## Sheet: exGF-SI only
Category	Term	Count	PValue	Genes	Fold Enrichment	FDR [%]	FDR faction
[truncated: 53 more rows]
