# Supplementary material for: Social interaction-induced activation of RNA splicing in the amygdala of microbiome-deficient mice
Source: eLife. 2018 May 29;7:e33070. doi: 10.7554/eLife.33070 (PMC5995540; doi:10.7554/eLife.33070)
Supplement: Supplementary file 6. [file elife-33070-supp6.xlsx]

## Sheet: KEGG
KEGG pathway	CON-SI	GF-SI	exGF-SI
Spliceosome	0	14.5566	15.3707
Ubiquitin mediated proteolysis	0	5.82006	10.591
Long-term potentiation	1.7774	7.21358	7.22104
Huntington's disease	0	5.95548	7.10123
MAPK signaling pathway	0	3.53592	5.96142
Endocytosis	0	10.1829	4.88241
Alzheimer's disease	0	2.10815	4.00067
Parkinson's disease	0	2.03794	3.8316
Regulation of actin cytoskeleton	0	1.82606	3.77744
Proteasome	0	0	3.5772
mTOR signaling pathway	0	1.72277	3.26995
Renal cell carcinoma	0	3.79616	2.98325
Insulin signaling pathway	0	4.75004	2.96199
Oxidative phosphorylation	0	2.91769	2.80241
Neurotrophin signaling pathway	0	3.26754	2.49057
Ribosome	0	5.53424	2.46743
Citrate cycle (TCA cycle)	0	1.45636	2.46263
Gap junction	0	3.1159	2.45694
Axon guidance	0	1.60274	2.39738
Long-term depression	0	1.45038	2.29745
Wnt signaling pathway	0	1.28338	1.98802
Fc gamma R-mediated phagocytosis	0	2.64196	1.84687
Tight junction	0	1.3507	1.7729
ErbB signaling pathway	0	5.84802	1.66531
SNARE interactions in vesicular transport	0	0	1.65461
RNA degradation	0	0	1.51439
Oocyte meiosis	0	2.85952	1.50445
Lysosome	0	1.57	1.45239
Endometrial cancer	0	3.44615	1.36495
Phosphatidylinositol signaling system	0	4.06799	1.26876
Propanoate metabolism	0	0	1.09434
Glioma	0	5.31964	0
Non-small cell lung cancer	0	4.22611	0
Progesterone-mediated oocyte maturation	0	4.13071	0
Chronic myeloid leukemia	0	3.92671	0
Pancreatic cancer	0	3.51657	0
GnRH signaling pathway	0	3.13087	0
Prostate cancer	0	2.68098	0
Chemokine signaling pathway	0	2.6565	0
Thyroid cancer	0	2.35727	0
Acute myeloid leukemia	0	2.23318	0
Adherens junction	0	1.79723	0
Melanogenesis	0	1.76852	0
Focal adhesion	0	1.67937	0
Amyotrophic lateral sclerosis (ALS)	0	1.40376	0
Glycerolipid metabolism	0	1.26369	0
VEGF signaling pathway	0	1.12163	0
Glycolysis / Gluconeogenesis	0	1.11783	0
Pyruvate metabolism	0	1.10377	0
