# Supplementary material for: Social interaction-induced activation of RNA splicing in the amygdala of microbiome-deficient mice
Source: eLife. 2018 May 29;7:e33070. doi: 10.7554/eLife.33070 (PMC5995540; doi:10.7554/eLife.33070)
Supplement: Supplementary file 7. [file elife-33070-supp7.xlsx]

## Sheet: Correlations_all
Gene Name	Pearson Correlation (Social interaction behaviour vs. gene expression)
Derl2	0.835479
Lancl2	0.827979
Slc39a7	0.818043
Tfpt	0.798108
Copa	0.79549
Ensa	0.78172
Smad1	0.78043
Ccnd2	0.778773
Dcaf8	0.776876
Rgl3	0.775955
Tbcc	0.767819
Gsto2	0.761095
Fam96b	0.748867
Fmo2	0.747917
Mtmr4	0.743633
Mpzl2	0.743233
Lss	0.737738
Ackr1	0.72799
Pla2g4e	0.725293
Hey2	0.720397
Robo2	0.719288
Ssna1	0.719224
Tmed9	0.717126
Rab8a	0.714534
Pdlim3	0.711817
Ppat	0.703638
Papd5	0.702684
Dnajb4	0.699696
Copz2	0.697034
Col6a2	0.695131
Cirbp	0.695034	significantly different in high vs low performing mice
Pex6	0.691284
Riok1	0.688181
Tnik	0.687413
Trim3	0.687289
Prkrip1	0.685145
Gga2	0.682316
Ntsr1	0.682001
Ctsf	0.679713
Ctu1	0.675797
Cnih4	0.675537
Pgbd1	0.672886
Clec10a	0.671697
Gm16323	0.669695
Rnasek	0.668256
Fcf1	0.667605
Zbtb8b	0.662578
Dnajb6	0.662457	significantly different in high vs low performing mice
Tubgcp2	0.661796
Mrpl16	0.660204
Tmem40	0.659225
Aif1	0.657489
Mybpc1	0.657463
Pnrc2	0.656599
Ak6	0.655948
Rnaseh1	0.65538
Atp6v1b2	0.655265
Rgs16	0.654827
Spty2d1	0.654393
Lta4h	0.654173
Atic	0.654007
Gm20712	0.653264
Rbm3	0.649931
Rnf6	0.649593
Pcdhb22	0.64739
Fam160b1	0.647298
D030028A08Rik	0.645202	significantly different in high vs low performing mice
Zfp472	0.644552
Vipr2	0.639428
Trpc6	0.638117
Arf6	0.637562
Sf3b4	0.636117
Fabp3	0.632357
2810403A07Rik	0.631938
Lyrm7	0.631388
Dact1	0.630575
Xrra1	0.63043
Ier3	0.629228
Bfar	0.628763
5730409E04Rik	0.628529
Pcgf3	0.628048
Mtmr6	0.627717
Dbp	0.627638
Msln	0.6272
Hspa1a	0.625574
Alpk1	0.625451
Wdr66	0.625403
Gadd45g	0.624058
Sptbn5	0.623409
Uqcrb	0.622583
Hspbap1	0.618069
Hk1	0.61466
Atg16l2	0.61362
Efnb1	0.613206
Pcdhb20	0.612932
Gm20633	0.611932
Pcdhb16	0.610641
Manf	0.6106
Sec24c	0.610563
Zdhhc22	0.610285
Nit1	0.609155
Mettl3	0.608963
Exosc9	0.608688
Pkd1l3	0.607842
2810408M09Rik	0.607061
Klhdc1	0.603306
Atp5g3	0.603214
Slc26a2	0.603036
Gm527	0.599544
Ptpn18	0.598313
Myh1	0.597828
Nap1l1	0.597746
Rnf207	0.597421
Gclc	0.59695
Tnnt2	0.596848
Herpud1	0.596793
Lmnb2	0.596728
Aim2	0.596223
Dtymk	0.594854
Cmbl	0.59449
Cluap1	0.594171
Dpm2	0.593909
2610001J05Rik	0.593239
B4galt3	0.592245
Gpr88	0.591782
Kifap3	0.591232
Gm16432	0.590228
Inhbb	0.589934
Gm24336	0.589801
Park2	0.589198
Ifit2	0.589022
Timm23	0.588175
Klhdc9	0.587087
Spp1	0.58623
Zfp712	0.58529
Met	0.585207
Cnpy4	0.584491
Tut1	0.583145
Os9	0.583106
Gper1	0.582707
Gnl3	0.582662
Fahd2a	0.582353
Rpgr	0.582352
Scn2a1	0.582244
D630003M21Rik	0.582188
Vars2	0.58163
Nup50	0.581449
Vwa5b1	0.580643
Gm7964	0.580541
Jmjd6	0.580032
2810403D21Rik	0.579943
Sars	0.579452
Gadd45b	0.578506
Piga	0.577132
Vipr1	0.577038
Sae1	0.576875
Wnt5b	0.576369
Pcp4l1	0.576365
Ppil4	0.575175
Plaa	0.574708
5330413P13Rik	0.574615
Trim12c	0.574422
Trmt112	0.573299
Mir143	0.57254
Ptcd1	0.57183
Gm11837	0.570738
Pyroxd2	0.569003
Dpf1	0.568656
Ntn1	0.568372
RP24-114E18.7	0.568304
Armc9	0.56794
Notch3	0.567913
2510002D24Rik	0.567618
Clp1	0.567454
Mien1	0.567257
Prkcsh	0.566837
5930403N24Rik	0.566105
Gsta4	0.565909
Tsr3	0.565833
Crip2	0.565553
Sod1	0.565207
Pmvk	0.565109
BC089491	0.564971
Dhx34	0.56465
Coq7	0.564064
Mtrf1l	0.563385
Zmynd11	0.561893
Wdr61	0.561437
1110012L19Rik	0.5614
Armcx5	0.561195
Dpy19l4	0.561168
Dusp26	0.560316
Shh	0.560281
Hsp90ab1	0.560015
Rnps1	0.558996
Hebp2	0.557679
Alkbh1	0.557622
Psmg1	0.556981
Hes6	0.556721
Thg1l	0.556044
Susd5	0.555247
Slc30a1	0.554599
Tmem181a	0.554375
Cers5	0.554145
Klhdc10	0.553826
Fos	0.55359
Sde2	0.553179
Tmem263	0.552588
Taf11	0.552369
Gm26984	0.55168
Psmb7	0.550964
Nudt8	0.550728
Sec23ip	0.549621
Tmem53	0.548715
Sumo1	0.548649
Cdkn2d	0.548298
Bet1l	0.548256
Trim71	0.548249
Amd-ps3	0.548212
Tbca	0.548175
Fndc3a	0.547799
Usb1	0.547579
Rad54b	0.547238
Atp6ap1l	0.547001
Dpp10	0.546864
Snhg12	0.545631
Polk	0.545553
Gm26793	0.544969
Ero1lb	0.544348
Casp3	0.543972
Obscn	0.54374
Snrpd2	0.543597
Abhd16a	0.543297
Cd3eap	0.542982
Smim19	0.542596
Rprm	0.542576
Prpf4	0.542516
Gm16046	0.542415
Rps6kl1	0.542378
Gpi1	0.542347
Chfr	0.541252
Mxra8	0.541187
Lrrc6	0.54058
D430036J16Rik	0.540527
Ntmt1	0.540125
Oard1	0.540107
Myo1b	0.539891
Ano6	0.539544
Gm10039	0.538696
Igf2r	0.535987
Ier3ip1	0.535496
Nrg2	0.535268
Socs3	0.534092
Taf1a	0.531806
Ofd1	0.531682
Pdrg1	0.530413
Glce	0.530332
Hyal1	0.529753
AA986860	0.529534
Tusc3	0.529096
Hnrnpr	0.528822
Colgalt1	0.528019
2310033P09Rik	0.52781
Ddb2	0.52774
Dars2	0.527162
Gtf2f1	0.527058
Pcdhb9	0.52703
Gcfc2	0.525514
Pelo	0.525401
5430416N02Rik	0.525355
Nme3	0.52487
4921531C22Rik	0.524295
Skap1	0.524257
Col4a4	0.52415
1110004F10Rik	0.524081
Pcdha4	0.524022
Rpl34-ps1	0.521657
Dlk2	0.521617
Eif4ebp1	0.521135
Tead2	0.520951
Stradb	0.519868
Srp14	0.519405
Cadm3	0.519382
Sema3b	0.518864
Rac3	0.518756
Nufip2	0.51865
Dpy30	0.51839
Dnajc3	0.516801
Lsm3	0.516621
Gmpr2	0.516521
Tra2b	0.516278
Csk	0.515984
Wtap	0.515685
Trim32	0.514596
Susd1	0.513921
Cd59a	0.513811
Dek	0.513746
Tsr2	0.51339
Rtn1	0.513066
Hmgn1	0.51253
Stox1	0.512389
Efcab12	0.512322
Gabpa	0.512259
Mettl10	0.511669
Ptk7	0.511014
Cckbr	0.510649
Fxr2	0.510214
Sos2	0.509826
Samd12	0.509546
Micall2	0.5095
Brinp2	0.509129
Klf6	0.5083
Lage3	0.507951
Usp27x	0.507603
Nemf	0.507559
Gnb4	0.506895
Tusc1	0.50686
Kdm8	0.506714
Crtc2	0.506548
Txndc5	0.506473
Snapc3	0.505535
Sec11a	0.504717
Dtl	0.504329
A430106G13Rik	0.504229
Zfp821	0.503974
Zcchc2	0.5037
Lhfp	0.503607
Egfl8	0.5036
Fam98a	0.502871
2010320M18Rik	0.502584
Rtfdc1	0.502274
Itpripl2	0.501525
Dhx57	0.50145
Tsta3	0.501122
Thbs1	0.500881
Nuak1	0.500703
Gm22513	0.500515
Srsf3	0.500414
Tnrc6c	0.49986
Ndufb7	0.499785
Rabl2	0.49977
Wnt4	0.499725
Oxct1	0.499274
Slc2a3	0.499142
Gpr125	0.498591
Nbn	0.49695
Cul4b	0.496576
Ykt6	0.49642
Psmc1	0.49637
Ankef1	0.496287
Ttc9c	0.496262
Cplx3	0.496247
Hinfp	0.496094
Rpl28	0.495785
Cdk2ap2	0.495634
Ngb	0.494942
Peli2	0.494869
Tfr2	0.494813
Dnase2a	0.49443
Creb3l1	0.494058
Trim41	0.49383
Gm10221	0.493402
Gbe1	0.493187
Fam178a	0.493006
Rprl3	0.492887
Hspa5	0.492523
Skiv2l2	0.49199
U2af1	0.491773
Baz1a	0.491545
Zfp131	0.491501
Gnpda1	0.491331
Rxrb	0.491201
Slc39a6	0.490822
Arl13b	0.490645
2410016O06Rik	0.4903
Armcx1	0.489818
St3gal4	0.489746
Knstrn	0.489575
Hlcs	0.489533
Rpa3	0.489465
Wdr74	0.489447
Ruvbl2	0.488846
Rbm24	0.48841
March9	0.488282
Swt1	0.488245
Rai2	0.487233
Ankrd39	0.487201
Zpbp	0.487078
Atp10d	0.486662
Btg2	0.486265
Gm12258	0.48602
Itgam	0.485984
Snhg3	0.484856
Pf4	0.484431
Lamc2	0.484236
1700010I14Rik	0.484019
Klhdc8a	0.483982
Ppil1	0.483981
Limk2	0.483279
Psmd3	0.483195
Gm20716	0.48306
Pus1	0.483
Zbtb7c	0.482943
Banp	0.482773
Ercc1	0.48255
Rasa3	0.48237
Micu1	0.482335
Btg3	0.482184
Elf2	0.481706
Cirh1a	0.481667
Fam192a	0.481496
Kti12	0.481239
Slc3a2	0.480929
Erdr1	0.480445
Amd2	0.480238
Fancg	0.479575
Emc9	0.479499
Tarbp2	0.479212
Acot8	0.478992
Plxnb2	0.478808
Meis2	0.47872
Mcm8	0.47863
Otud4	0.478457
Spint2	0.478194
1700016P03Rik	0.478118
Zfp961	0.47792
Gpn3	0.477668
Trim27	0.477335
Tunar	0.477117
Tmem87a	0.476776
Snrpb2	0.476722
Dhrs4	0.476083
Fam188b2	0.476043
Mfap1b	0.476011
B230307C23Rik	0.475737
Scp2	0.475627
Fzd2	0.475487
Camk4	0.47547
Ctc1	0.475271
Smn1	0.475149
Ppia	0.474946
Pld3	0.474686
Clta	0.473965
Clu	0.473541
Arl4a	0.473188
Nprl2	0.473096
Mynn	0.472961
Kdelc2	0.472927
Nop16	0.472667
Ssc5d	0.472447
Yae1d1	0.472206
Eid2b	0.472052
Pmm1	0.472014
Alms1-ps2	0.471742
Pcgf1	0.471606
Doc2a	0.471489
Ngrn	0.471314
Ruvbl1	0.470934
Arl1	0.47031
Sh3d19	0.47027
Slbp	0.470101
BC023719	0.470026
Plin2	0.469827
Cdc45	0.469812
Hsp90aa1	0.469528
Ngdn	0.469508
Ndufs5	0.469031
Rimklb	0.468972
Pold3	0.468528
Nufip1	0.468245
Akirin1	0.468081
Mettl6	0.467631
Adss	0.467364
Nfkbia	0.467214
Smco4	0.466768
Tcea1	0.466498
Polr2b	0.465753
Dnajb1	0.4657
Pdlim1	0.465515
Vwa3a	0.463899
Optn	0.463782
Ndfip1	0.463601
Tmod3	0.463492
Arid5a	0.463385
Zc3h8	0.463279
Hadh	0.46319
Fbxo2	0.462325
Ccne2	0.46213
Hist2h2aa1	0.462111
Ptger3	0.461862
Gtf2h1	0.461543
Akap8l	0.461403
Get4	0.461368
Atp6v1c2	0.460935
Eif2b2	0.4608
Ccdc61	0.460469
Utp11l	0.459739
Ccdc116	0.459487
Mettl5	0.459467
Romo1	0.458985
Map3k15	0.458891
Isg20l2	0.458876
Zbtb46	0.45817
Hmgb3	0.458058
Dusp12	0.457995
Gm6537	0.457741
Vps37d	0.457688
2610306M01Rik	0.457325
Bbs2	0.457261
Zmpste24	0.457037
Cbfb	0.456479
Gtpbp4	0.456166
Ifrd2	0.455886
Chmp2a	0.455861
Casp1	0.455551
Zfp830	0.455127
Sri	0.454965
Psmg4	0.454914
C3ar1	0.454836
Timp3	0.454807
Stx16	0.454707
Slc7a6	0.454568
Man2b2	0.454458
Pbdc1	0.45436
Dlx1	0.453908
1700021K19Rik	0.453671
Mgat4a	0.453662
Spats1	0.453647
Nifk	0.453548
Foxf2	0.45347
Txnip	0.453298
Rab11fip1	0.452923
Cbx2	0.452673
Leprel2	0.452227
Aaas	0.45214
Naa16	0.451981
Dhx15	0.451931
Fntb	0.451732
Cmtm8	0.451664
Mdfic	0.451366
Zic5	0.450638
Cdv3	0.450565
Col9a2	0.450288
PCDHGA12	0.450262
Zfp82	0.449813
Ppp1r8	0.44961
Crb3	0.449365
Higd1b	0.449346
Mbd4	0.449293
9930104L06Rik	0.449229
Rgs2	0.449197
Slc35b2	0.449188
Zrsr1	0.449138
Hist2h4	0.44897
Llph	0.448531
Hspe1	0.448342
Rnf141	0.447686
Mettl18	0.447483
5830415F09Rik	0.447266
Ttc4	0.446913
Wfs1	0.446771
Poln	0.446562
Dgat2	0.446541
F11r	0.446412
Cldn12	0.446056
Fbxo10	0.445916
Ddx50	0.445848
Ptprk	0.445839
Pa2g4	0.445752
Psg16	0.444641
Ankrd45	0.444485
Cdk5	0.444281
5330417C22Rik	0.444025
Phospho2	0.44389
Acvr1b	0.443624
Hars	0.443505
B4galnt4	0.443085
Nt5dc2	0.443011
Nqo1	0.442812
Atp6v1c1	0.442757
Fam122a	0.442716
S100a10	0.441692
4933434E20Rik	0.44166
Dirc2	0.441363
Ei24	0.441302
Zfp790	0.441291
Aars	0.441213
A930033H14Rik	0.441069
Fxr1	0.44101
Enkd1	0.440898
Spata2l	0.440794
Nupl1	0.440579
Klhdc8b	0.440555
Ilf2	0.440547
Rbbp7	0.440399
Fam189a2	0.440316
Bhlhe41	0.439961
Upk1b	0.439324
Syp	0.43923
Ecm1	0.439064
Qsox1	0.438968
Slc7a1	0.438734
1110038B12Rik	0.438512
Cmas	0.438067
Rnd2	0.437866
Pdia4	0.437457
Ap3m2	0.436972
Mcmdc2	0.436829
Vimp	0.436749
Hprt	0.436139
Brd2	0.436138
Slc7a6os	0.435943
Atp6ap1	0.435498
Lrpap1	0.43538
Gsto1	0.434759
Ace	0.434541
Dok1	0.434148
B230354K17Rik	0.434011
C920021L13Rik	0.433615
Steap4	0.433432
Zfp408	0.433351
Hspa1b	0.433269
Unkl	0.433153
Rrad	0.433143
Tm7sf2	0.433025
Phf8	0.43299
Rbm22	0.432651
Racgap1	0.43257
Wnt5a	0.432432
Ddx19b	0.432207
Ddx17	0.432145
Clns1a	0.432135
Serac1	0.431931
Gm6034	0.431768
Sap30	0.43135
Cldn1	0.431333
Rlf	0.430933
Pdcd5	0.430074
Tap2	0.429791
Car11	0.429552
Dbnl	0.429189
Tekt2	0.429092
Gtf2f2	0.429027
Smarca1	0.428853
Naglu	0.428829
Sync	0.428398
Gm16973	0.428208
Ldha	0.428206
Lamtor4	0.428121
Slc37a4	0.427779
9330182L06Rik	0.427731
Blmh	0.427243
Vps4b	0.427221
Ndufa9	0.427062
PCDHGC5	0.427048
Fkbp3	0.426811
Tnpo3	0.426658
Ctsl	0.426475
Kank4	0.426409
Rpl23	0.426195
P2ry1	0.426132
Ergic3	0.425776
Hspd1	0.425615
RP23-138L21.3	0.425596
B4galt2	0.425192
Snrnp35	0.425171
Otulin	0.424863
AW209491	0.424811
Rbm5	0.4248
Idh2	0.424739
Orc6	0.424562
Rpp25l	0.424437
Fgd6	0.423884
Aacs	0.423671
Psma4	0.423647
Hnrnpf	0.423579
Psme2	0.423434
Ndufaf7	0.422954
Mex3c	0.422622
Map1lc3a	0.422595
Eef2k	0.422501
Stip1	0.422442
Nab2	0.422274
1810011O10Rik	0.422154
Gars	0.421854
Dnaja1	0.421513
2810025M15Rik	0.421322
Dnah7c	0.421126
Bcat2	0.421117
Gm4204	0.420978
Gm21972	0.420929
Lrrc42	0.419977
Fhad1	0.419912
Phf3	0.41991
H2-K1	0.419676
Slc4a10	0.419535
Il17rc	0.419247
Lsm4	0.419119
Zfp354c	0.418907
Pqbp1	0.41788
Mum1l1	0.417639
Usp14	0.417558
Tec	0.417554
Galns	0.416986
Carkd	0.41696
Birc3	0.416947
Aff1	0.416652
Ngfr	0.416493
Ttc26	0.416404
Pxdn	0.416385
Ncstn	0.41634
H2afv	0.416179
WI1-1003N17.1	0.416168
Vgll4	0.416131
Gch1	0.41608
Akt1s1	0.416054
Hif1a	0.416014
Nek10	0.415871
Anp32a	0.415341
Rnf145	0.41511
Gm21596	0.415046
Npas4	0.415017
Colgalt2	0.414585
Nup88	0.414477
Rab2a	0.413977
Ddx27	0.413438
Alg6	0.413407
Akr1c14	0.413101
Prkar2b	0.412918
Atl2	0.412673
Ass1	0.412669
Dnajc25	0.412533
Srsf1	0.412413
Lysmd1	0.412375
Shq1	0.412224
Ptger1	0.41168
Otud1	0.411422
Zbtb11	0.411255
Tnfsf15	0.410982
Med20	0.410919
Zcchc18	0.410881
Hax1	0.410864
Tc2n	0.410583
Chd4	0.410341
Hcrtr1	0.410319
Gpcpd1	0.410044
Inafm1	0.409992
Gm166	0.409975
Aebp1	0.409966
Cyp4x1	0.409684
Mrfap1	0.409318
Gpr12	0.409307
Rbm15	0.409108
Gpr61	0.408937
Endou	0.408845
Cfap52	0.408832
Ubp1	0.408668
Ppp1r11	0.408608
Arpc3	0.408488
Creld2	0.408474
Lonrf3	0.408461
Setdb1	0.408455
Tom1l1	0.408099
Piezo2	0.40776
Disp1	0.407635
Taf9	0.407504
BC004004	0.407414
Abhd11os	0.407365
Prkag2	0.407137
Sp7	0.406438
Cdkn1c	0.40639
Gm4353	0.406362
0610040B10Rik	0.406355
Mavs	0.406278
Atf1	0.406196
Btf3	0.405988
Gbas	0.405857
Map3k6	0.405536
Ptn	0.404669
Bex4	0.404381
Klhl22	0.403869
P4ha1	0.403797
Rnf181	0.403179
Mir154	0.402926
Ccdc106	0.40268
Thap1	0.402648
A830018L16Rik	0.4025
Pcdha7	0.402126
Vcl	0.402052
Dcaf13	0.401993
Nelfcd	0.401787
Fbxl20	0.401741
Zmat2	0.40151
Dcun1d1	0.401469
Gcat	0.401136
RP23-118E21.11	0.401042
Zfp46	0.400546
Slc5a5	0.400395
Ptgr1	0.40039
Prps1	0.400386
Scrn1	0.400037
Vps52	0.399686
Prkci	0.399598
Caprin2	0.399464
Trmt1l	0.399046
Ctdspl	0.399037
Gm16310	0.39899
Nat8	0.398958
Col6a1	0.398911
Rps19-ps3	0.398849
Gm15645	0.398833
Zfp414	0.398456
Dgke	0.398435
Ap2m1	0.398027
Dbndd1	0.397681
Gm12371	0.397674
Man2b1	0.397638
Prpf6	0.397474
Pvrl2	0.397161
Spice1	0.397148
Fads3	0.396804
Psmd14	0.396619
Pip5k1a	0.396501
Fam32a	0.396501
Chd8	0.396431
Ahcy	0.396416
Ewsr1	0.396379
Mrpl22	0.396287
Ubl5	0.396227
4921524J17Rik	0.39611
Eapp	0.395736
Elp2	0.395655
Rad23b	0.395613
Tspan4	0.39559
Rpl36	0.39549
Msx1	0.395461
Sumo3	0.395213
Rab26os	0.39512
Lrrc3b	0.394855
Epn3	0.394833
Ppara	0.39472
Zc3h18	0.394335
Ppox	0.394242
Ctgf	0.394238
Gm16001	0.394088
Fam114a2	0.393965
Etnk1	0.3938
Cwc22	0.393427
Rbks	0.393303
Magoh	0.393281
Vsig10l	0.393159
Scly	0.393078
Rnf2	0.393052
Grb2	0.392345
Mrps6	0.392147
Mettl21a	0.391806
Hspa9	0.391787
Rilpl1	0.391572
Catsper2	0.39141
Prkg1	0.391016
Kcnj4	0.39099
Mmp9	0.390889
Gm28424	0.390878
Plvap	0.39084
Zpr1	0.39078
Trmt6	0.390529
Arid4a	0.390391
B3gnt9	0.390204
Zfp944	0.390162
Ccng2	0.390067
Gm9866	0.389914
Cct8	0.389894
Psma2	0.389833
Gnpnat1	0.389766
Dennd3	0.389752
Gnl1	0.389455
Tmem57	0.389225
Klhdc2	0.389173
Dhx29	0.388925
Dync1li1	0.388892
Dhx32	0.388859
Slc41a3	0.388644
Aamp	0.388551
Aatf	0.388456
1810026J23Rik	0.388418
Mrpl46	0.388174
Shisa2	0.388081
Ift52	0.387628
Ahsa1	0.38757
Cpxm2	0.387564
Gm22710	0.387288
Adrb2	0.387069
Zfp622	0.387036
Efemp2	0.386852
Arl3	0.386579
Pdlim7	0.386571
Zfp467	0.386413
Sike1	0.386367
Hmgcl	0.386102
Dhx8	0.38599
Gprasp1	0.385666
Ppp1r1a	0.385235
Rfx2	0.385148
Ube2g2	0.384665
1700013F07Rik	0.384454
Wdr47	0.384424
AI597479	0.384332
Gsg1l	0.384304
Psmg2	0.384099
Rsrc2	0.384042
Zfp69	0.383925
Mrps25	0.38392
Supt4a	0.383684
Ulk3	0.383644
Nop58	0.38353
Xrcc4	0.383514
Armc8	0.383419
Usp12	0.383345
Aida	0.383139
Ufsp2	0.383083
Nfatc2	0.382965
Zmym1	0.382833
Ankrd63	0.382791
Myh2	0.382534
Gspt2	0.382478
Gm14411	0.382372
Mrc2	0.382282
Anapc7	0.382245
Csnk2a1	0.382184
Tiam2	0.381938
Trip10	0.381858
Uxt	0.3817
Il1rapl2	0.381563
Nmi	0.381448
Napg	0.381013
Rpl23a	0.380874
Psmb10	0.380481
Mut	0.380262
Rcn1	0.380251
Smad3	0.380188
Psmb3	0.379896
Ralb	0.379851
Arntl	0.379633
Slc33a1	0.379462
Irf8	0.379388
Gmip	0.379271
Sgtb	0.379014
Gm24339	0.378345
Sstr2	0.378307
Nans	0.378183
Prdm16	0.377931
Arl6ip5	0.377881
Lactb	0.377819
Ndufa11	0.377593
Tmem165	0.377465
Lamb1	0.377441
Hist2h2bb	0.37737
Coq6	0.377103
Iqcg	0.377055
Fam213b	0.376917
Dsc1	0.376917
Pak1ip1	0.376502
Sema6b	0.376049
Cfap45	0.375874
Odf2	0.375741
Rnf121	0.375634
Enthd2	0.375592
Sfmbt1	0.375566
Gm11744	0.37547
Myo1e	0.375302
Zfp553	0.375156
Bend4	0.374966
Gm15411	0.374617
Tmem14c	0.374453
Pdcl3	0.374366
Mrpl14	0.373995
Angptl7	0.373903
Fbxo22	0.373643
Arhgap19	0.37346
Spin4	0.373396
Dmxl2	0.373246
Adrm1	0.373234
Prlr	0.373096
Ap3b1	0.373015
Kcnn3	0.372976
Uprt	0.372945
Cflar	0.372759
Ythdc1	0.372543
Luc7l	0.372103
Smad2	0.372069
Psma6	0.371829
Tatdn2	0.371786
Ephx1	0.371614
Sox11	0.371583
Agtrap	0.371484
Mfap1a	0.371453
Mmp24	0.371437
Nub1	0.371371
Zfp40	0.371282
D10Wsu102e	0.371196
Cope	0.371103
Cep76	0.371019
Spg11	0.370756
Nhp2	0.370558
Wash	0.370396
Ift81	0.370396
1810024B03Rik	0.370316
Ptprh	0.3702
Aagab	0.370023
Yjefn3	0.369889
Gm4459	0.369864
Tagln2	0.369772
Zfp322a	0.369642
Necab1	0.369457
Slc7a7	0.369224
Spcs2	0.369169
Ogfr	0.369108
Tm2d3	0.36881
Mif	0.368533
Rint1	0.368369
C530050E15Rik	0.368144
Gm28119	0.367998
Edrf1	0.367757
Prpf18	0.367399
Zfyve19	0.367375
Mak16	0.367272
BC005624	0.367268
Hk3	0.367203
Rpl17	0.367108
Vti1b	0.367103
Pim1	0.367103
Tox4	0.366962
Col6a3	0.366955
Hmox2	0.3669
Tchp	0.366849
BC067074	0.366772
Tceal8	0.366733
1700029J07Rik	0.36673
Fabp3-ps1	0.366647
Slco1a4	0.366646
Gm25082	0.366606
Cstf2t	0.366381
Cnnm4	0.366363
Npm1	0.366295
Gm14418	0.36616
Sycp3	0.366028
Zfp597	0.365673
Slc37a3	0.365672
Ccdc176	0.365567
Hint1	0.365459
Eif3e	0.365417
Ing4	0.365368
Ubfd1	0.365335
Nucb2	0.365138
Ccdc57	0.364973
H2afy2	0.364845
Gabarapl1	0.364821
Snrpg	0.364816
Nars	0.364694
Gm9954	0.364648
Tspyl2	0.364507
Casp2	0.364379
Bpgm	0.364368
Map3k2	0.36416
Grpel1	0.364101
Triap1	0.364059
Zwilch	0.364053
Sdr42e1	0.363976
Nol4	0.363927
Ift122	0.363757
Fgf12	0.363416
Syt16	0.363268
Cxadr	0.363238
Ldb1	0.363184
Cutal	0.363047
Fmod	0.362975
Mx2	0.362927
Cyp4x1os	0.362755
Gm23134	0.3623
Mir8091	0.362239
Serpinb1a	0.36217
Ddit3	0.36215
Tcf7	0.362132
Snord104	0.361645
Snrnp40	0.361604
AU040320	0.361581
Ndufs6	0.361423
Cct7	0.361352
Asns	0.361309
Slamf7	0.361224
Ywhae	0.36109
Il34	0.361014
Gm17750	0.360991
Col5a1	0.360896
Xrn2	0.360864
Gm12522	0.360355
Otof	0.360323
Lgr5	0.360261
Rab23	0.360212
Drg1	0.360151
Dctn3	0.35998
Lsm7	0.35989
Gm16712	0.359833
Kbtbd2	0.359409
Ccdc137	0.359289
Ftsj3	0.359186
Rsph1	0.35914
Gm13322	0.359011
Tinf2	0.358991
Gnl2	0.358612
Syf2	0.358559
Reep6	0.358399
Vcp	0.358357
Pgap1	0.358254
Kif3b	0.358125
Eif4b	0.358
Itm2c	0.357879
Hist3h2bb-ps	0.357854
Il11ra1	0.357612
Gap43	0.357537
Pno1	0.357535
Gm15606	0.357495
Rpn2	0.357259
Ak1	0.357252
Kcnj13	0.357195
Klhdc4	0.35718
Mgea5	0.357177
Wls	0.357158
Anapc5	0.357146
Smoc2	0.356958
Fam104a	0.356907
Fank1	0.356839
Camsap2	0.356806
Mga	0.356731
Pbx2	0.356703
Reps1	0.356543
Atraid	0.356515
Nfrkb	0.356496
Prkacb	0.356393
Trappc2l	0.35638
Ormdl3	0.35593
Cnppd1	0.355892
Bms1	0.355766
Akr1b3	0.355756
Lpin2	0.355476
Itga3	0.355456
Fcgr3	0.35521
Serinc1	0.355157
Tm9sf4	0.355089
Btrc	0.35508
Flt1	0.354901
Anapc13	0.354899
Smpd2	0.354874
1500009L16Rik	0.354798
Ptchd1	0.354786
Gm20683	0.35478
Prdm4	0.354598
Crmp1	0.354571
1190007I07Rik	0.354507
Slc2a12	0.35449
Col4a3	0.3543
1190005I06Rik	0.353959
Cap1	0.353717
Gadd45gip1	0.35366
Pnpo	0.353468
Tbcb	0.353449
Syne3	0.353353
Ccdc12	0.353349
Actg1	0.353345
Surf6	0.353197
Bmp7	0.35307
Etf1	0.353013
Rexo2	0.352909
Gm11696	0.352771
Ccl27a	0.35268
Cebpz	0.352651
Nfyb	0.352452
Sh3yl1	0.352242
Mrpl2	0.351882
Acsl1	0.351865
Atxn1l	0.351825
Peli1	0.351789
Bhlhb9	0.351603
Nr2f1	0.351597
D130043K22Rik	0.351593
Sult1a1	0.351525
Sema3a	0.35151
Tmem185b	0.351392
Prph	0.351207
Gm11613	0.351092
Bysl	0.350912
Grb10	0.350816
Nvl	0.350775
Utp15	0.350773
Ucp2	0.350665
Rps18	0.350643
Coq10b	0.350472
Smim18	0.350449
Gpr137c	0.3504
Azin1	0.350352
Cntn5	0.350251
Uhrf2	0.350219
Morn2	0.350044
Cfap20	0.349962
Rsph9	0.349857
Cd200	0.349829
Rpl10a	0.349761
Nudt1	0.349709
Sdhb	0.349645
Gm5819	0.349438
Cables1	0.349406
Il1r1	0.349322
Sostdc1	0.349278
Nfe2l1	0.34922
Slc30a7	0.349146
Smg6	0.348877
Slc25a25	0.348831
Prep	0.348746
D15Ertd621e	0.348731
Trappc5	0.348714
Sorcs3	0.348649
Hist1h4b	0.348537
6430548M08Rik	0.34845
Slc25a32	0.348362
Sema4a	0.348341
Gm23547	0.347452
Cep19	0.347238
Ubb	0.346904
Lamtor2	0.346843
Rgs10	0.346839
2410015M20Rik	0.346789
Macrod2	0.346781
Actr10	0.346702
Tmie	0.346663
Mrps22	0.346531
4931415C17Rik	0.346475
Ip6k2	0.346379
Zfp956	0.346353
Serping1	0.346271
Apmap	0.346243
Eif4ebp2	0.34622
Fzd3	0.346179
Mrpl39	0.346085
Tmem67	0.346044
Id1	0.345975
BC006965	0.345876
Pcp4	0.345827
A230050P20Rik	0.345768
Tfe3	0.345584
Mthfd1l	0.345528
Gm10052	0.345494
Rasl10a	0.345456
Hdhd3	0.345367
Sumf1	0.345339
Zbtb24	0.345246
Naalad2	0.345173
Rassf10	0.345159
Rrp1	0.345109
Tomm70a	0.345089
Sf3b3	0.345079
Polr2l	0.344974
Rcor1	0.344954
Gm26737	0.344858
Clk4	0.344509
Chd2	0.344428
Adamts5	0.344394
Nono	0.344344
RP23-444I6.3	0.344235
PCDHA9	0.344006
Polr2f	0.343919
Mtfr1l	0.343909
Rad51ap1	0.343883
Car12	0.343761
Angpt1	0.343636
Slc22a5	0.343473
Pomp	0.343426
Nim1k	0.343328
Cenpo	0.343196
Pam	0.343159
Fmo1	0.342976
Lrrc59	0.342953
Gm12992	0.342817
Eaf1	0.342739
Dnajc18	0.342516
Pus7	0.342472
Rpn1	0.342448
Tada2a	0.342431
Grcc10	0.342233
Zc2hc1a	0.342152
2410131K14Rik	0.341899
Tuba4a	0.341883
2010107G23Rik	0.341858
Rrp9	0.341845
Nkain4	0.341786
Zw10	0.341773
Hsf2	0.341749
Cyr61	0.34162
Lrrc49	0.341584
Gpsm1	0.341228
Bex2	0.341122
Ogt	0.341062
Reln	0.340931
Gm11469	0.340904
Gins1	0.340831
Rpp30	0.340815
Mrps9	0.340666
Rnf34	0.340661
Sult4a1	0.340612
Hspb11	0.340489
Slc22a3	0.340453
Ncbp2	0.340433
Crabp2	0.340348
Atrnl1	0.340327
Nat14	0.340258
Dnajb2	0.340047
Abcd4	0.339904
Cenpw	0.339869
Col13a1	0.33981
Shfm1	0.33977
Mpp7	0.339716
Oraov1	0.339714
Prpf3	0.339704
Lypd1	0.339681
Commd4	0.339586
Ankra2	0.339473
Fam207a	0.339395
Morf4l2	0.339271
Tmem191c	0.339136
Timm17b	0.338973
Zfp655	0.338906
Aen	0.33889
Slc19a3	0.338872
Htr1b	0.338865
Cbr4	0.338825
Ppid	0.338703
Adcyap1r1	0.338615
C230034O21Rik	0.338344
Sigmar1	0.338295
Ecscr	0.338282
Taf1d	0.338205
Stt3a	0.337979
Rnf149	0.337948
Ddx47	0.33793
Egr2	0.337878
Brd8	0.337814
Dcun1d3	0.337623
Zfp9	0.337411
Arhgap22	0.337405
Rpl23a-ps3	0.337351
Rrp12	0.337171
Rnasel	0.337051
1110065P20Rik	0.33705
Zfp324	0.337045
Lamc1	0.33704
Myom3	0.337011
Gm27675	0.336899
Zfyve20	0.3368
Mef2c	0.336693
Cenpt	0.336671
Aimp1	0.336615
Cfap97	0.336401
1700086L19Rik	0.336325
Med26	0.336139
Pthlh	0.336117
Drd1a	0.33587
4930578C19Rik	0.335709
Edn3	0.335699
Pwp1	0.335388
Abl2	0.335222
Sncg	0.335163
Gm8615	0.335158
March5	0.335036
Snrpd1	0.334995
Gpld1	0.334914
Apex1	0.334667
Rrp15	0.334659
Ppp1r7	0.334511
Nup85	0.334508
Atf4	0.334324
Cpxm1	0.33428
Tmbim4	0.334261
Bdnf	0.334138
Zfp697	0.33412
Sf3b1	0.333894
Cox17	0.333835
Apbb1ip	0.333768
Aox3	0.333741
Mapk3	0.333699
Eno1	0.333667
Nfyc	0.333584
Ctu2	0.333575
Etnppl	0.333562
Blzf1	0.333557
Acadsb	0.333506
Slc13a4	0.333499
Mtag2	0.333316
B3galnt1	0.333251
Slc26a6	0.333097
Atg16l1	0.333089
Gria4	0.333057
Gas1	0.332898
Cfap58	0.332864
Bace2	0.332779
Rpl3	0.332714
Atp6v1h	0.332203
Hgf	0.332032
Sptan1	0.331914
Psmb4	0.331911
Kdm2a	0.331882
Pfdn6	0.331826
Taf2	0.331651
Scn7a	0.331527
1300002E11Rik	0.33135
Tgfb1i1	0.331271
Ccdc120	0.331242
Cep57l1	0.331198
Itpripl1	0.331144
Rnh1	0.331116
Ercc2	0.331067
Tnc	0.330774
Ramp1	0.330754
D830030K20Rik	0.330547
Dnhd1	0.330267
Lin37	0.330253
Pex19	0.330242
Bloc1s4	0.330116
Tex10	0.330094
Naa38	0.330029
Fdps	0.329942
Mak	0.329934
Cwf19l1	0.329837
Epha7	0.32983
U2af2	0.32979
Rlim	0.32974
Rce1	0.329717
Ccdc107	0.329666
Gm8822	0.329568
RP23-125I14.2	0.329421
Ctnnd1	0.329403
Thumpd1	0.329319
Lrat	0.329254
Acot7	0.329138
Ptprm	0.32908
Pspc1	0.32885
Tmem120a	0.328742
BC021891	0.328707
Rbm8a	0.328598
Ufd1l	0.328563
Asna1	0.328519
Ccdc142os	0.328411
Emd	0.328372
Fermt1	0.328182
Slc26a7	0.328168
Rtcb	0.328115
Zfp688	0.328082
Gm15344	0.327996
Minpp1	0.32796
Ran	0.327936
Ddi2	0.327936
Wif1	0.327774
Pcdhgb8	0.327402
Wdr3	0.327325
Prkcd	0.327286
Srgap2	0.327092
Ube2z	0.327079
Gm4735	0.326937
1500035N22Rik	0.326903
Dcdc5	0.326755
Atp2a3	0.32671
Lrrc75a	0.326487
Gm14964	0.326428
Atg4a	0.325768
Gm13225	0.325361
Coq4	0.325114
1110037F02Rik	0.325037
Zscan18	0.324777
Trip12	0.324619
Sgms2	0.32461
Sco2	0.324593
Pkmyt1	0.324483
Tmem237	0.324414
Setd6	0.324396
Tango2	0.32434
Tjp1	0.324248
Hnrnpk	0.324018
Erlin1	0.323889
Zfp384	0.323884
Slc31a1	0.323834
Nln	0.323761
Usp11	0.32367
G630016G05Rik	0.323657
Utp18	0.323548
Rdh10	0.323545
Smoc1	0.323225
Cradd	0.322931
Gm9989	0.3228
Lmln	0.322748
Lrch1	0.322698
Cpeb1	0.322692
Cdh13	0.322634
Rsl1	0.322596
Lmna	0.32256
Rps4l	0.322501
H2-M5	0.32245
Cpsf3	0.322449
Rab3b	0.322418
Abca4	0.322119
Tmem97	0.321958
Bbs5	0.321875
Asic4	0.321818
Trim7	0.321807
Wbp2	0.321718
Klhl28	0.321531
Klf5	0.321366
Sertad3	0.32134
Kdm5c	0.321299
Xrcc2	0.321288
Zfp788	0.321191
Vdac3	0.321081
Exoc7	0.320959
Ppm1g	0.320903
Tceal6	0.32069
RP24-444I15.1	0.320641
Lrp8os2	0.320593
Ciart	0.320489
RP23-103B18.8	0.320295
Mfsd11	0.319978
Hist1h2ak	0.319809
Tnfsf10	0.319805
Acad8	0.319652
Klf4	0.31948
Cetn3	0.319217
Npy1r	0.319172
Nif3l1	0.318862
Fbxl12	0.318836
Ube2s	0.3187
Cyp46a1	0.318692
Upf3b	0.318667
Hnrnpab	0.318542
Bloc1s2	0.318485
Paox	0.318482
Nit2	0.318406
Gucy1b3	0.318395
Tor1a	0.318381
Icam5	0.318348
Map3k8	0.318245
Fem1b	0.318238
Dnase1l2	0.318219
F5	0.318123
Snx8	0.318066
Ttr	0.317881
Msl3	0.31788
Dxo	0.31784
Ltv1	0.317658
Vwa8	0.317623
Pik3r6	0.317605
Tbc1d9	0.317259
Rnf19b	0.317088
Akap8	0.31702
Fbxo16	0.316932
Kirrel2	0.316914
Gm5900	0.31687
Hdac3	0.316798
Sdf2	0.31677
Gm4876	0.316669
Strap	0.316501
Fam167a	0.316486
Cmpk1	0.316452
Strada	0.316388
Rpf1	0.316349
Tbpl1	0.316334
Stxbp6	0.316308
Clic6	0.316168
Zfp934	0.315985
Rps13	0.31592
Tbc1d10b	0.315664
Spire2	0.315613
Pja1	0.315581
Irf2bp2	0.315541
Srp19	0.315482
Chordc1	0.315338
Mdm2	0.31512
Fam105a	0.315086
Prpf39	0.315029
Slc13a3	0.314981
Parp2	0.314929
Bclaf1	0.314924
Hist1h4i	0.314872
Uevld	0.314754
AI413582	0.314665
Folr1	0.314434
Pdyn	0.314371
N4bp3	0.314304
Csnk2b	0.314221
Cetn2	0.314142
Nop56	0.314053
Sys1	0.313919
Cdk5rap1	0.313878
Abca8b	0.313793
Tha1	0.313769
Ap1m2	0.313715
Rnf103	0.313578
P4htm	0.313448
Dcakd	0.313439
1700001L19Rik	0.313385
Sfxn2	0.313329
Slc5a3	0.313157
Sfr1	0.312698
Rit1	0.312544
Calm2	0.312539
Clcn3	0.312418
Slc24a4	0.312385
Kpnb1	0.312336
Tmem19	0.312237
Usp37	0.312132
Mtch1	0.312
Ahsa2	0.311987
Naa10	0.311567
Atox1	0.311395
Alg13	0.311374
Ndufa4l2	0.311339
Fig4	0.311296
Mea1	0.311182
Glb1l	0.310836
Trafd1	0.310745
Fam171a2	0.310674
8430429K09Rik	0.310618
Psmc3ip	0.310535
9430008C03Rik	0.310525
Airn	0.310269
Tmem29	0.310218
Siah1b	0.310165
Oprl1	0.310104
Pmaip1	0.310099
8430432A02Rik	0.310006
Dpp3	0.309969
Matr3	0.309738
Slc4a5	0.309404
RP24-325N3.3	0.309292
Ccdc36	0.309234
Galnt10	0.309144
Col14a1	0.308981
Ppfibp1	0.308814
Brpf1	0.308809
Alox8	0.308741
Pik3ap1	0.308475
Thbs2	0.308393
Spg21	0.30822
Gdf10	0.307993
Hist1h4j	0.307895
Xpc	0.307789
Rasgrp2	0.307784
Hspa13	0.307542
Eif2s3x	0.307501
Crispld1	0.30728
Smurf2	0.307227
Cldn2	0.307159
Polr2h	0.306973
Prrx1	0.30694
Lsg1	0.306918
Ccdc113	0.306903
S1pr3	0.306871
Ndor1	0.306733
Cbx7	0.306654
Rsph3a	0.306555
4930430F08Rik	0.306472
Scn3a	0.30647
Zfp97	0.30647
Ago4	0.306375
Srek1	0.30627
Ncald	0.306249
Ltbr	0.306116
Ogfod2	0.306063
Cntnap5a	0.30602
Srsf10	0.306002
Rrp1b	0.30583
Mrpl41	0.30581
Spns1	0.305754
Impg2	0.305712
Pim2	0.30561
Tfg	0.305244
Morf4l1	0.305228
Gzf1	0.30515
Anapc10	0.305064
Pcyox1	0.305053
Dnajb11	0.304964
Lsm14b	0.304858
Gm4419	0.304849
Bcor	0.304838
Arfgap1	0.304661
Mrps27	0.304623
Trim33	0.304568
Amotl2	0.304522
Scyl2	0.30445
Cux2	0.304256
Tro	0.304205
Trmt2a	0.30419
Lrrc73	0.304157
Gm15991	0.304143
Tbc1d32	0.304118
Rpusd4	0.304111
Tmem116	0.304041
Stk32c	0.304035
Psma3	0.303978
Hmgb2	0.303967
Actn3	0.303957
Fanca	0.303911
Gabra4	0.303906
Fbxo28	0.303781
Sesn2	0.303743
Cyb5r3	0.303723
Zkscan16	0.303713
Spata13	0.303695
Exosc3	0.303661
Ccdc80	0.30356
Rbm46	0.30355
Chgb	0.303524
4930467D21Rik	0.303344
Plagl2	0.303282
Asun	0.303227
Tvp23b	0.303204
Rfxap	0.302901
Sgms1	0.302889
Cd86	0.302879
Epha3	0.302867
Atp6v1d	0.302827
Gda	0.302757
Kcnt1	0.30244
Cpt1a	0.302326
2700094K13Rik	0.302253
Dus3l	0.302123
Dimt1	0.302093
Otx2	0.302076
Ccdc155	0.301993
Vkorc1	0.301893
RP24-193D9.4	0.301843
Smchd1	0.301777
Vps18	0.301764
Pkia	0.301734
Trim47	0.301654
Gatb	0.301556
Ddx42	0.301552
Parvg	0.301491
Ndrg4	0.301271
Rab13	0.301228
Ccdc126	0.301183
Cnot1	0.301176
1810030O07Rik	0.301082
RP23-193J20.4	0.300913
Poc1a	0.300875
Ddx5	0.300835
Ier5l	0.300806
Wdr89	0.300717
Fbxw2	0.300589
Mfrp	0.300351
Cdh18	0.30017
Klhl7	0.300156
Gm26779	0.300142
Gm15542	0.300068
Ssr3	0.299974
Itm2b	0.299754
Zfp949	0.299743
Fzd4	0.299709
Tet2	0.299619
Prmt2	0.299479
Wdr1	0.299448
Bco2	0.299368
Gpr182	0.299032
Slc20a1	0.299001
Ndufa1	0.298934
Gm15283	0.298911
Lamb2	0.298821
Gm12841	0.298688
Plod2	0.29865
Jakmip1	0.298475
Thoc3	0.298396
Creb1	0.298351
Aldh7a1	0.298341
Pxylp1	0.298268
Pde7a	0.298242
Bcl2l2	0.298231
Ppp1r1b	0.298151
Cfap61	0.298127
Col23a1	0.298104
Vangl1	0.297965
Jakmip2	0.297934
Slc25a51	0.297862
0610043K17Rik	0.297842
Crybg3	0.297821
Ttc6	0.297745
Srf	0.297648
Uqcc3	0.297518
Pnma1	0.297291
Cln5	0.297258
Ccdc51	0.297235
Uba2	0.297158
Camk1	0.296984
B930082K07Rik	0.296903
4932438H23Rik	0.296817
Nop2	0.296815
Fbxo34	0.296645
Snrpd3	0.296544
Vps33a	0.29653
Rpa2	0.296497
Gpr63	0.296488
Ablim1	0.296486
Cdc23	0.296484
Ube2m	0.296447
2810454H06Rik	0.296352
Il17rd	0.296329
Rabggtb	0.296278
Fam46c	0.296276
Hmgcs1	0.296252
Gm8430	0.296234
Orc2	0.296208
As3mt	0.296189
Ak5	0.296075
Bbs4	0.296065
Bmp1	0.296064
Psmd11	0.295859
Mis12	0.295822
Xpot	0.29564
Numbl	0.295592
Nsg2	0.295589
Dok5	0.295409
Kctd10	0.295368
4930563E22Rik	0.295314
Ssrp1	0.295186
Erc2	0.295159
RP23-180C14.1	0.295105
Schip1	0.295102
Nme5	0.294955
Pla2g15	0.294924
Tle1	0.294793
Scaper	0.294753
Tex22	0.294652
Adamtsl3	0.29453
4930539E08Rik	0.29451
Cuedc1	0.294471
Cemip	0.294379
Rps24	0.294355
Knop1	0.294224
Gm11627	0.294064
Gm21981	0.294062
Zgrf1	0.294046
Rps20	0.293898
Bst1	0.293813
Tceb3	0.29356
Pde10a	0.293531
A230072E10Rik	0.293449
Ncbp1	0.2934
Clec18a	0.293389
St6gal2	0.293362
Rfc4	0.293319
Ankfn1	0.293276
Mex3d	0.293112
Bex1	0.292958
Pygl	0.29294
Twf1	0.29266
Commd7	0.292642
Gorasp2	0.29262
Ptgdr	0.29257
RP23-27C10.2	0.292545
Klc3	0.292533
Mok	0.29244
Yars2	0.292437
Gm765	0.292363
Apoa1	0.292095
Hmgb1-ps7	0.29208
Aplp2	0.29199
4430402I18Rik	0.291821
Hrh1	0.29128
Ccdc132	0.291217
Atrx	0.291126
Cacna2d1	0.291091
Slc1a5	0.290906
Nrip1	0.290891
Ldhd	0.290799
Sap30bp	0.290401
Metap2	0.290226
Cltb	0.290144
Jun	0.290138
Pes1	0.290131
Wdr35	0.290091
Kl	0.290059
Bud31	0.290039
Trp53inp1	0.289817
1810013L24Rik	0.289616
Fut10	0.28954
Smg7	0.289431
Tmem39a	0.289404
Ice1	0.289344
Gm6542	0.289246
Hnmt	0.289142
Lyve1	0.289126
Fgf9	0.289084
Ric8b	0.289037
Oxr1	0.288843
Dcaf7	0.28884
Gm3650	0.28872
Gm28043	0.288711
4831440E17Rik	0.288708
Isoc2b	0.288667
Plekhj1	0.288569
Cebpg	0.288527
Gm5527	0.28851
Trp53i13	0.288469
Birc2	0.288366
Erbb2	0.288296
Psmd2	0.288271
F8	0.288197
Cdc37	0.288194
Mrpl12	0.288146
Rpl27	0.288105
Prkd2	0.288042
Sesn1	0.287982
Sparcl1	0.287863
AA414768	0.28781
Phax	0.287778
Amy1	0.287762
Klhl8	0.287547
Lin7b	0.287537
Ppp1r12a	0.287445
Asb11	0.286877
Mycn	0.286863
1110004E09Rik	0.286702
Tcta	0.286577
Trmt12	0.286574
Itpkc	0.286557
Perp	0.286417
Per2	0.286222
Naga	0.285912
Pin4	0.285828
2610002M06Rik	0.285605
Creg2	0.285581
Ccnj	0.285243
Pgls	0.285161
Cenpa	0.285131
Uba52	0.28488
Tbx15	0.284344
Nmnat2	0.284288
C1qtnf4	0.284264
Msantd4	0.284242
Xylb	0.284133
Tcp1	0.284126
1700037C18Rik	0.284119
Zc3h3	0.284045
Txnl4a	0.283856
Rcor2	0.28383
Psmb1	0.283659
Rpl11	0.28359
Egflam	0.283569
Agfg2	0.283455
Gpr165	0.283375
Ube2w	0.283367
Magi3	0.283358
Naa30	0.28332
Foxj2	0.283316
Map7	0.283188
Eif1a	0.283158
Ets2	0.283117
Tpm3	0.283081
Zfp938	0.283035
Top2b	0.282937
Zfp667	0.282878
6330549D23Rik	0.282789
Rarres2	0.282716
Hook1	0.282683
Gm21971	0.282606
Cdk10	0.282357
Col8a2	0.282293
Fxyd6	0.282207
Fgfr1op2	0.282177
Nup188	0.282028
Znrd1	0.281968
Tmem110	0.281937
Tomm22	0.2818
Fam227b	0.281712
Gm5436	0.281624
Gtpbp6	0.281298
Rmdn2	0.281196
Obsl1	0.281088
Cct4	0.28095
Snrnp25	0.280824
Gpr98	0.28074
Gorab	0.280626
Igfn1	0.280506
Ptrh1	0.280472
Hspa2	0.280453
Sema3g	0.280433
Slc1a6	0.280416
Ccdc55	0.280364
RP23-71J17.5	0.28034
Paf1	0.280293
1700029I15Rik	0.2802
Elp3	0.280128
Enpp5	0.27986
Simc1	0.27977
Plk2	0.279626
[truncated: 12,445 more rows]
