# Supplementary material for: Social interaction-induced activation of RNA splicing in the amygdala of microbiome-deficient mice
Source: eLife. 2018 May 29;7:e33070. doi: 10.7554/eLife.33070 (PMC5995540; doi:10.7554/eLife.33070)
Supplement: Supplementary file 8. [file elife-33070-supp8.xlsx]

## Sheet: RNA sample quality
		260/280nm ratio (Nanodrop)	RIN (bioanalyzer)	Used for pooling --> sequencing?			260/280nm ratio (Nanodrop)	RIN (bioanalyzer)	Used for sequencing?
Naive	CON1	1.83	7	✅	SI	CON1	1.92	No RIN calculated, Bioanalyzer output visually approved
	CON2	1.94	8.5	✅		CON2	1.94	9.1	✅
	CON3	1.95	No RIN calculated, Bioanalyzer output visually approved	✅		CON3	1.94	9.1	✅
	CON4	1.95	8.1	✅		CON4	1.97	No RIN calculated, Bioanalyzer output visually approved
	CON5	1.92	No RIN calculated, Bioanalyzer output visually approved	✅		CON5	1.89	No RIN calculated, Bioanalyzer output visually approved	✅
	CON6	1.9	No RIN calculated, Bioanalyzer output visually approved	✅		CON6	1.94	9.3	✅
	CON7	1.91	8.5	✅		CON7	1.97	9.1	✅
	CON8	1.91	8.6	✅		CON8	2	No RIN calculated, Bioanalyzer output visually approved
	GF1	1.88	No RIN calculated, Bioanalyzer output visually approved	✅		CON9	1.98	9.1
	GF2	1.97	8.5	✅		CON10	2	8.8	✅
	GF3	1.87	8.2	✅		CON11	1.86	9	✅
	GF5	1.95	9	✅		CON12	1.94	9.3	✅
	GF6	1.98	9.2	✅		GF1	1.91	8.7	✅
	GF7	1.87	8.9	✅		GF2	2	8.9	✅
	GF8	1.9	No RIN calculated, Bioanalyzer output visually approved	✅		GF3	1.91	No RIN calculated, Bioanalyzer output visually approved	✅
	exGF1	1.86	8.9	✅		GF4	1.97	No RIN calculated, Bioanalyzer output visually approved	✅
	exGF2	1.96	9	✅		GF5	2	8.7	✅
	exGF3	1.83	9.4	✅		GF6	1.96	8.6	✅
	exGF4	1.92	8.8	✅		GF7	1.91	No RIN calculated, Bioanalyzer output visually approved	✅
	exGF5	1.95	9.1	✅		GF8	1.97	8.6	✅
	exGF6	1.94	9.4	✅		GF9	1.88	8.7	✅
	exGF7	1.71	9	✅		GF10	1.99	8.7	✅
	exGF8	1.95	8.2	✅		GF11	1.91	No RIN calculated, Bioanalyzer output visually approved	✅
						GF12	1.93	8.9	✅
						exGF1	1.92	8.4
						exGF2	2	8.9
						exGF3	1.9	9	✅
						exGF4	1.96	No RIN calculated, Bioanalyzer output visually approved	✅
						exGF5	1.95	8.2	✅
						exGF6	1.92	8.2	✅
						exGF7	1.87	No RIN calculated, Bioanalyzer output visually approved	✅
						exGF8	1.95	8.2	✅
						exGF9	1.74	No RIN calculated, Bioanalyzer output visually approved	✅
						exGF10	1.91	No RIN calculated, Bioanalyzer output visually approved	✅
						exGF11	1.97	7
						exGF12	2.01	8.5

## Sheet: Sample data qualuty
	Raw read pairs	Mapped read pairs	[%]	Exonic	[%]
CON-P1	23357502	19821791	0.848626	10479993	0.528711
CON-P2	19996544	19305649	0.965449	13093369	0.678214
CON-P3	25826399	23470085	0.908763	13924092	0.59327
CON-P4	21968673	21102472	0.960571	13303723	0.630434
CON-S10	16681665	15955114	0.956446	10959458	0.686893
CON-S11	25603258	24069697	0.940103	15157737	0.629744
CON-S12	26365901	25088207	0.95154	17465387	0.696159
CON-S2	23787768	22512528	0.946391	14925053	0.662967
CON-S3	24229804	23331475	0.962925	14871219	0.637389
CON-S5	24212986	22994582	0.94968	15086123	0.656073
CON-S6	22816311	21631616	0.948077	13612582	0.629291
CON-S7	26512891	24812701	0.935873	16151169	0.650923
GF-P1	24056726	22968339	0.954757	14707295	0.640329
GF-P2	19781093	18912608	0.956095	12672018	0.67003
GF-P3	16534894	15829626	0.957347	10153860	0.641447									1-way ANOVA: n.s. (F(5,34)=0.77; p=0.58)
GF-P4	25345776	23985585	0.946335	15320023	0.638718
exGF-P1	22953732	20131071	0.877028	12111605	0.601637
exGF-P2	17433523	16047870	0.920518	10271854	0.640076
exGF-P3	19212251	18494039	0.962617	12377463	0.669268
exGF-P4	25868955	24761067	0.957173	16959682	0.684933
exGF-S10	20111009	18295155	0.909708	10909751	0.596319
exGF-S3	21092959	19328695	0.916358	12830039	0.663782
exGF-S4	28006991	25340233	0.904782	14744810	0.581873
exGF-S5	26417955	24279647	0.919059	15885283	0.654263
exGF-S6	25024279	22949608	0.917094	14521757	0.632767
exGF-S7	30727228	26237439	0.853882	15228345	0.580405
exGF-S8	26113252	24092710	0.922624	15915149	0.660579
exGF-S9	24320429	22574267	0.928202	15813778	0.700522
GF-S10	21318541	19570494	0.918003	12979407	0.663213
GF-S11	30526754	27919621	0.914595	19421017	0.695605
GF-S12	20066984	18308872	0.912388	11827014	0.645972
GF-S1	13036850	12057729	0.924896	7291810	0.604742
GF-S2	30963933	28501803	0.920484	19961958	0.700375
GF-S3	21067081	19516211	0.926384	13031804	0.667743
GF-S4	20971509	19036059	0.907711	11676879	0.613408
GF-S5	28789430	25534739	0.886948	15937529	0.624151
GF-S6	23179624	21145422	0.912242	14503636	0.6859
GF-S7	21992041	20477796	0.931146	14237891	0.695284
GF-S8	26439947	24114894	0.912063	16483267	0.683531
GF-S9	24742381	22472509	0.90826	15103884	0.672105
Means	2.34364e+07	2.16745e+07	0.926329	1.40477e+07	0.647226
P: Pool of two samples (except GF-P2, just one sample)
S: social interaction (SI)
